# Supplementary material
Source: PubMed Central journal article supplement (PMC2785581)

Kinetic Data of Carbon Source Utilisation

PM01, A01 (Negative Control)

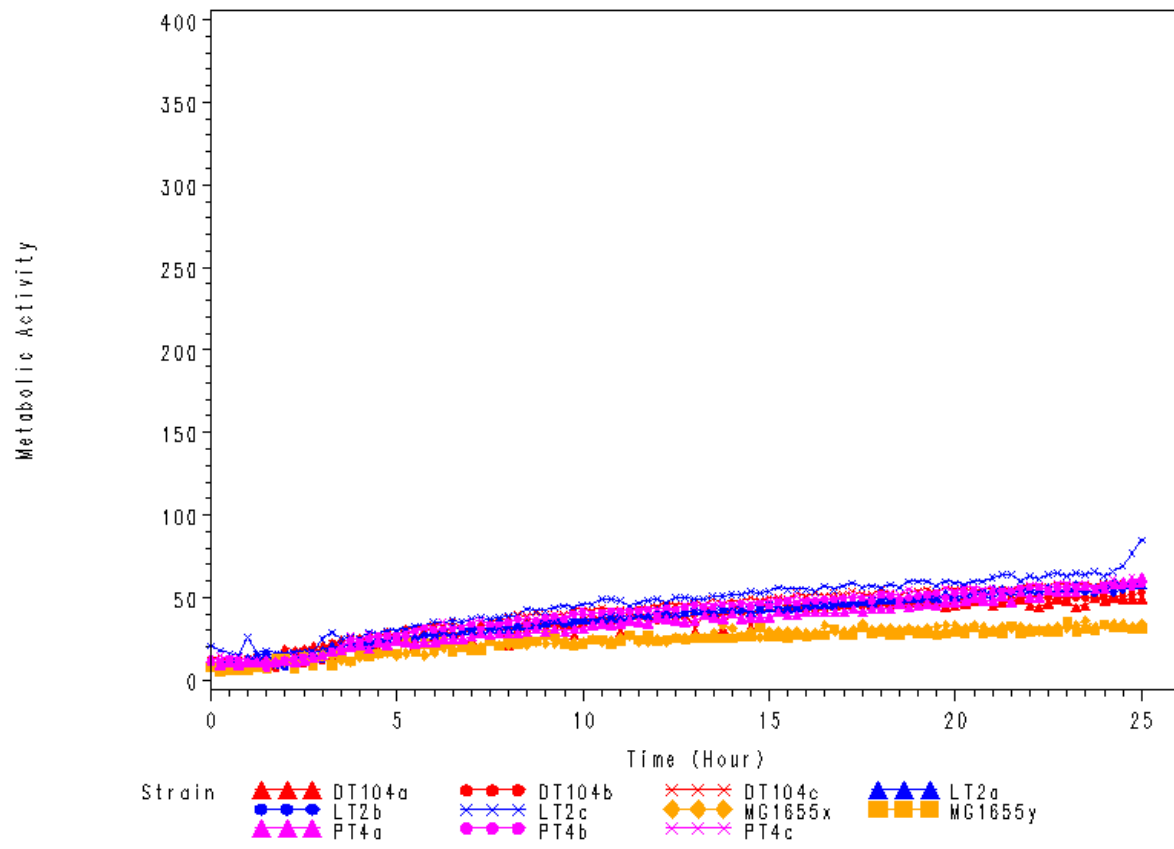

PM01, A02 (L-Arabinose)

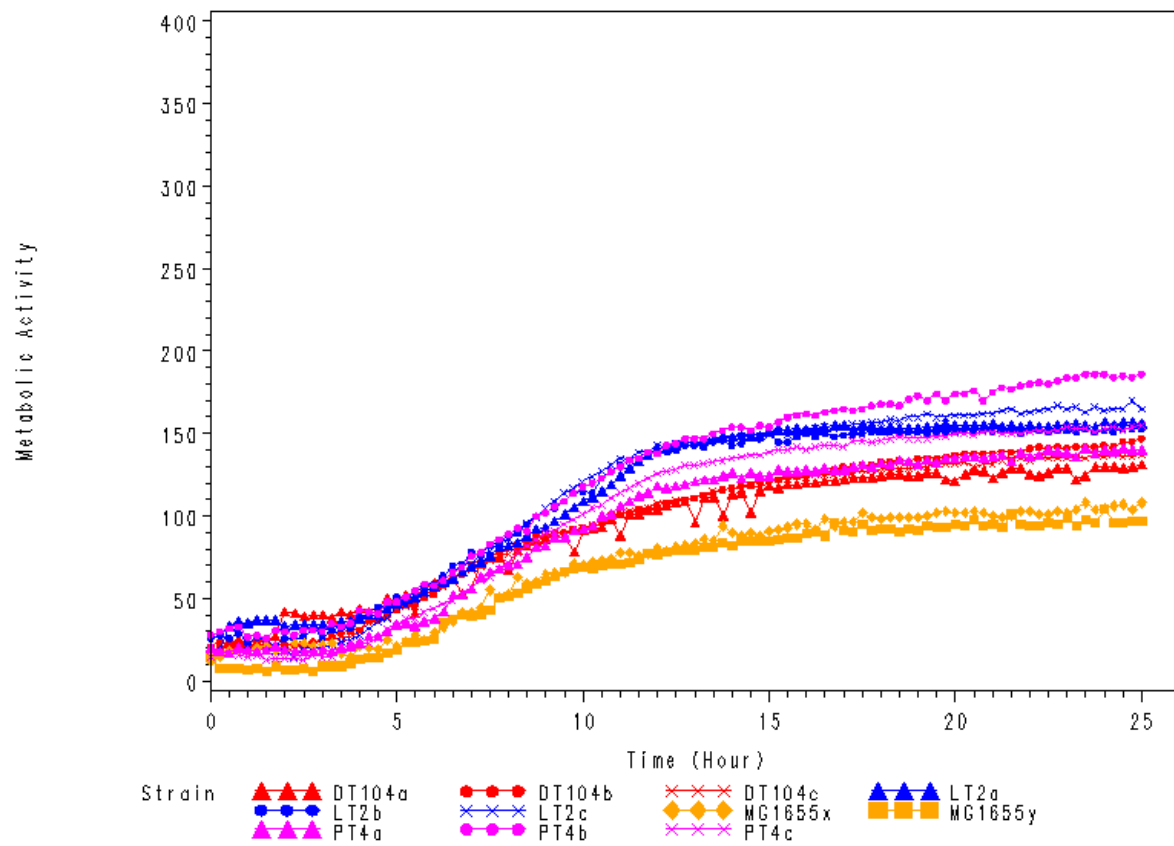

PM01, A03 (N-Acetyl-D-Glucosamine)

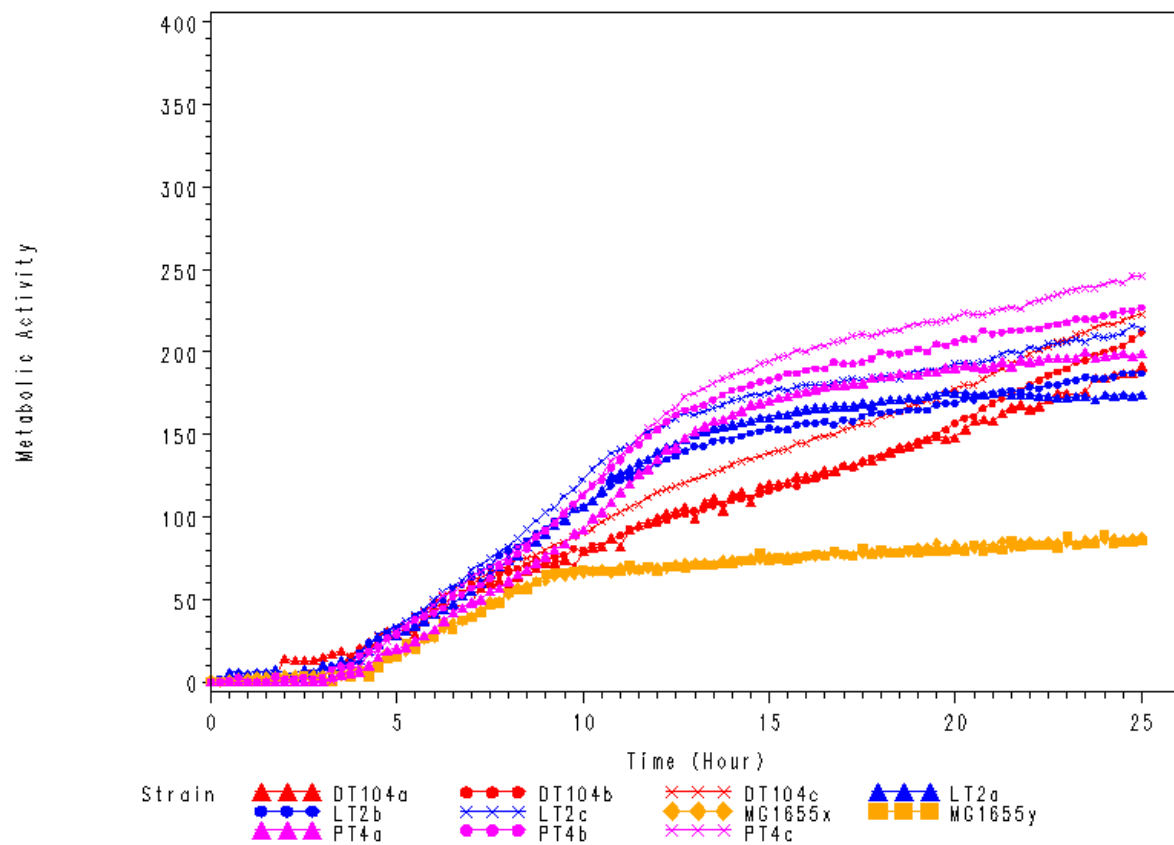

Kinetic Data of Carbon Source Utilisation

PM01, A04 (D-Saccharic Acid)

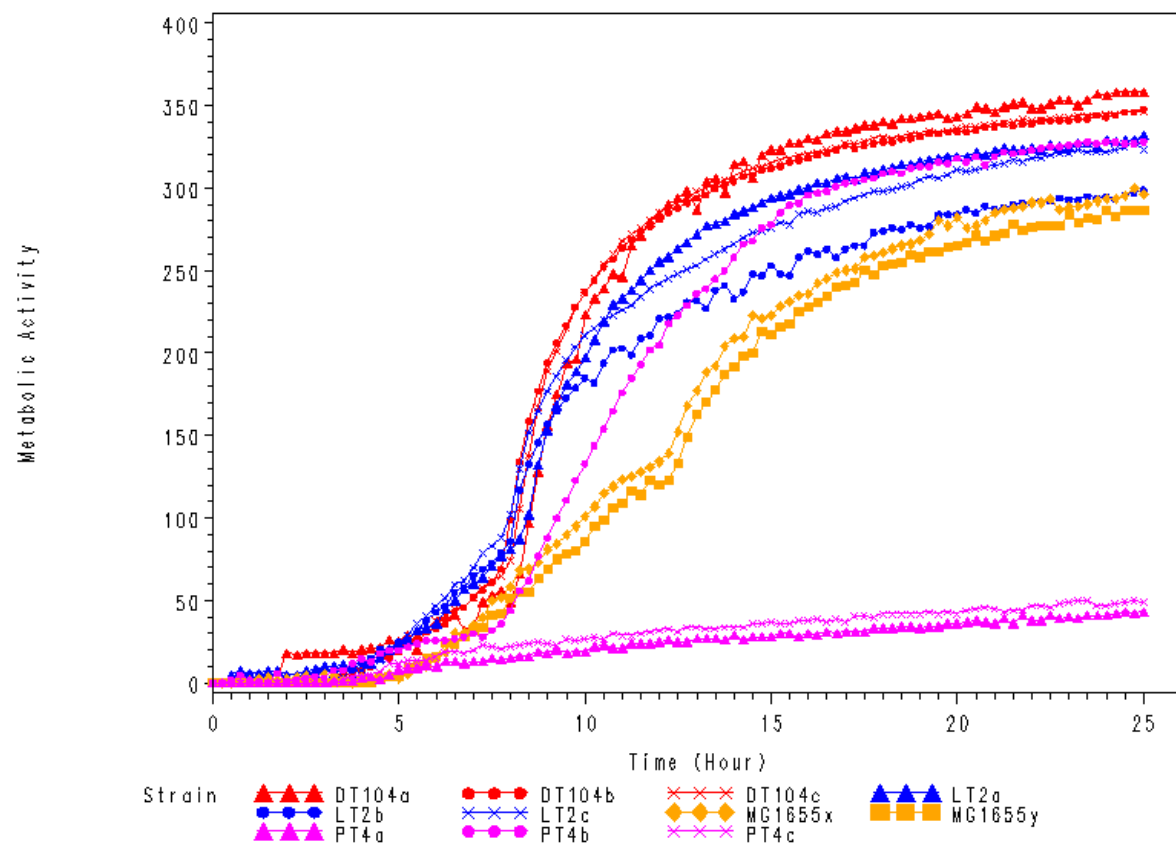

PM01, A05 (Succinic Acid)

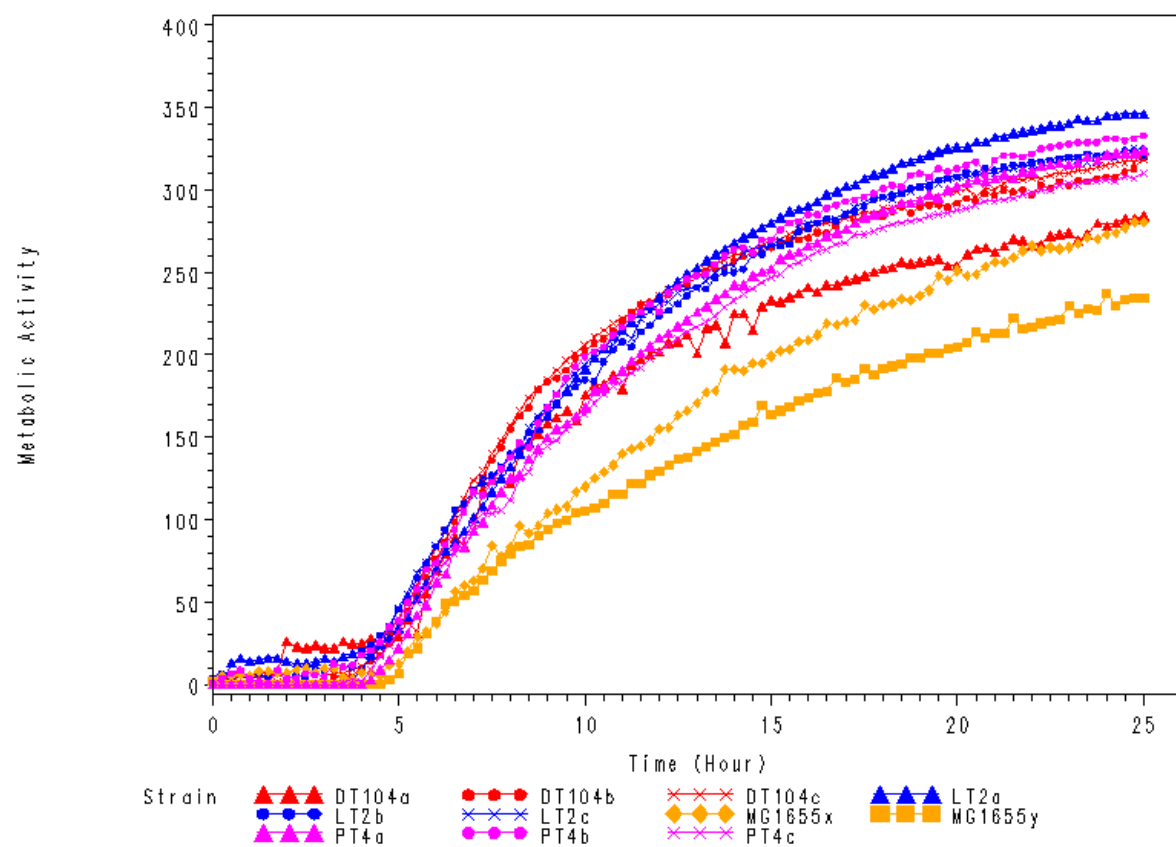

PM01, A06 (D-Galactose)

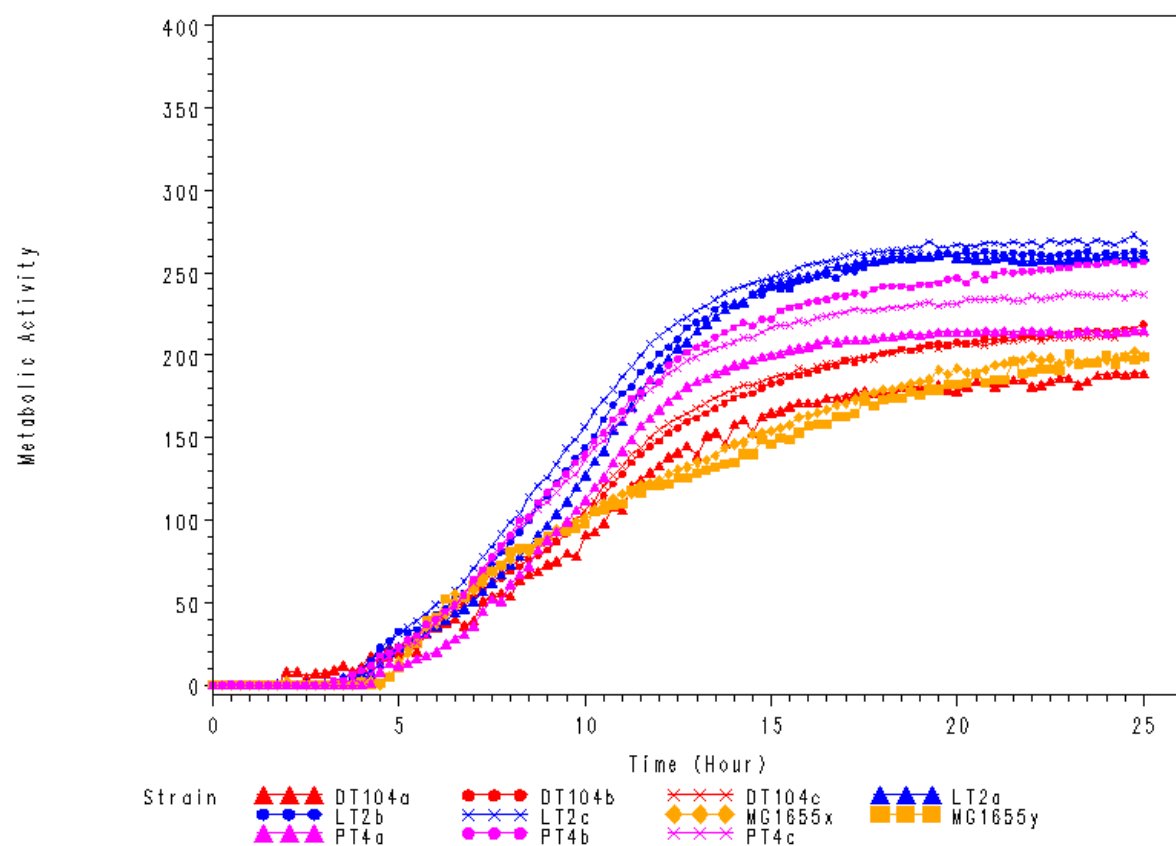

Kinetic Data of Carbon Source Utilisation

PM01, A07 (L-Aspartic Acid)

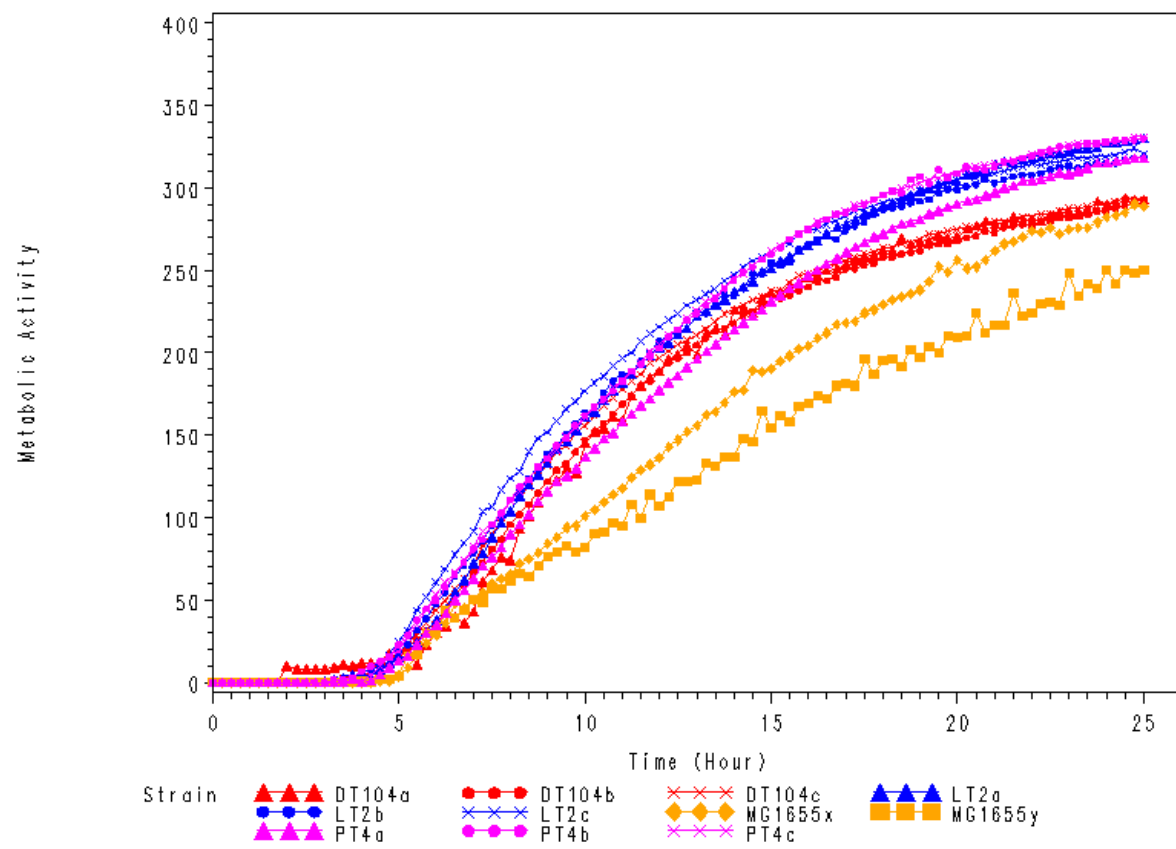

PM01, A08 (L-Proline)

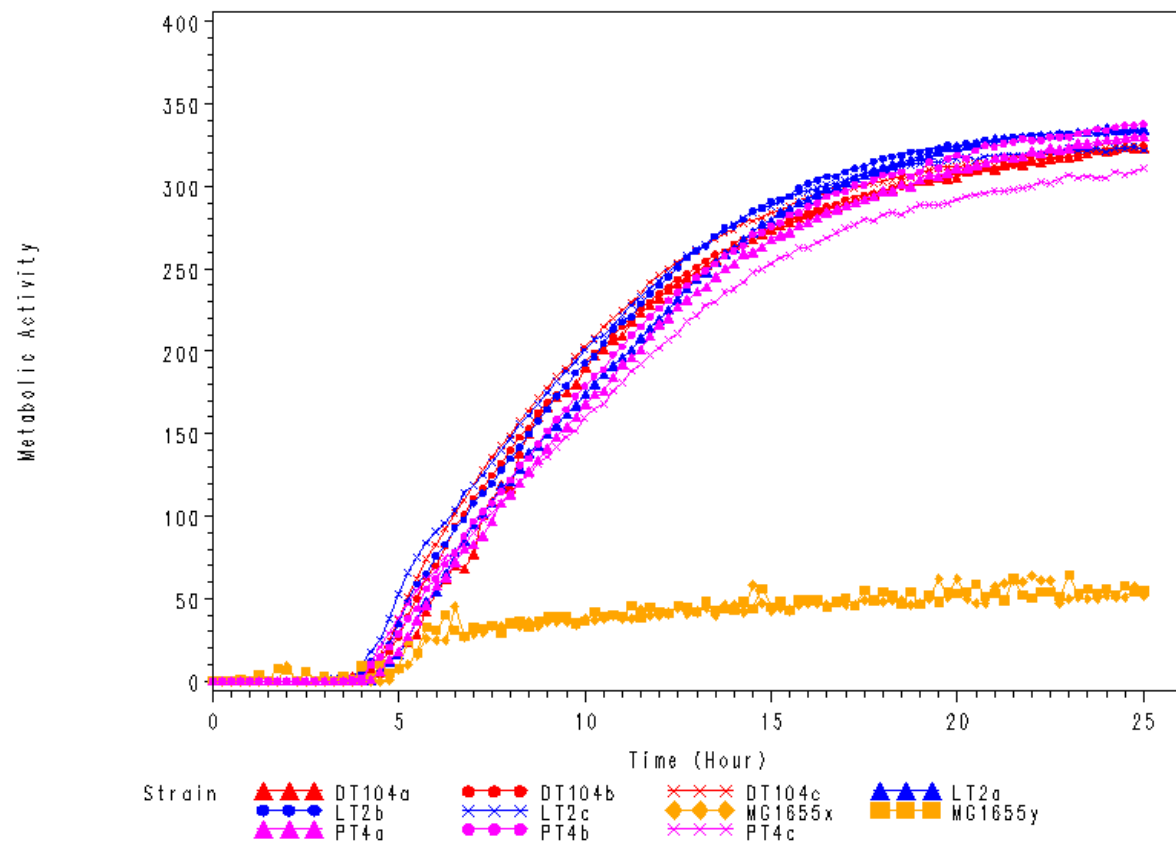

PM01, A09 (D-Alanine)

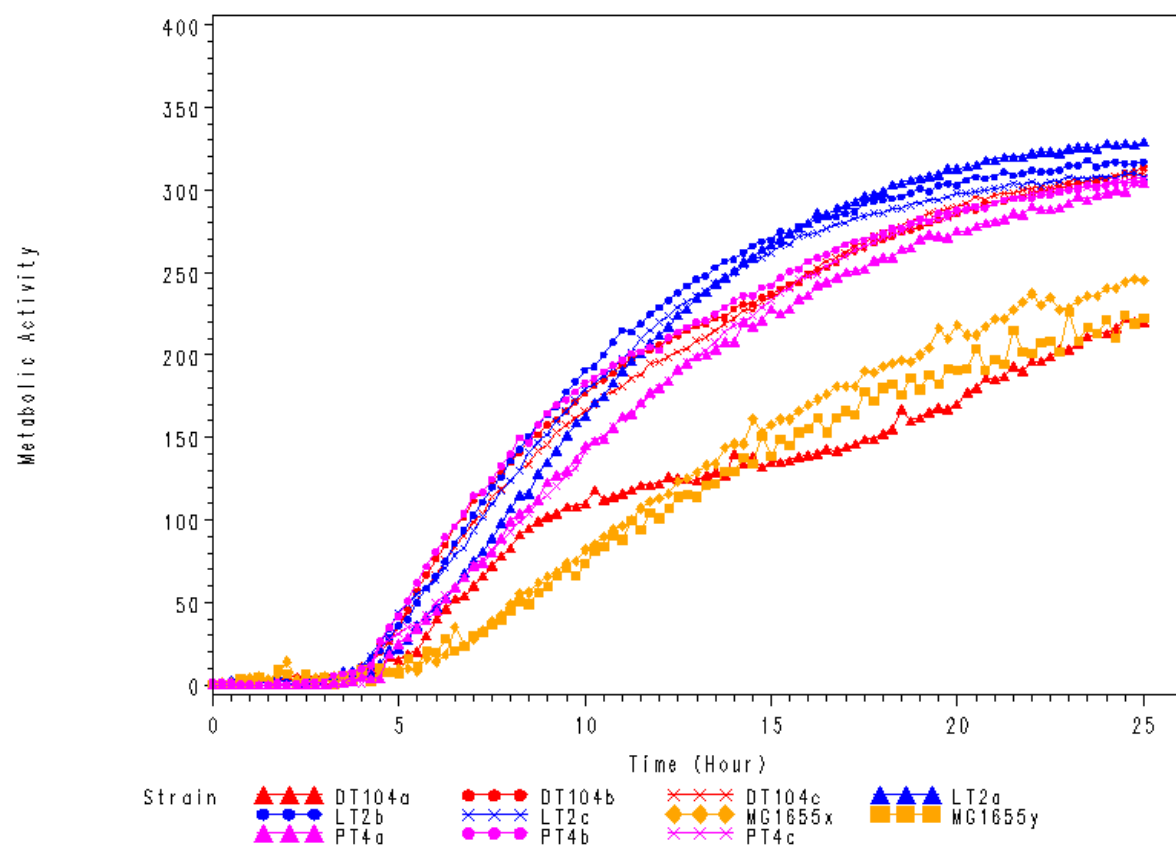

Kinetic Data of Carbon Source Utilisation

PM01, A10 (D-Trehalose)

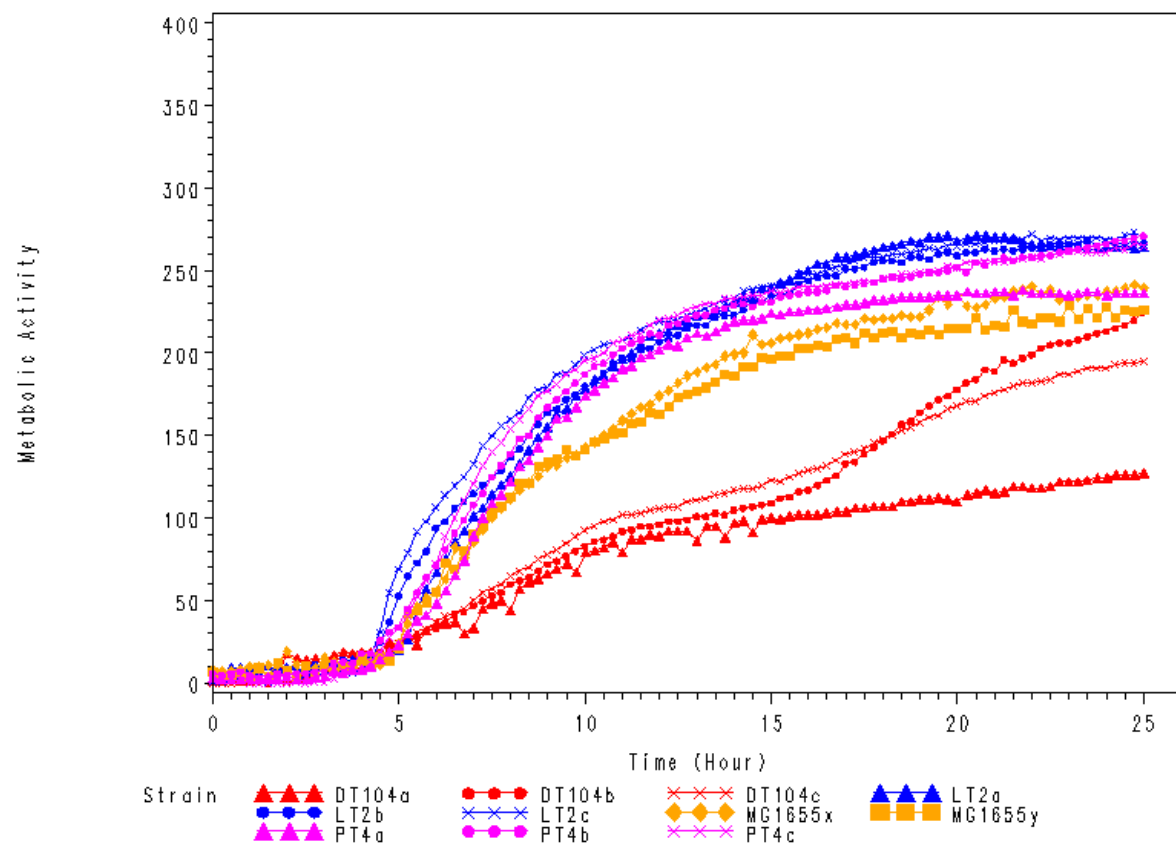

PM01, A11 (D-Mannose)

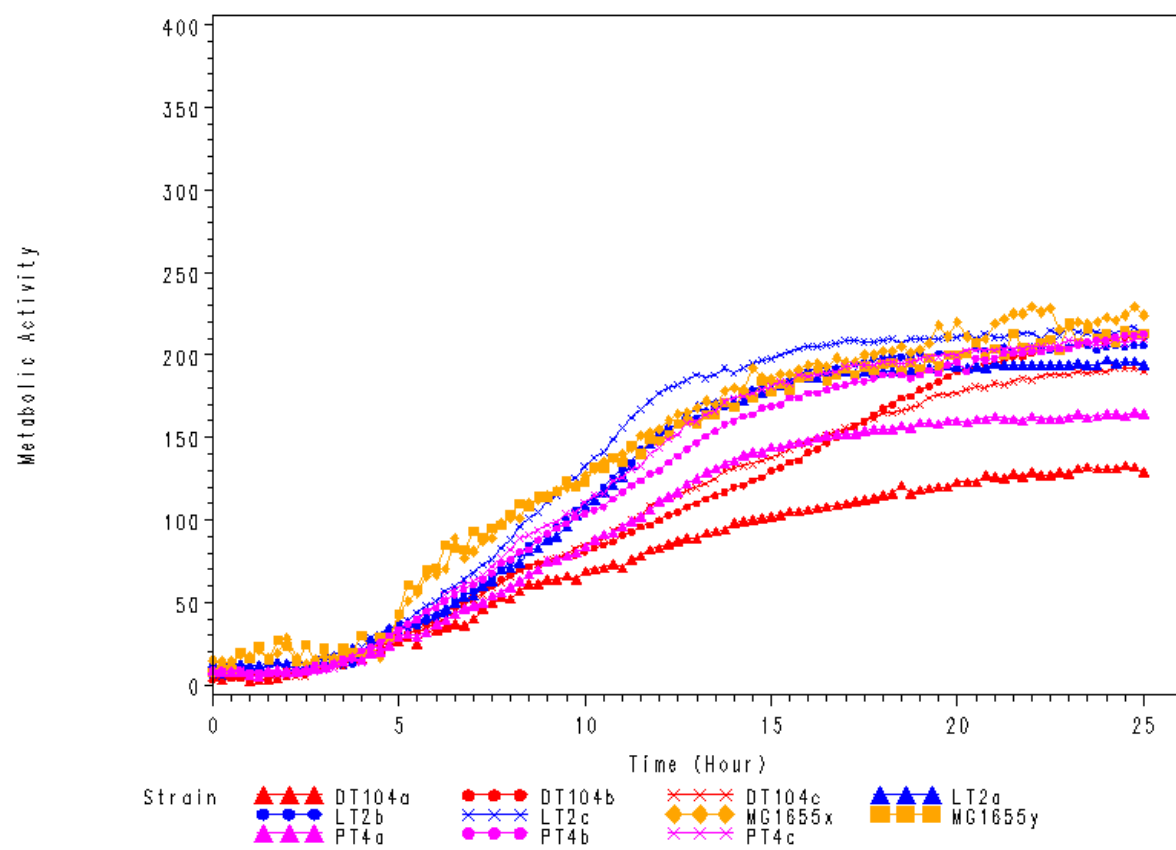

PM01, A12 (Dulcitol)

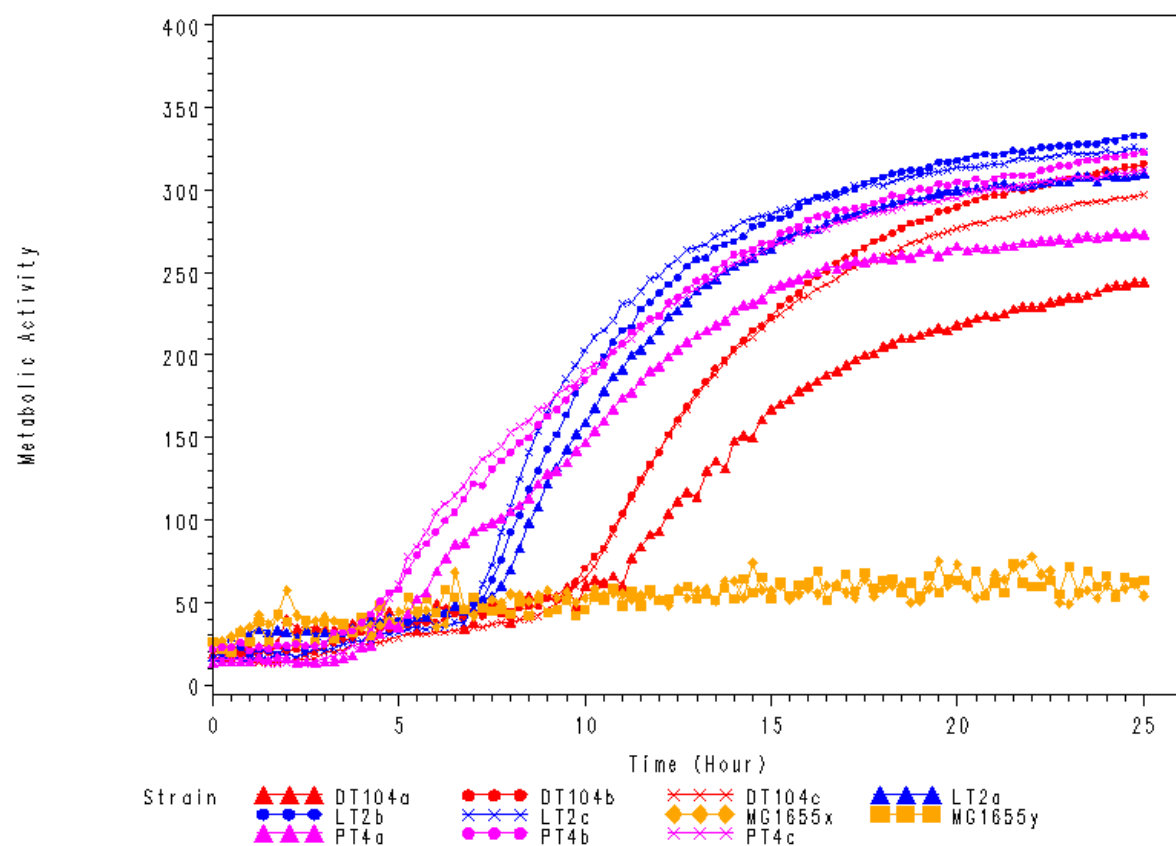

Kinetic Data of Carbon Source Utilisation

PM01, B01 (D-Serine)

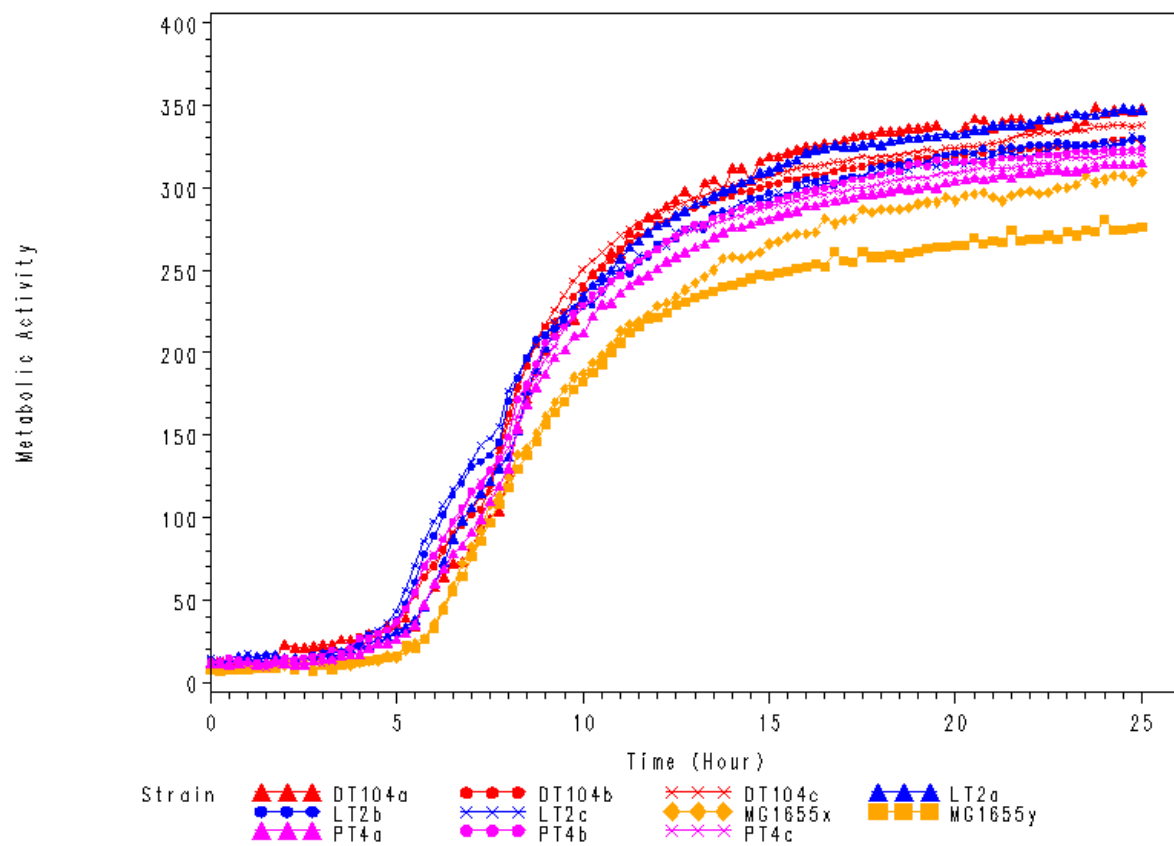

PM01, B02 (D-Sorbitol)

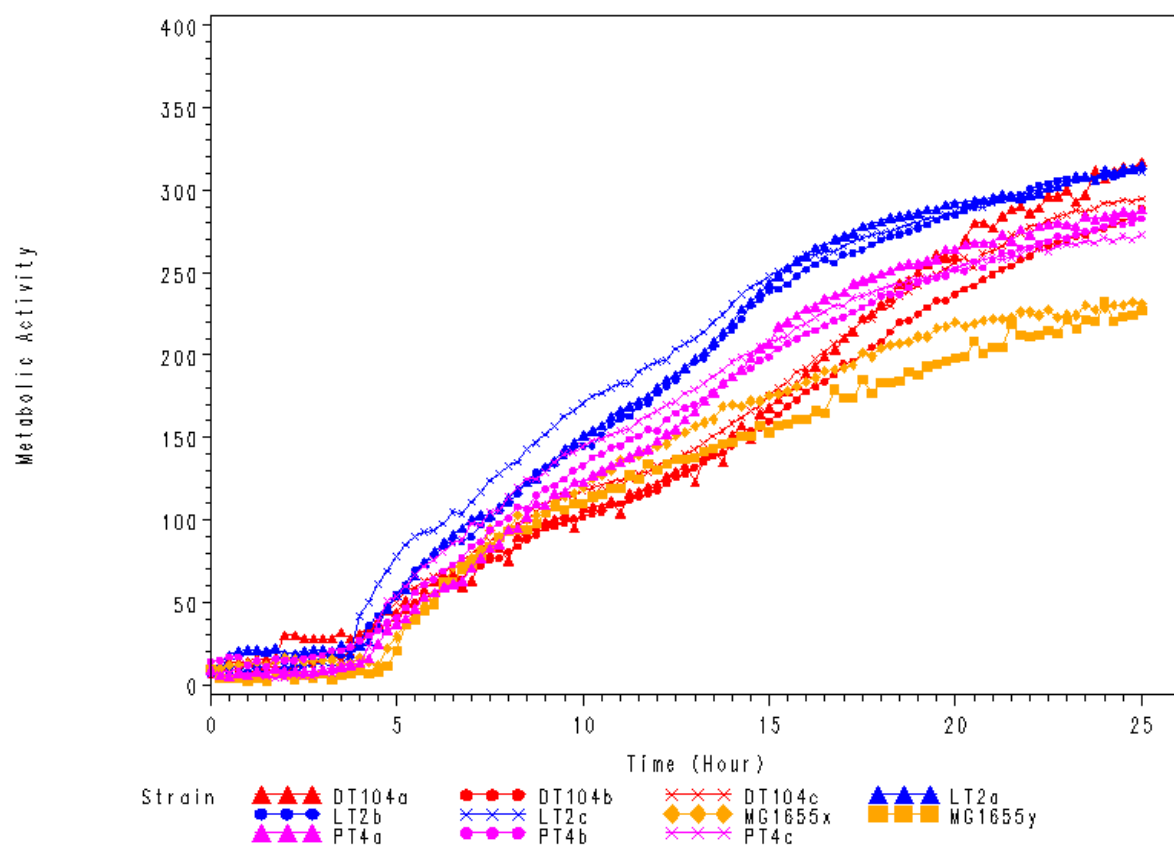

PM01, B03 (Glycerol)

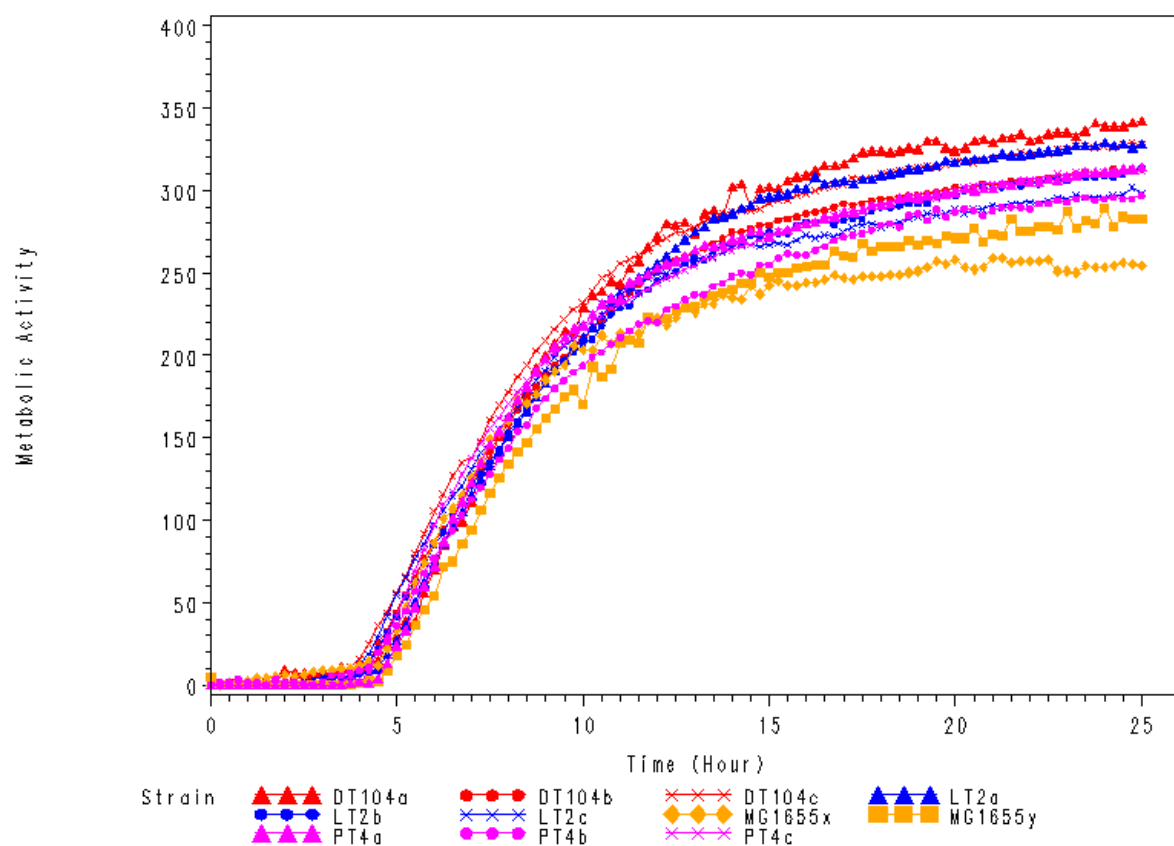

Kinetic Data of Carbon Source Utilisation

PM01, B04 (L-Fucose)

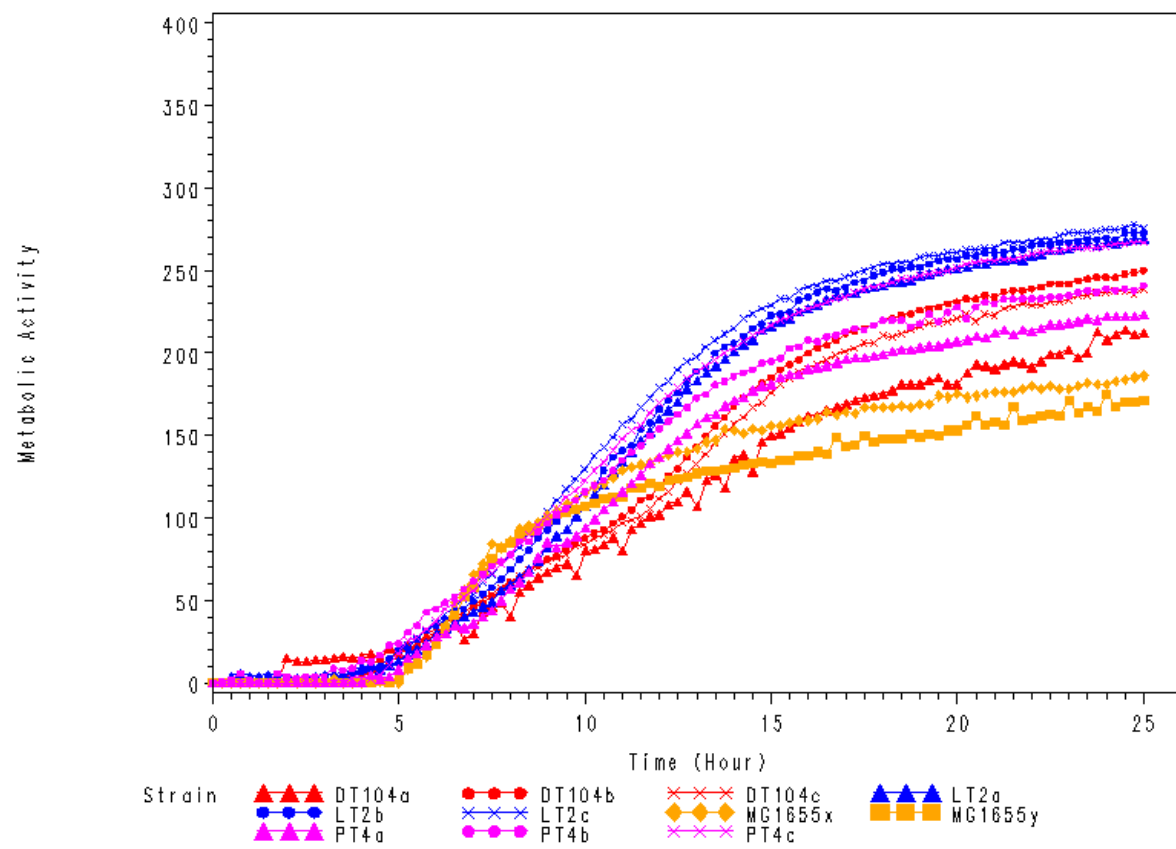

PM01, B05 (D-Glucuronic Acid)

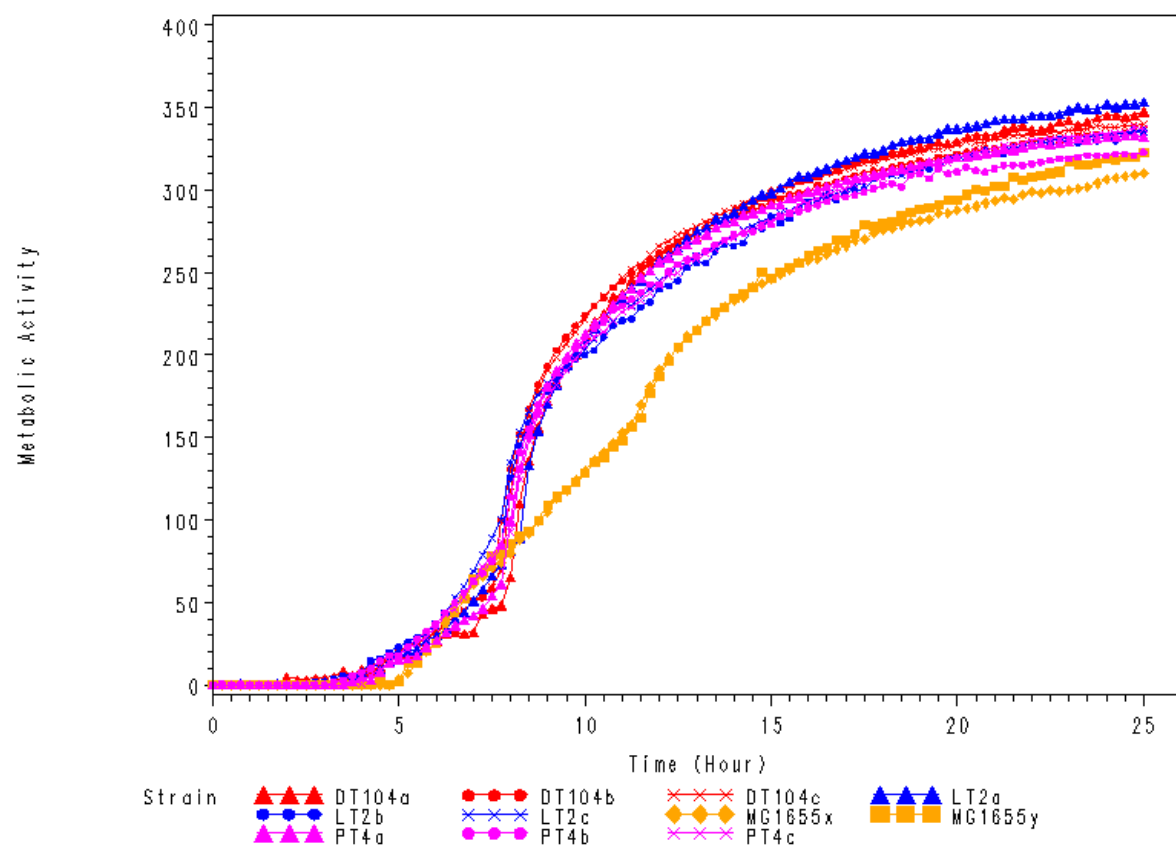

PM01, B06 (D-Gluconic Acid)

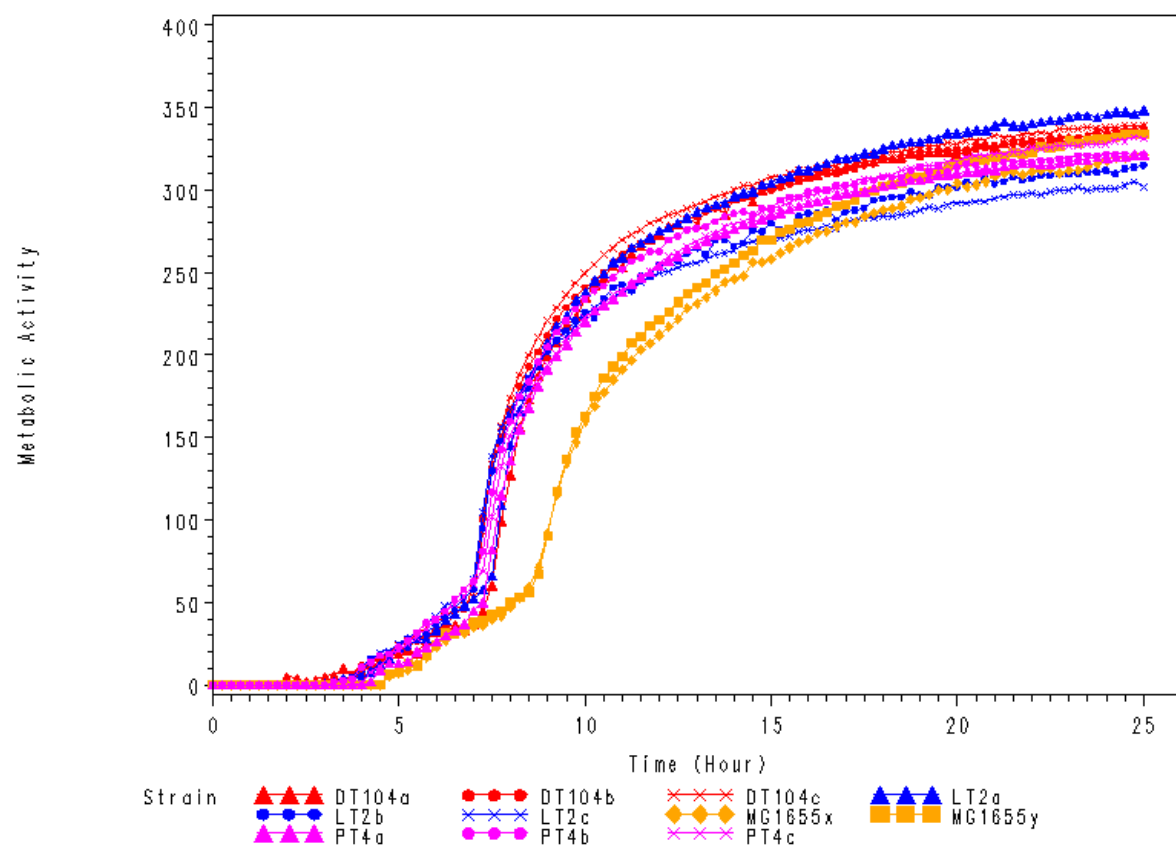

Kinetic Data of Carbon Source Utilisation

PM01, B07 (D,L- $\alpha$ -Glycerol- Phosphate)

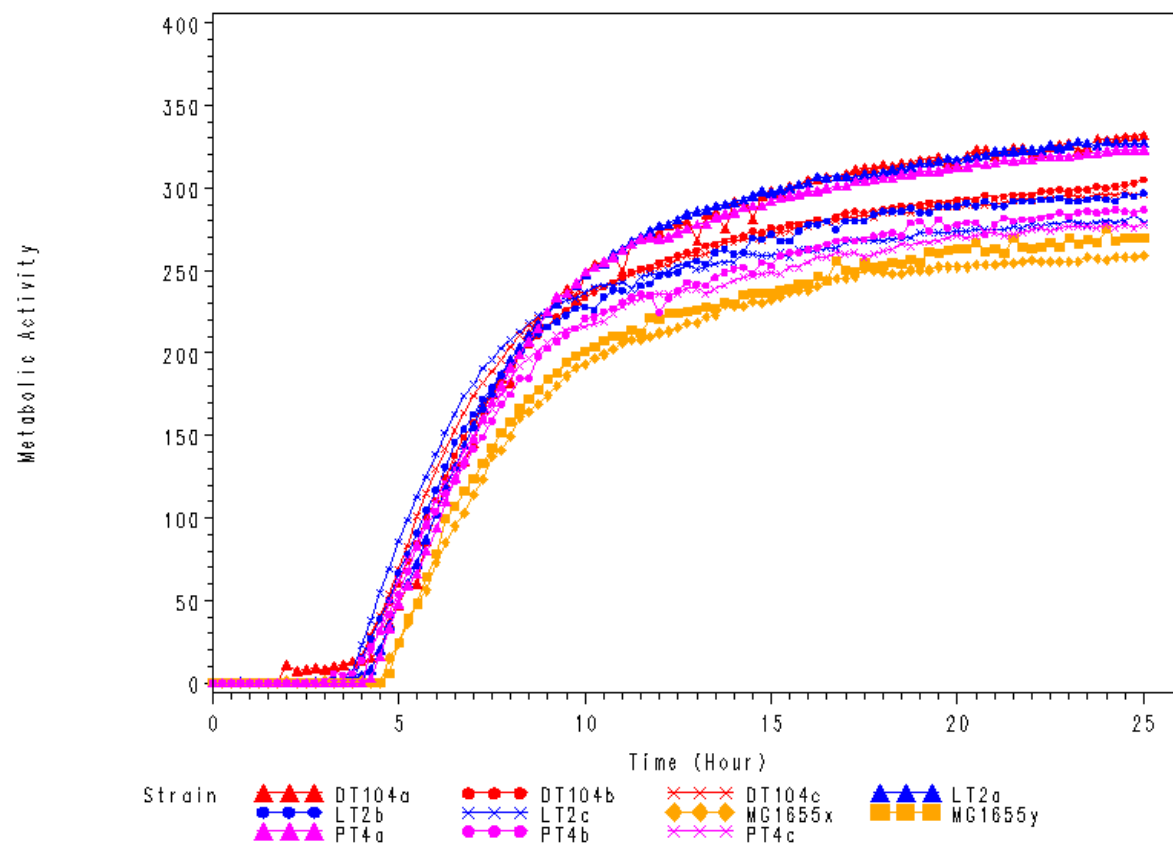

PM01, B08 (D-Xylose)

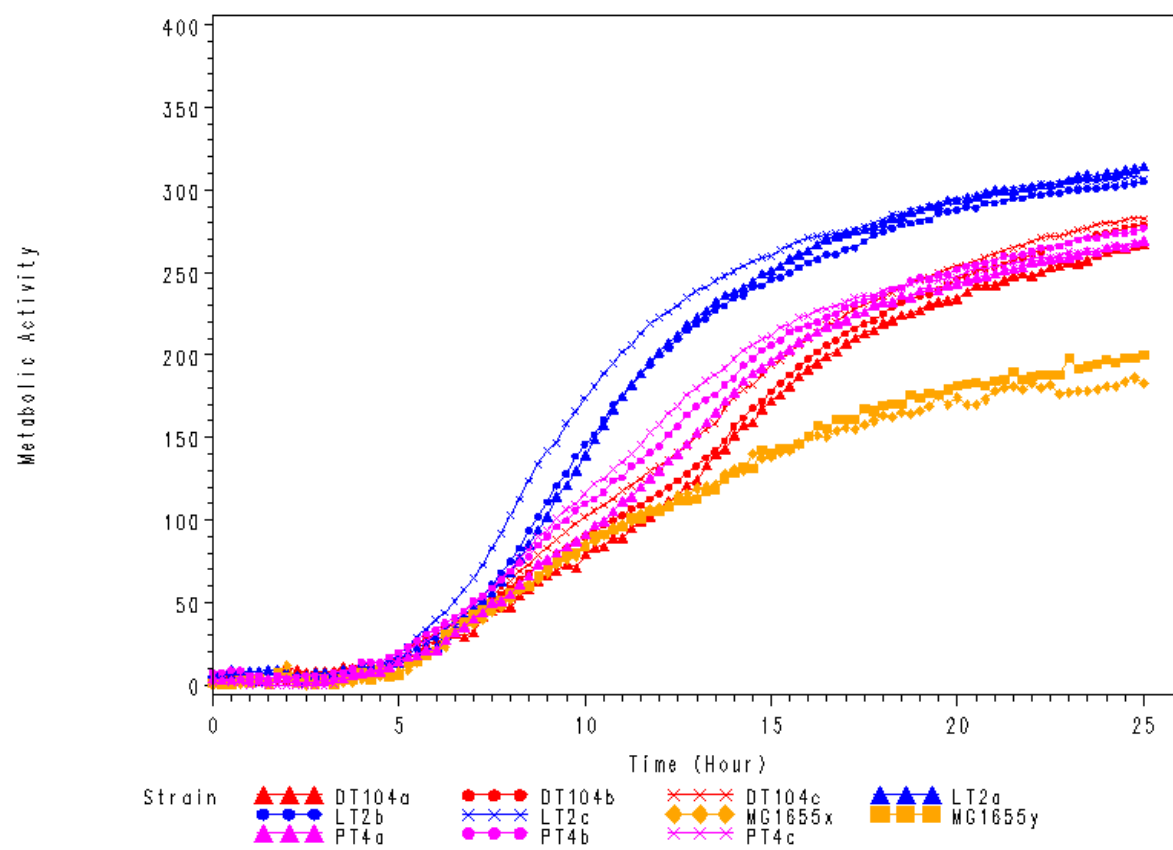

PM01, B09 (L-Lactic Acid)

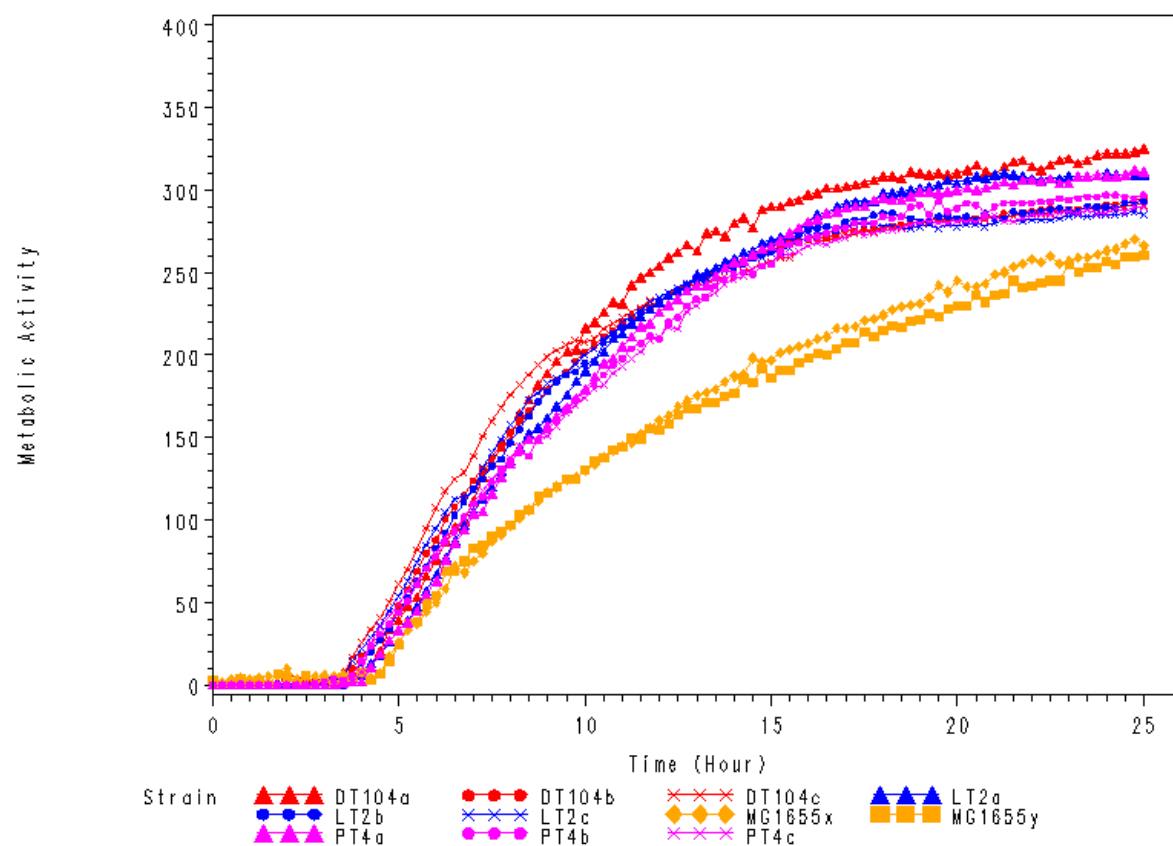

Kinetic Data of Carbon Source Utilisation

PM01, B10 (Formic Acid)

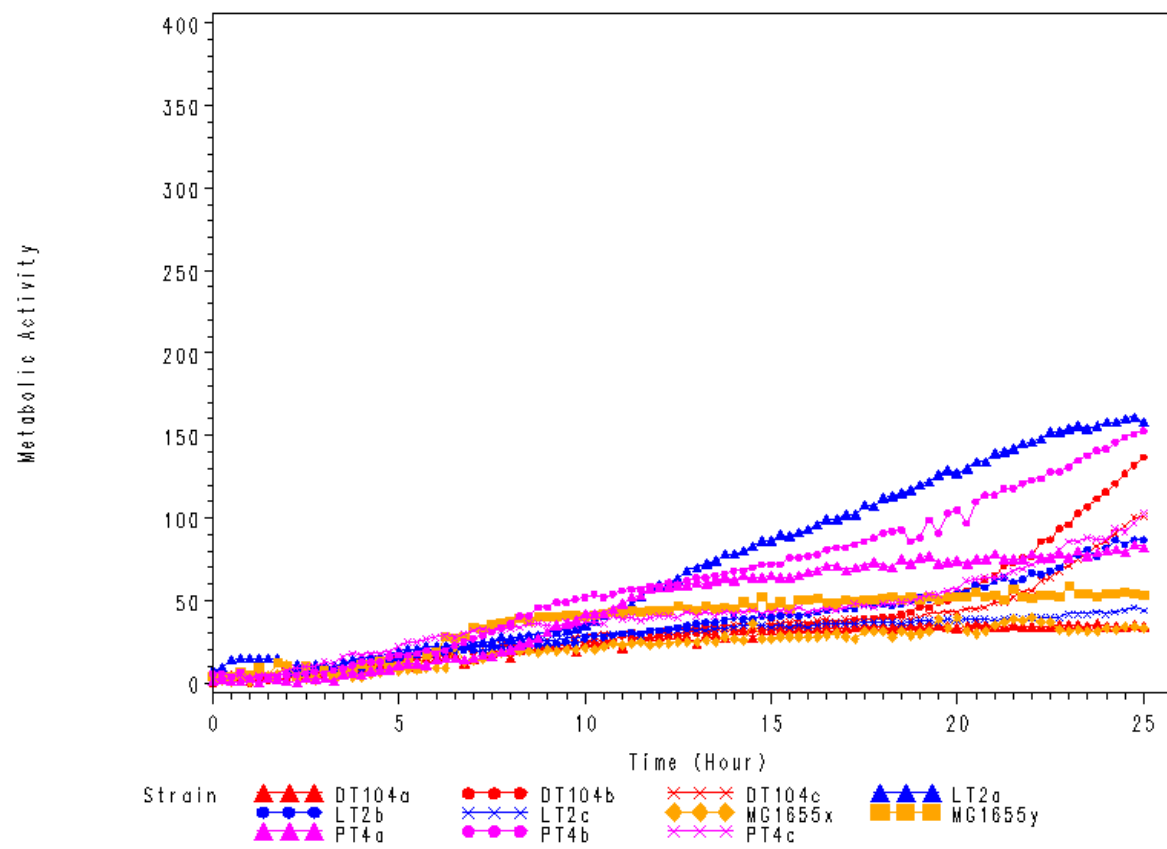

PM01, B11 (D-Mannitol)

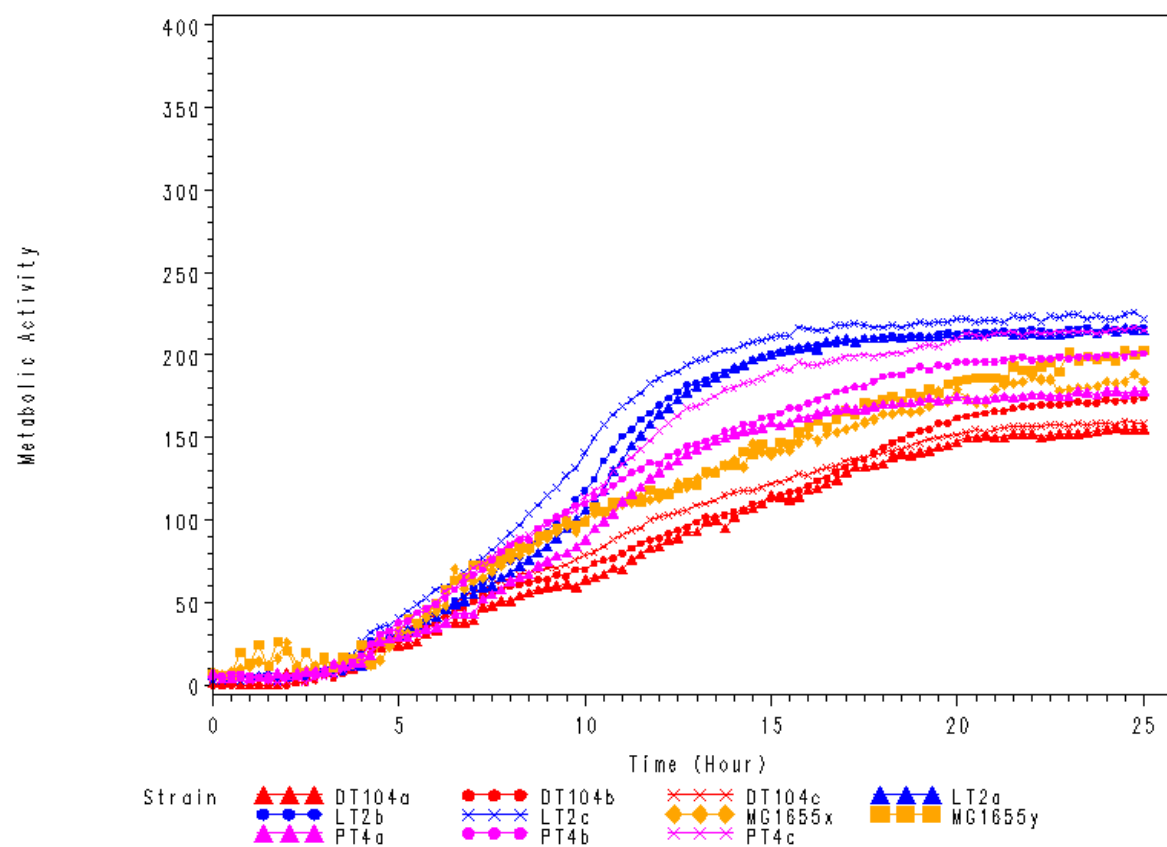

PM01, B12 (L-Glutamic Acid)

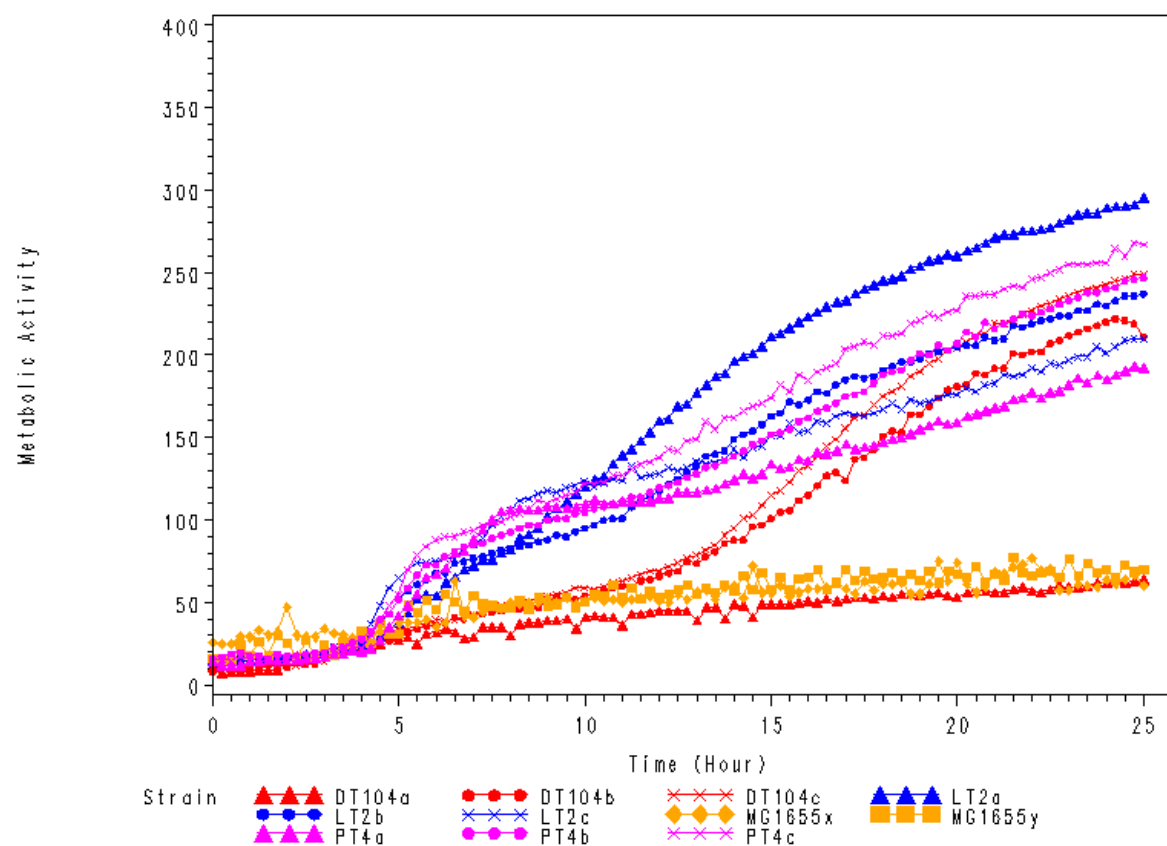



Kinetic Data of Carbon Source Utilisation

PM01, C01 (D-Glucose-6-Phosphate)

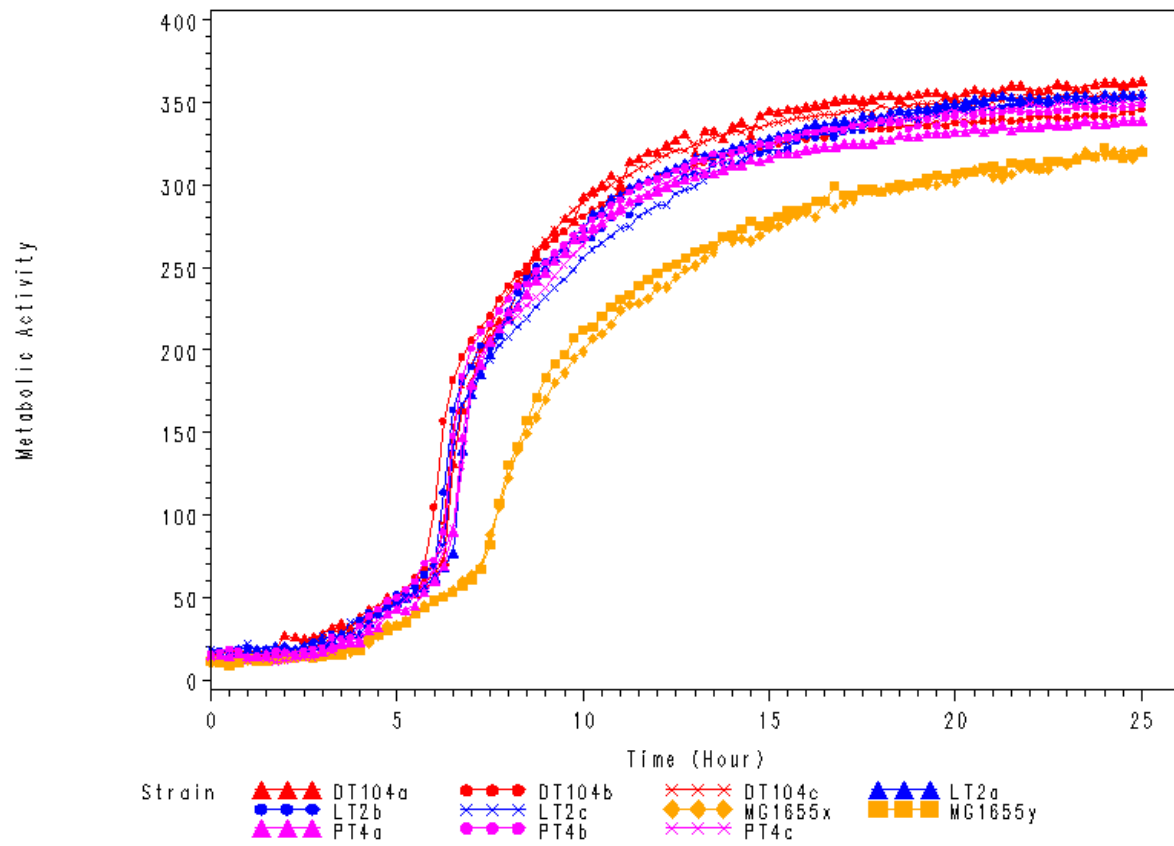

PM01, C02 (D-Galactonic Acid-g-Lactone)

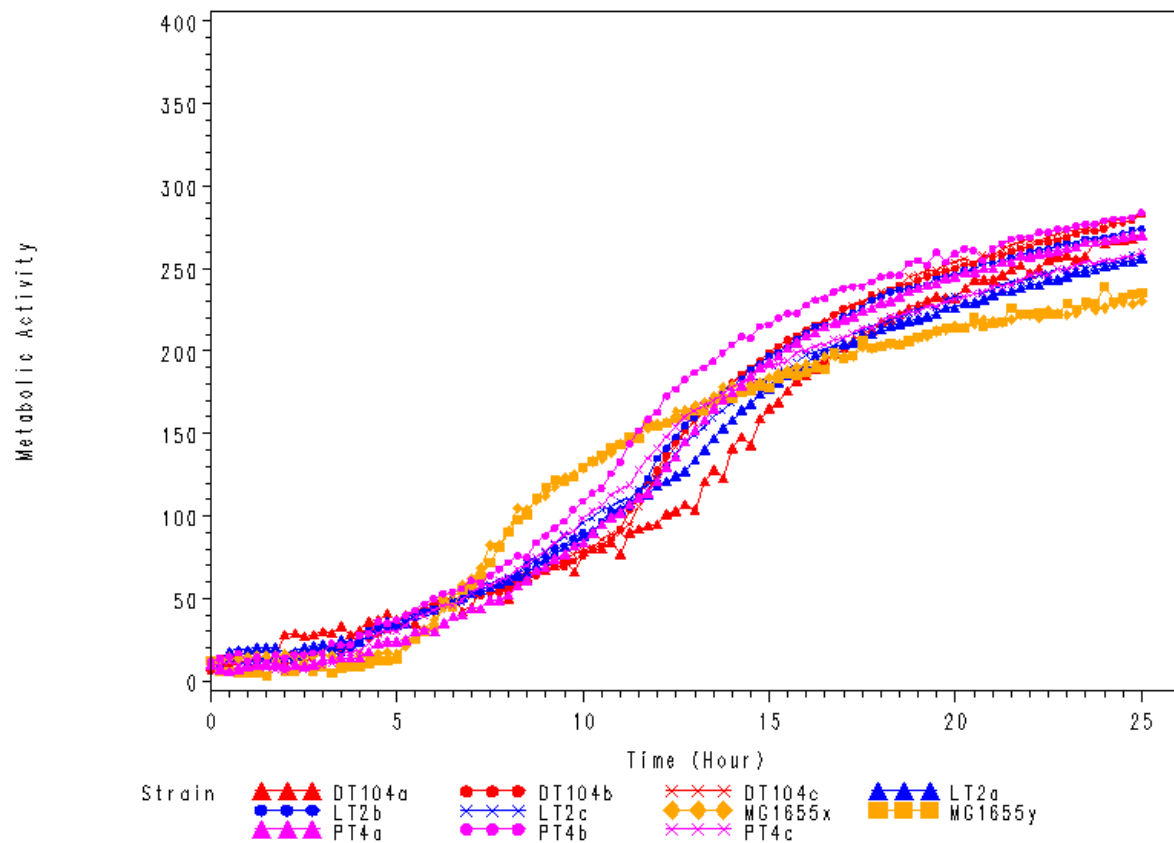

PM01, C03 (D,L-Malic Acid)

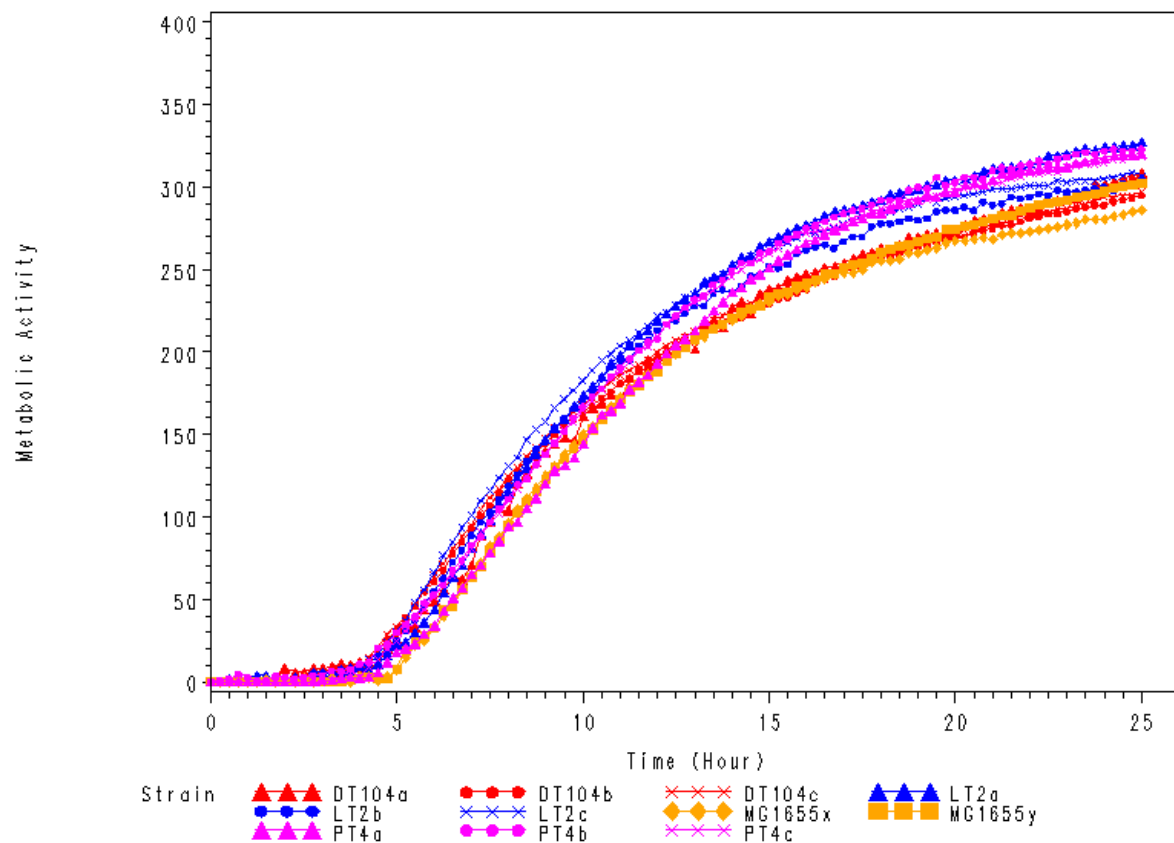

Kinetic Data of Carbon Source Utilisation

PM01, C04 (D-Ribose)

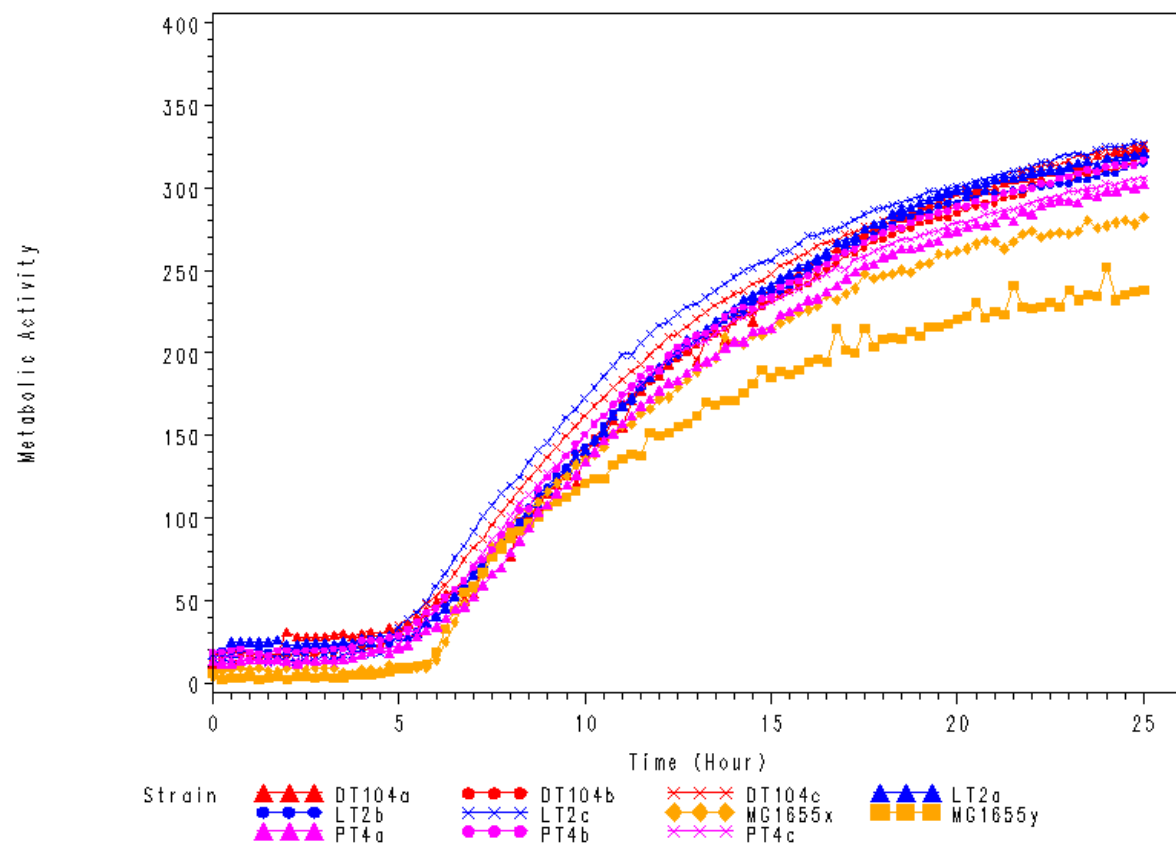

PM01, C05 (Tween 20)

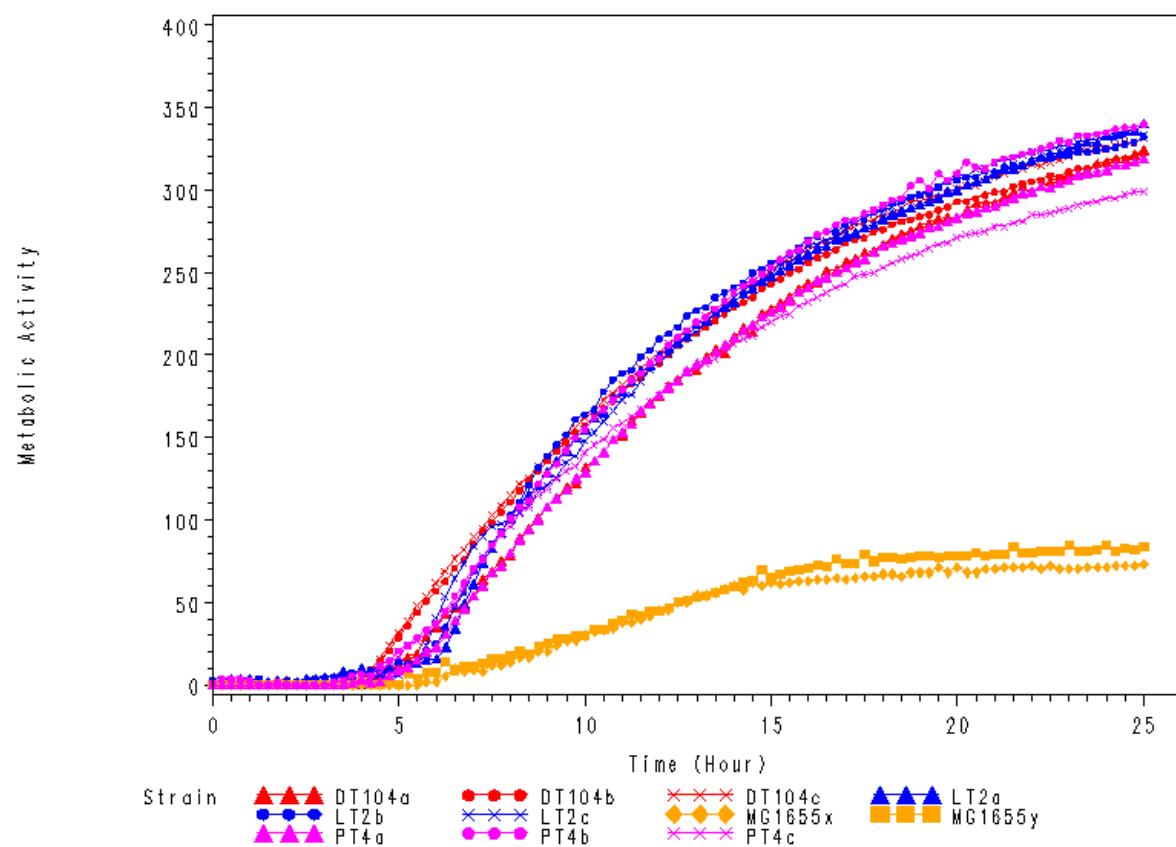

PM01, C06 (L-Rhamnose)

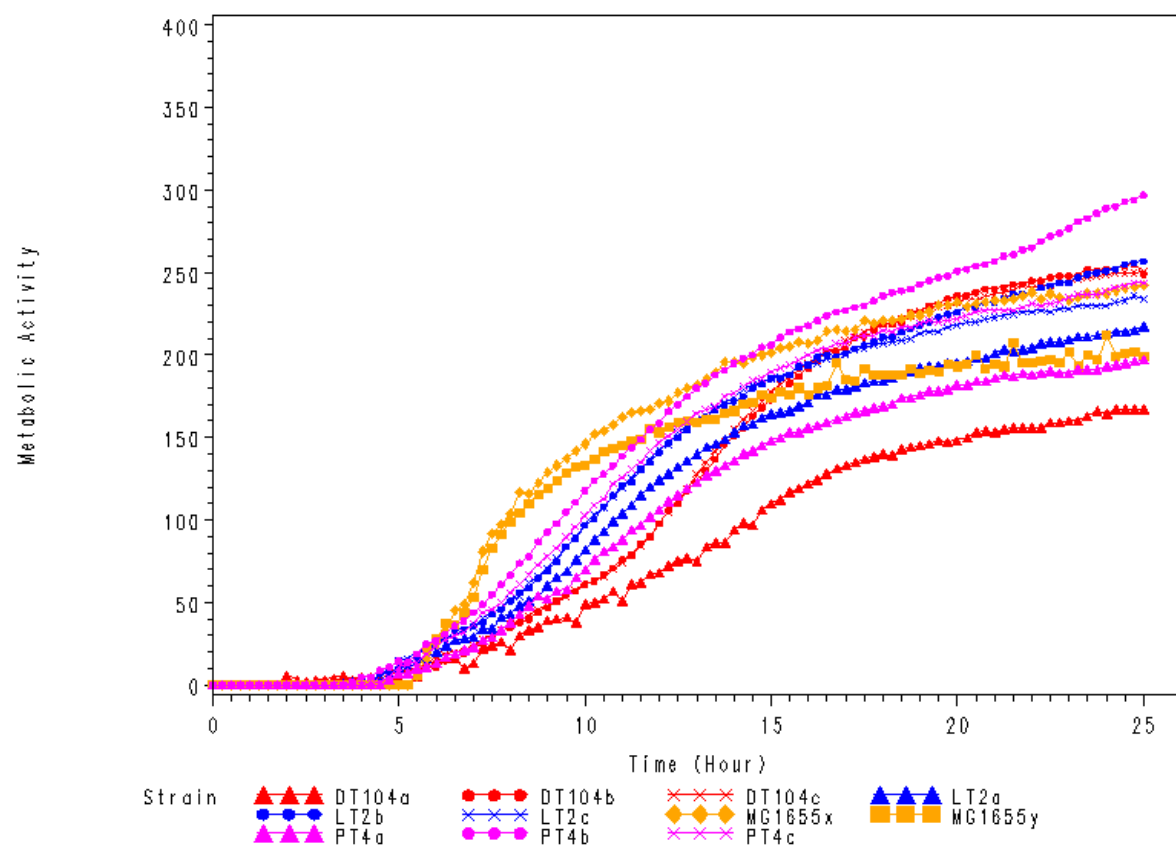

Kinetic Data of Carbon Source Utilisation

PM01, C07 (D-Fructose)

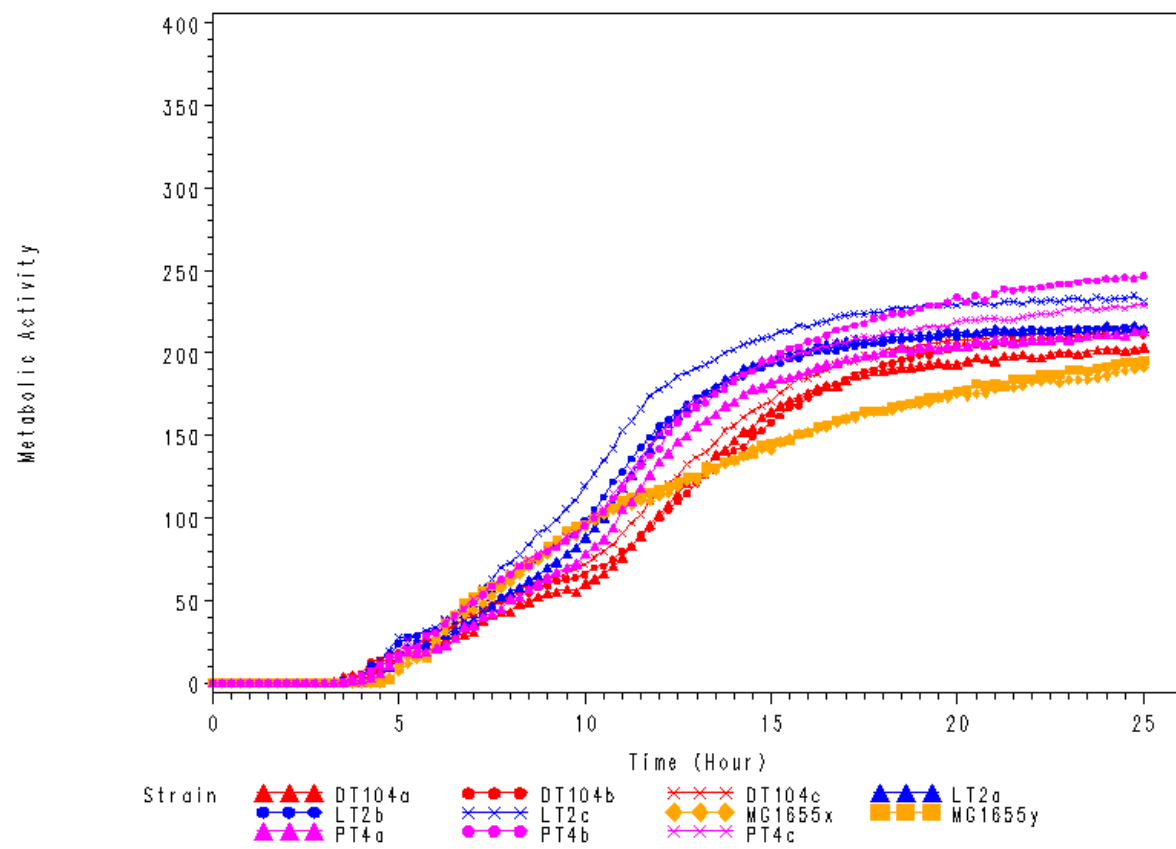

PM01, C08 (Acetic Acid)

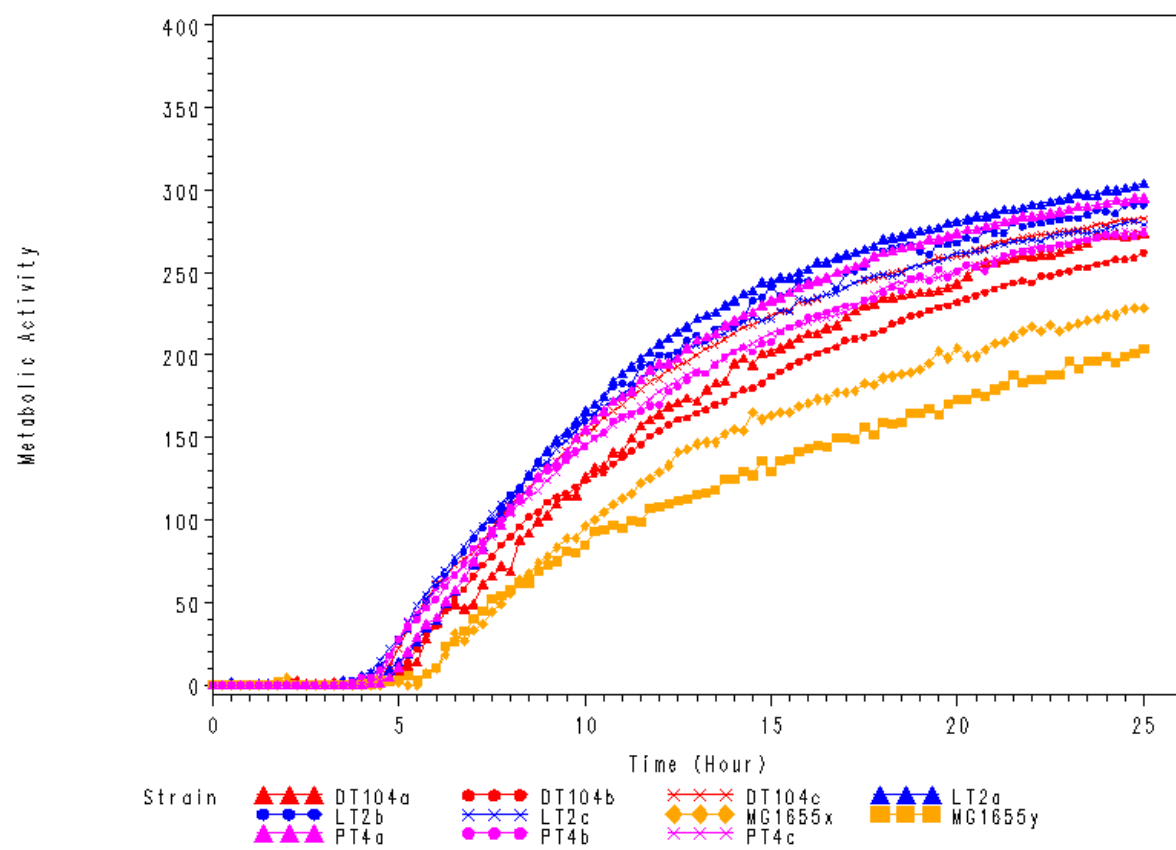

PM01, C09 (α-D-Glucose)

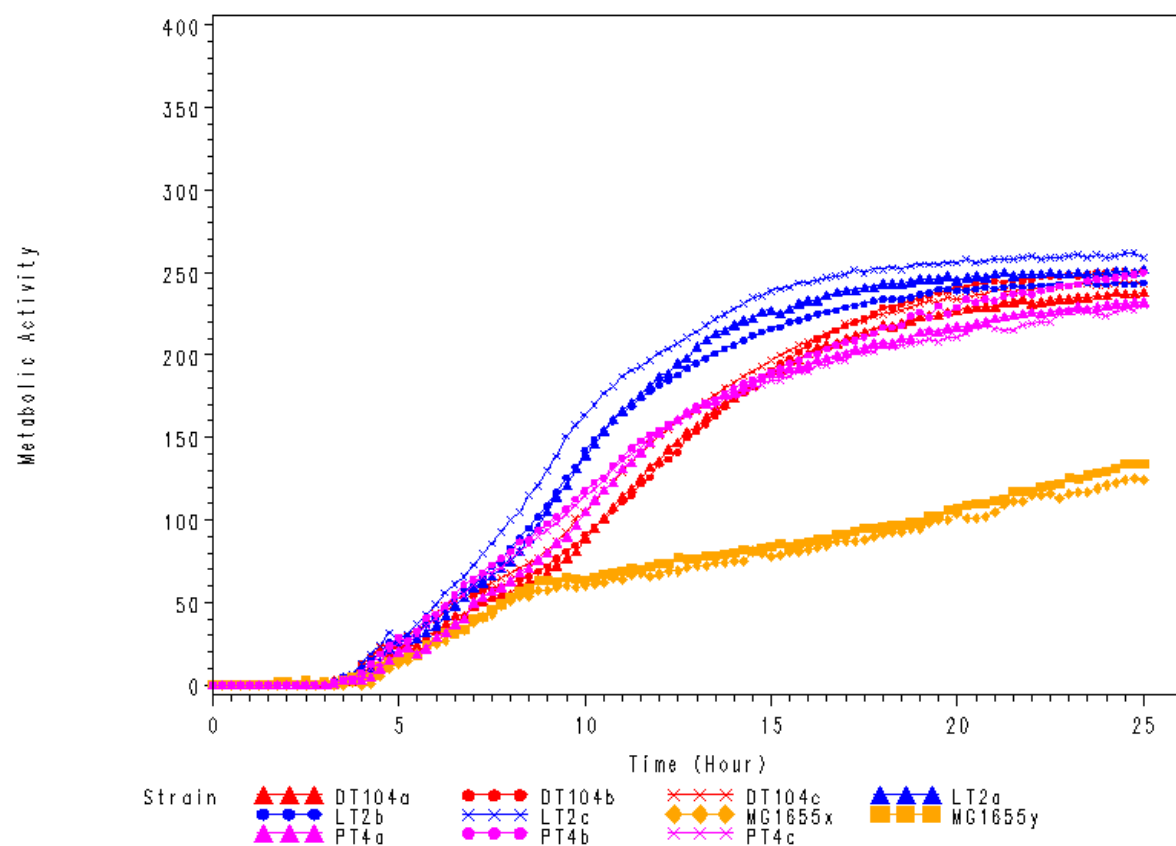

Kinetic Data of Carbon Source Utilisation

PM01, C10 (Maltose)

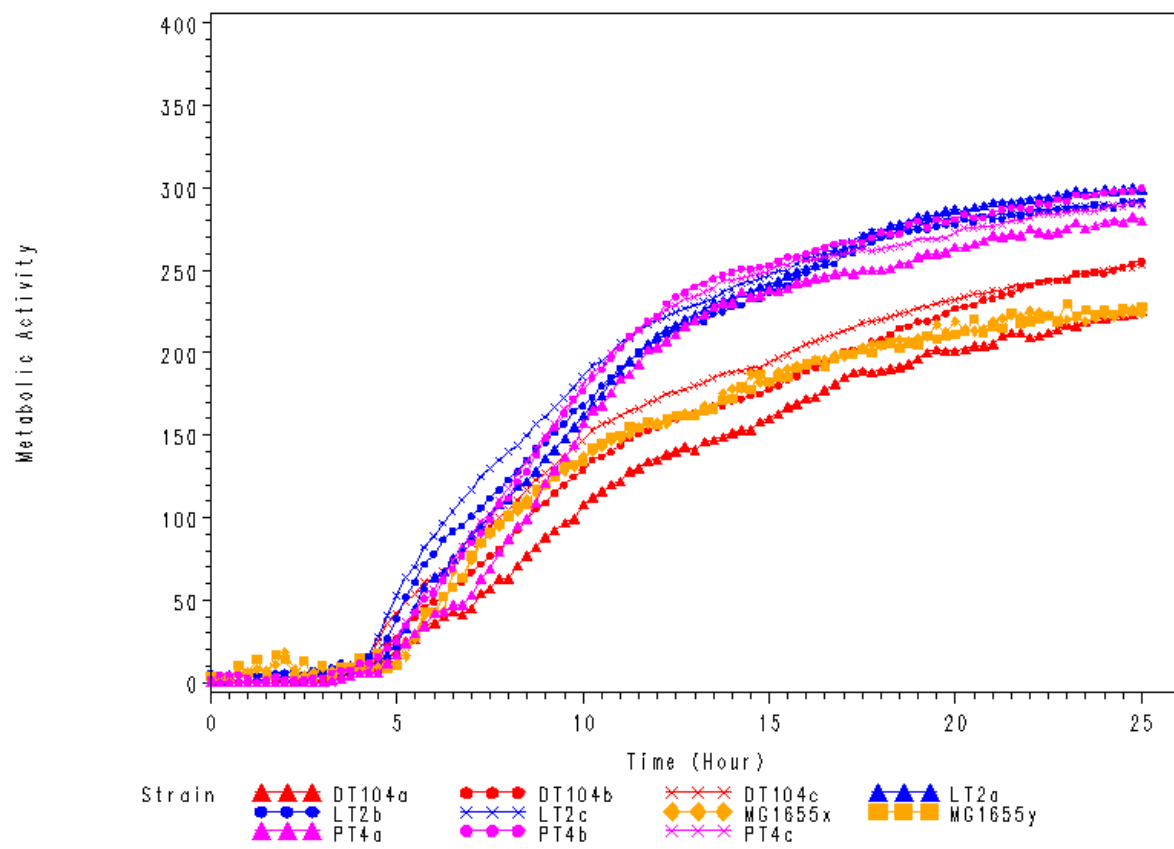

PM01, C11 (D-Melibiose)

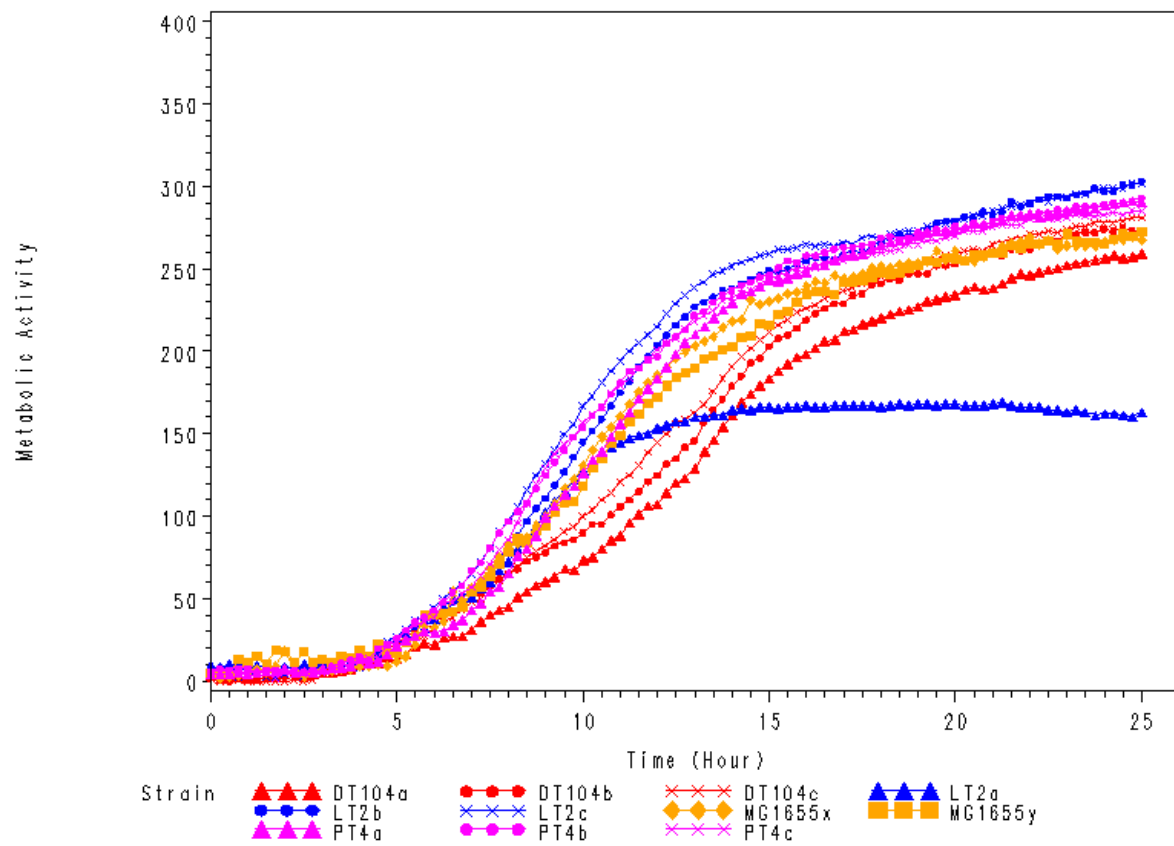

PM01, C12 (Thymidine)

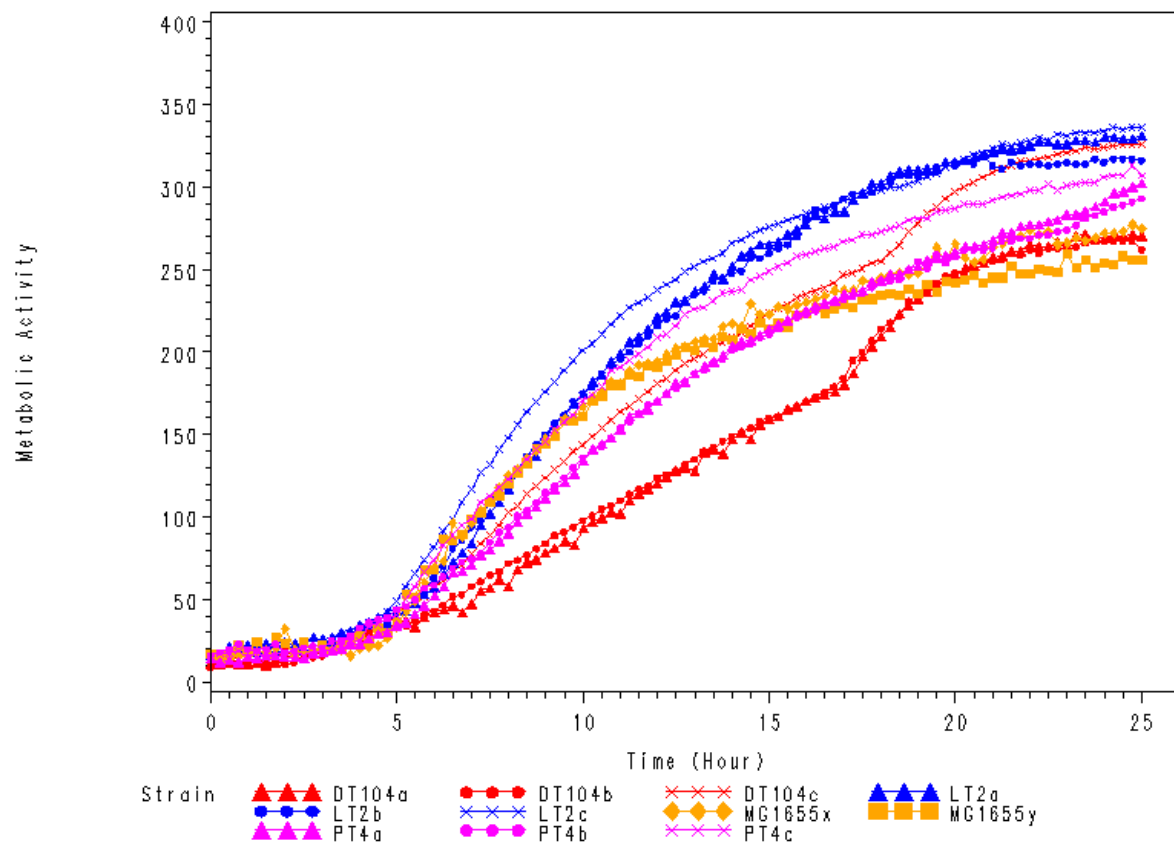

Kinetic Data of Carbon Source Utilisation

PM01, D01 (L-Asparagine)

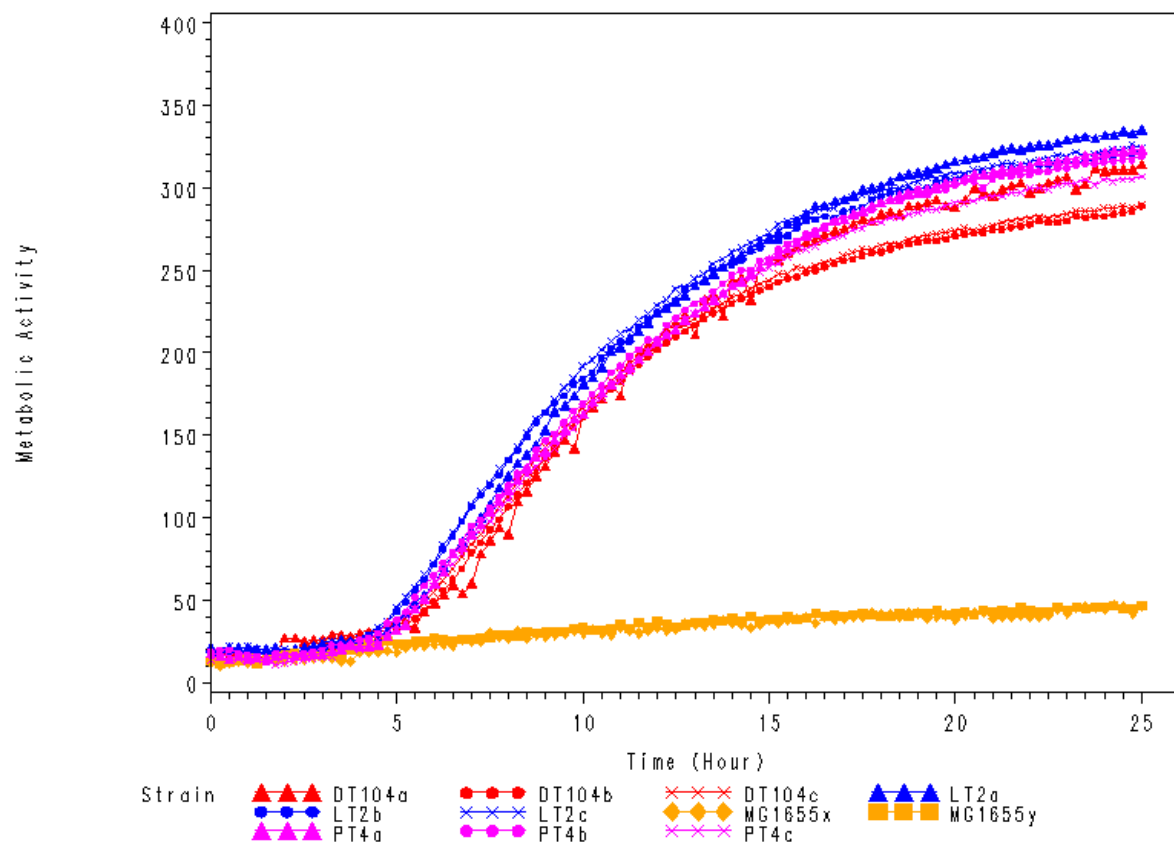

PM01, D02 (D-Aspartic Acid)

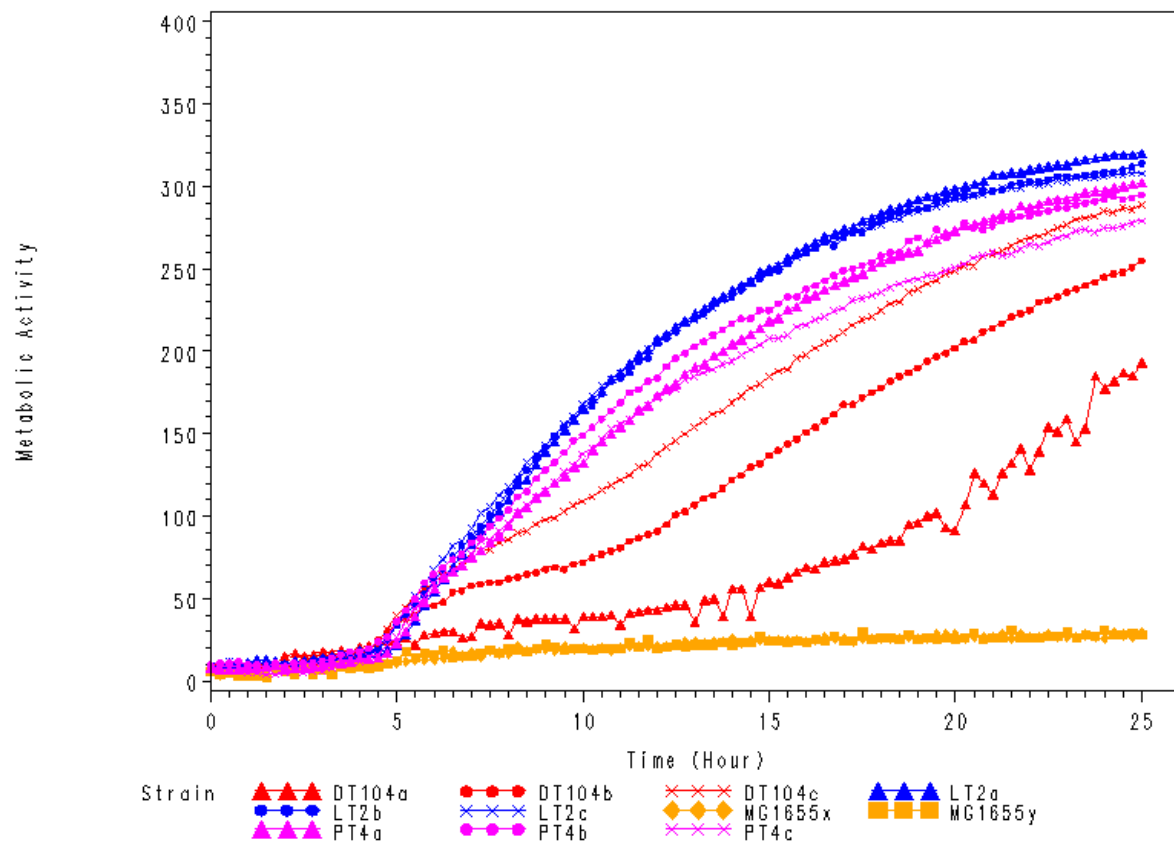

PM01, D03 (D-Glucosaminic Acid)

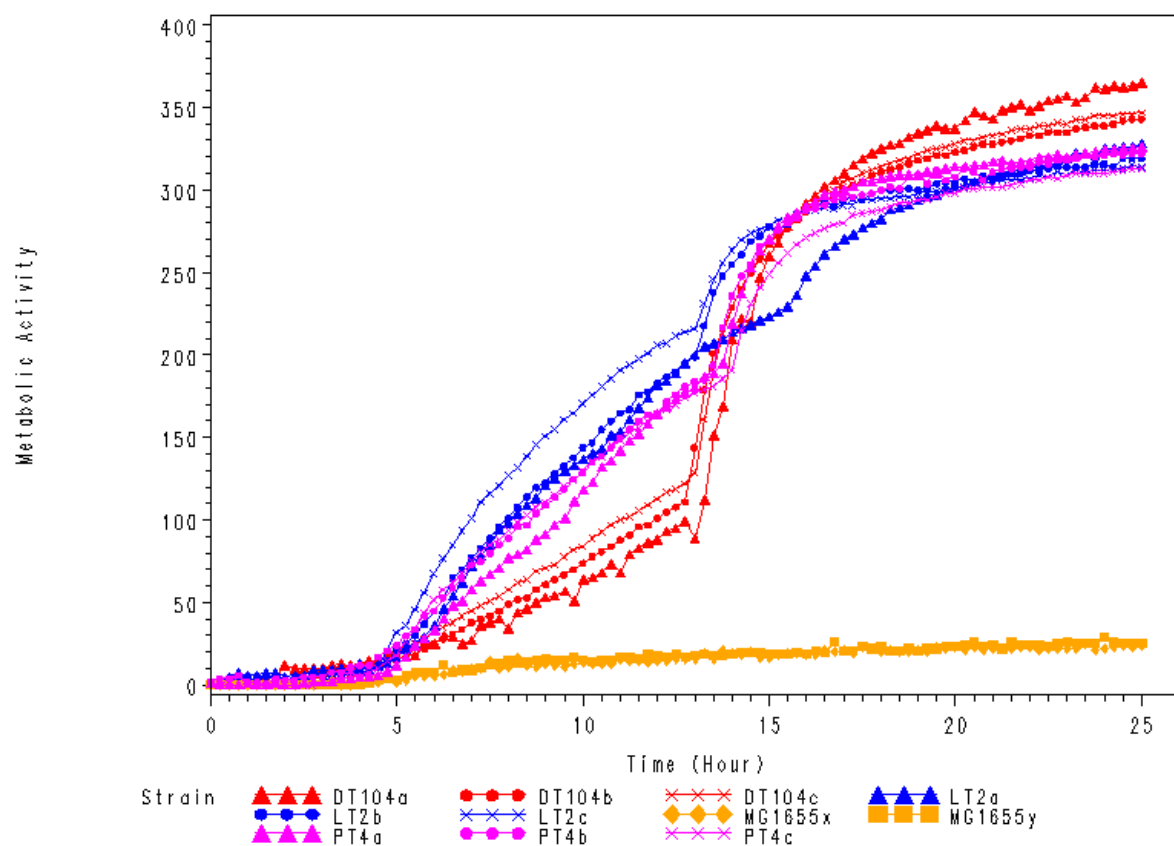

Kinetic Data of Carbon Source Utilisation

PM01, D04 (1,2-Propanediol)

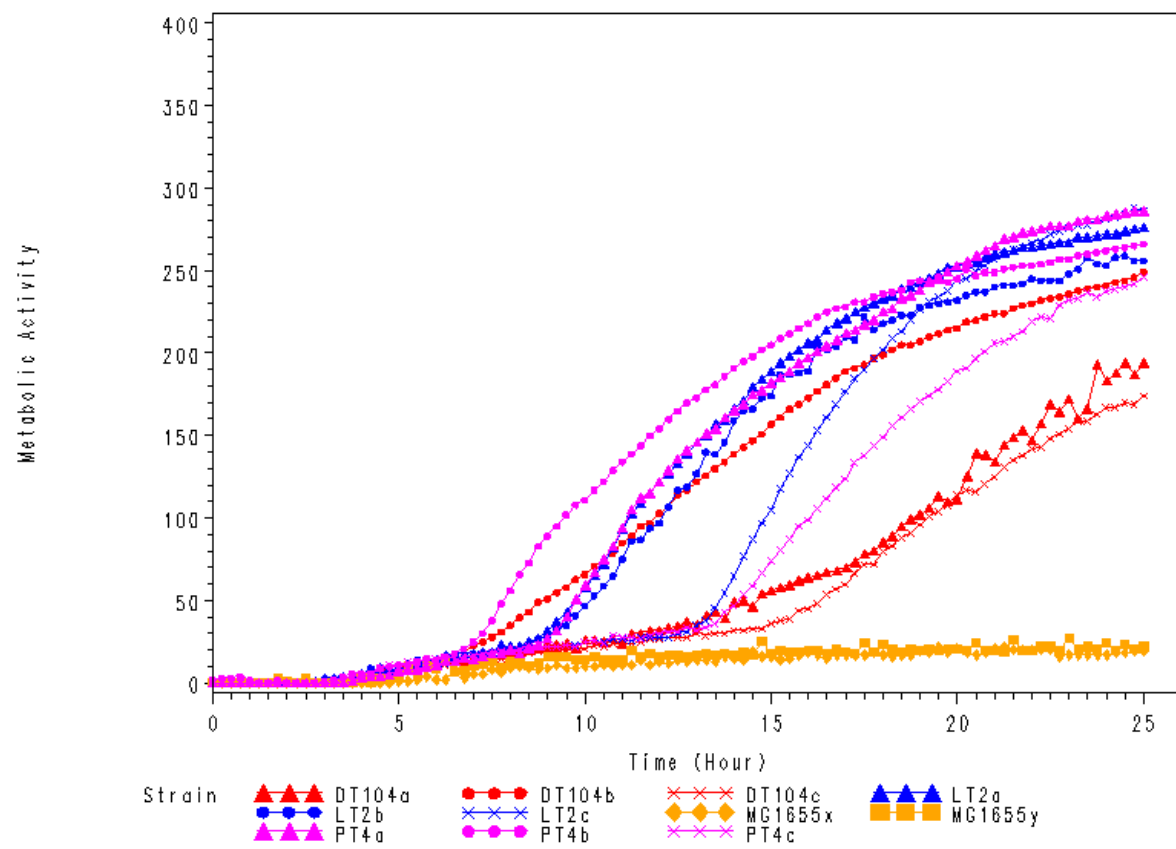

PM01, D05 (Tween 40)

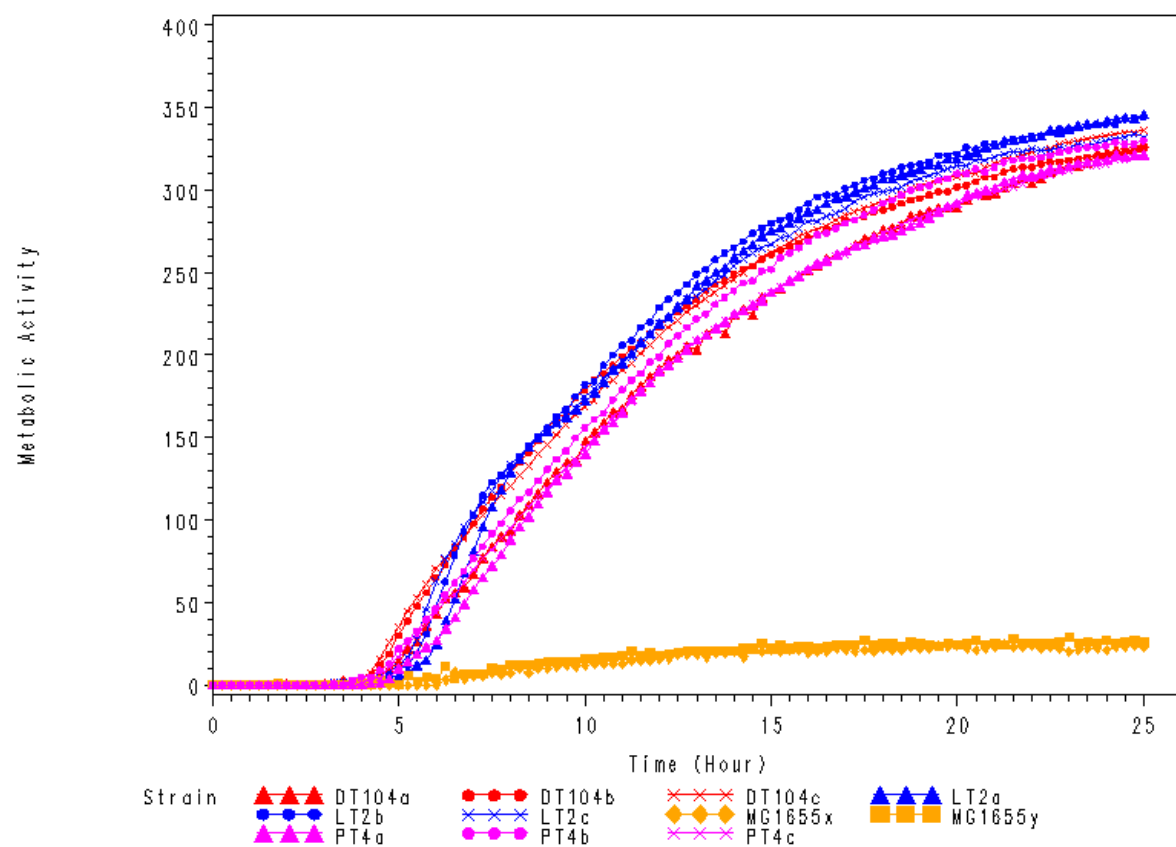

PM01, D06 (α-Keto-Glutaric Acid)

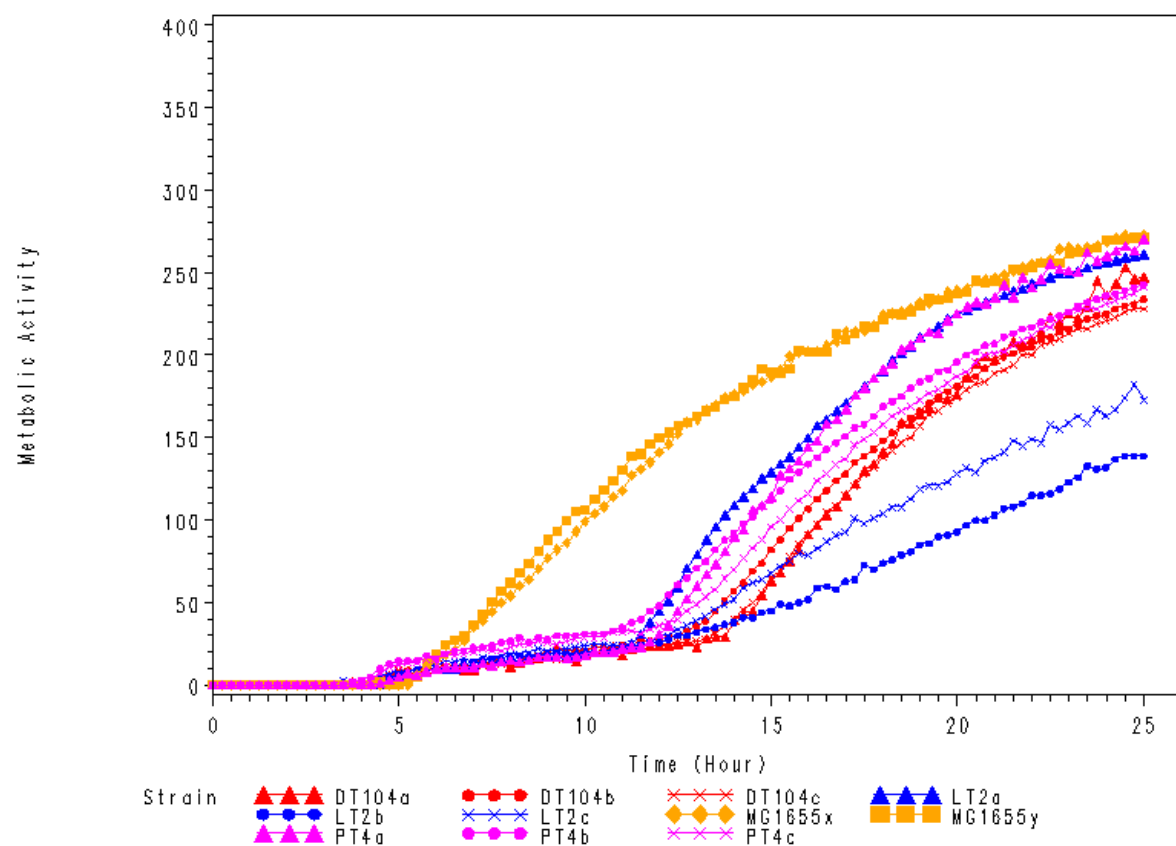

Kinetic Data of Carbon Source Utilisation

PM01, D07 ( $\alpha$ -Keto-Butyric Acid)

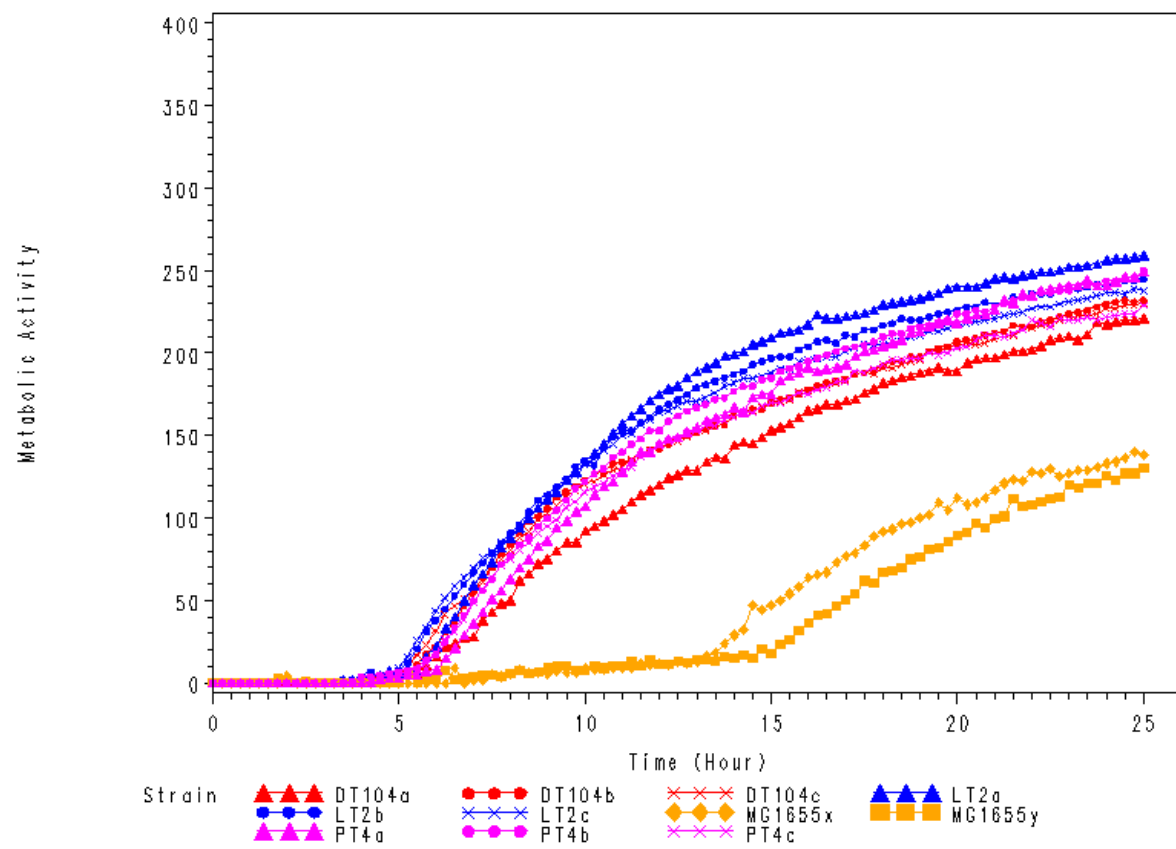

PM01, D08 ( $\alpha$ -Methyl-D-Galactoside)

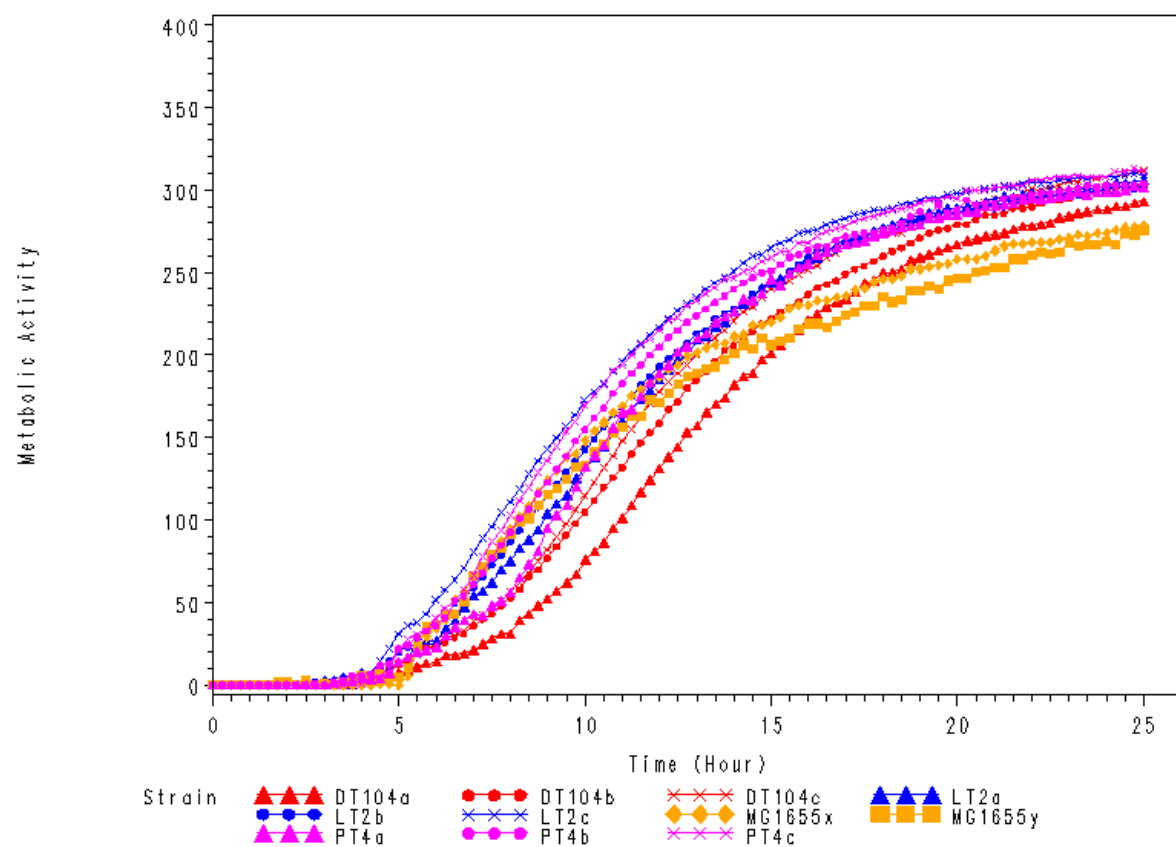

PM01, D09 ( $\alpha$ -D-Lactose)

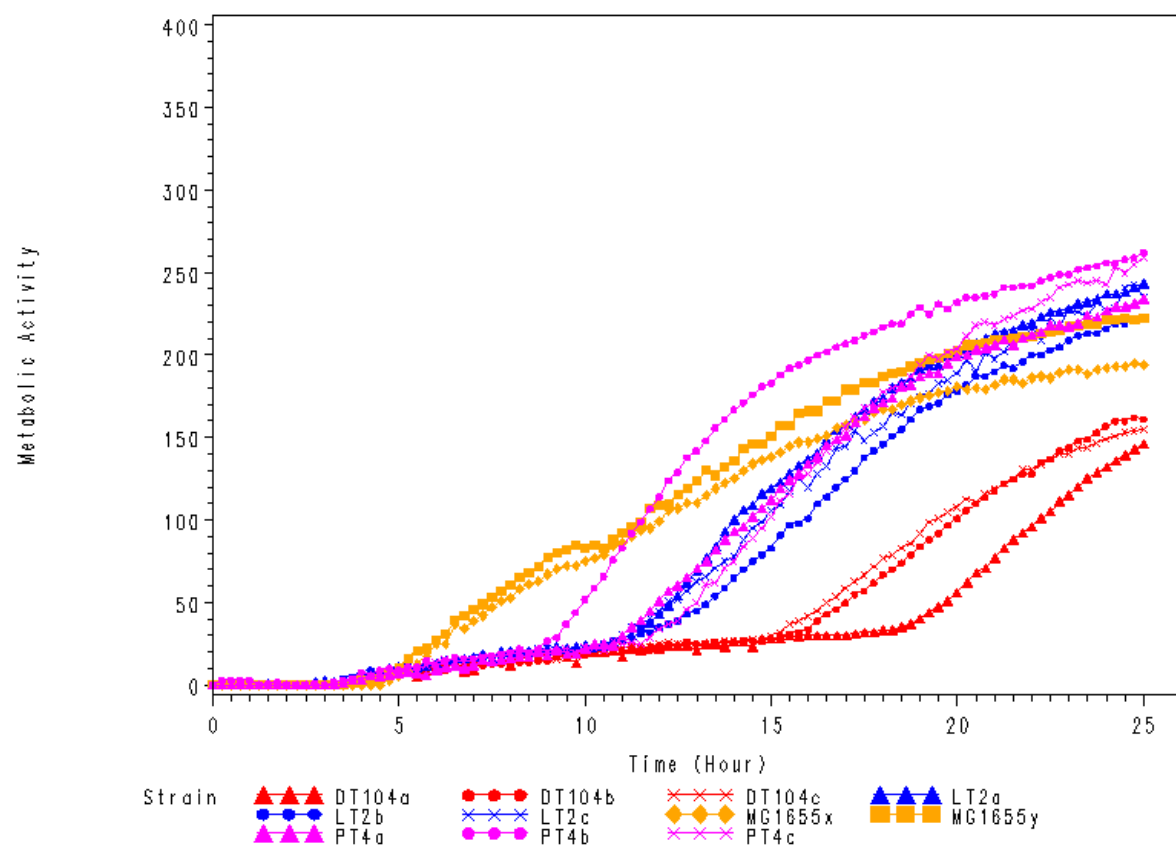

Kinetic Data of Carbon Source Utilisation

PM01, D10 (Lactulose)

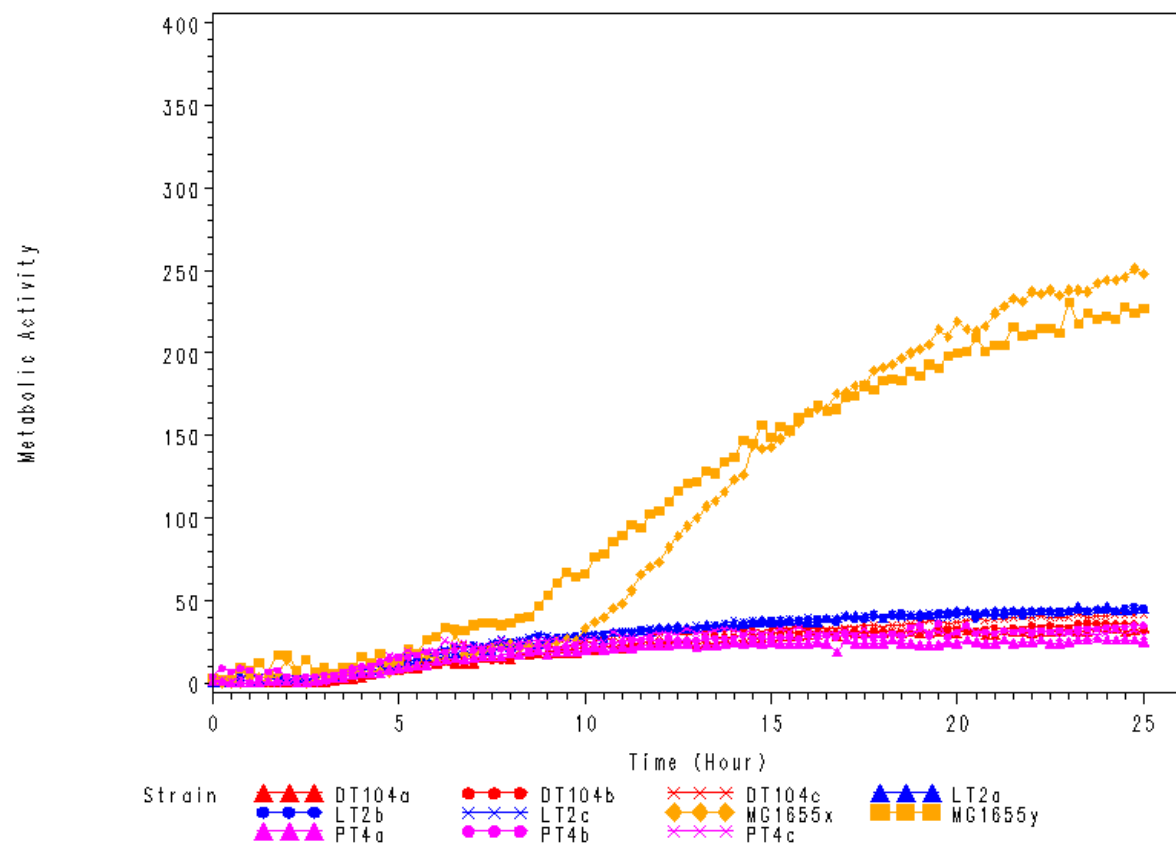

PM01, D11 (Sucrose)

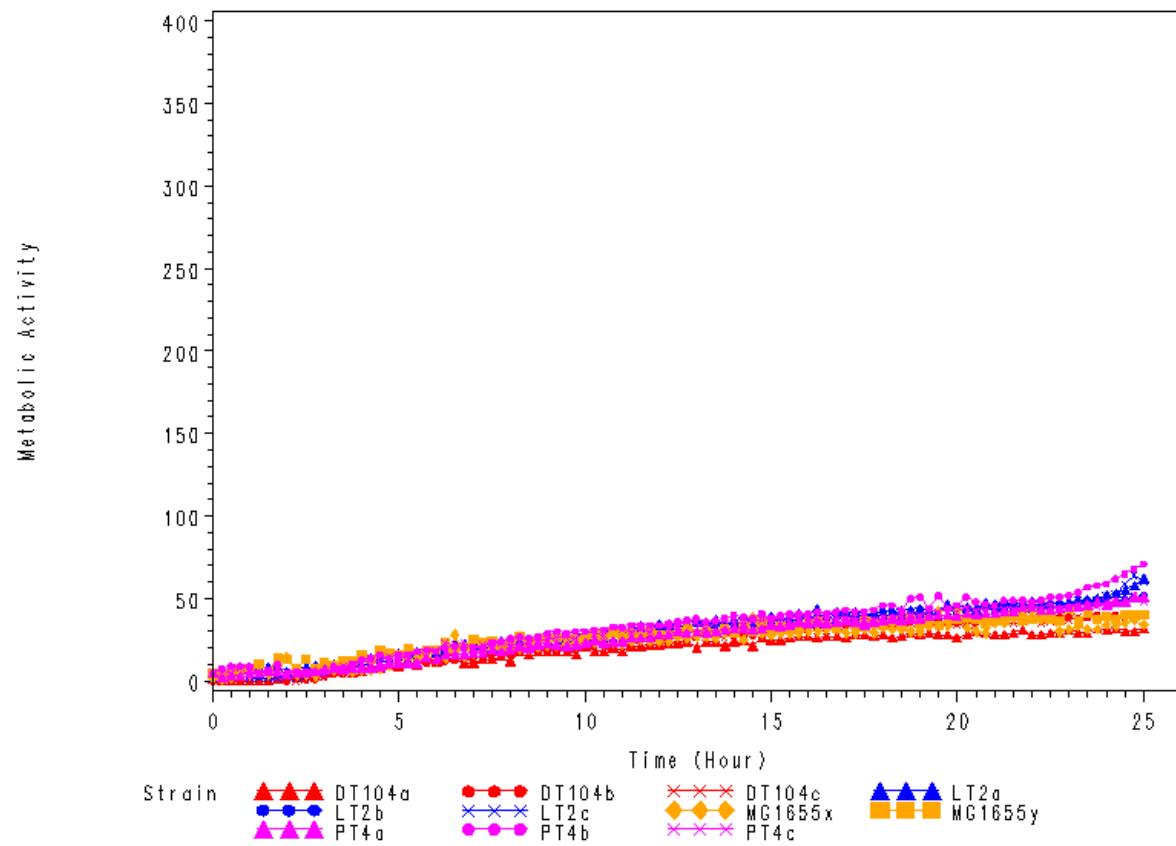

PM01, D12 (Uridine)

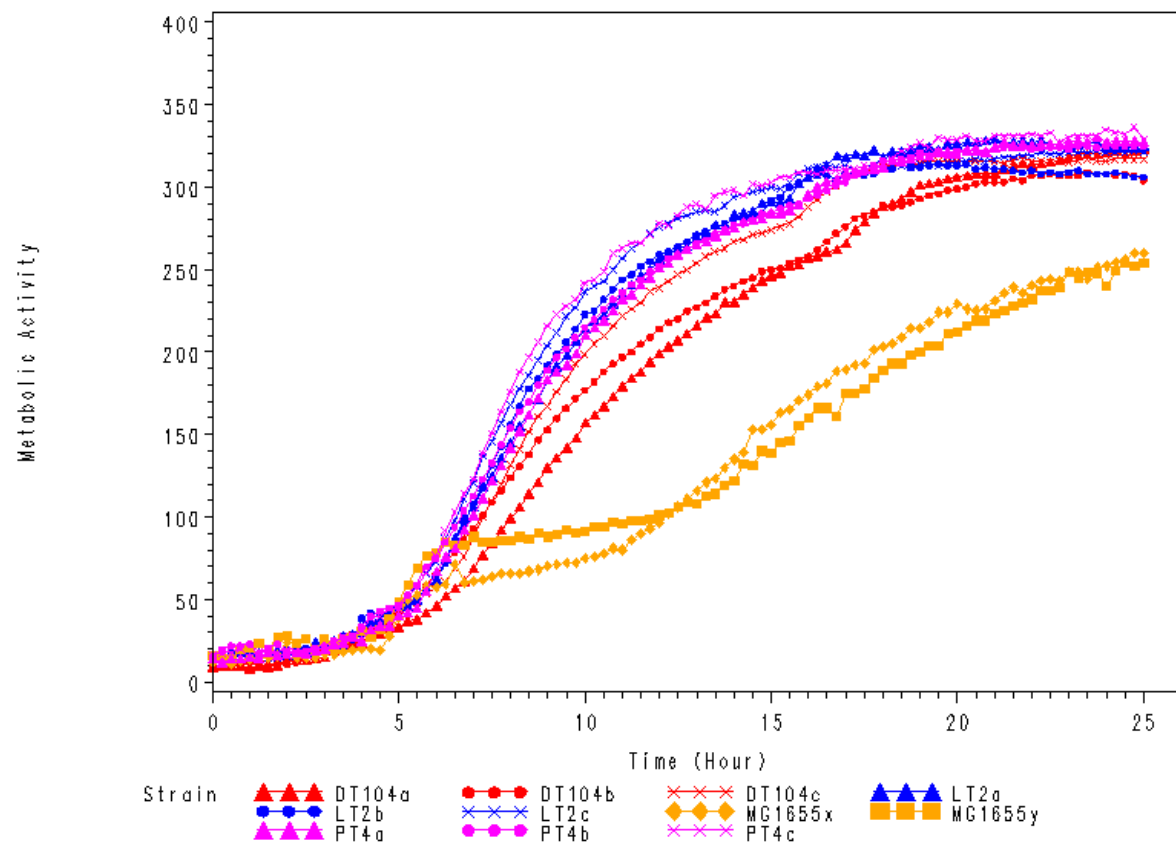



Kinetic Data of Carbon Source Utilisation

PM01, E01 (L-Glutamine)

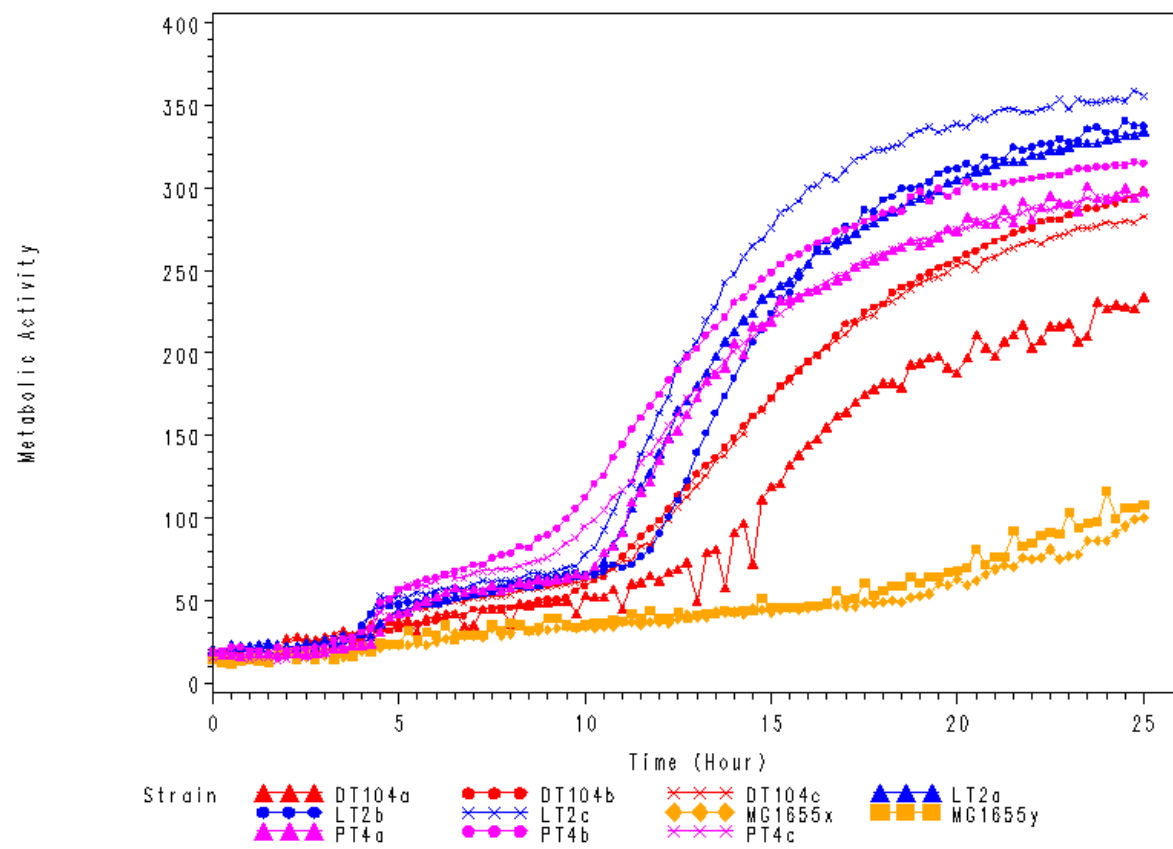

PM01, E02 (m-Tartaric Acid)

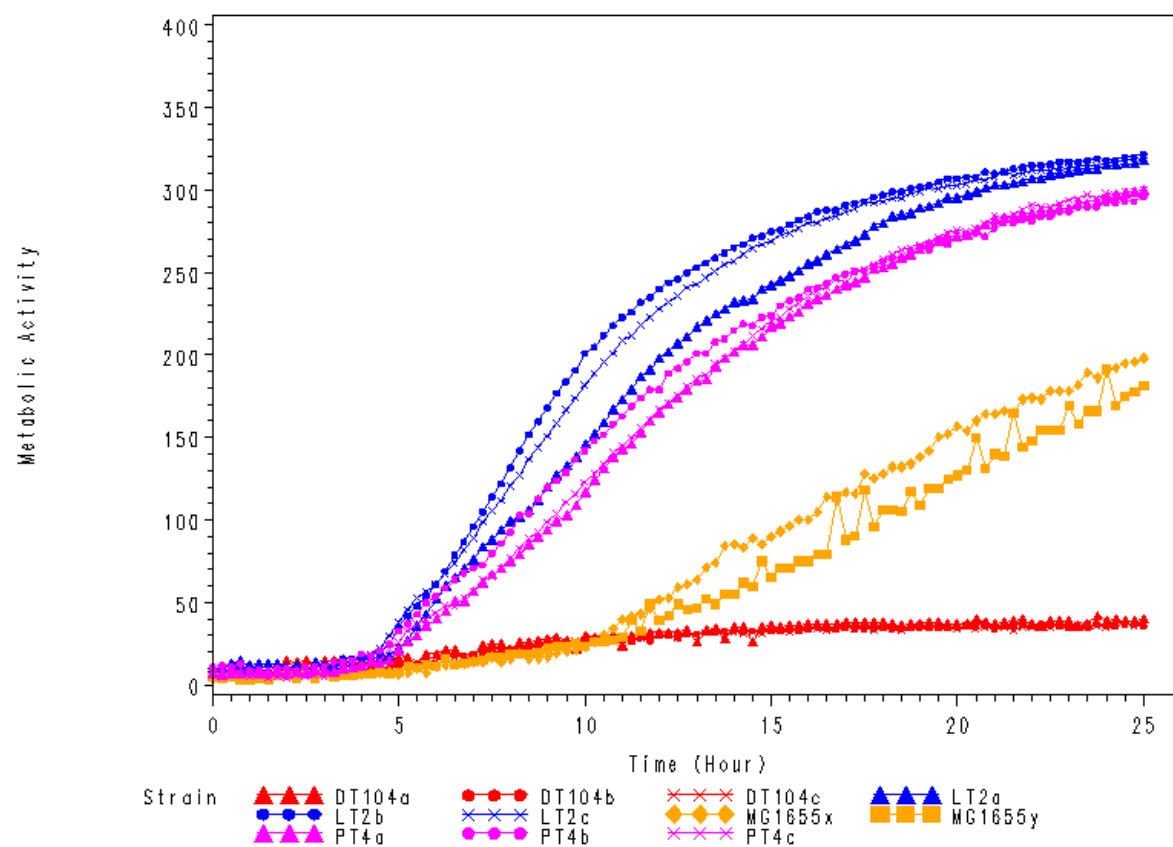

PM01, E03 (D-Glucose-1-Phosphate)

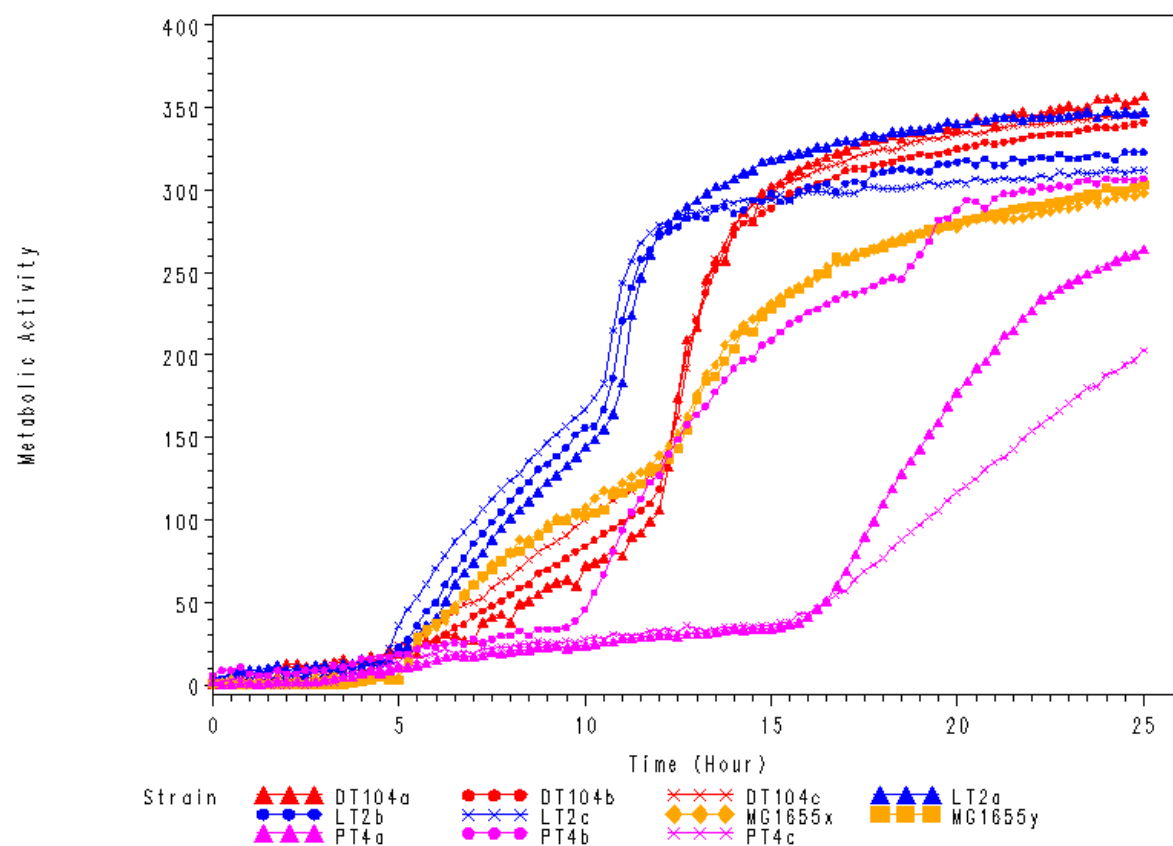

Kinetic Data of Carbon Source Utilisation

PM01, E04 (D-Fructose-6-Phosphate)

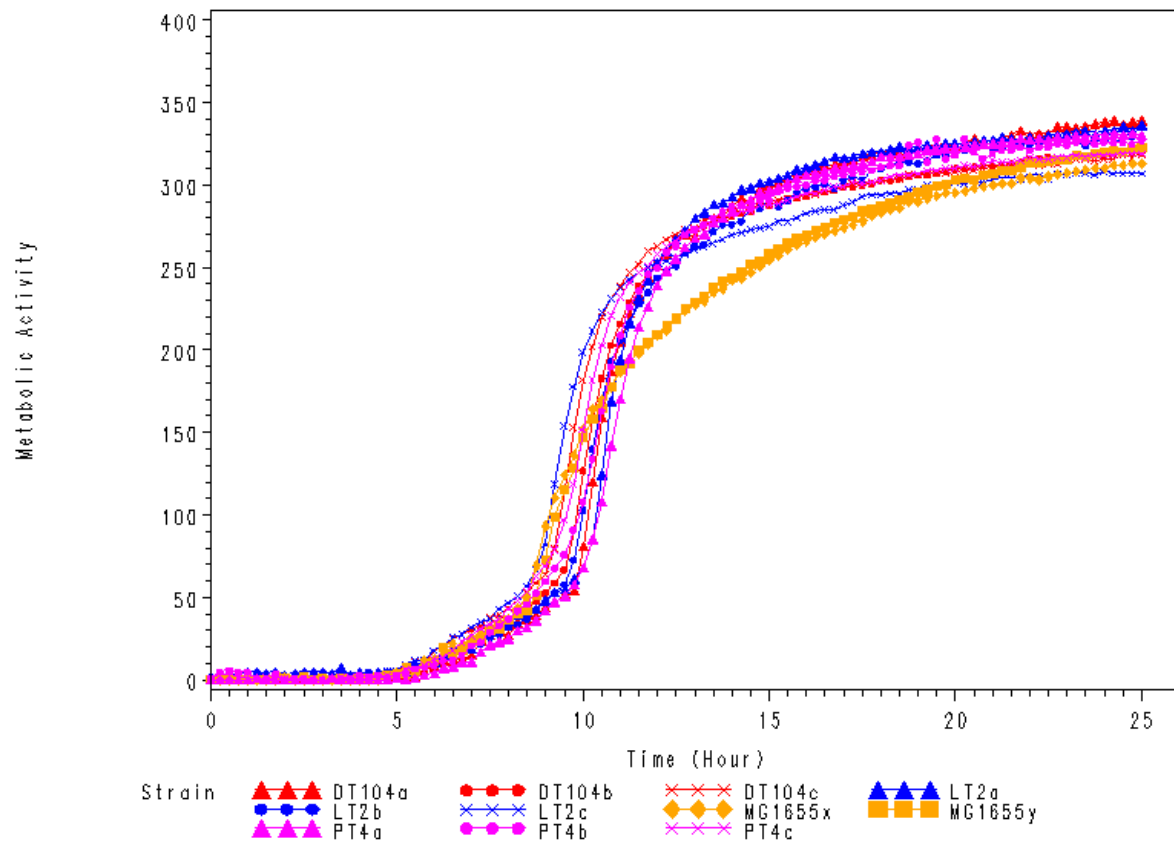

PM01, E05 (Tween 80)

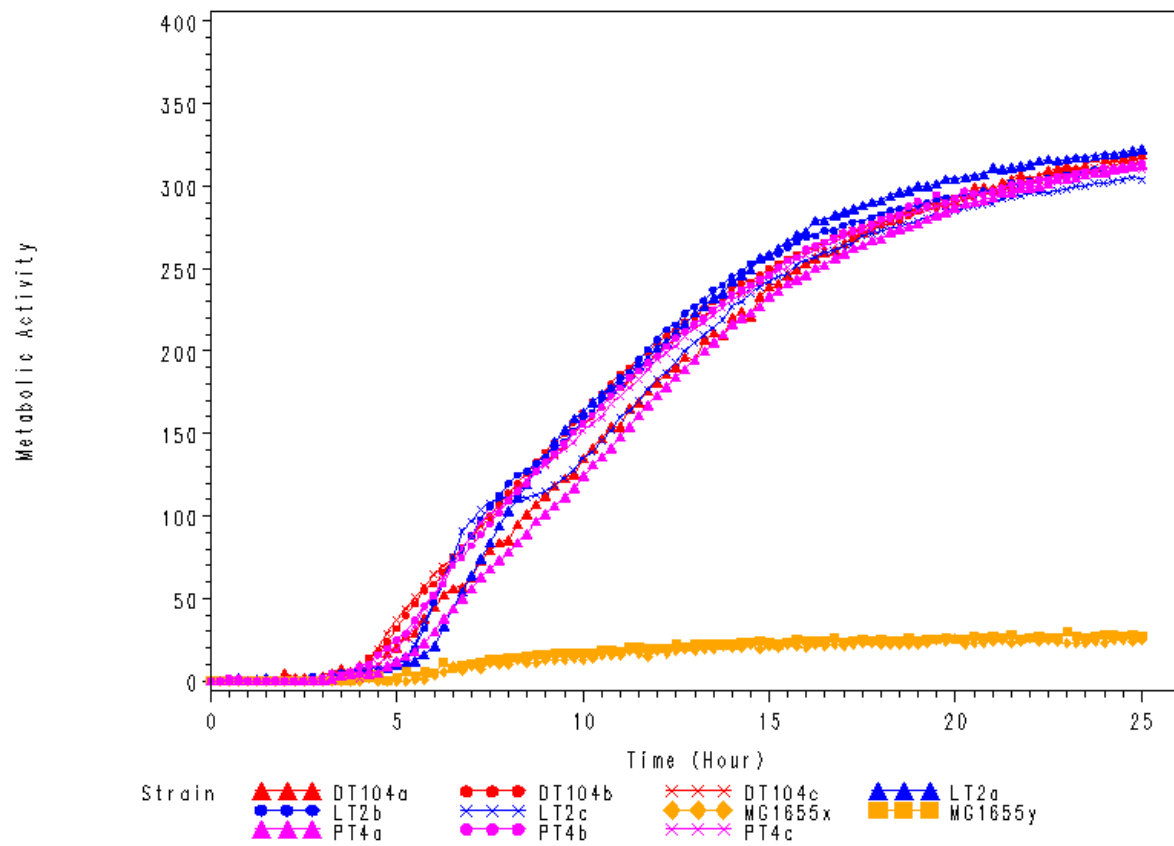

PM01, E06 (α-Hydroxy Glutaric Acid-γ-Lactone)

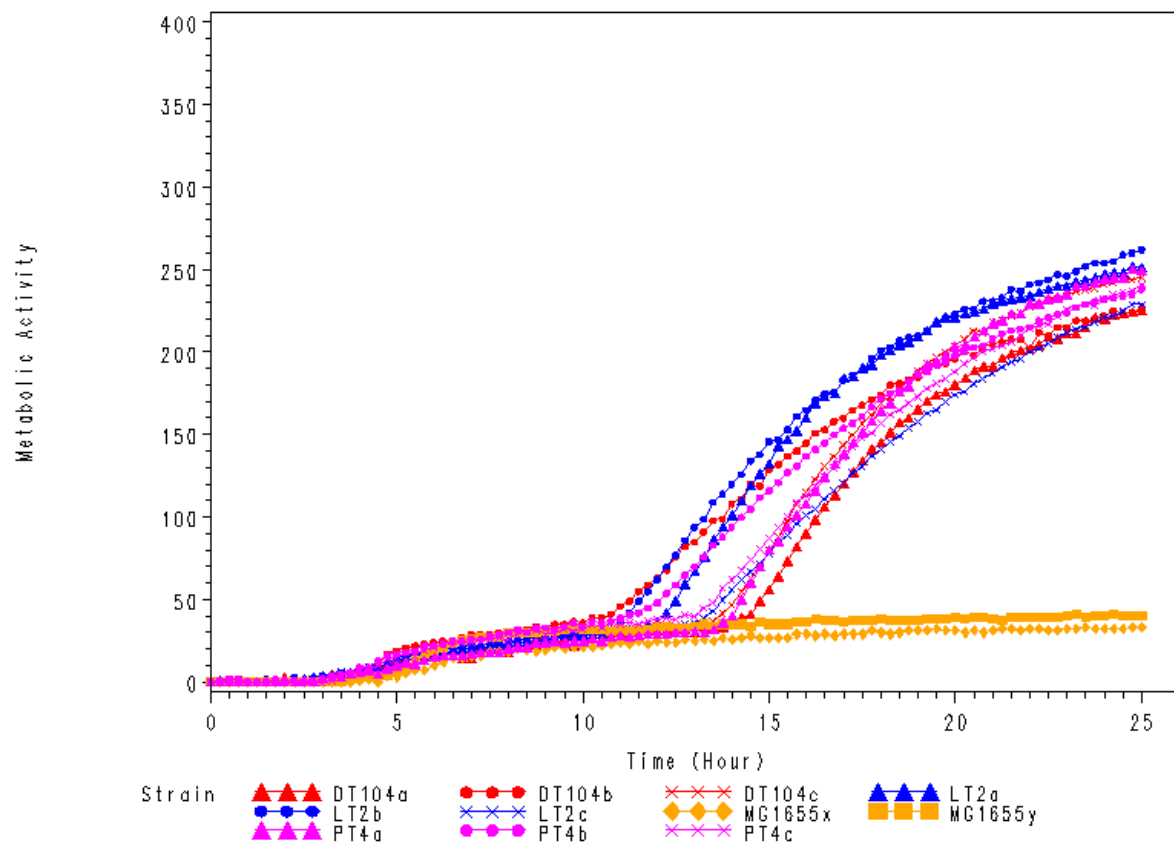

Kinetic Data of Carbon Source Utilisation

PM01, E07 (a-Hydroxy-Butyric Acid)

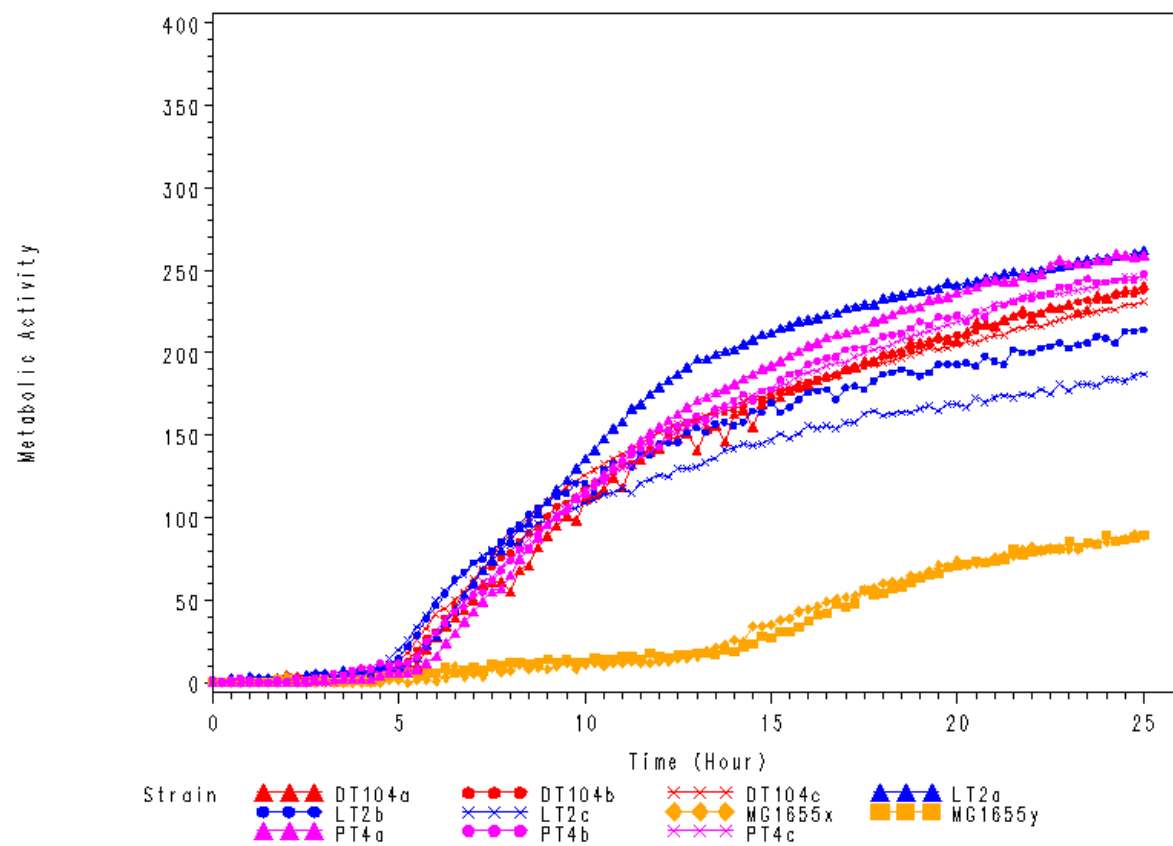

PM01, E08 (b-Methyl-D-Glucoside)

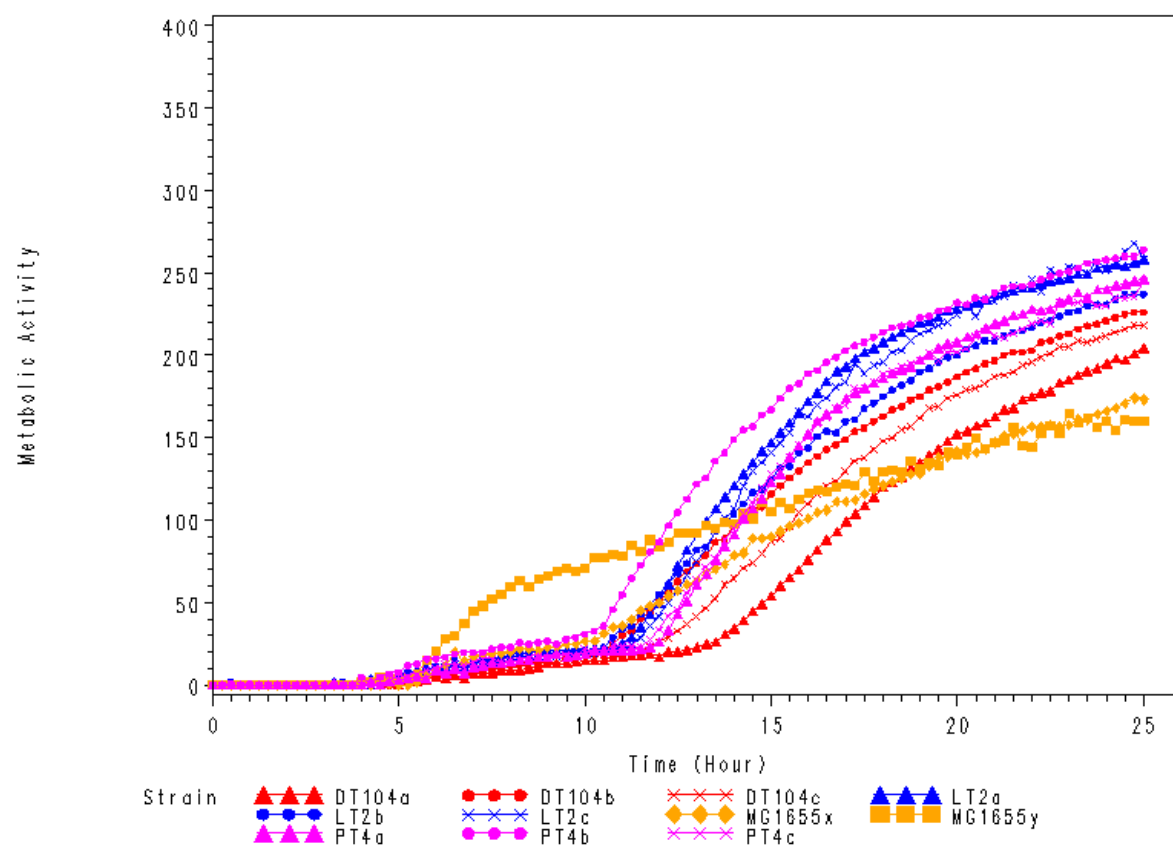

PM01, E09 (Adonitol)

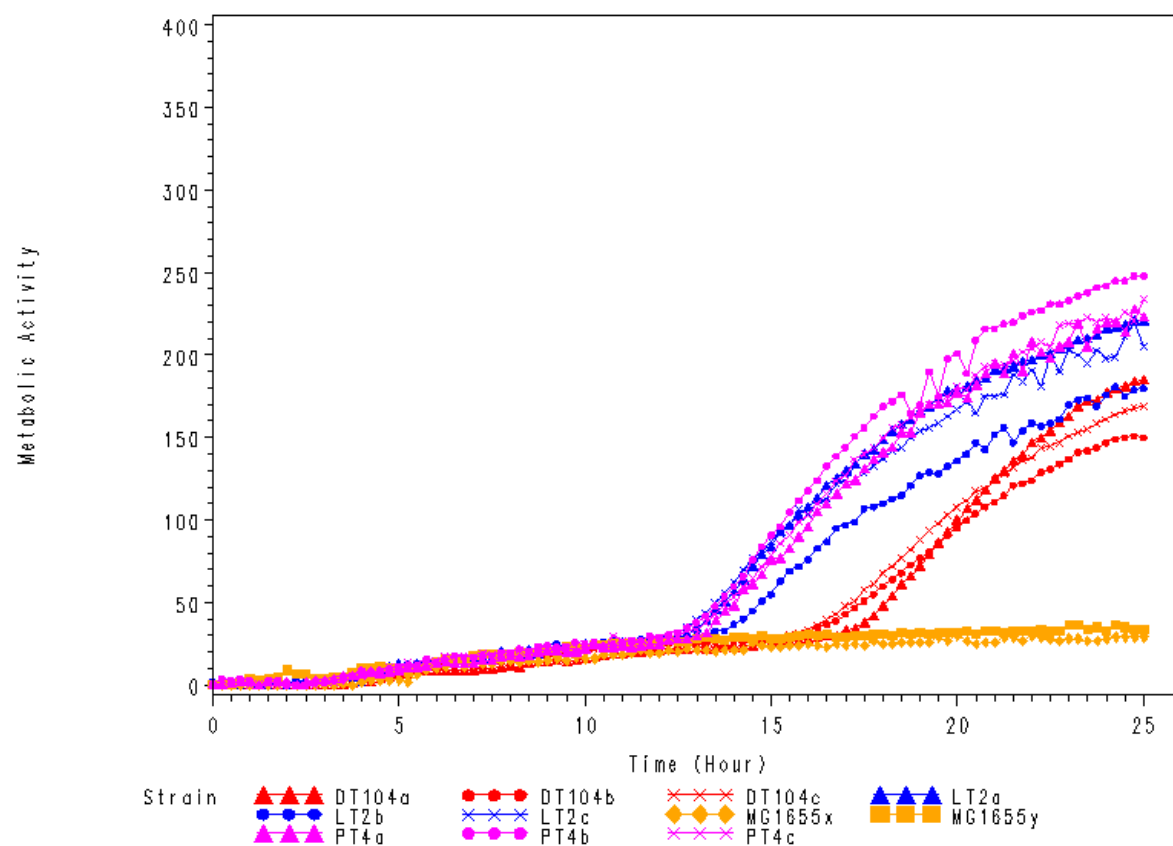

Kinetic Data of Carbon Source Utilisation

PM01, E10 (Maltotriose)

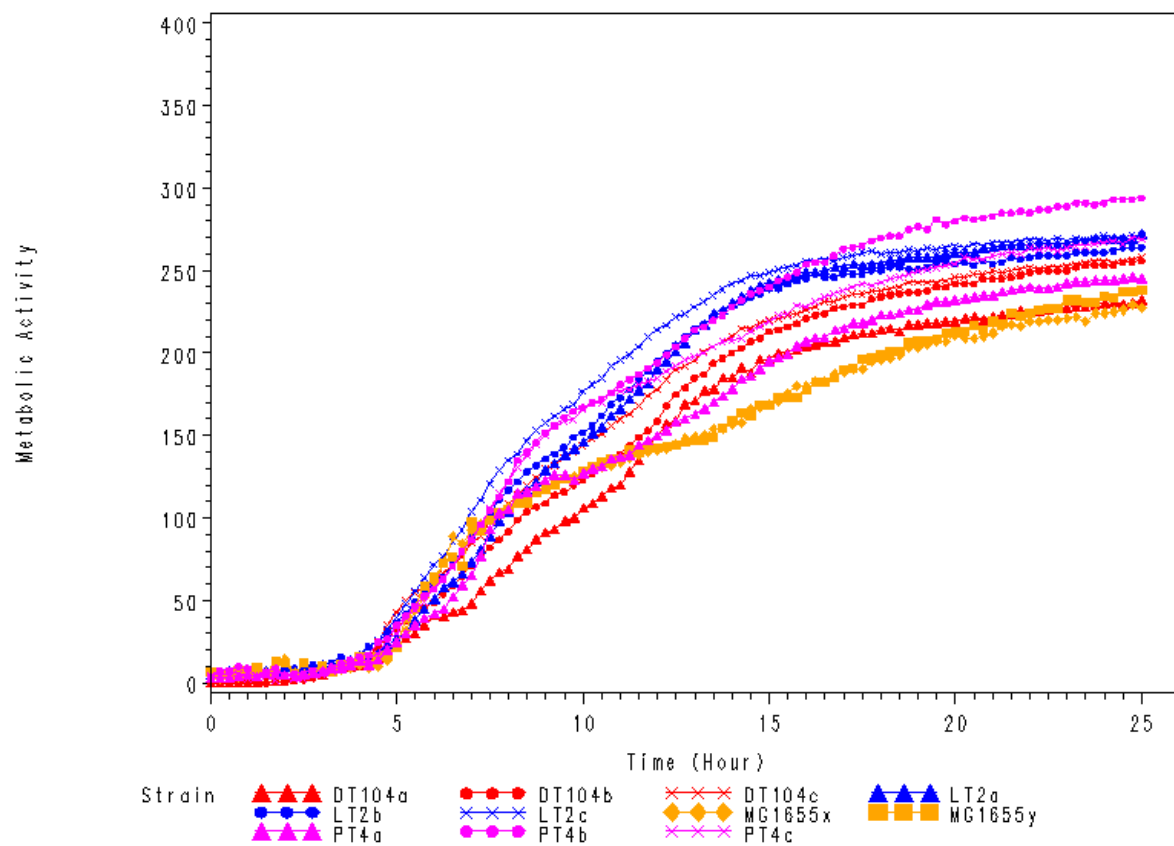

PM01, E11 (2'-Deoxy-Adenosine)

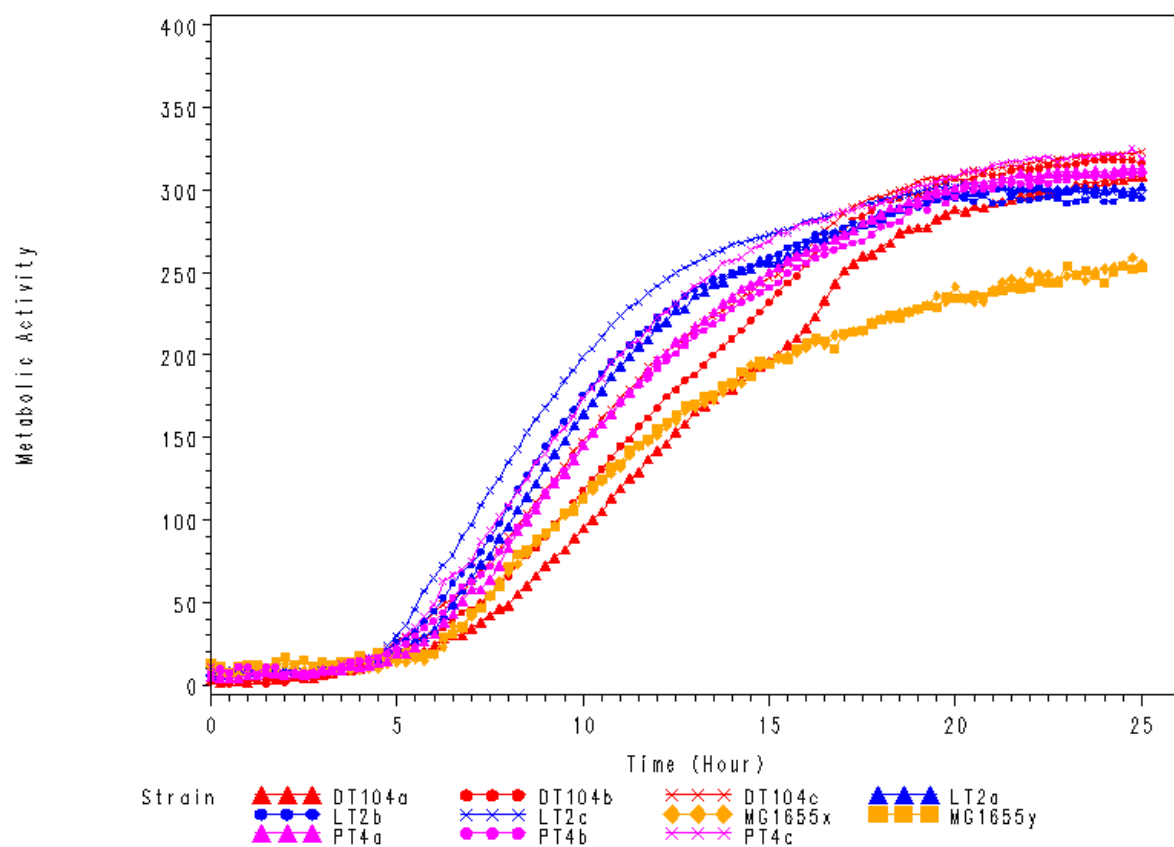

PM01, E12 (Adenosine)

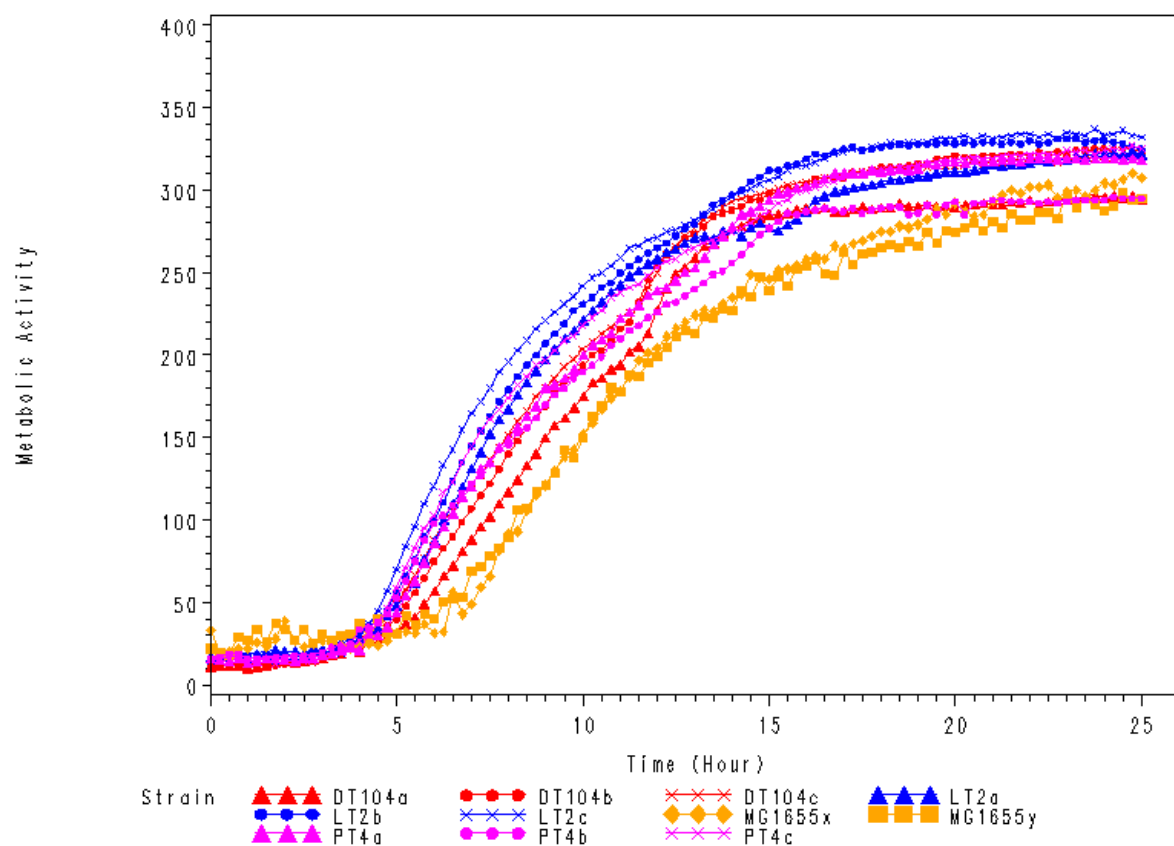

Kinetic Data of Carbon Source Utilisation

PM01, F01 (Glycyl-L-Aspartic Acid)

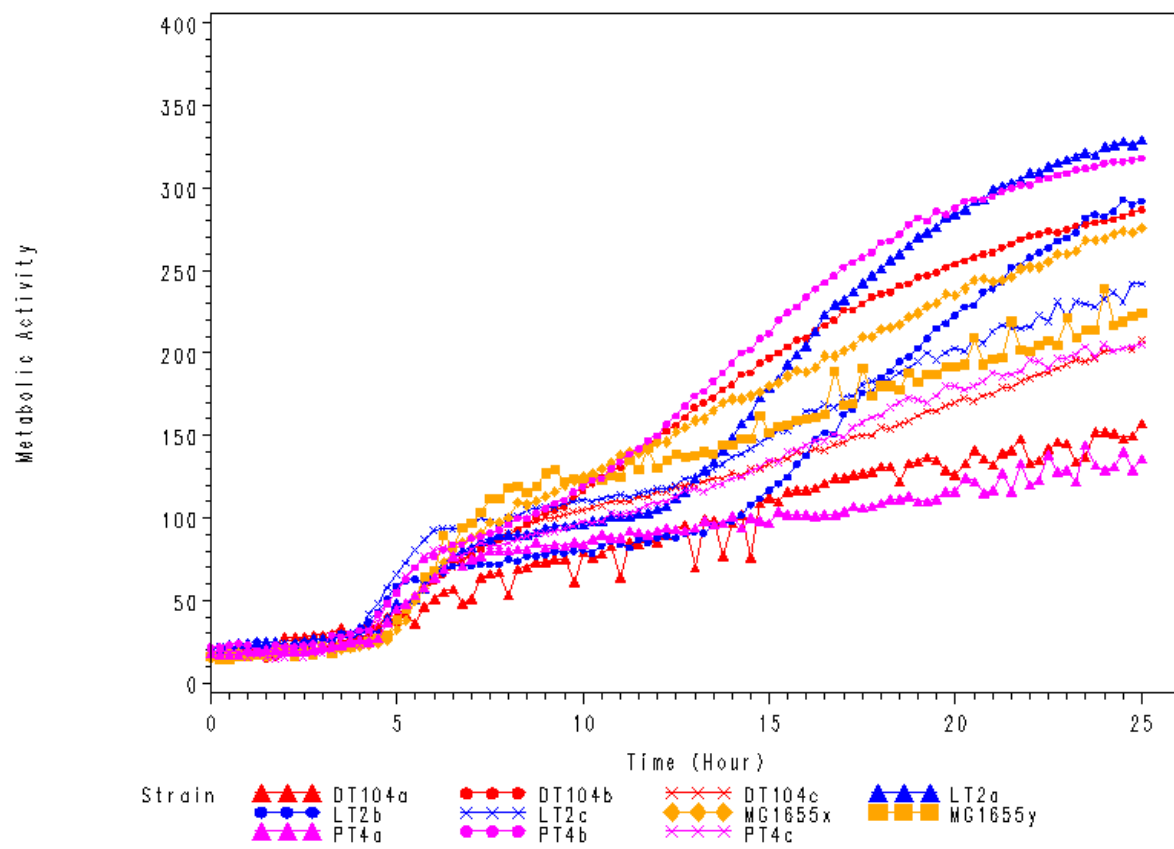

PM01, F02 (Citric Acid)

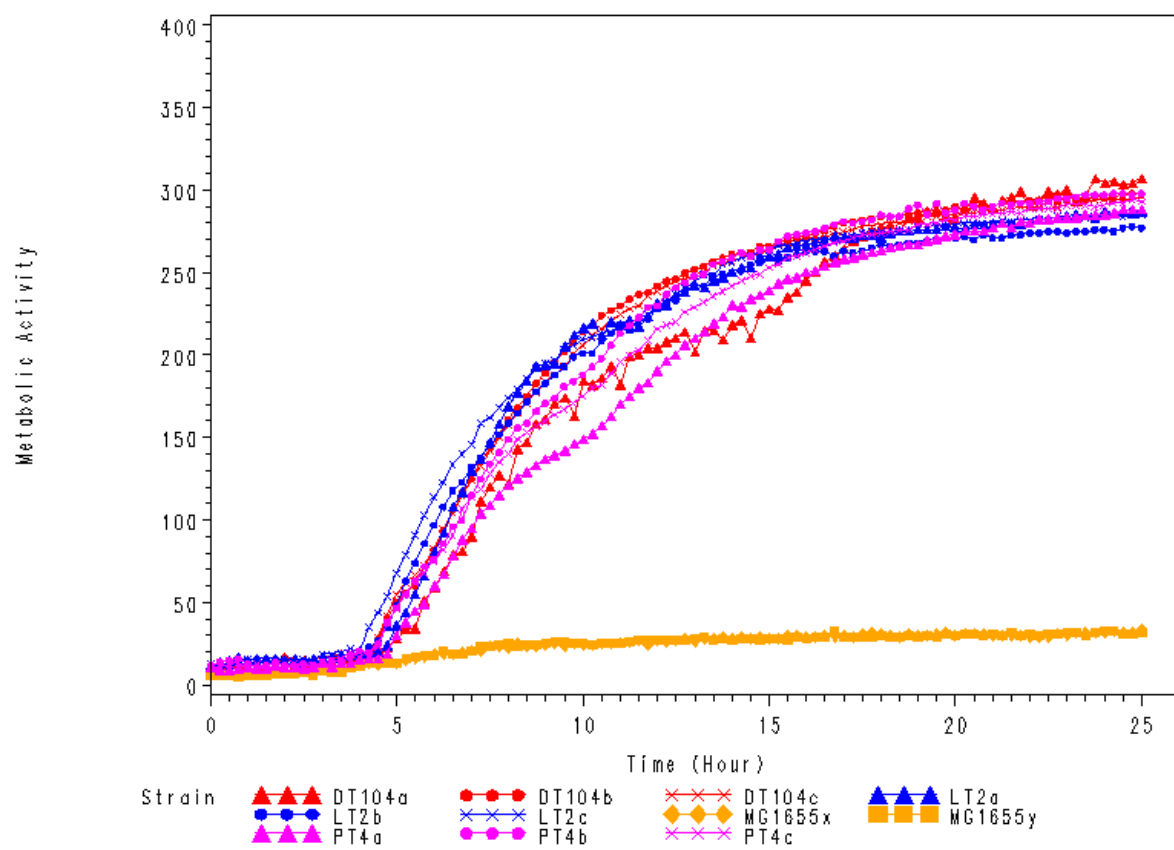

PM01, F03 (m-Inositol)

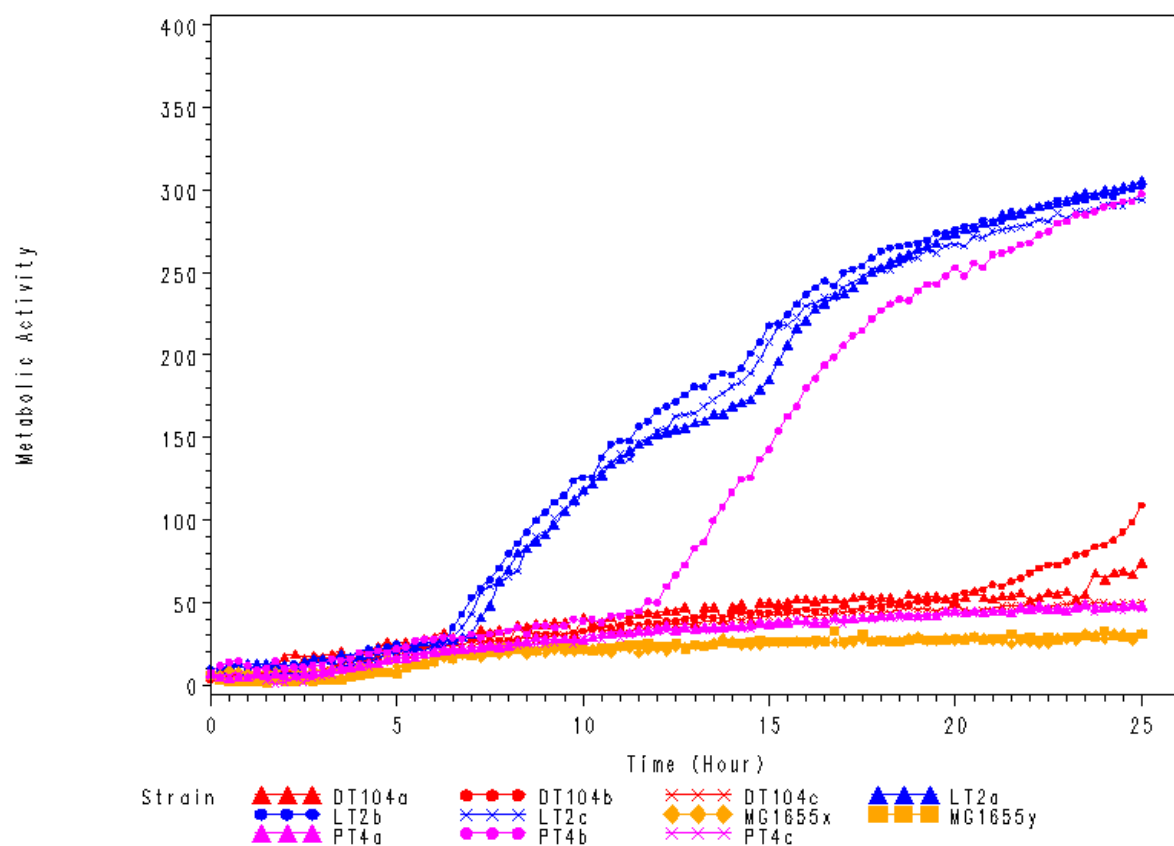

Kinetic Data of Carbon Source Utilisation

PM01, F04 (D-Threonine)

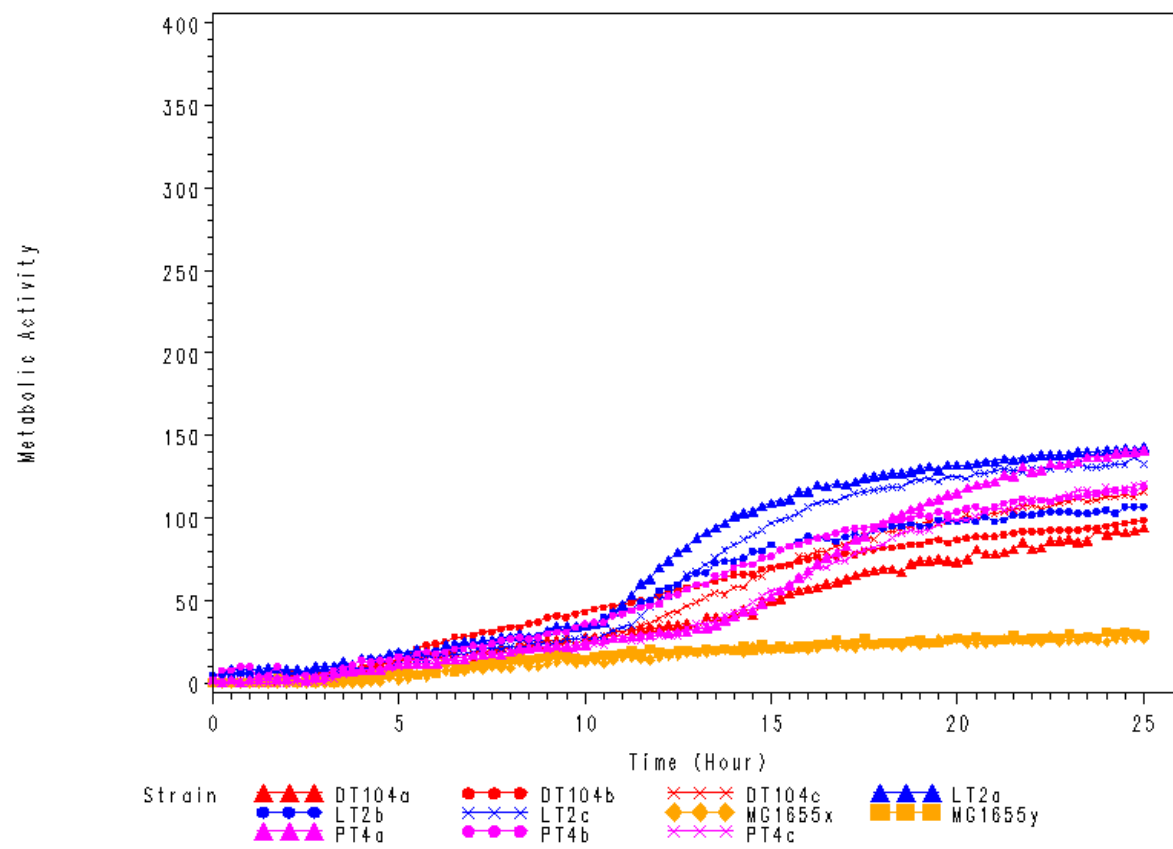

PM01, F05 (Fumaric Acid)

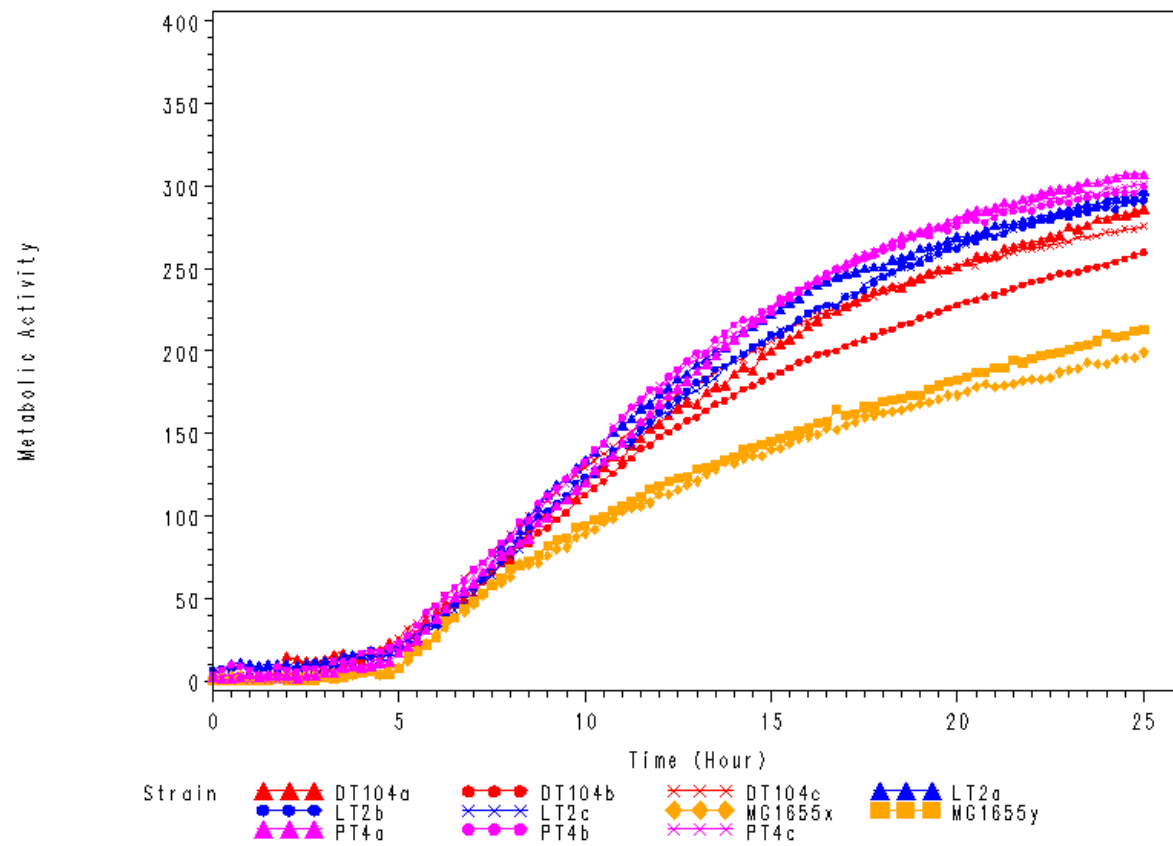

PM01, F06 (Bromo-Succinic Acid)

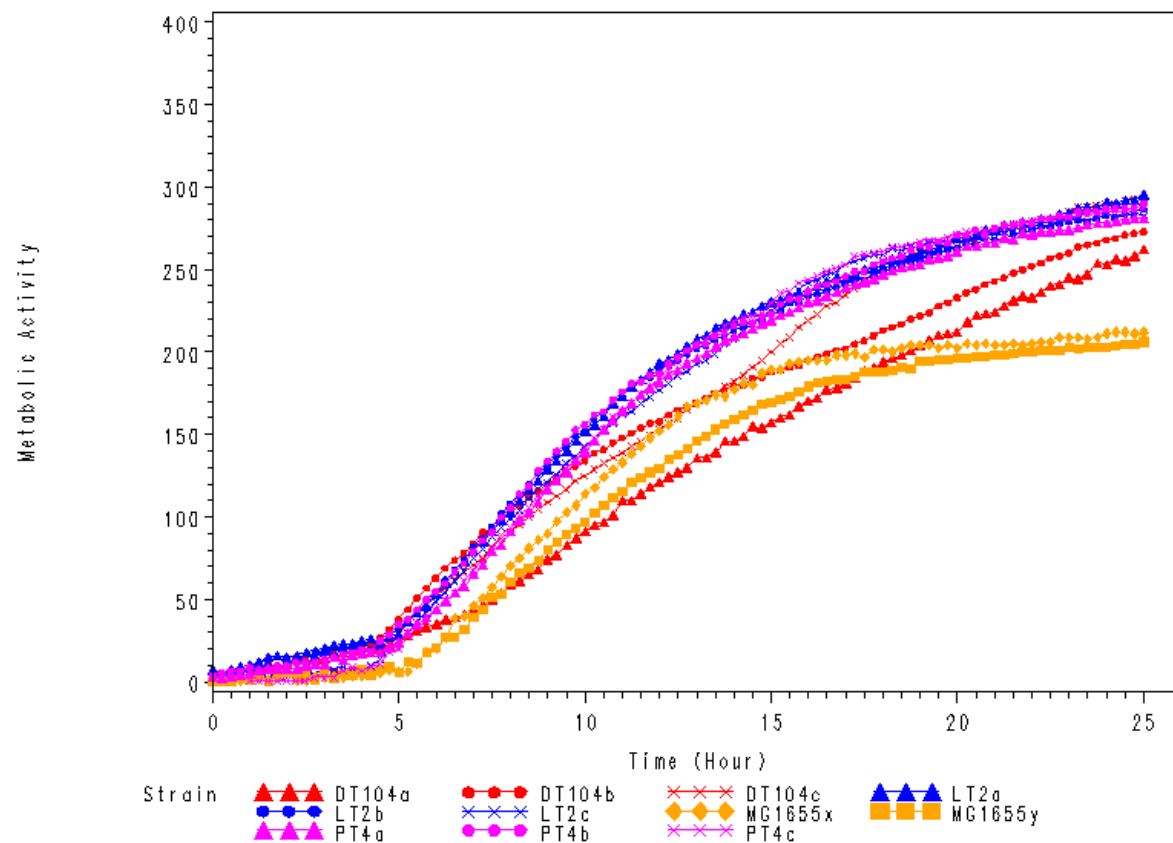

Kinetic Data of Carbon Source Utilisation

PM01, F07 (Propionic Acid)

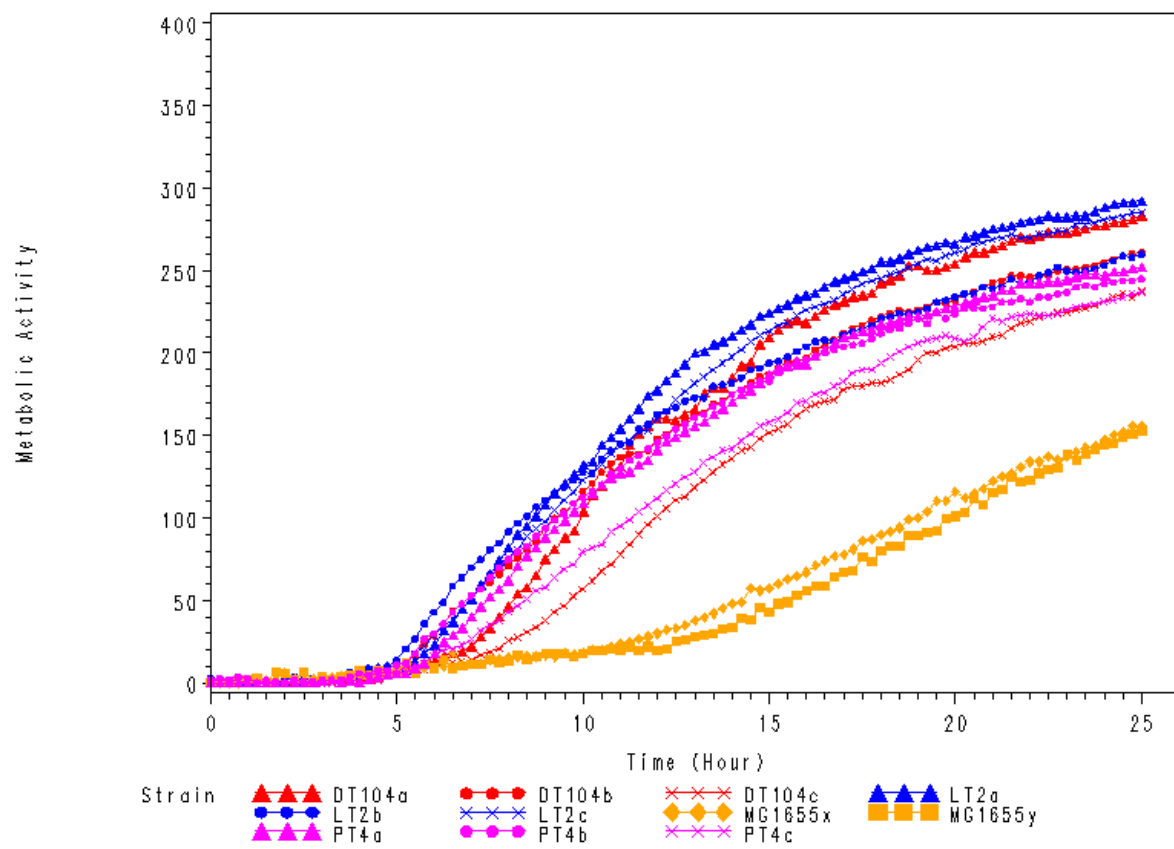

PM01, F08 (Mucic Acid)

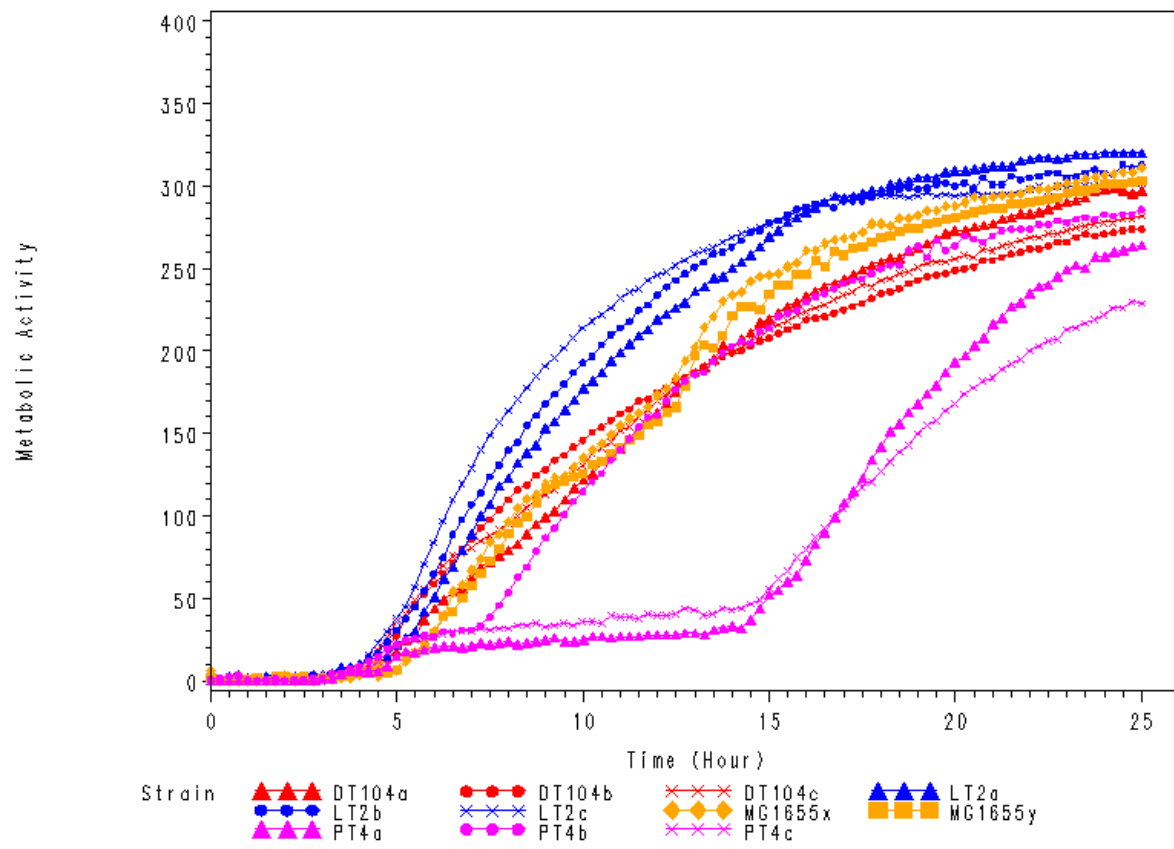

PM01, F09 (Glycolic Acid)

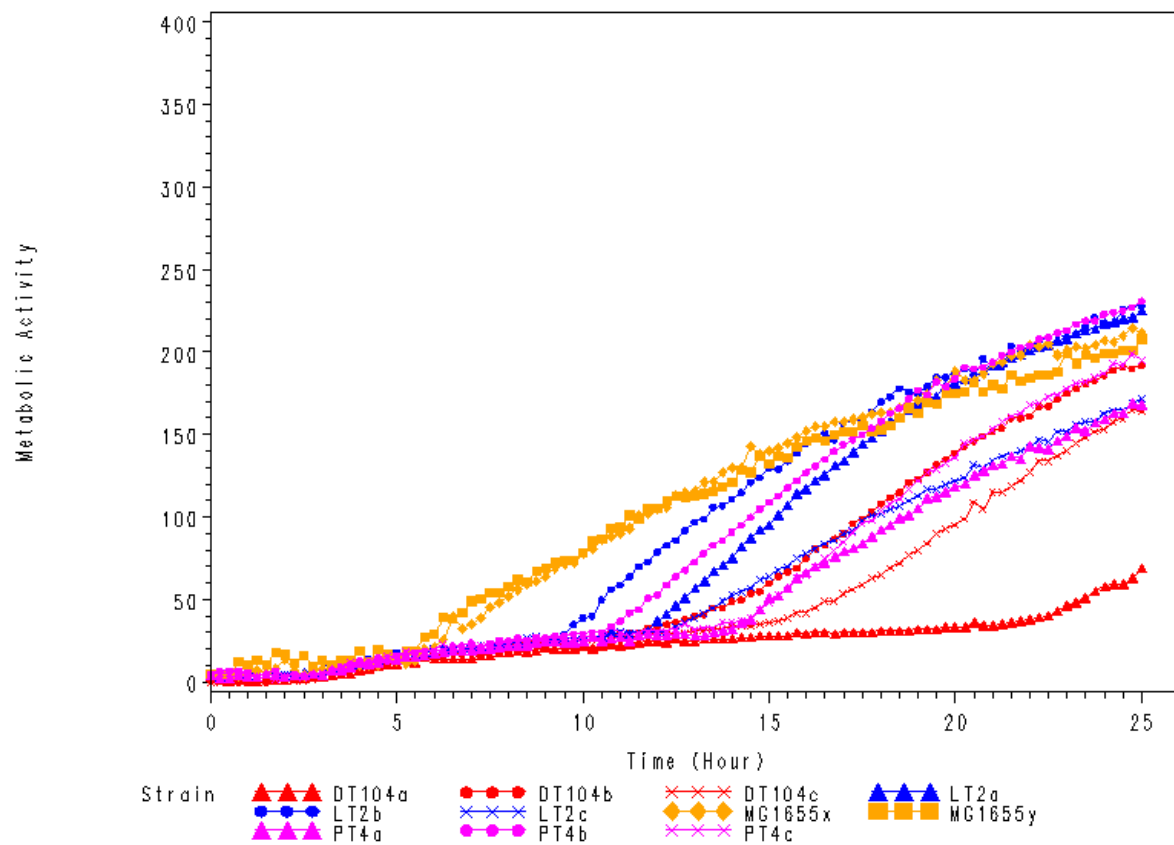

Kinetic Data of Carbon Source Utilisation

PM01, F10 (Glyoxylic Acid)

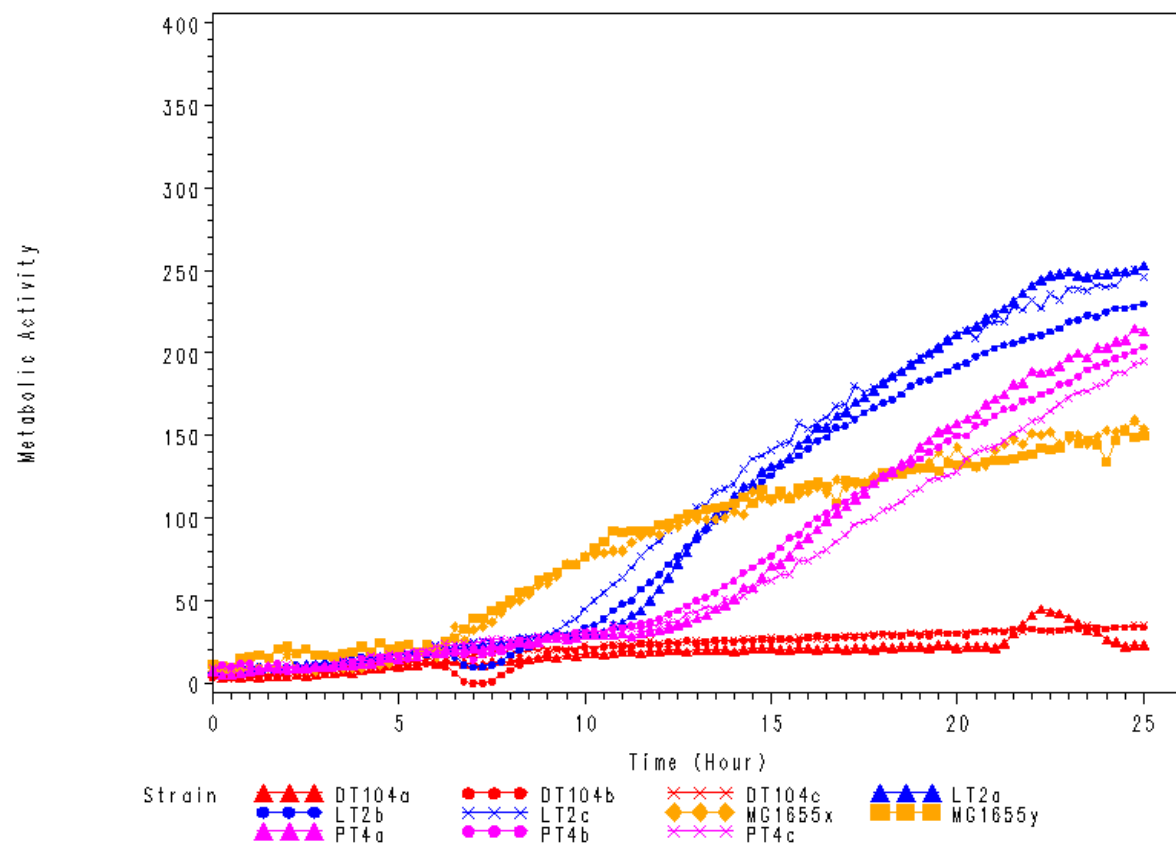

PM01, F11 (D-Cellobiose)

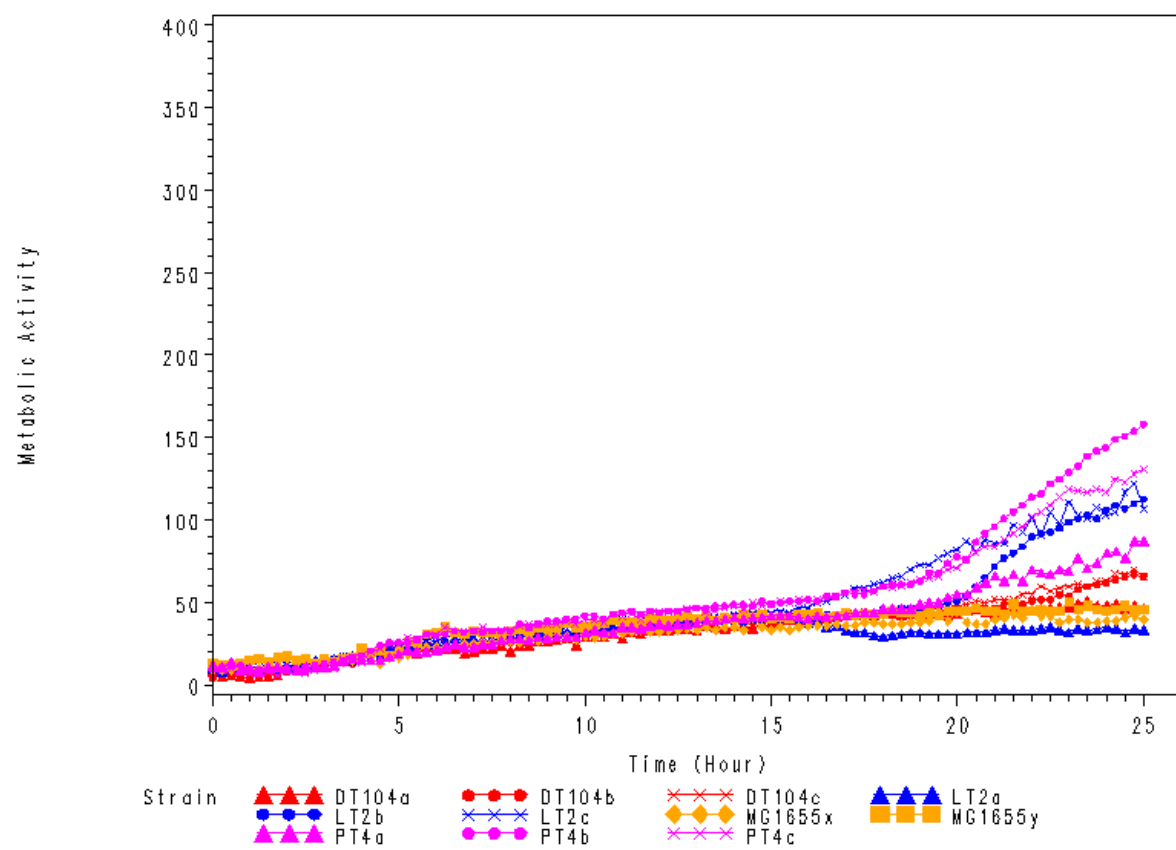

PM01, F12 (Inosine)

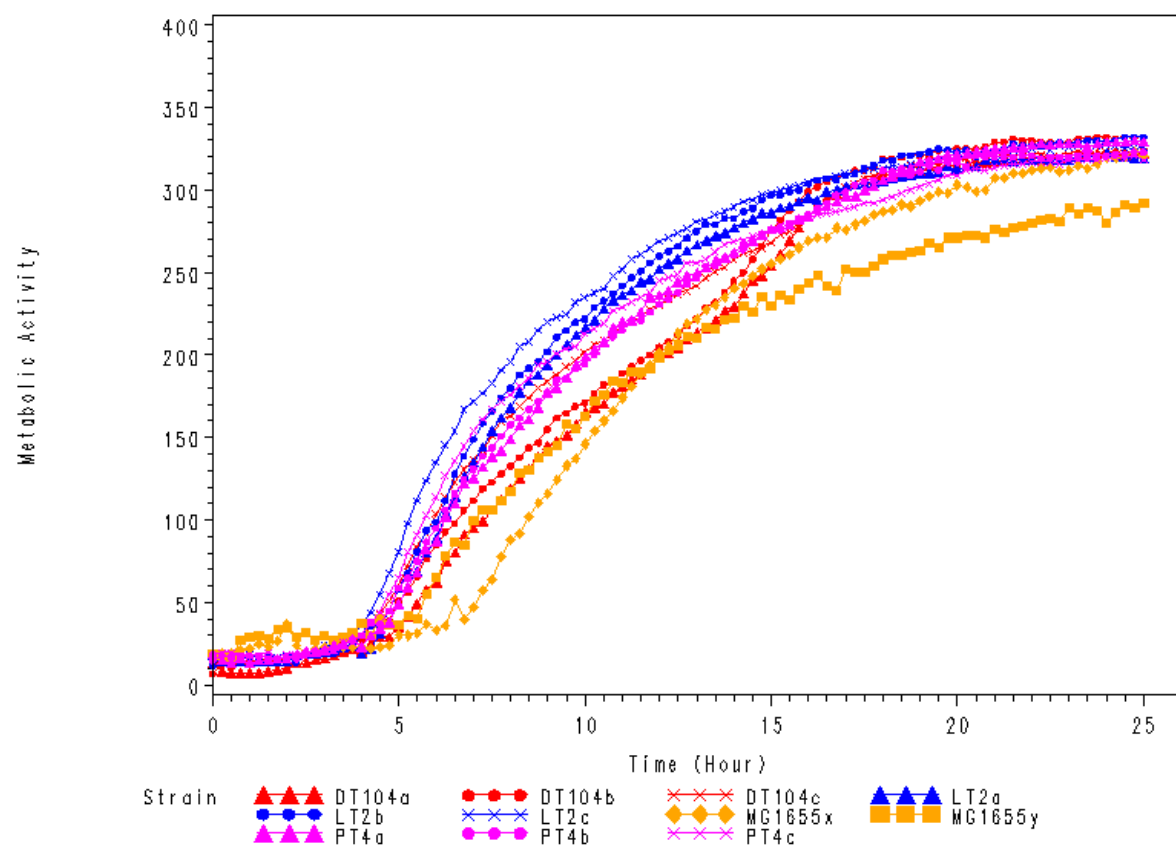



Kinetic Data of Carbon Source Utilisation

PM01, G01 (Glycyl-L-Glutamic Acid)

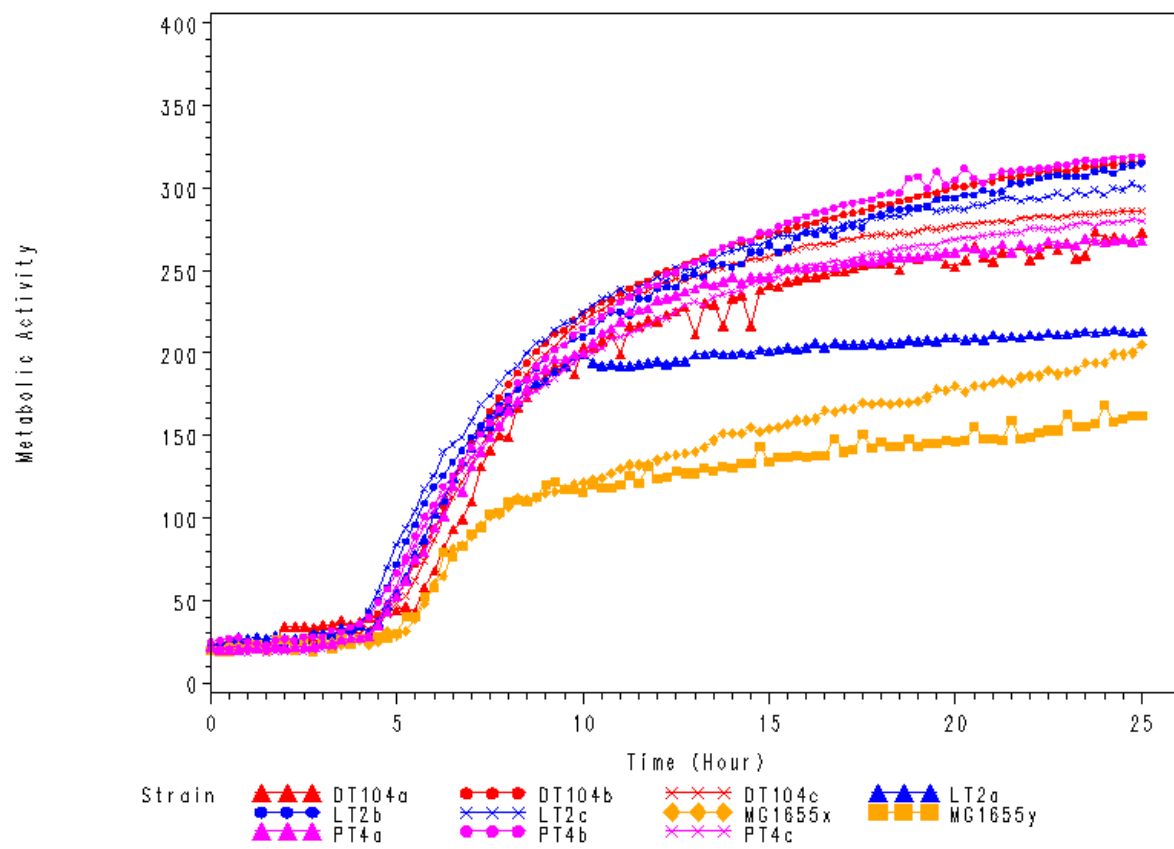

PM01, G02 (Tricarballic Acid)

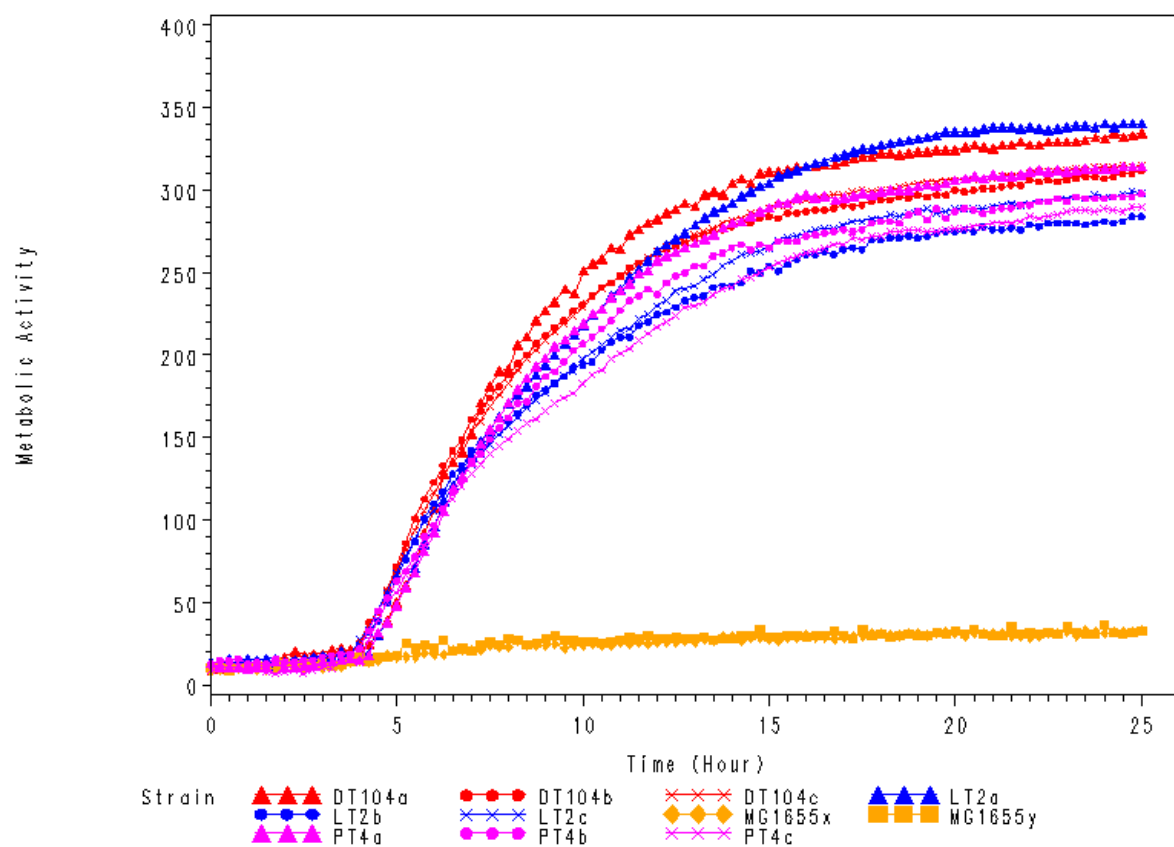

PM01, G03 (L-Serine)

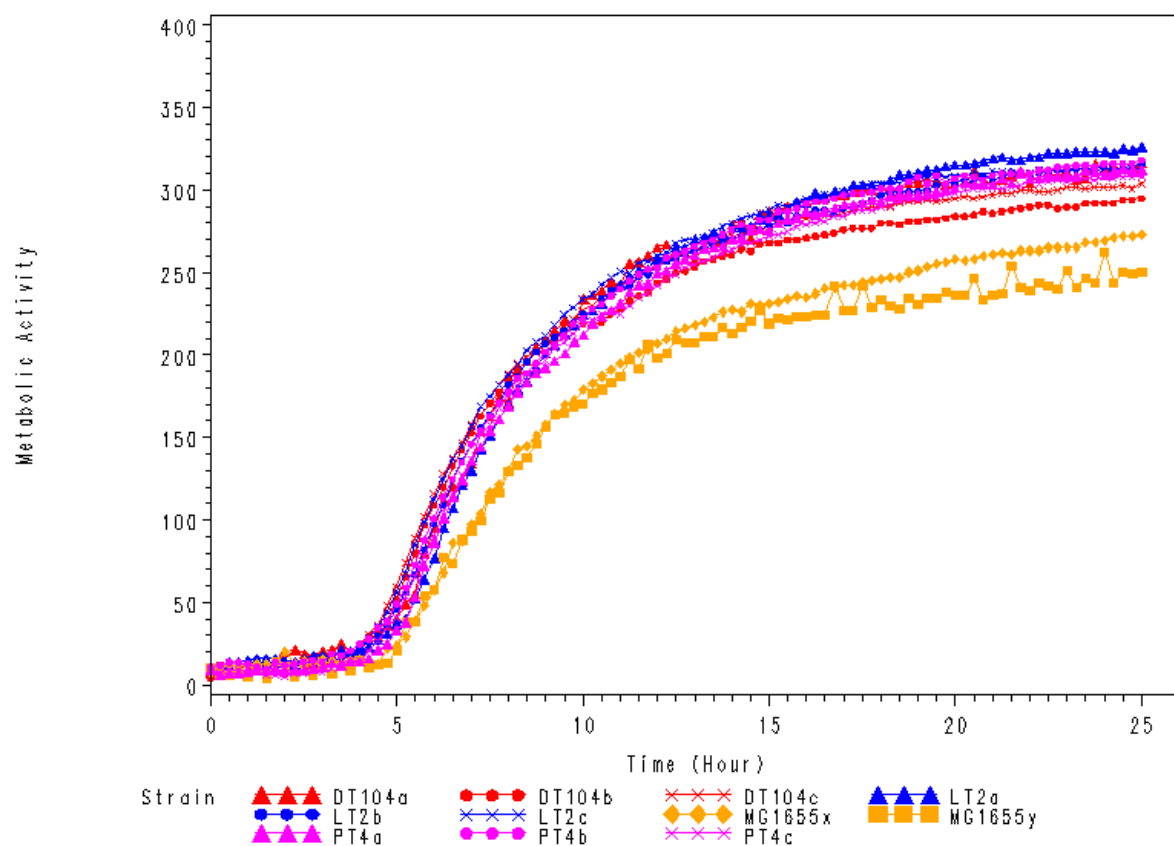

Kinetic Data of Carbon Source Utilisation

PM01, G04 (L-Threonine)

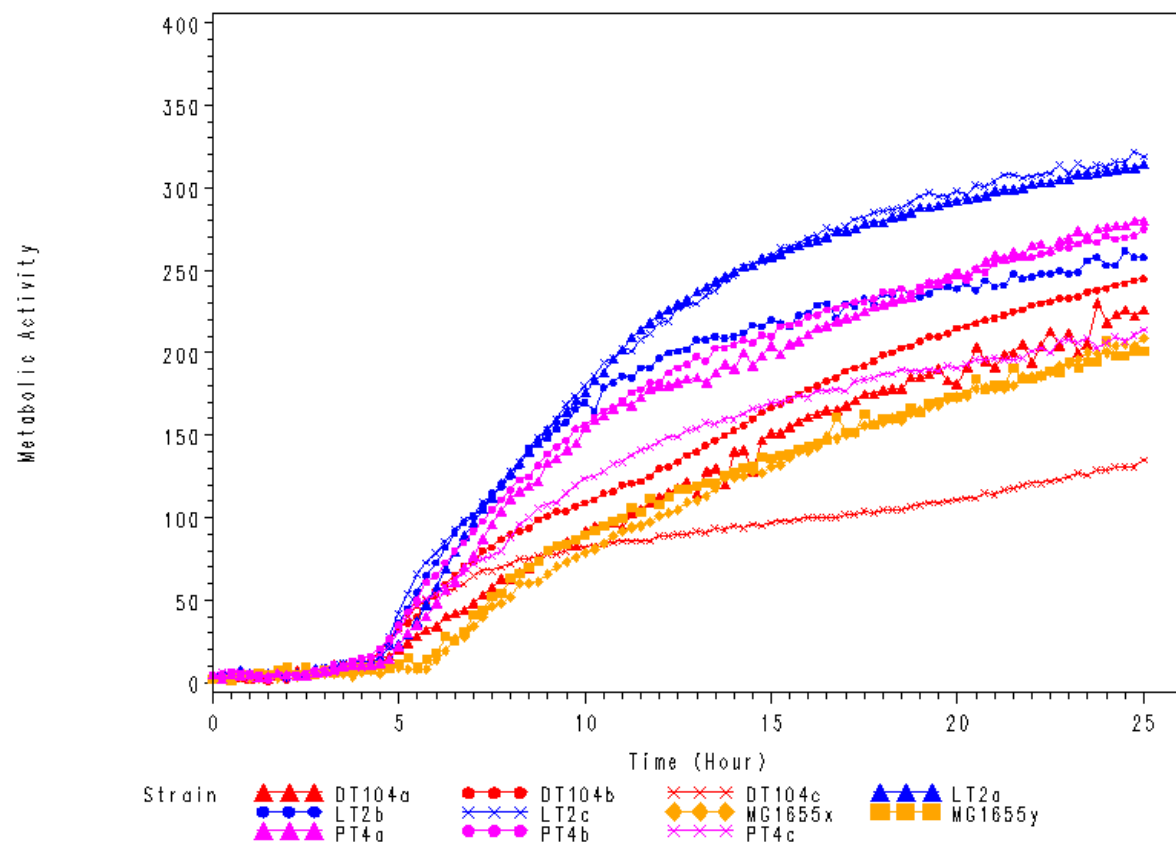

PM01, G05 (L-Alanine)

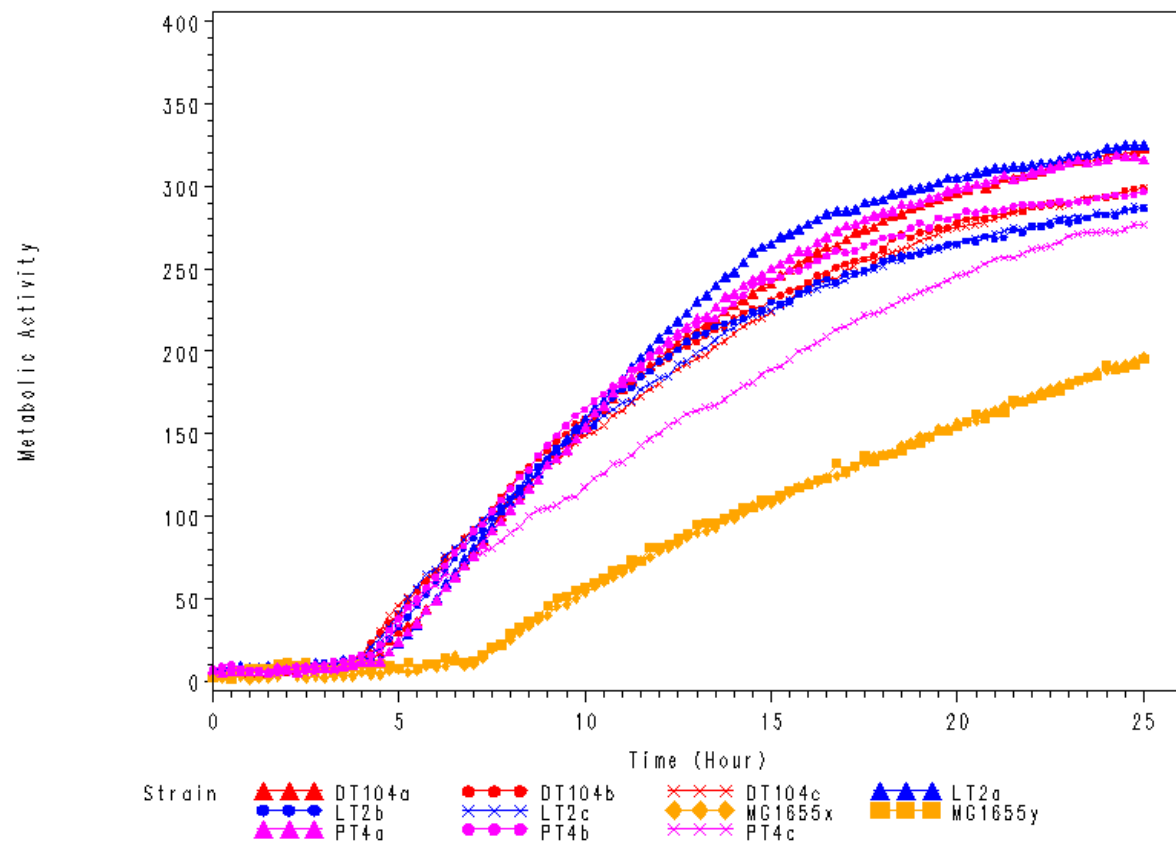

PM01, G06 (L-Alanyl-Glycine)

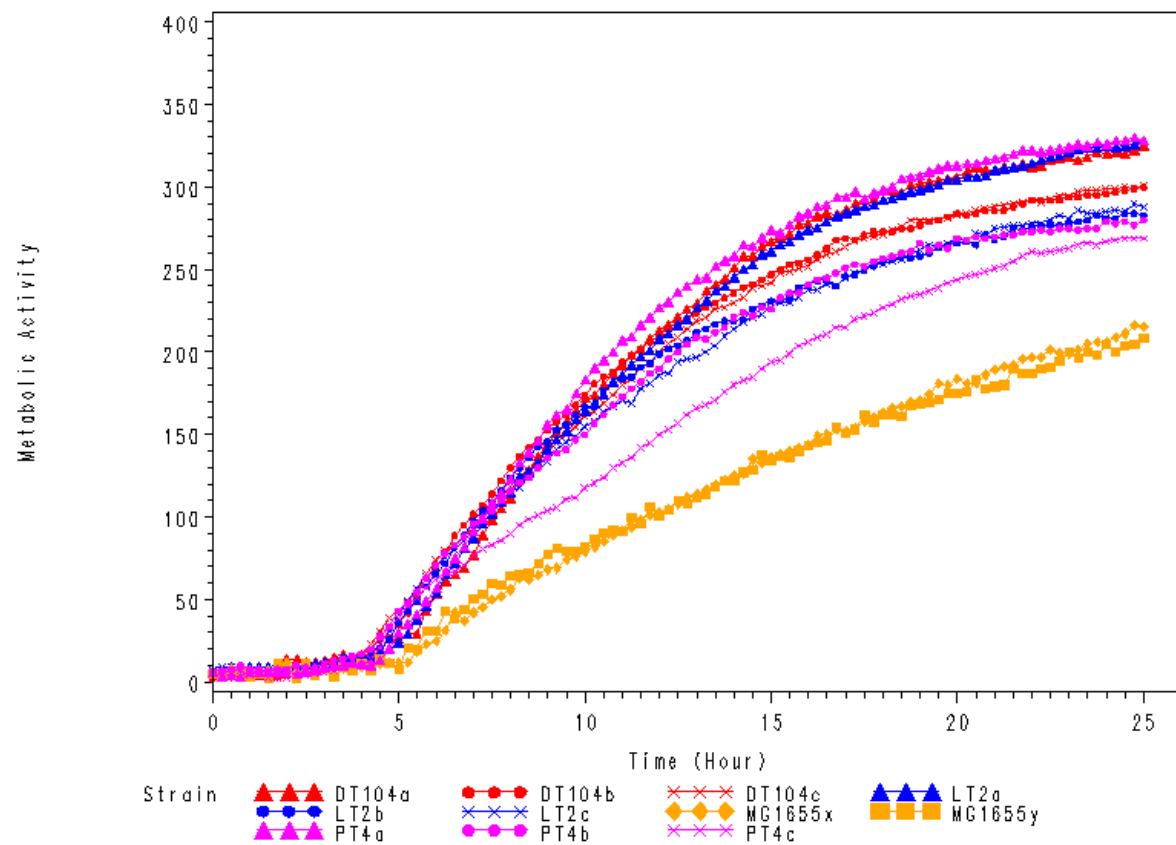

Kinetic Data of Carbon Source Utilisation

PM01, G07 (Acetoacetic Acid)

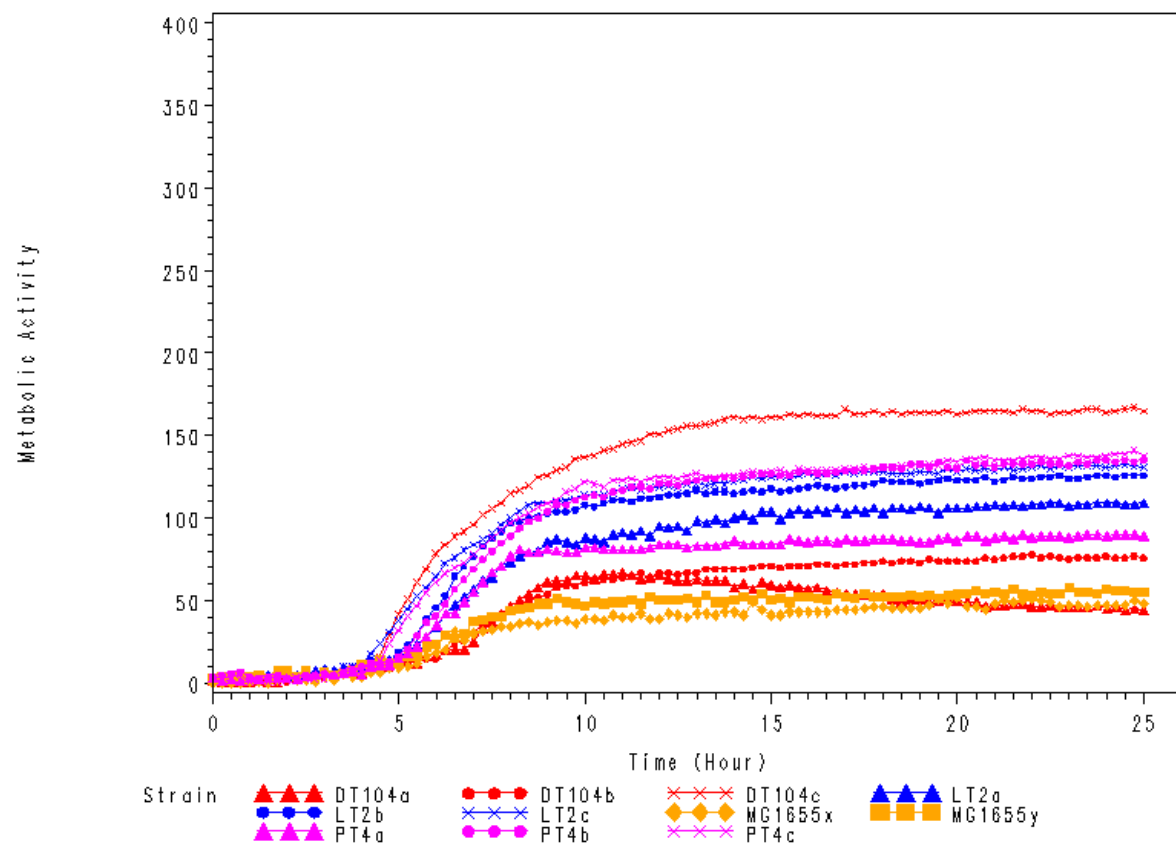

PM01, G08 (N-Acetyl-b-D-Mannosamine)

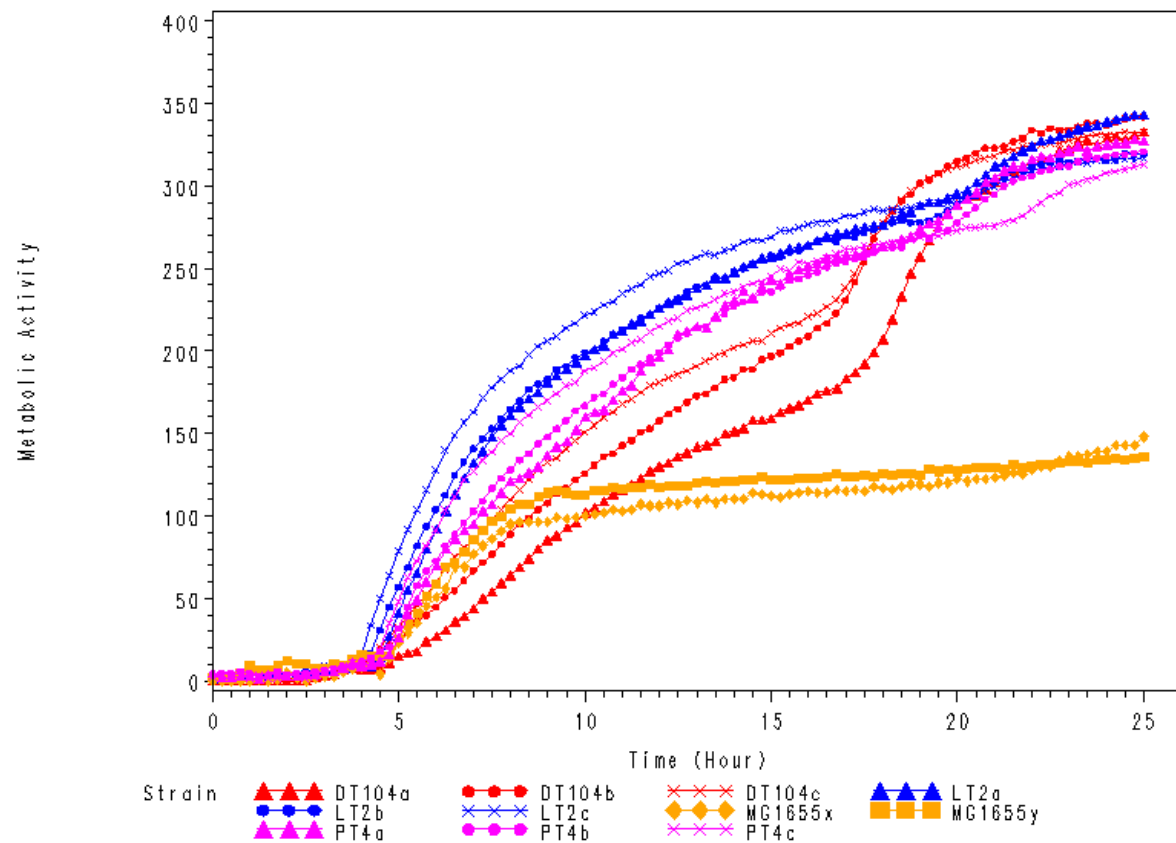

PM01, G09 (Mono Methyl Succinate)

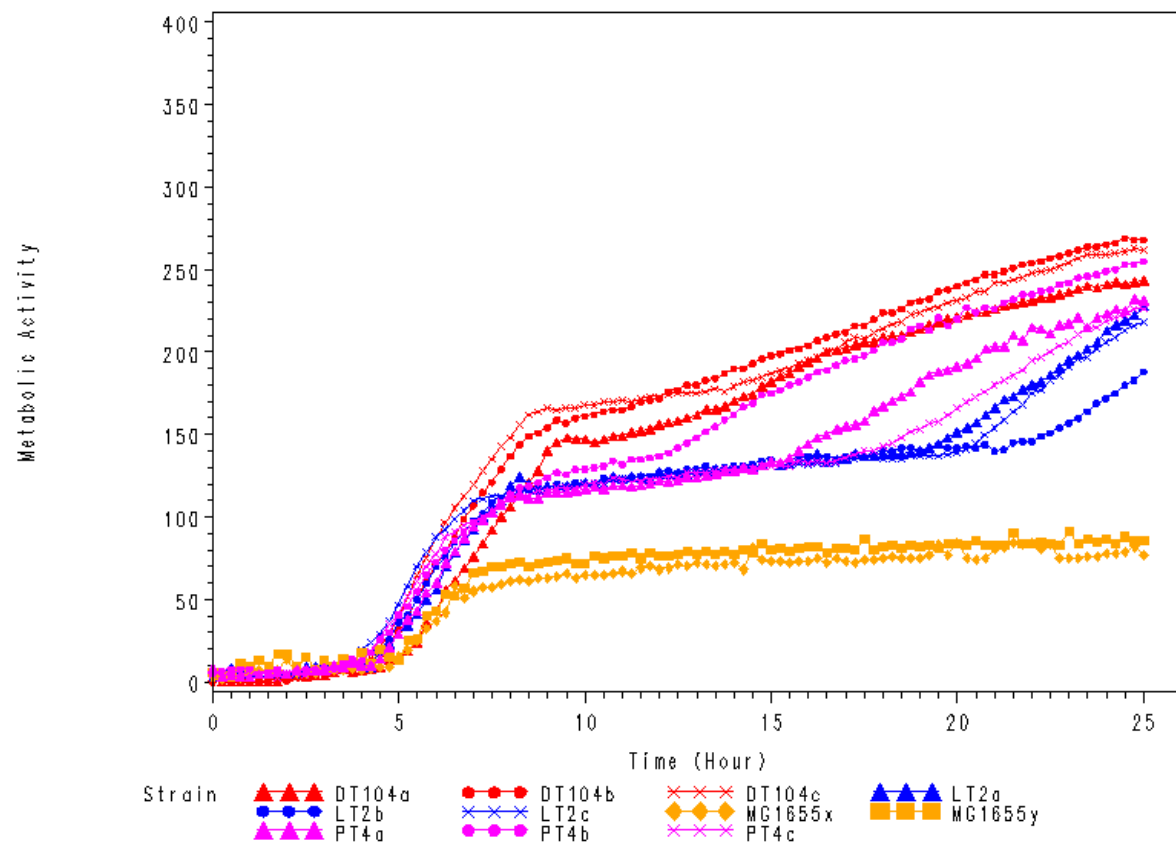

Kinetic Data of Carbon Source Utilisation

PM01, G10 (Methyl Pyruvate)

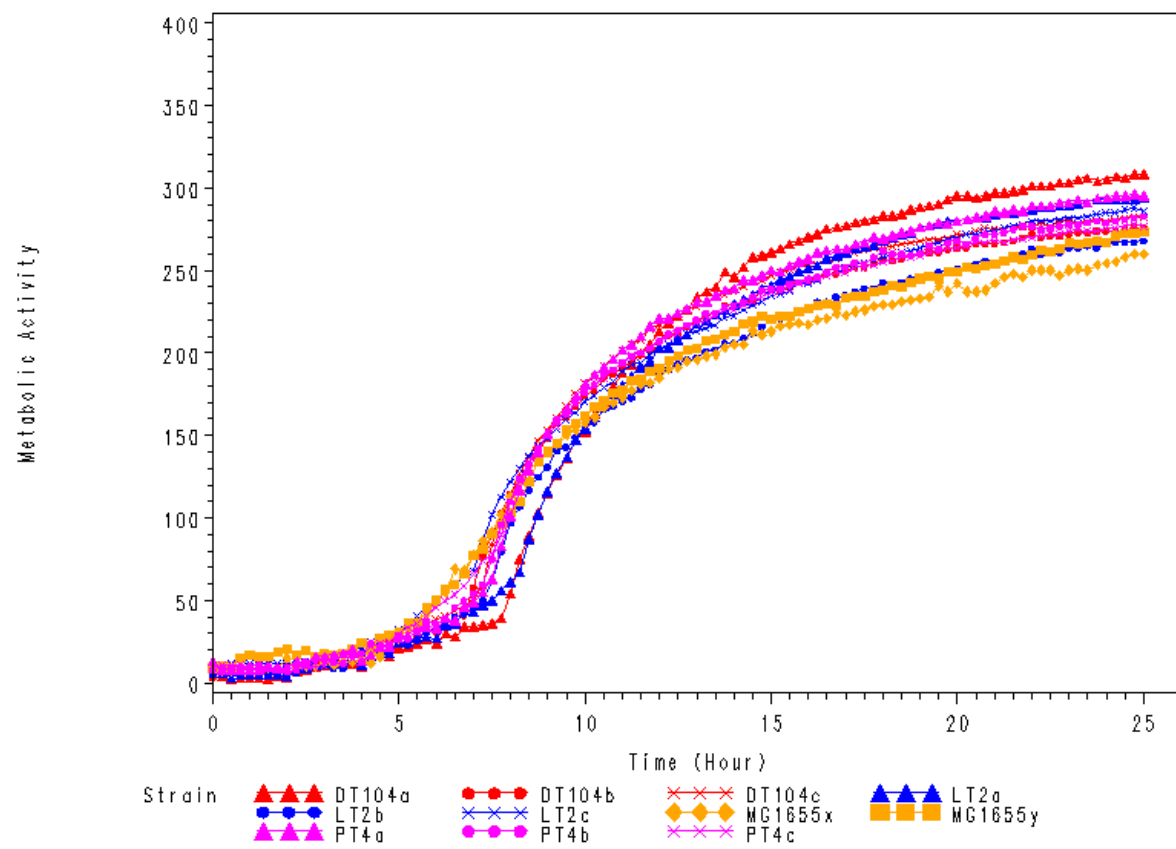

PM01, G11 (D-Malic Acid)

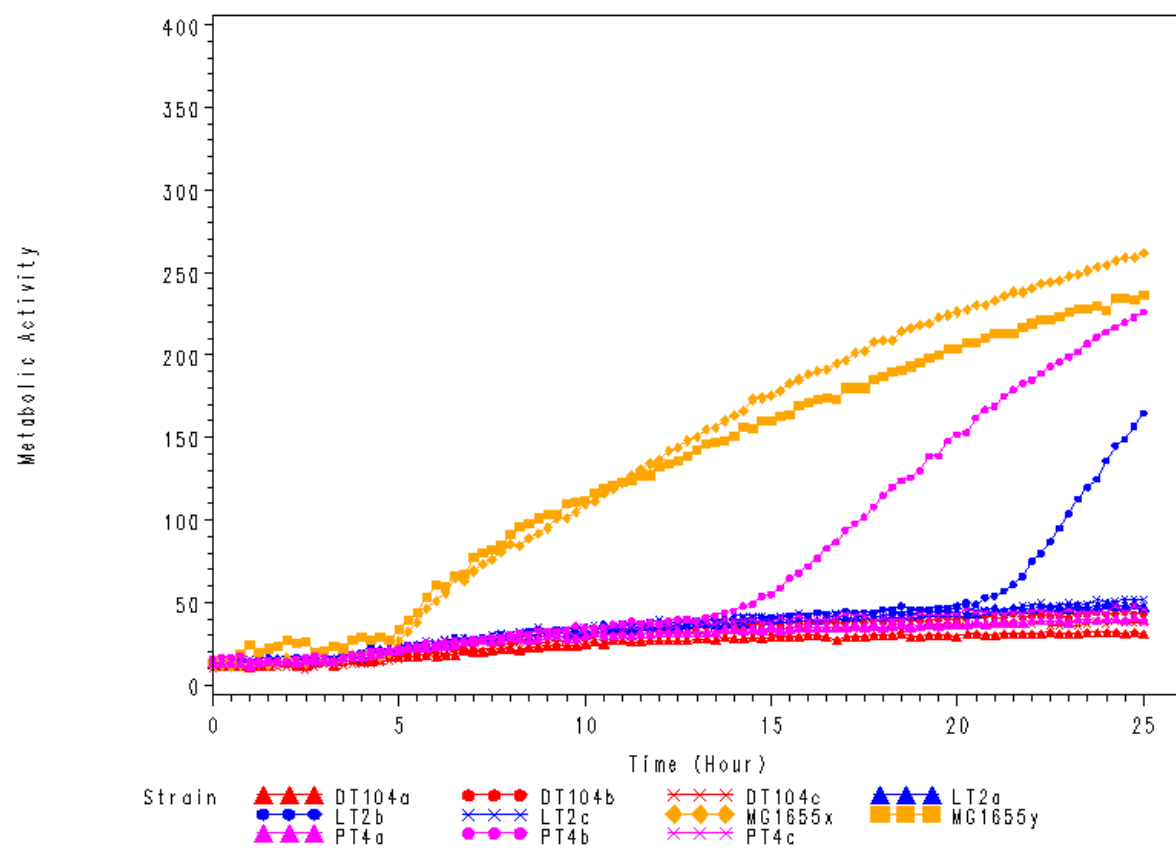

PM01, G12 (L-Malic Acid)

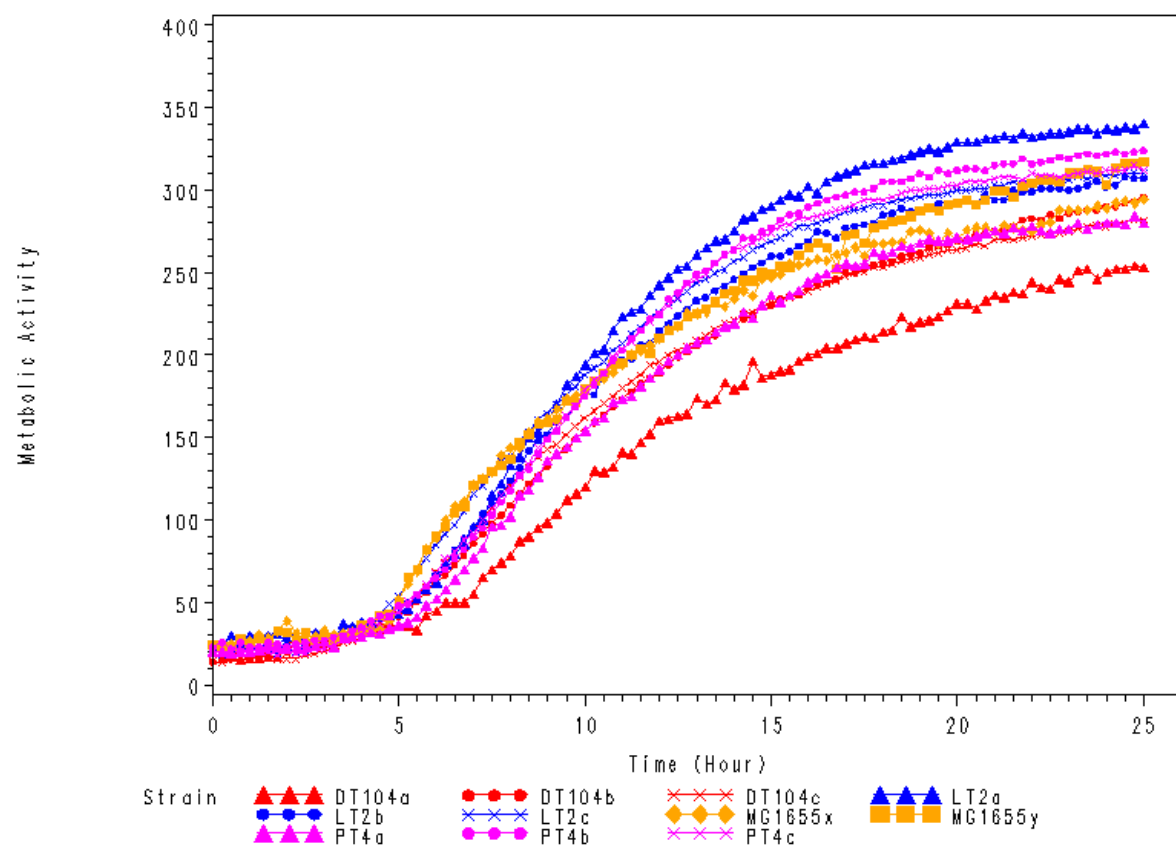

Kinetic Data of Carbon Source Utilisation

PM01, H01 (Glycyl-L-Proline)

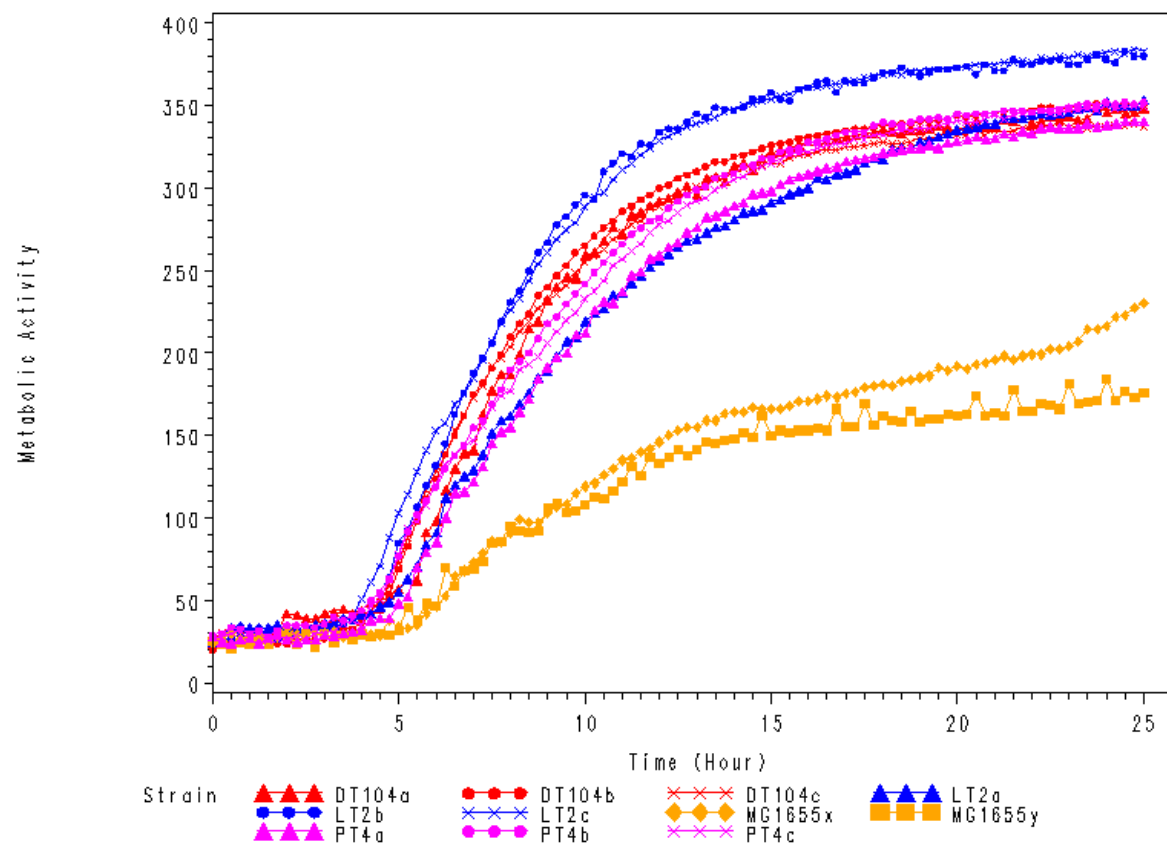

PM01, H02 (p-Hydroxy-Phenylacetic Acid)

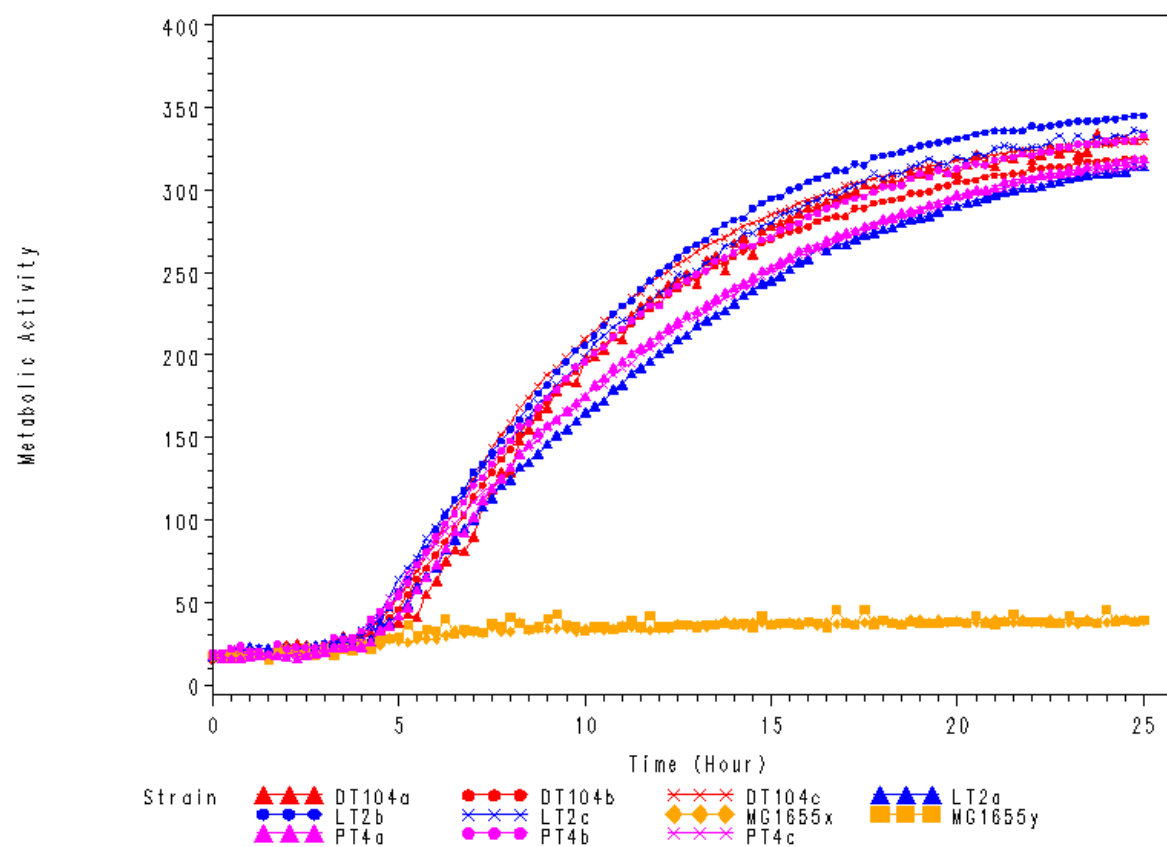

PM01, H03 (m-Hydroxy-Phenylacetic Acid)

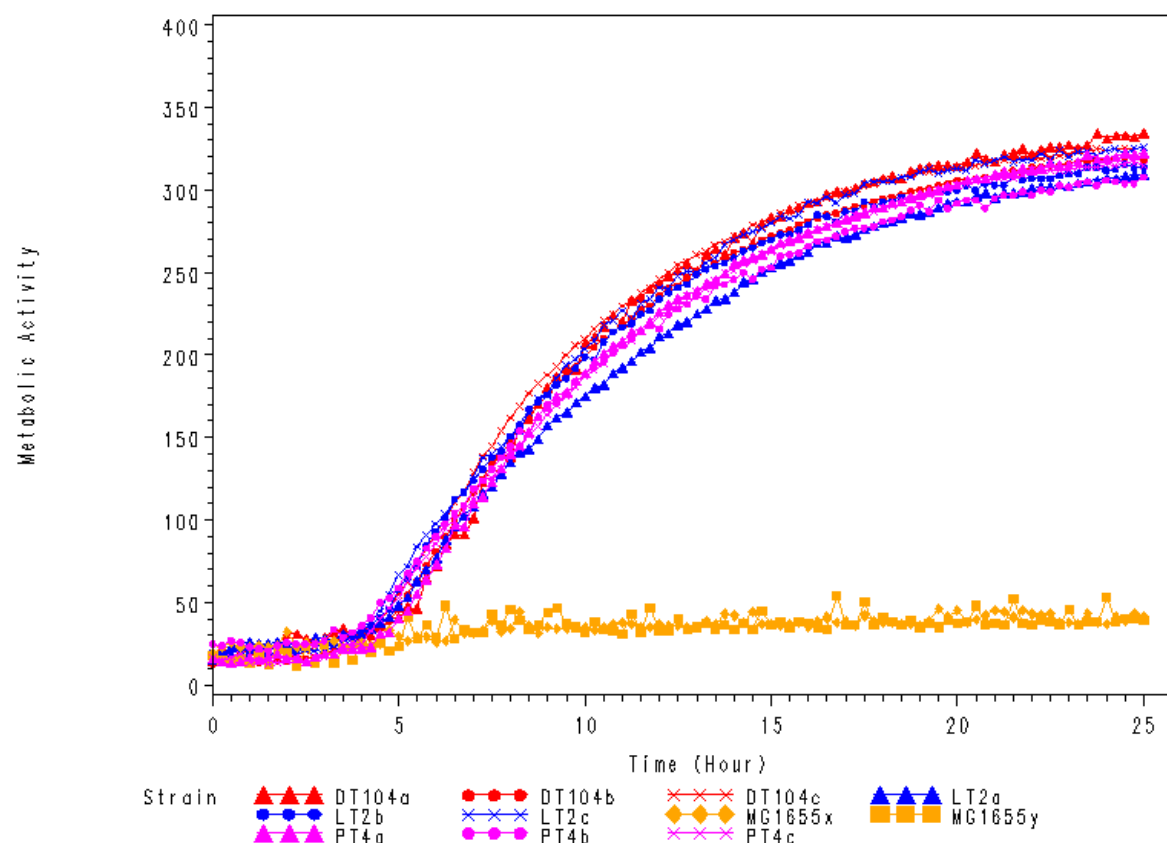

Kinetic Data of Carbon Source Utilisation

PM01, H04 (Tyramine)

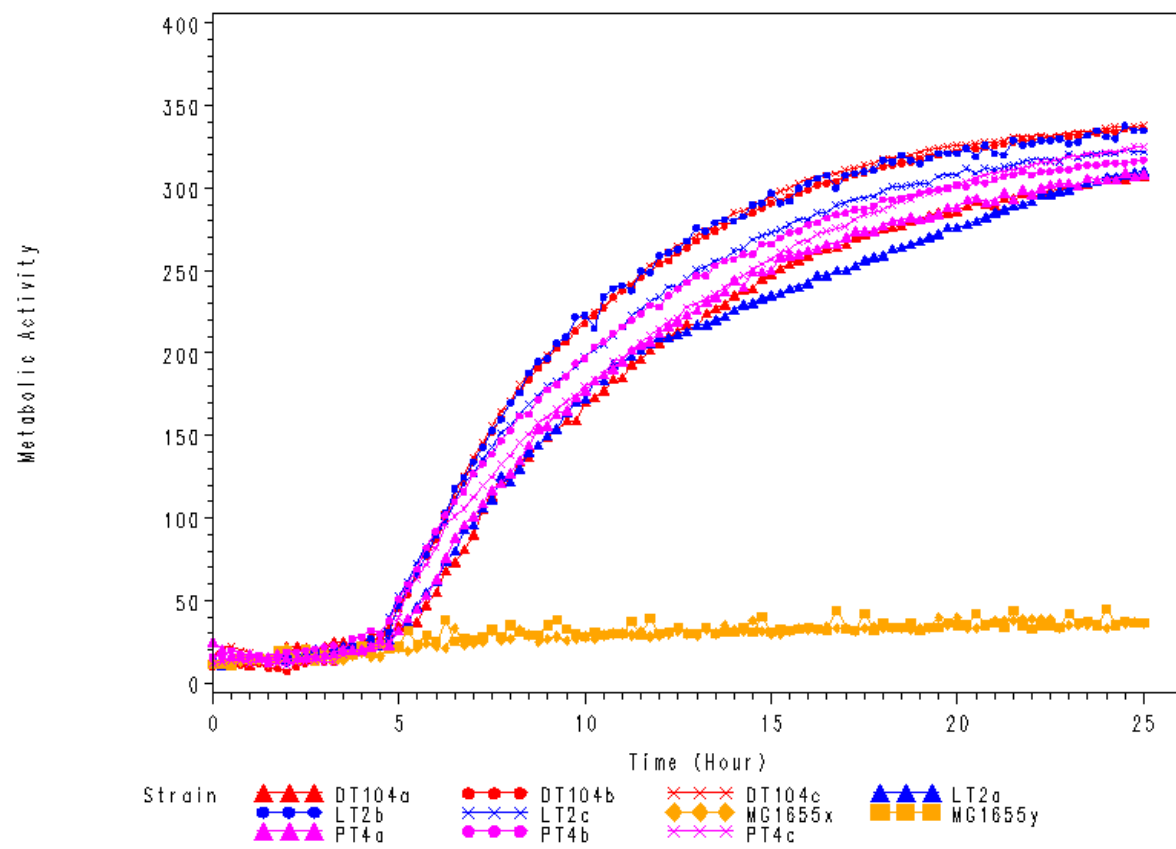

PM01, H05 (D-Psicose)

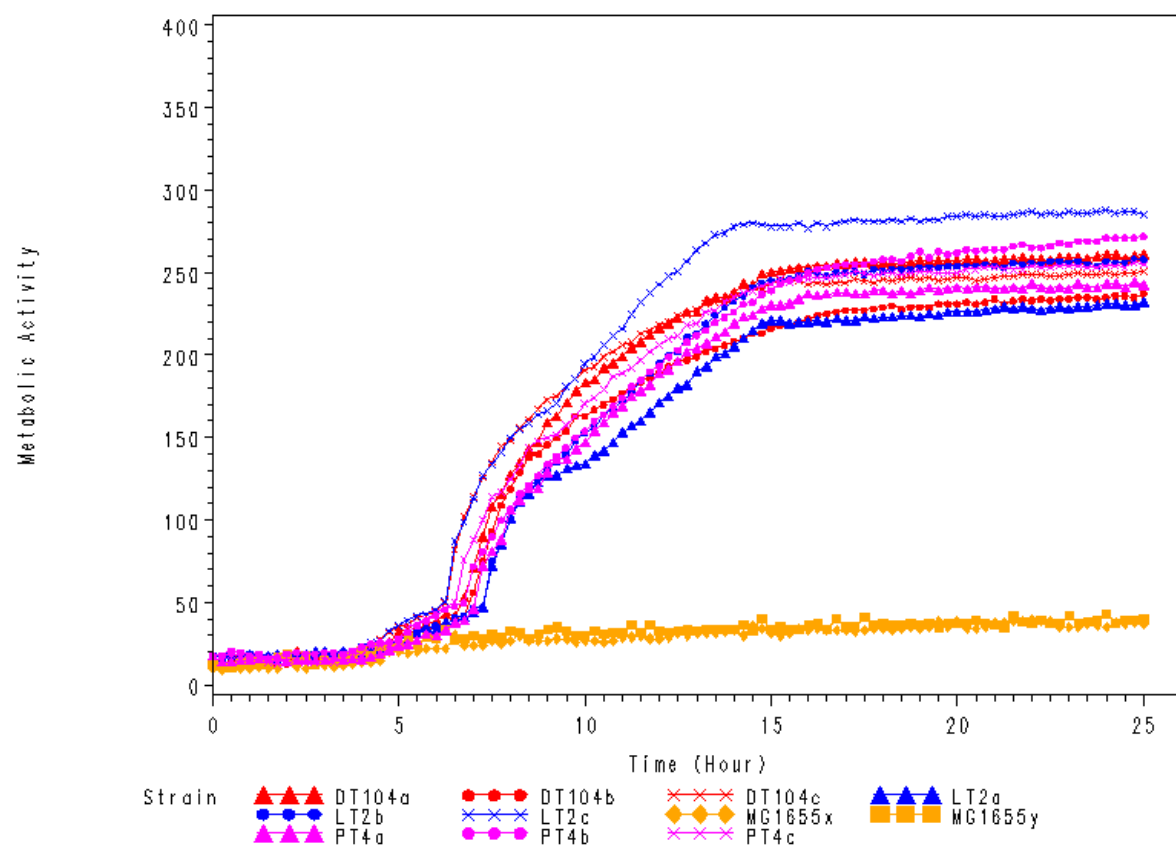

PM01, H06 (L-Lyxose)

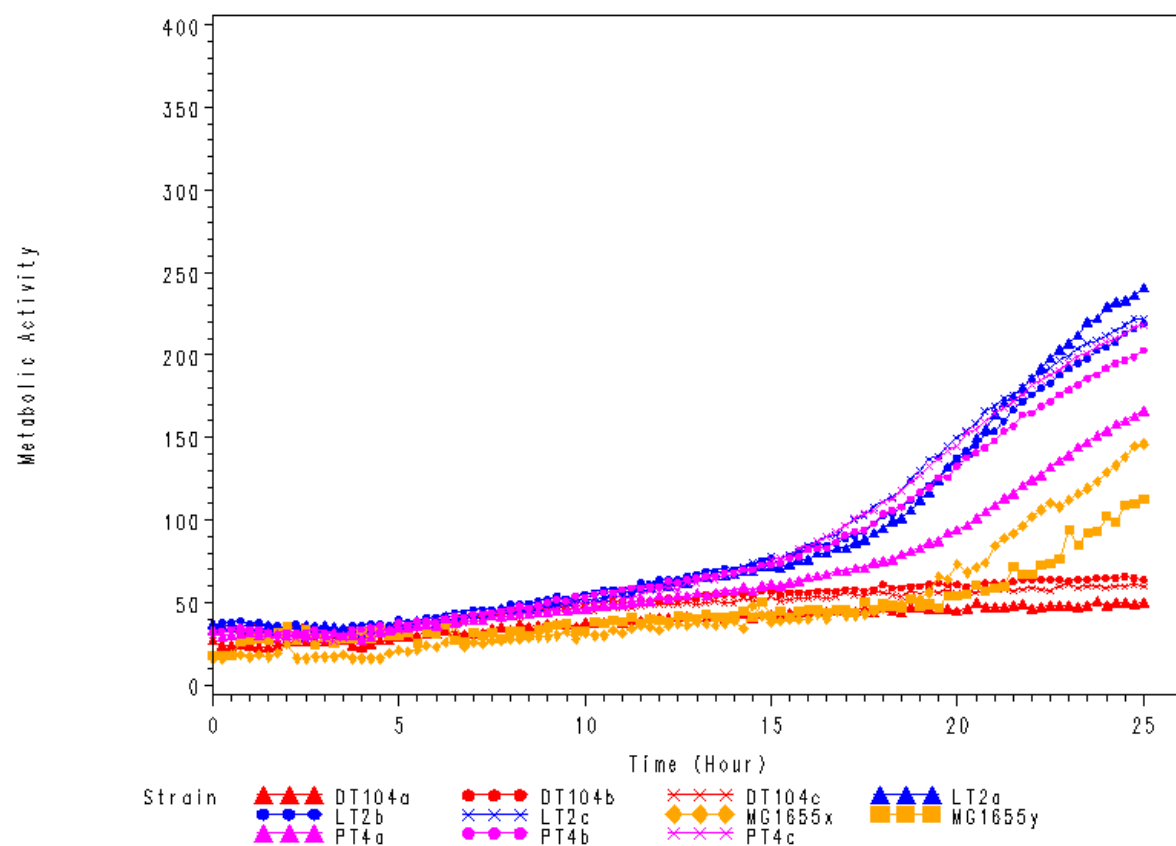

Kinetic Data of Carbon Source Utilisation

PM01, H07 (Glucuronamide)

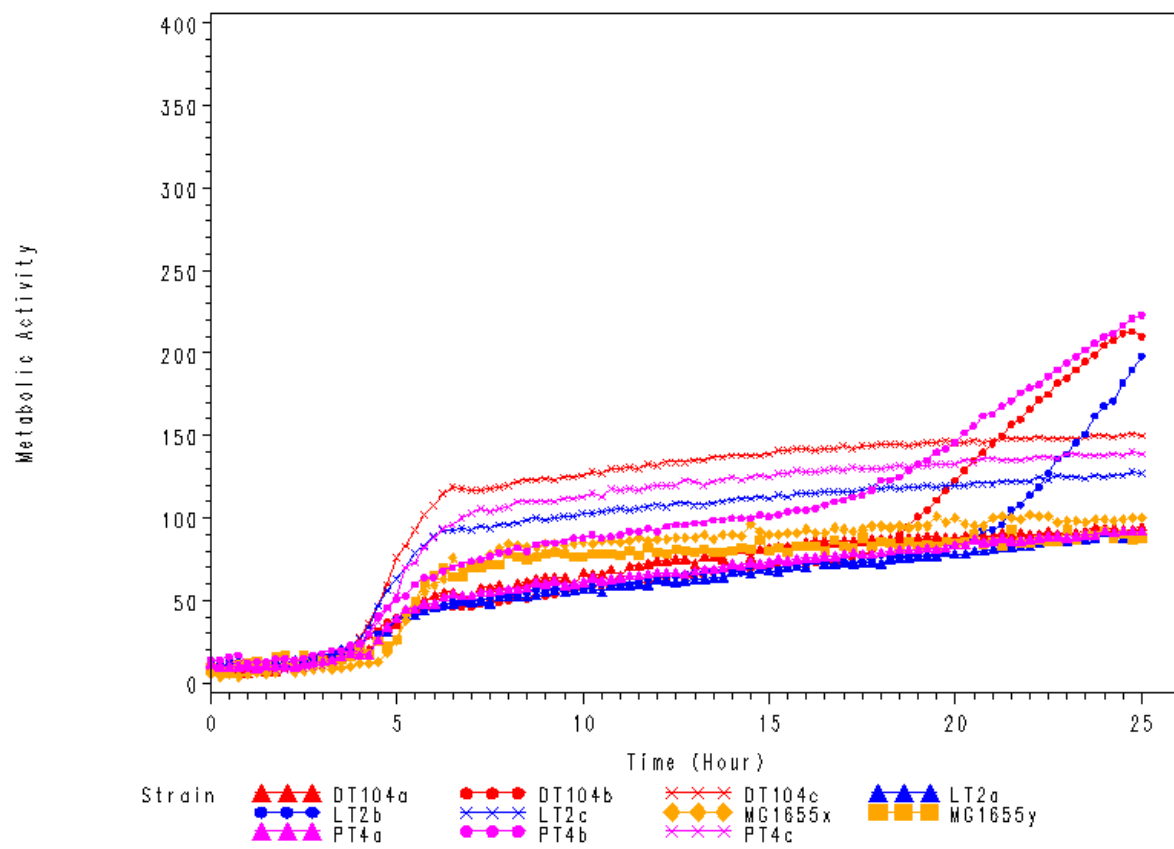

PM01, H08 (Pyruvic Acid)

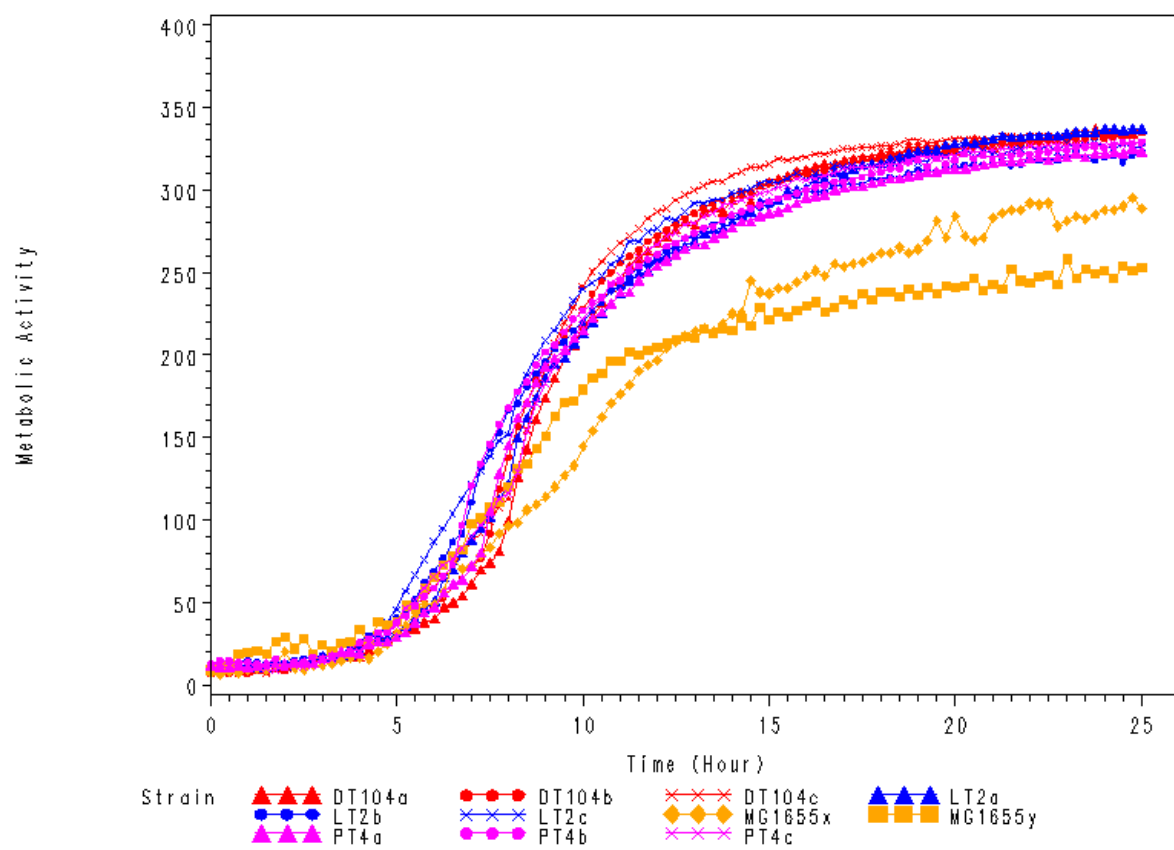

PM01, H09 (L-Galactonic Acid-g-Lactone)

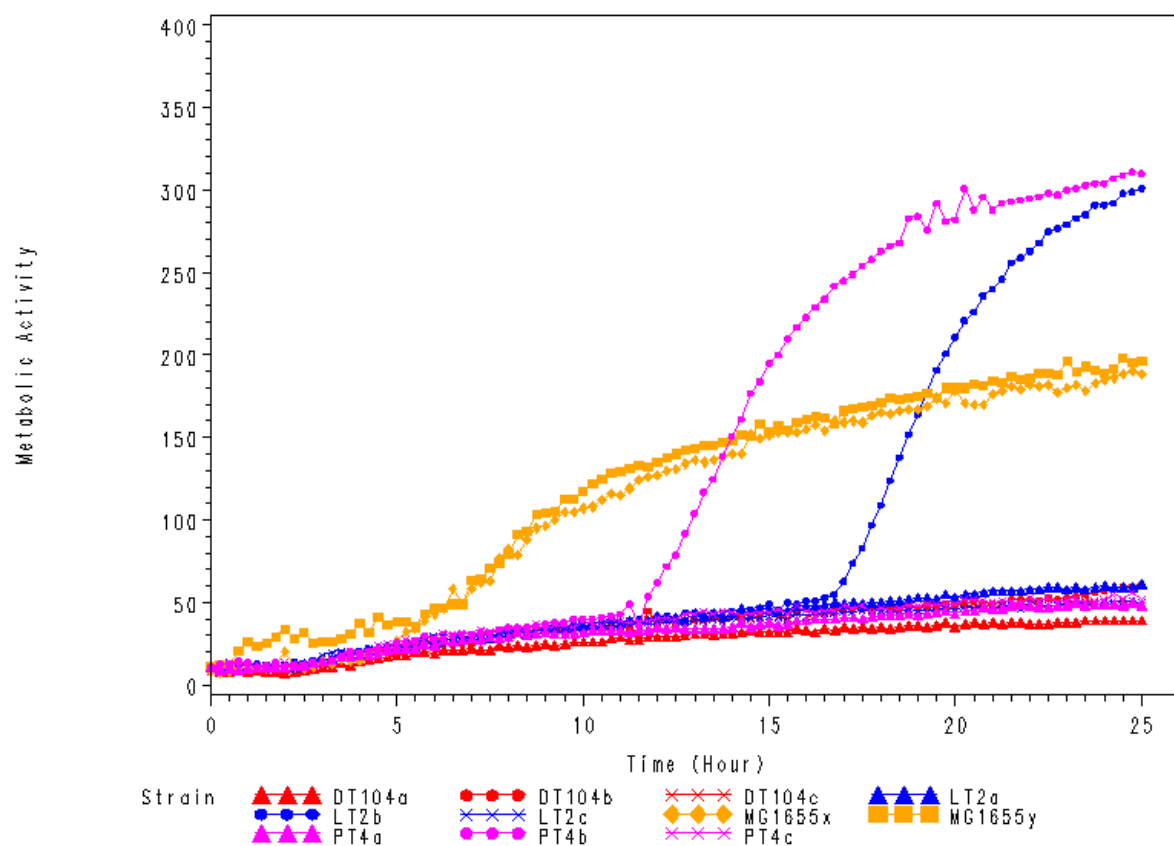

Kinetic Data of Carbon Source Utilisation

PM01, H10 (D-Galacturonic Acid)

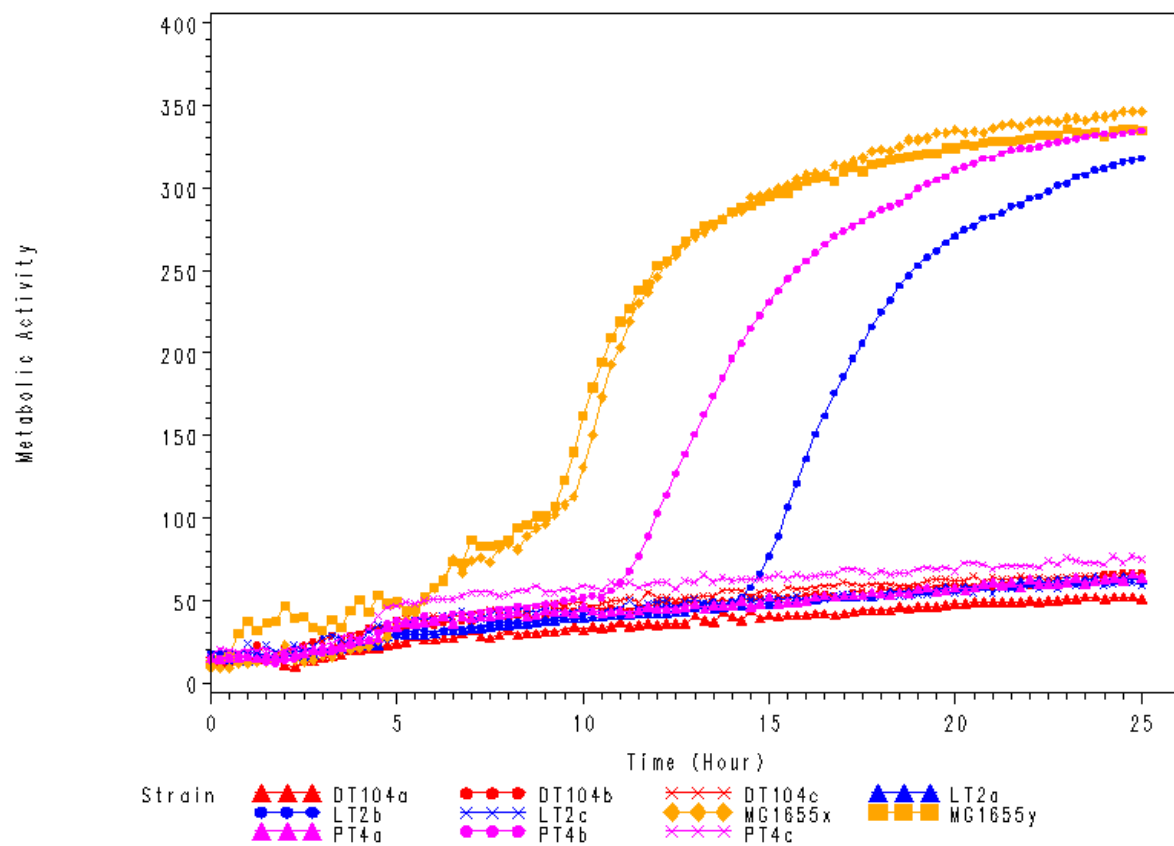

PM01, H11 (β-Phenylethylamine)

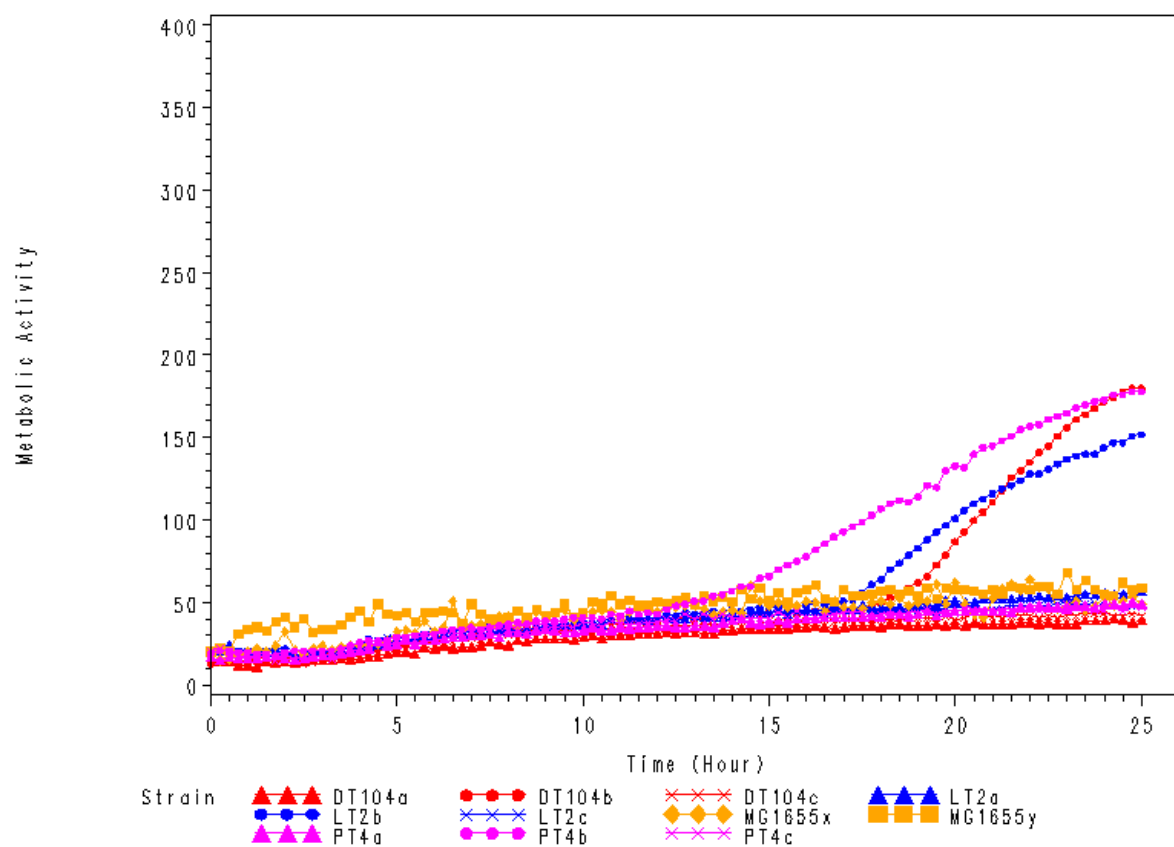

PM01, H12 (Ethanolamine)

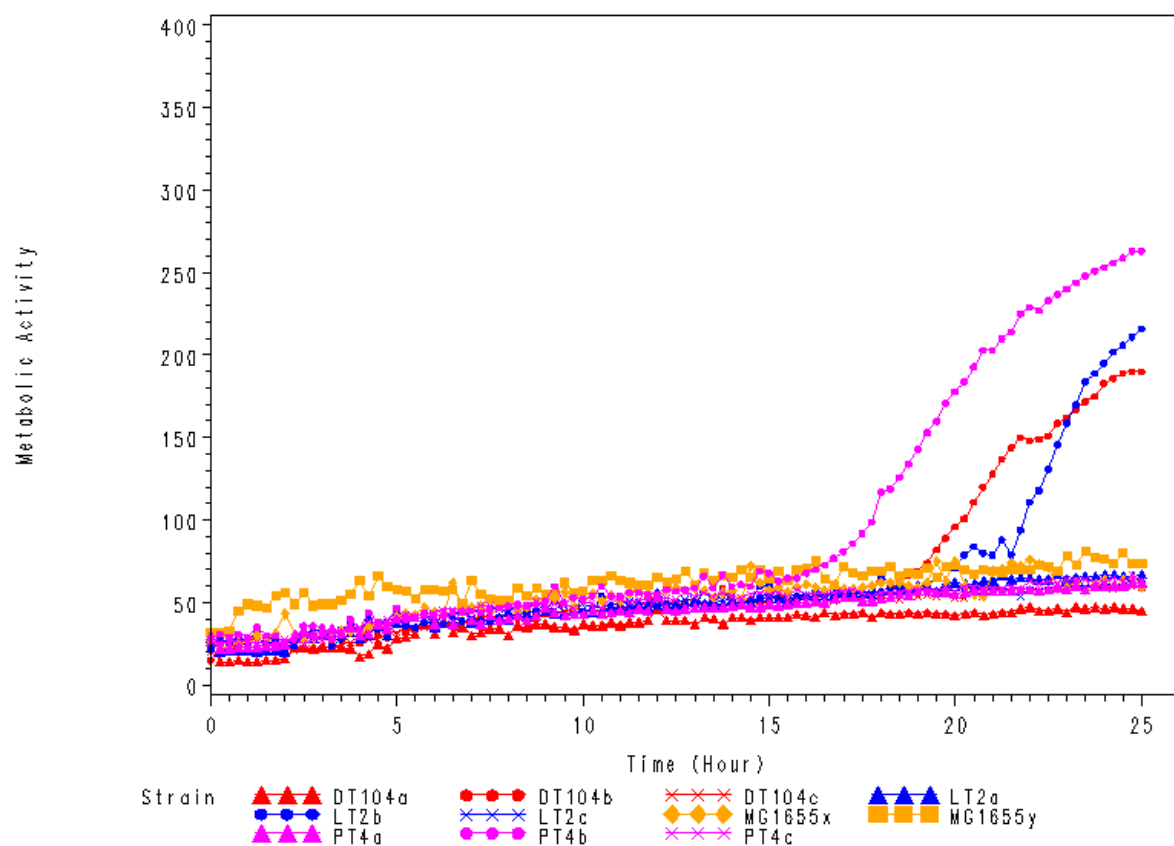



Kinetic Data of Carbon Source Utilisation

PM02A, A01 (Negative Control)

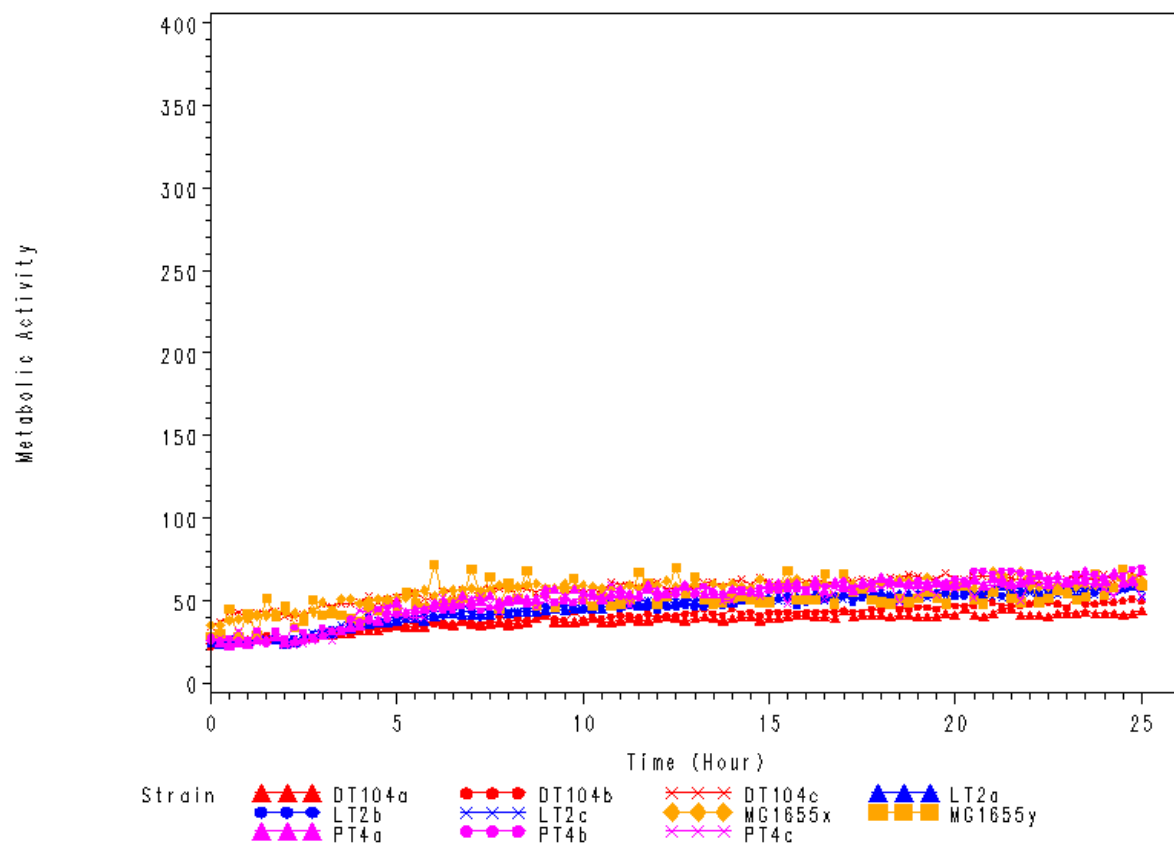

PM02A, A02 (Chondroitin Sulfate C)

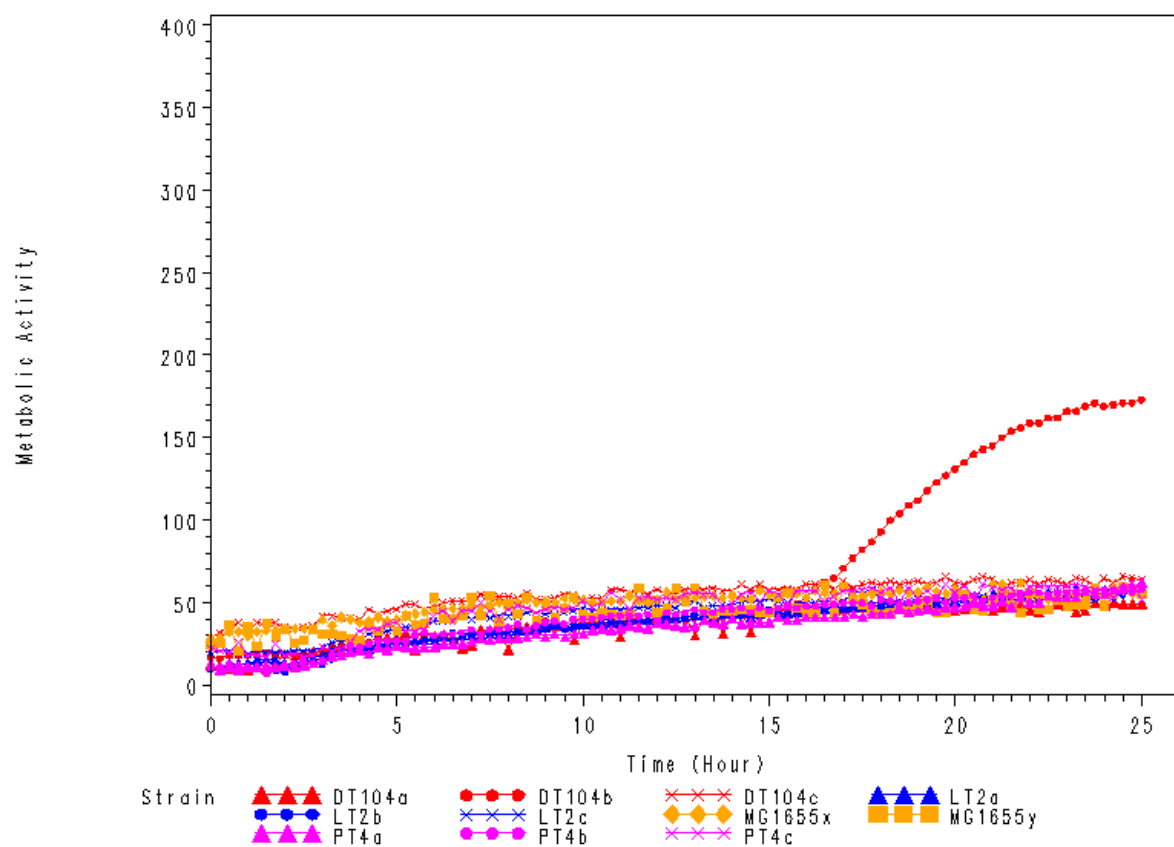

PM02A, A03 ( $\alpha$ -Cyclodextrin)

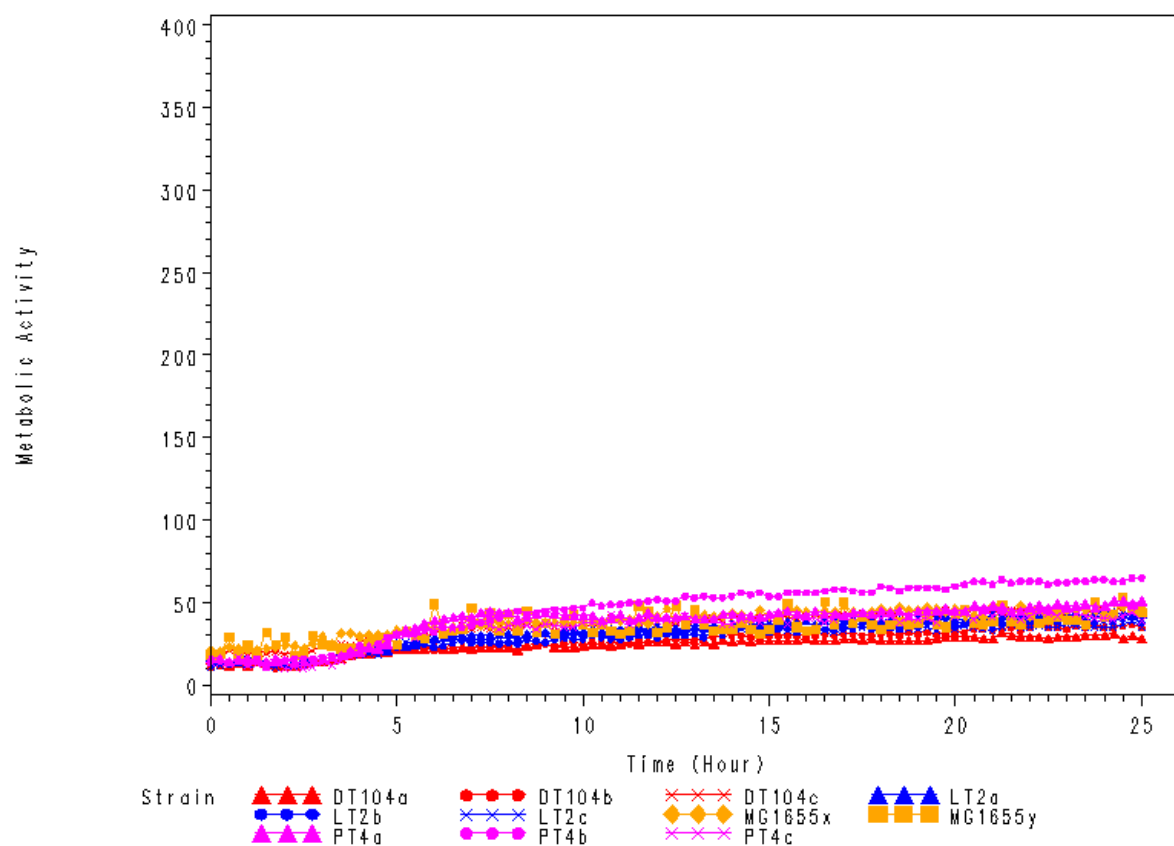

Kinetic Data of Carbon Source Utilisation

PM02A, A04 (b – Cyclodextrin)

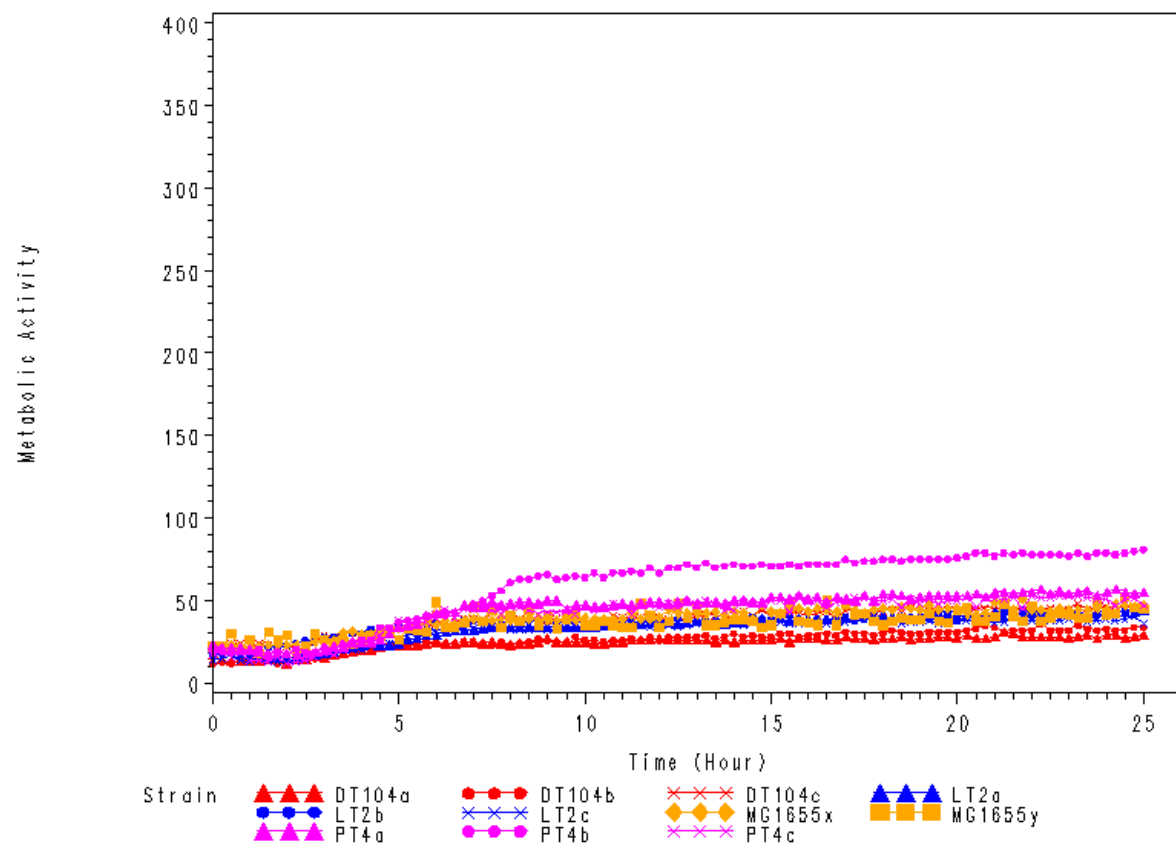

PM02A, A05 (g – Cyclodextrin)

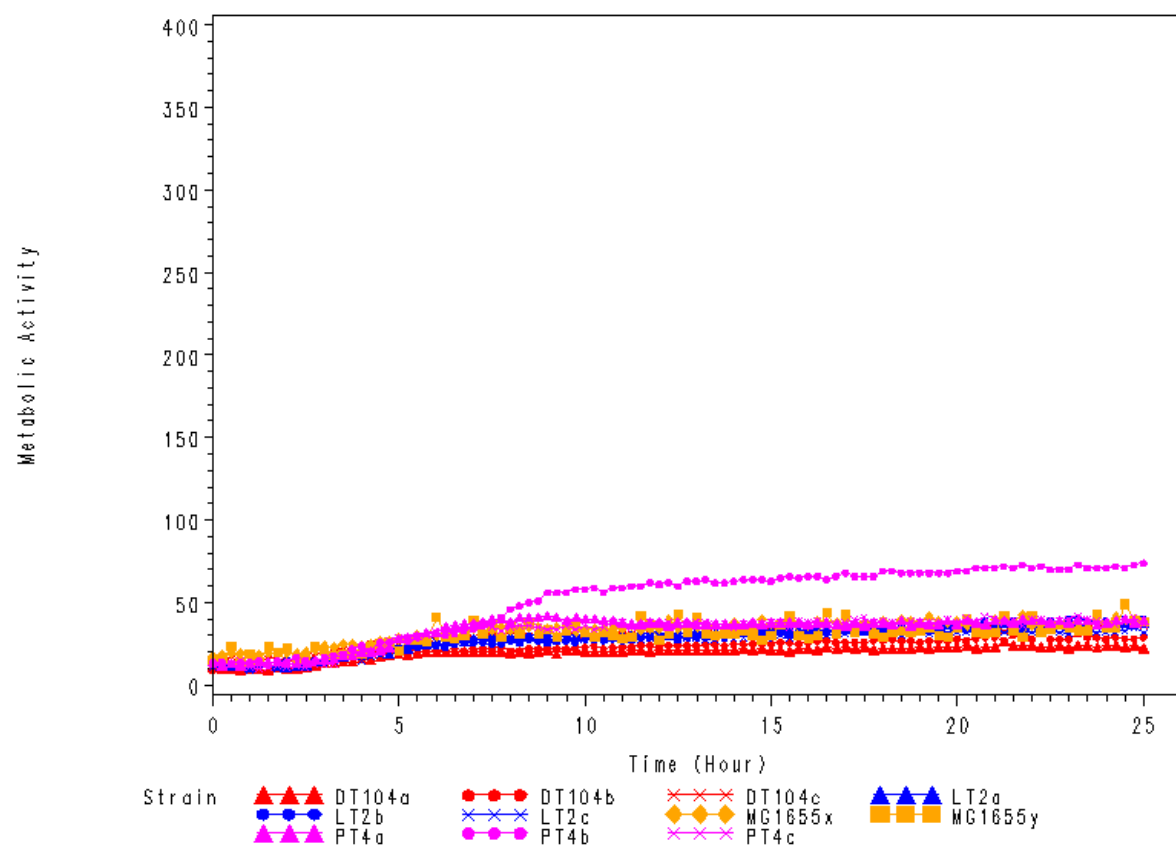

PM02A, A06 (Dextrin)

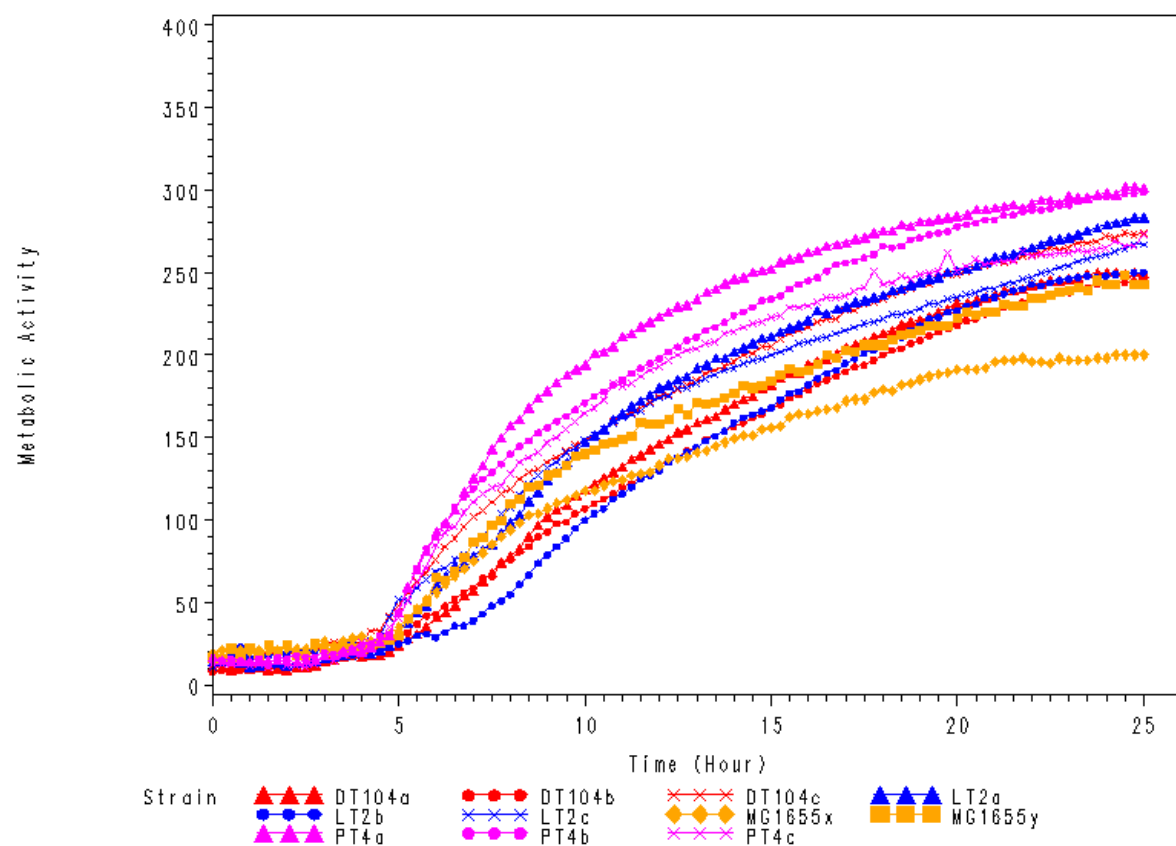

Kinetic Data of Carbon Source Utilisation

PM02A, A07 (Gelatin)

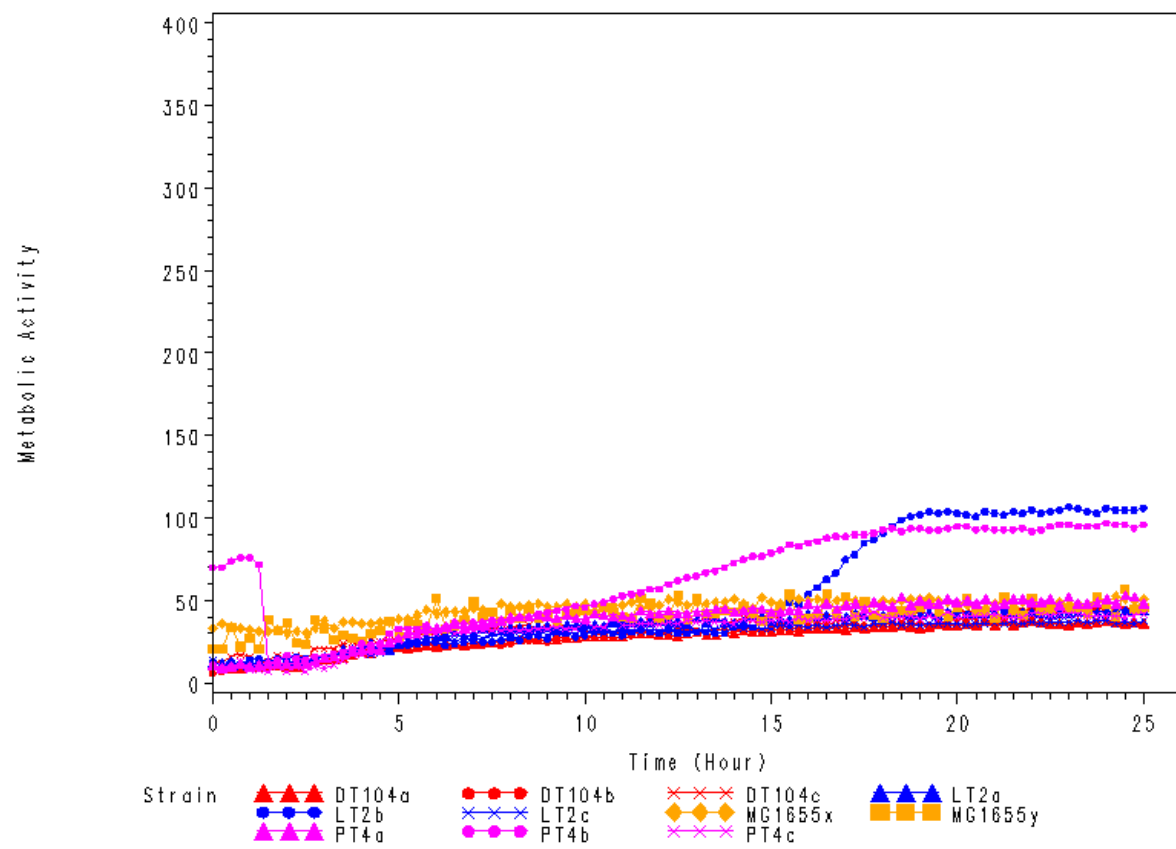

PM02A, A08 (Glycogen)

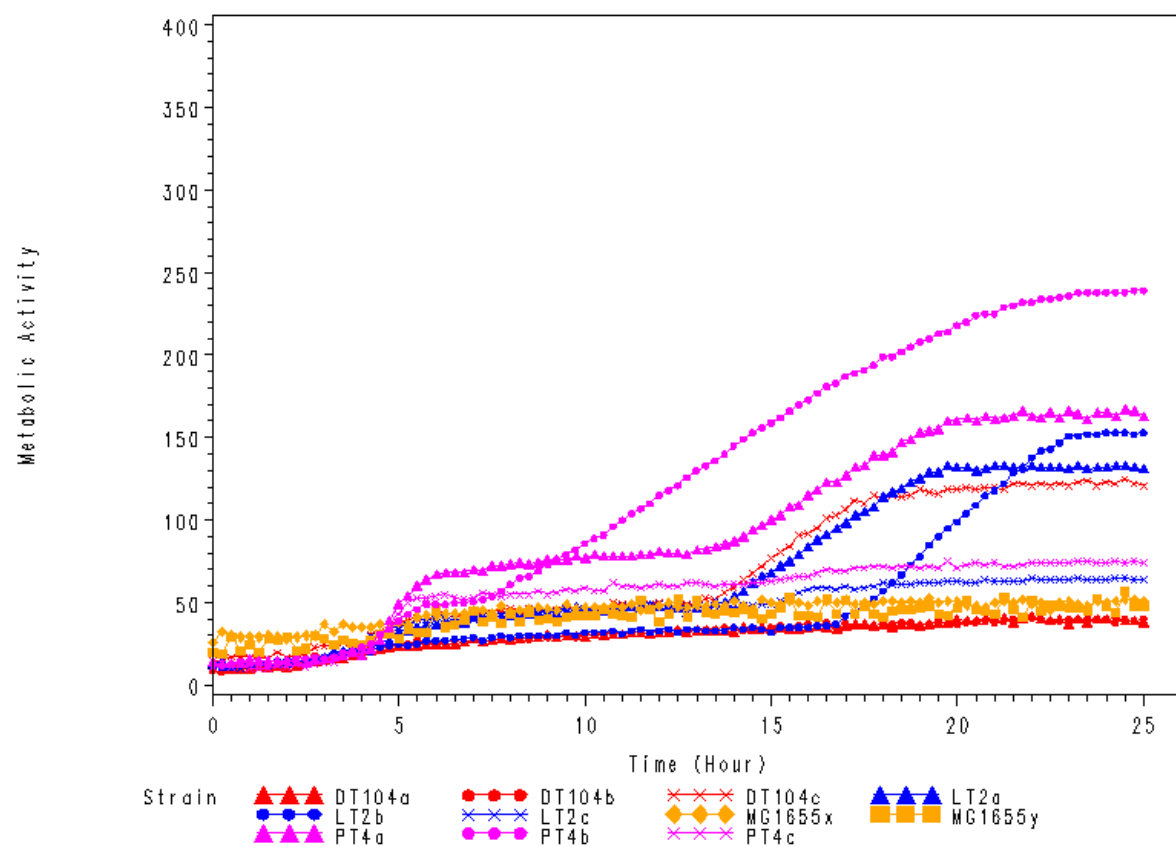

PM02A, A09 (Inulin)

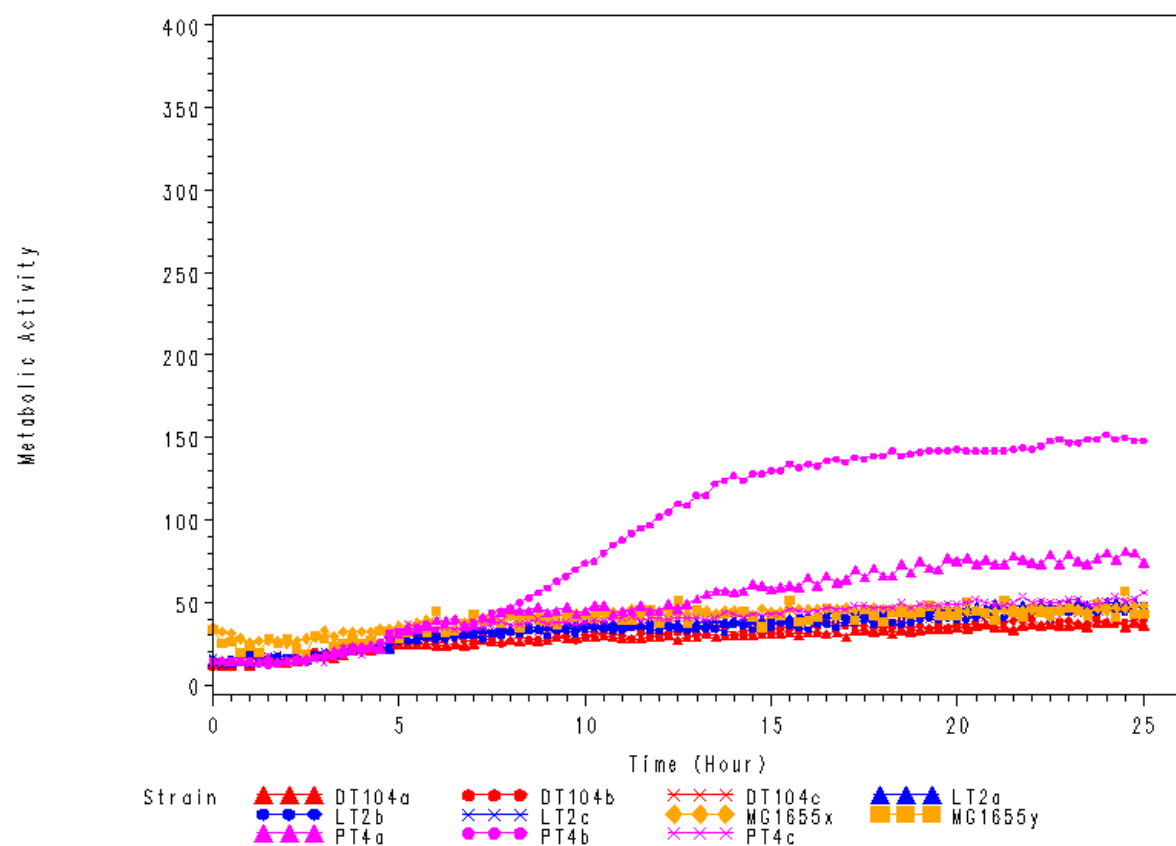

Kinetic Data of Carbon Source Utilisation

PM02A, A10 (Laminarin)

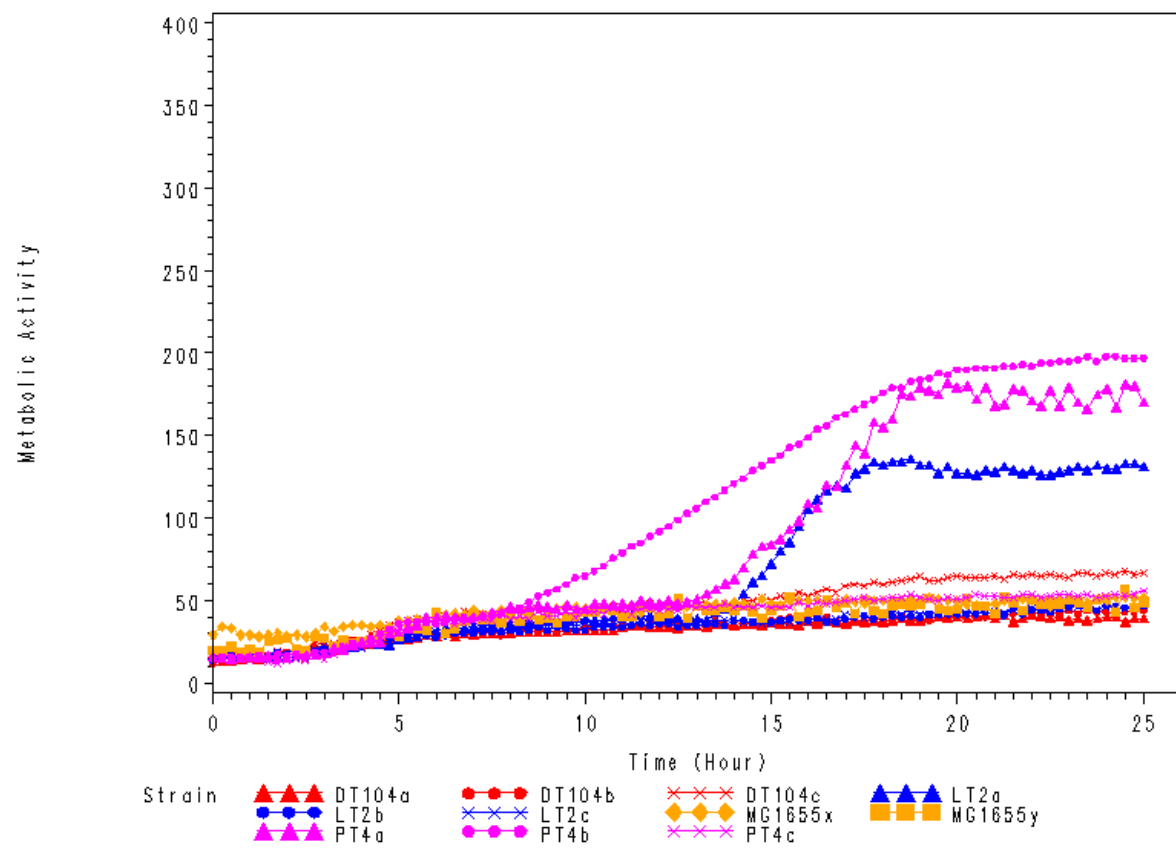

PM02A, A11 (Mannan)

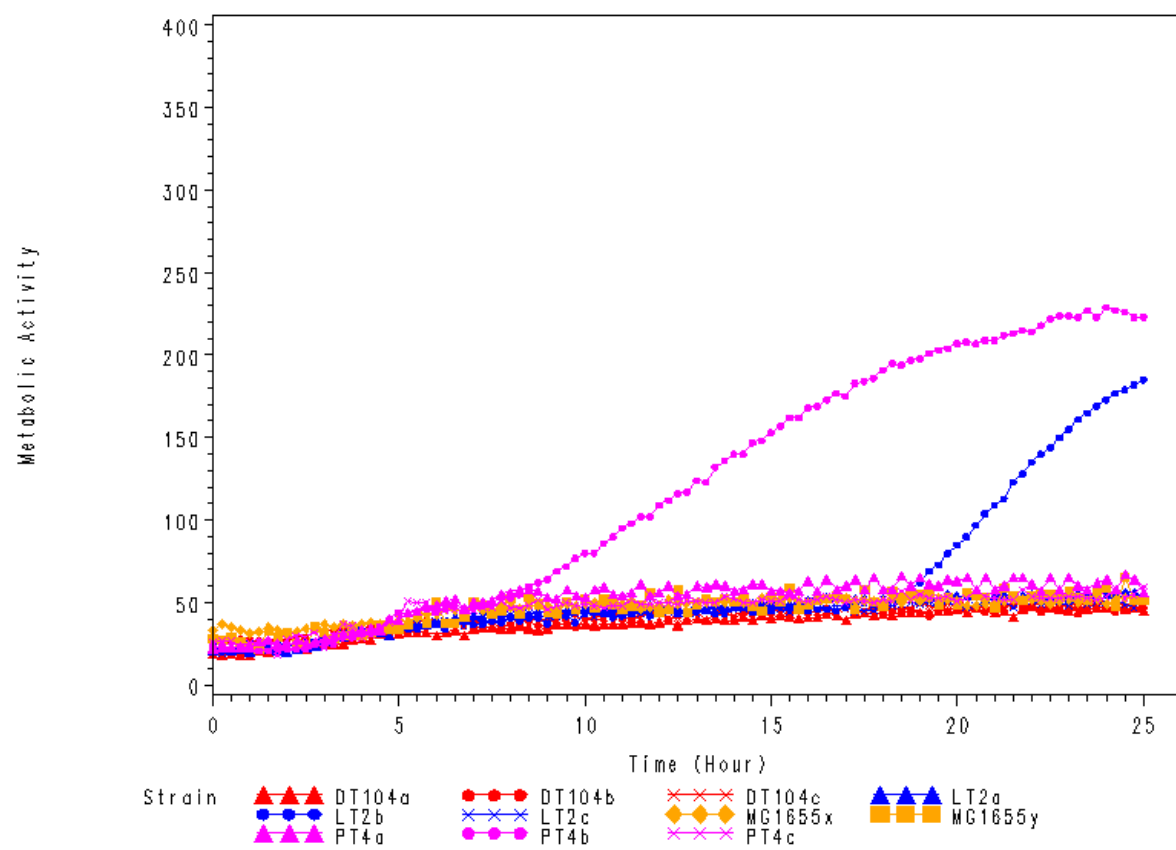

PM02A, A12 (Pectin)

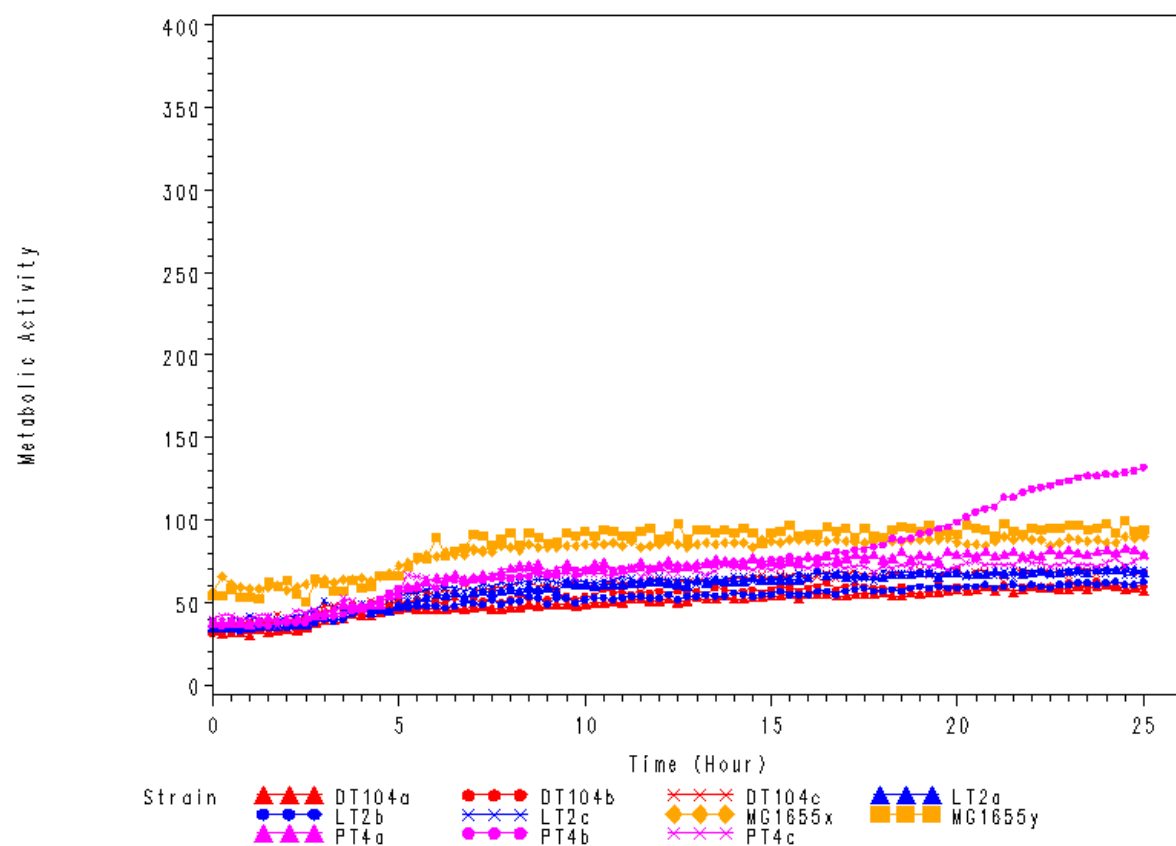

Kinetic Data of Carbon Source Utilisation

PM02A, B01 (N-Acetyl-D-Galactosamine)

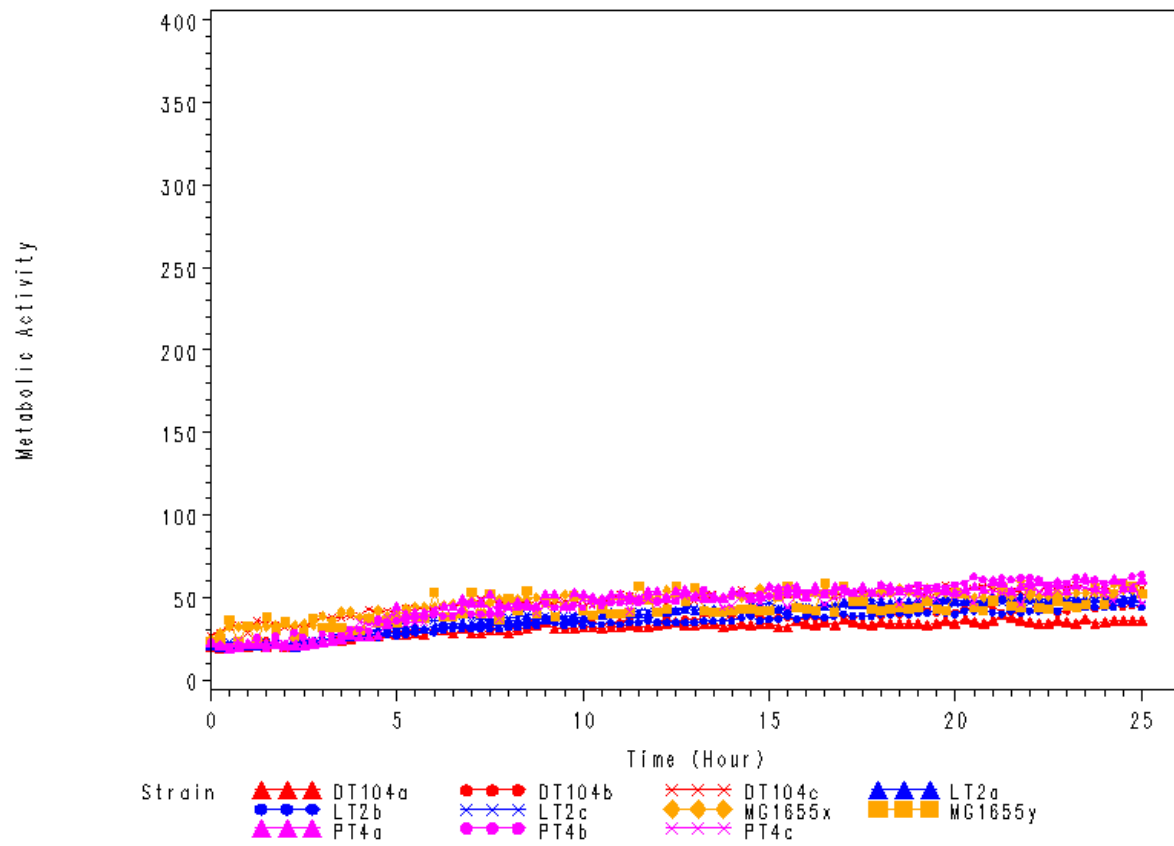

PM02A, B02 (N-Acetyl-Neuraminic Acid)

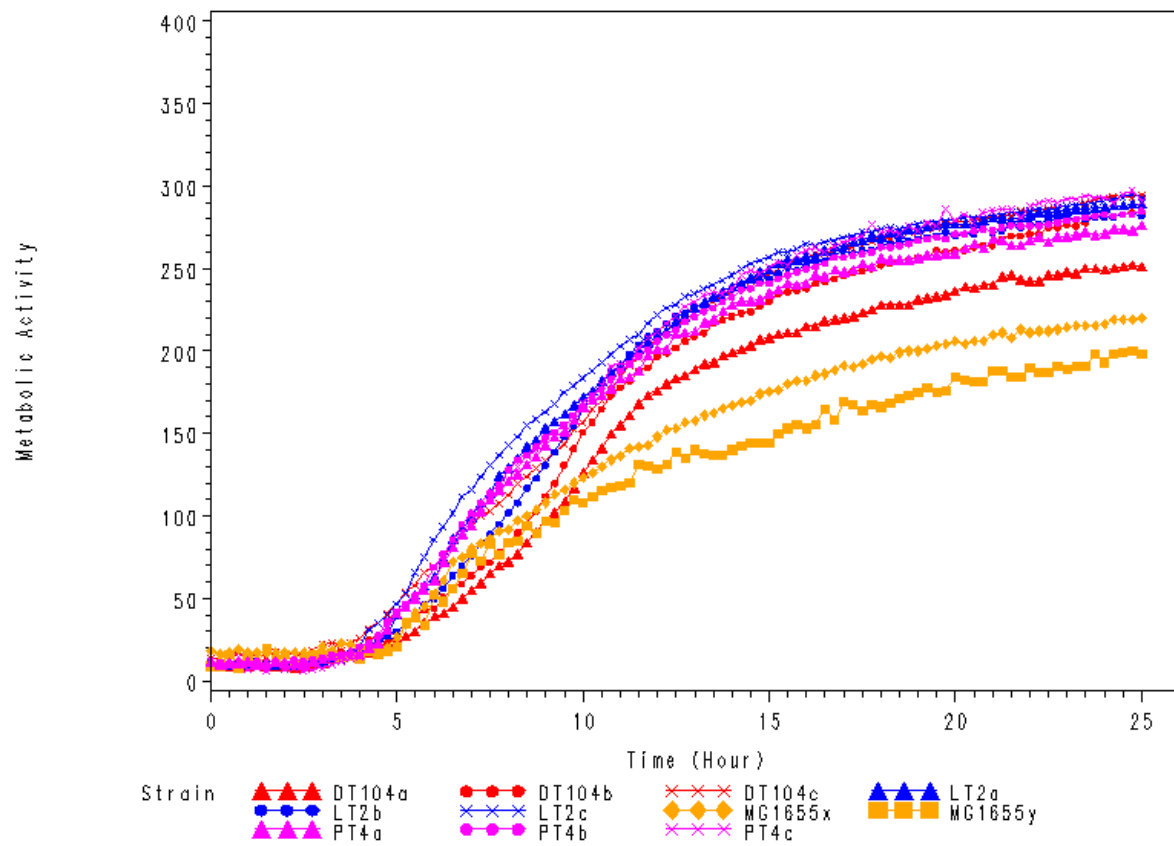

PM02A, B03 (b-D-Allose)

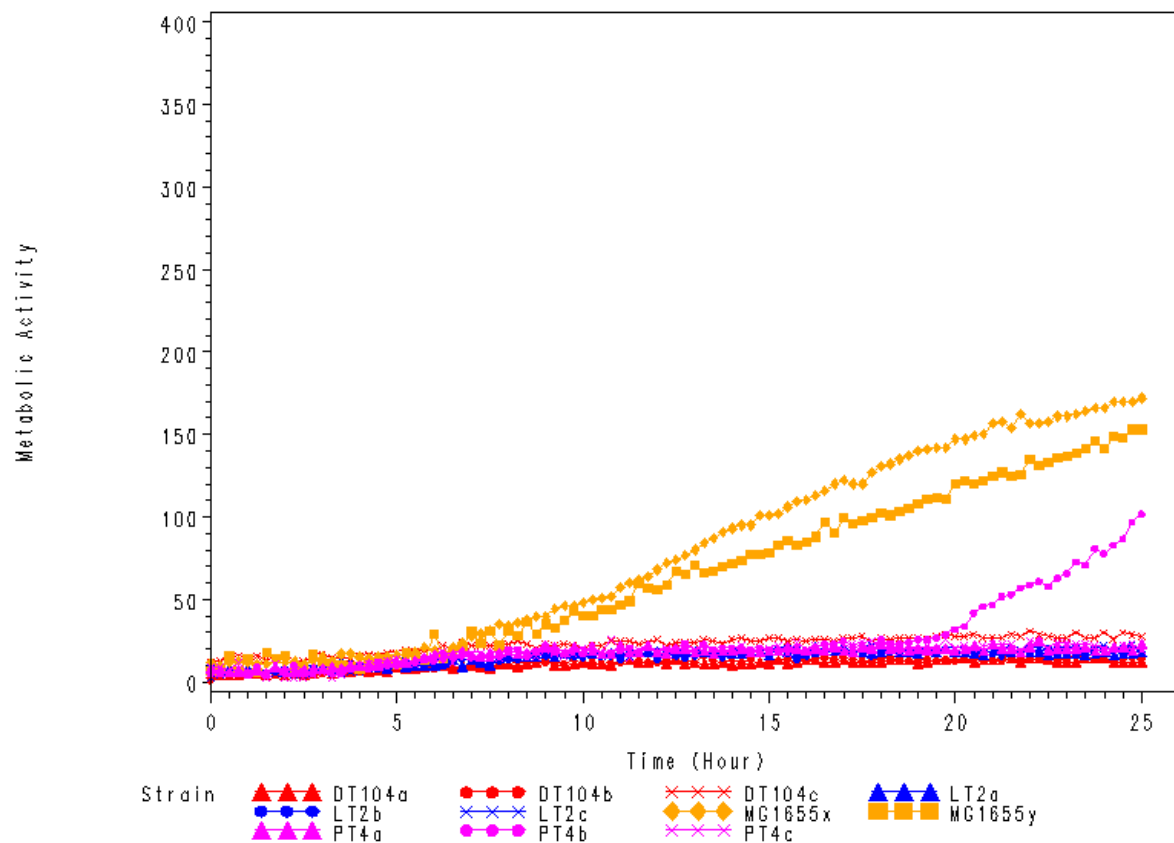

Kinetic Data of Carbon Source Utilisation

PM02A, B04 (Amygdalin)

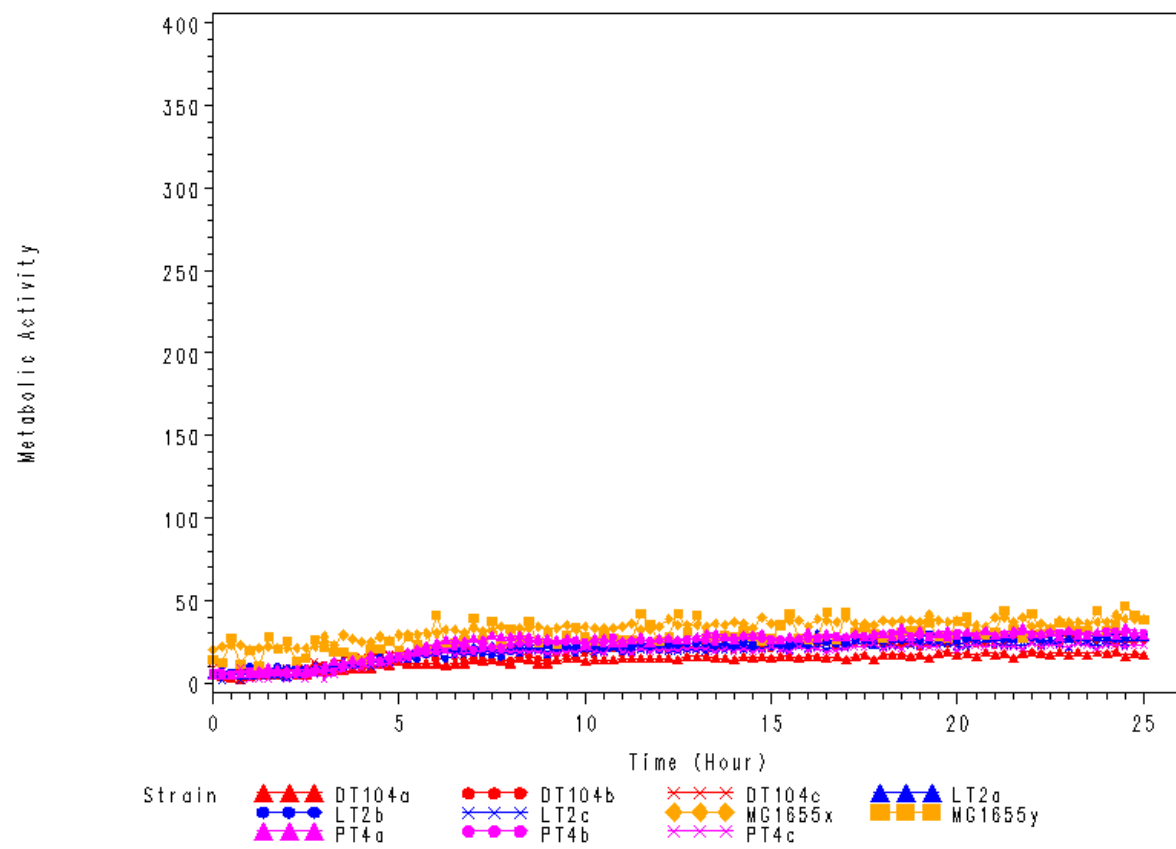

PM02A, B05 (D-Arabinose)

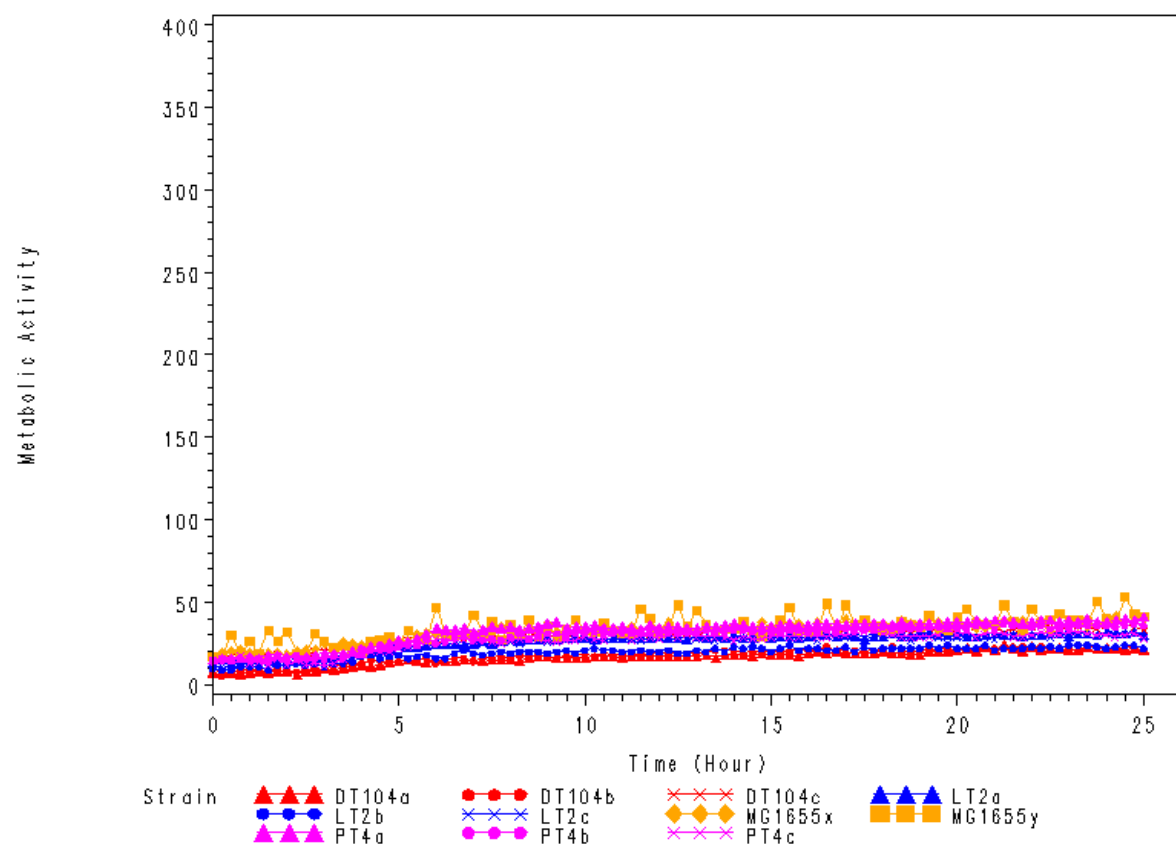

PM02A, B06 (D-Arabitol)

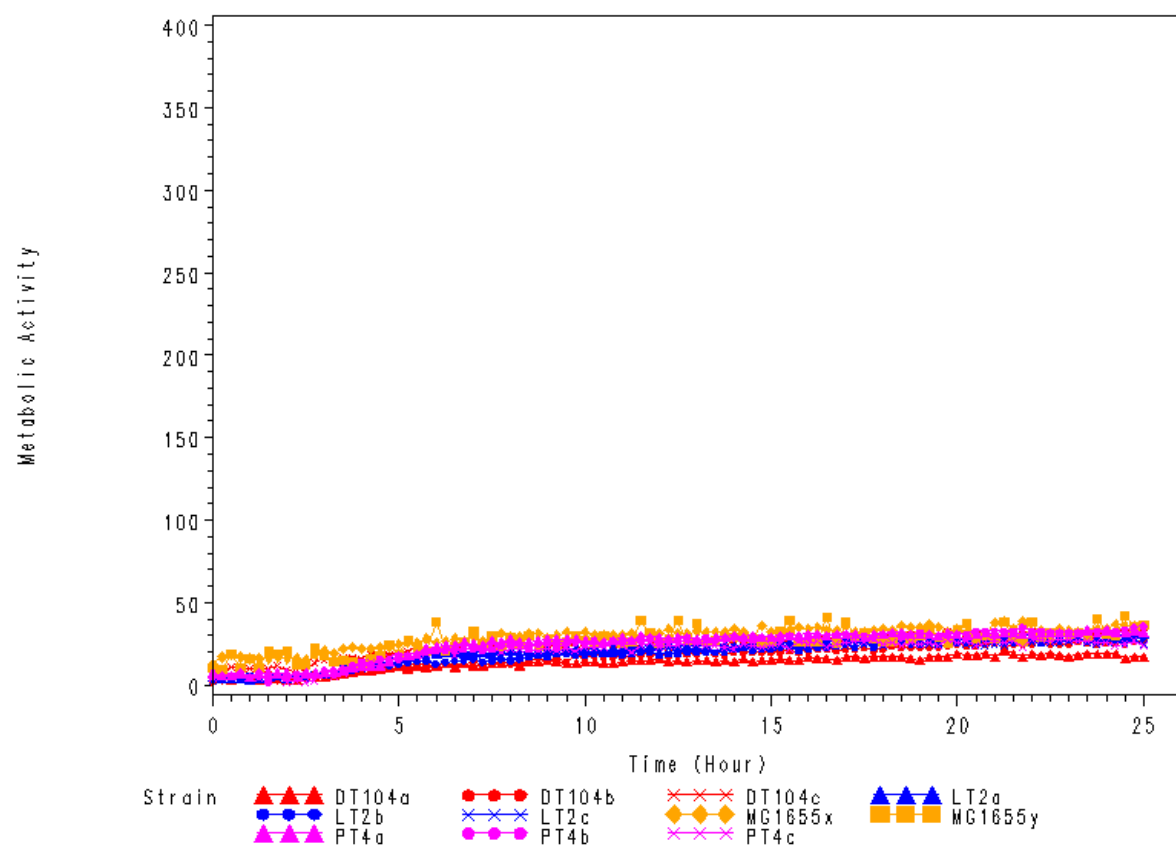

Kinetic Data of Carbon Source Utilisation

PM02A, B07 (L-Arabinol)

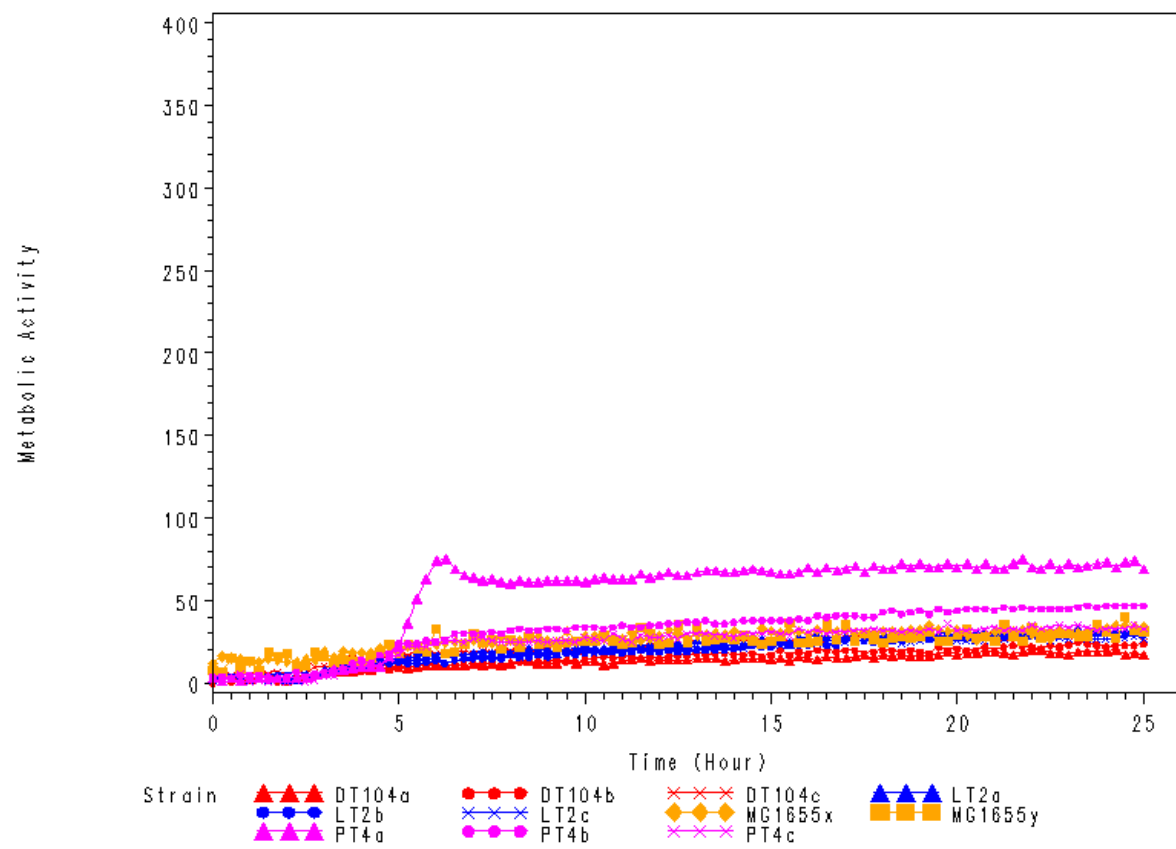

PM02A, B08 (Arbutin)

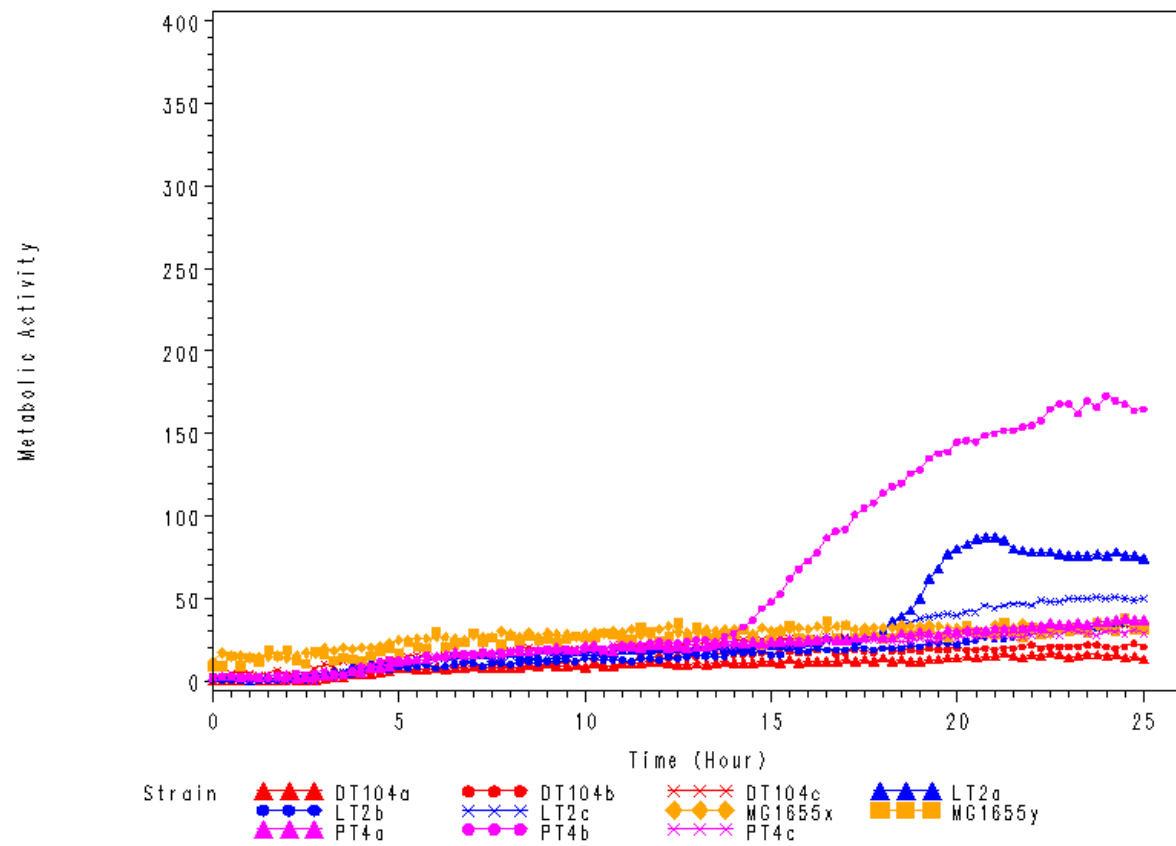

PM02A, B09 (2-Deoxy-D-Ribose)

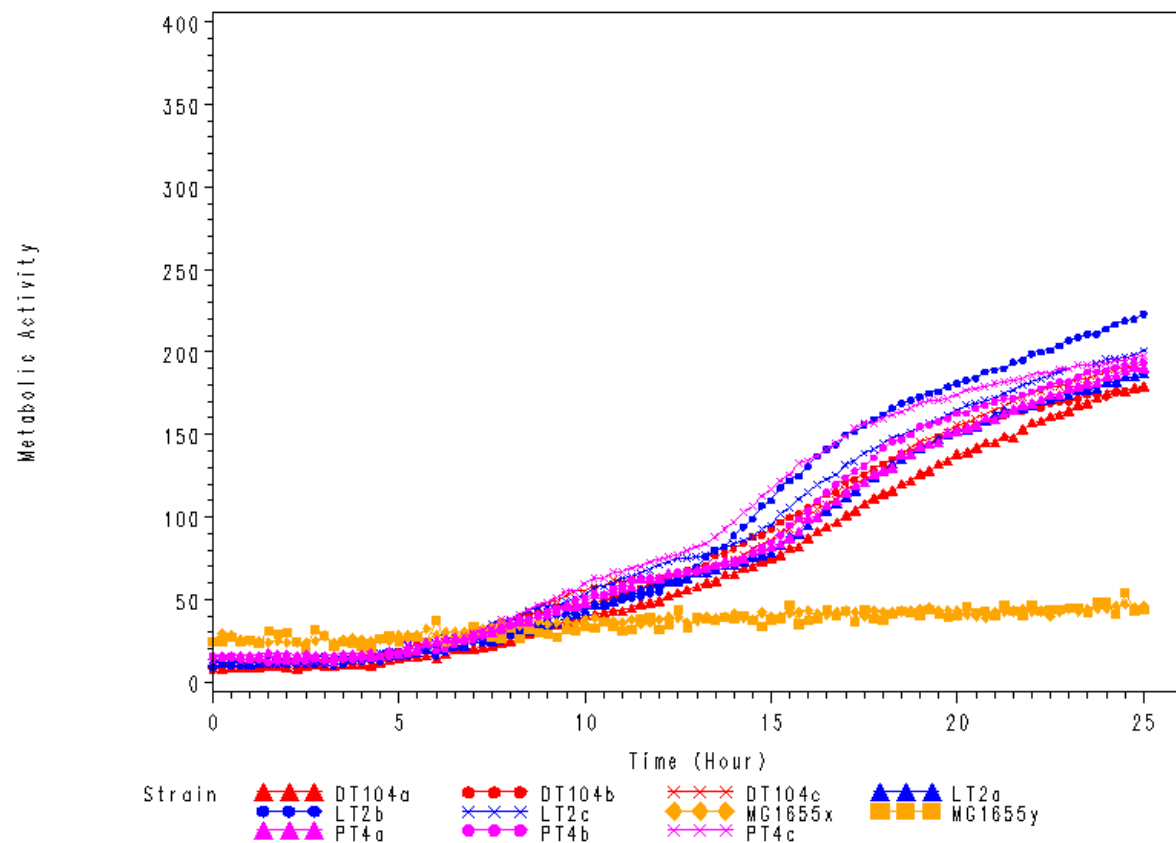

Kinetic Data of Carbon Source Utilisation

PM02A, B10 (i-Erythritol)

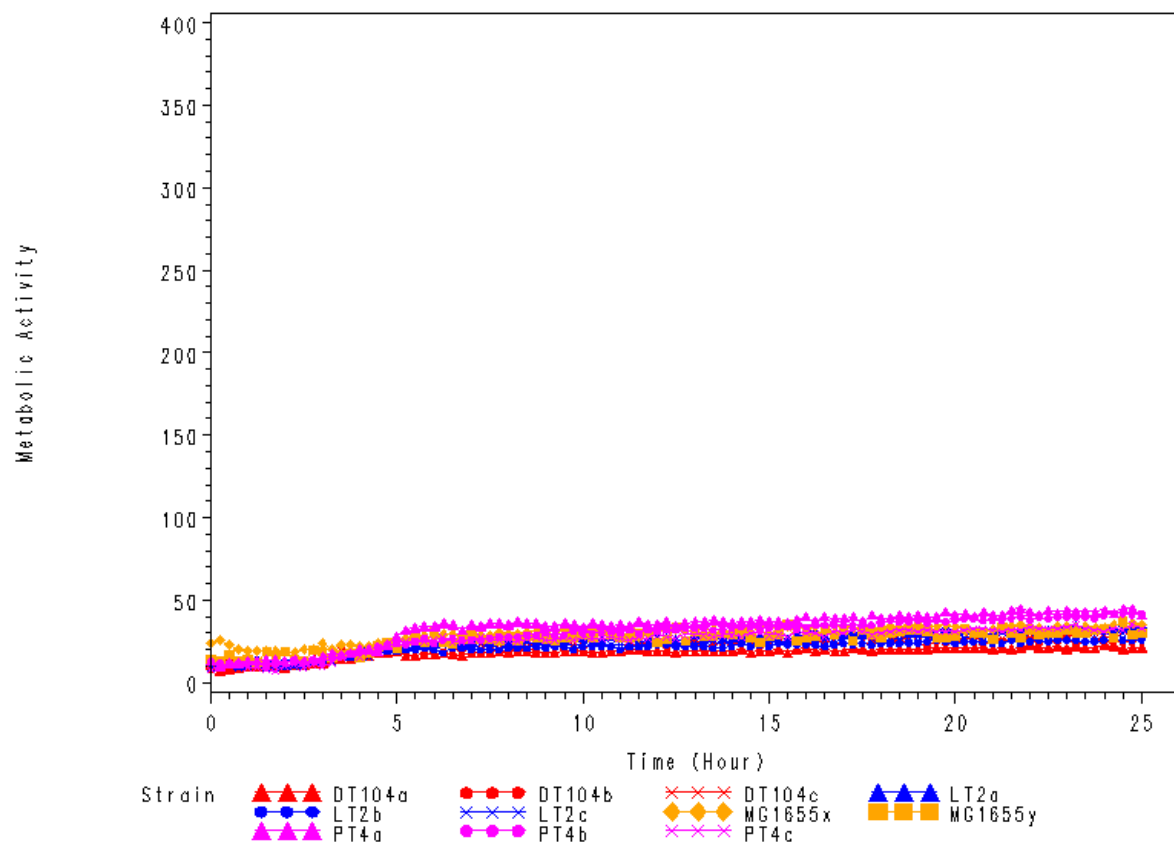

PM02A, B11 (D-Fucose)

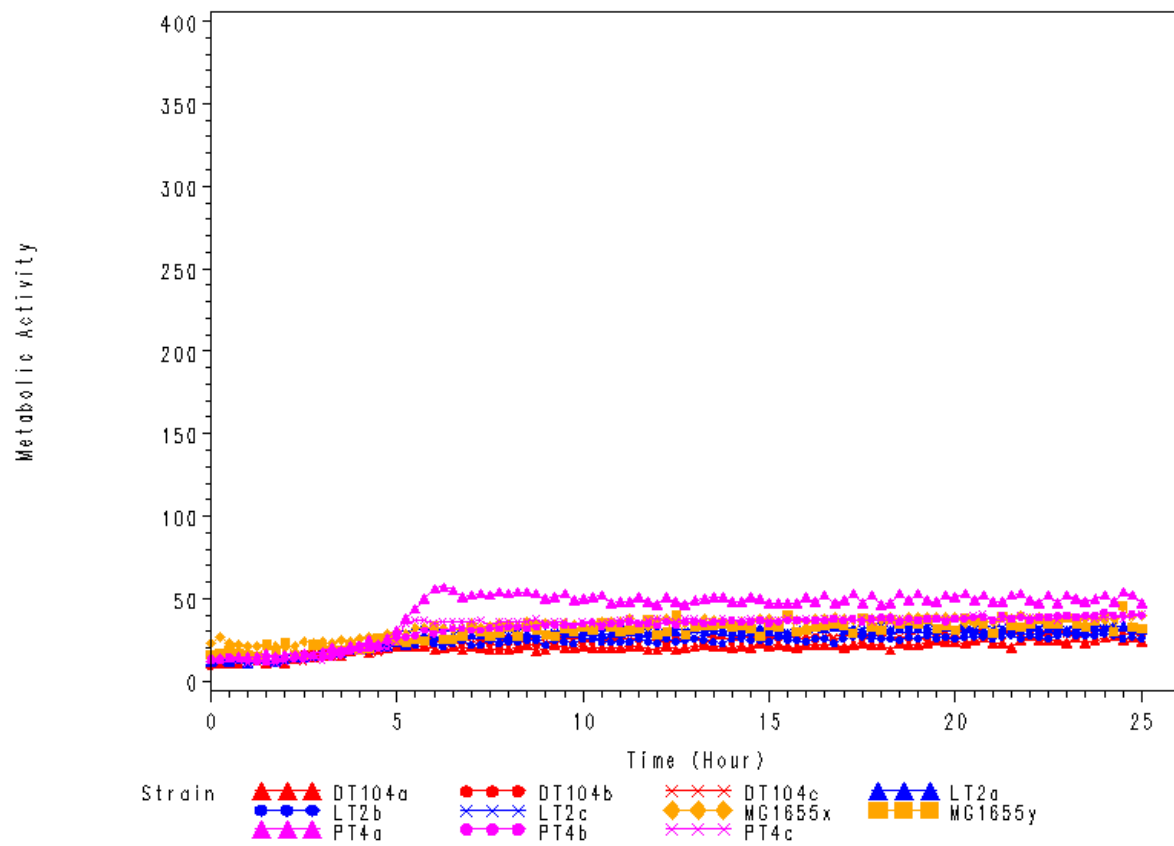

PM02A, B12 (3-O-b-D-Galacto-pyranosyl-D-Arabinose)

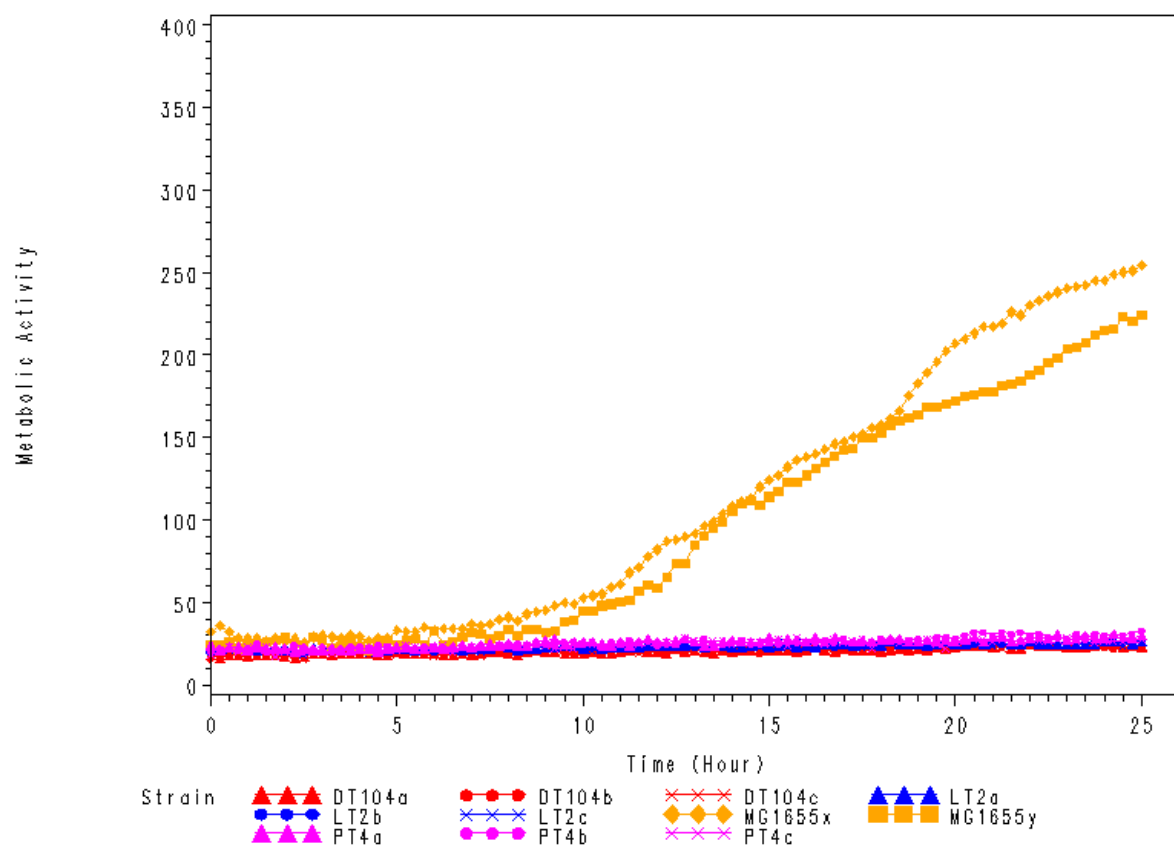



Kinetic Data of Carbon Source Utilisation

PM02A, C01 (Gentiobiose)

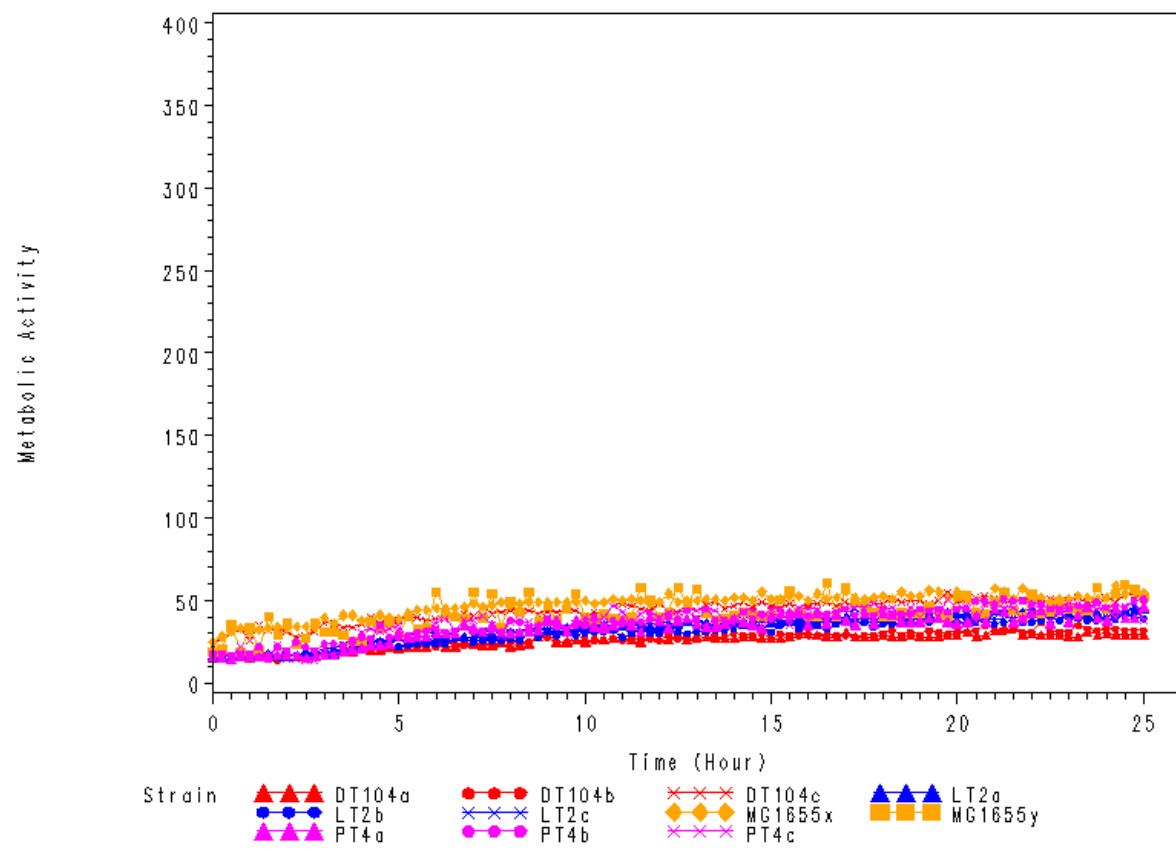

PM02A, C02 (L-Glucose)

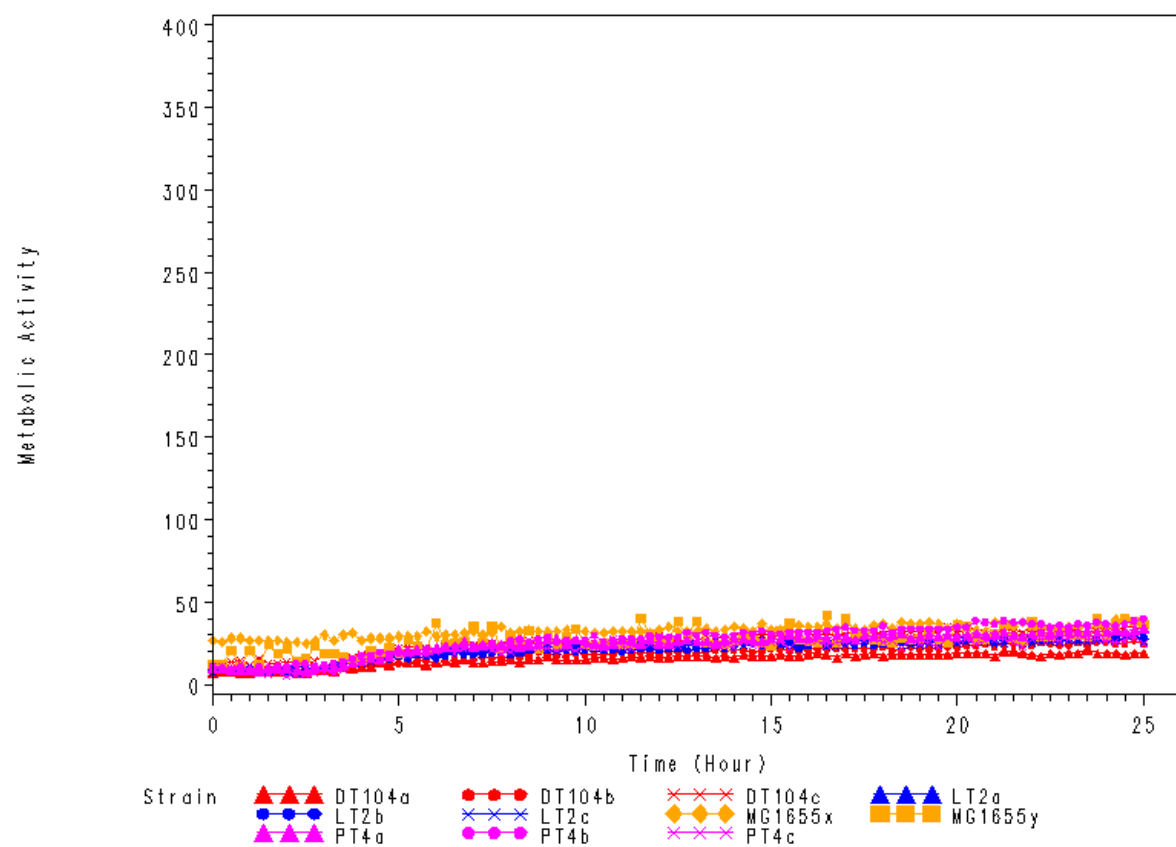

PM02A, C03 (D-Lactitol)

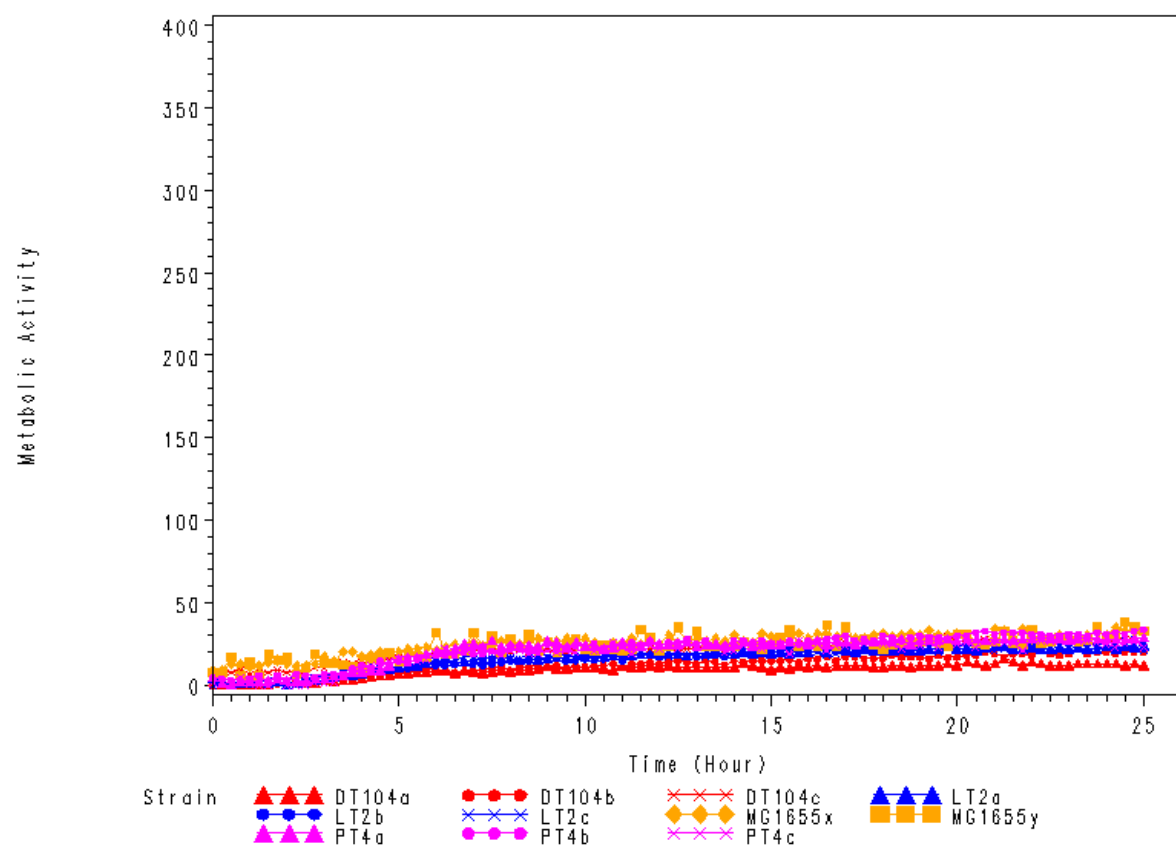

Kinetic Data of Carbon Source Utilisation

PM02A, C04 (D-Lyxose)

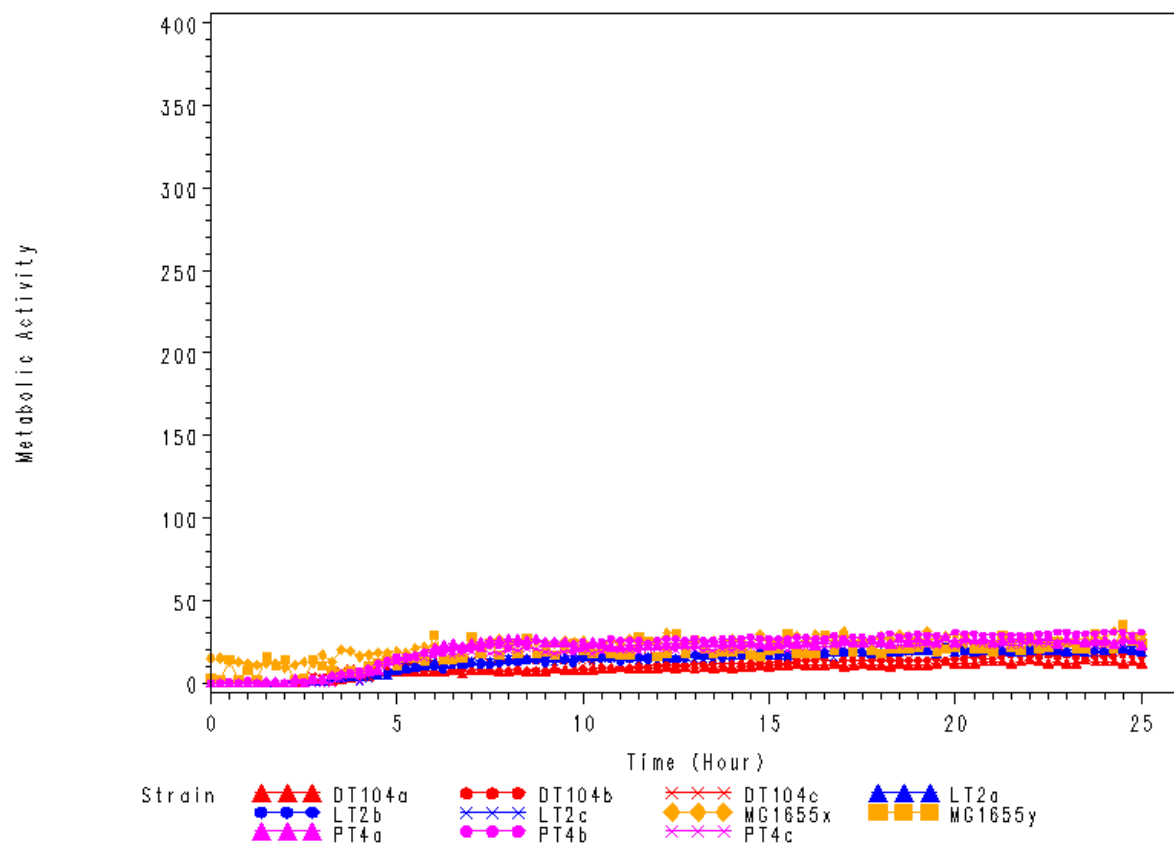

PM02A, C05 (Maltitol)

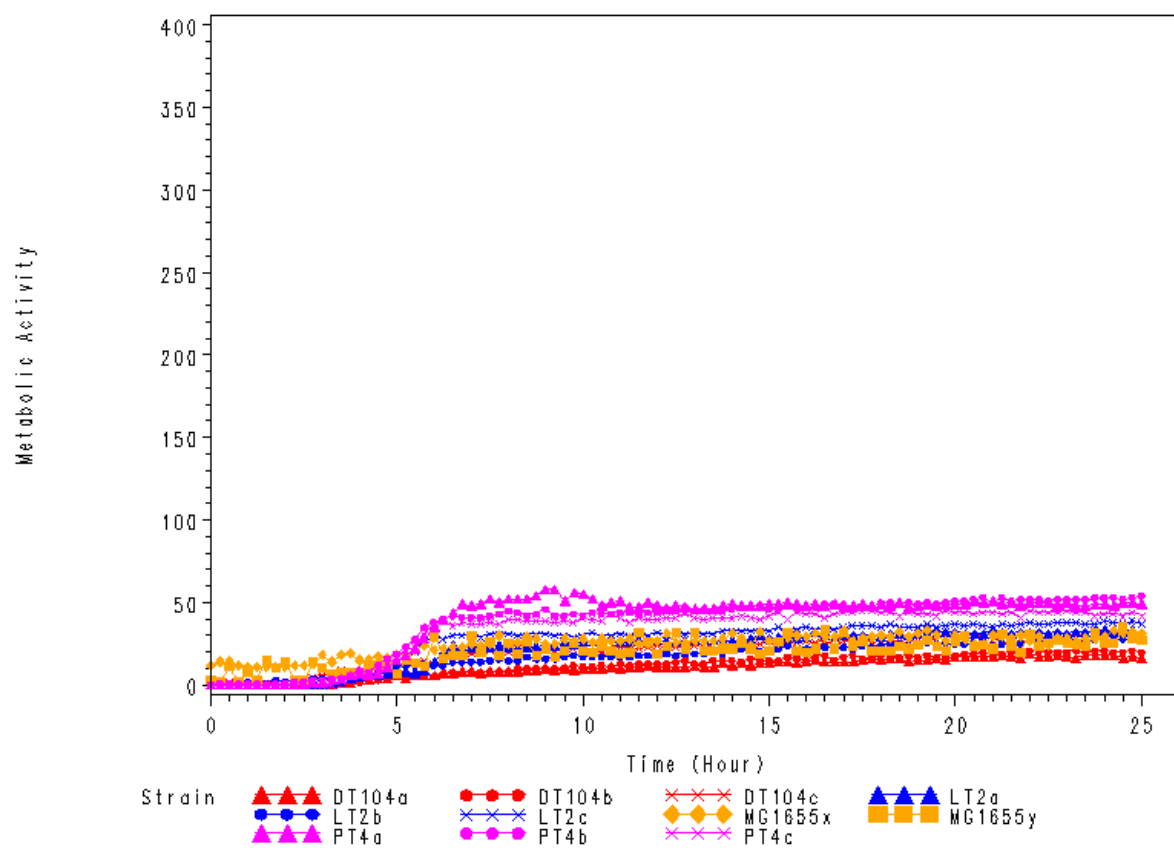

PM02A, C06 (α-Methyl-D-Galactoside)

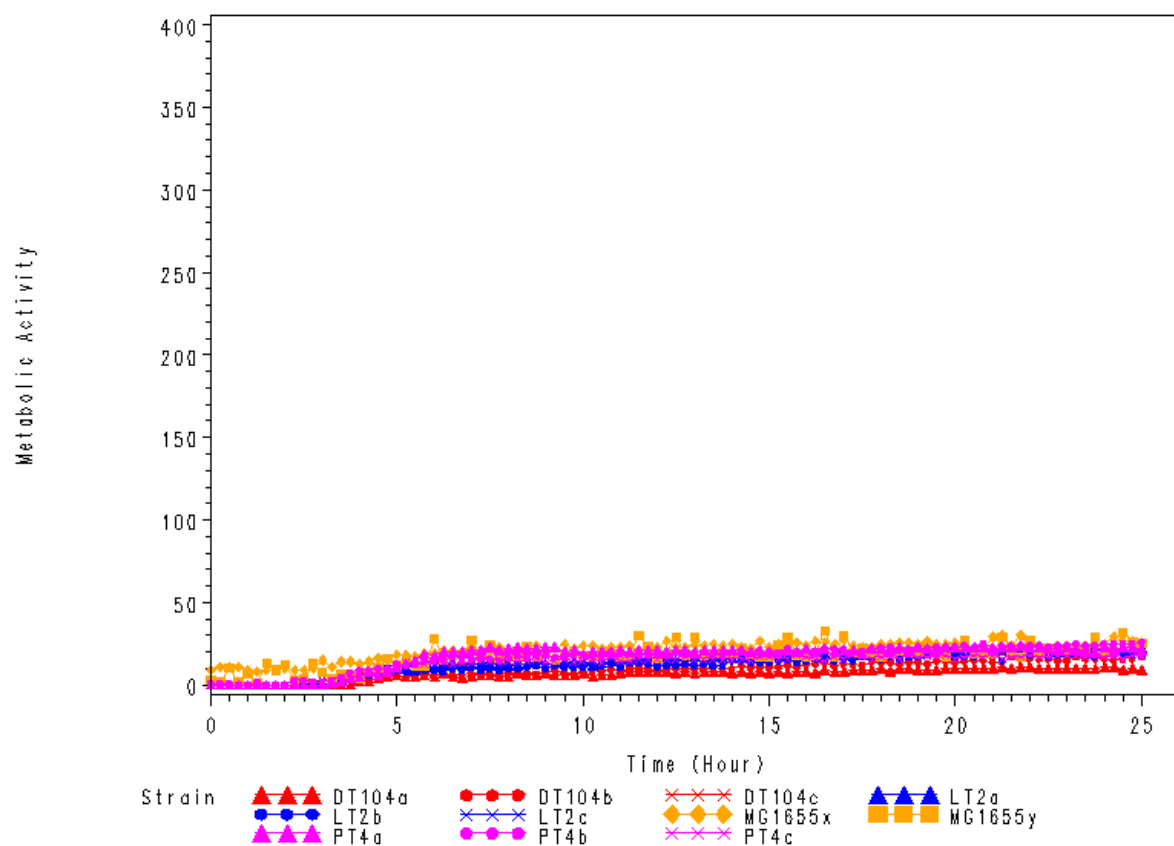

Kinetic Data of Carbon Source Utilisation

PM02A, C07 (b-Methyl-D-Galactoside)

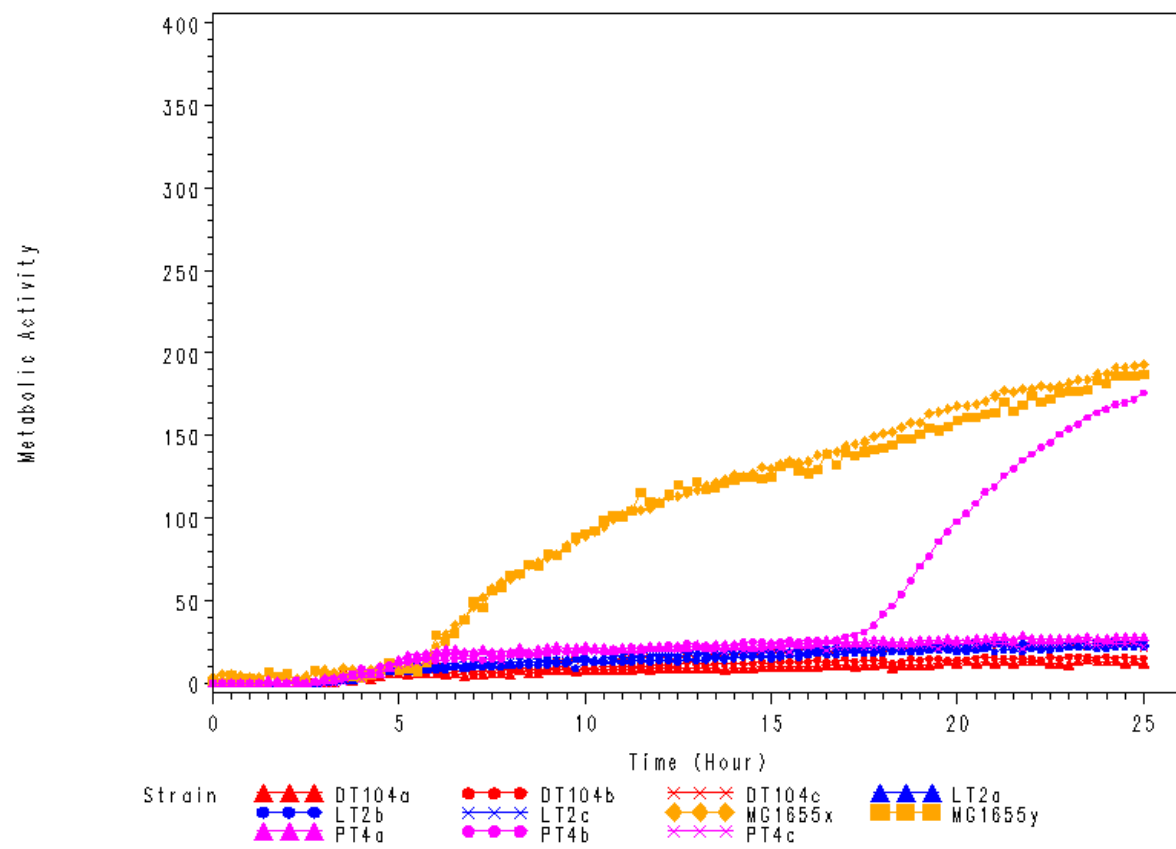

PM02A, C08 (3-Methyl Glucose)

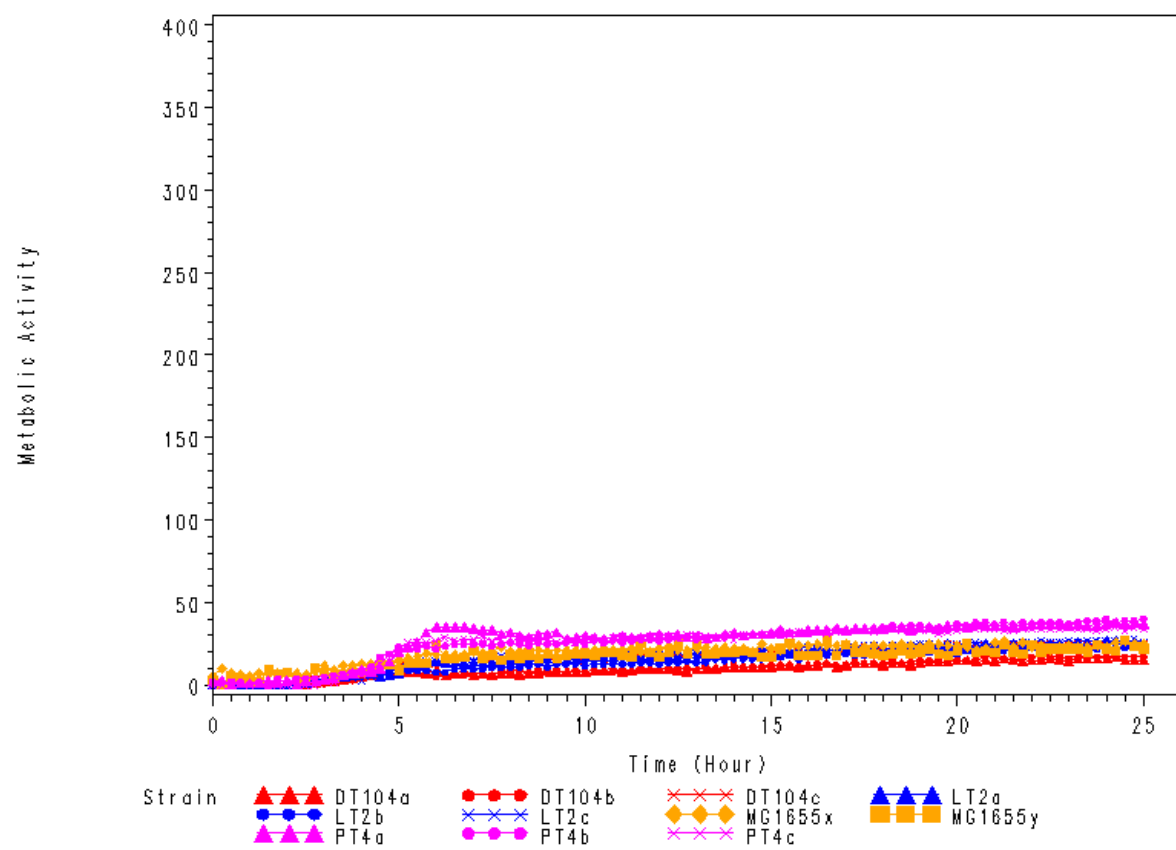

PM02A, C09 (b-Methyl-D-Glucuronic Acid)

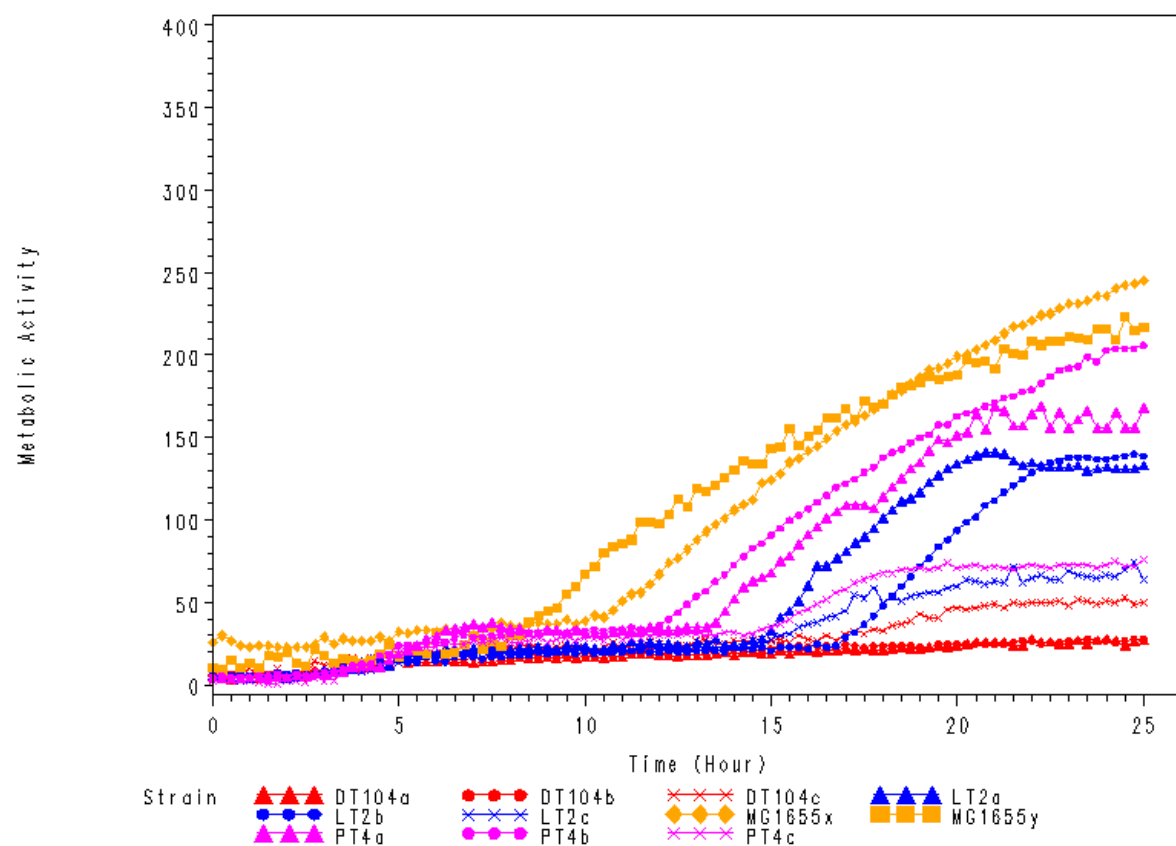

Kinetic Data of Carbon Source Utilisation

PM02A, C10 (α-Methyl-D-Mannoside)

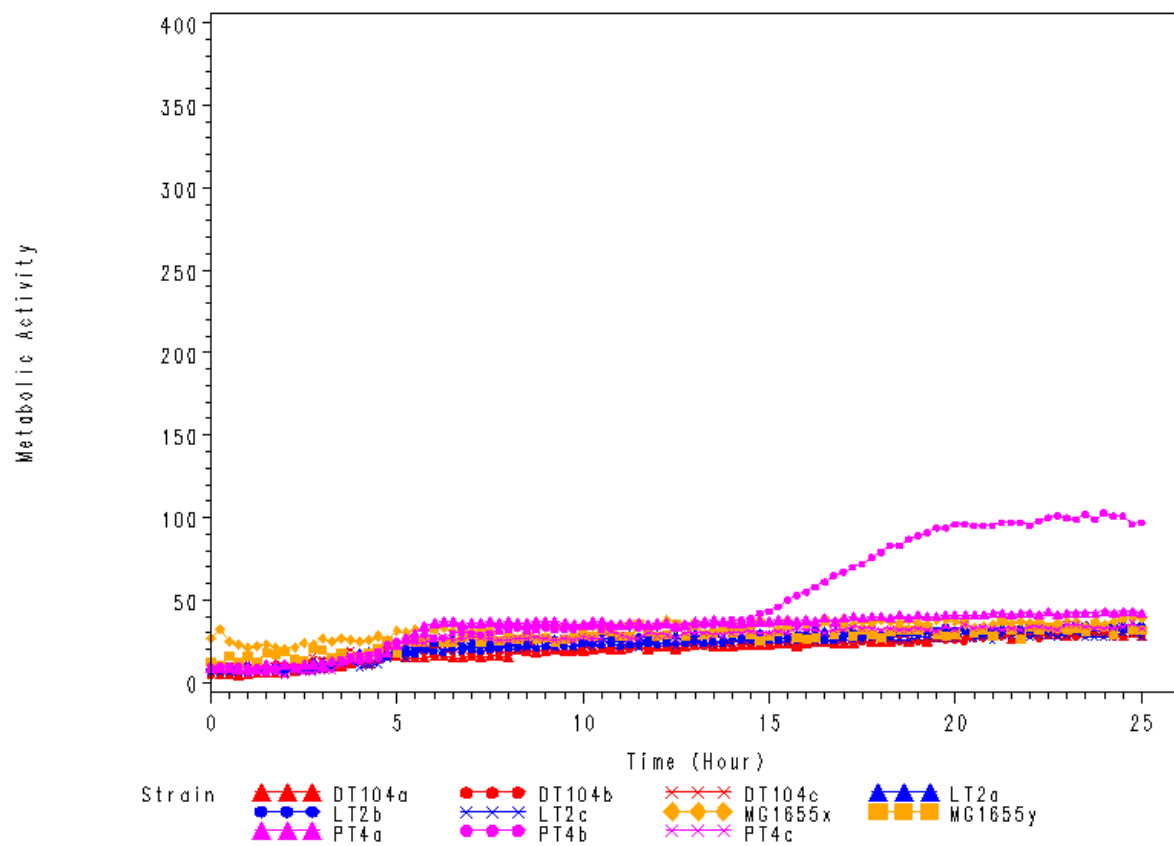

PM02A, C11 (β-Methyl-D-Xyloside)

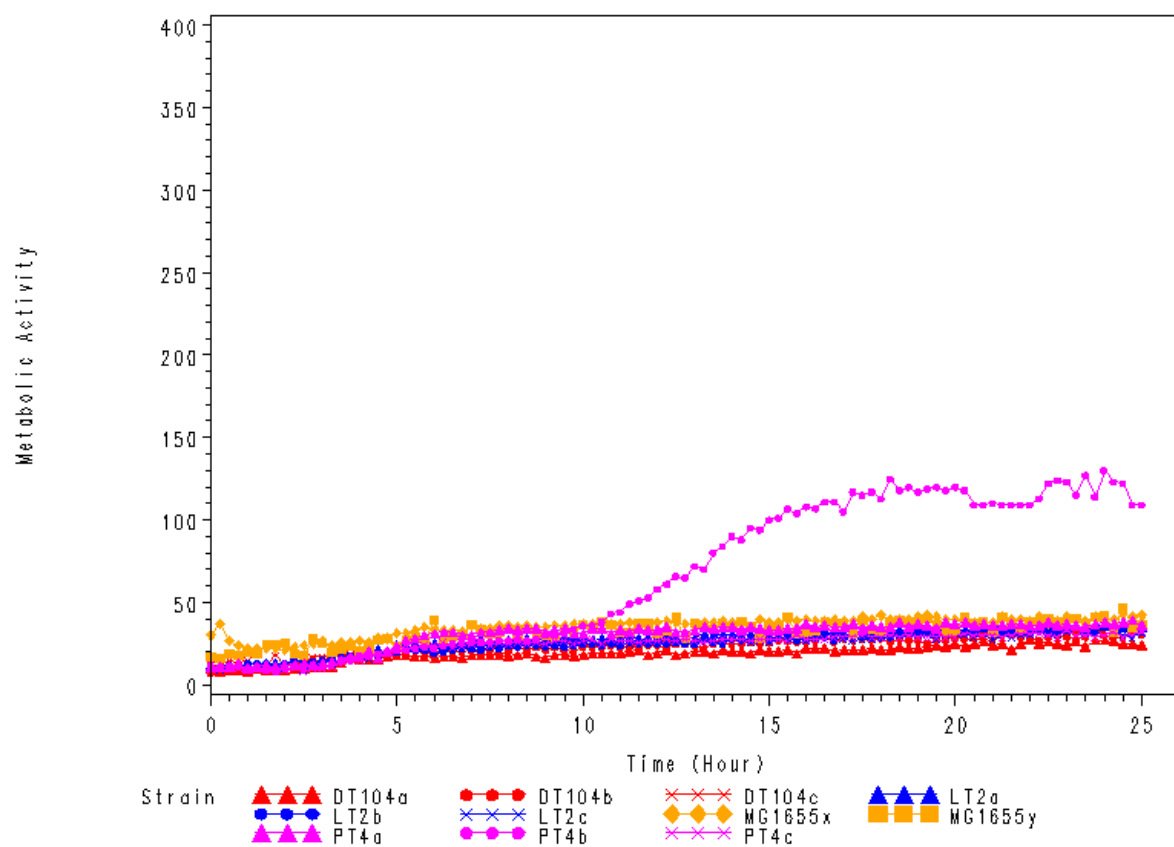

PM02A, C12 (Palatinose)

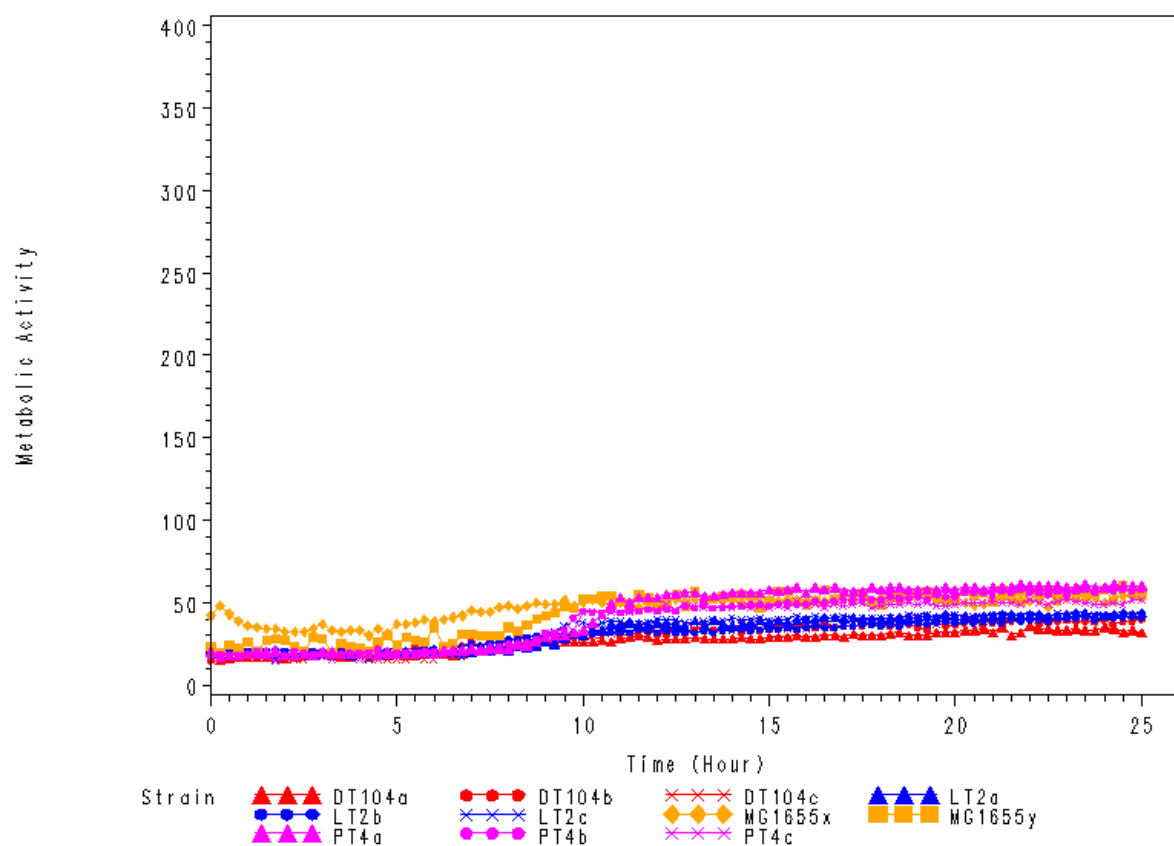

Kinetic Data of Carbon Source Utilisation

PM02A, D01 (D-Raffinose)

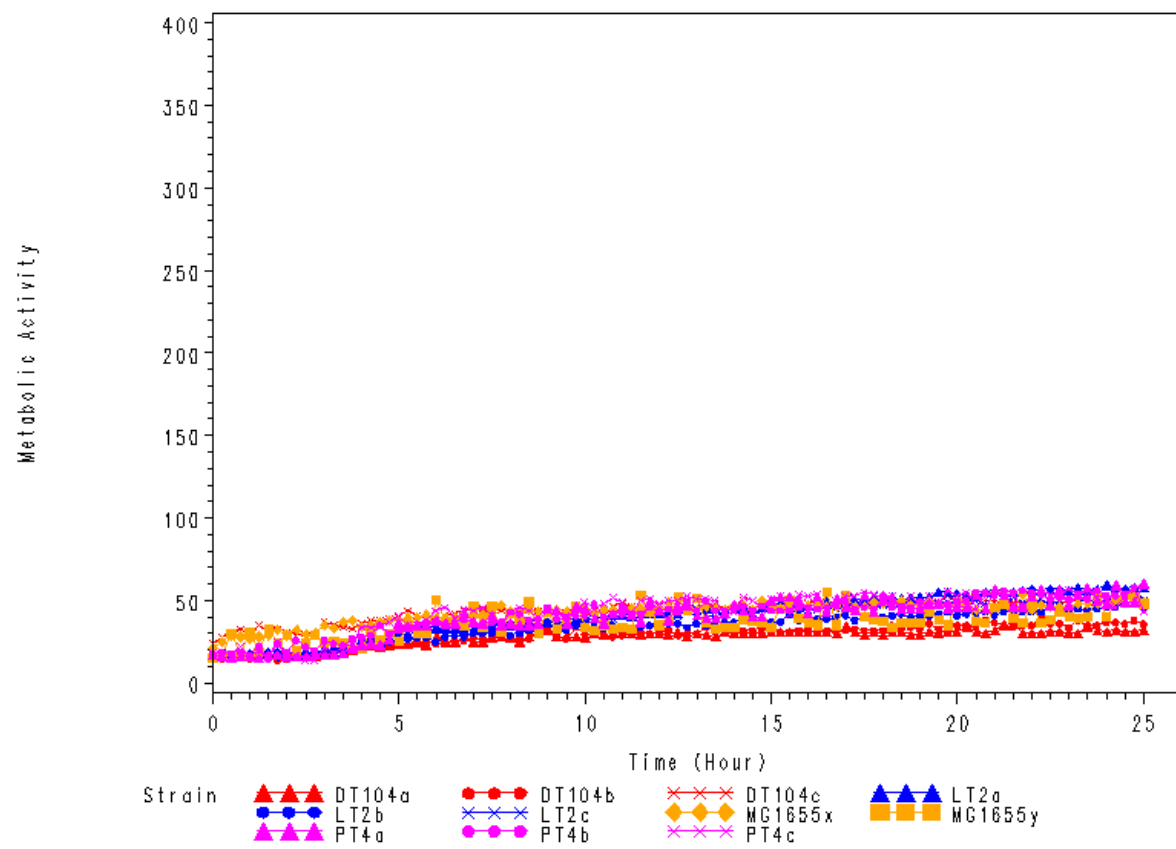

PM02A, D02 (Salicin)

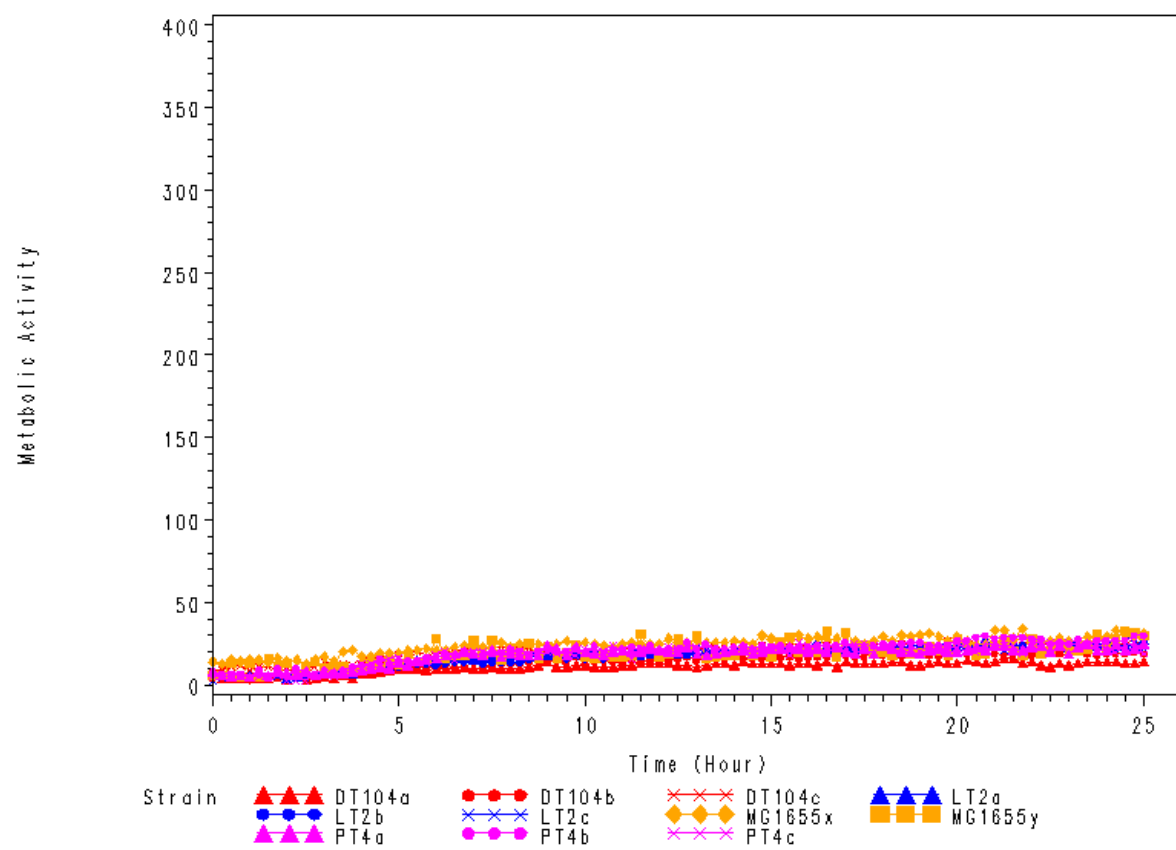

PM02A, D03 (Sedoheptulosan)

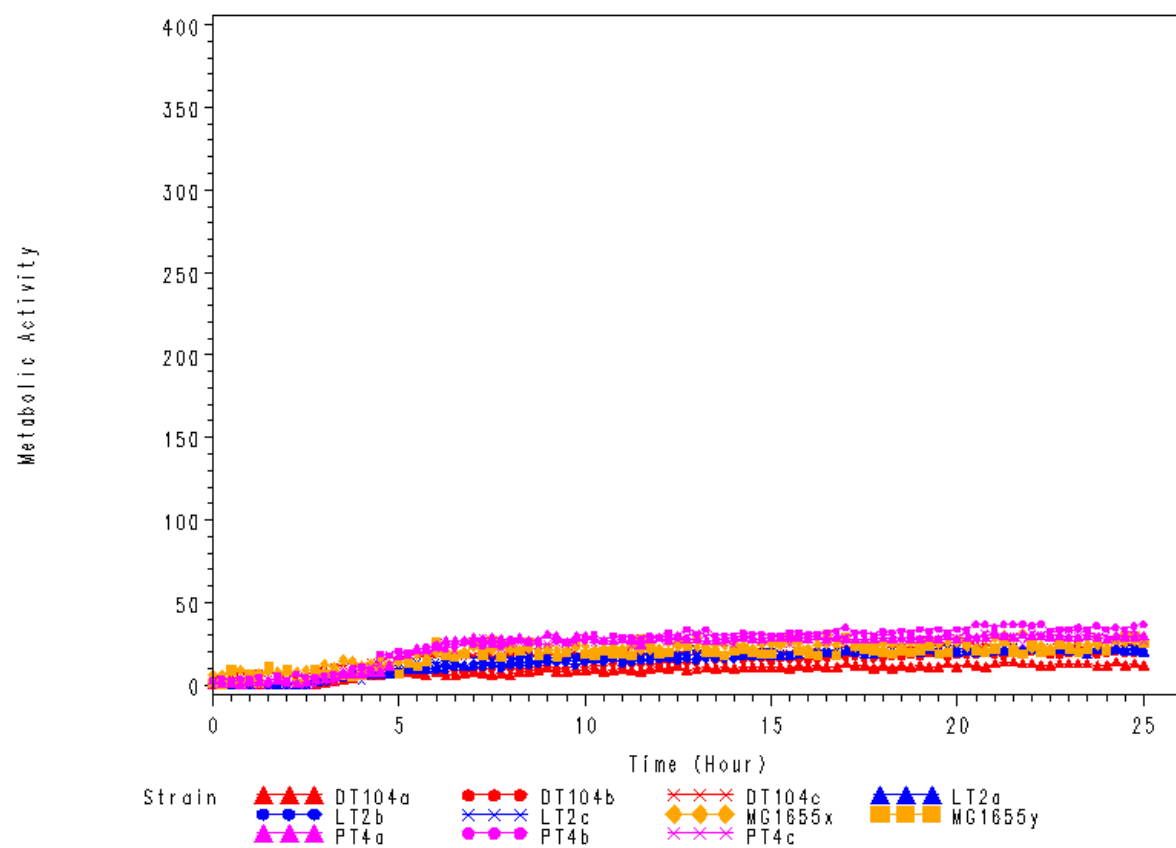

Kinetic Data of Carbon Source Utilisation

PM02A, D04 (L-Sorbose)

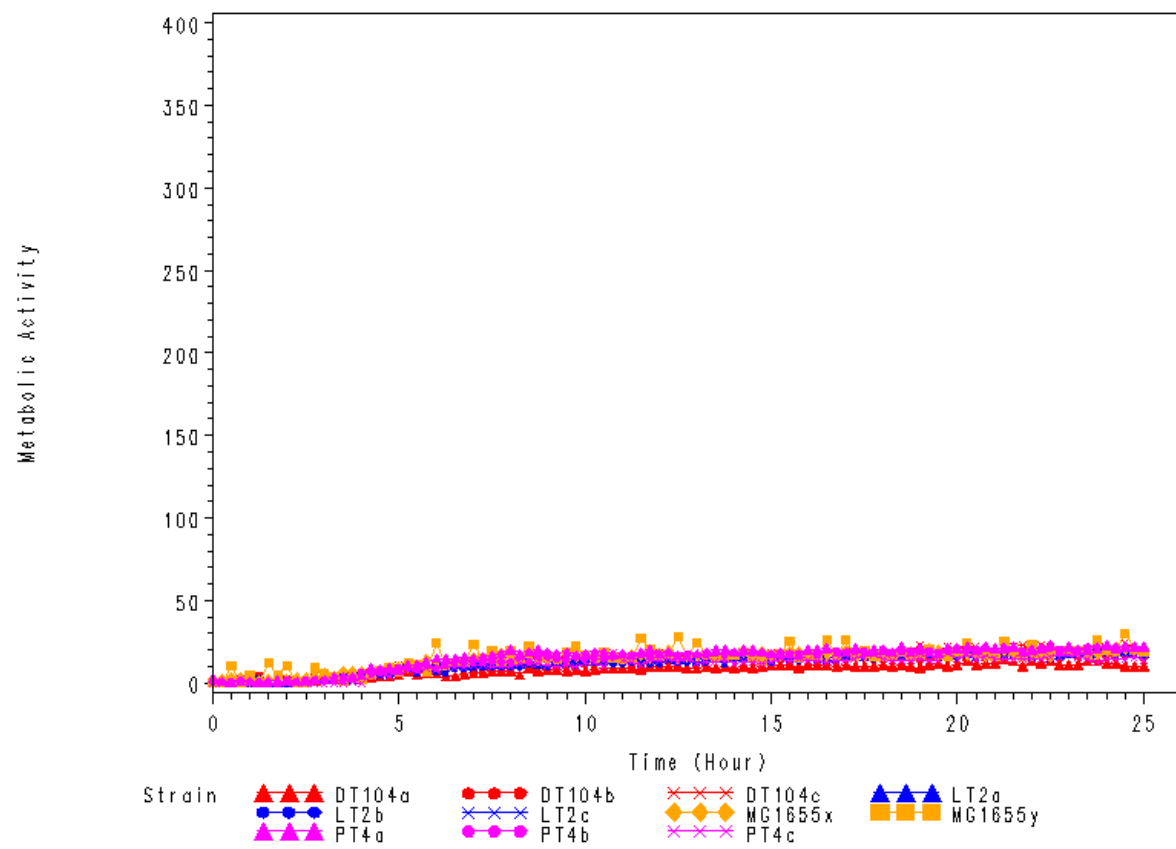

PM02A, D05 (Stachyose)

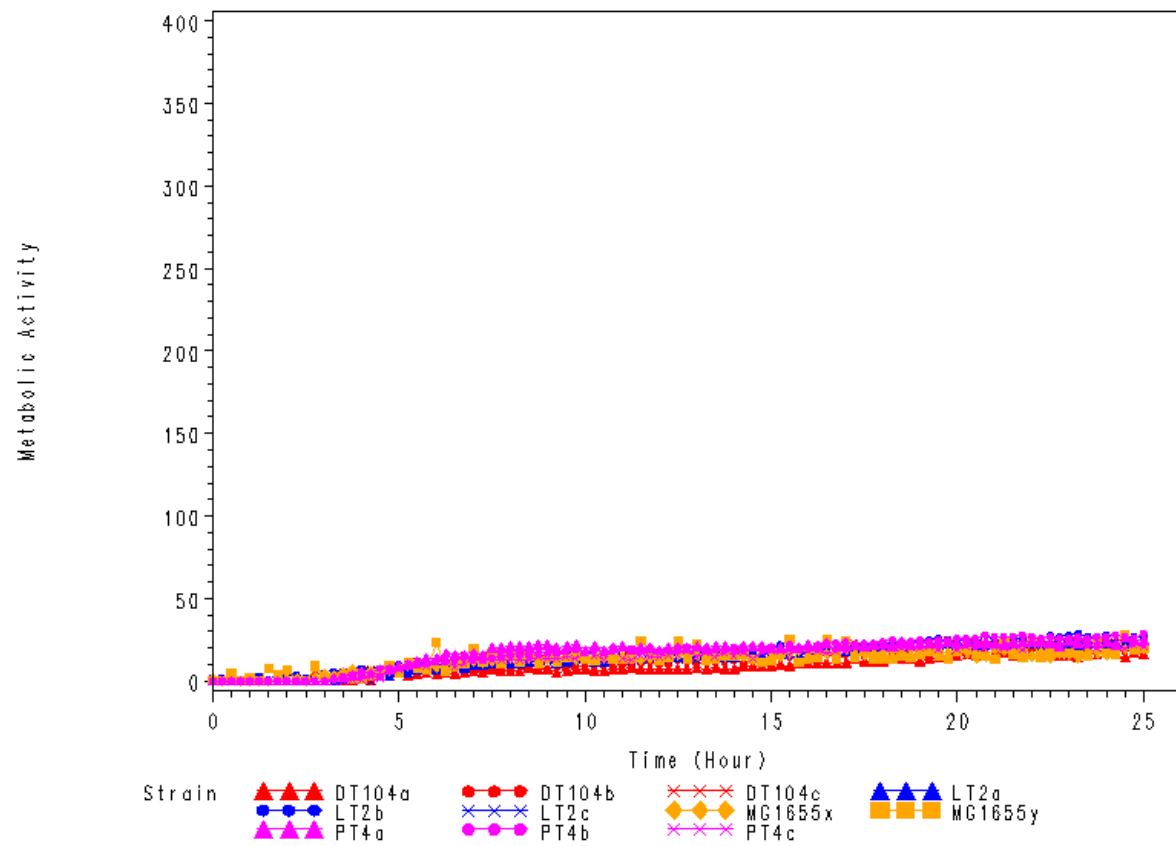

PM02A, D06 (D-Tagatose)

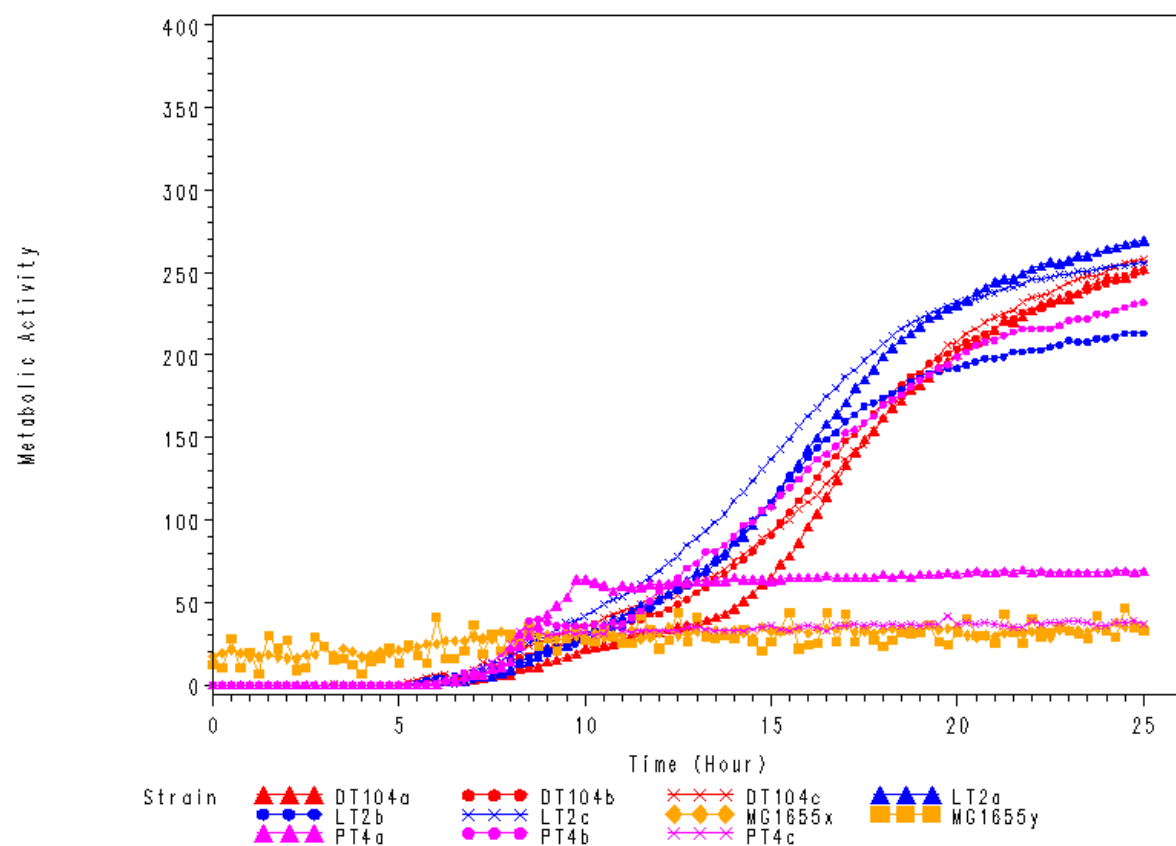

Kinetic Data of Carbon Source Utilisation

PM02A, D07 (Turranose)

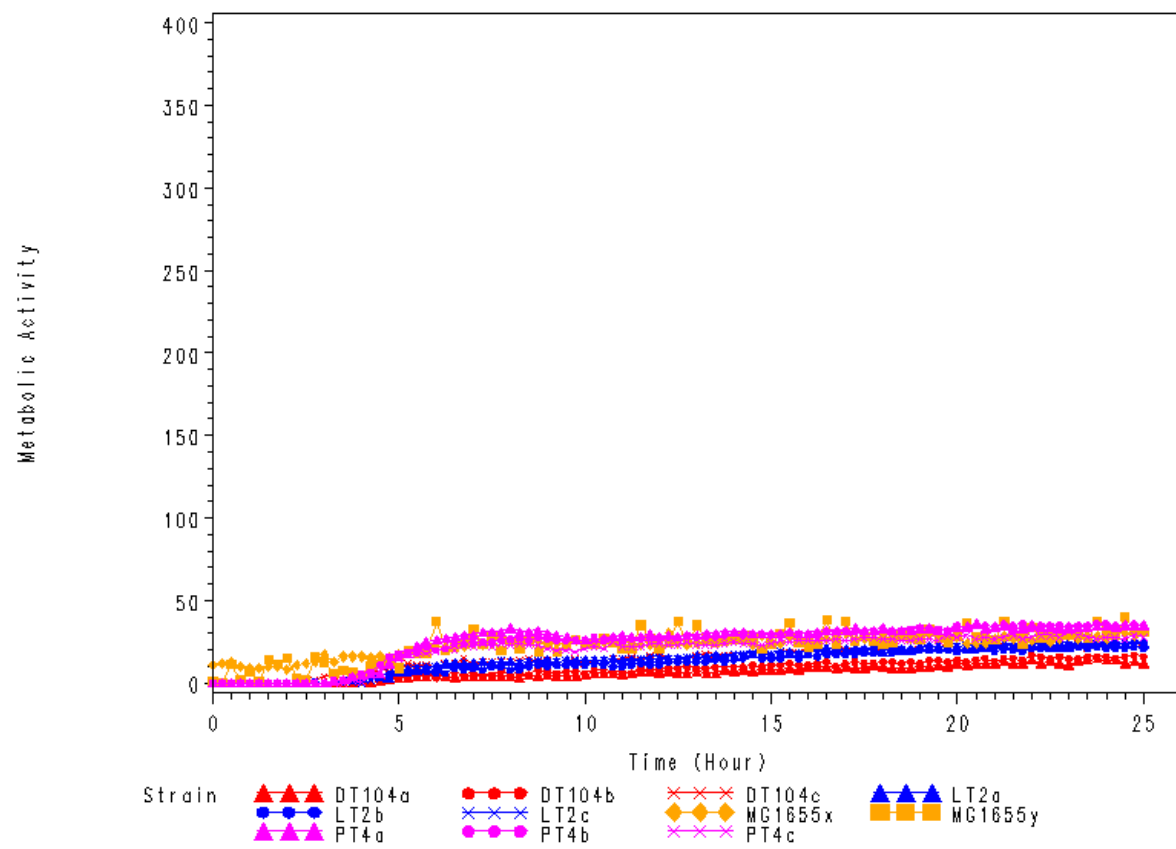

PM02A, D08 (Xylitol)

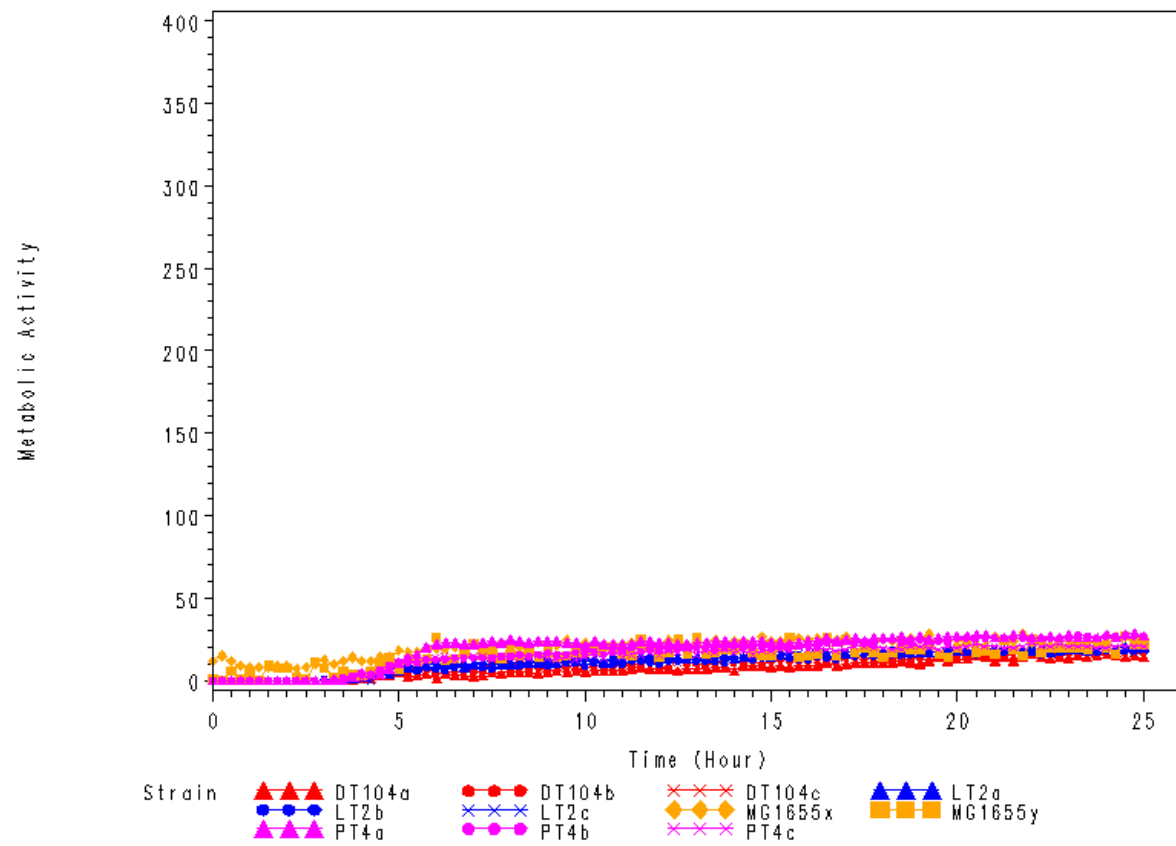

PM02A, D09 (L-Xylose)

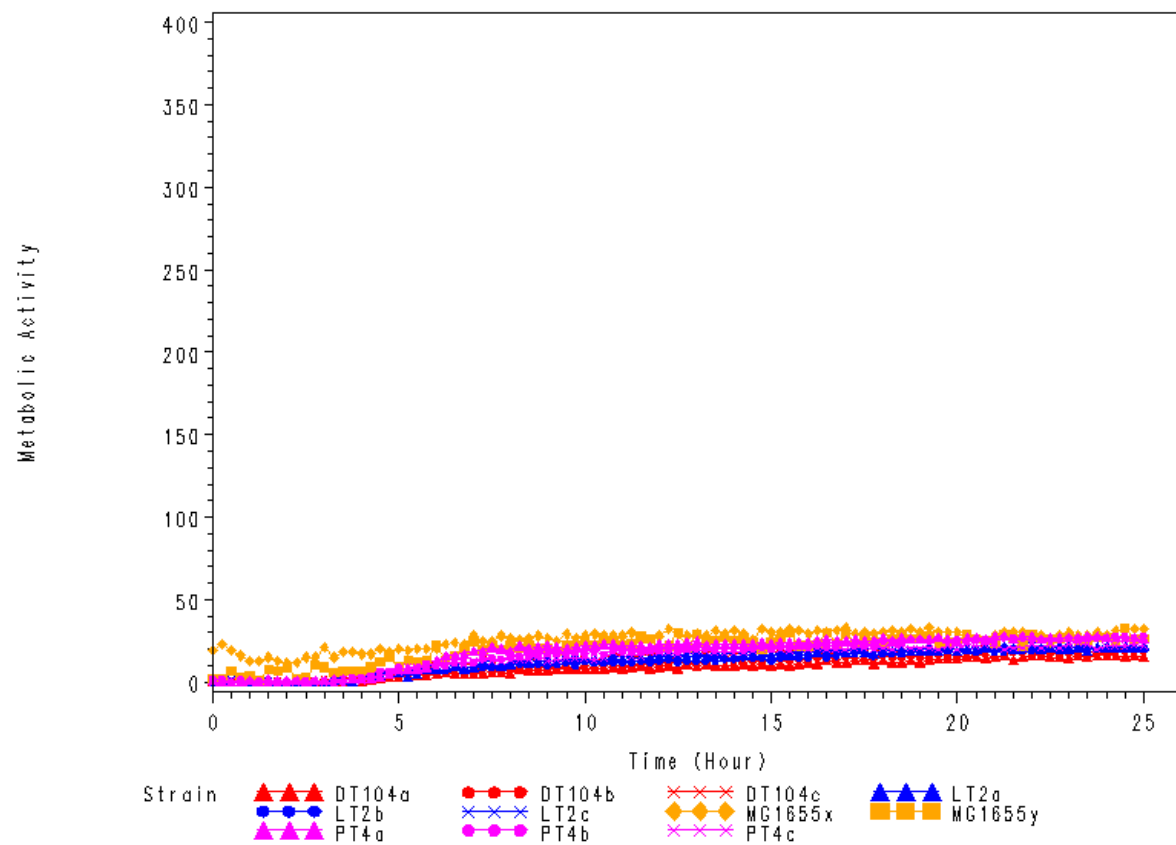

Kinetic Data of Carbon Source Utilisation

PM02A, D10 (g-Amino-Butyric Acid)

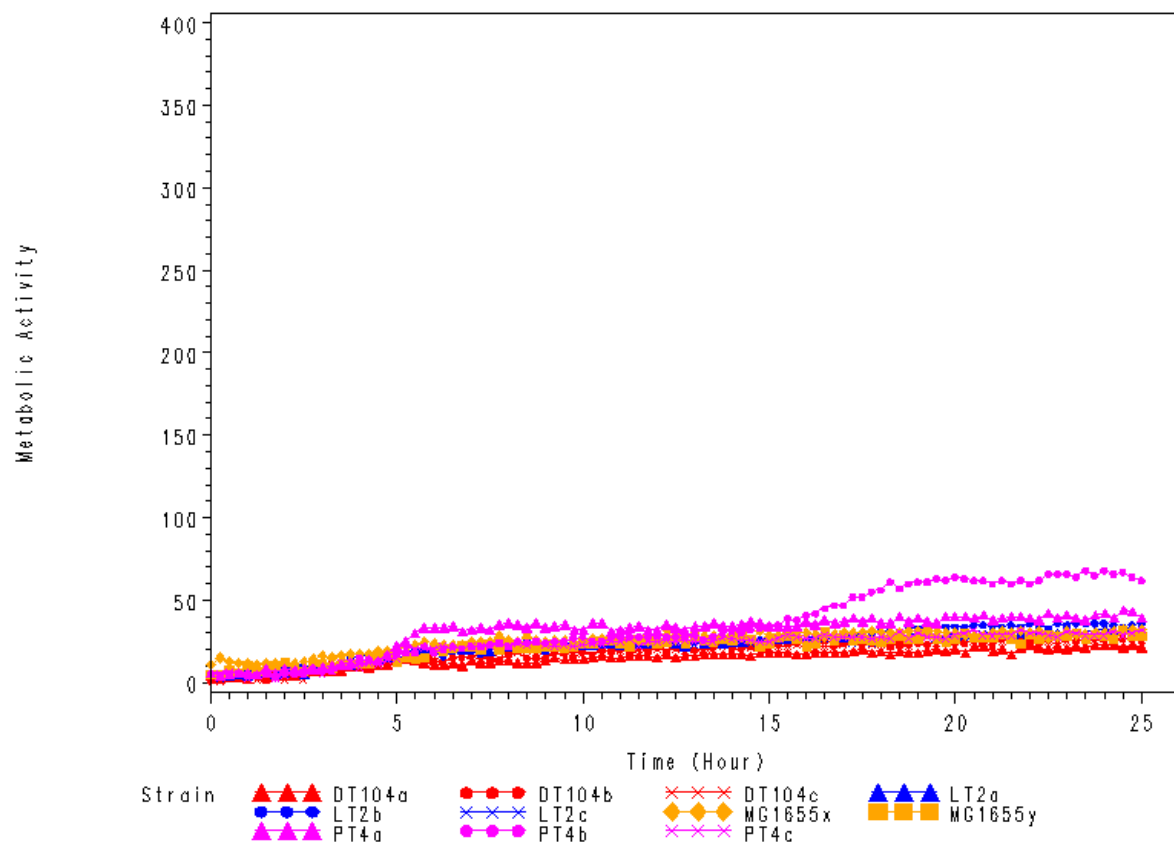

PM02A, D11 (d-Amino-Valeric Acid)

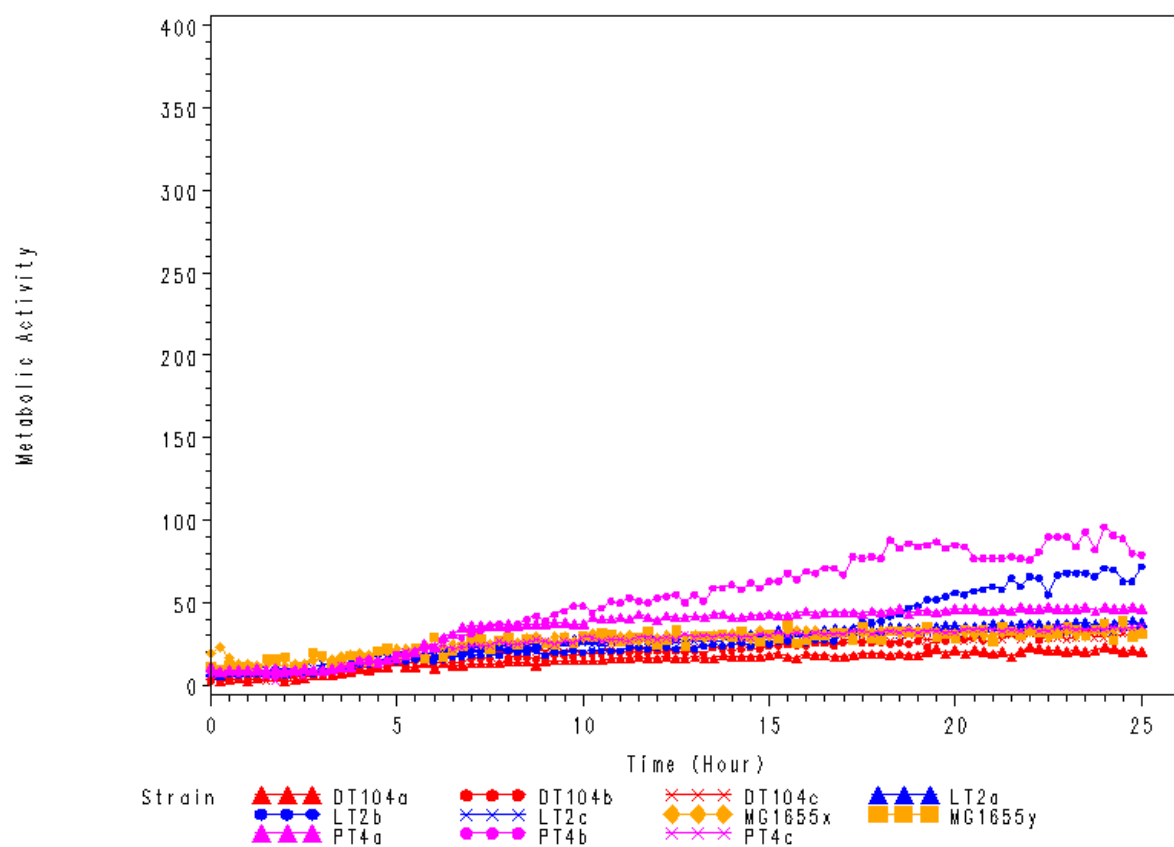

PM02A, D12 (Butyric Acid)

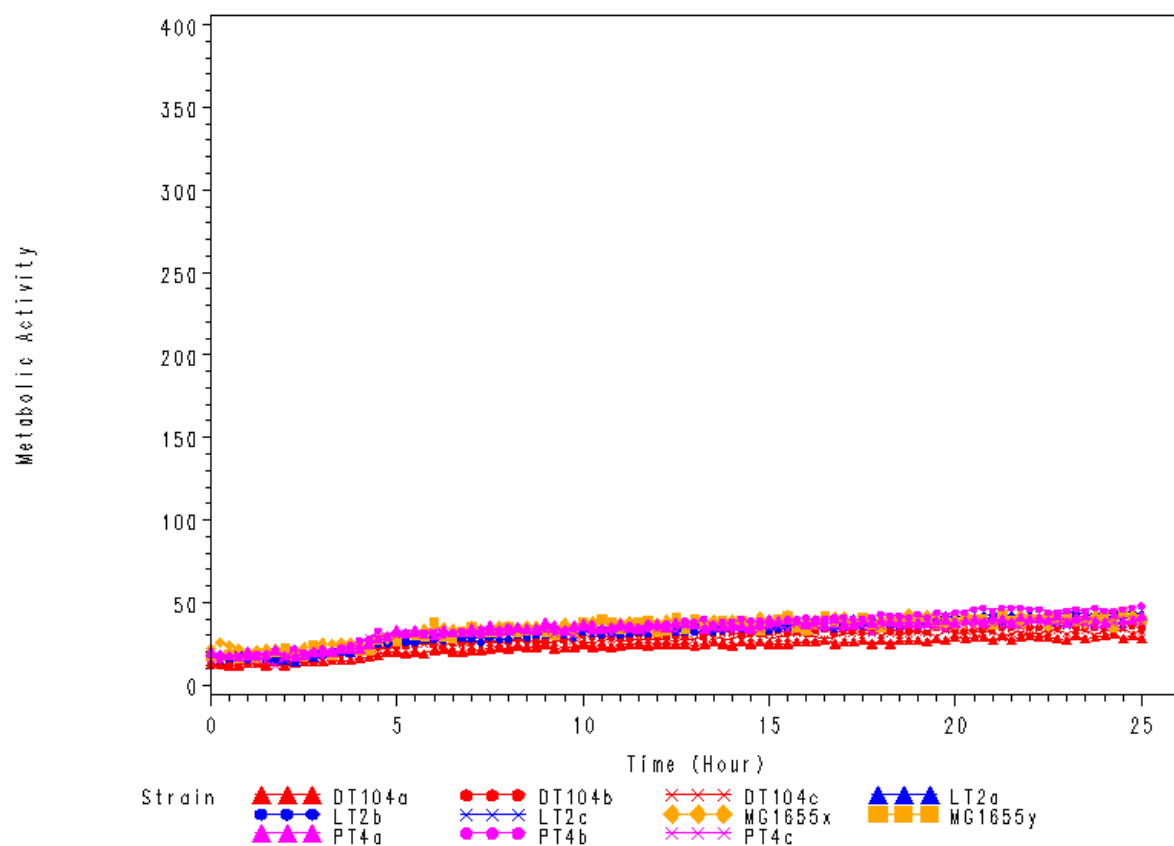



Kinetic Data of Carbon Source Utilisation

PM02A, E01 (Capric Acid)

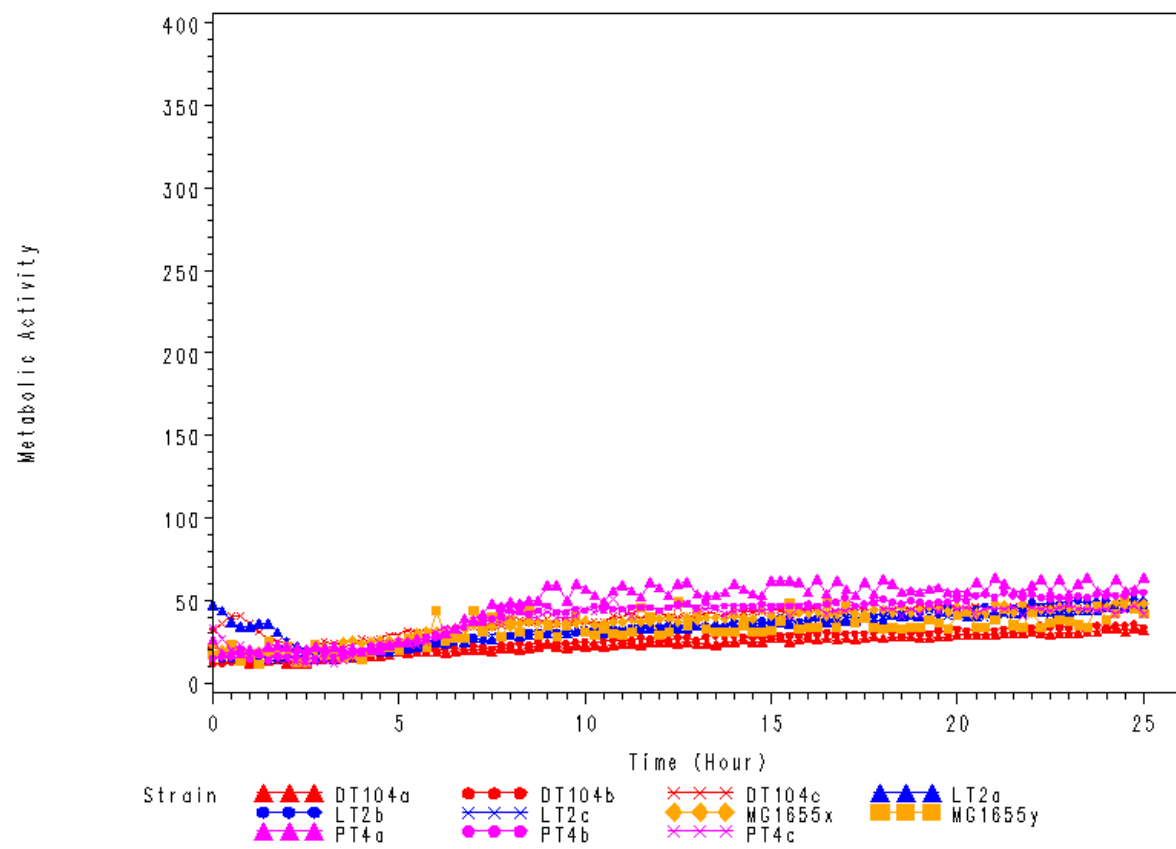

PM02A, E02 (Caproic Acid)

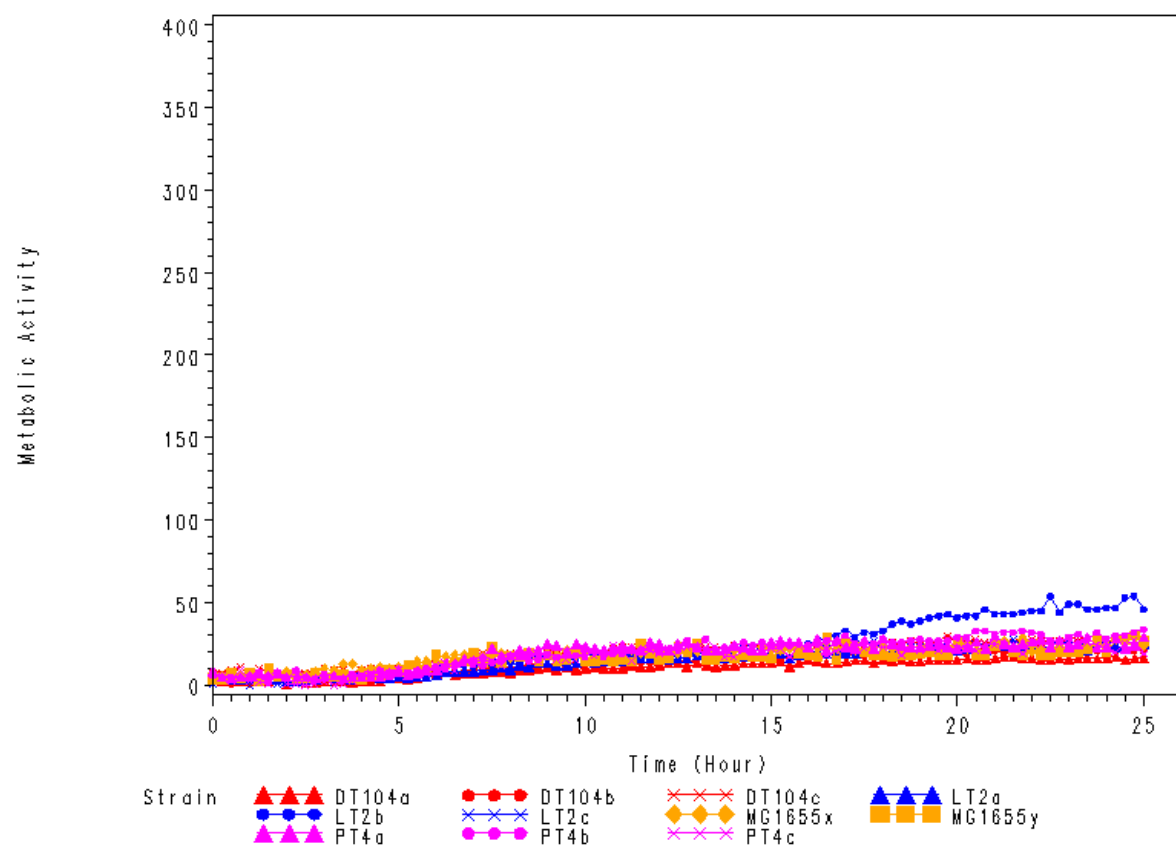

PM02A, E03 (Citraconic Acid)

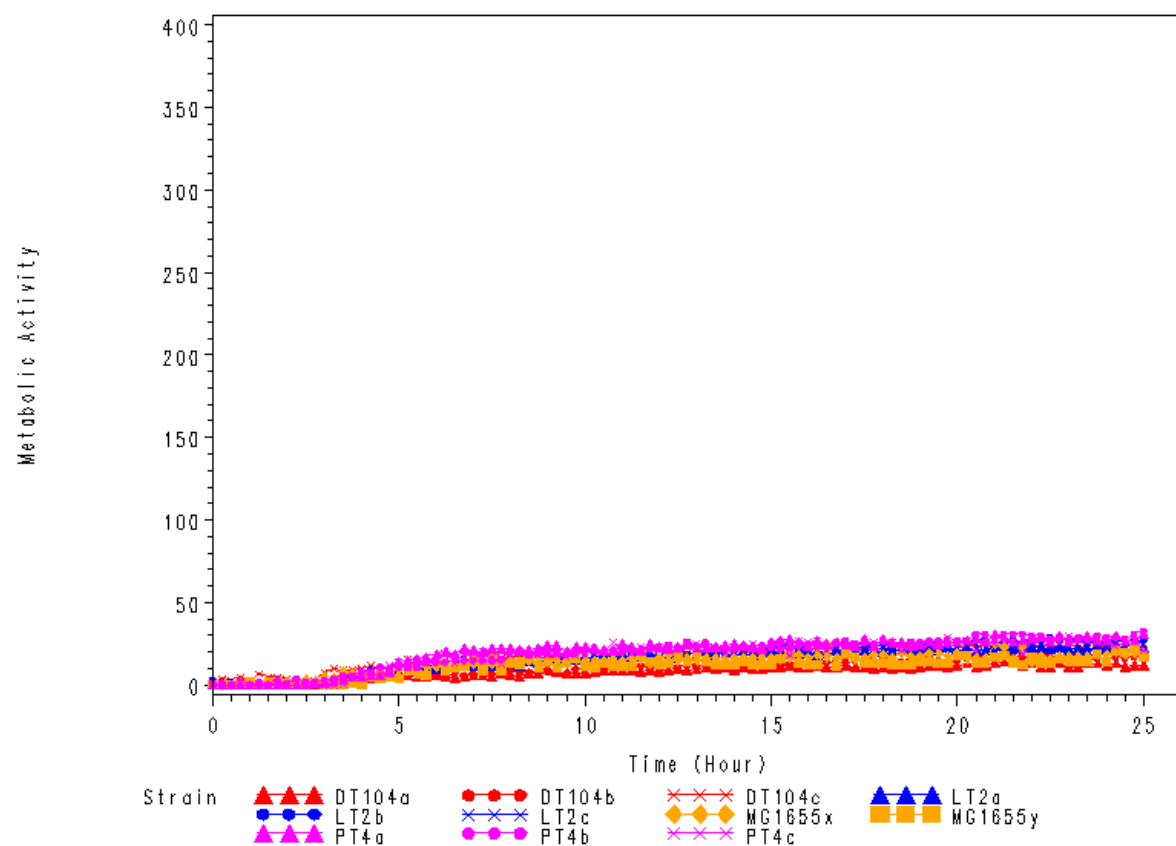

Kinetic Data of Carbon Source Utilisation

PM02A, E04 (D,L-Citramalic Acid)

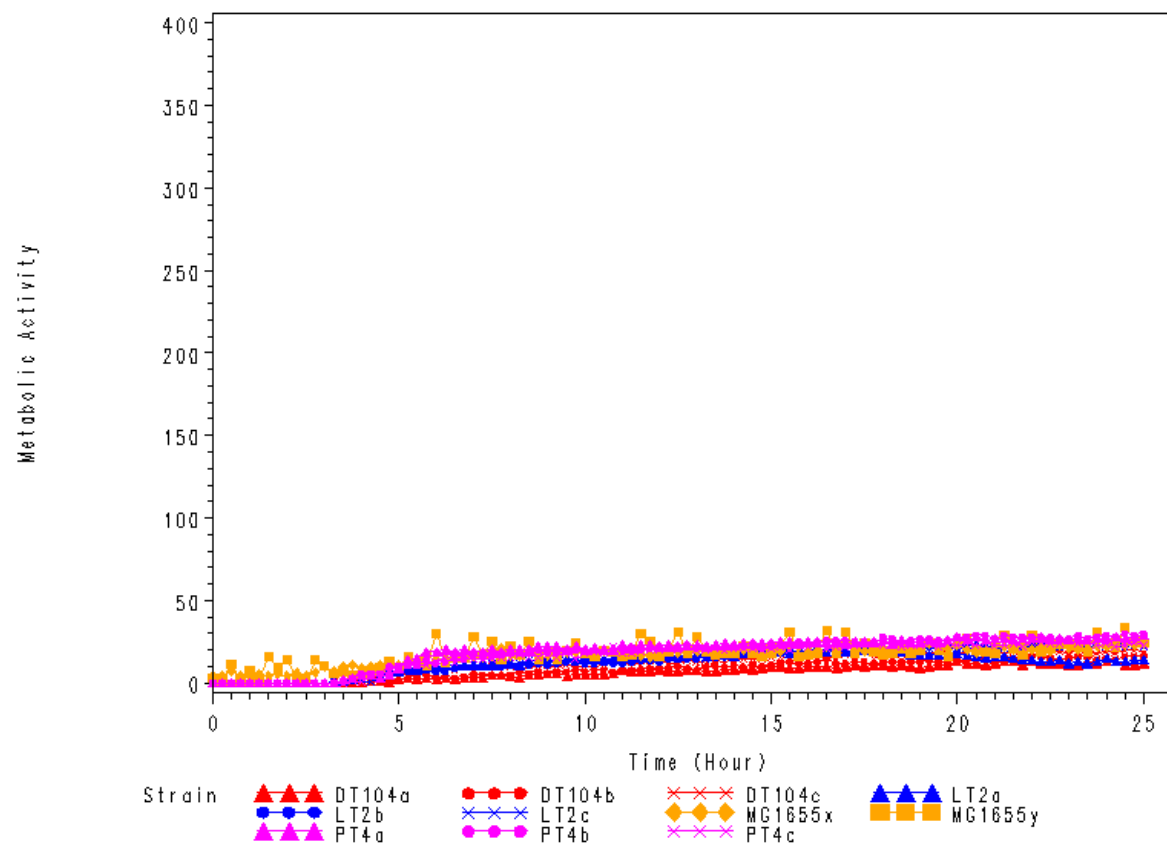

PM02A, E05 (Dihydroxy-Fumaric Acid)

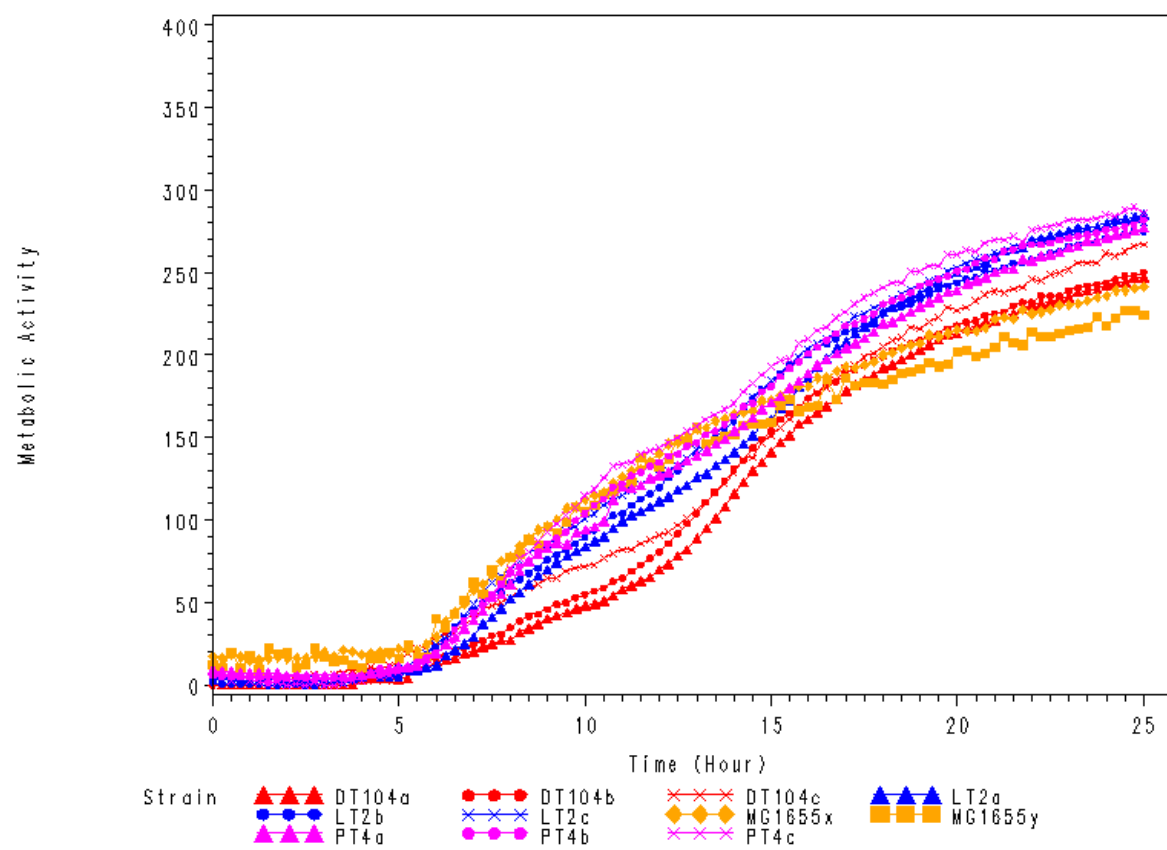

PM02A, E06 (2-Hydroxy-Benzoic Acid)

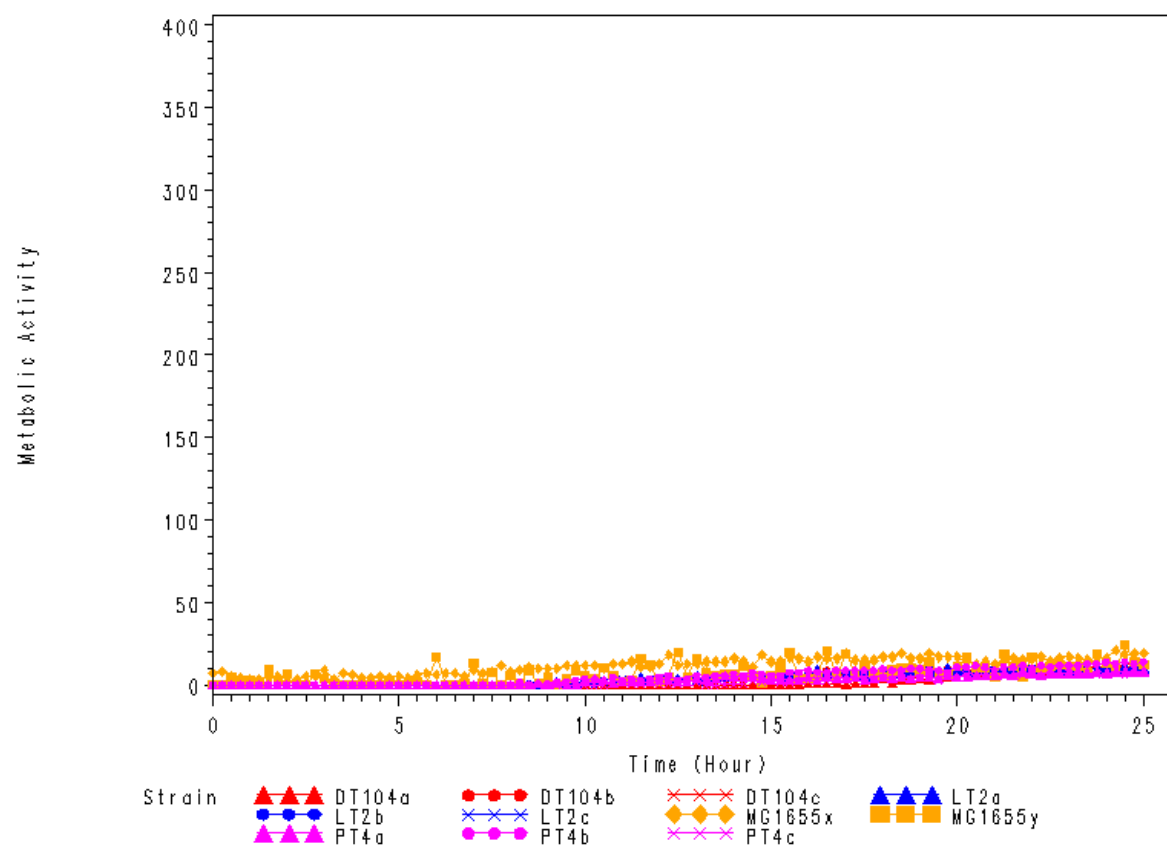

Kinetic Data of Carbon Source Utilisation

PM02A, E07 (4-Hydroxy-Benzoic Acid)

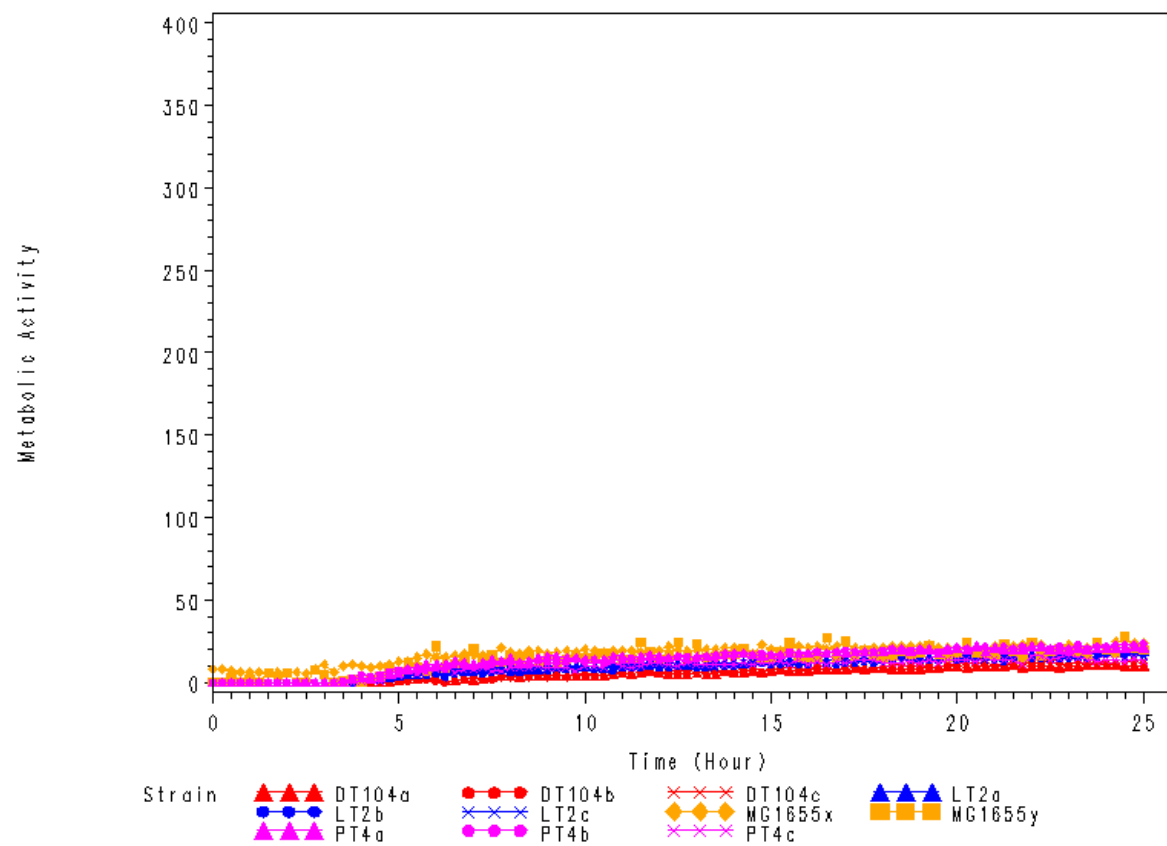

PM02A, E08 (b-Hydroxy-Butyric Acid)

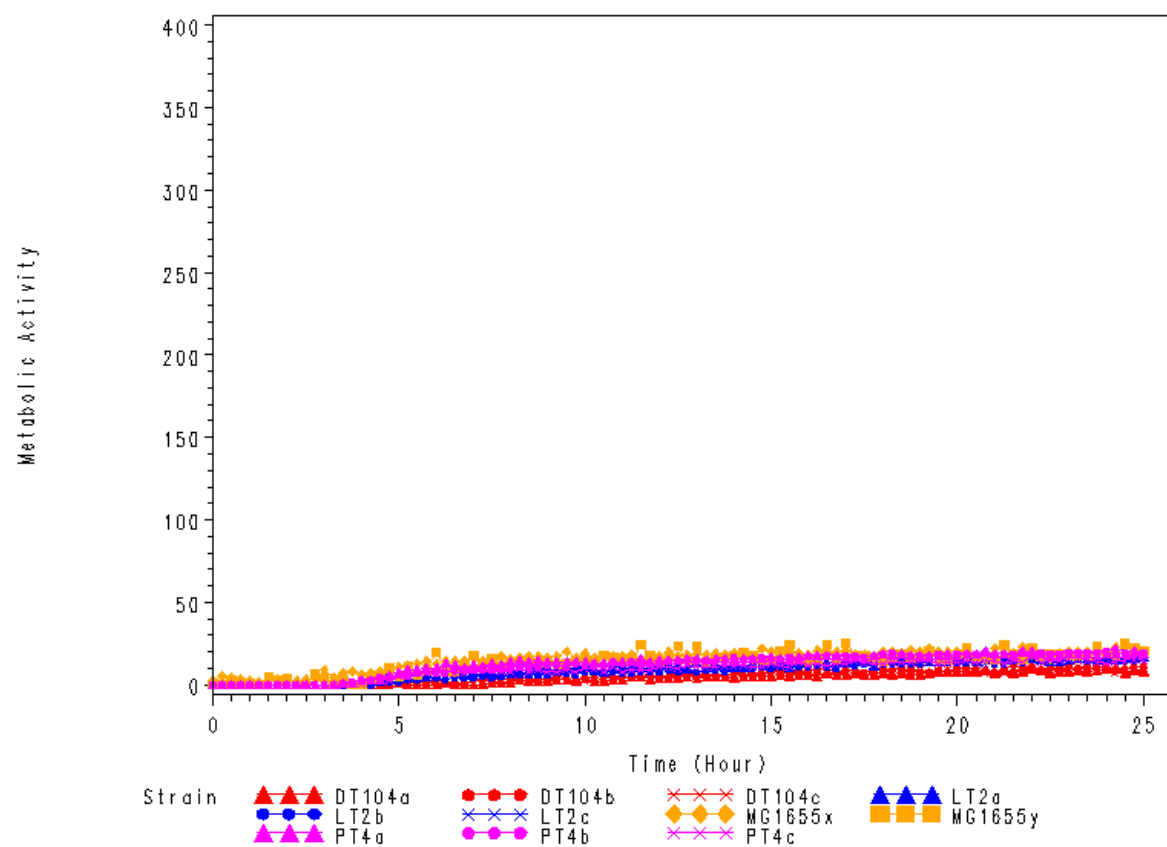

PM02A, E09 (g-Hydroxy-Butyric Acid)

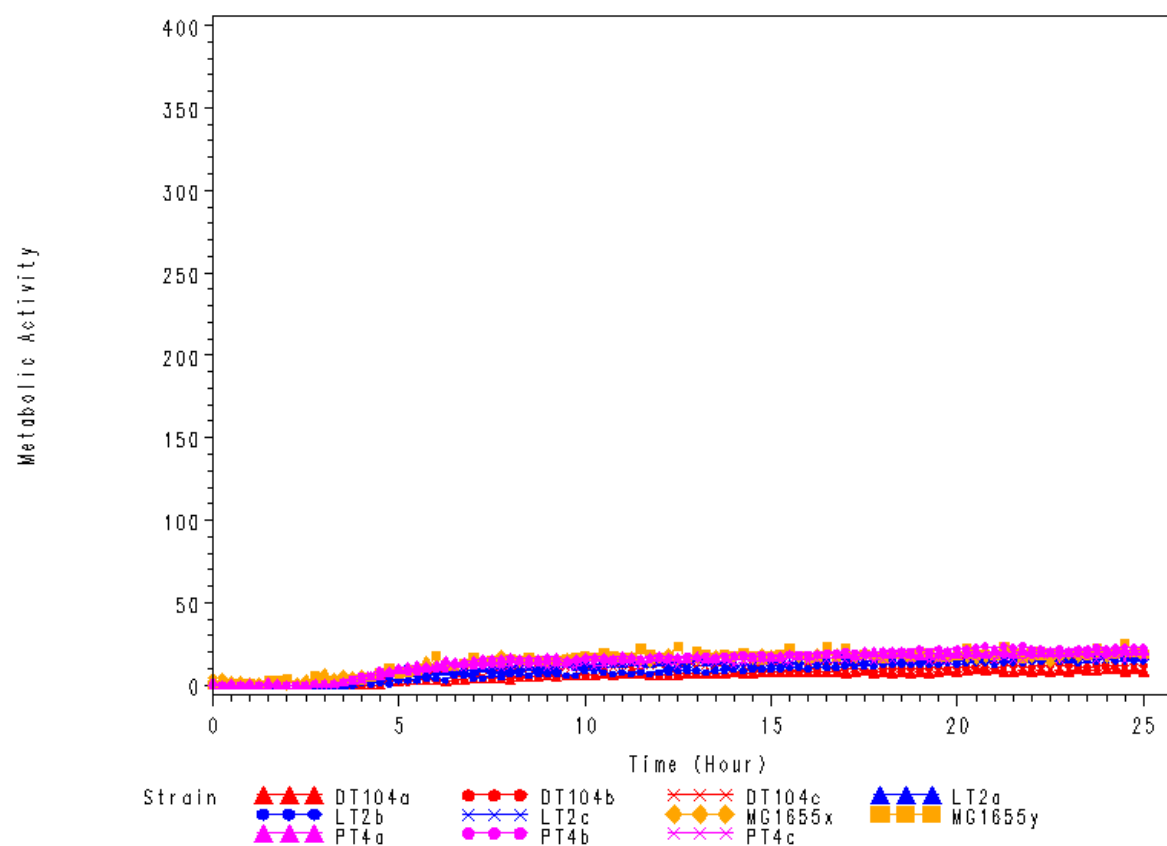

Kinetic Data of Carbon Source Utilisation

PM02A, E10 (b-Hydroxy-Pyruvic Acid)

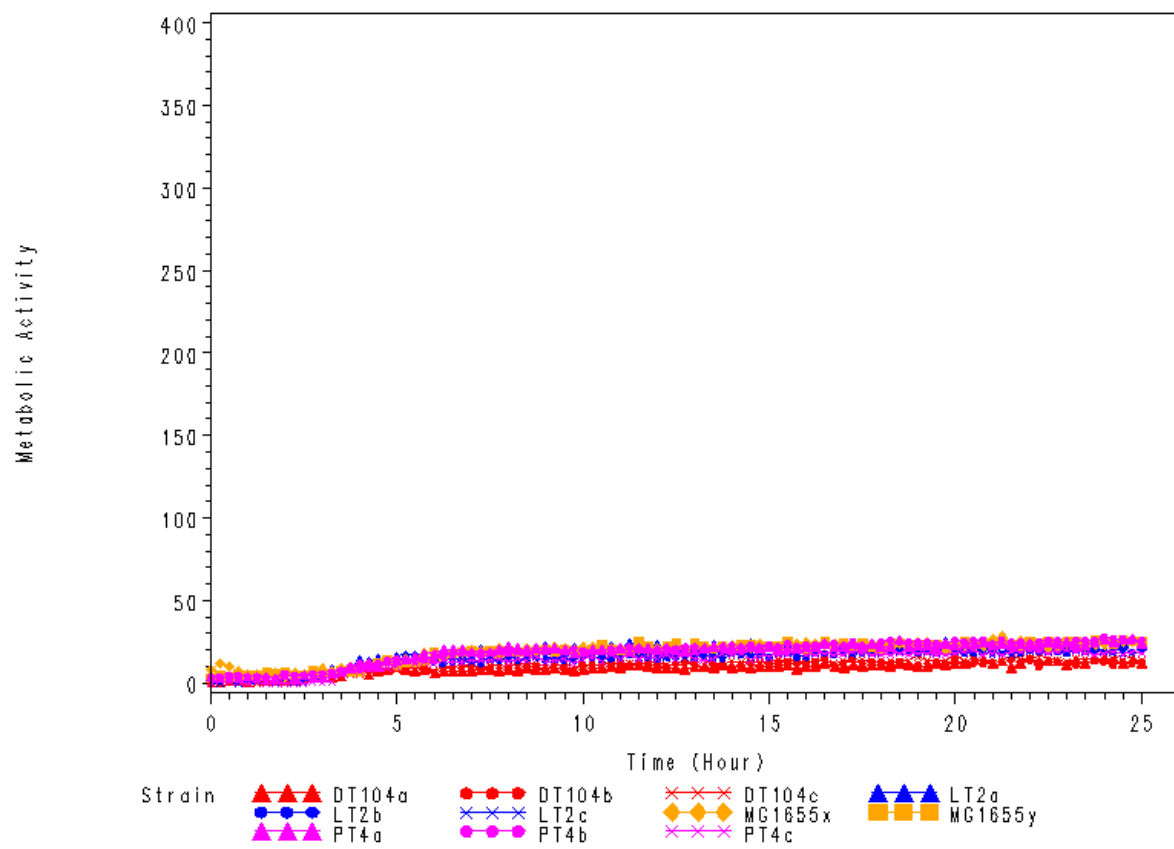

PM02A, E11 (Itaconic Acid)

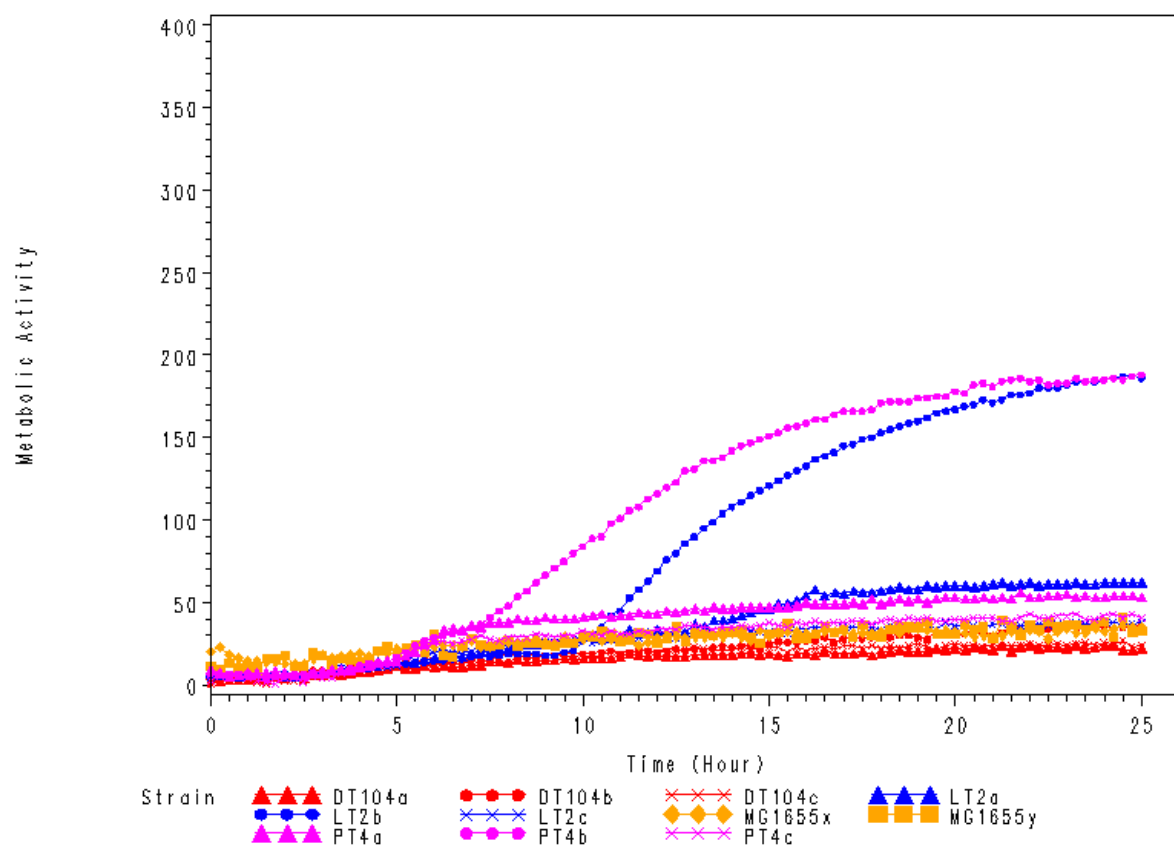

PM02A, E12 (5-Keto-D-Gluconic Acid)

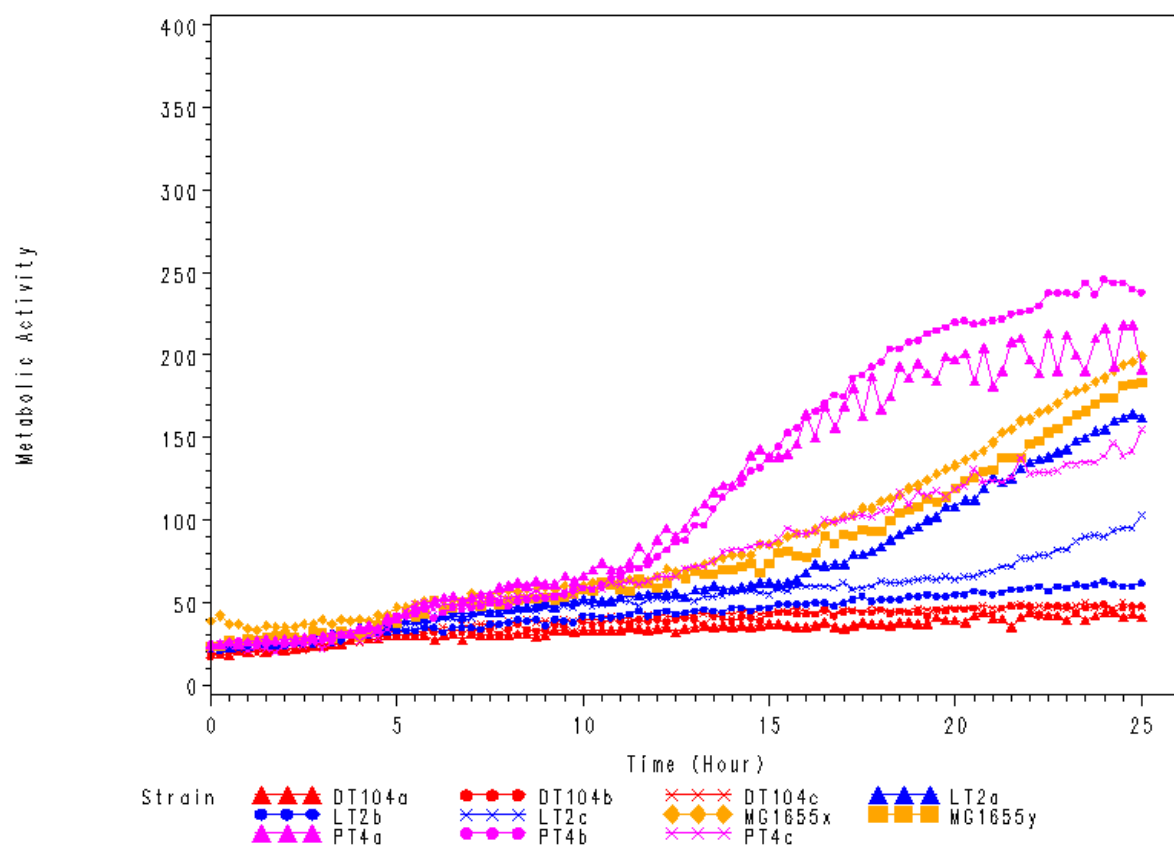

Kinetic Data of Carbon Source Utilisation

PM02A, F01 (D-Lactic Acid Methyl Ester)

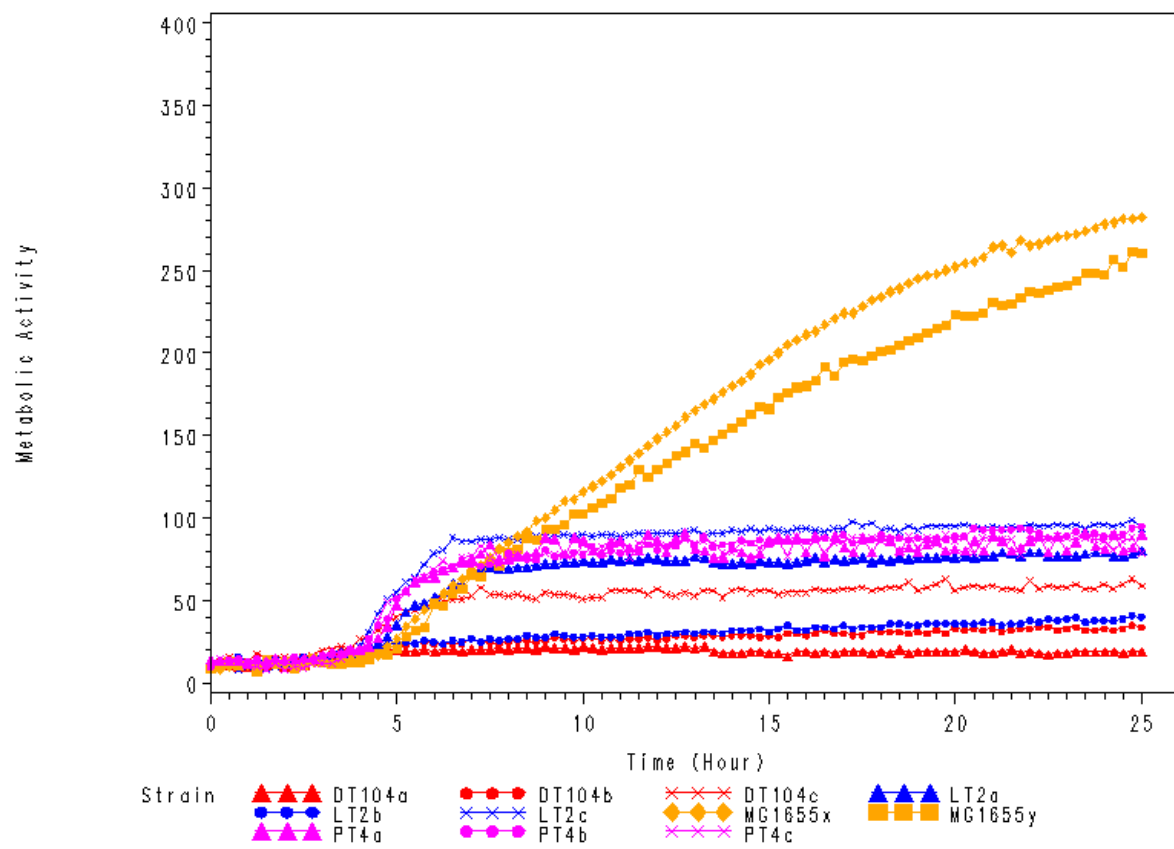

PM02A, F02 (Malonic Acid)

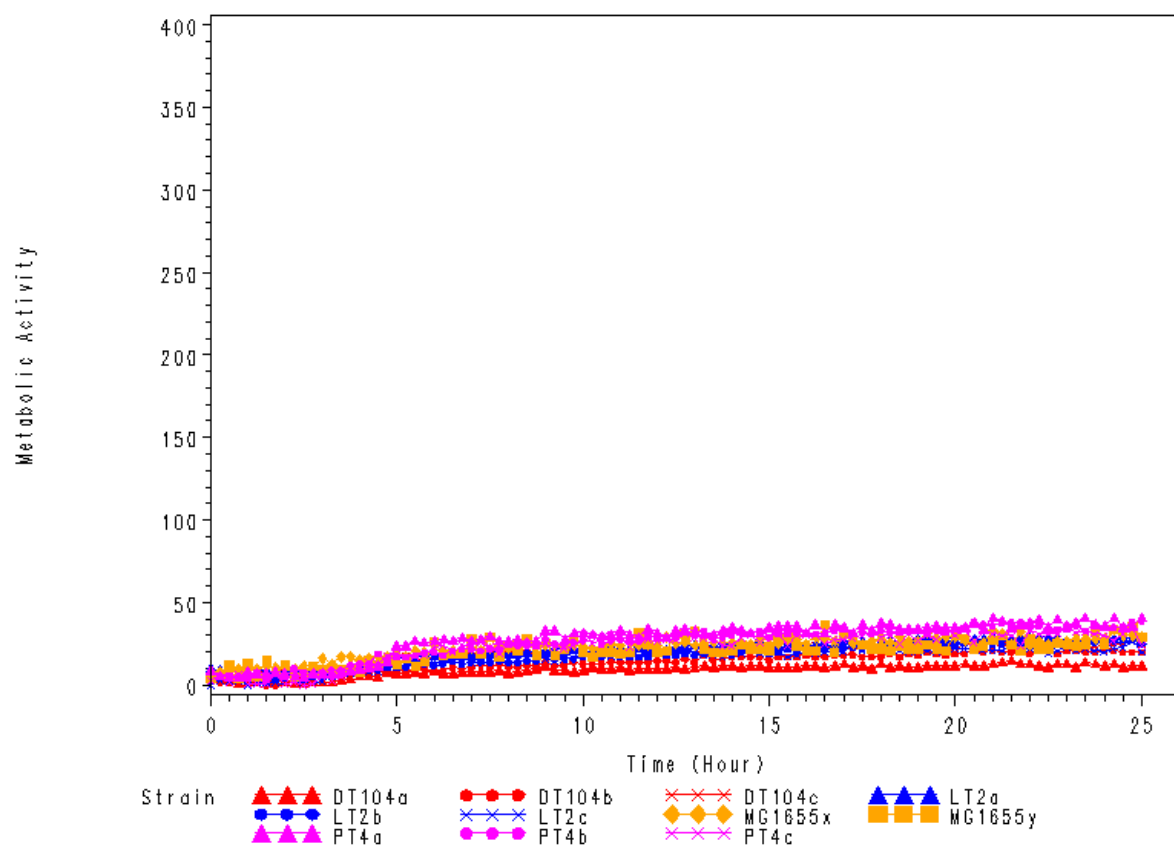

PM02A, F03 (Melibionic Acid)

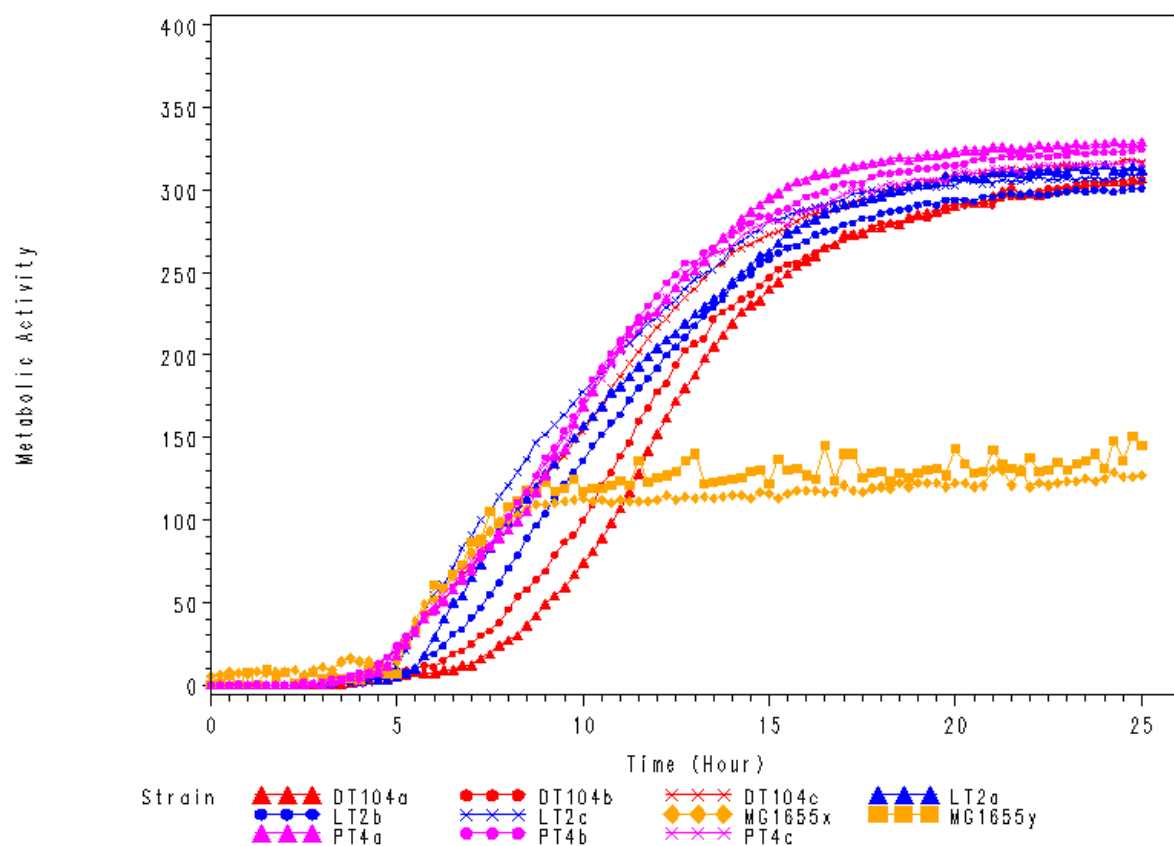

Kinetic Data of Carbon Source Utilisation

PM02A, F04 (Oxalic Acid)

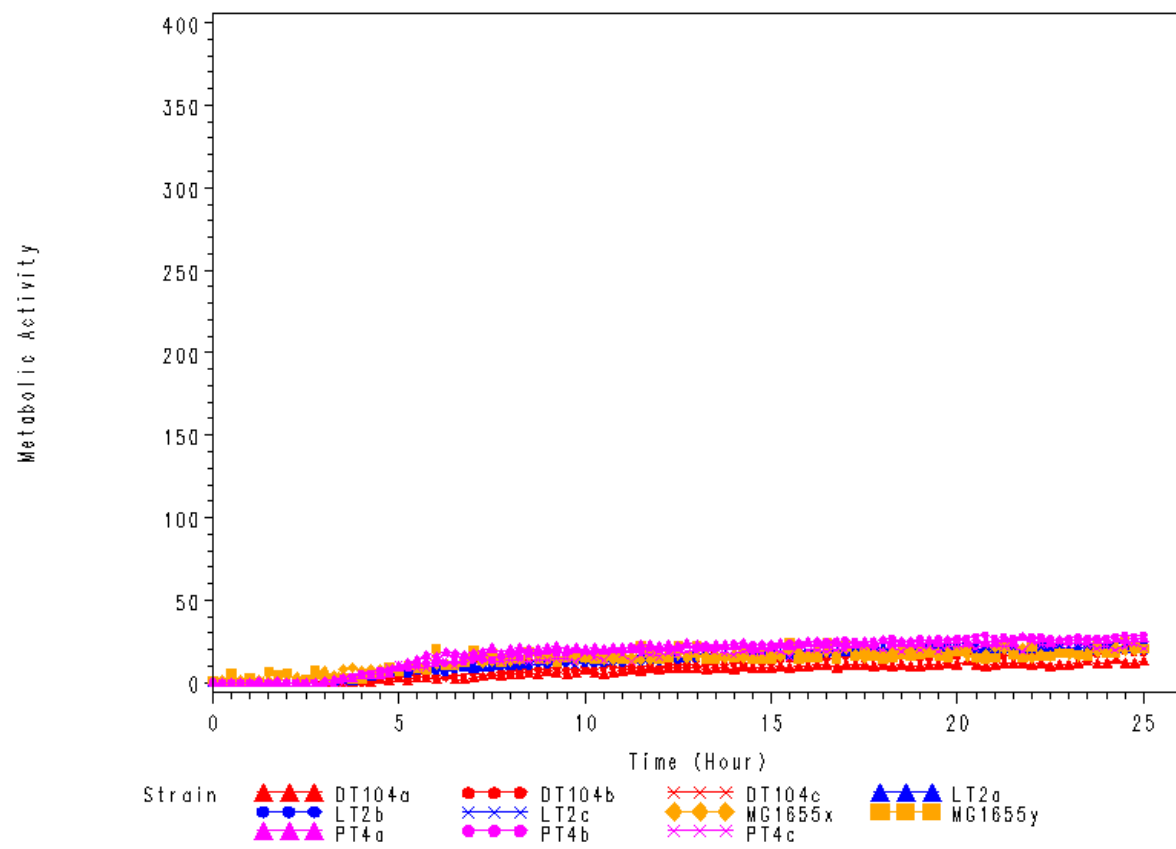

PM02A, F05 (Oxalomalic Acid)

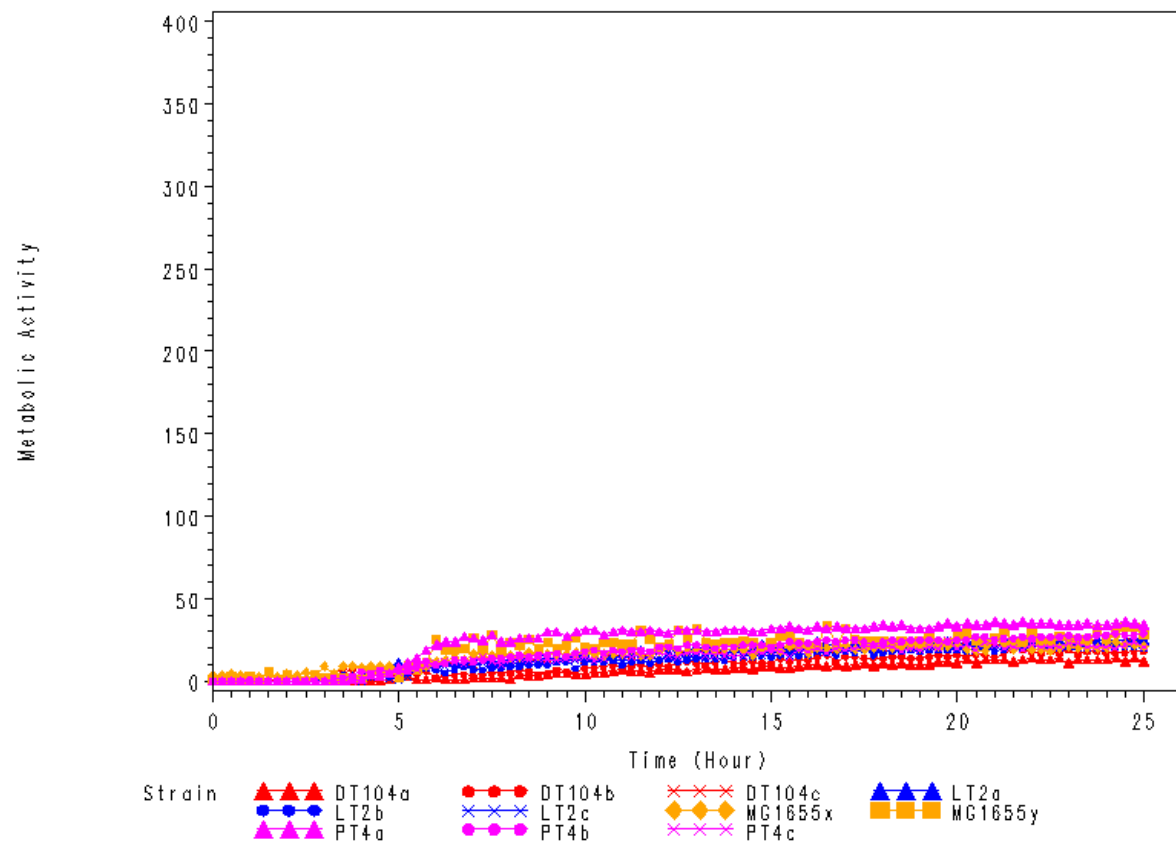

PM02A, F06 (Quinic Acid)

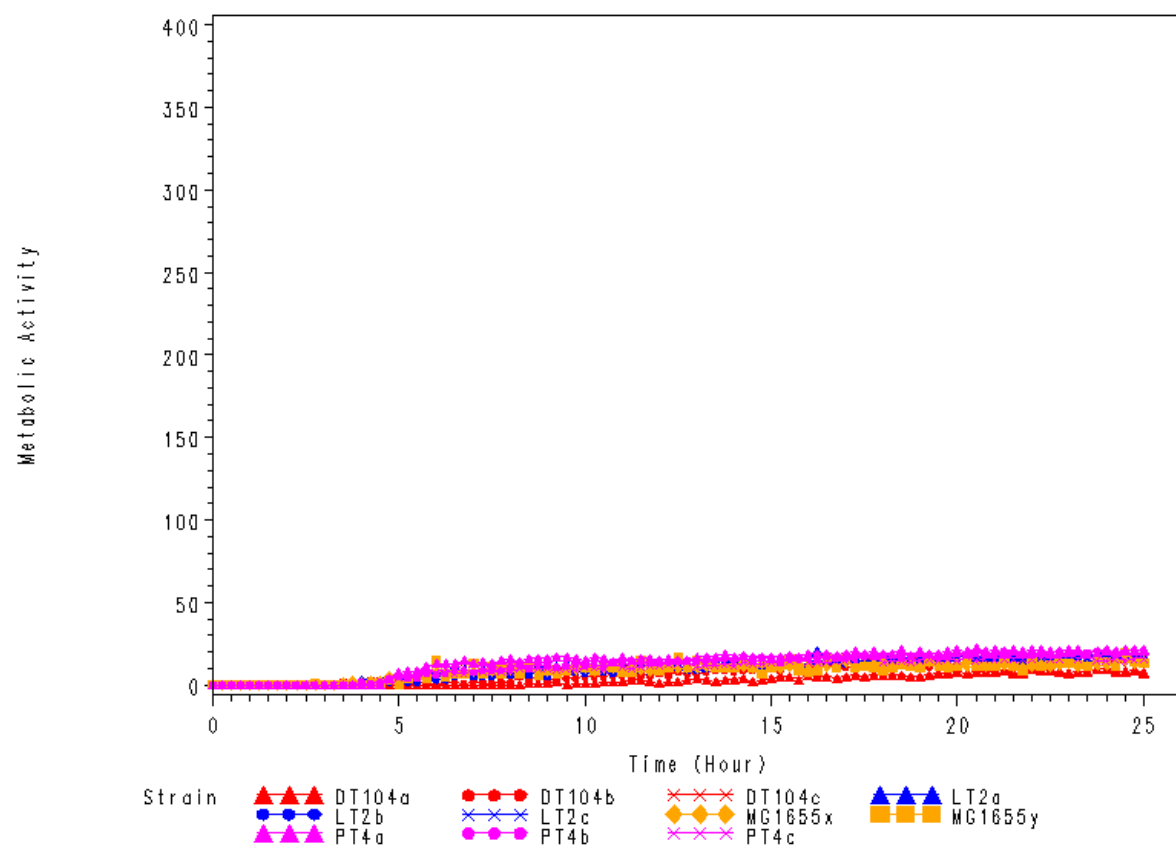

Kinetic Data of Carbon Source Utilisation

PM02A, F07 (D-Ribono-1,4-Lactone)

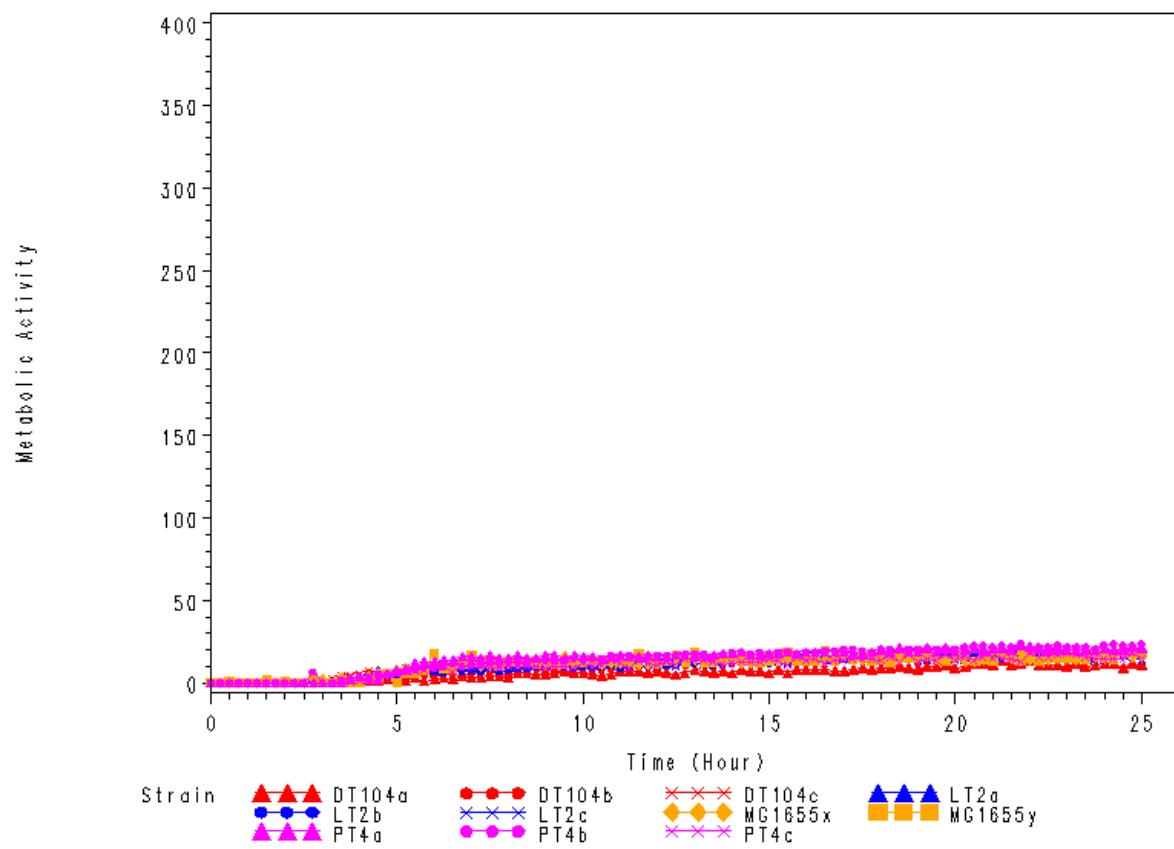

PM02A, F08 (Sebacic Acid)

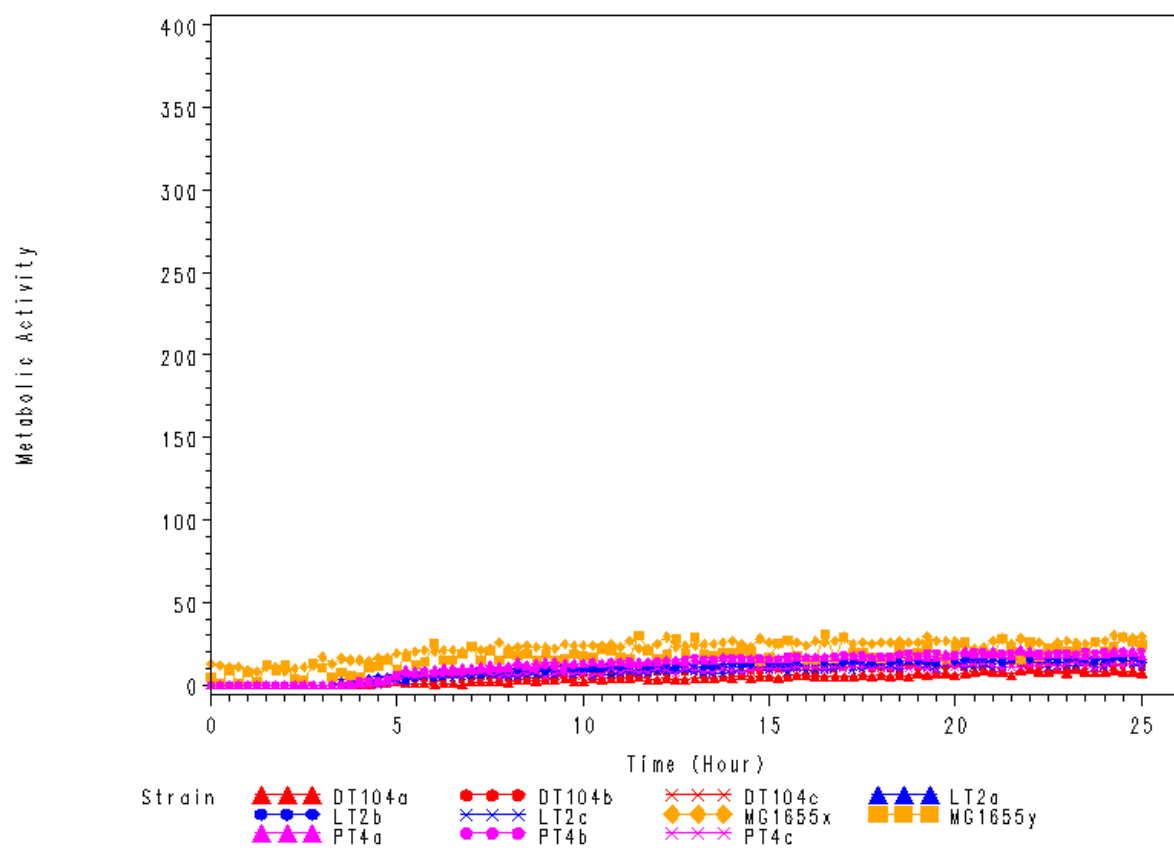

PM02A, F09 (Sorbic Acid)

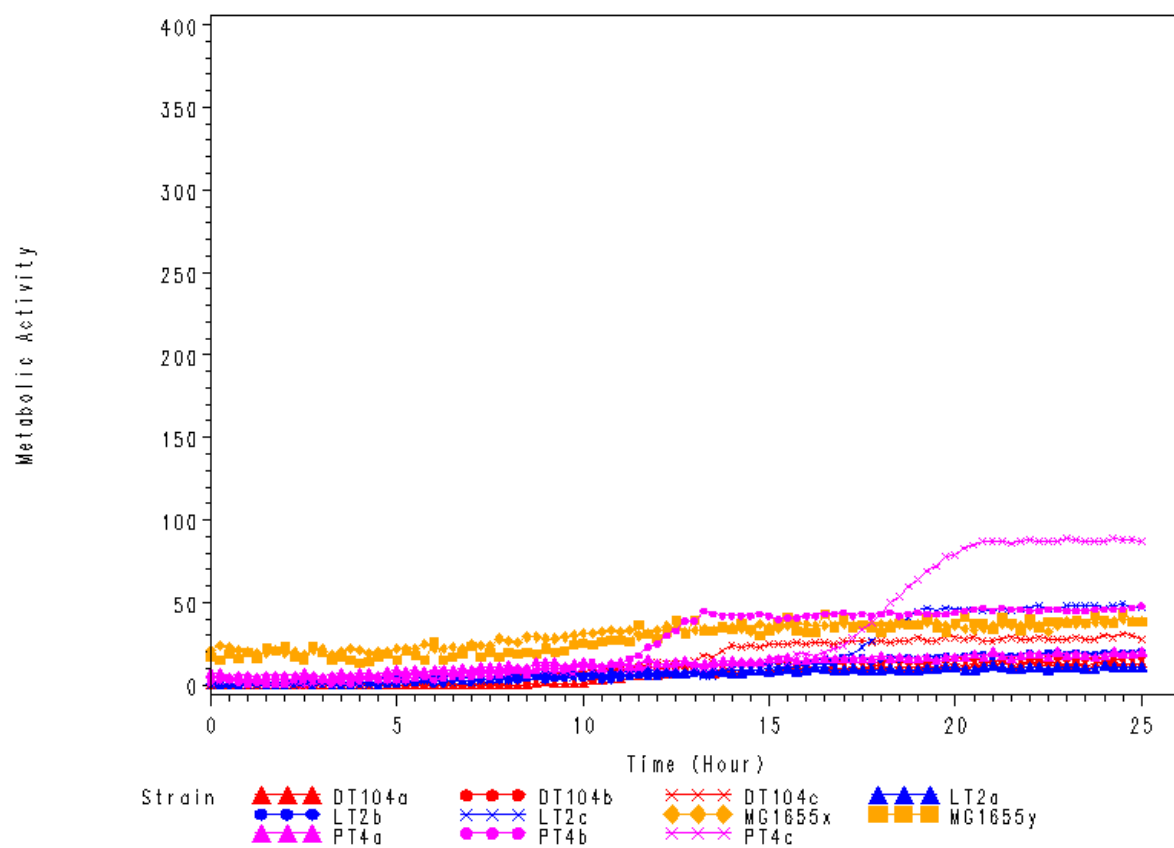

Kinetic Data of Carbon Source Utilisation

PM02A, F10 (Succinamic Acid)

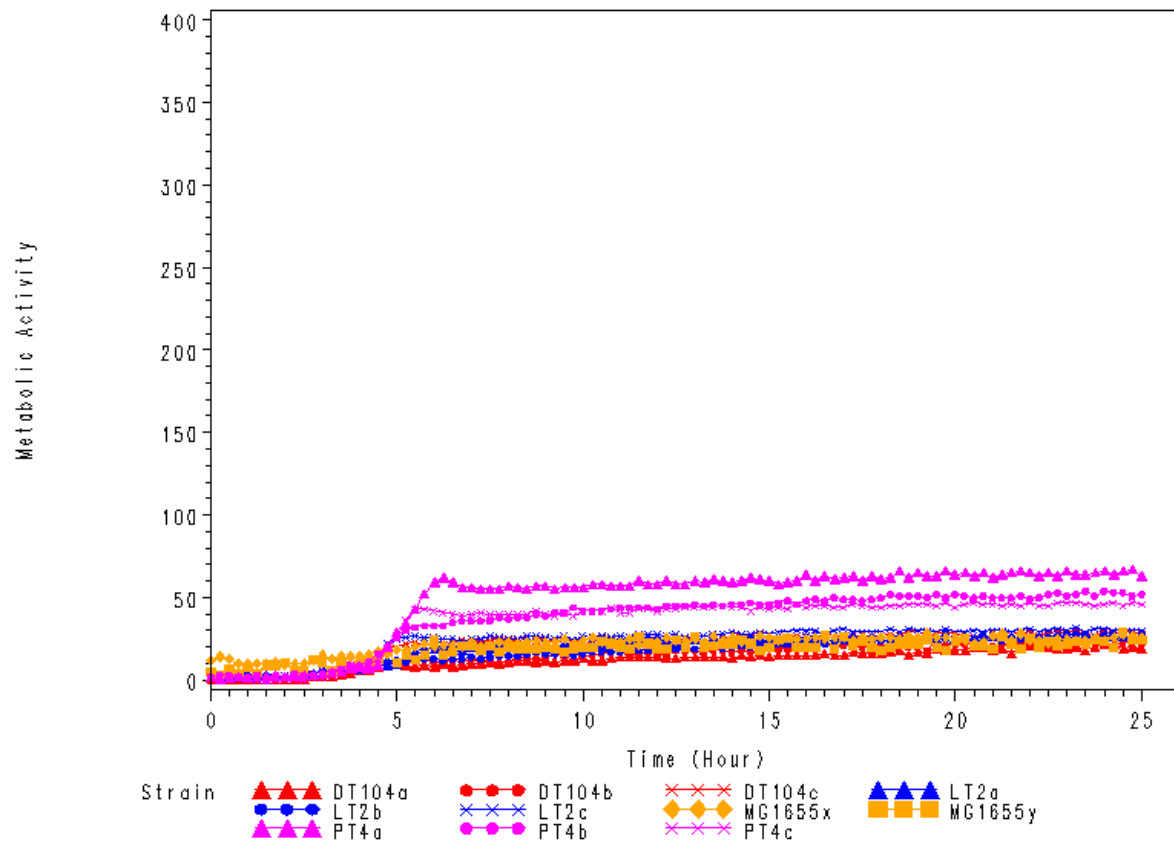

PM02A, F11 (D-Tartaric Acid)

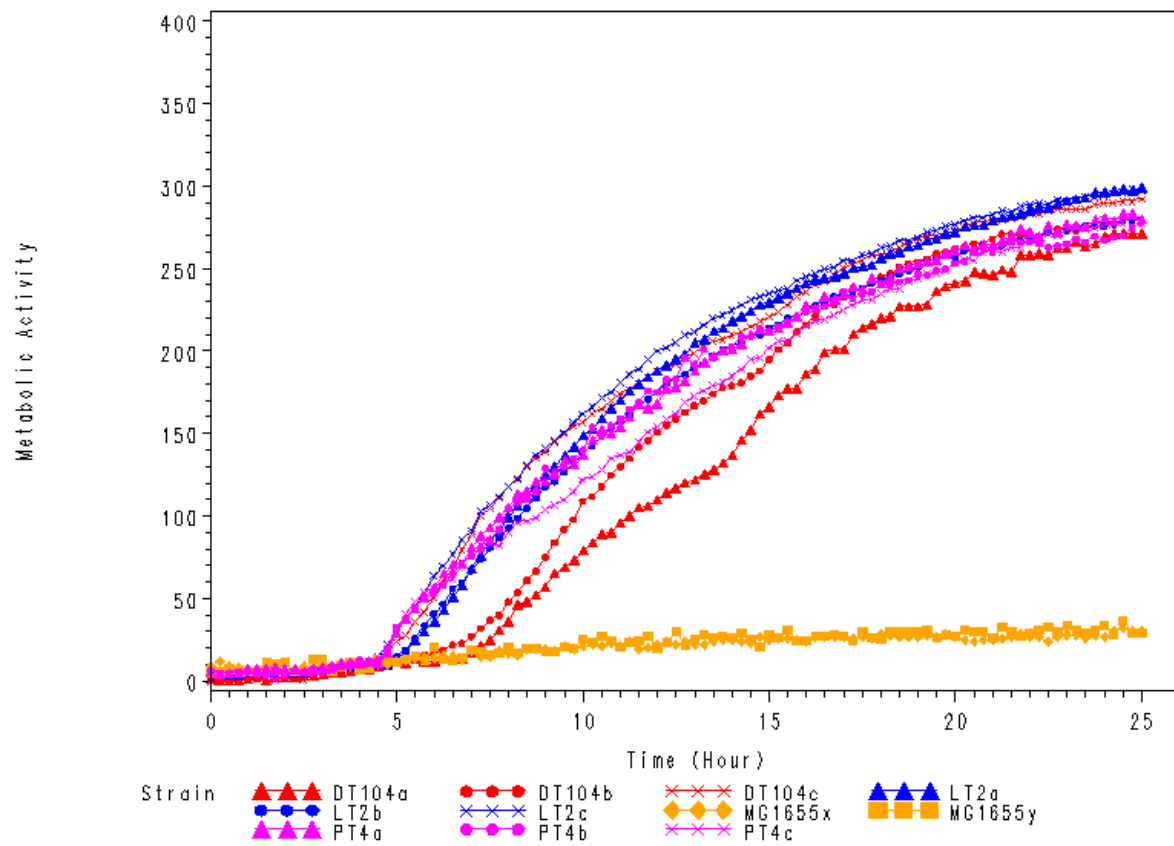

PM02A, F12 (L-Tartaric Acid)

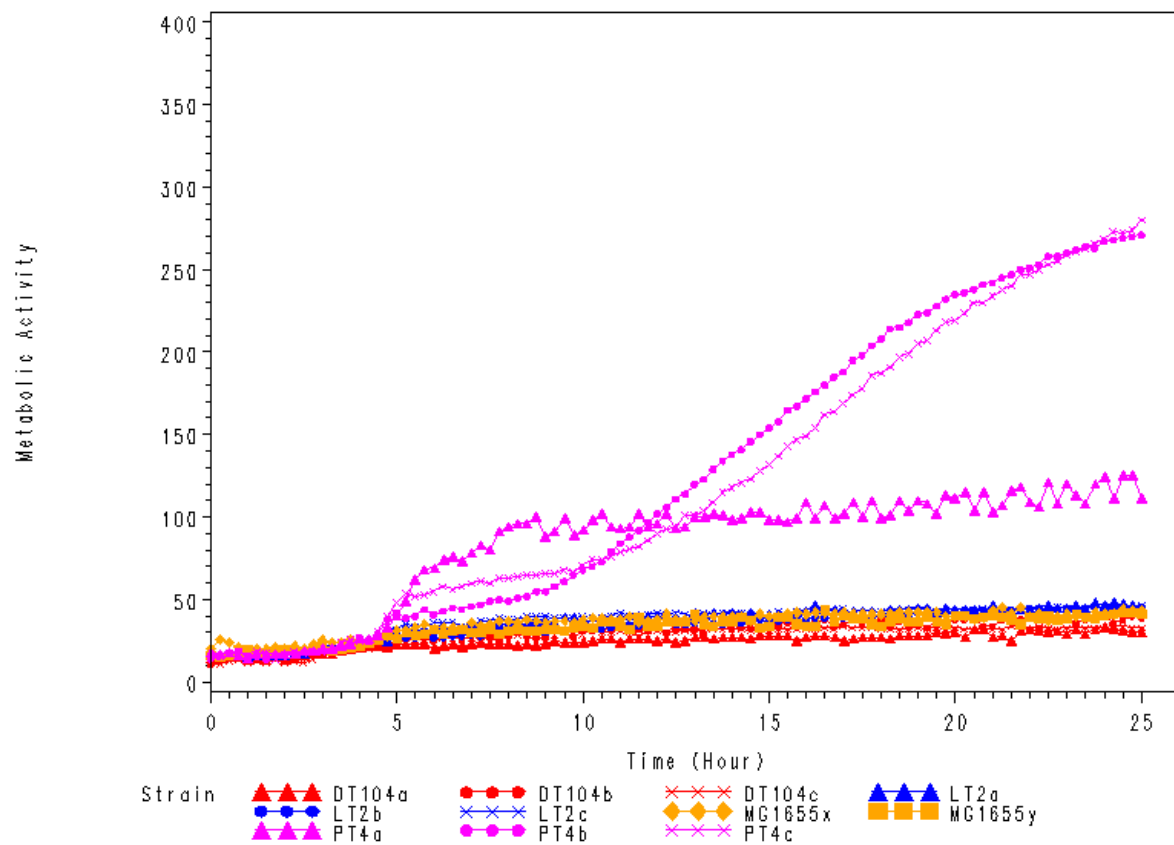



Kinetic Data of Carbon Source Utilisation

PM02A, G01 (Acetamide)

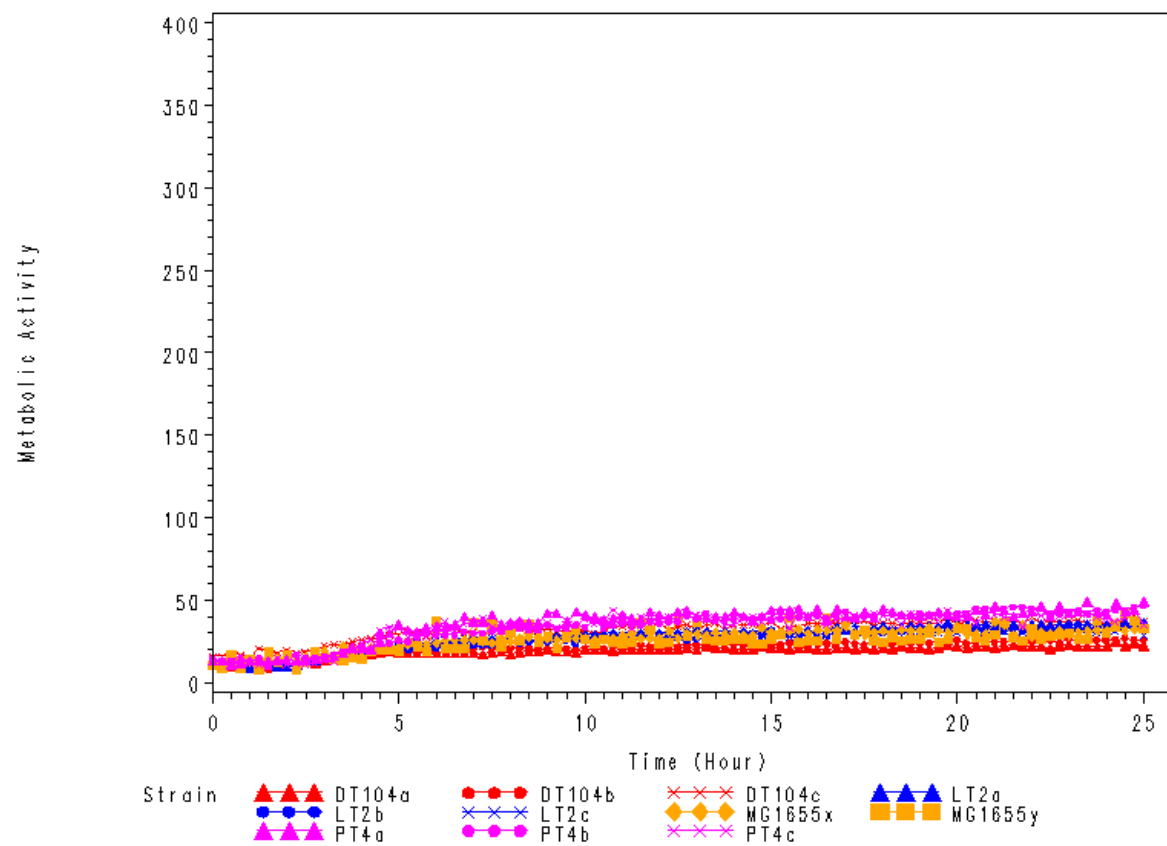

PM02A, G02 (L-Alaninamide)

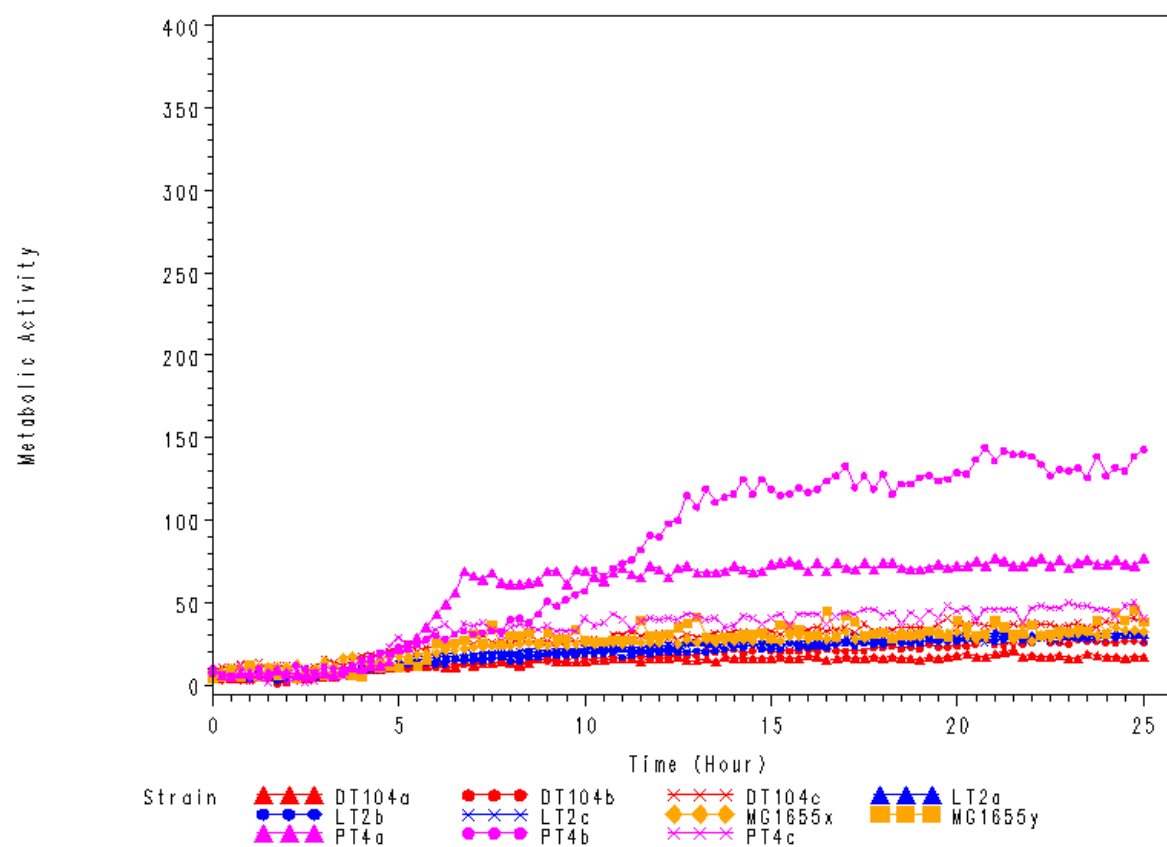

PM02A, G03 (N-Acetyl-L-Glutamic Acid)

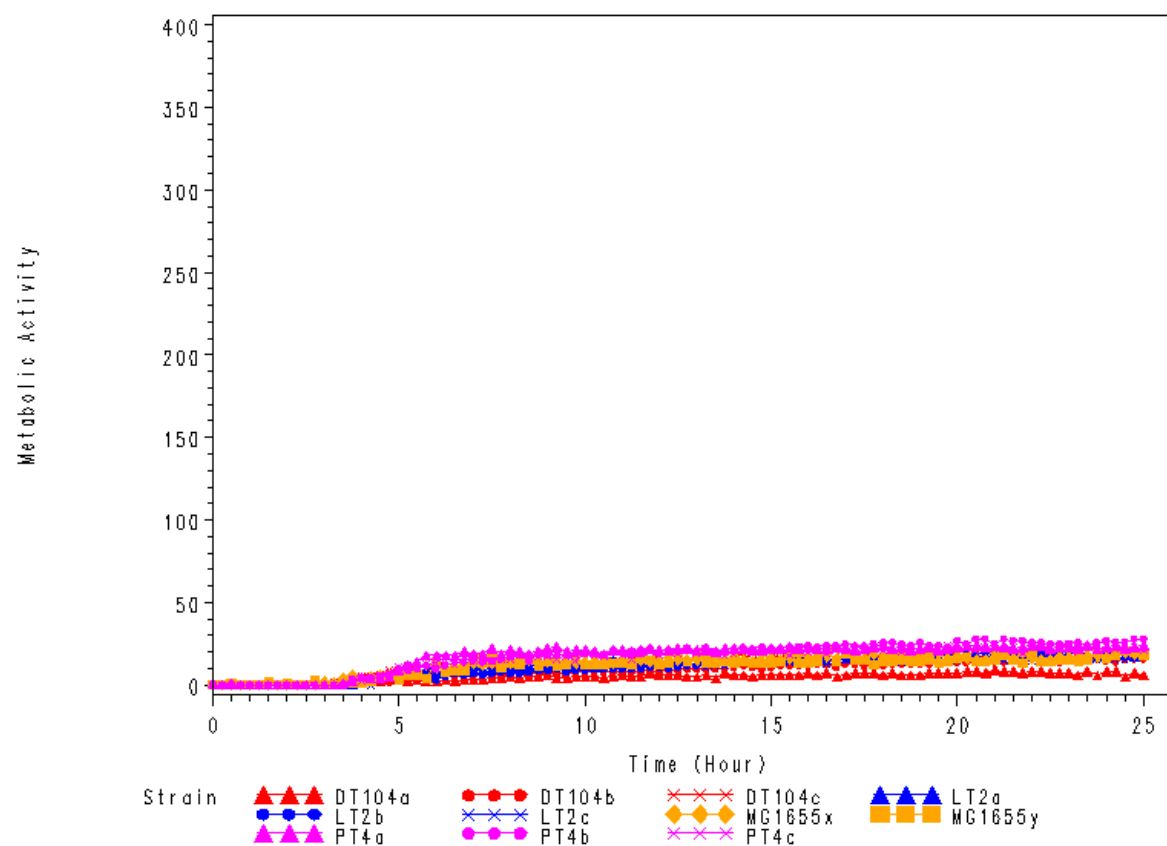

Kinetic Data of Carbon Source Utilisation

PM02A, G04 (L-Arginine)

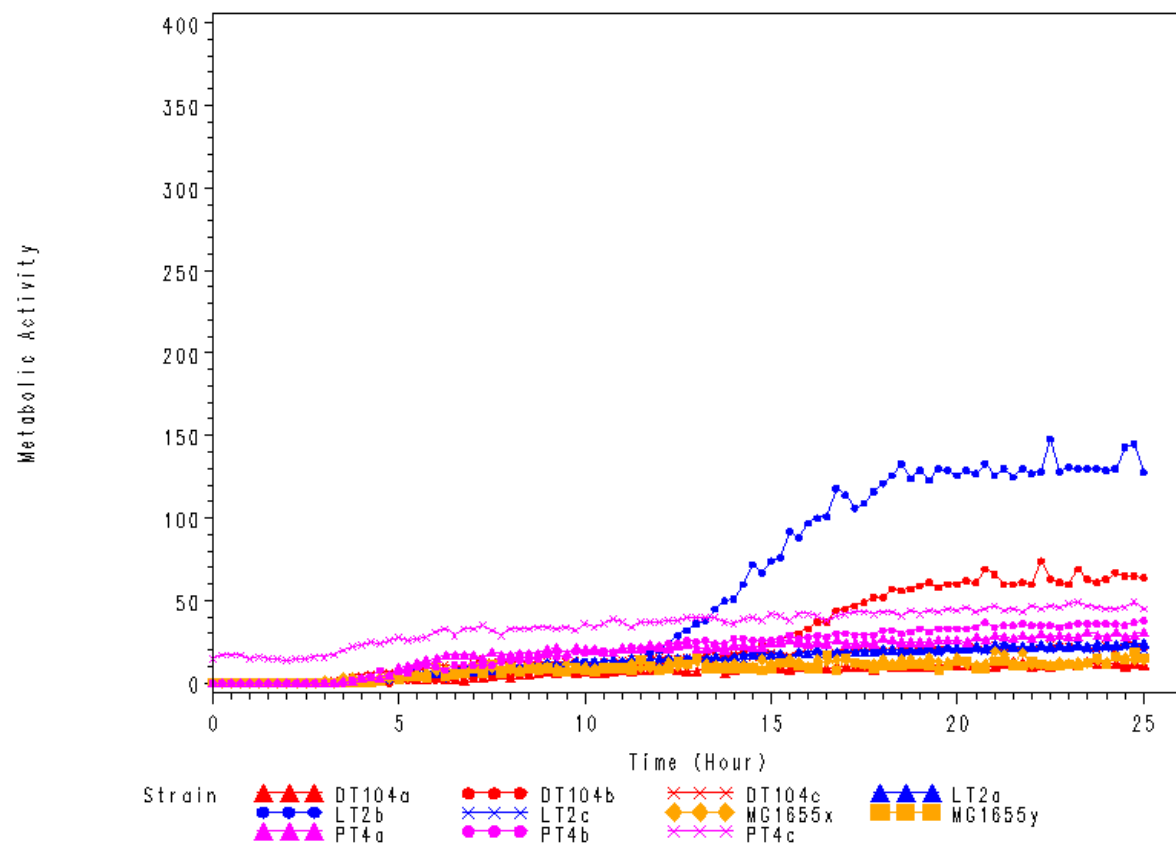

PM02A, G05 (Glycine)

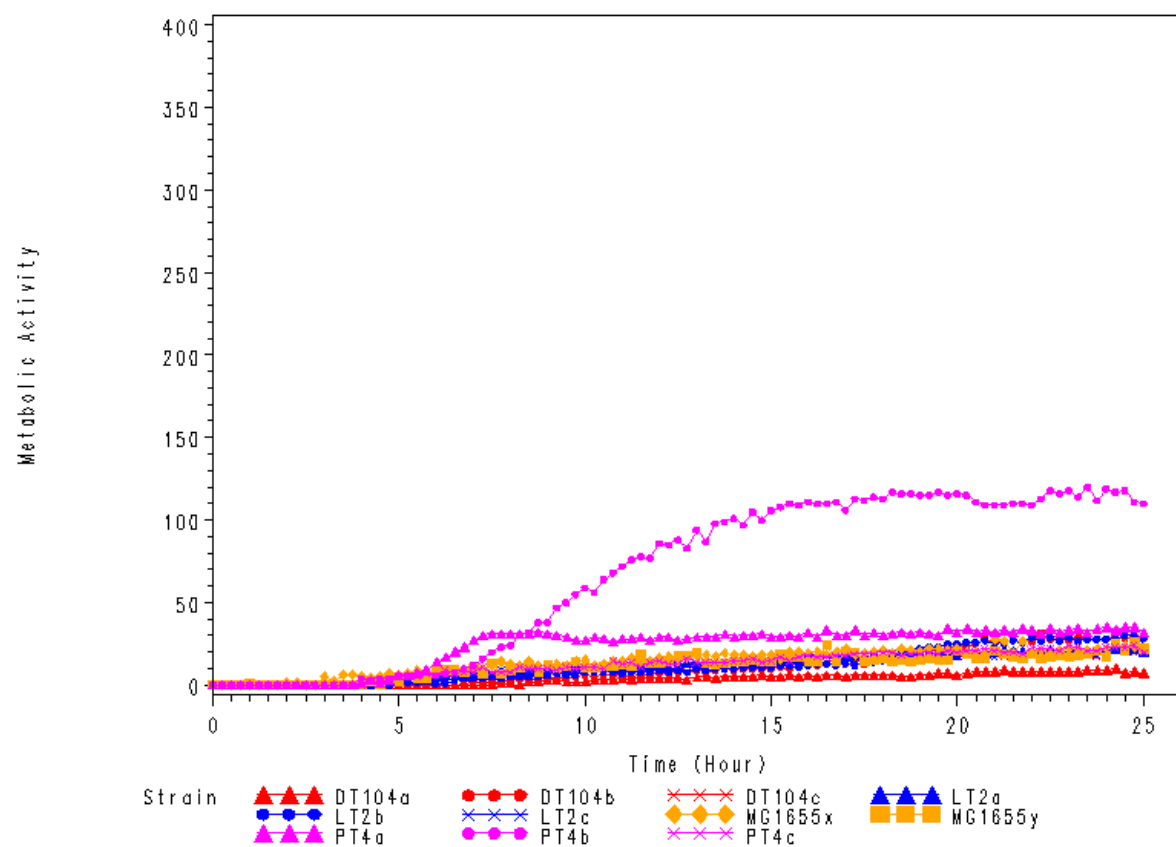

PM02A, G06 (L-Histidine)

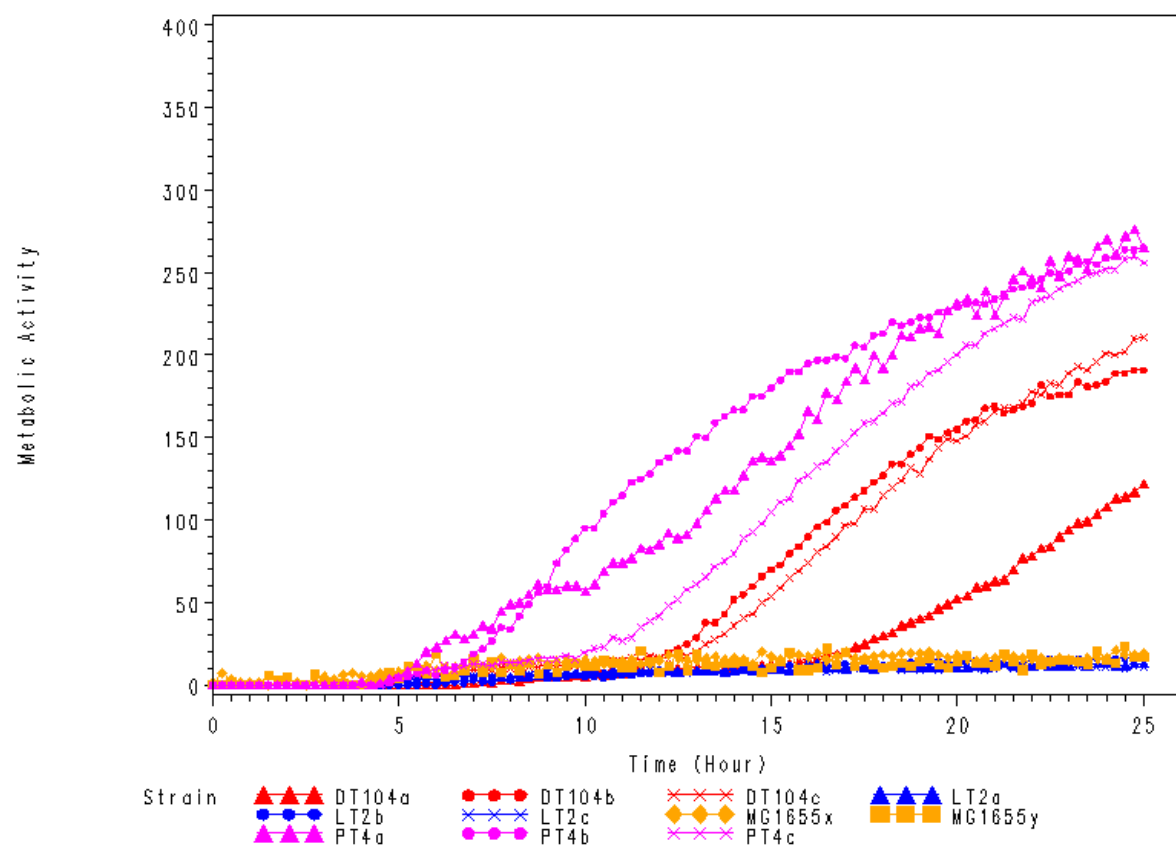

Kinetic Data of Carbon Source Utilisation

PM02A, G07 (L-Homoserine)

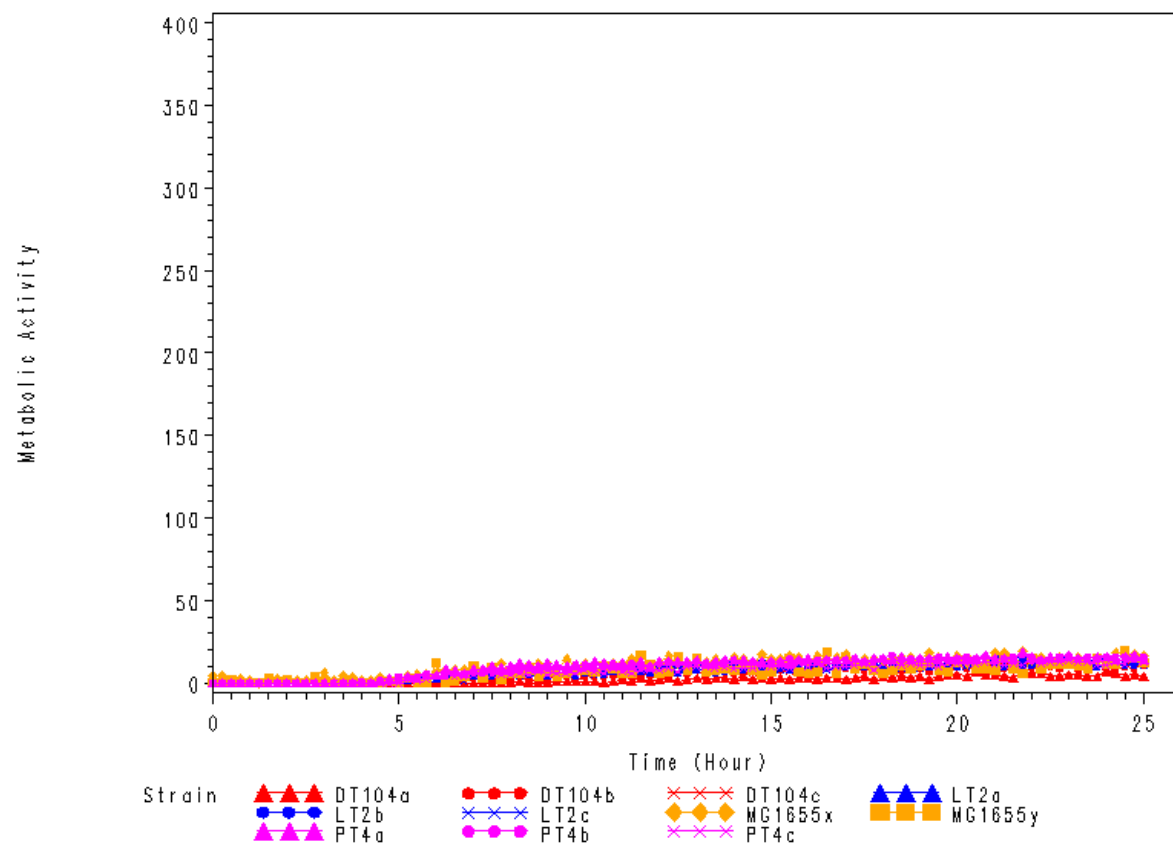

PM02A, G08 (4-Hydroxy-L-Proline (trans))

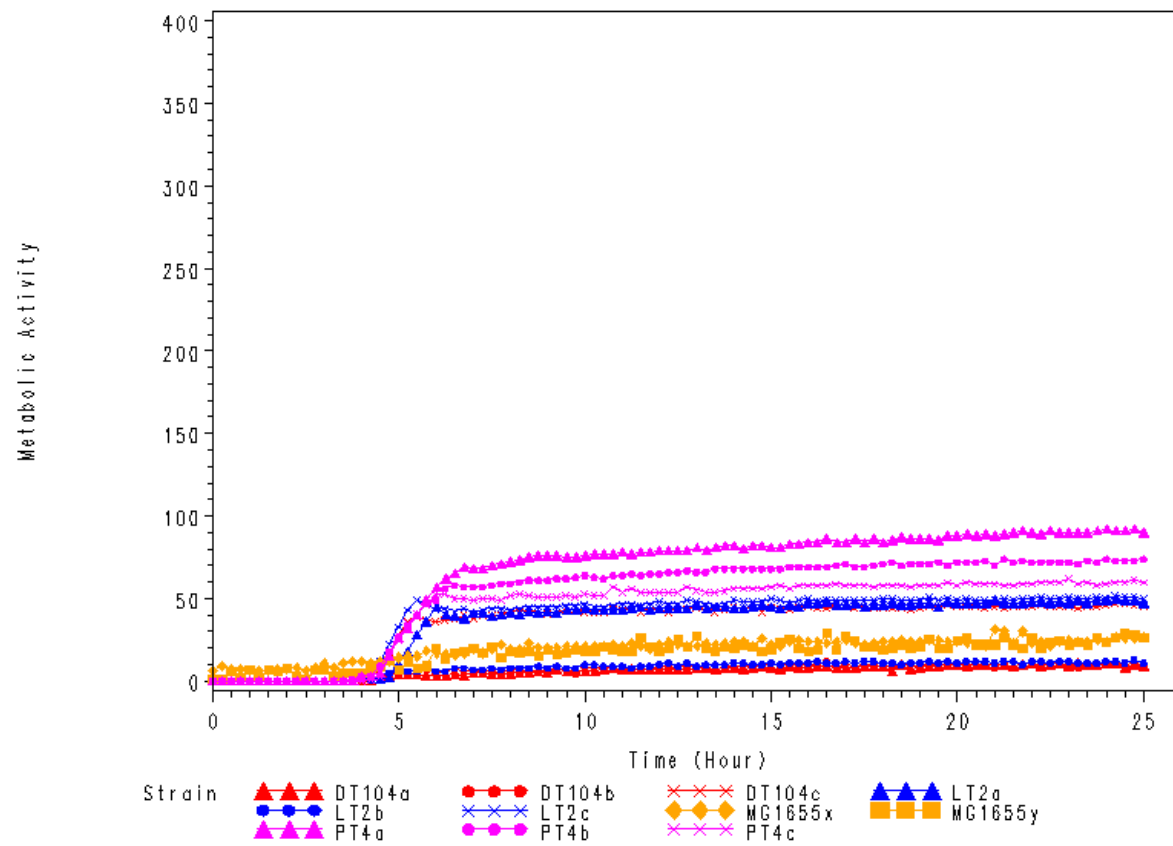

PM02A, G09 (L-Isoleucine)

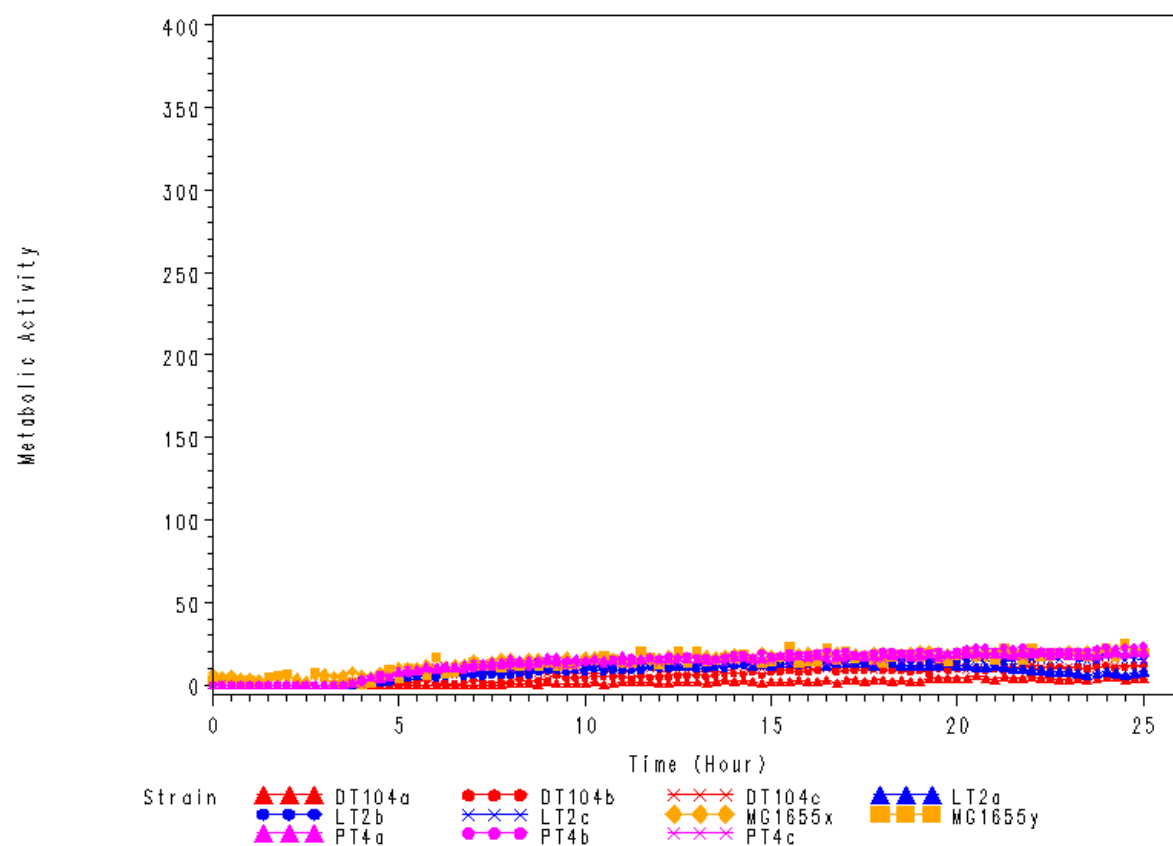

Kinetic Data of Carbon Source Utilisation

PM02A, G10 (L-Leucine)

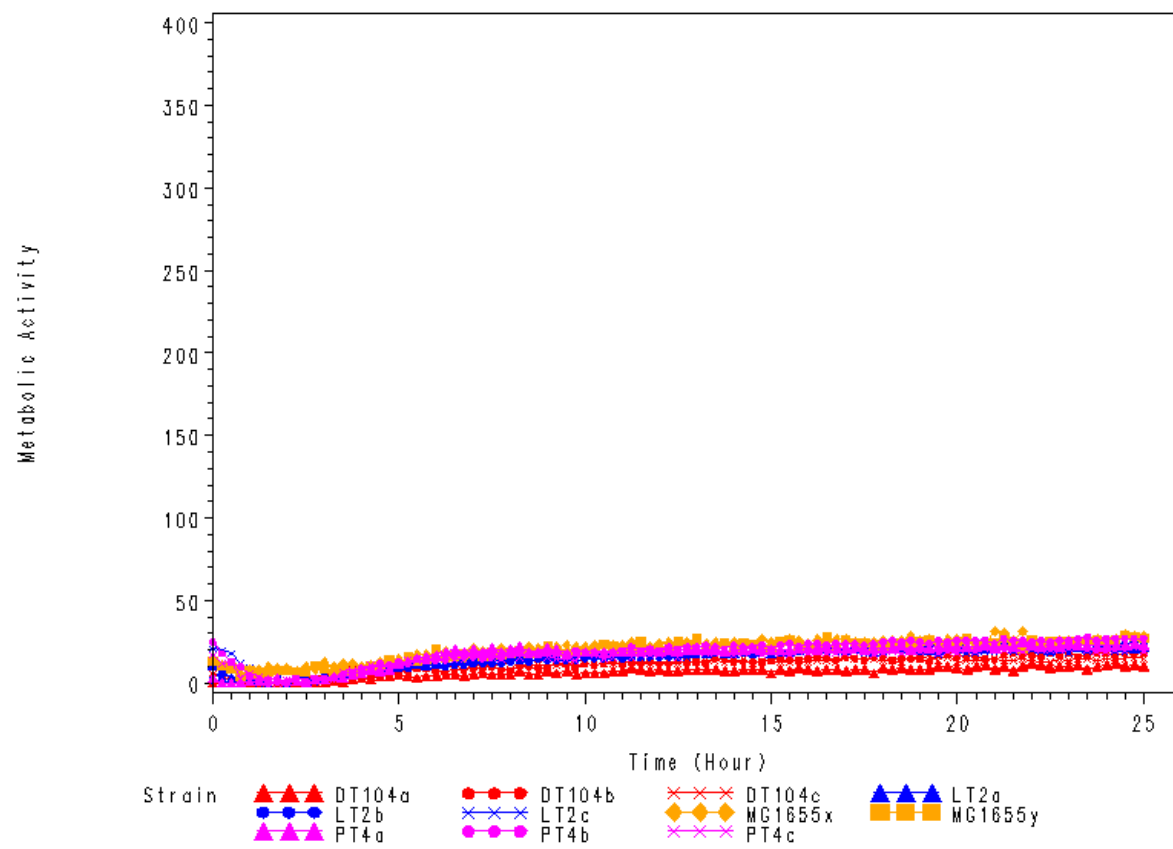

PM02A, G11 (L-Lysine)

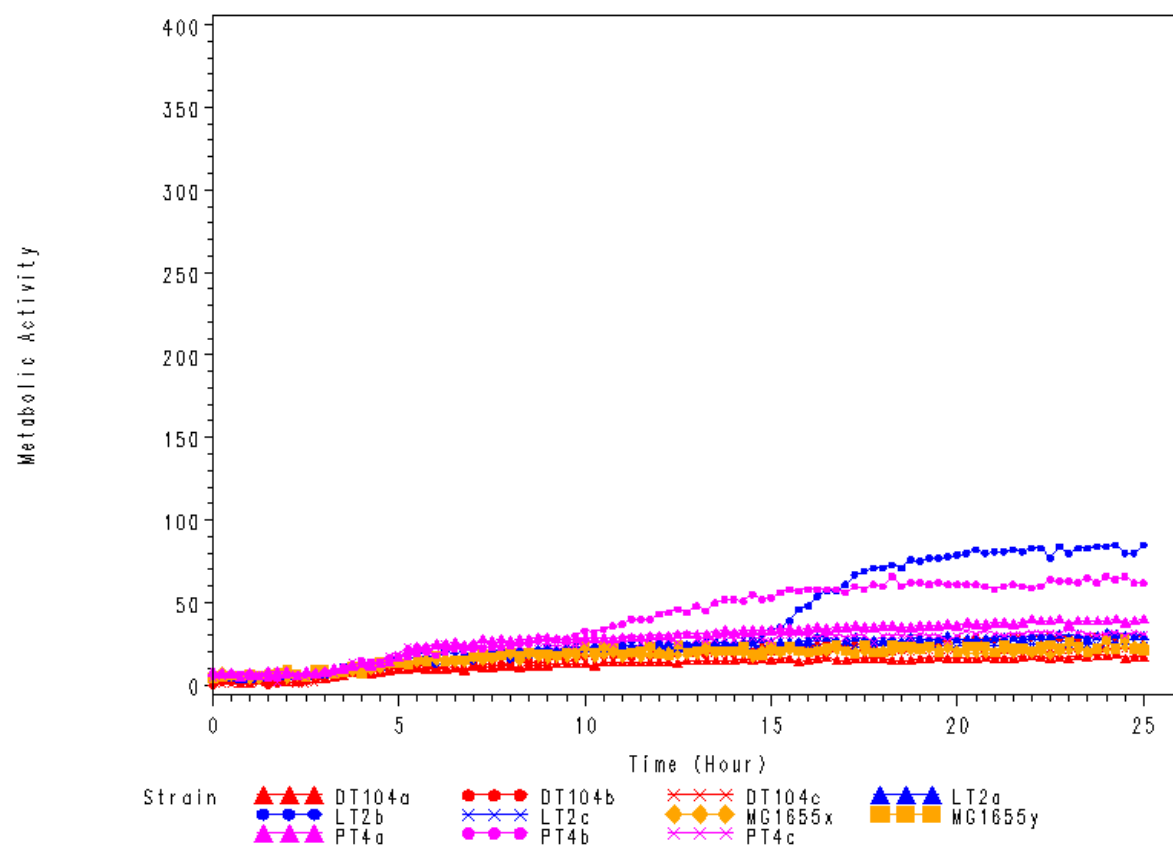

PM02A, G12 (L-Methionine)

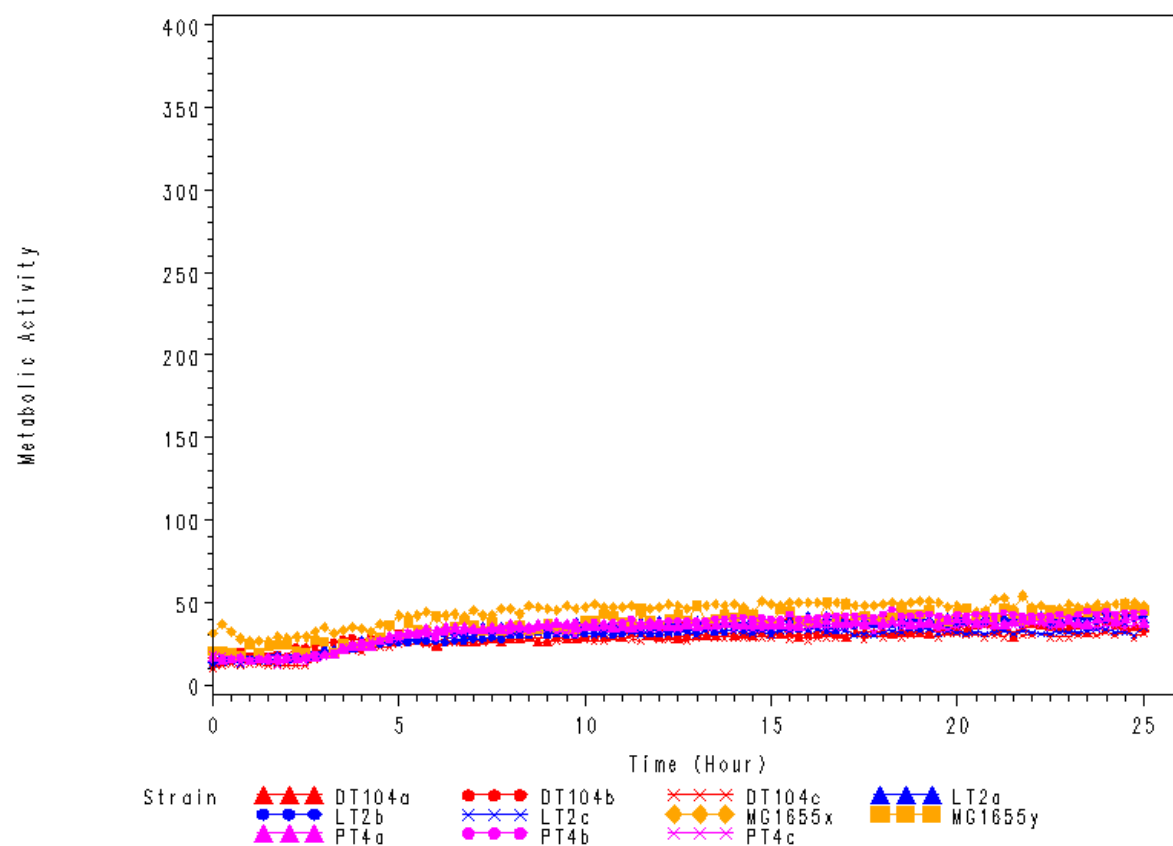

Kinetic Data of Carbon Source Utilisation

PM02A, H01 (L-Ornithine)

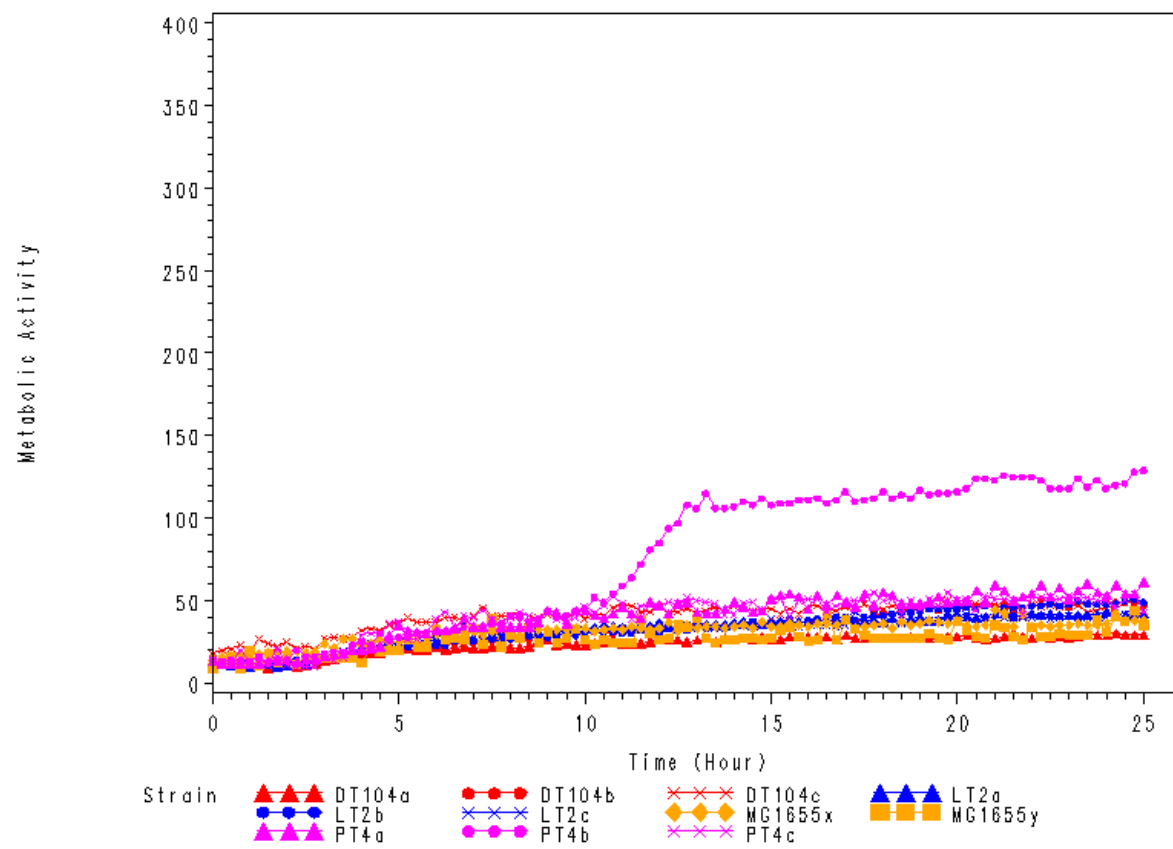

PM02A, H02 (L-Phenylalanine)

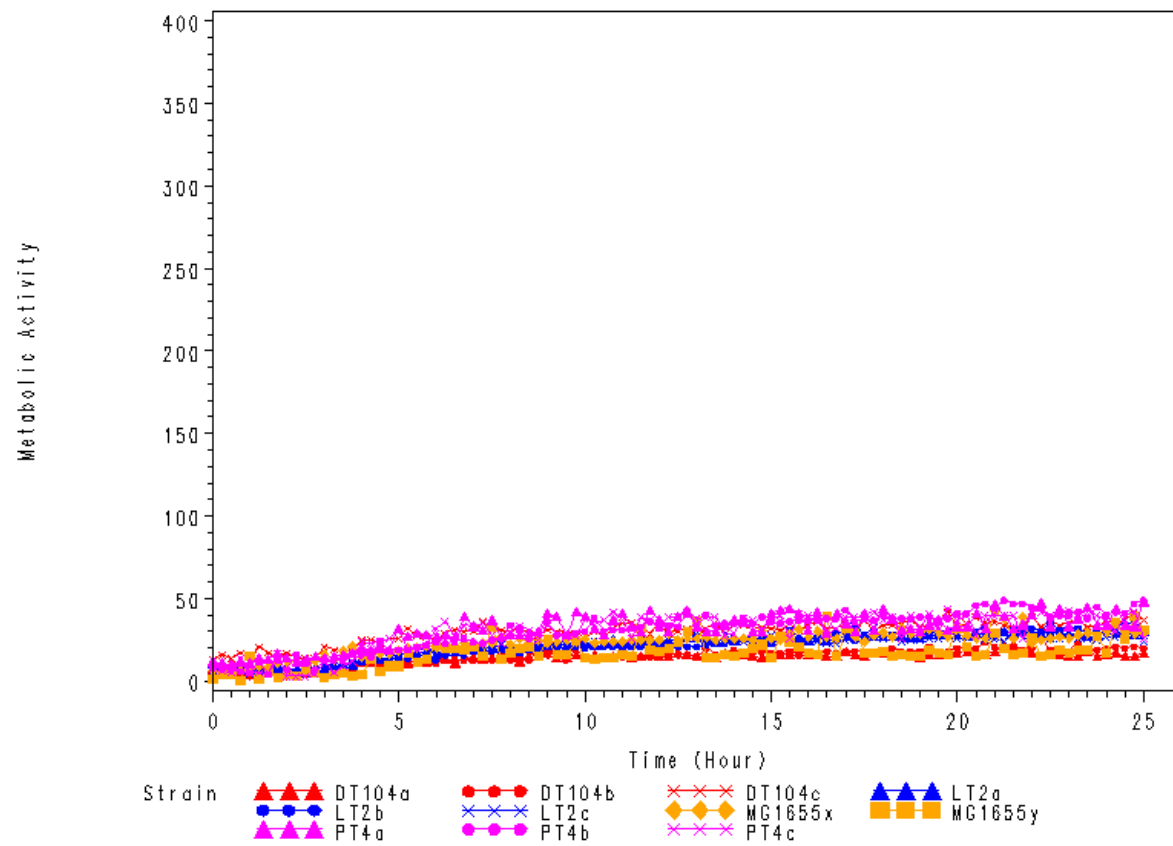

PM02A, H03 (L-Pyrroglutamic Acid)

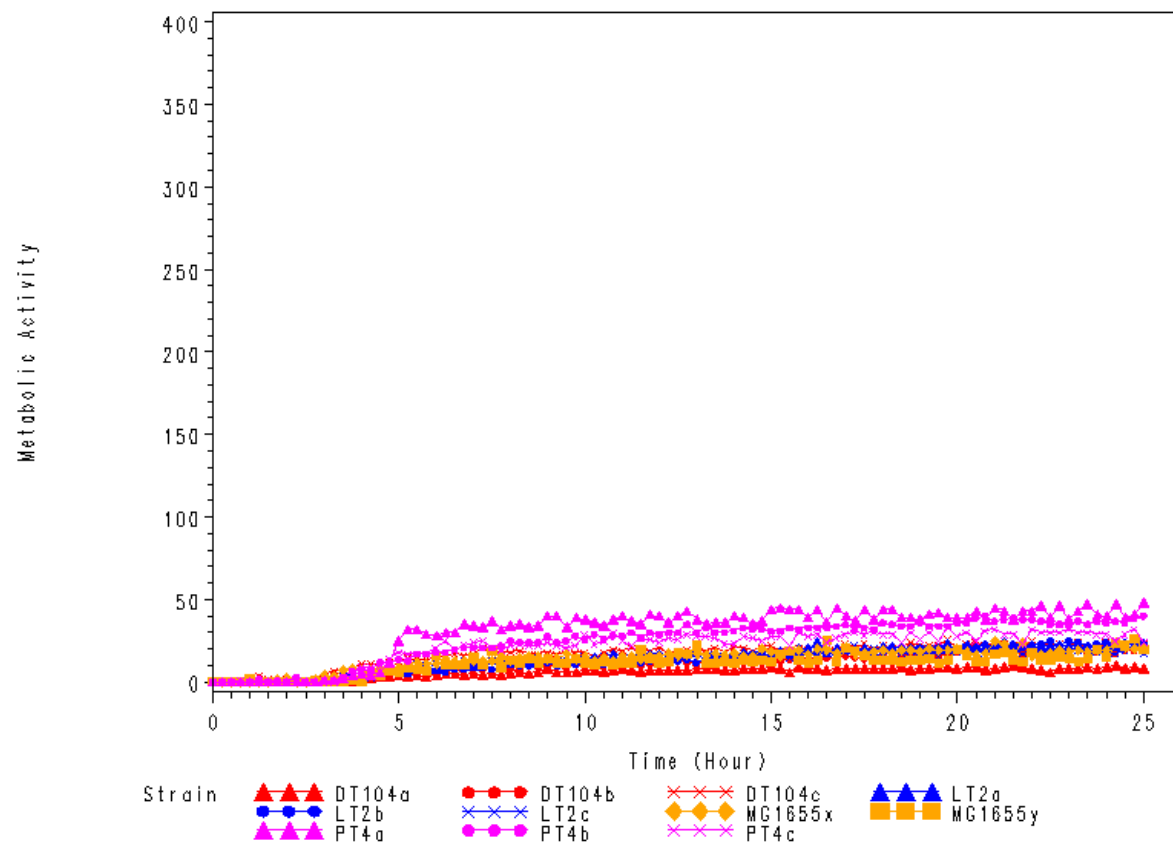

Kinetic Data of Carbon Source Utilisation

PM02A, H04 (L-Valine)

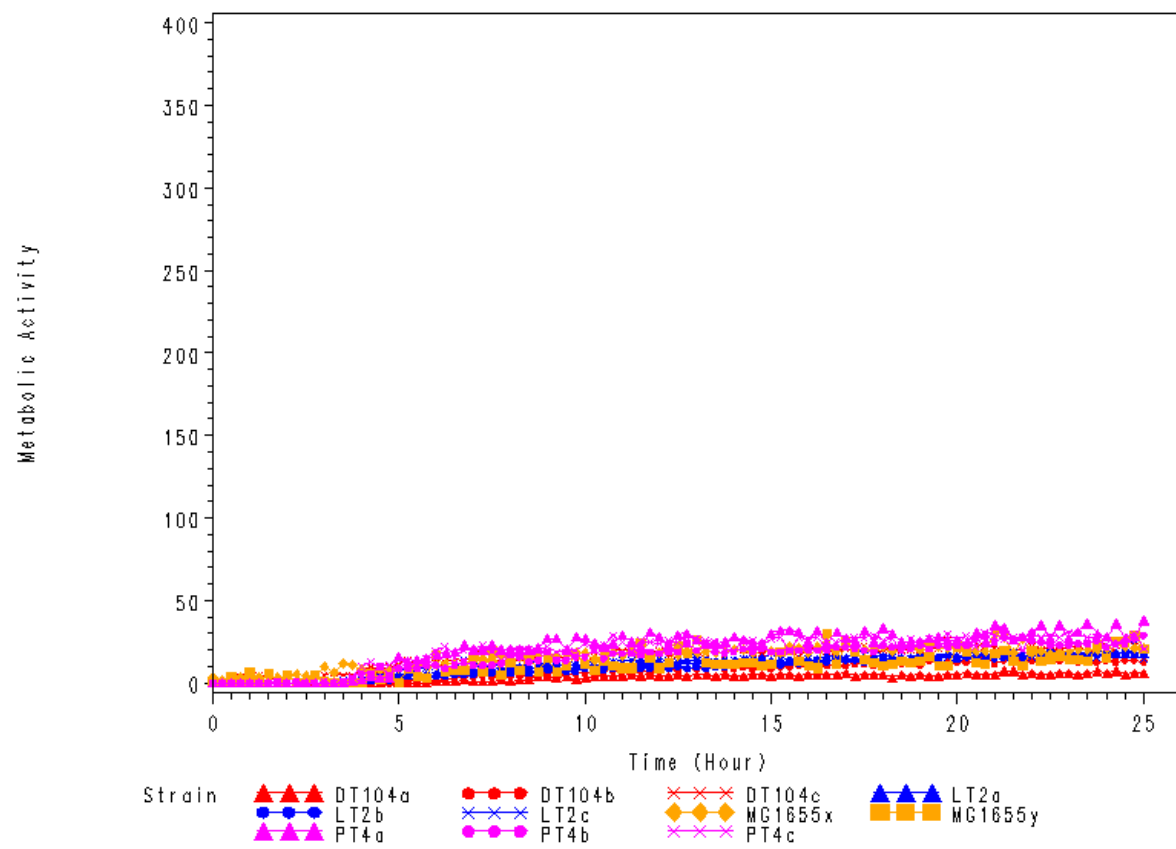

PM02A, H05 (D,L-Carnitine)

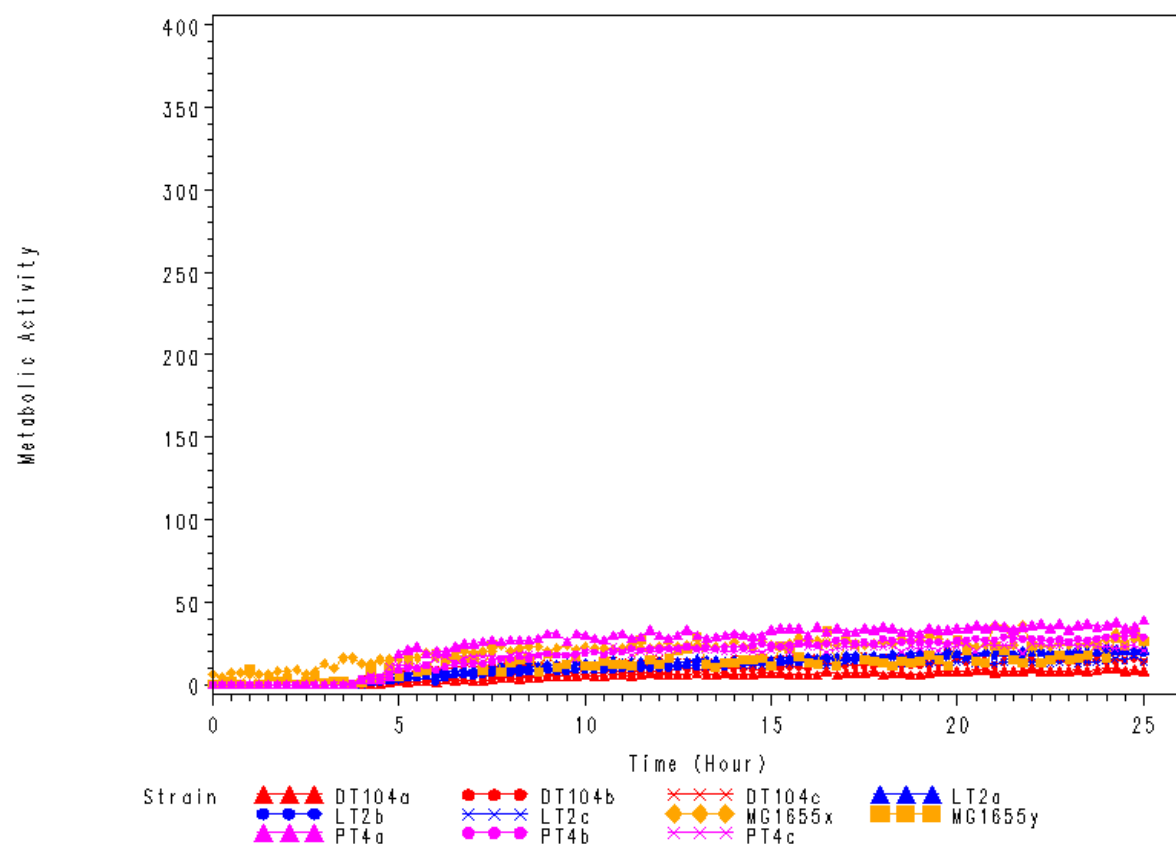

PM02A, H06 (Sec-Butylamine)

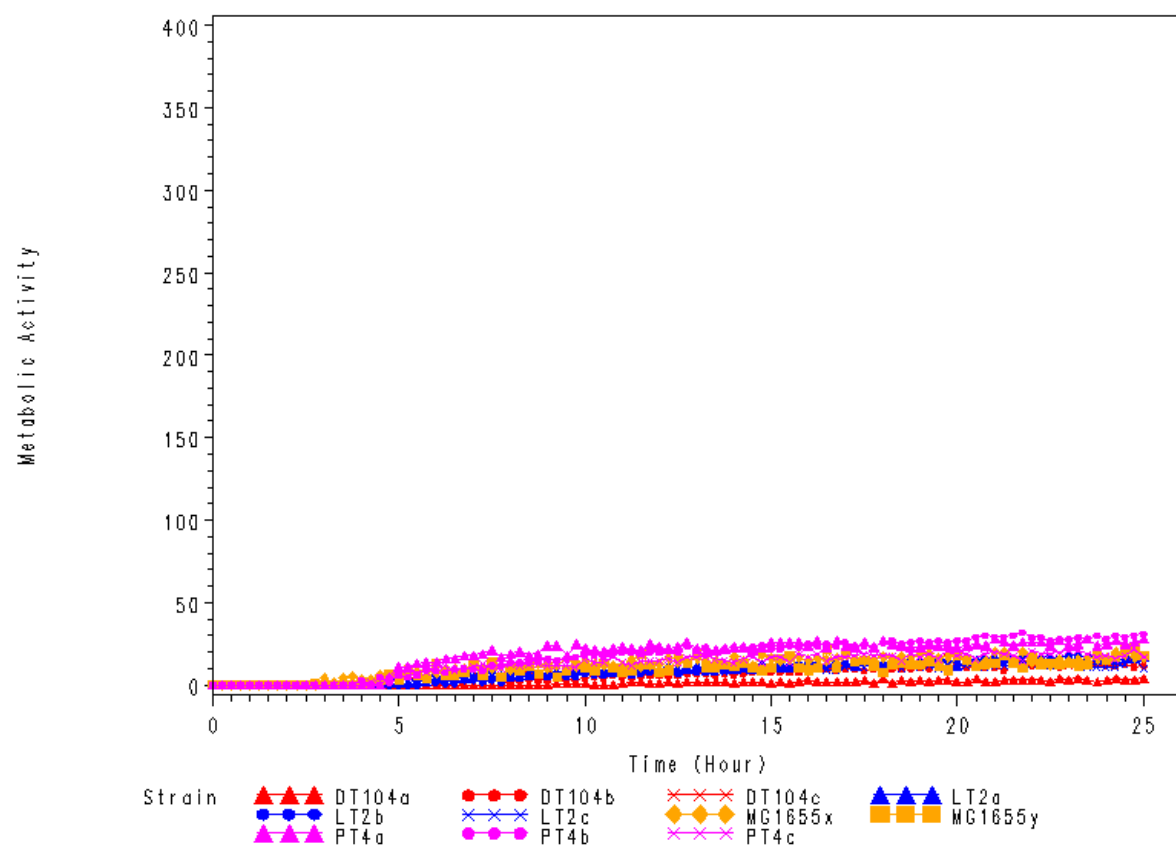

Kinetic Data of Carbon Source Utilisation

PM02A, H07 (D,L – Octopamine)

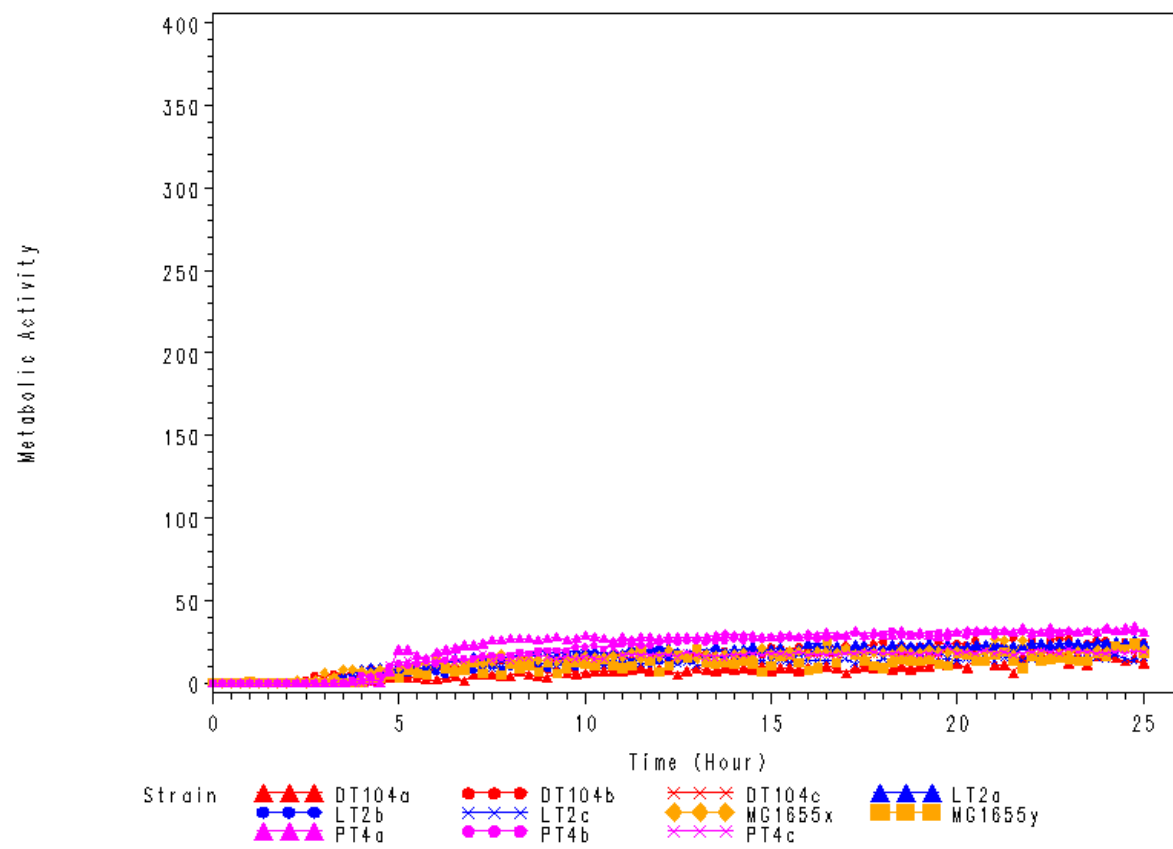

PM02A, H08 (Putrescine)

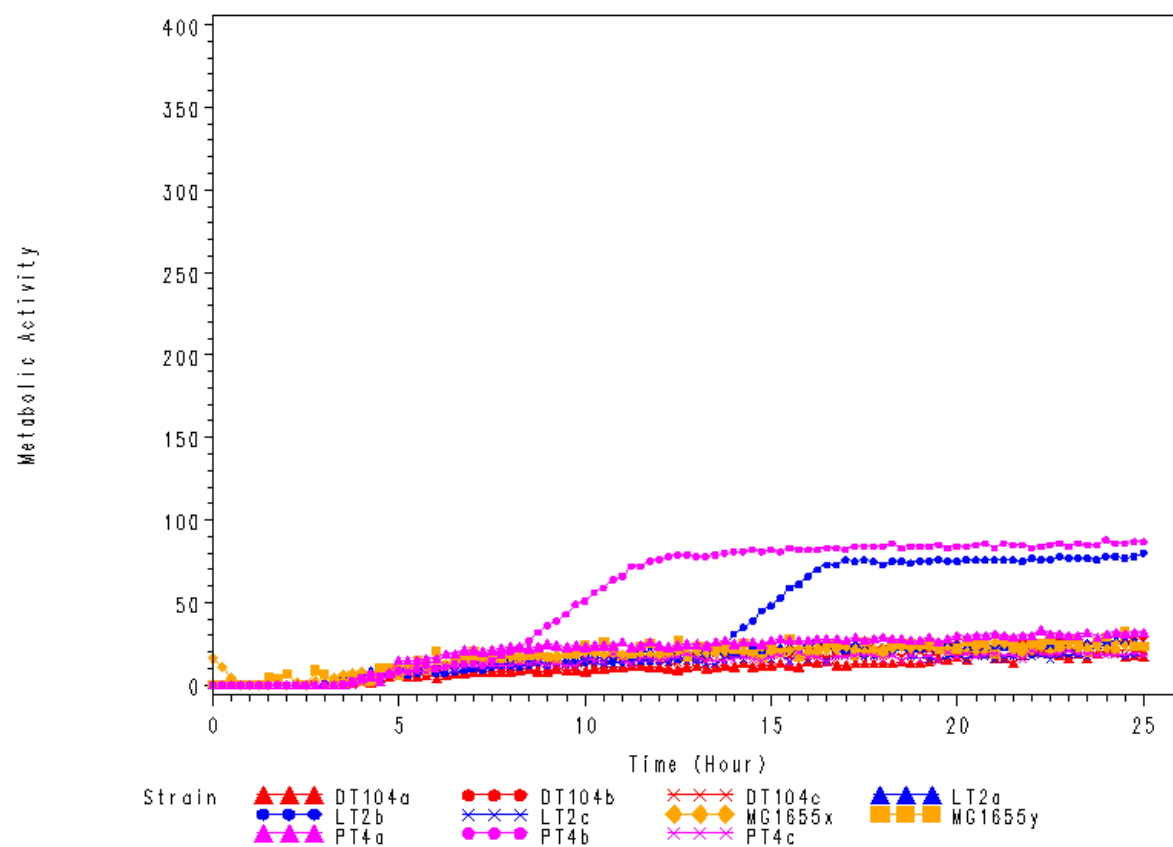

PM02A, H09 (Dihydroxy – Acetone)

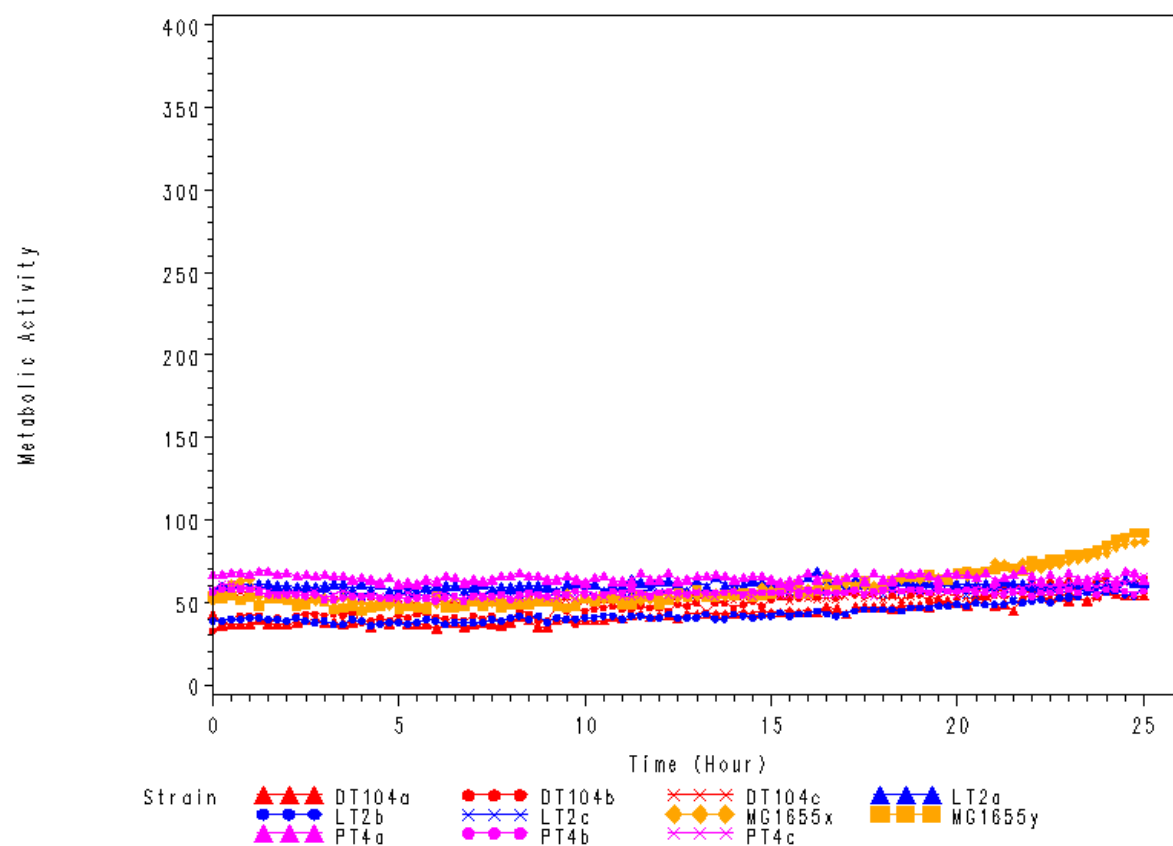

Kinetic Data of Carbon Source Utilisation

PM02A, H10 (2,3-Butanediol)

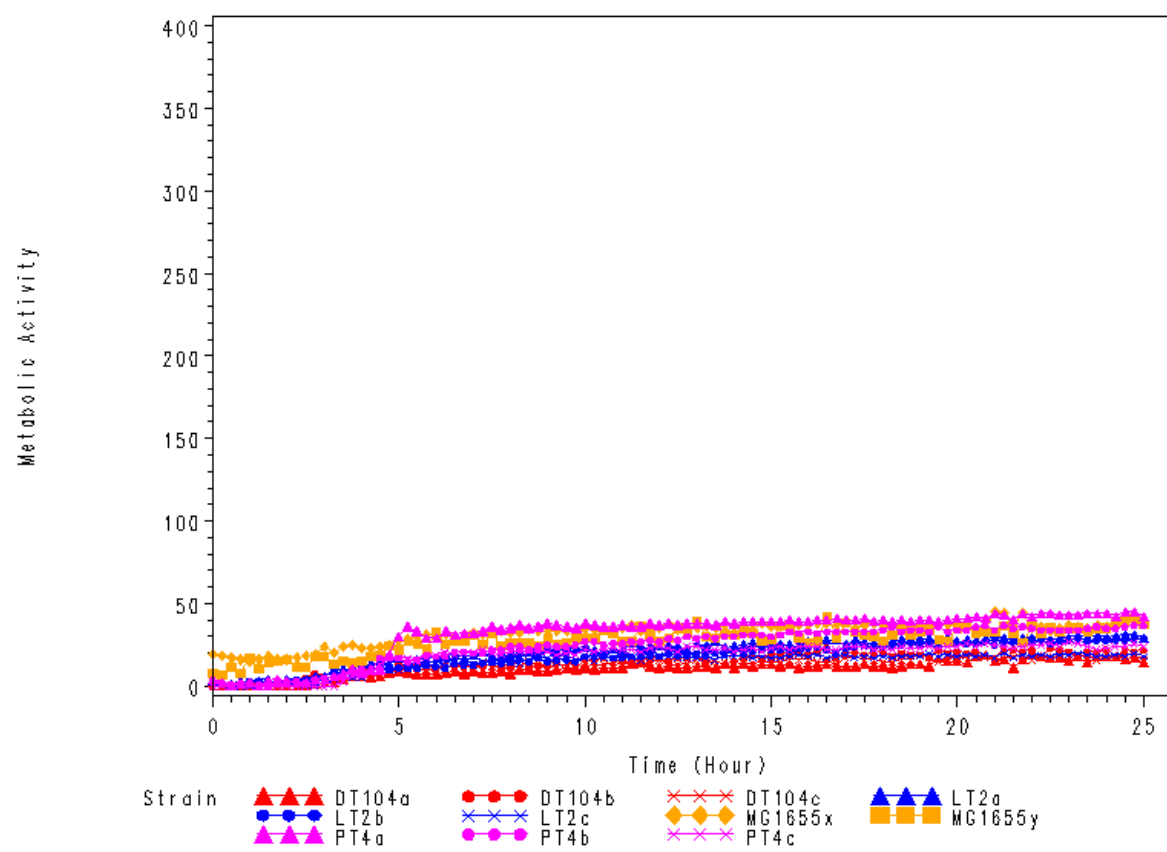

PM02A, H11 (2,3-Butanone)

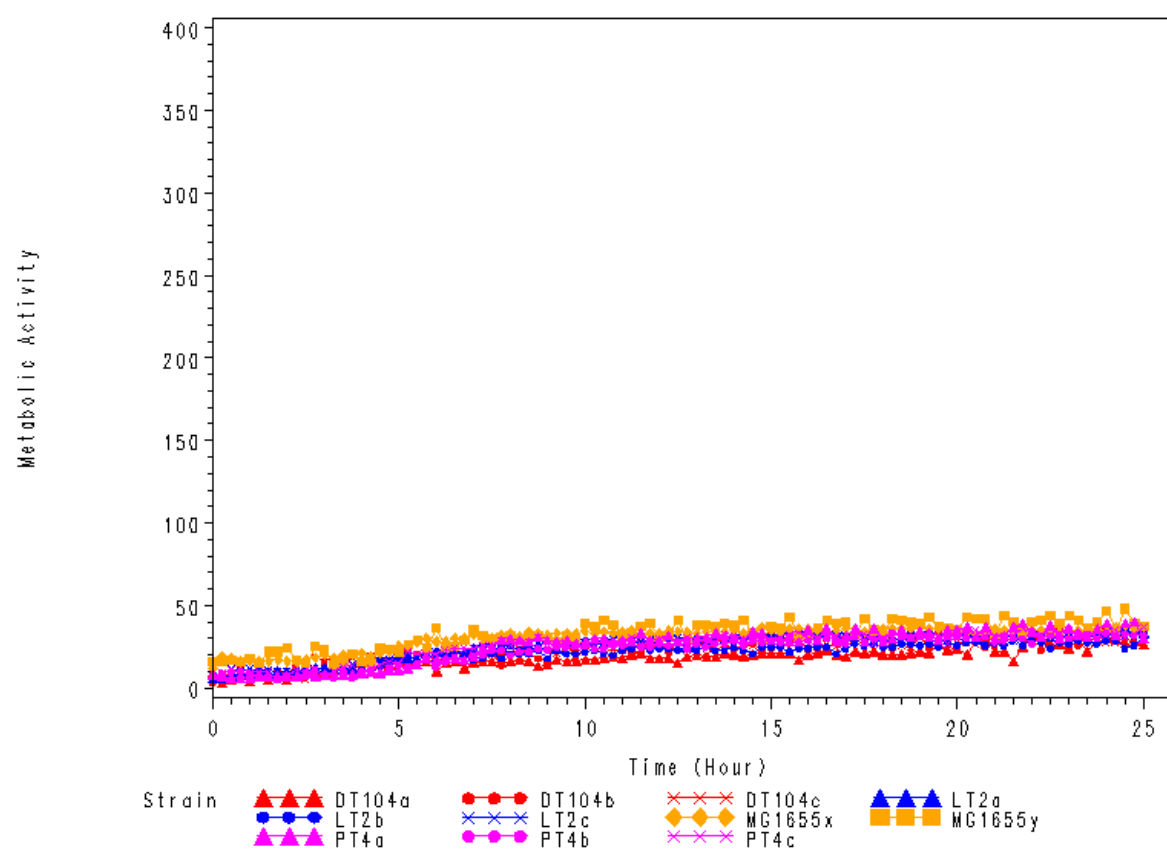

PM02A, H12 (3-Hydroxy-2-Butanone)

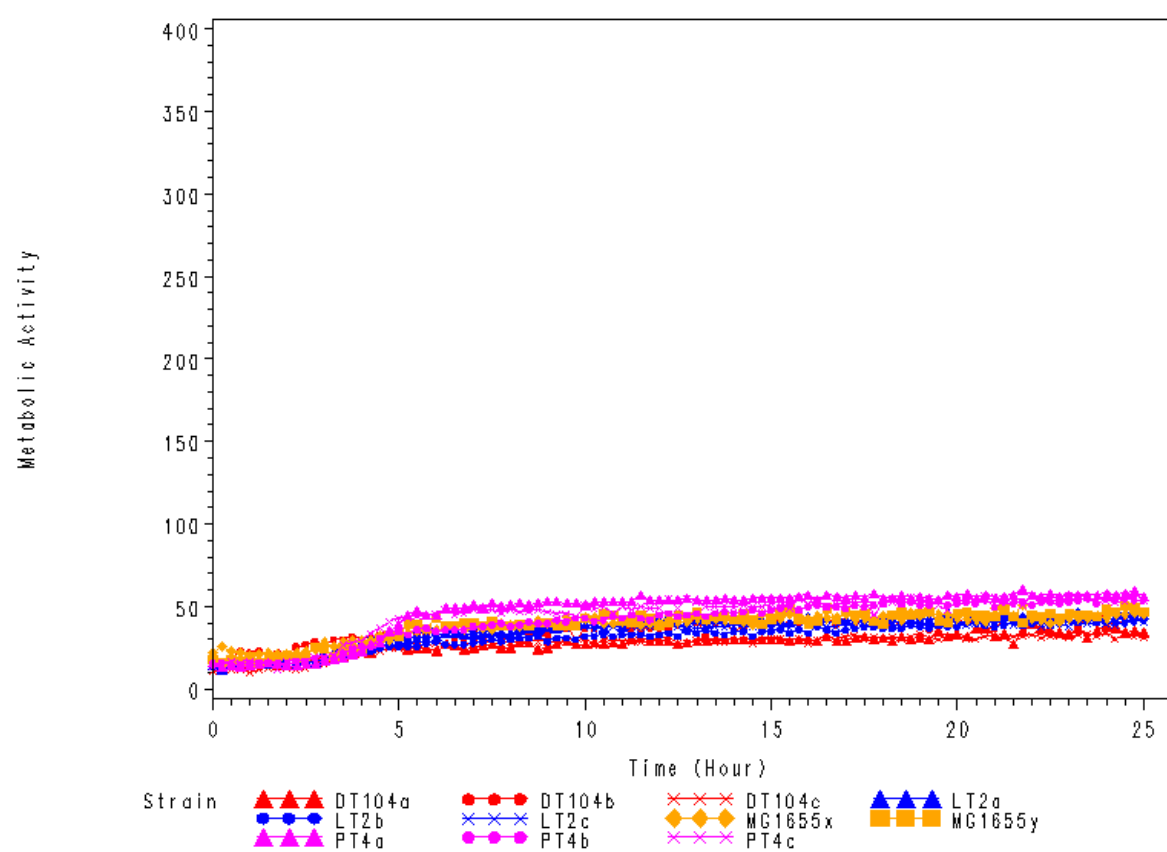

Supplement: supp_M109.005868_jbc.M109.005868-1.pdf [file supp_M109.005868_jbc.M109.005868-1.pdf]
