# Supplementary material
Source: PubMed Central journal article supplement (PMC2785581)

Kinetic Data of Nitrogen Source Utilisation

PM03B, A01 (Negative Control)

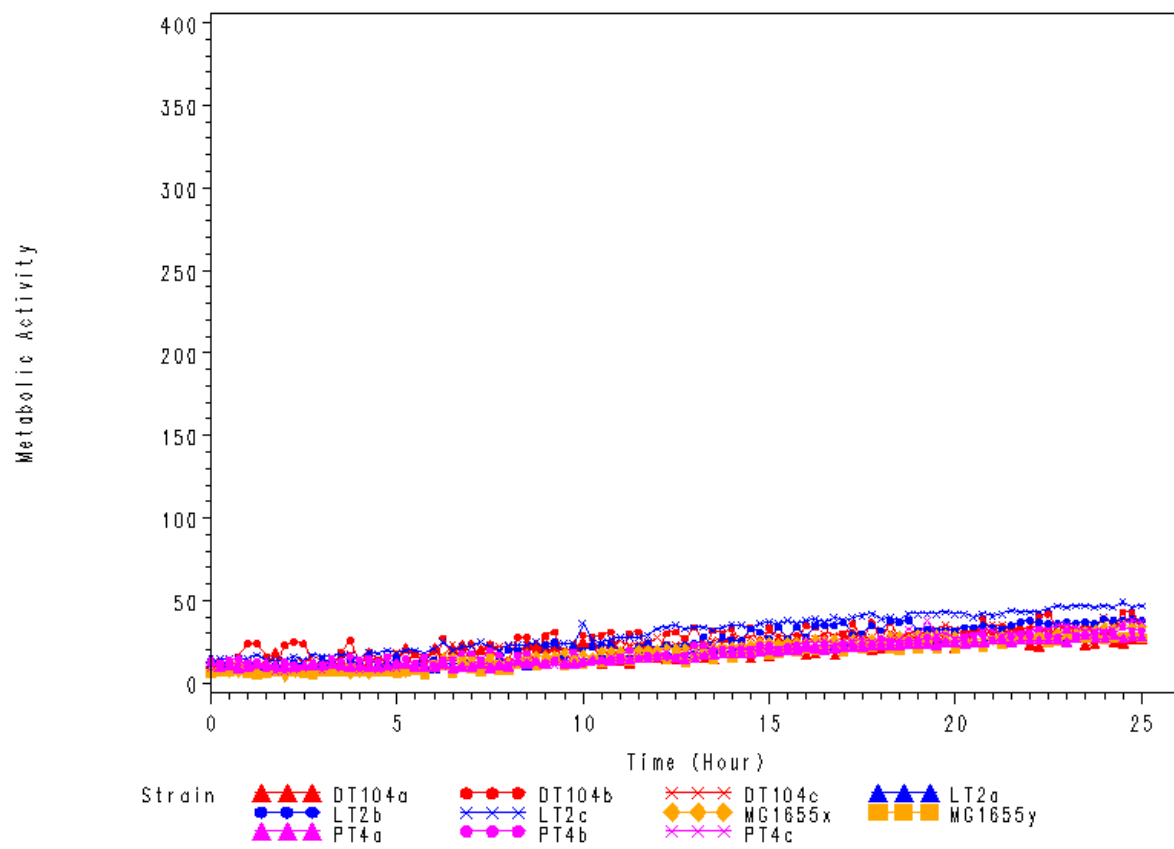

PM03B, A02 (Ammonia)

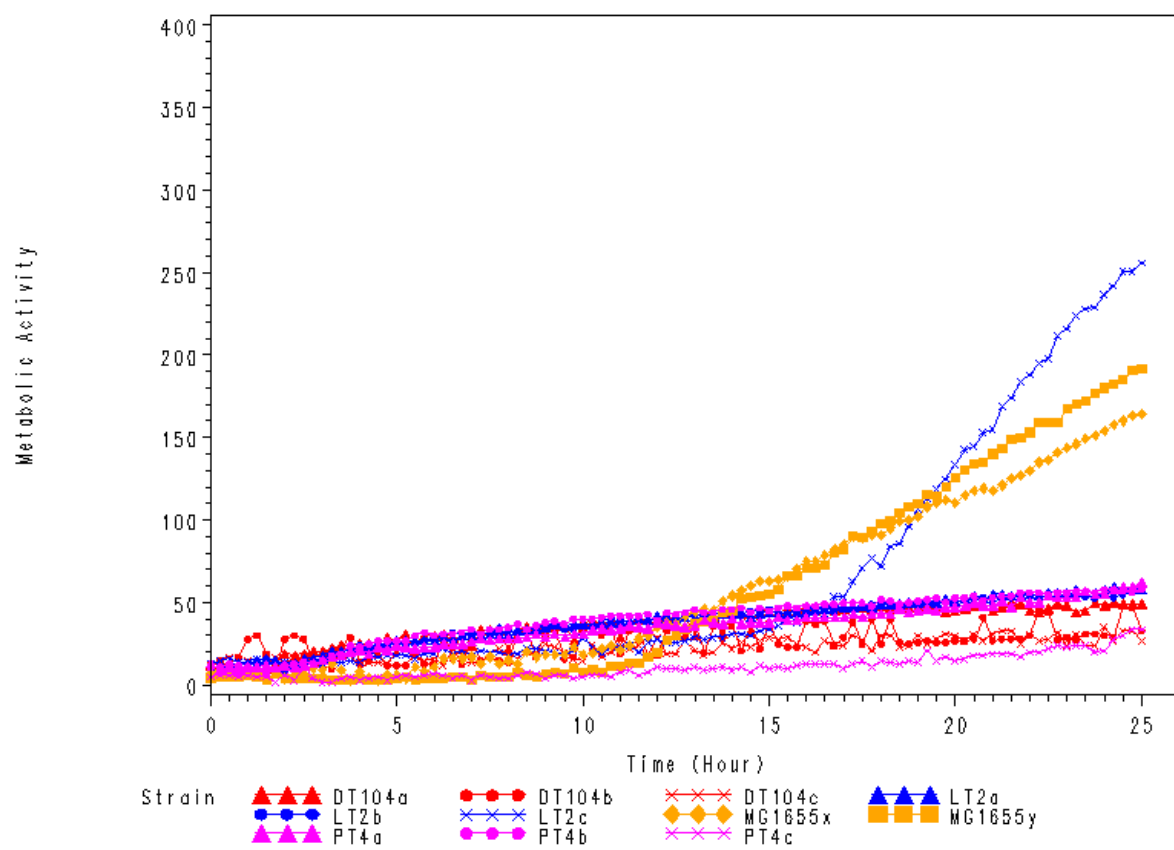

PM03B, A03 (Nitrite)

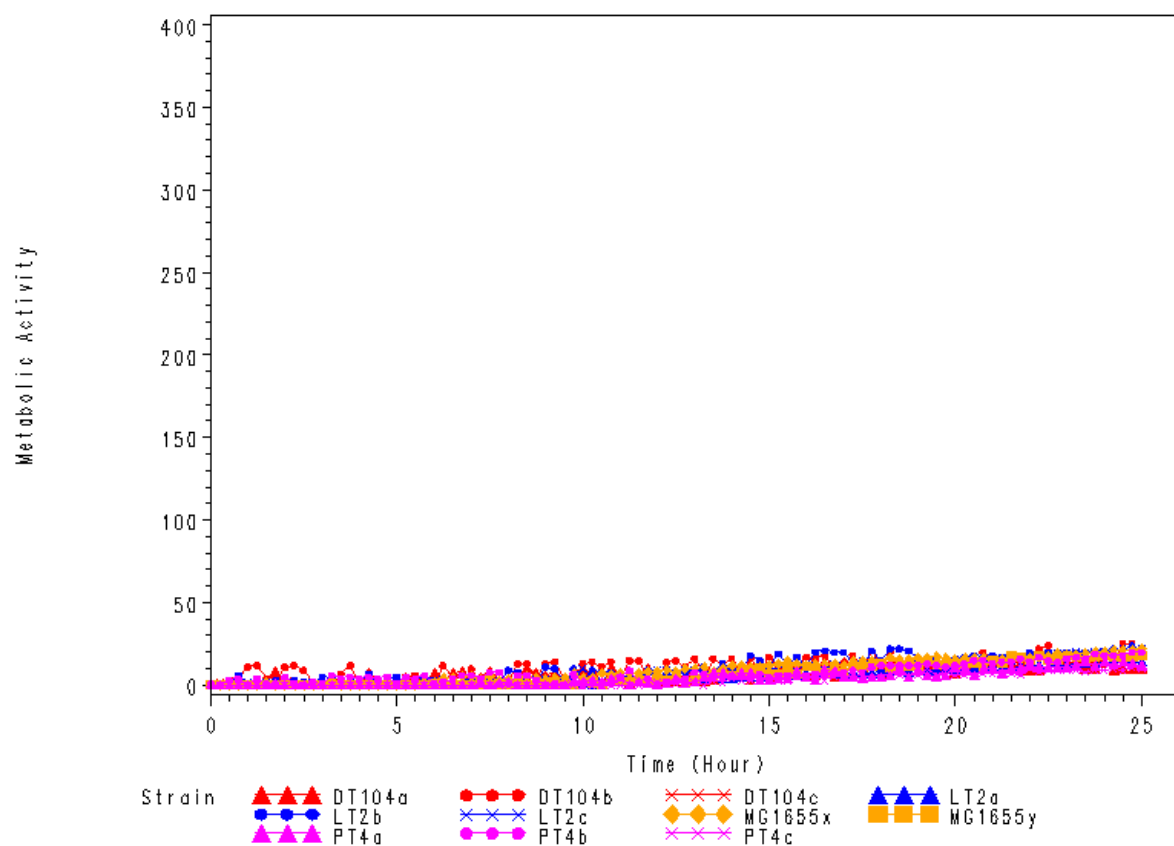

Kinetic Data of Nitrogen Source Utilisation

PM03B, A04 (Nitrate)

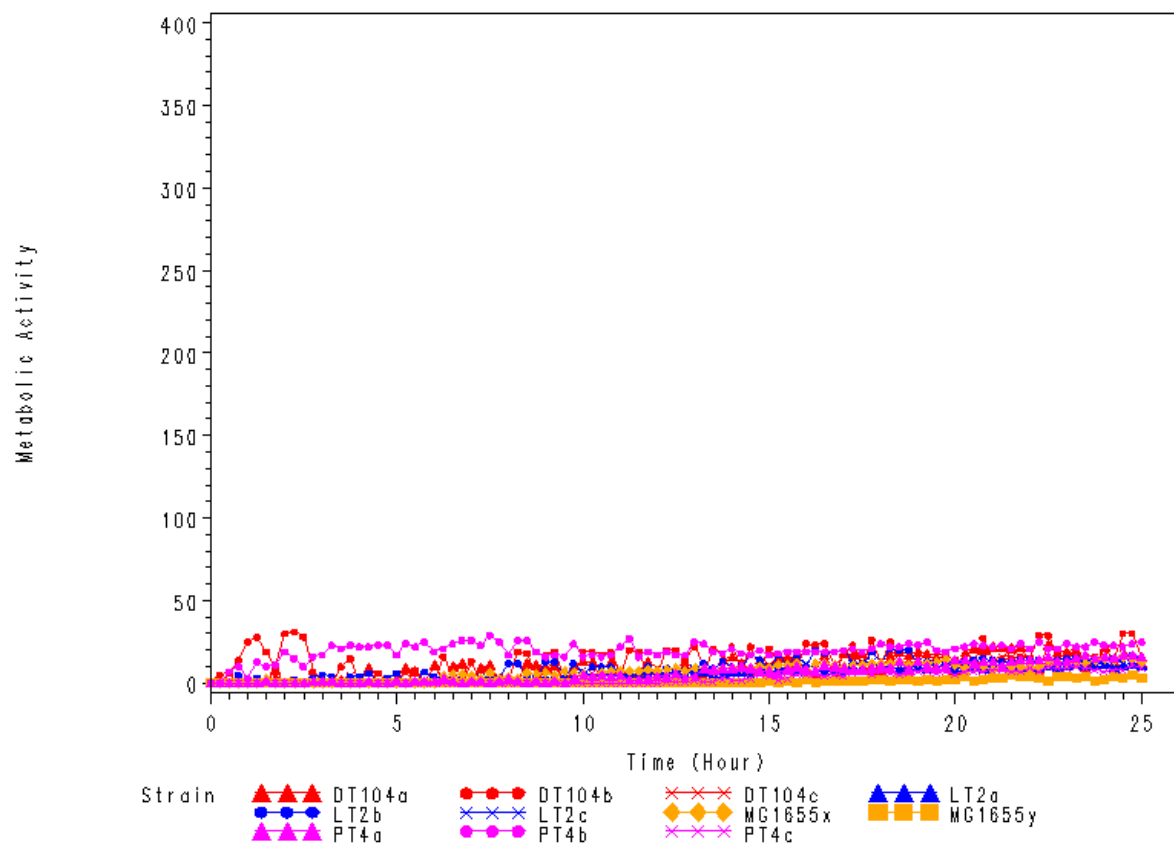

PM03B, A05 (Urea)

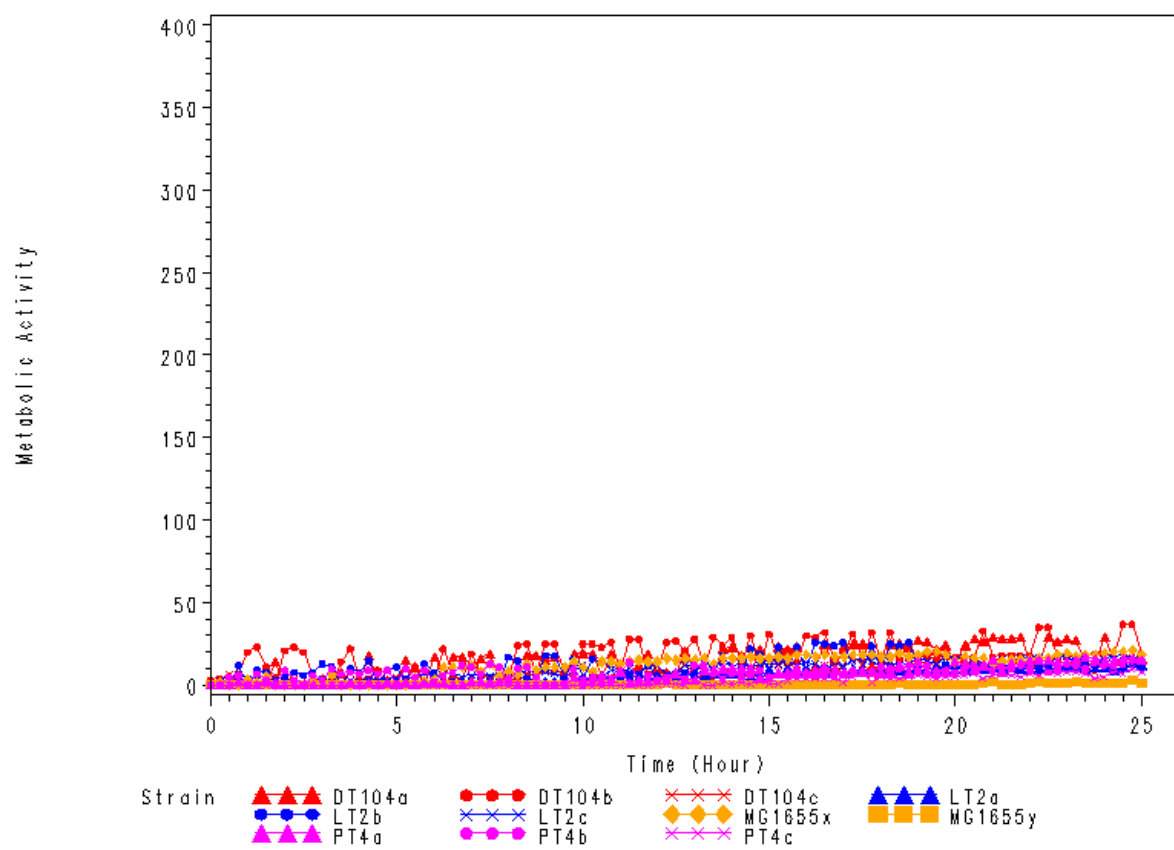

PM03B, A06 (Biuret)

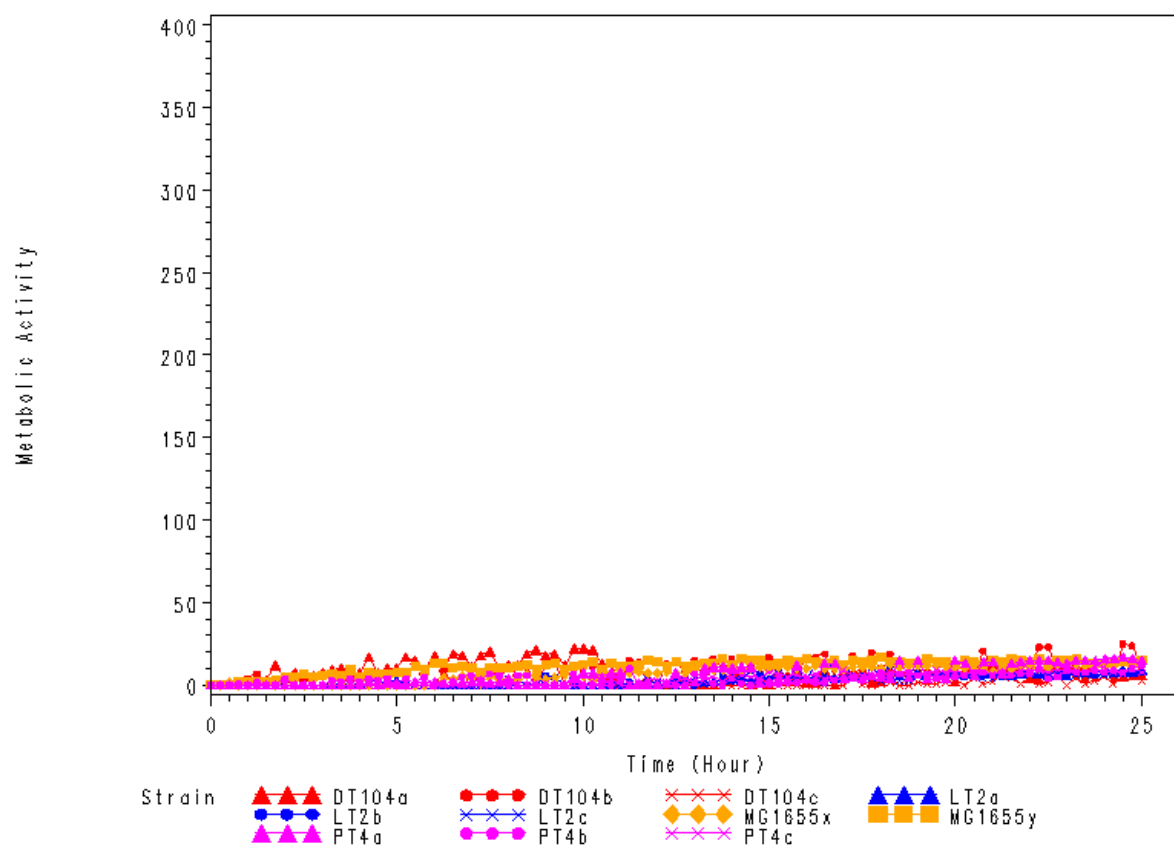

Kinetic Data of Nitrogen Source Utilisation

PM03B, A07 (L-Alanine)

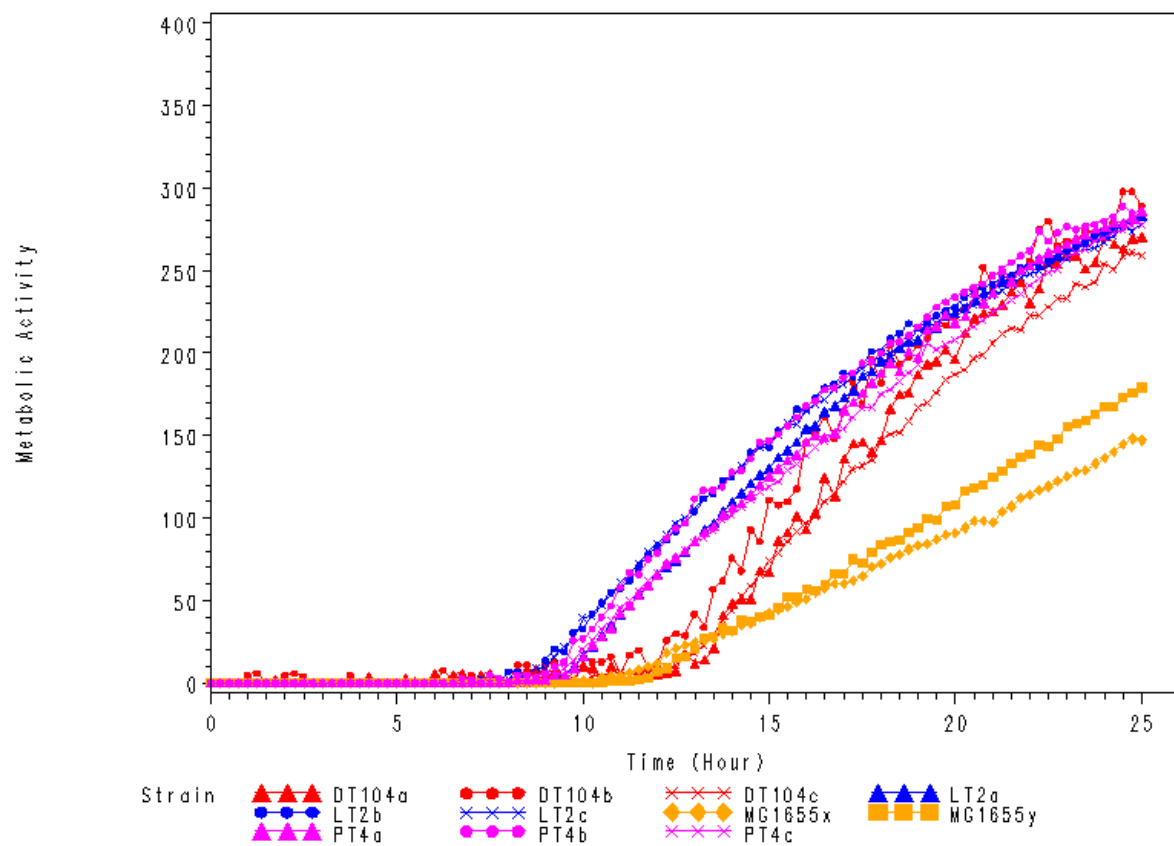

PM03B, A08 (L-Arginine)

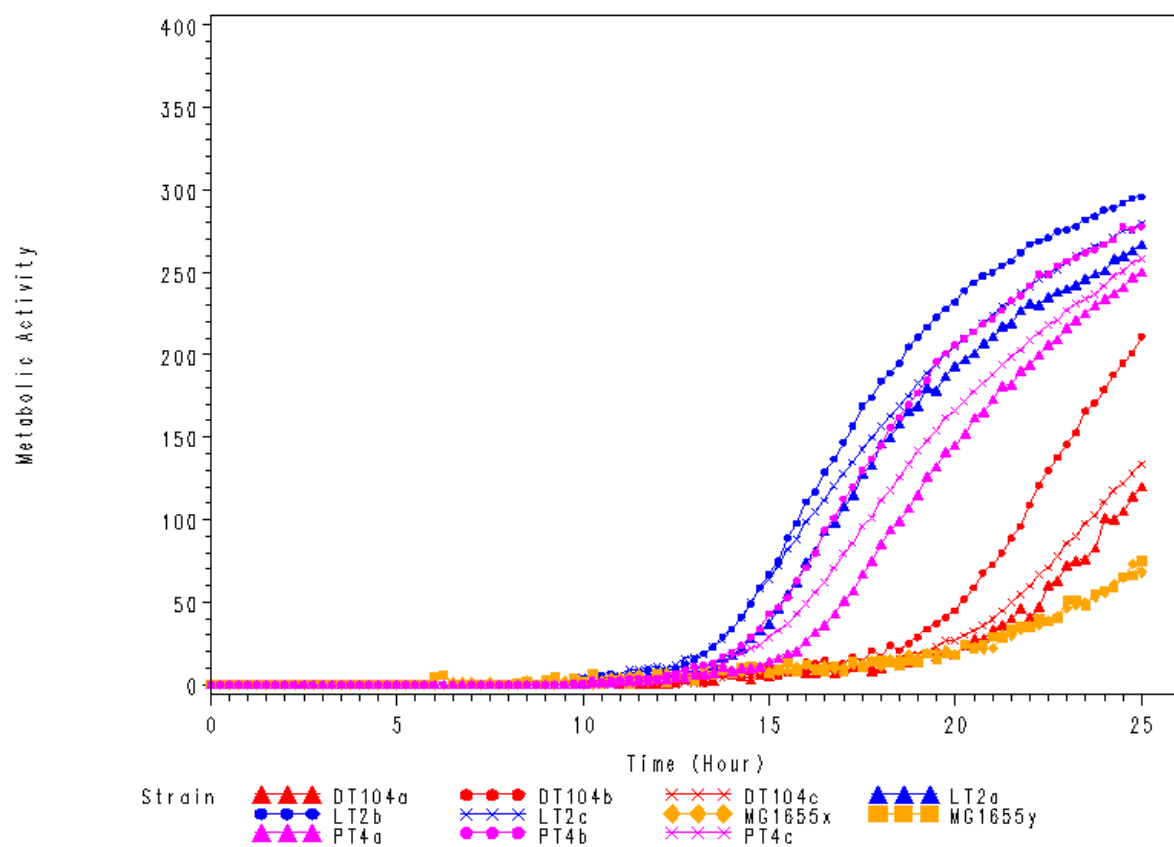

PM03B, A09 (L-Asparagine)

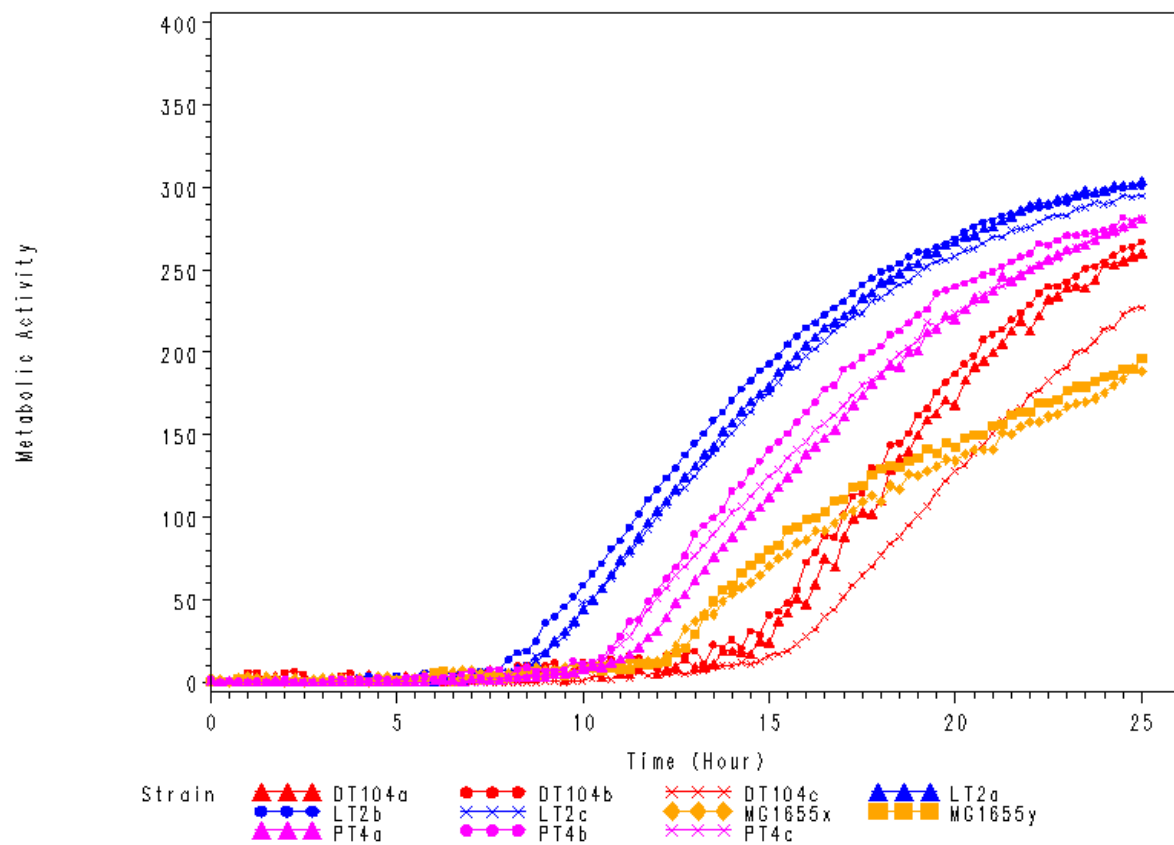

Kinetic Data of Nitrogen Source Utilisation

PM03B, A10 (L-Aspartic Acid)

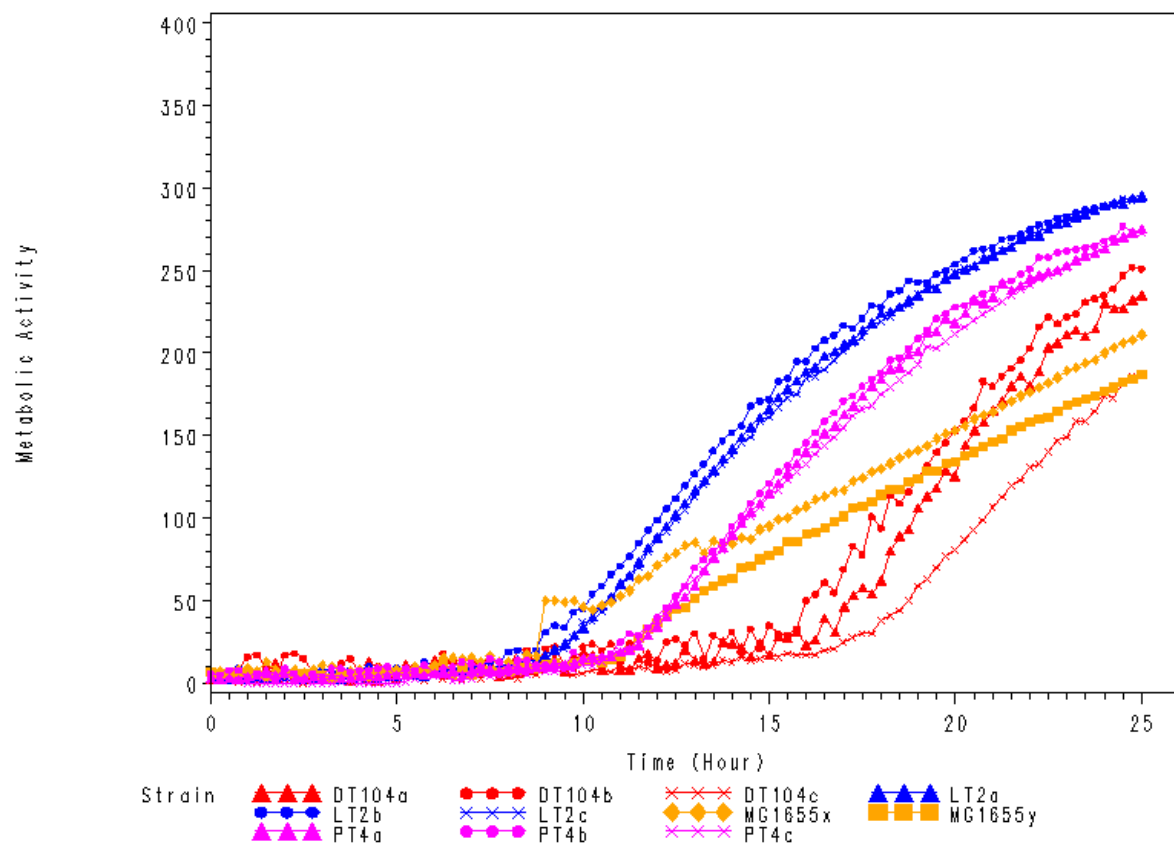

PM03B, A11 (L-Cysteine)

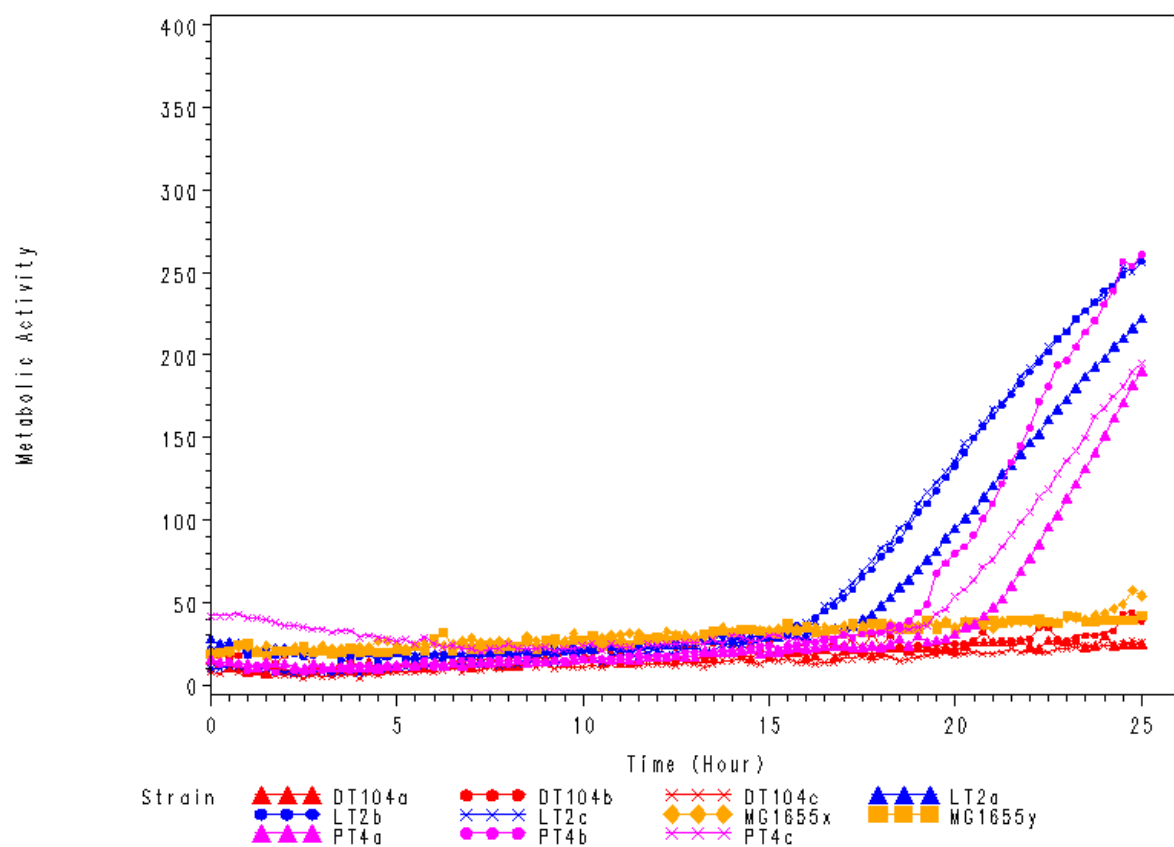

PM03B, A12 (L-Glutamic Acid)

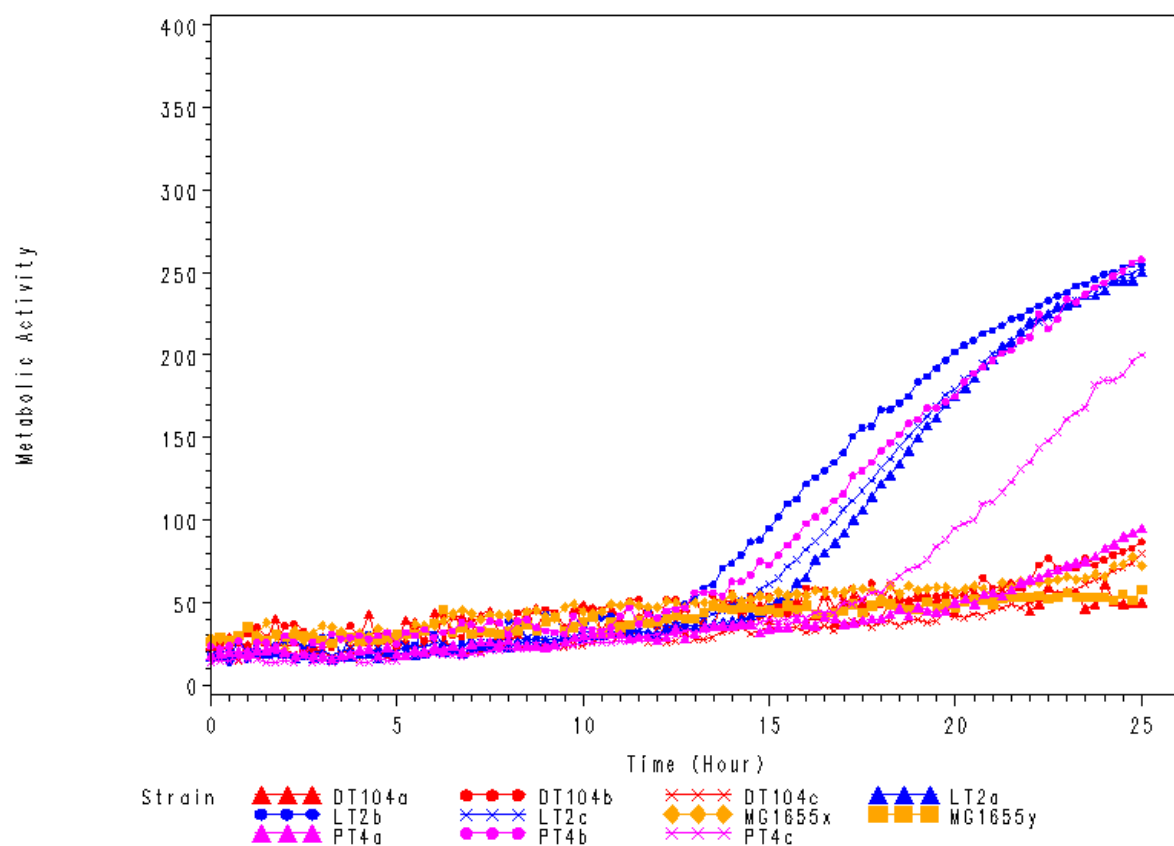

Kinetic Data of Nitrogen Source Utilisation

PM03B, B01 (L-Glutamine)

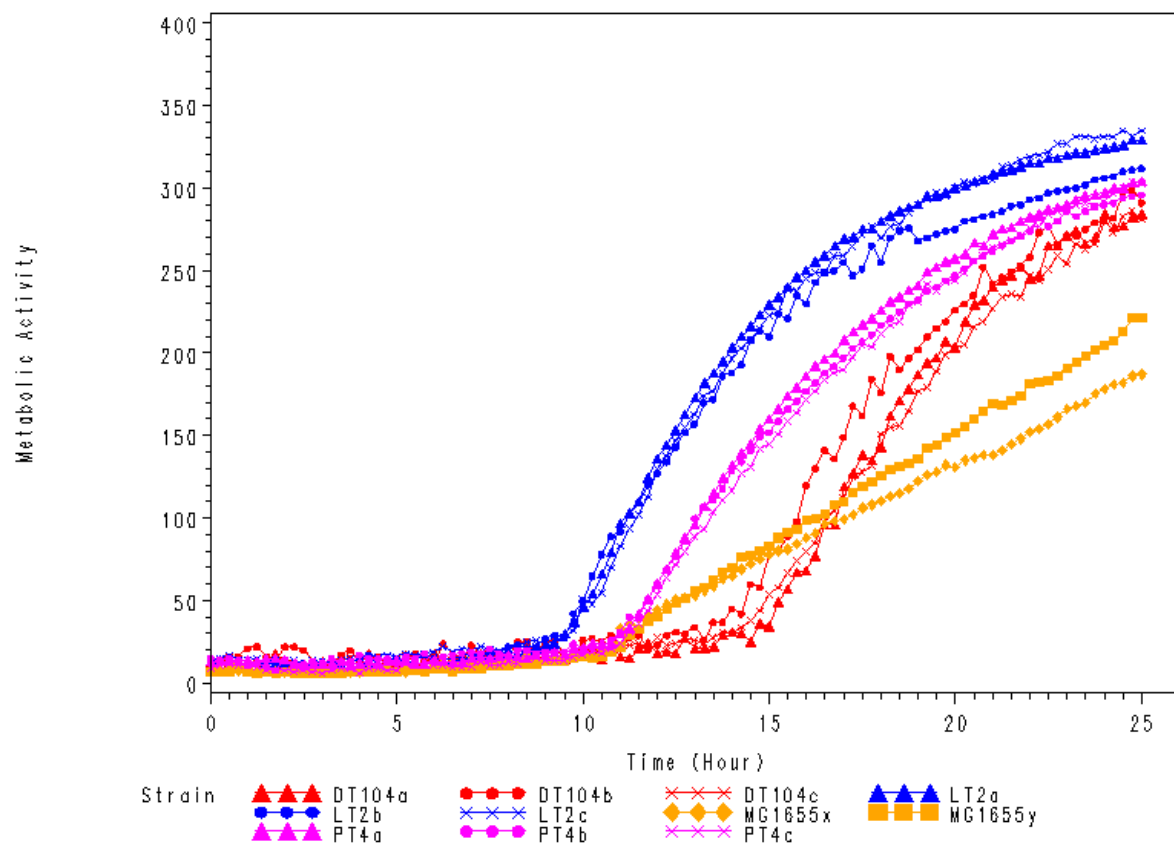

PM03B, B02 (Glycine)

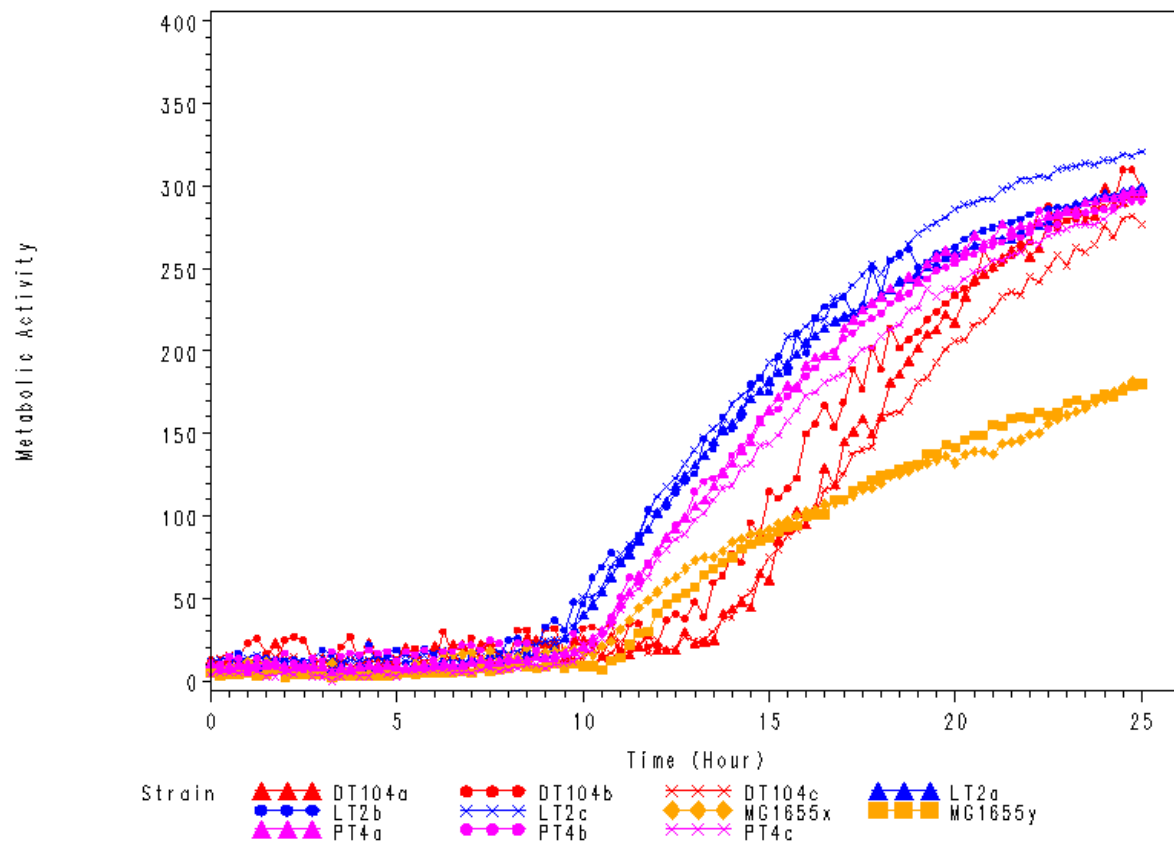

PM03B, B03 (L-Histidine)

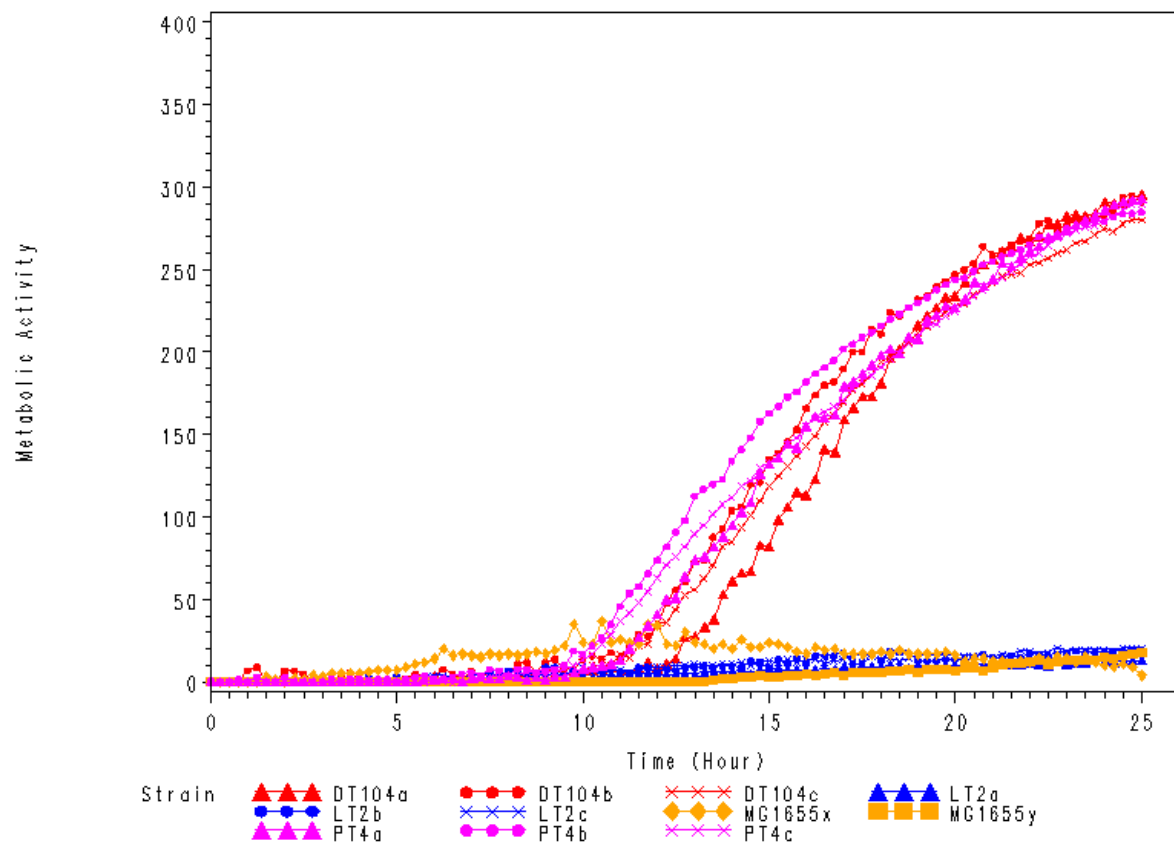

Kinetic Data of Nitrogen Source Utilisation

PM03B, B04 (L-Isoleucine)

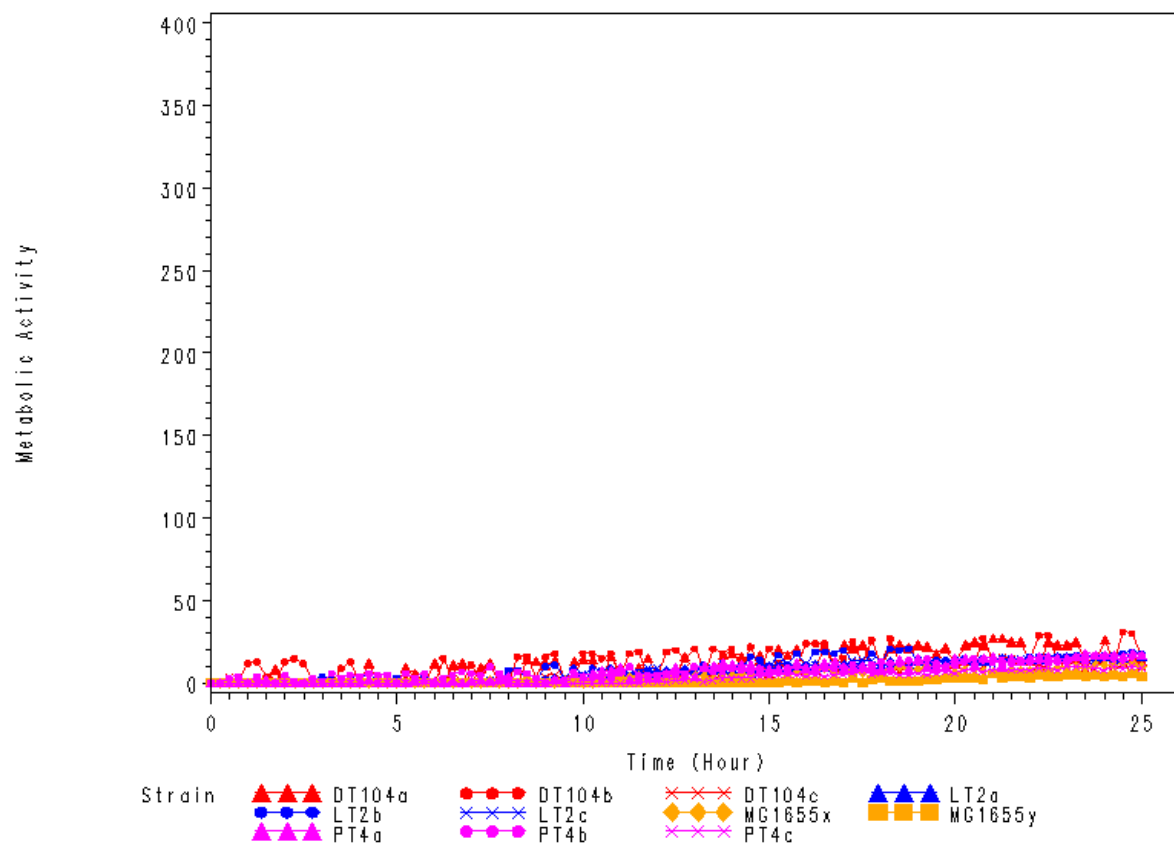

PM03B, B05 (L-Leucine)

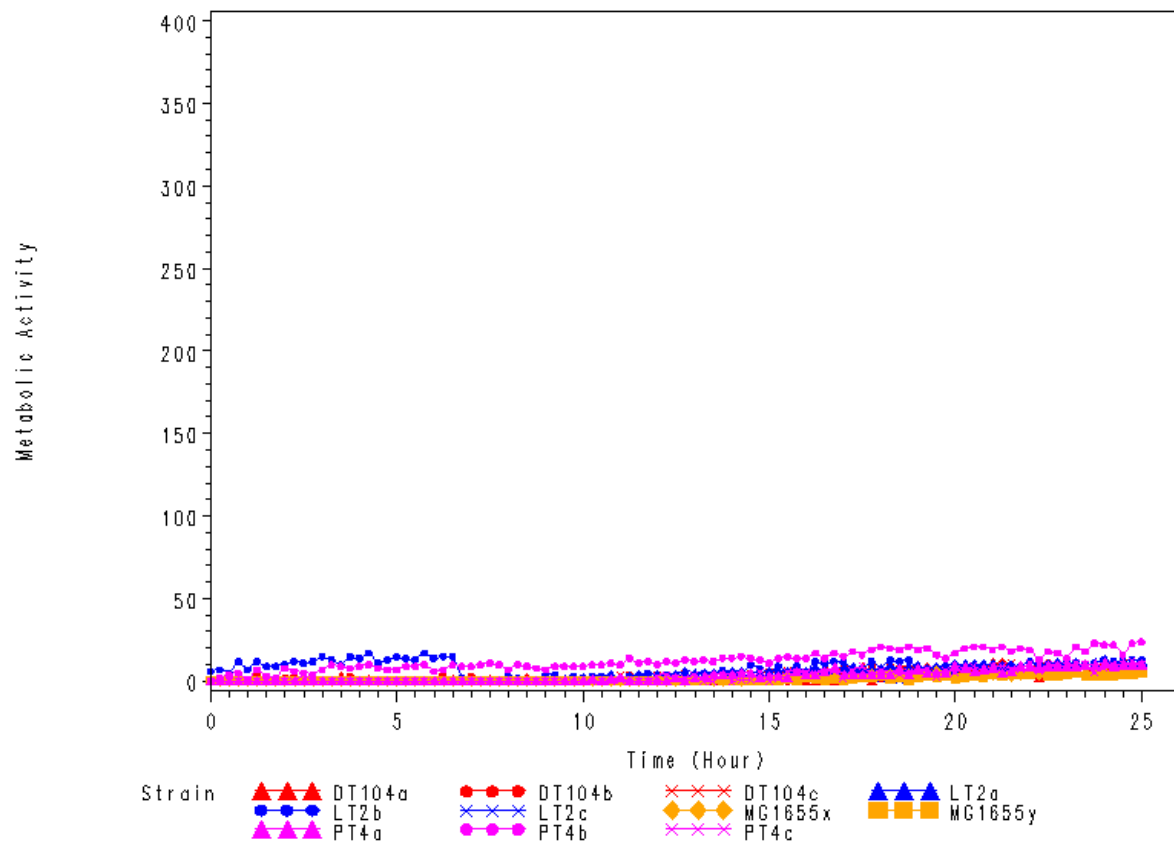

PM03B, B06 (L-Lysine)

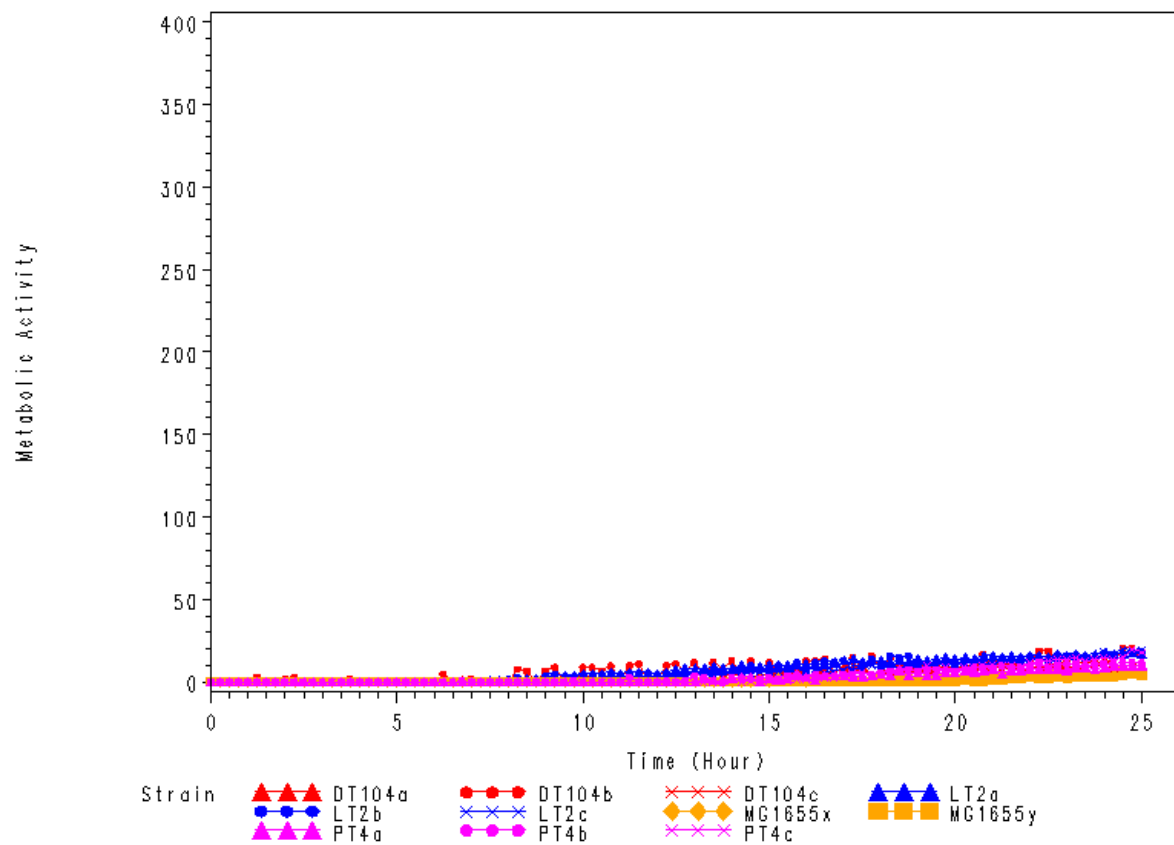

Kinetic Data of Nitrogen Source Utilisation

PM03B, B07 (L-Methionine)

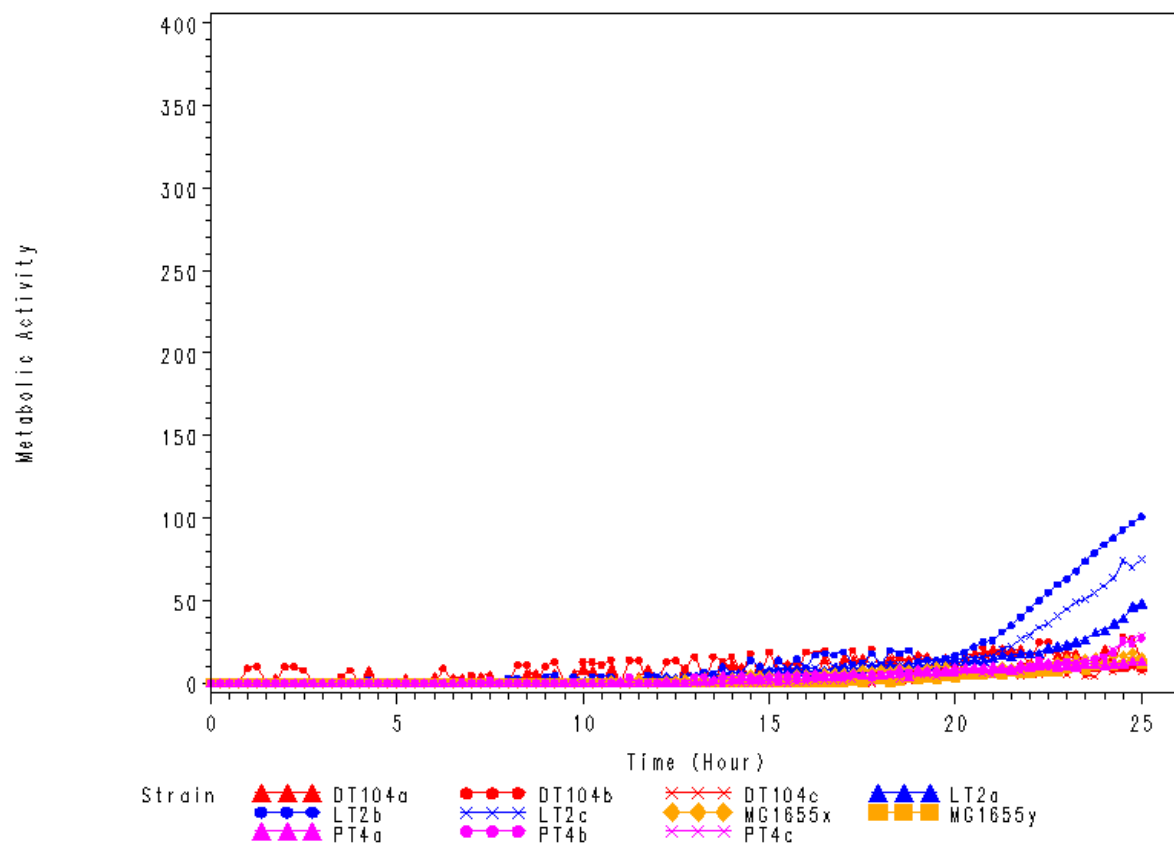

PM03B, B08 (L-Phenylalanine)

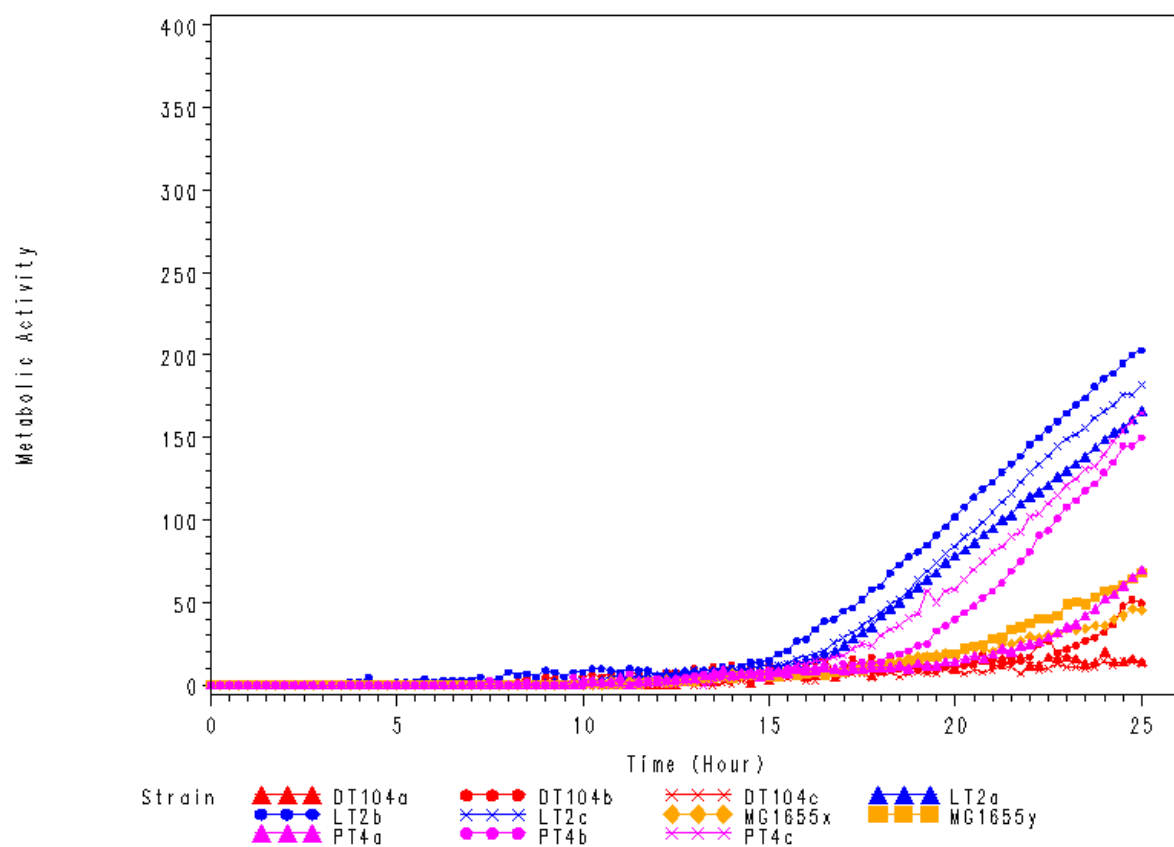

PM03B, B09 (L-Proline)

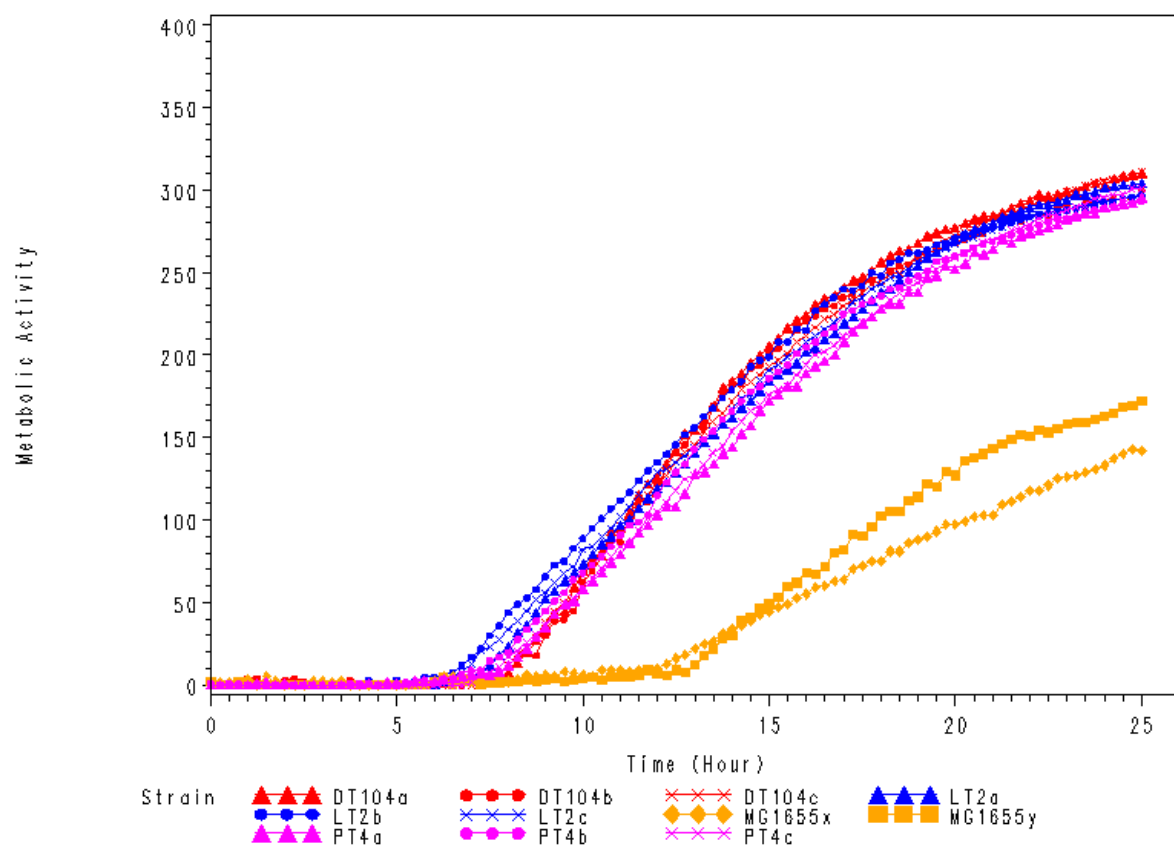

Kinetic Data of Nitrogen Source Utilisation

PM03B, B10 (L-Serine)

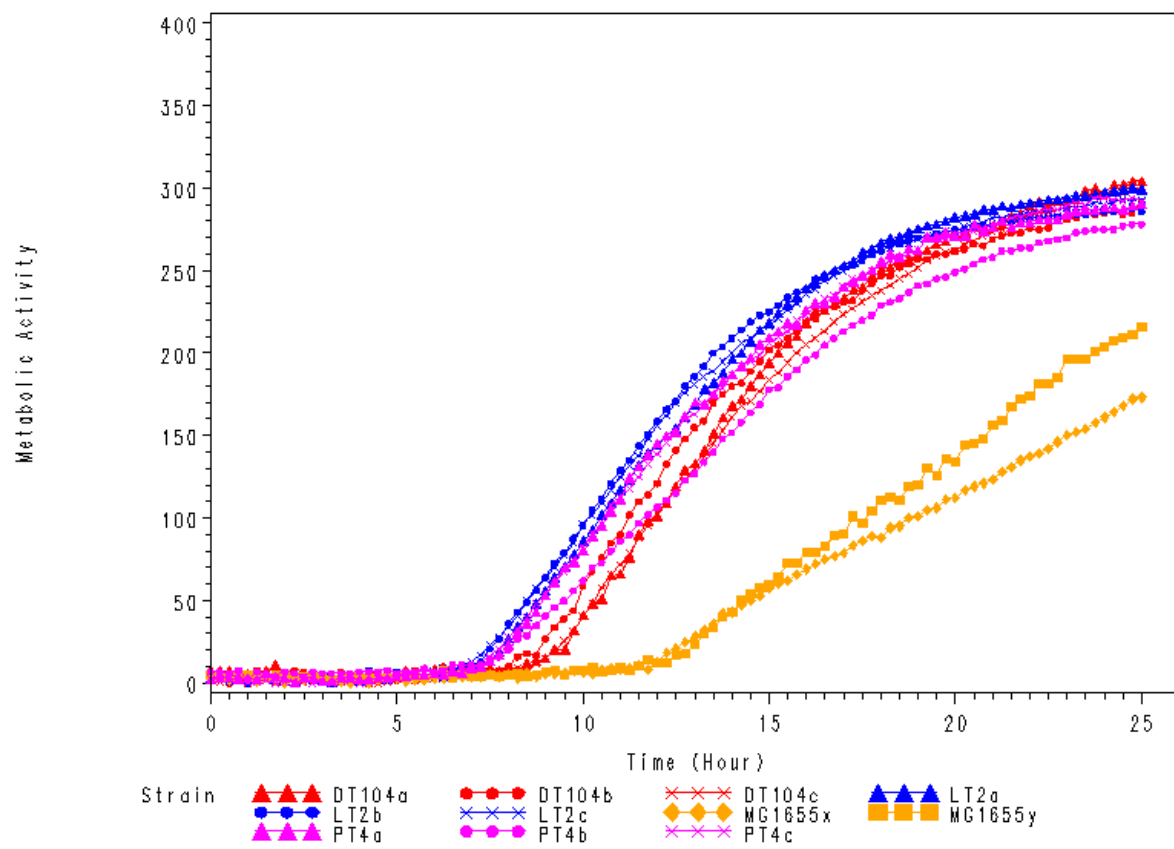

PM03B, B11 (L-Threonine)

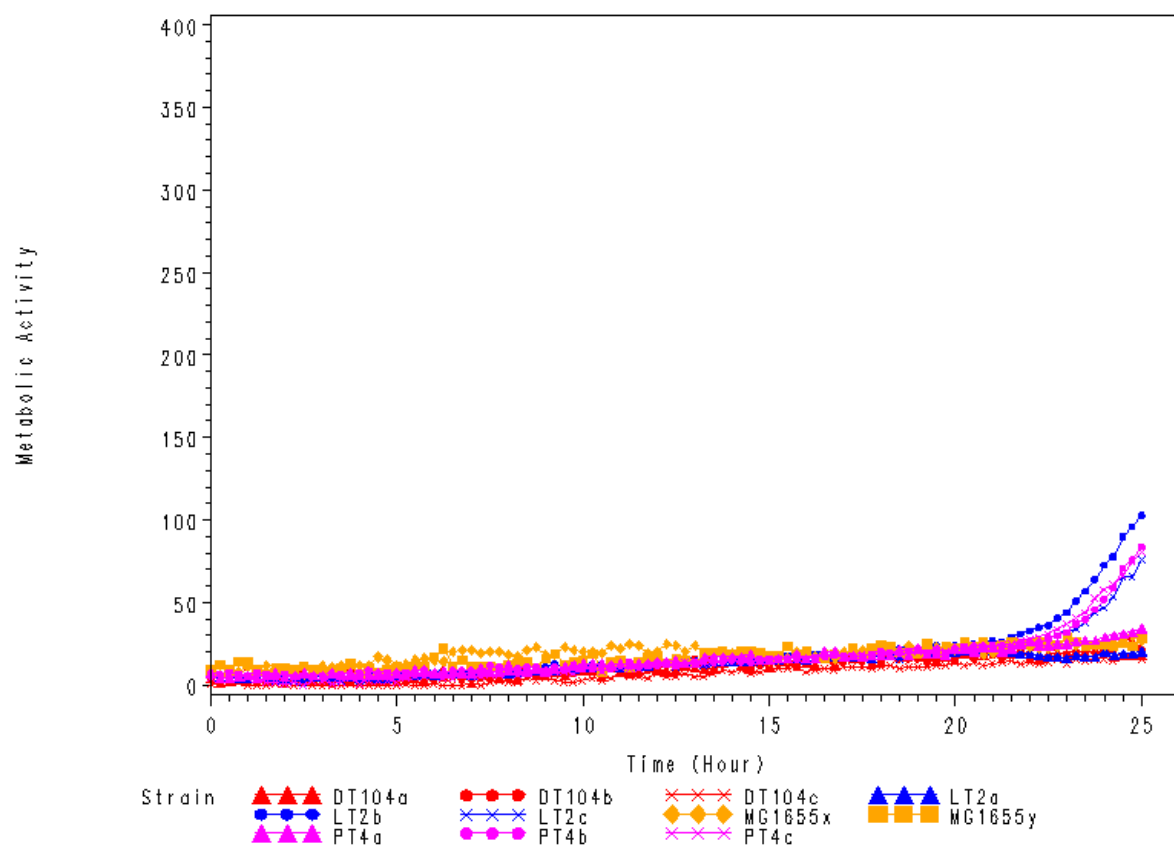

PM03B, B12 (L-Tryptophan)

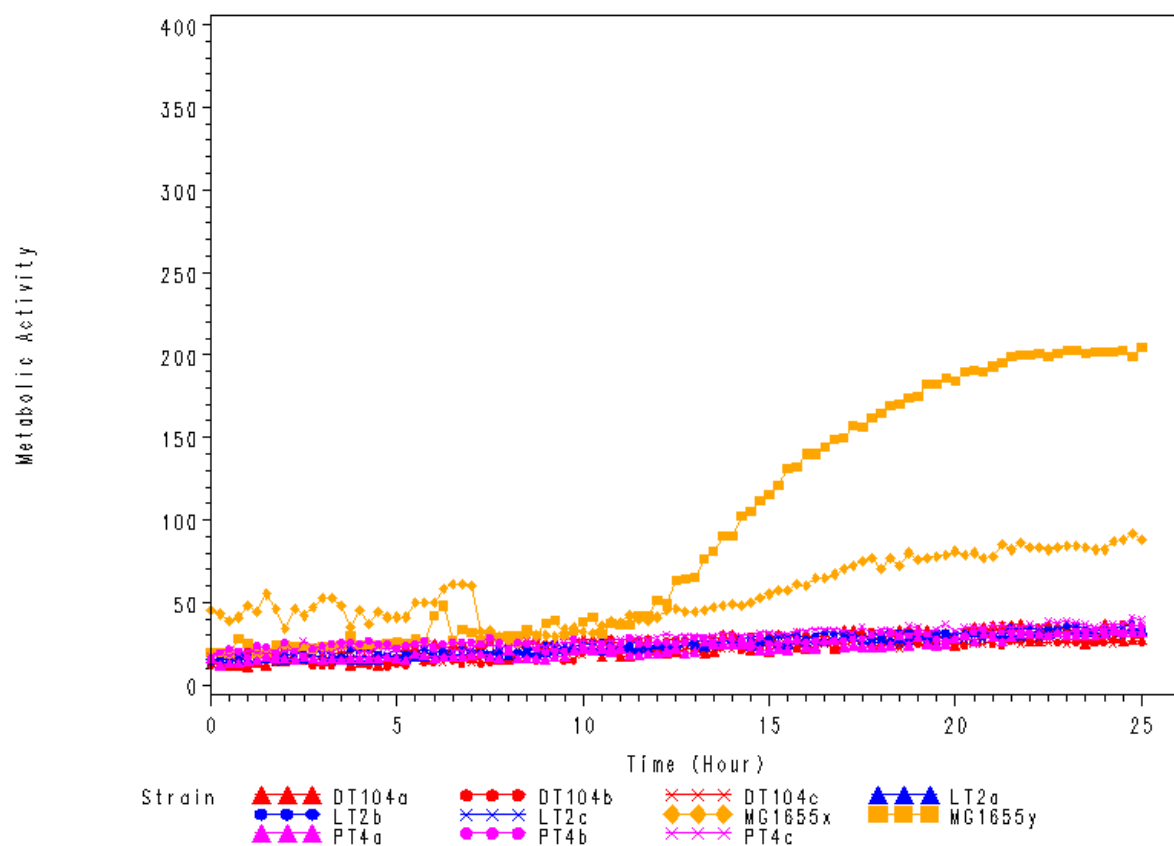



Kinetic Data of Nitrogen Source Utilisation

PM03B, C01 (L-Tyrosine)

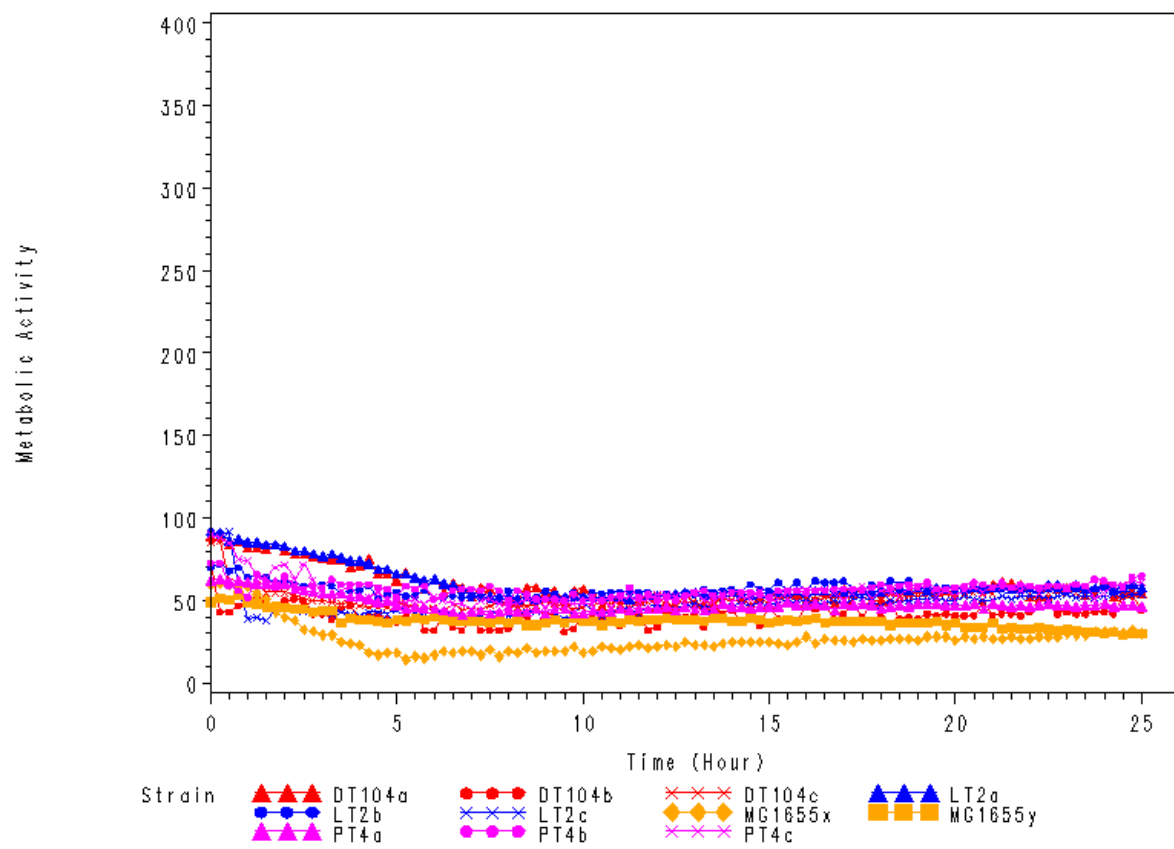

PM03B, C02 (L-Valine)

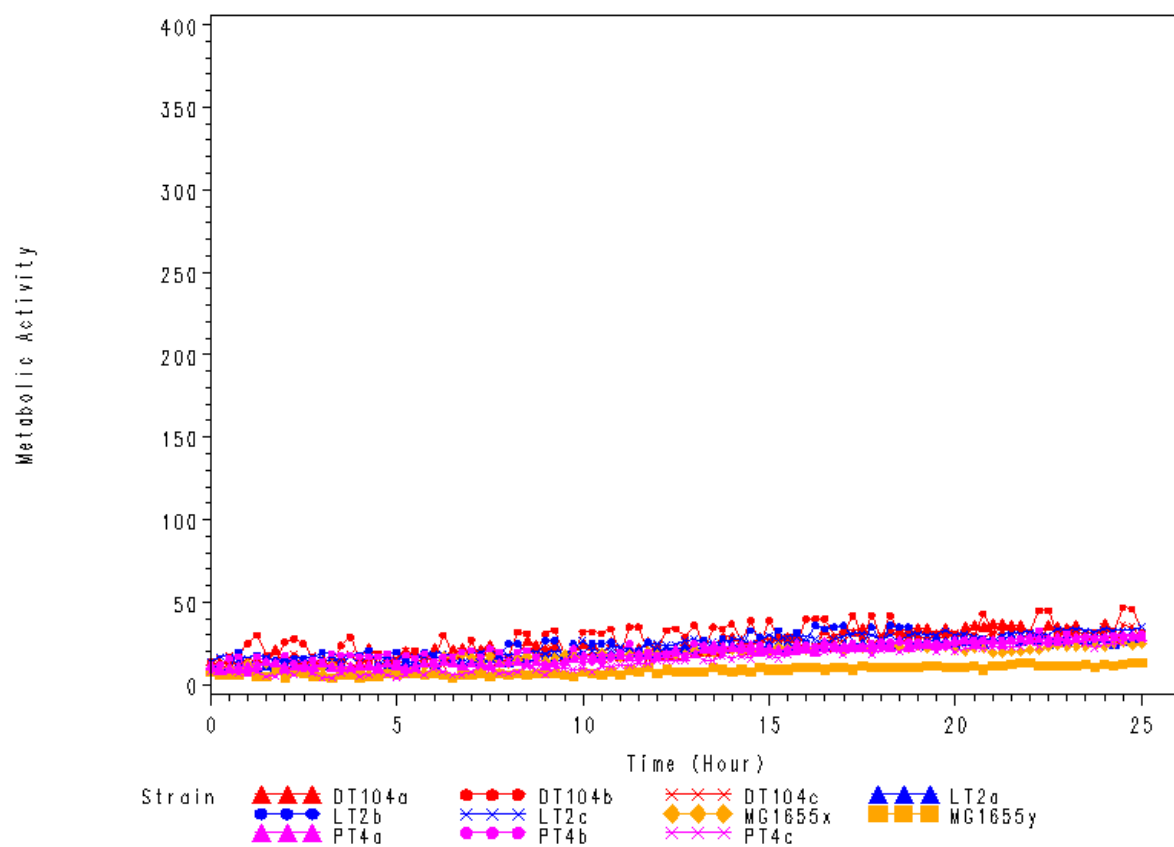

PM03B, C03 (D-Alanine)

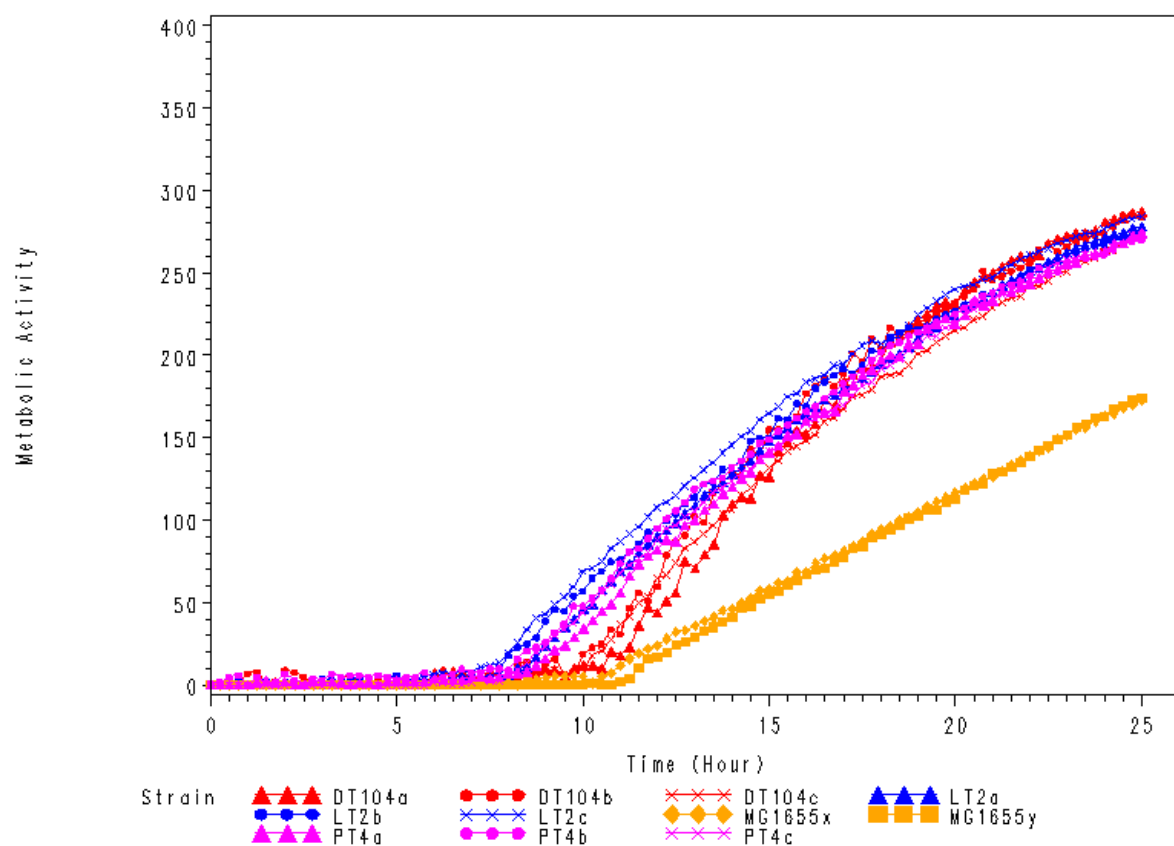

Kinetic Data of Nitrogen Source Utilisation

PM03B, C04 (D-Asparagine)

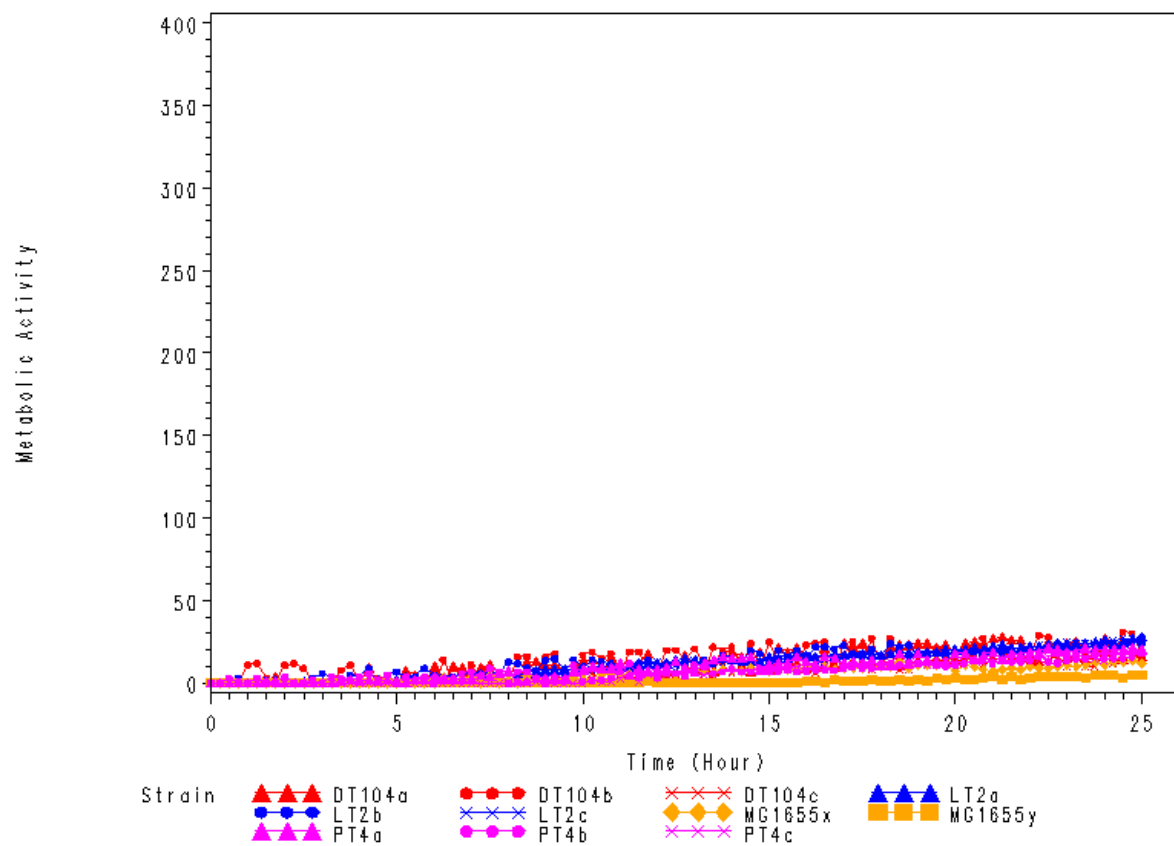

PM03B, C05 (D-Aspartic Acid)

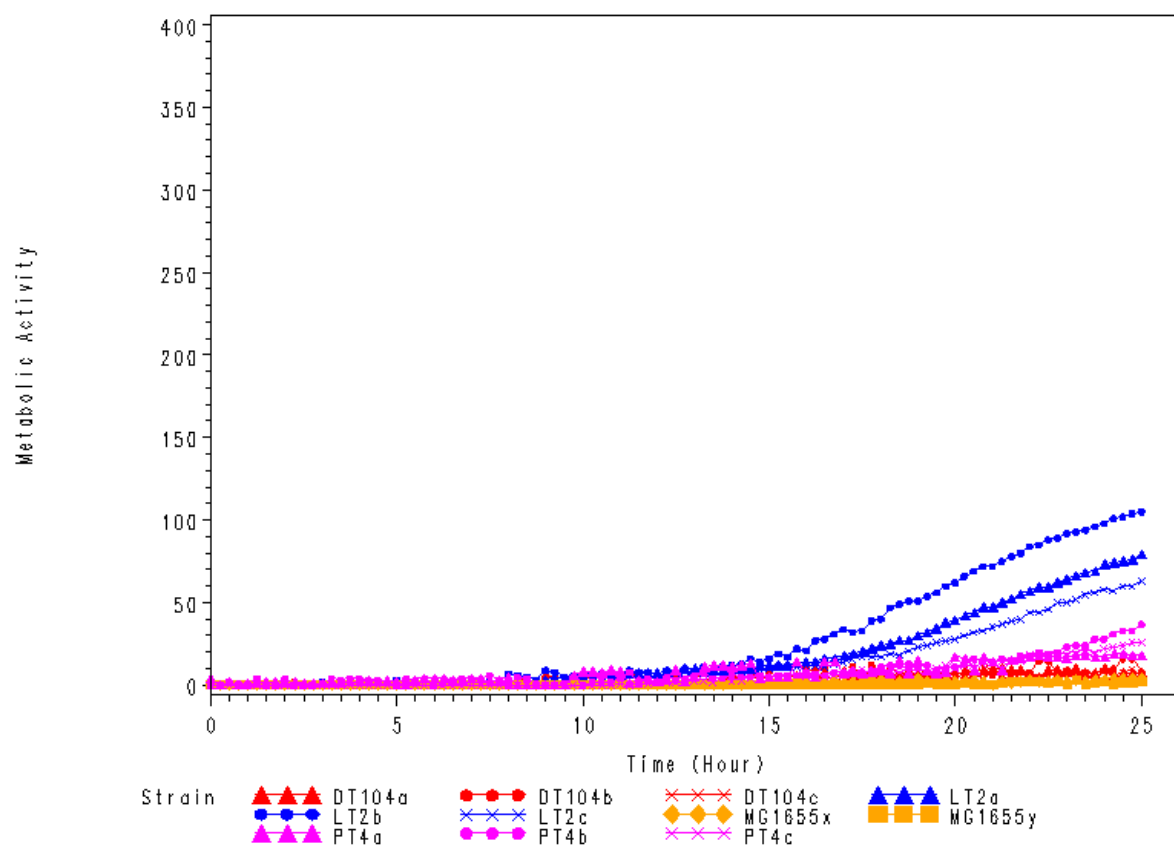

PM03B, C06 (D-Glutamic Acid)

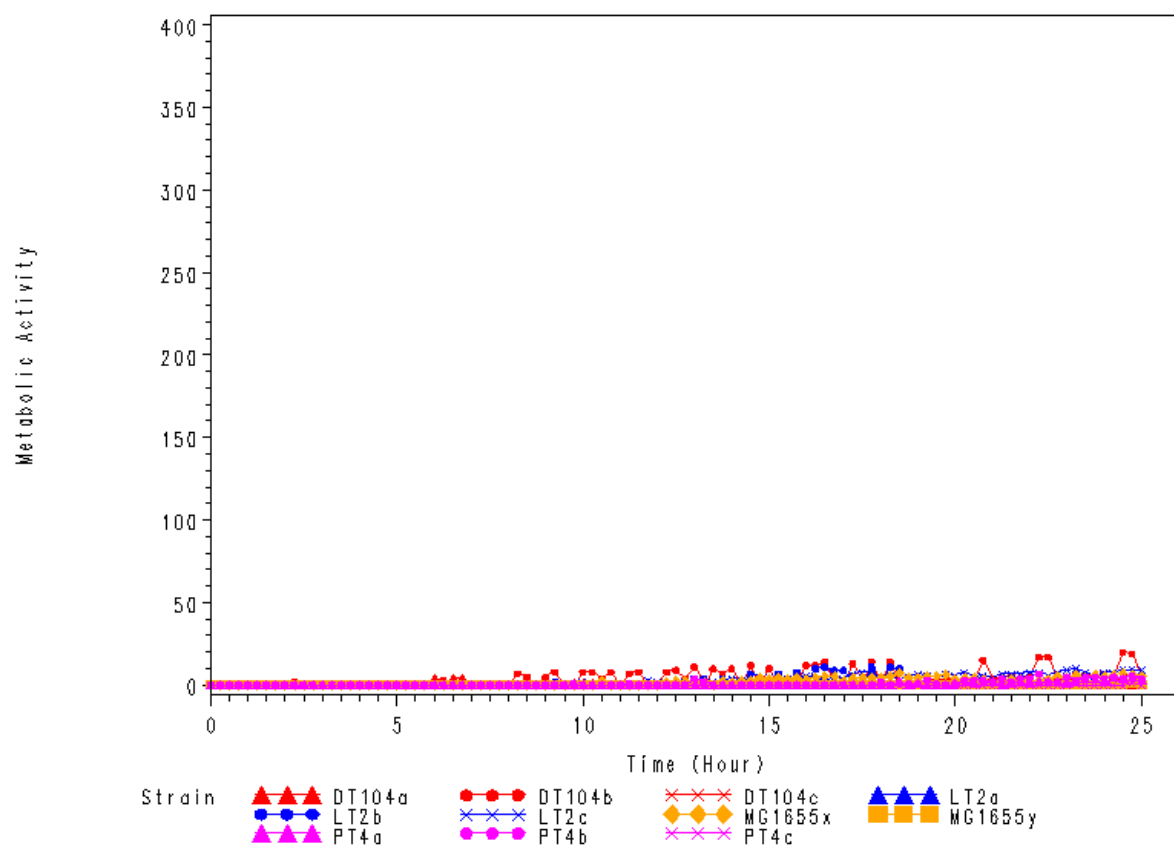

Kinetic Data of Nitrogen Source Utilisation

PM03B, C07 (D-Lysine)

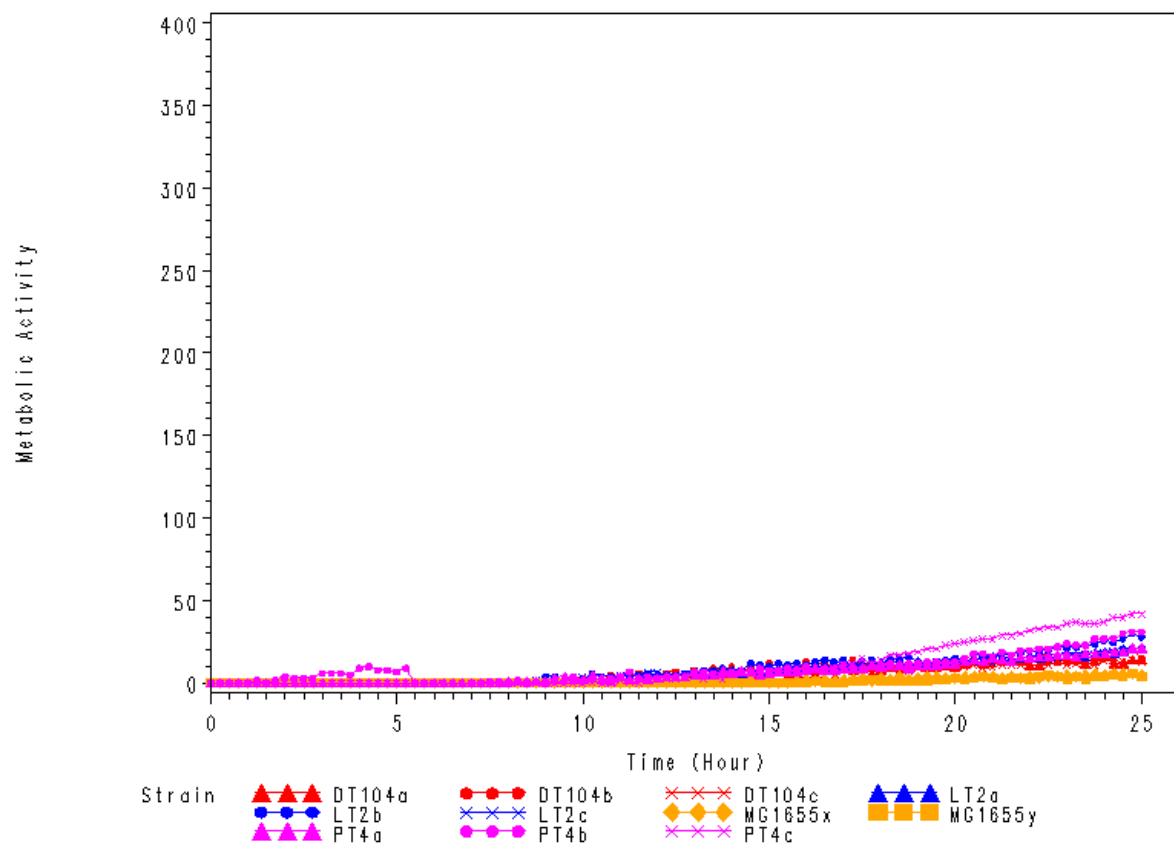

PM03B, C08 (D-Serine)

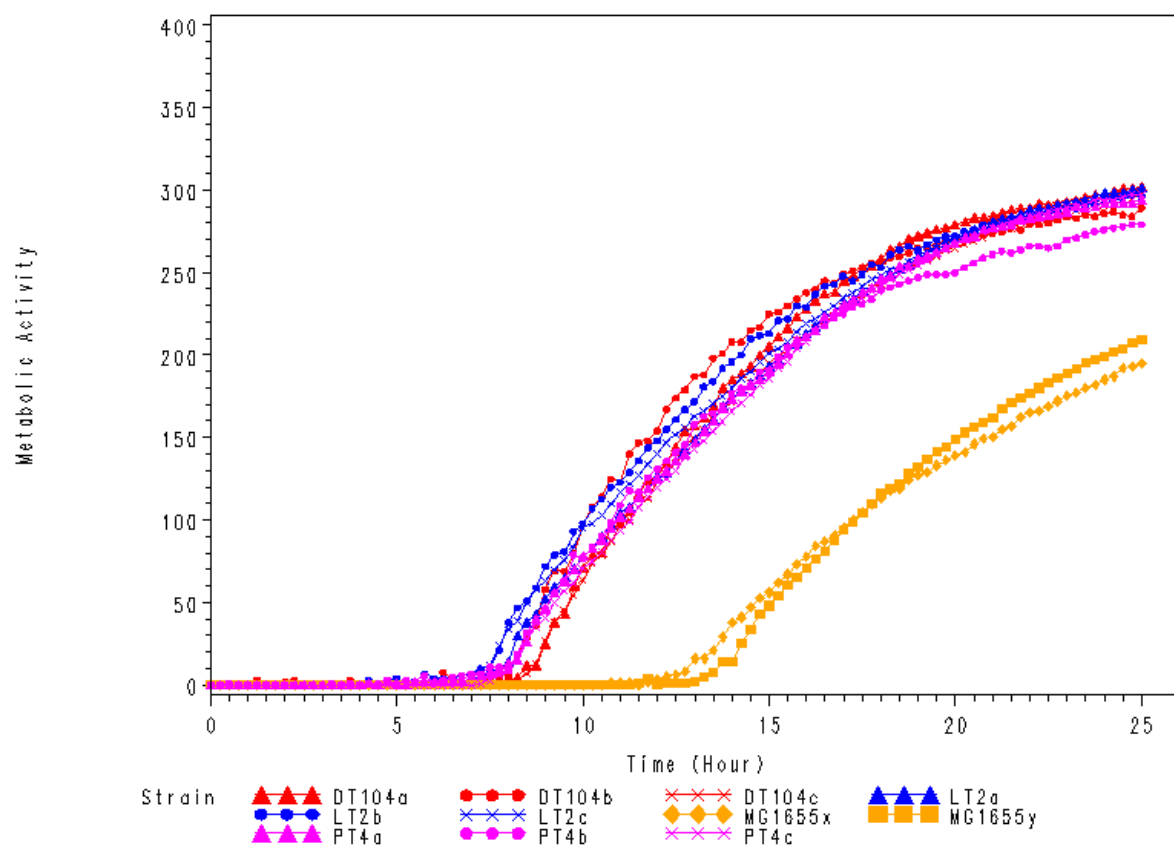

PM03B, C09 (D-Valine)

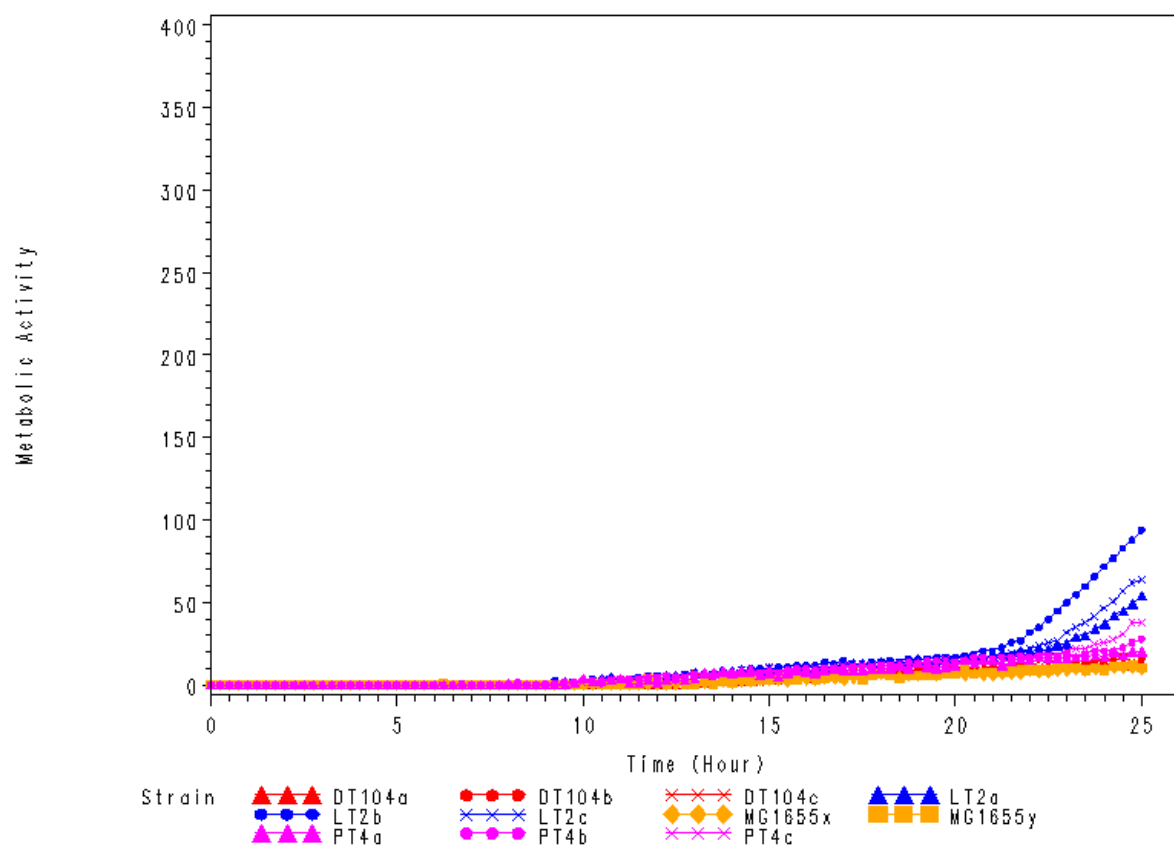

Kinetic Data of Nitrogen Source Utilisation

PM03B, C10 (L-Citrulline)

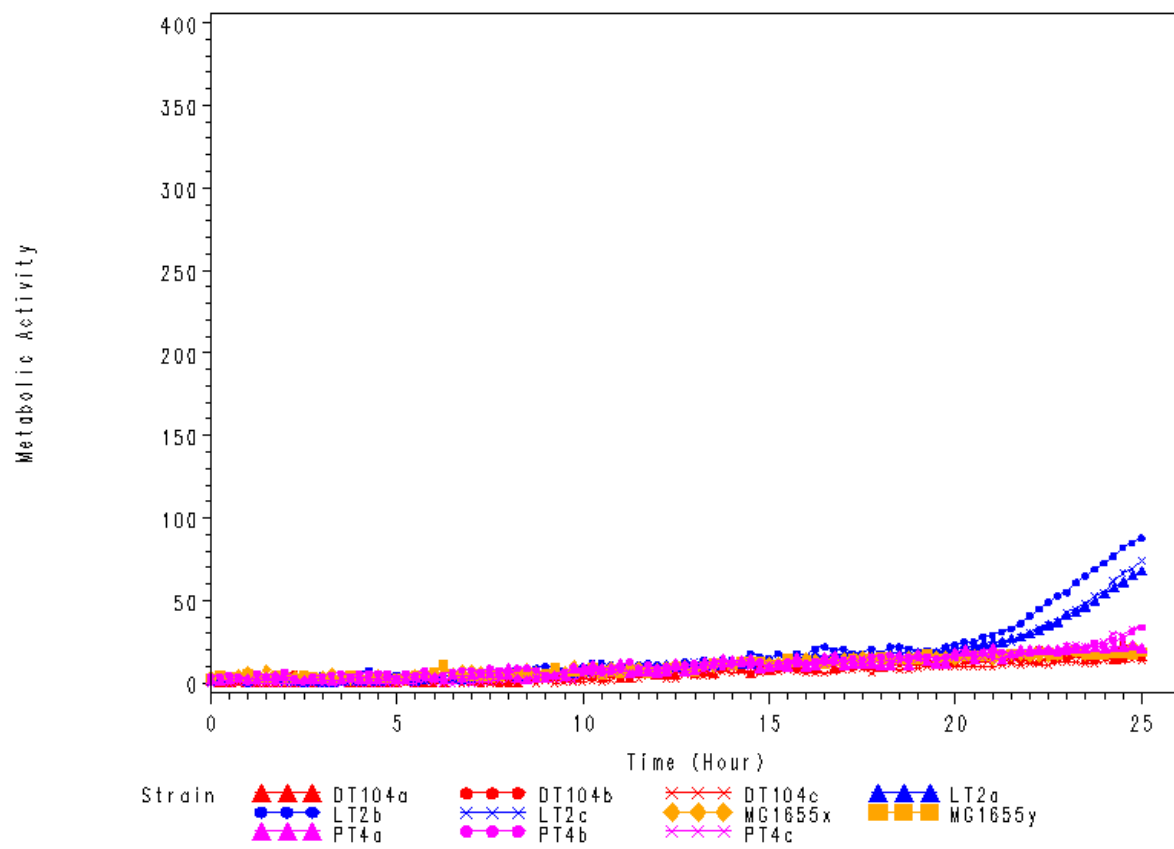

PM03B, C11 (L-Homoserine)

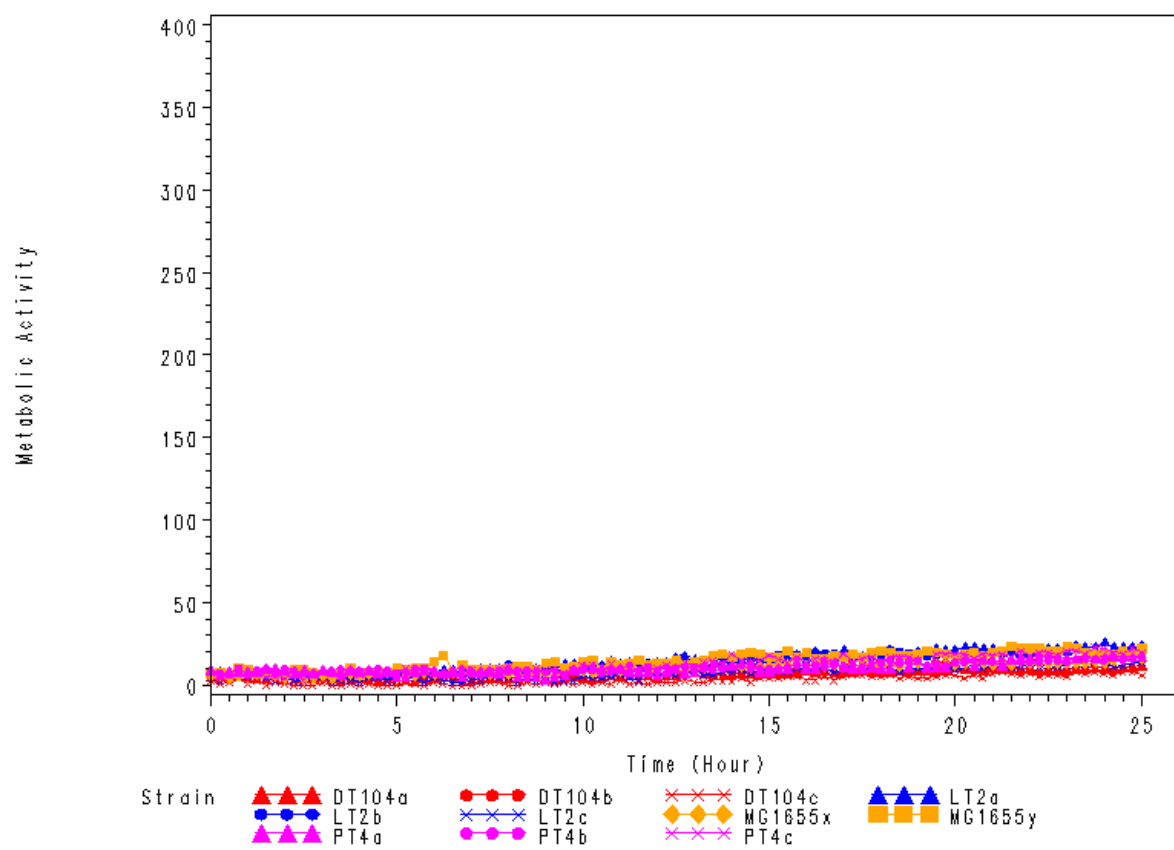

PM03B, C12 (L-Ornithine)

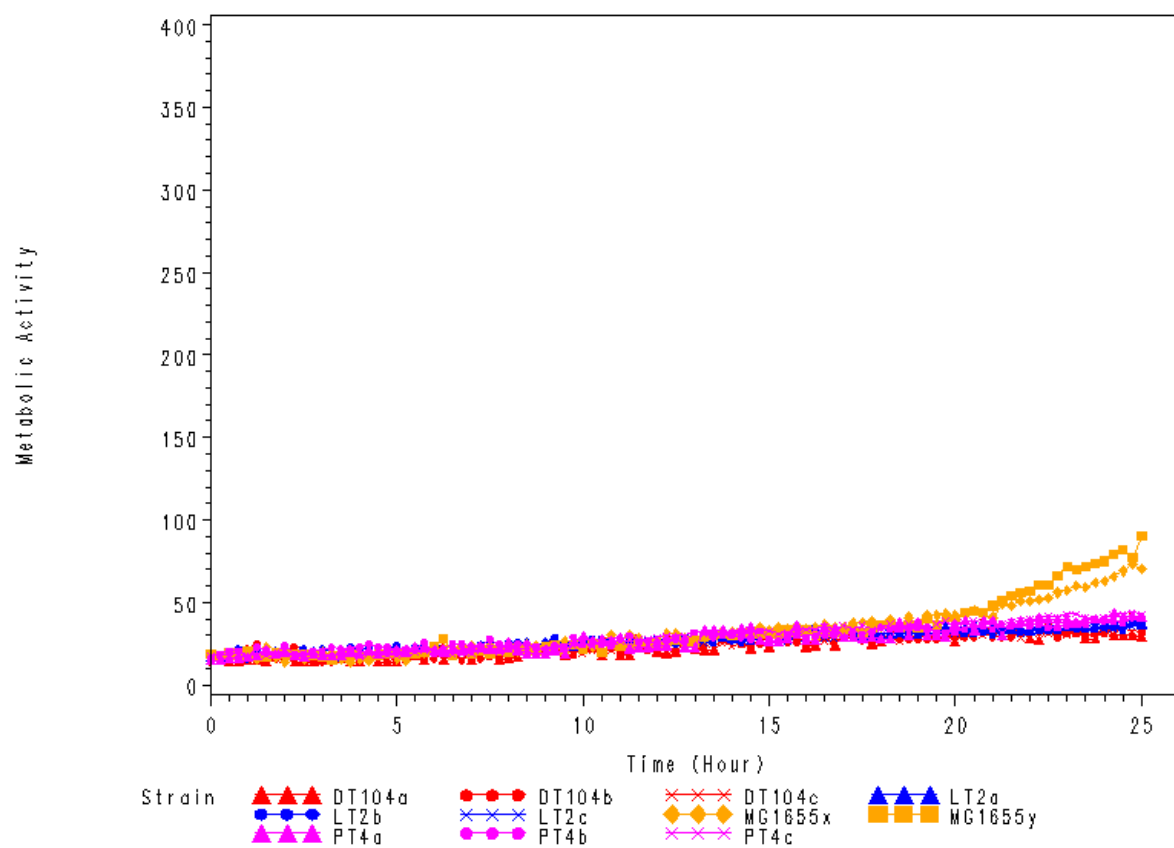

Kinetic Data of Nitrogen Source Utilisation

PM03B, D01 (N-Acetyl-D,L-Glutamic Acid)

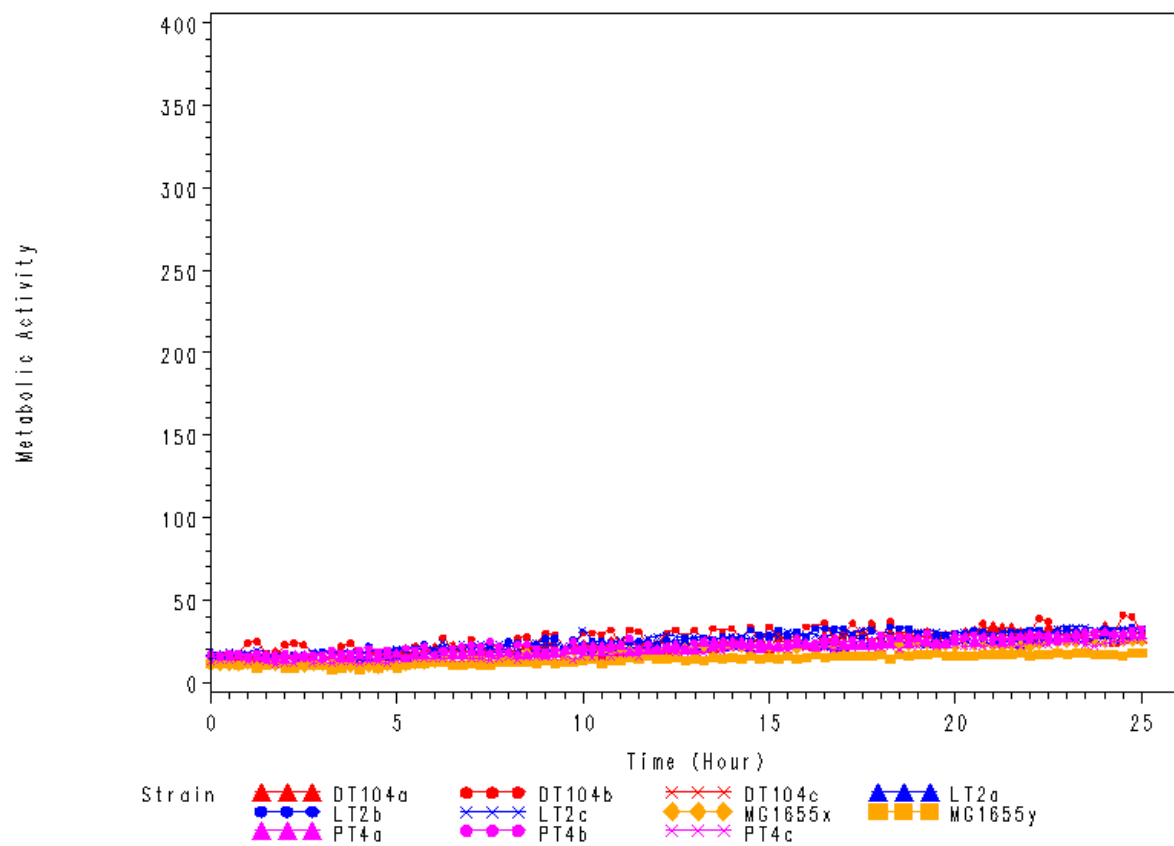

PM03B, D02 (N-Phthaloyl-L-Glutamic Acid)

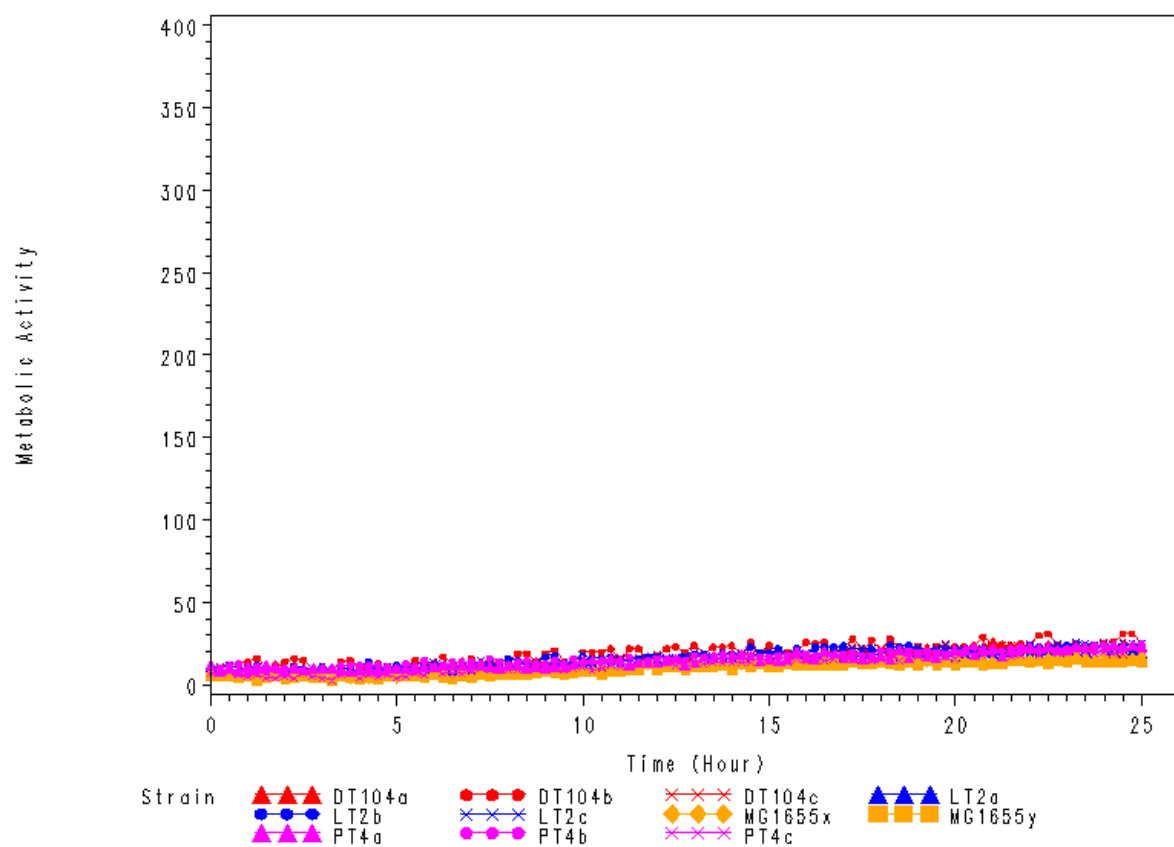

PM03B, D03 (L-Pyrroglutamic Acid)

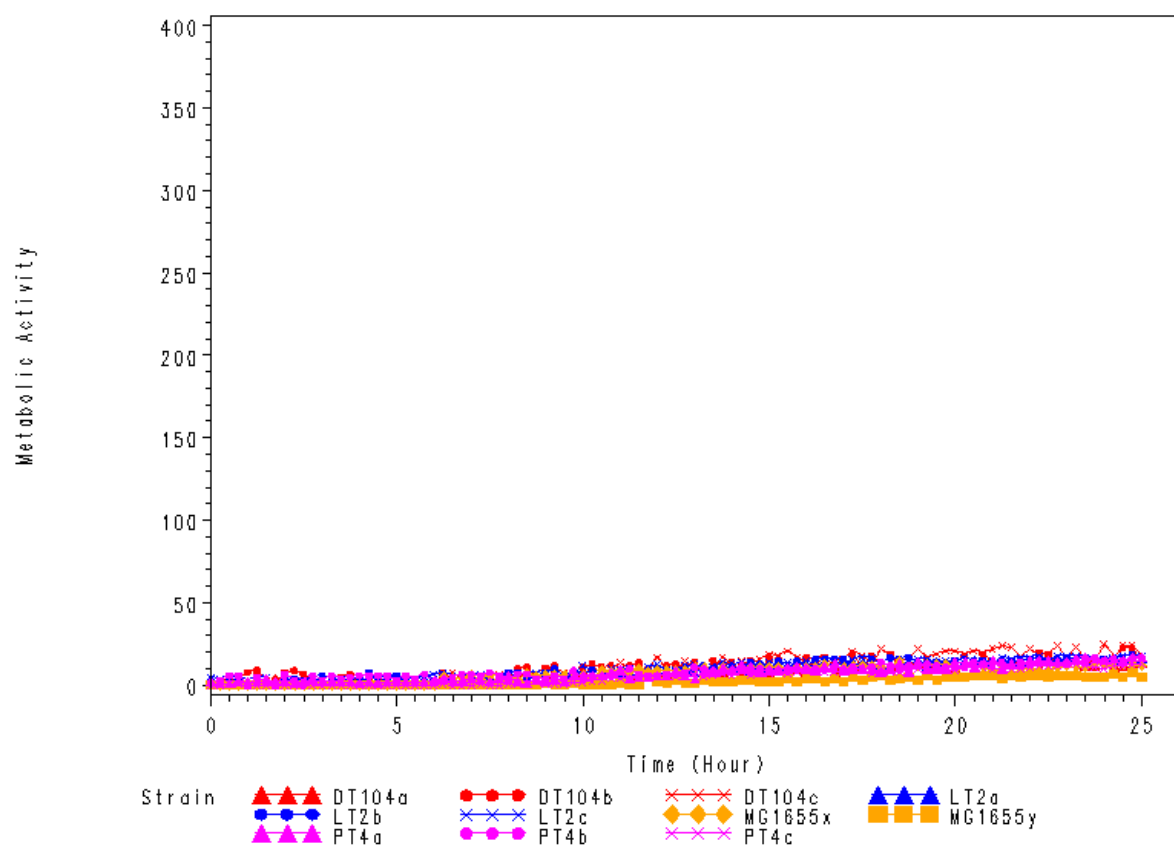

Kinetic Data of Nitrogen Source Utilisation

PM03B, D04 (Hydroxylamine)

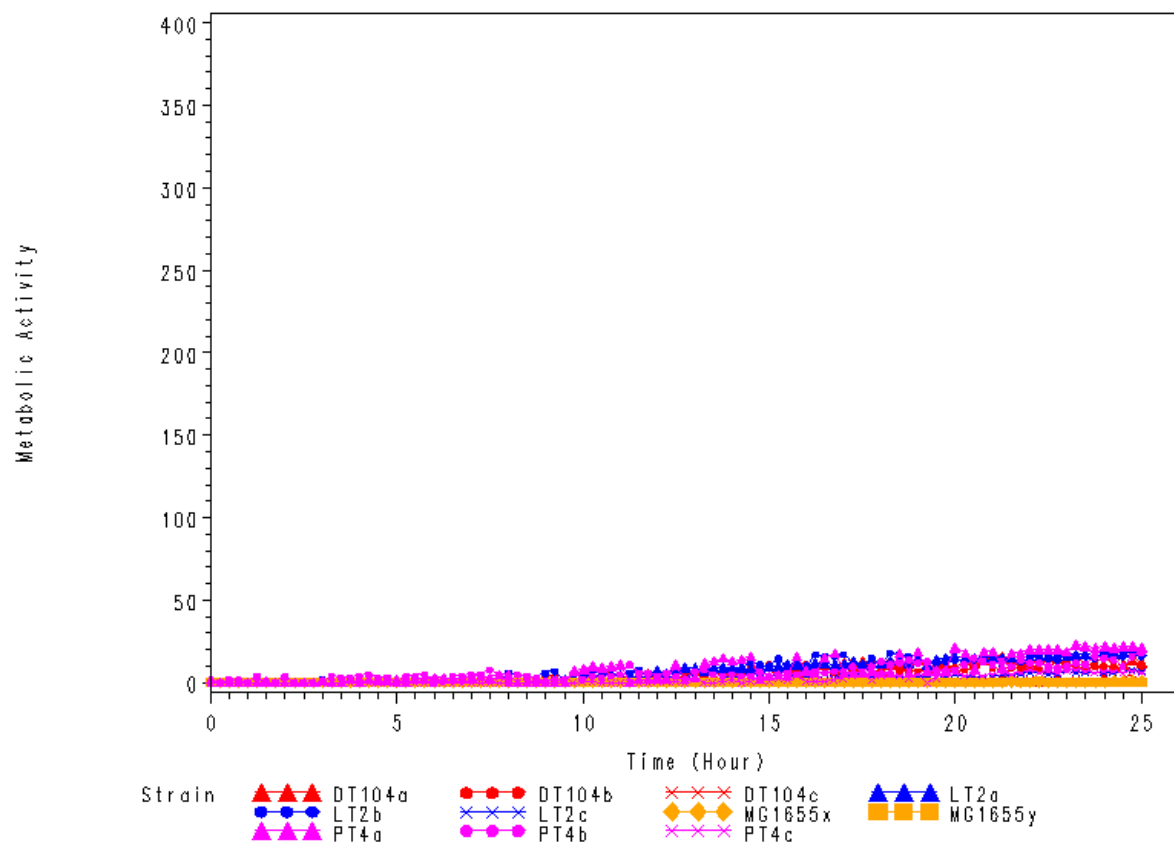

PM03B, D05 (Methylamine)

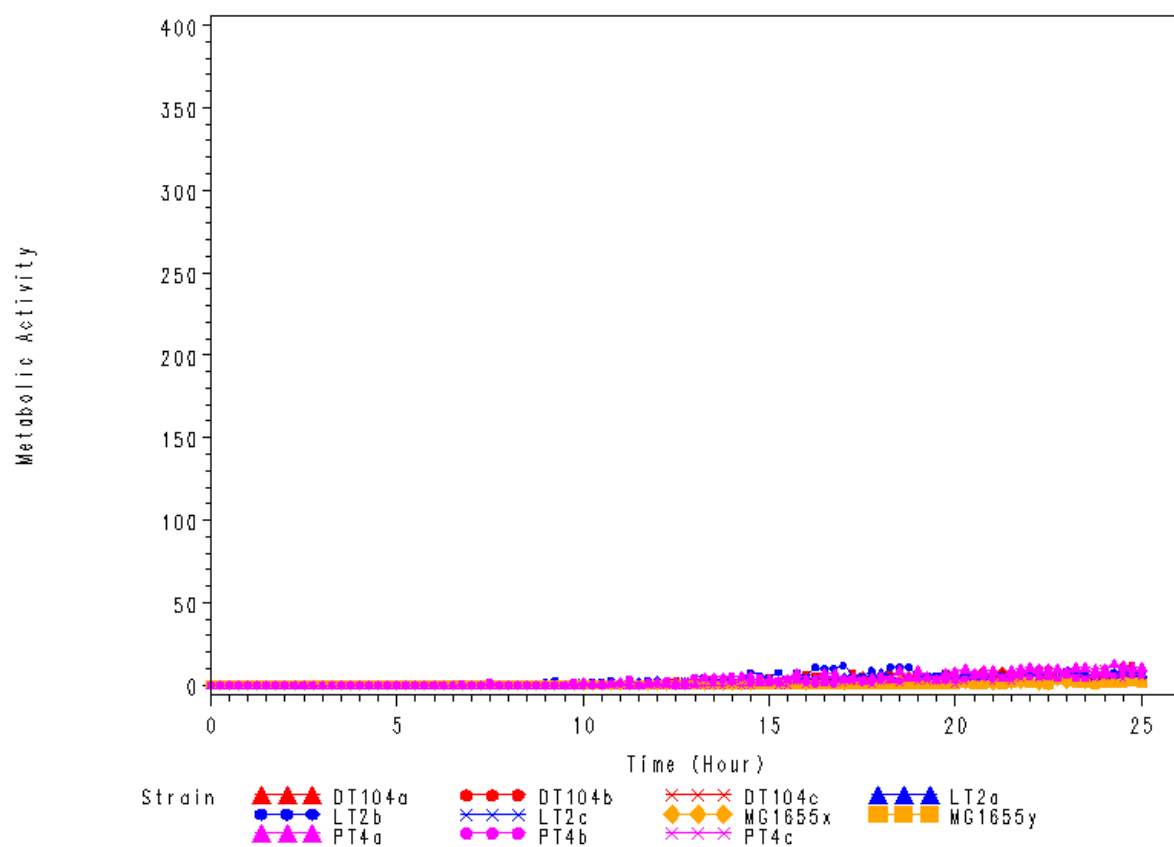

PM03B, D06 (N-Amylamine)

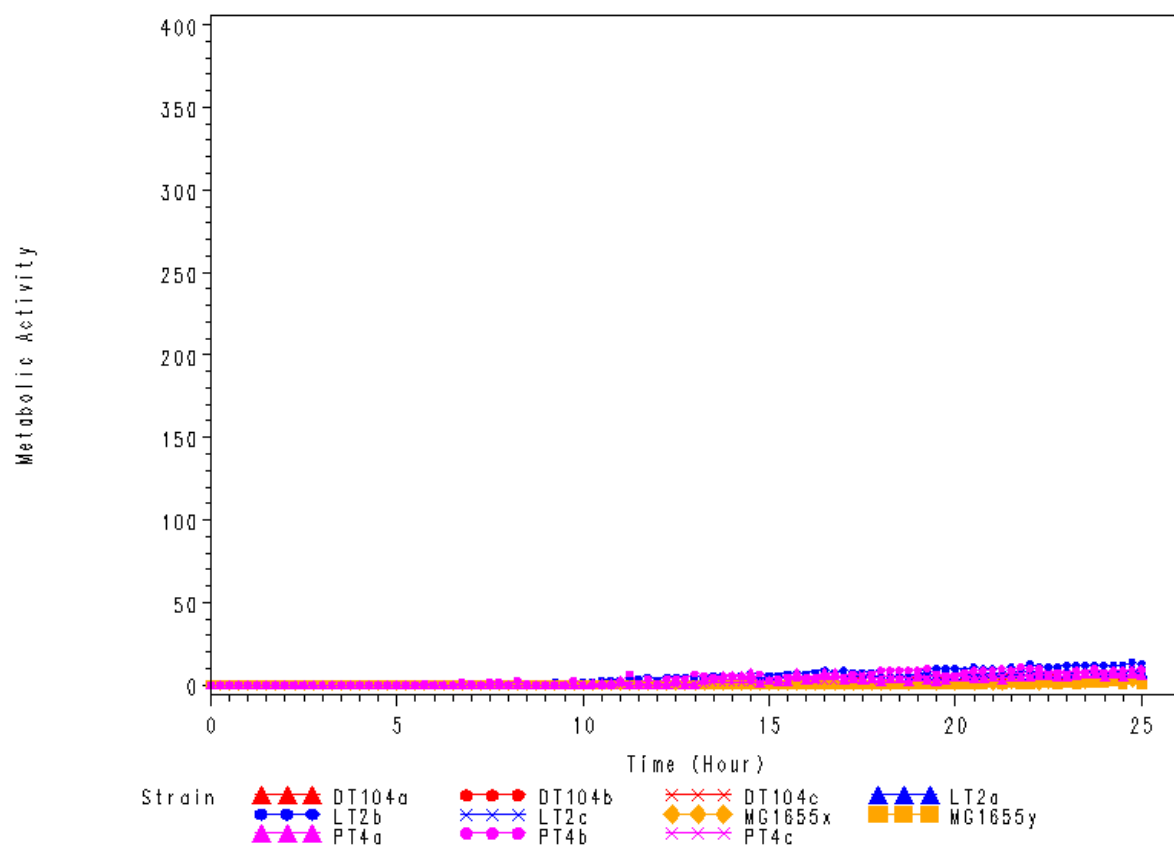

Kinetic Data of Nitrogen Source Utilisation

PM03B, D07 (N-Butylamine)

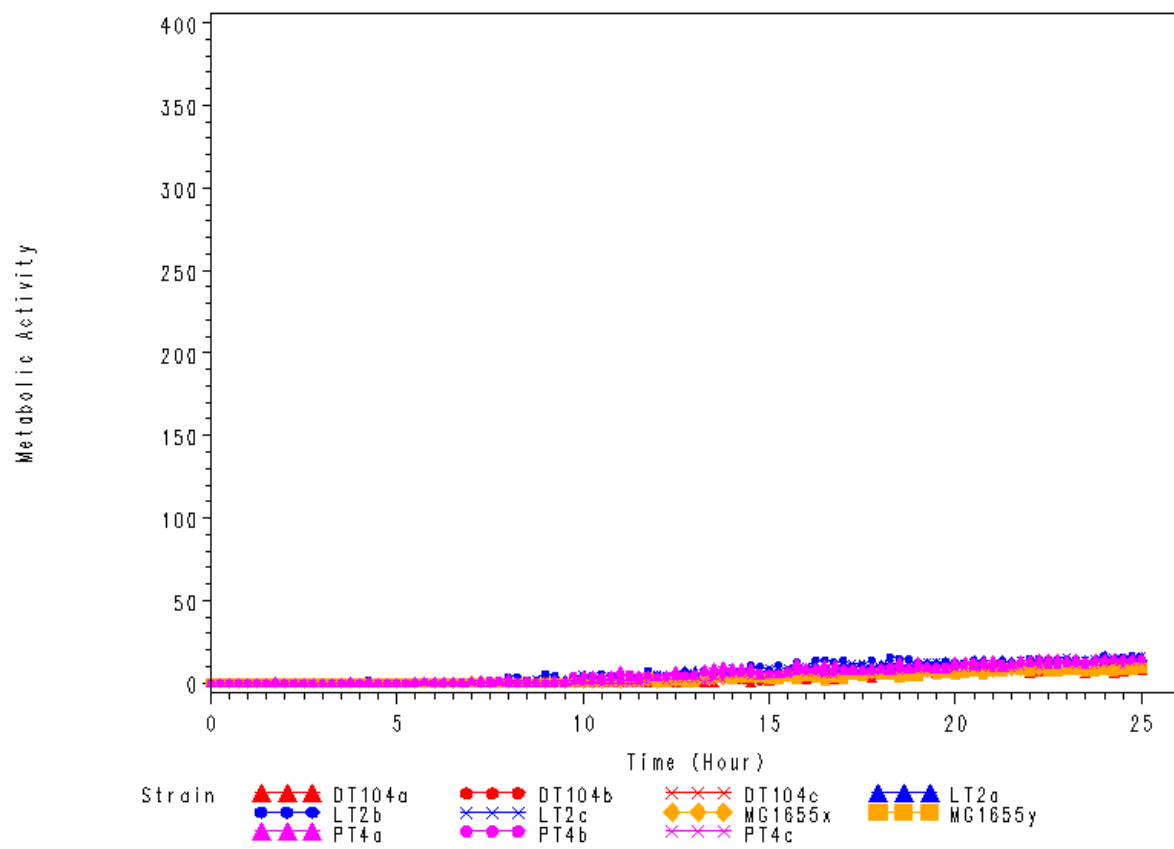

PM03B, D08 (Ethylamine)

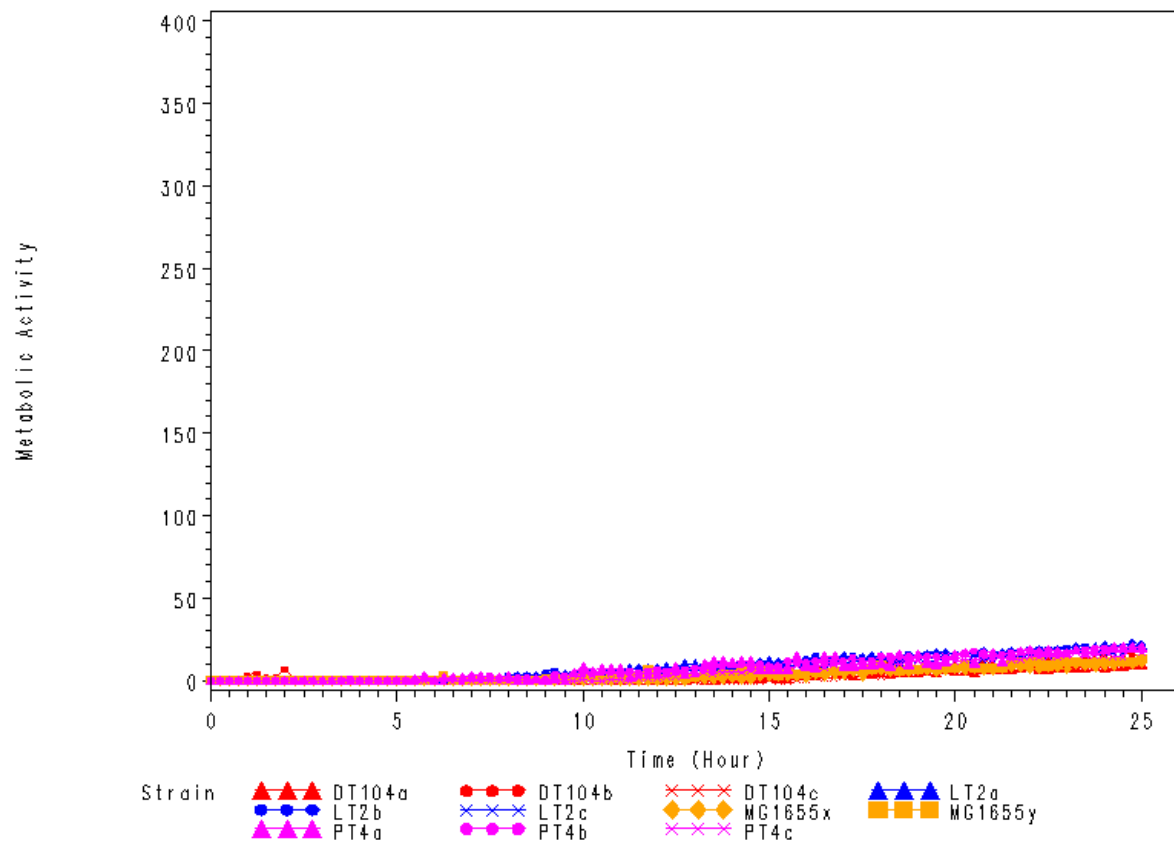

PM03B, D09 (Ethanolamine)

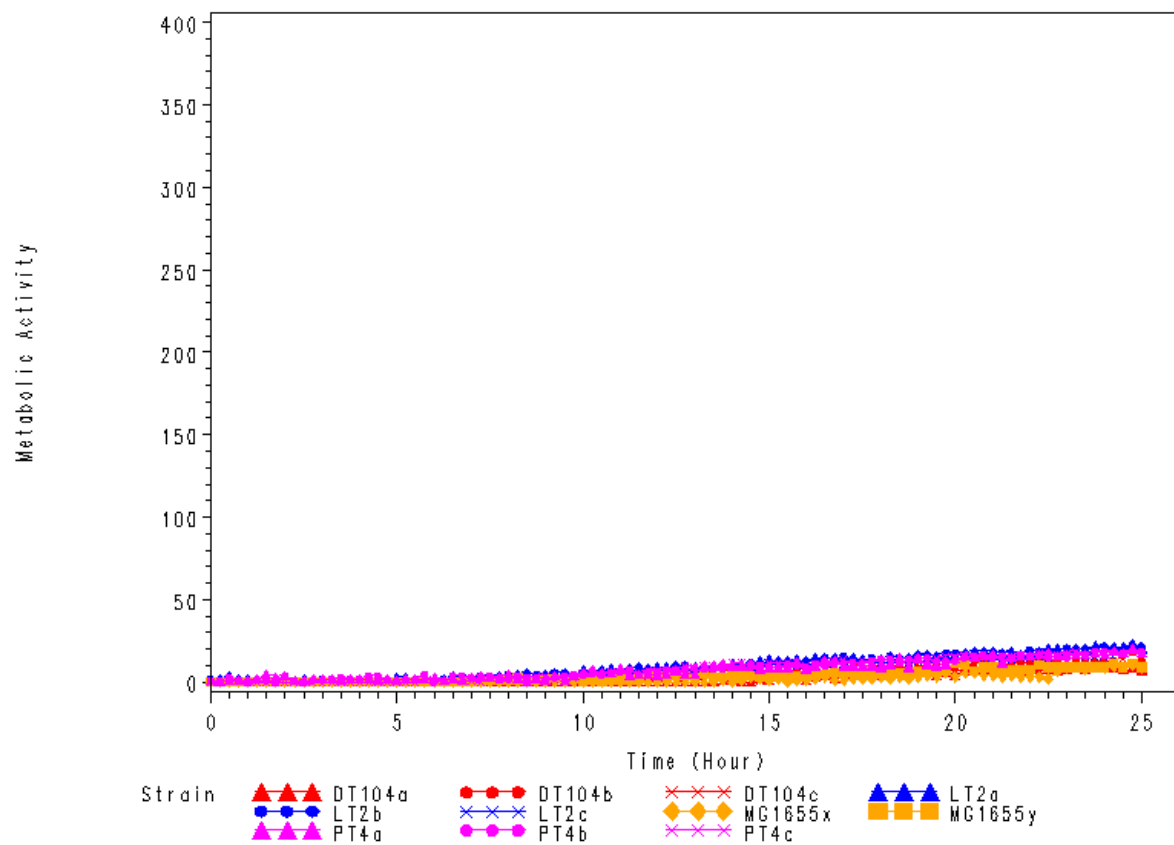

Kinetic Data of Nitrogen Source Utilisation

PM03B, D10 (Ethylenediamine)

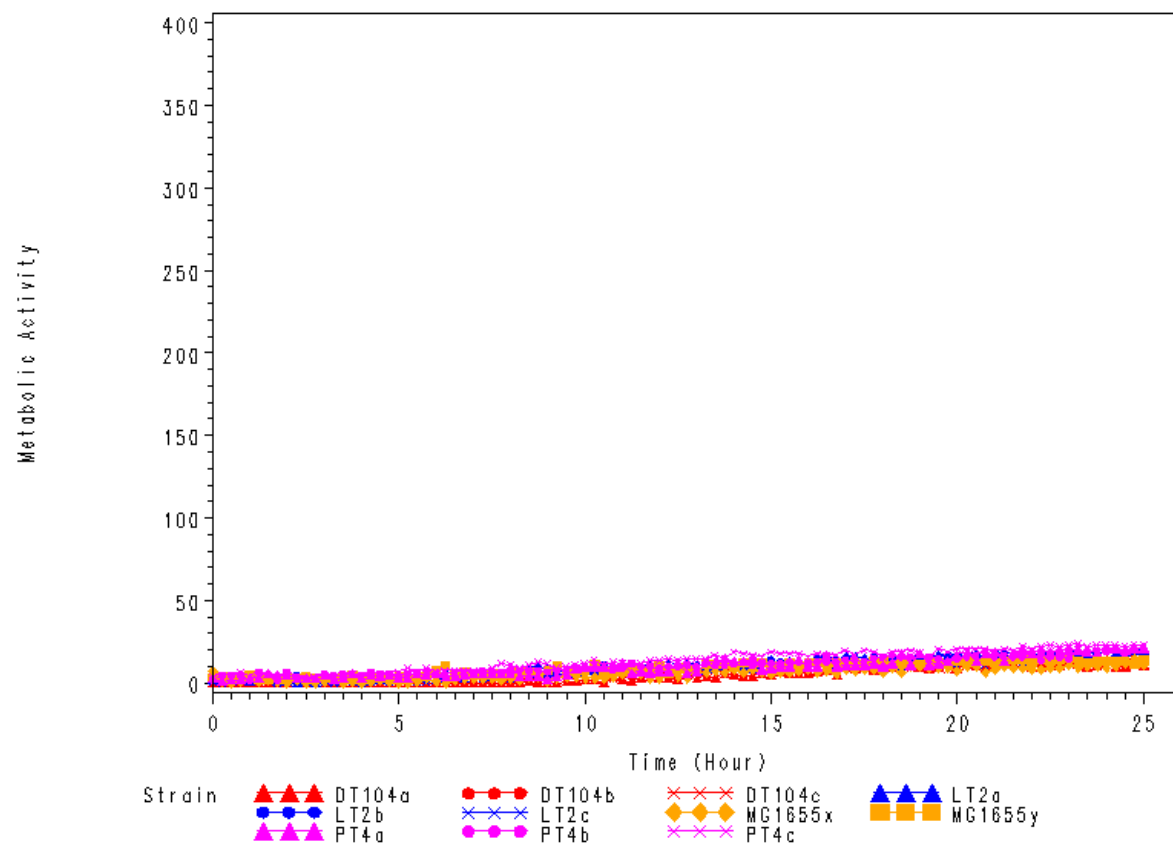

PM03B, D11 (Putrescine)

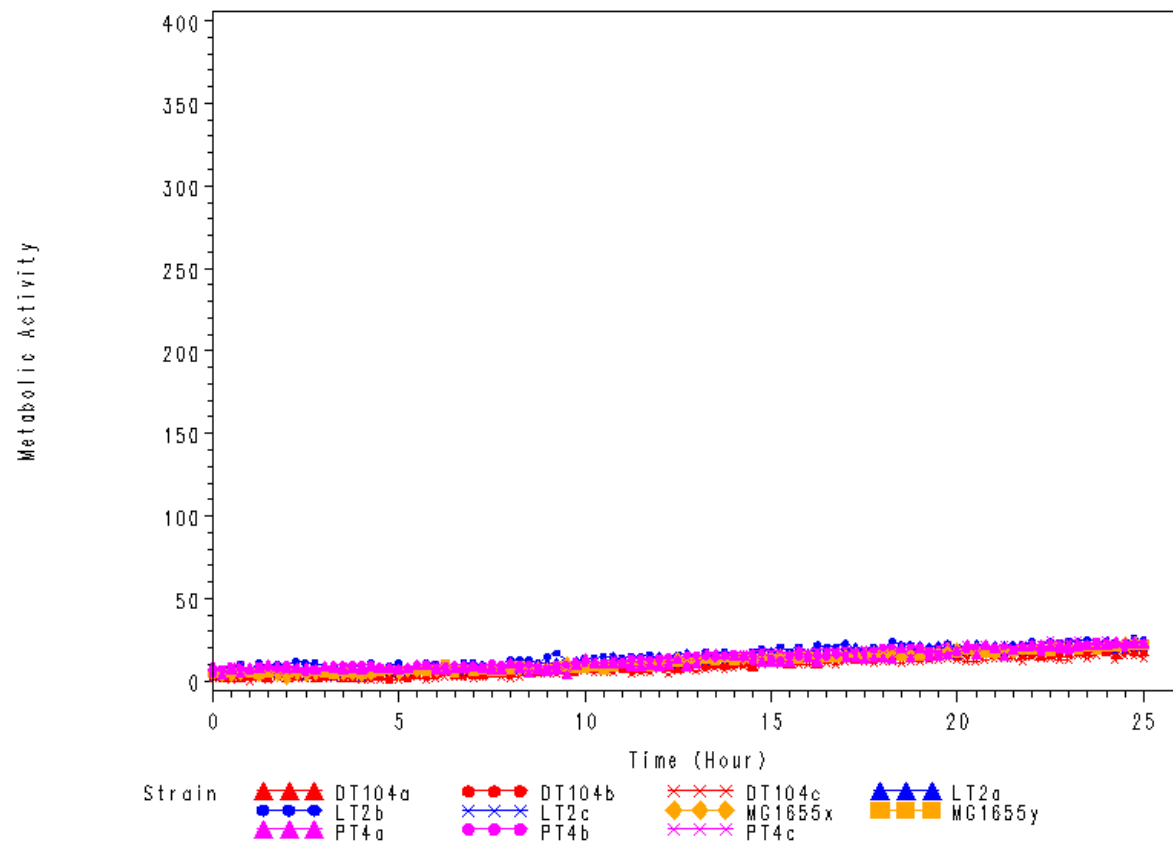

PM03B, D12 (Agmatine)

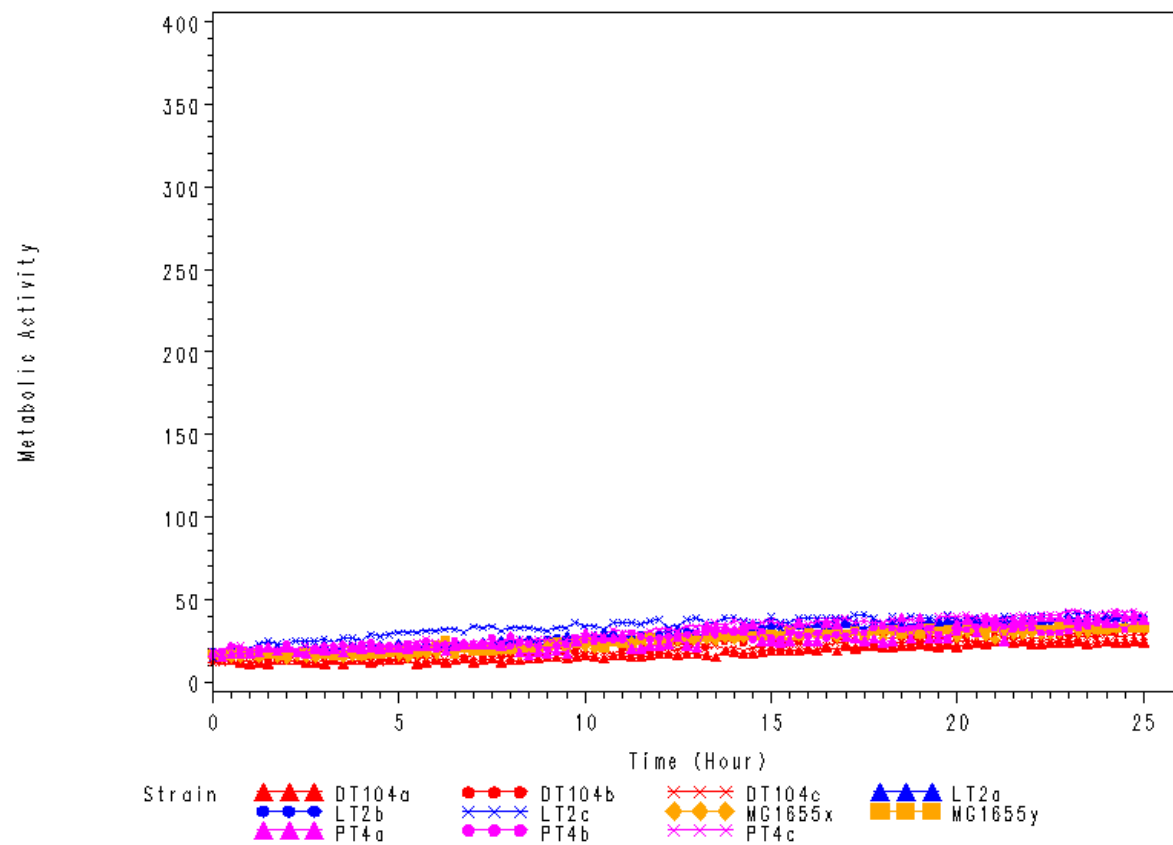



Kinetic Data of Nitrogen Source Utilisation

PM03B, E01 (Histamine)

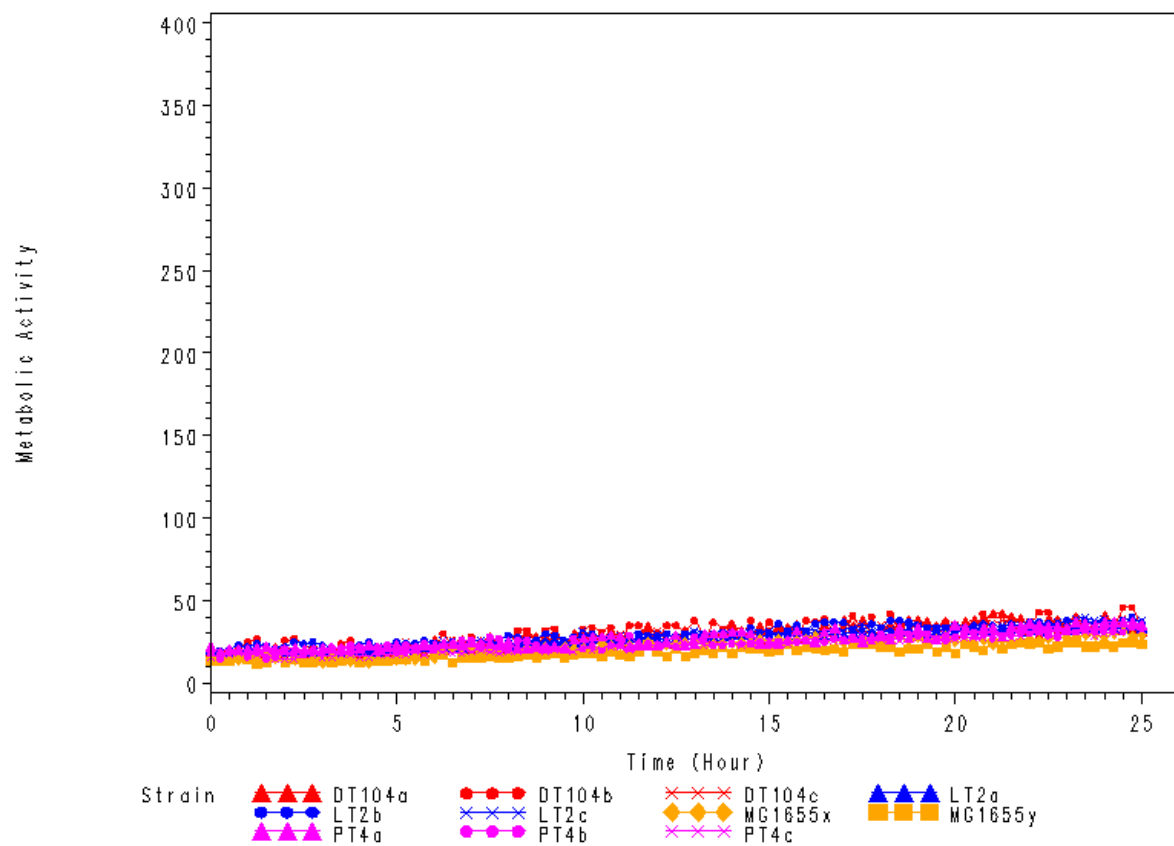

PM03B, E02 (b-Phenylethylamine)

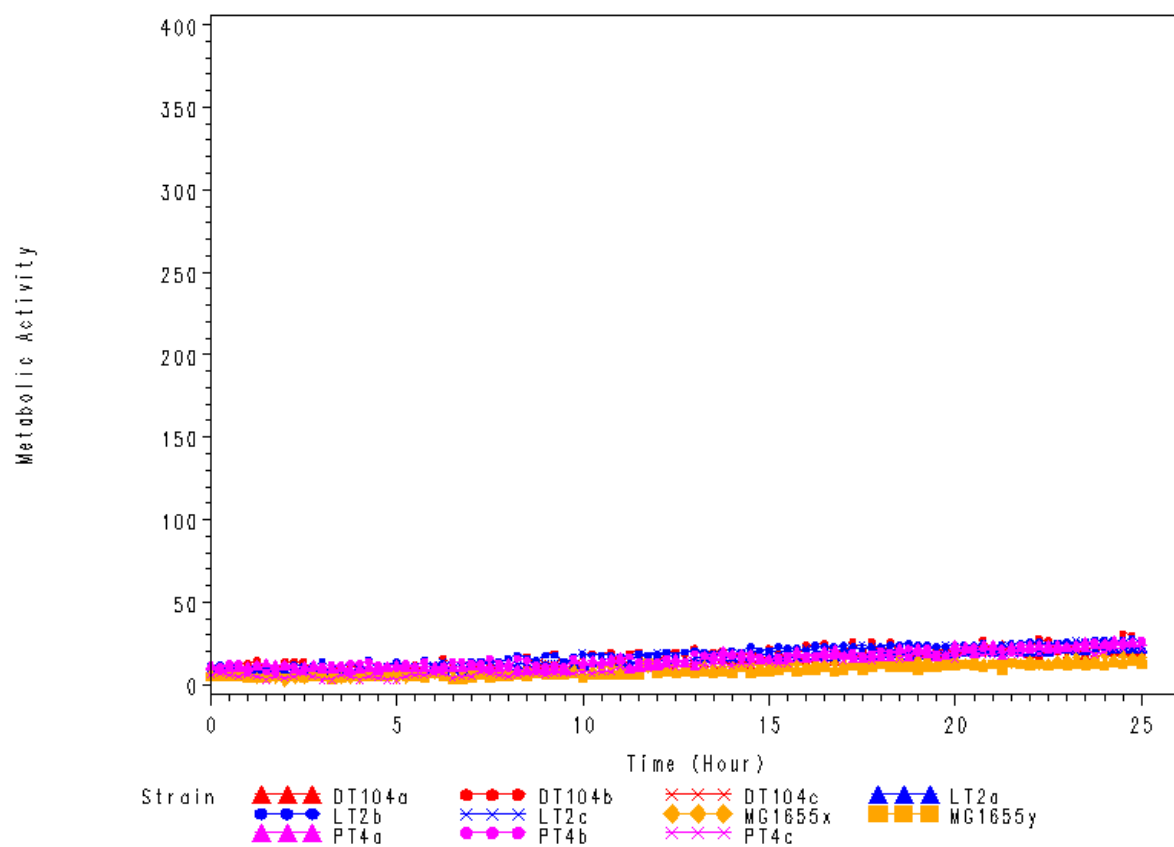

PM03B, E03 (Tyramine)

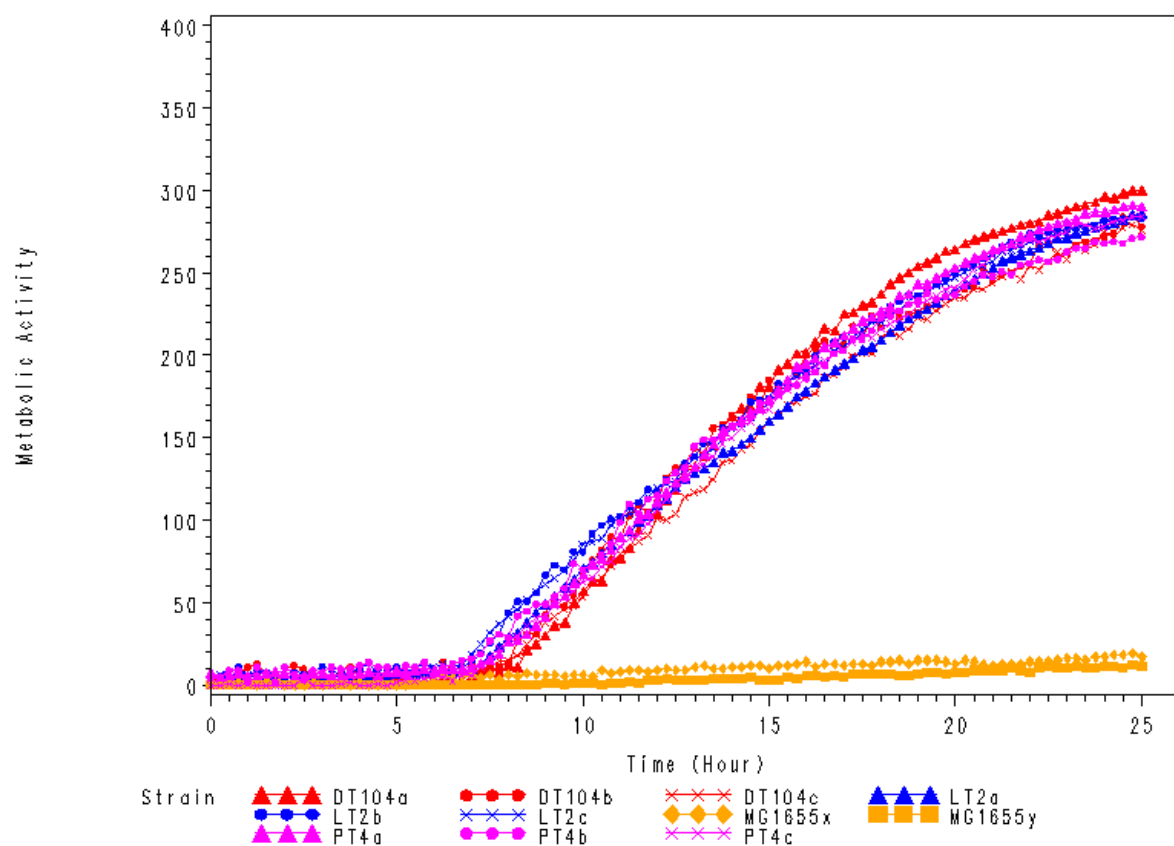

Kinetic Data of Nitrogen Source Utilisation

PM03B, E04 (Acetamide)

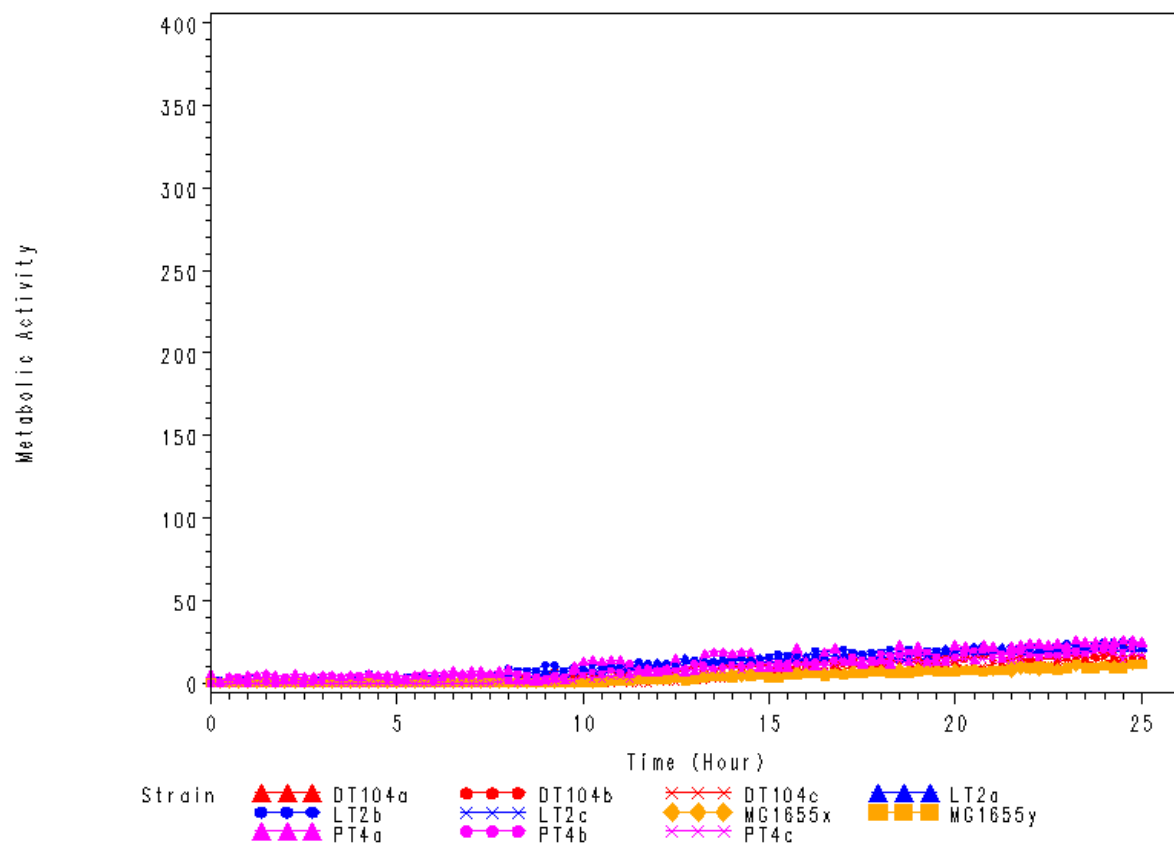

PM03B, E05 (Formamide)

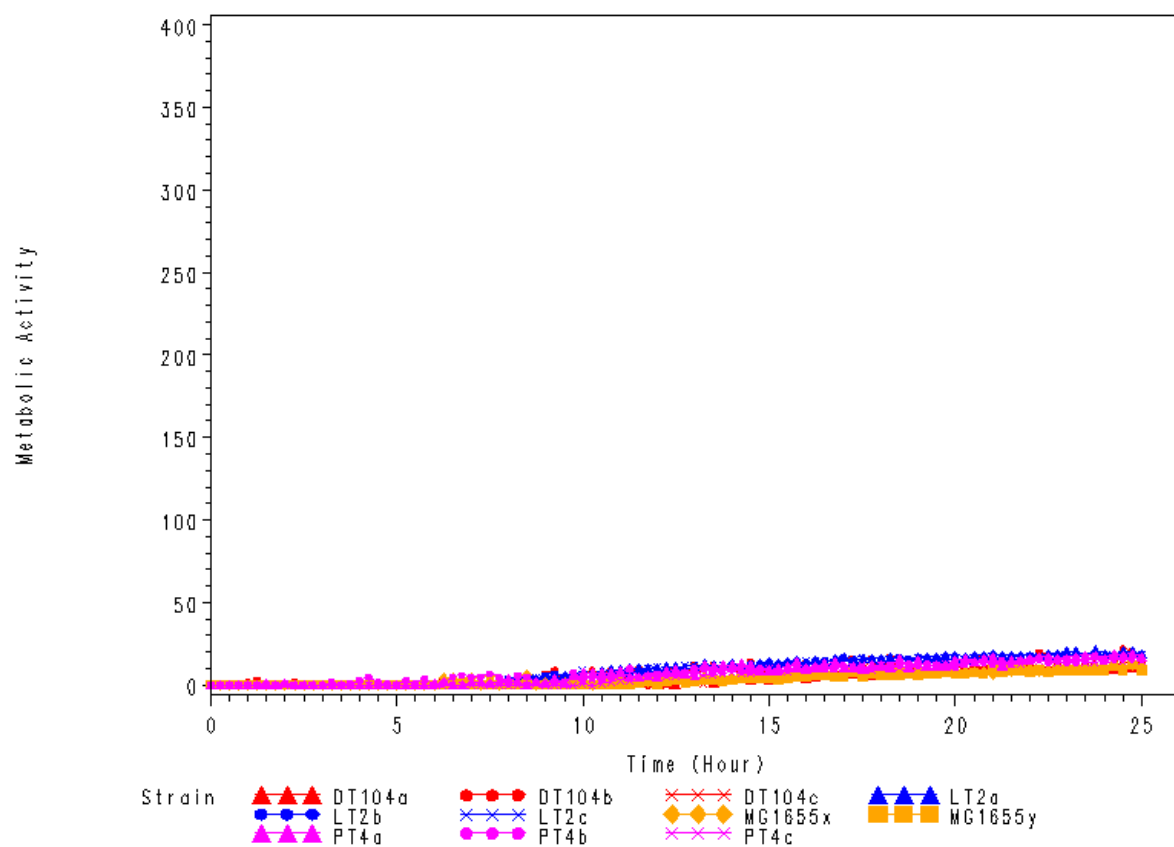

PM03B, E06 (Glucuronamide)

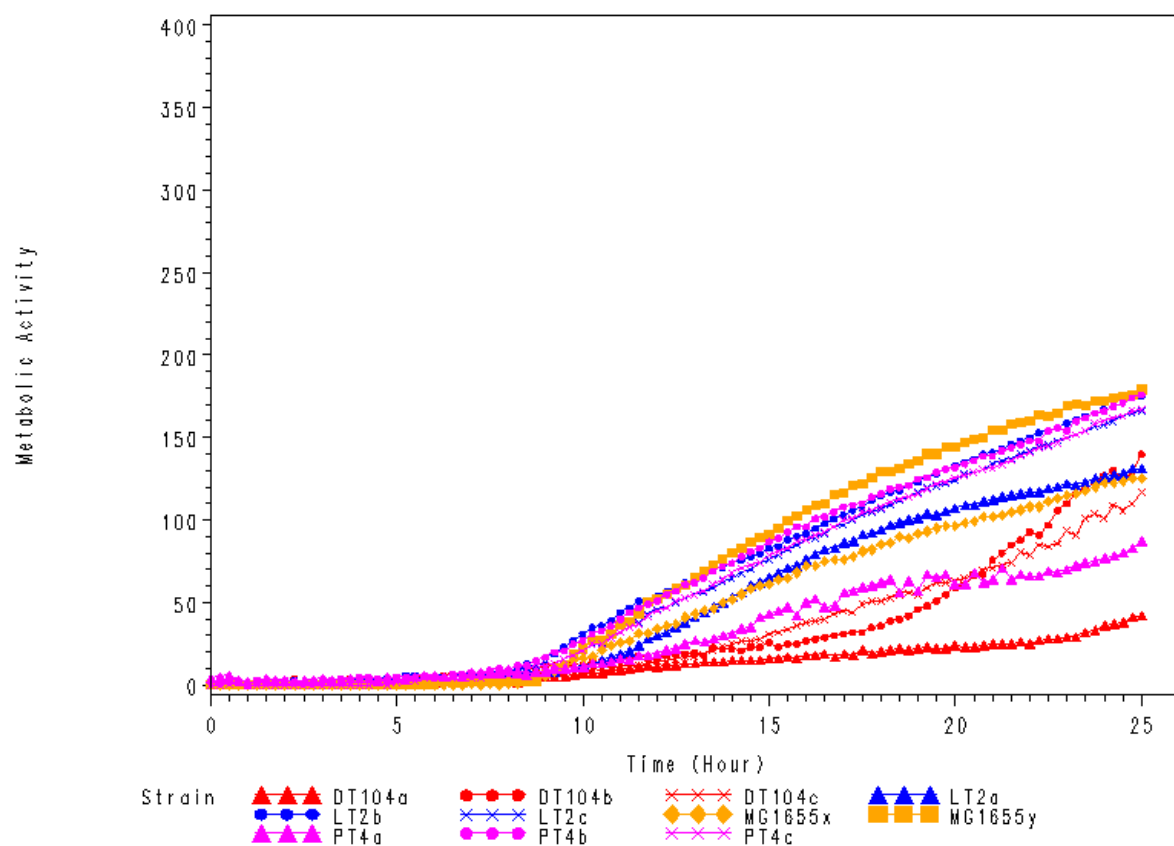

Kinetic Data of Nitrogen Source Utilisation

PM03B, E07 (D,L-Lactamide)

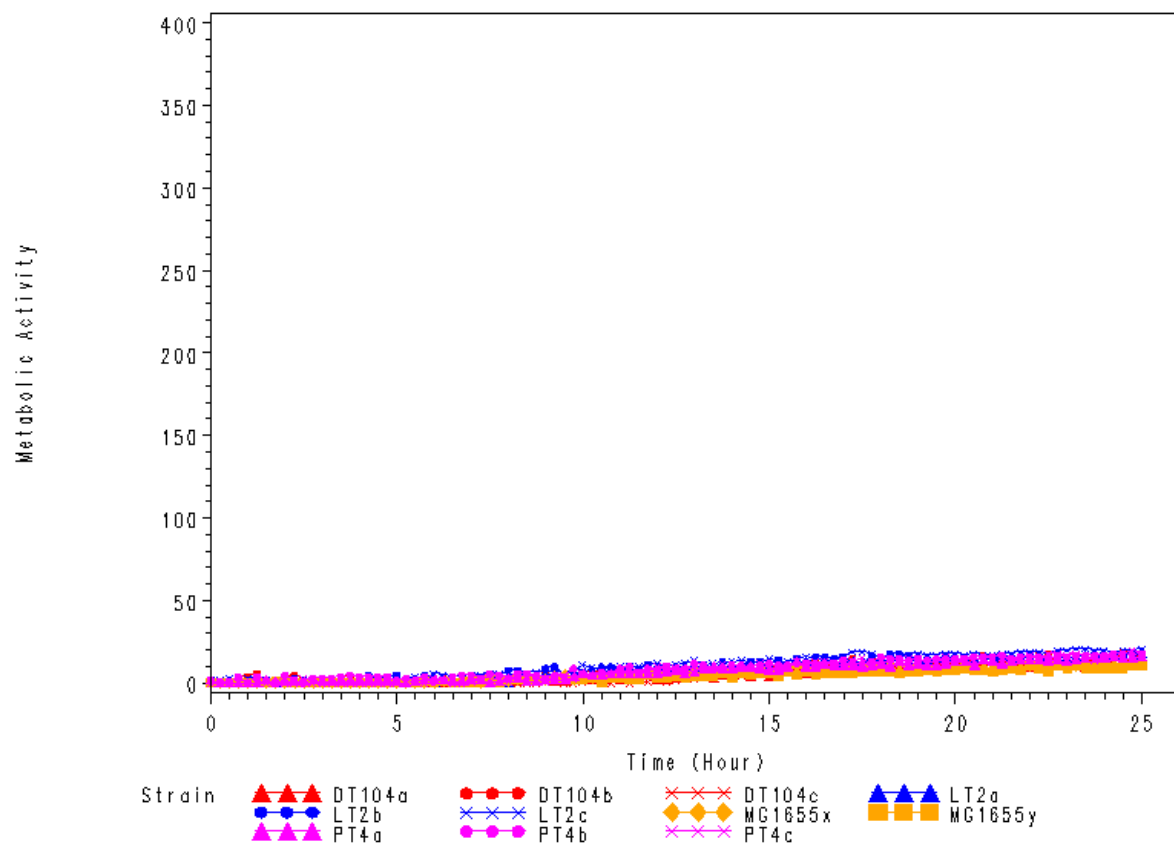

PM03B, E08 (D-Glucosamine)

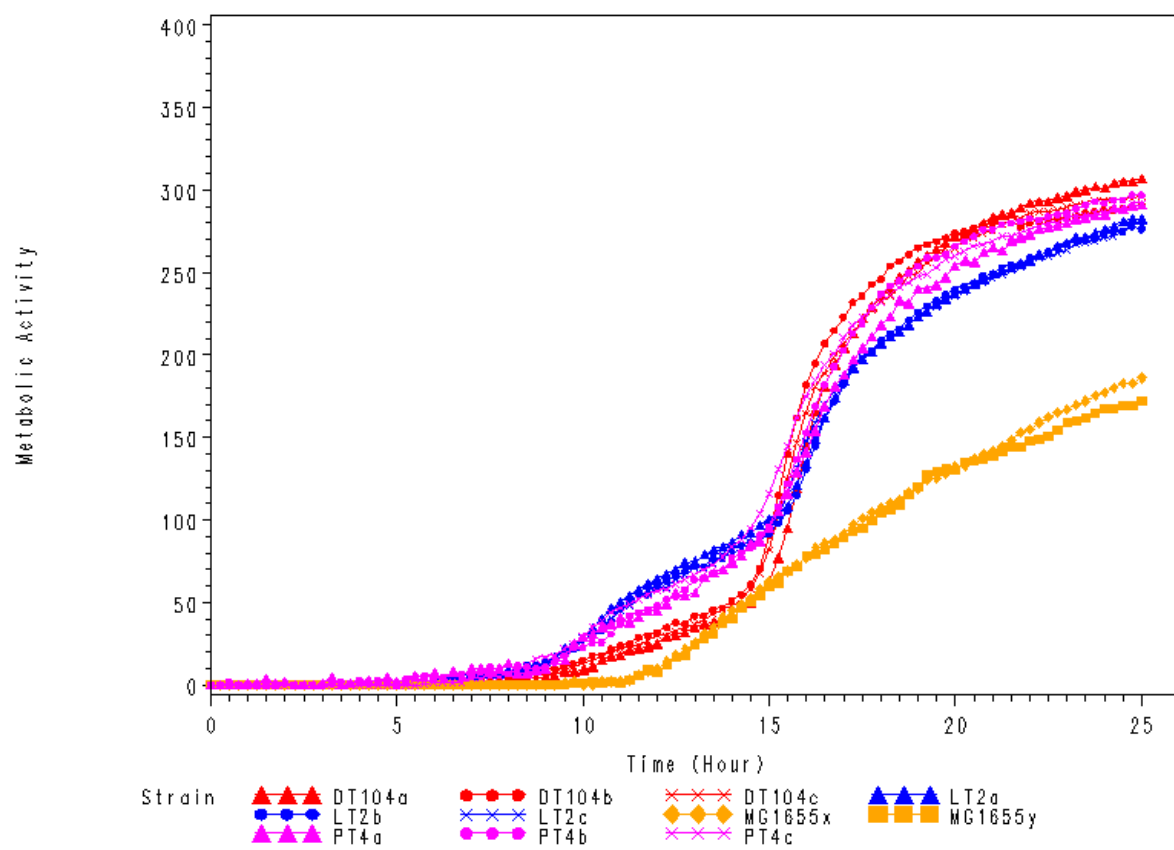

PM03B, E09 (D-Galactosamine)

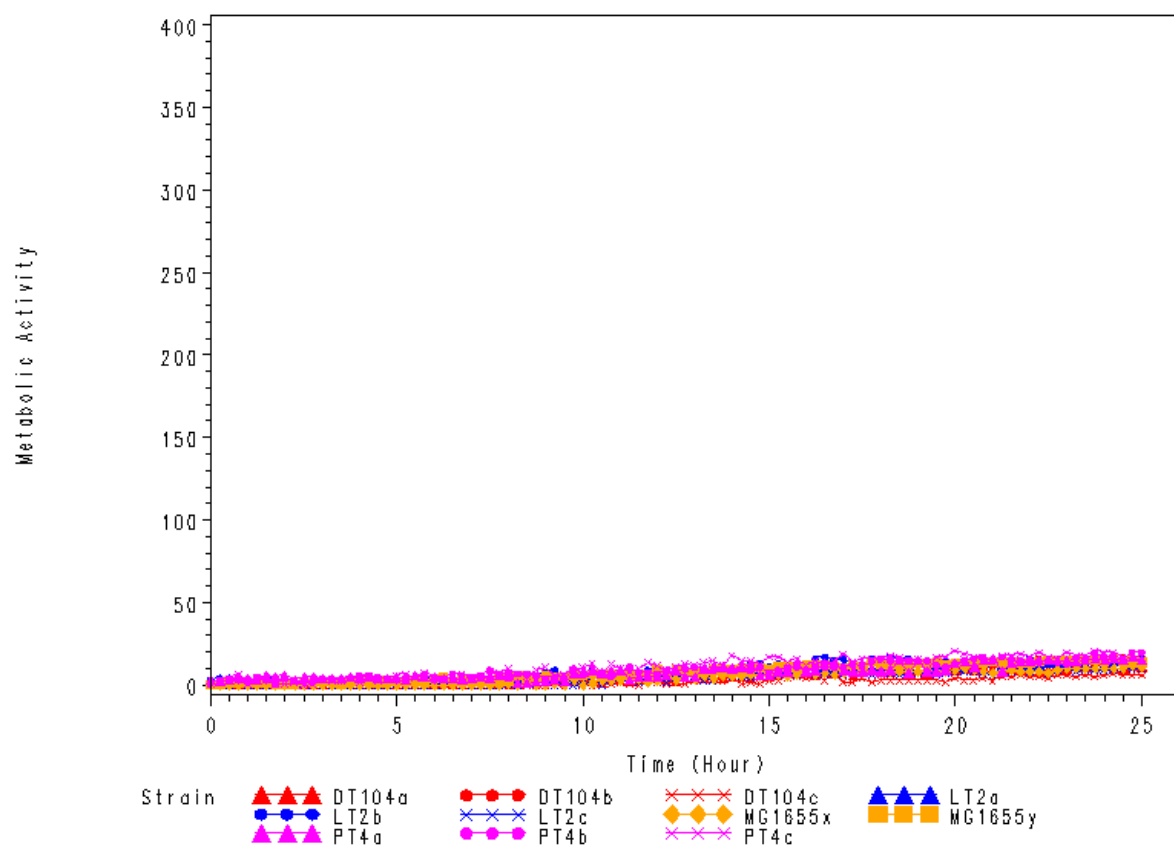

Kinetic Data of Nitrogen Source Utilisation

PM03B, E10 (D-Mannosamine)

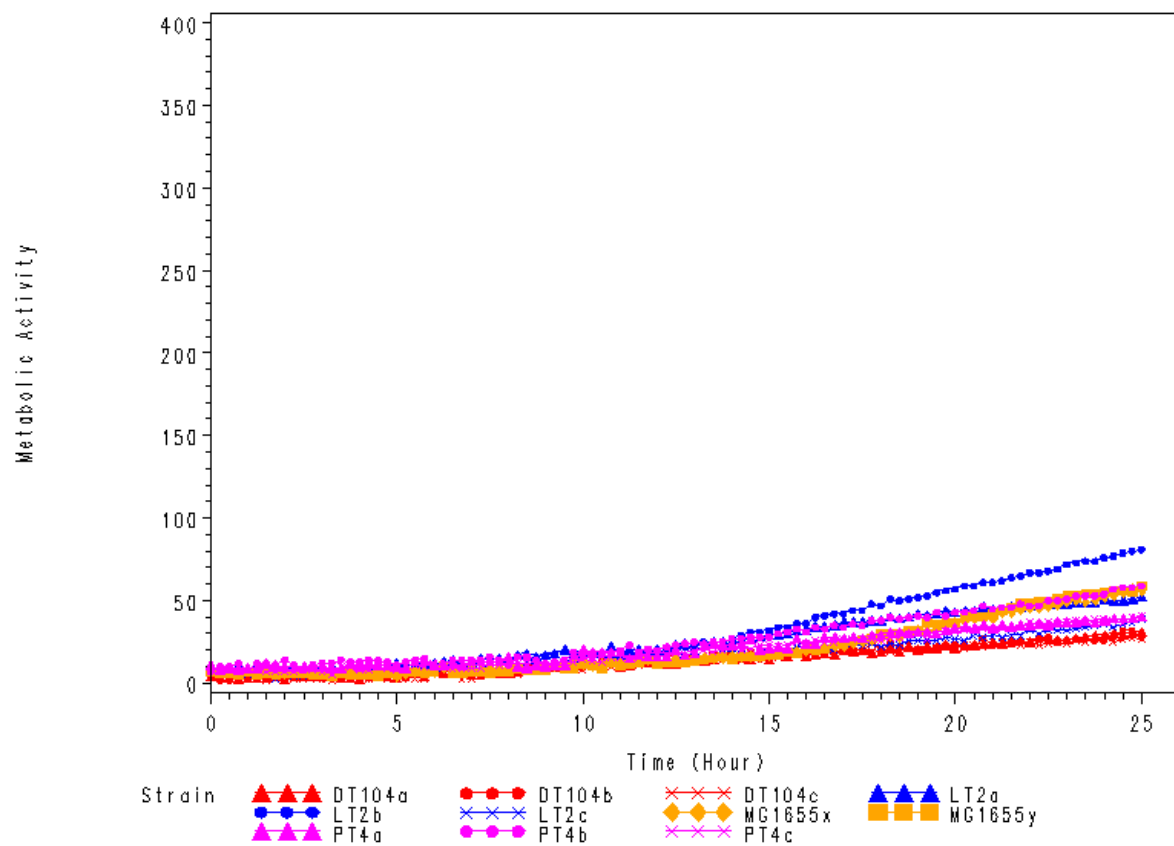

PM03B, E11 (N-Acetyl-D-Glucosamine)

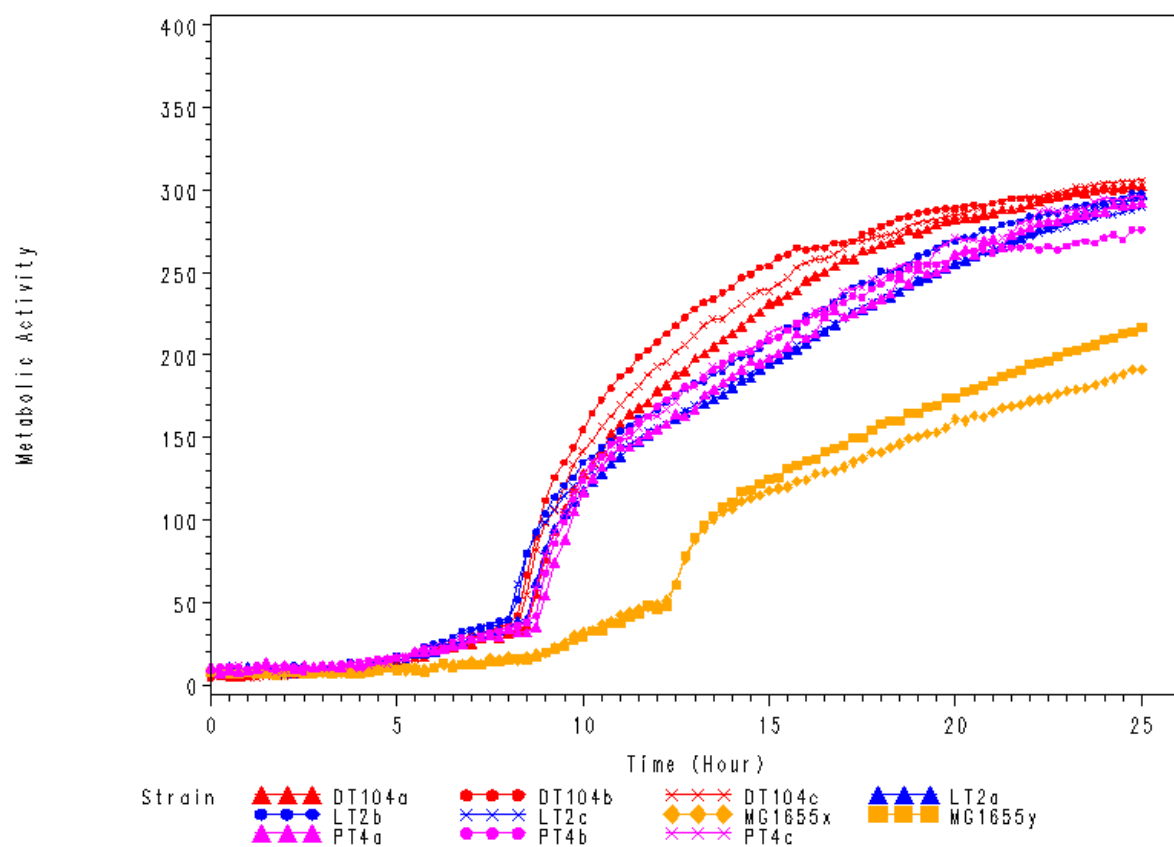

PM03B, E12 (N-Acetyl-D-Galactosamine)

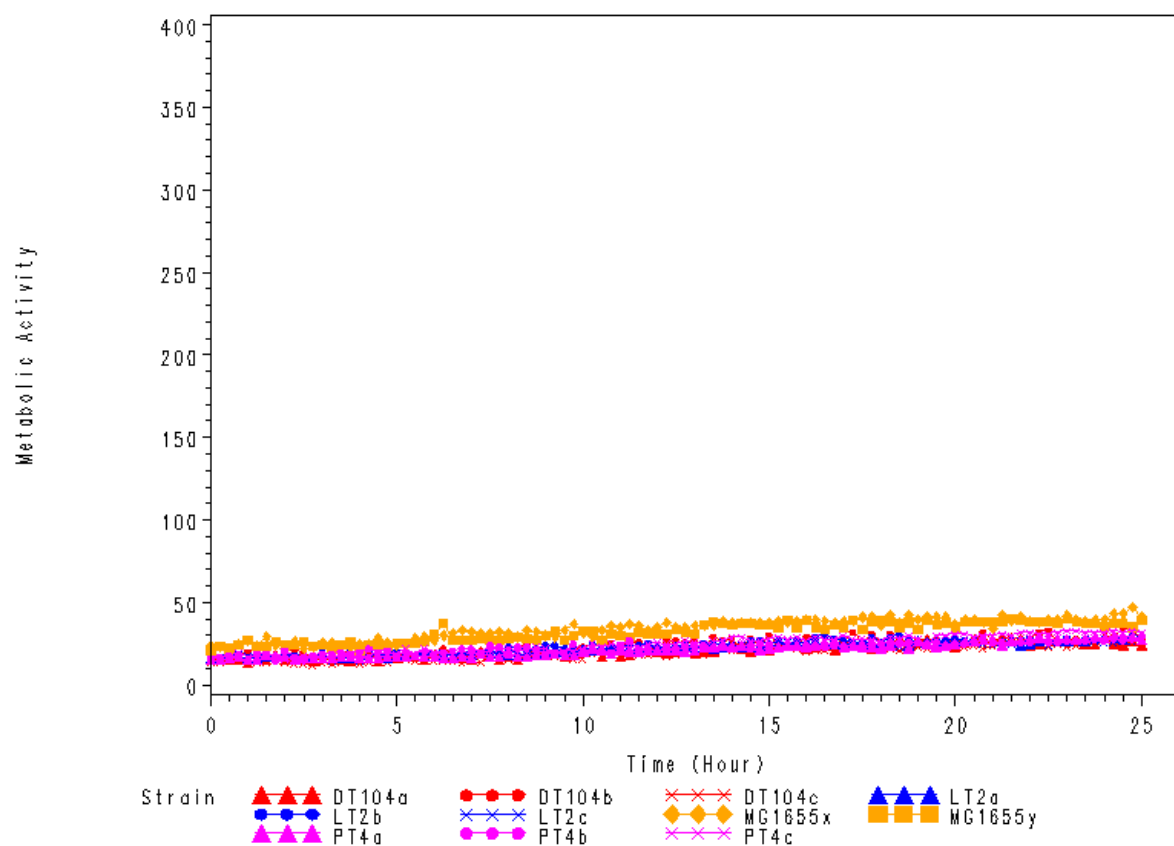

Kinetic Data of Nitrogen Source Utilisation

PM03B, F01 (N-Acetyl-D-Mannosamine)

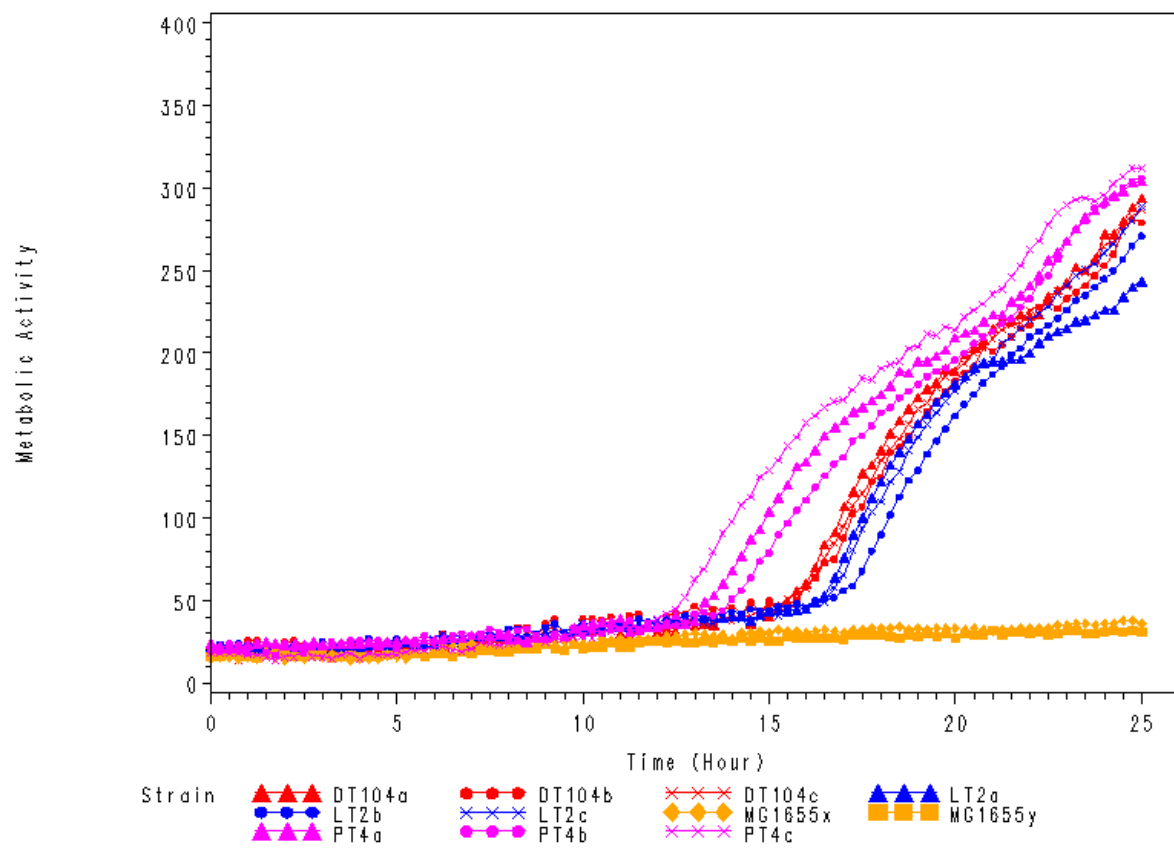

PM03B, F02 (Adenine)

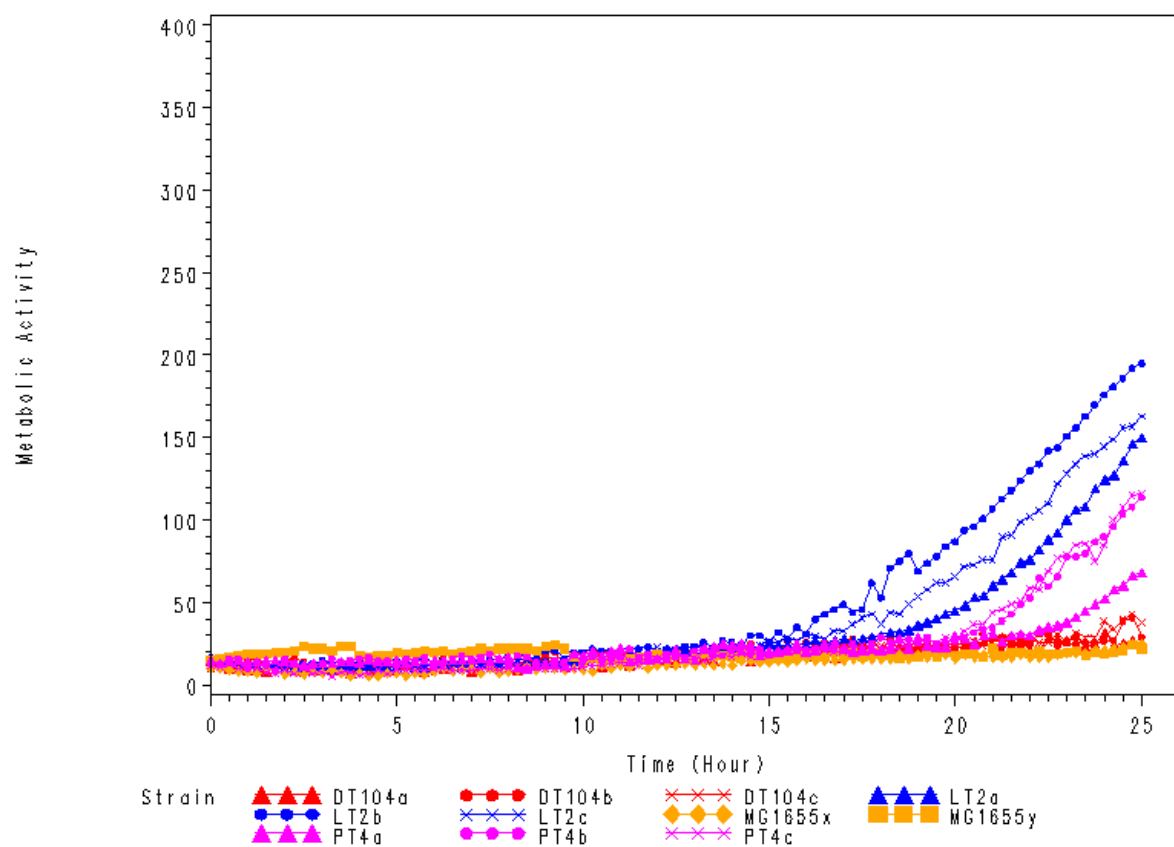

PM03B, F03 (Adenosine)

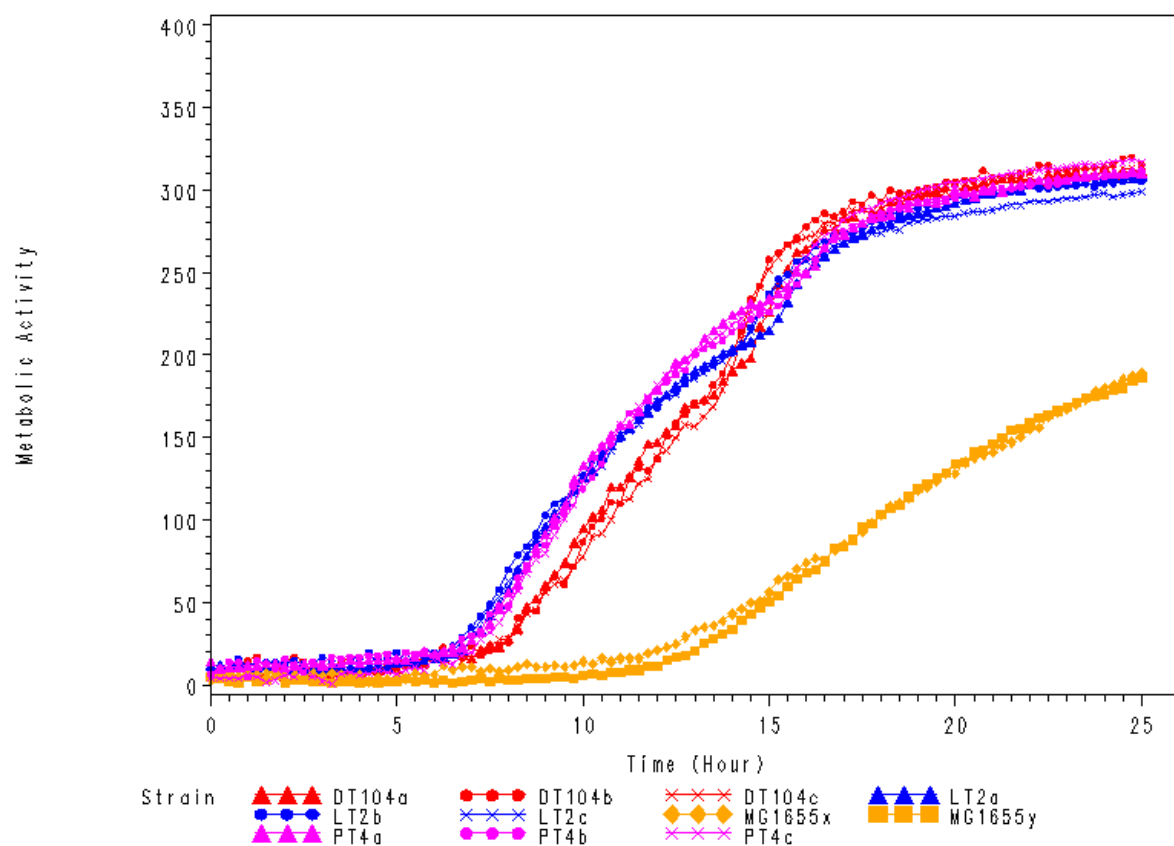

Kinetic Data of Nitrogen Source Utilisation

PM03B, F04 (Cytidine)

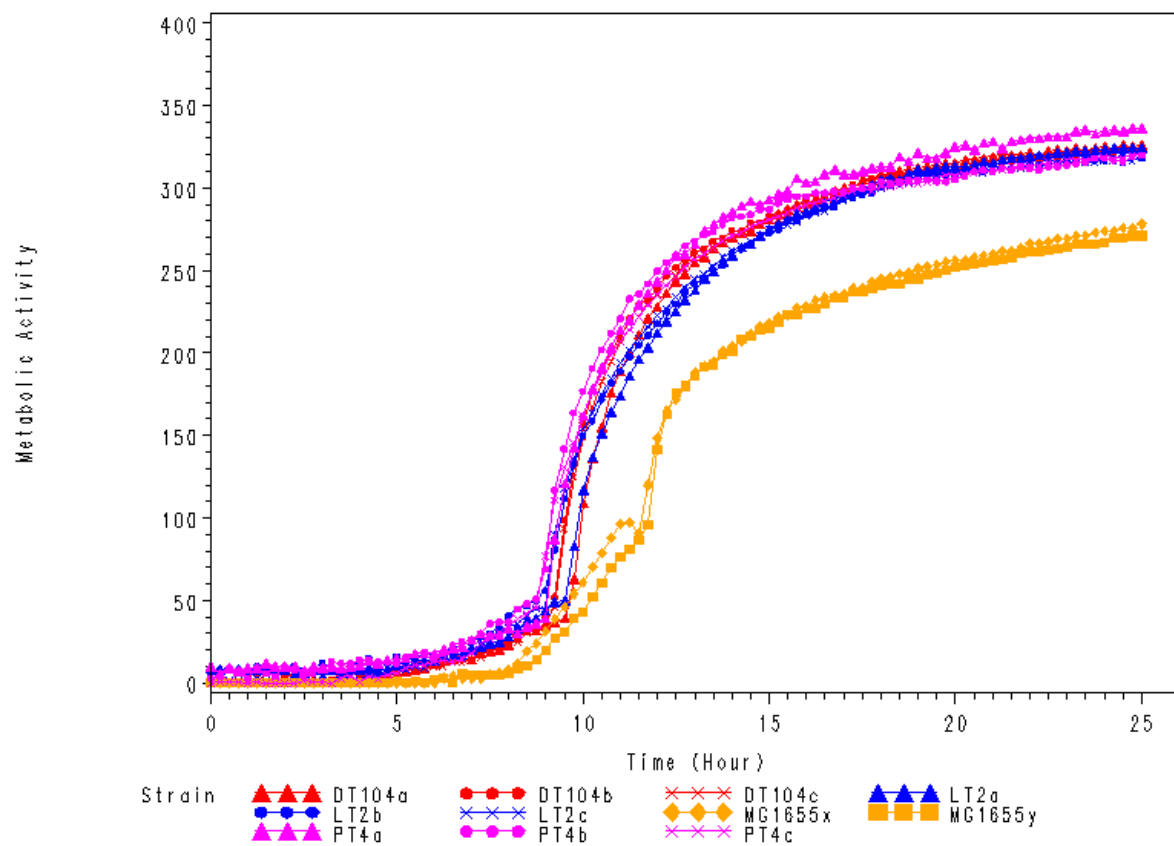

PM03B, F05 (Cytosine)

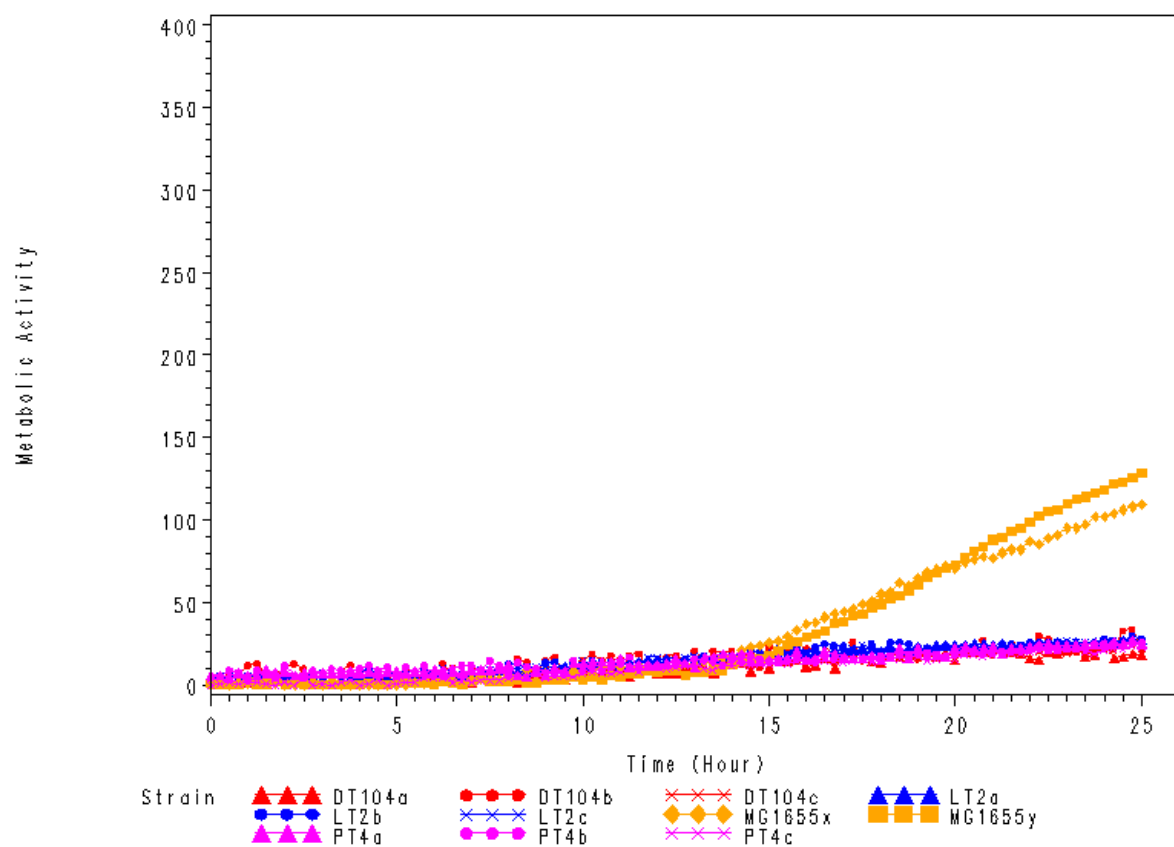

PM03B, F06 (Guanine)

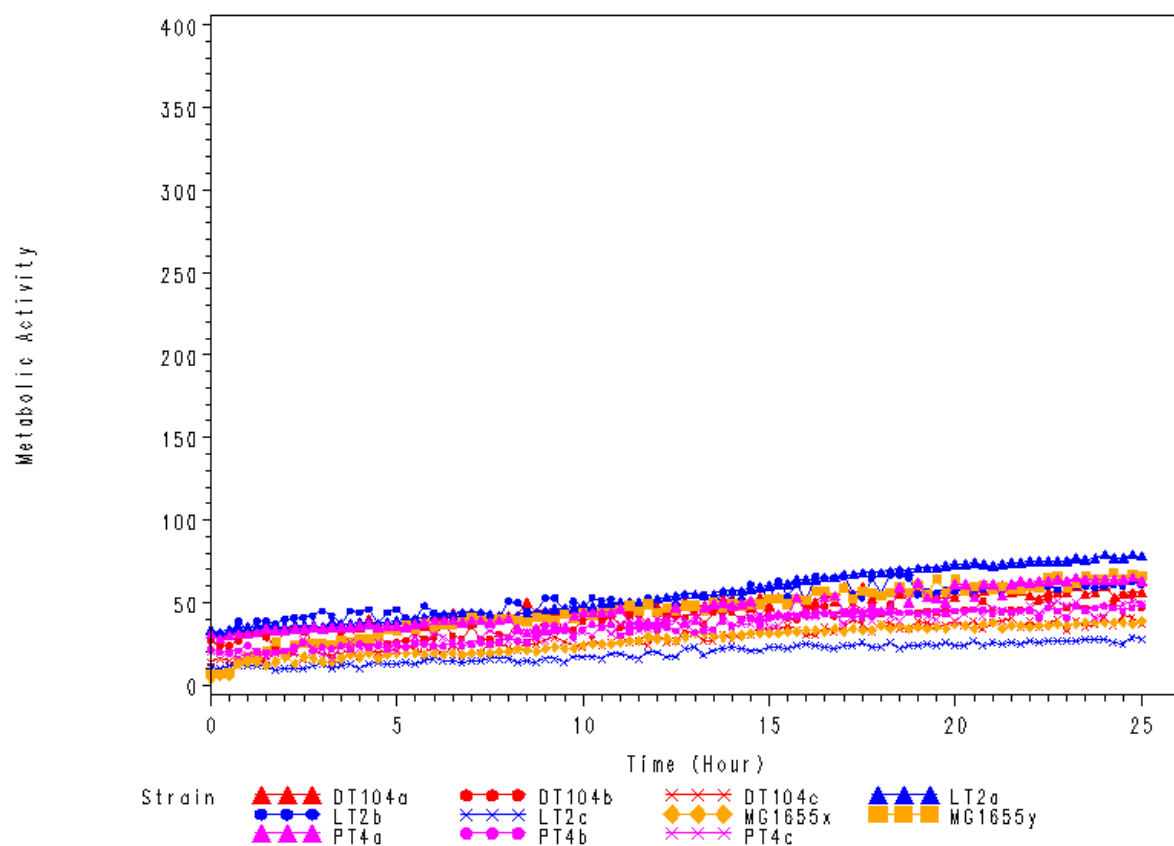

Kinetic Data of Nitrogen Source Utilisation

PM03B, F07 (Guanosine)

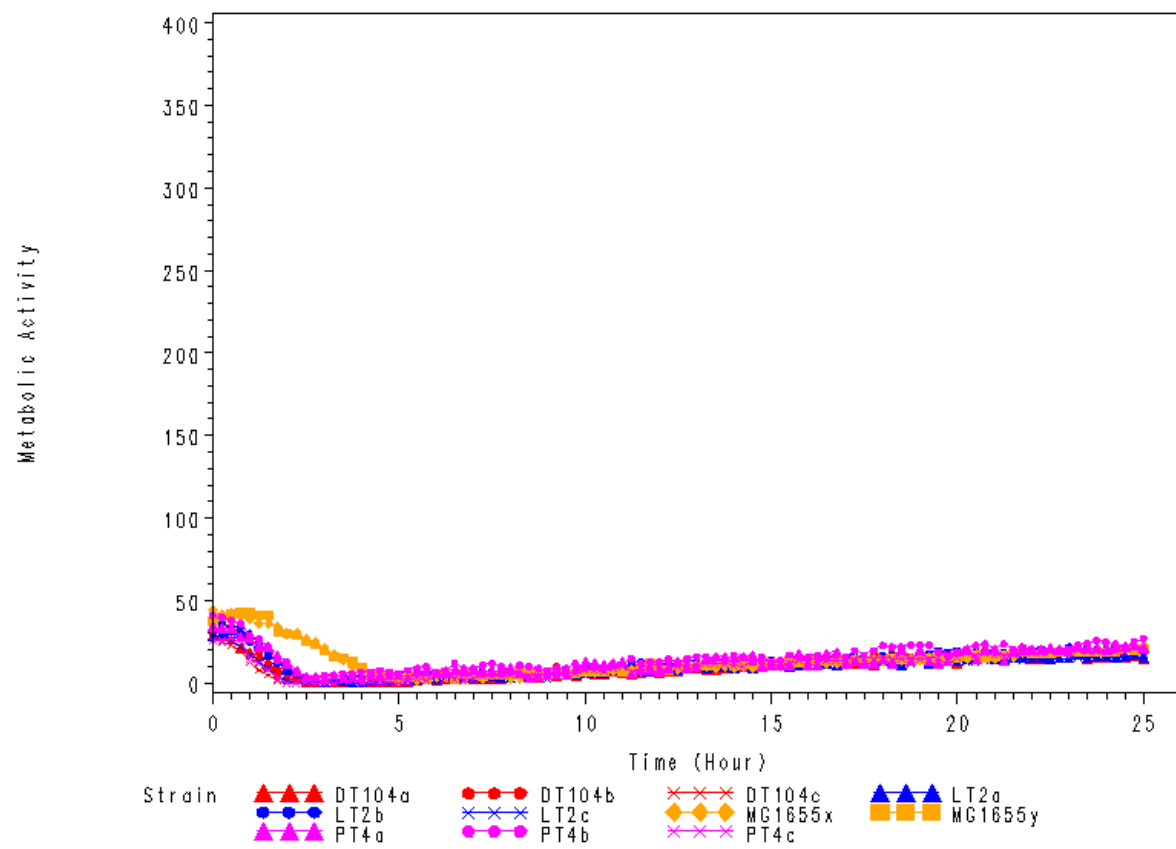

PM03B, F08 (Thymine)

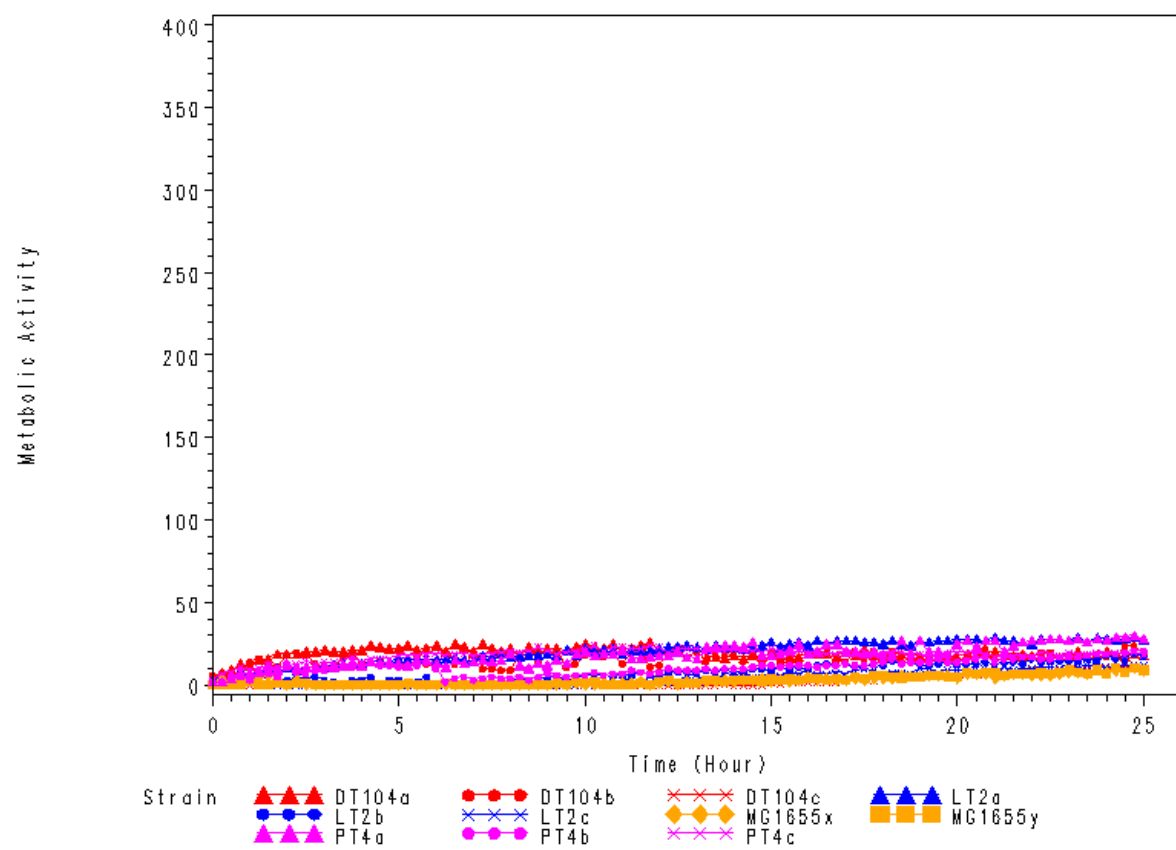

PM03B, F09 (Thymidine)

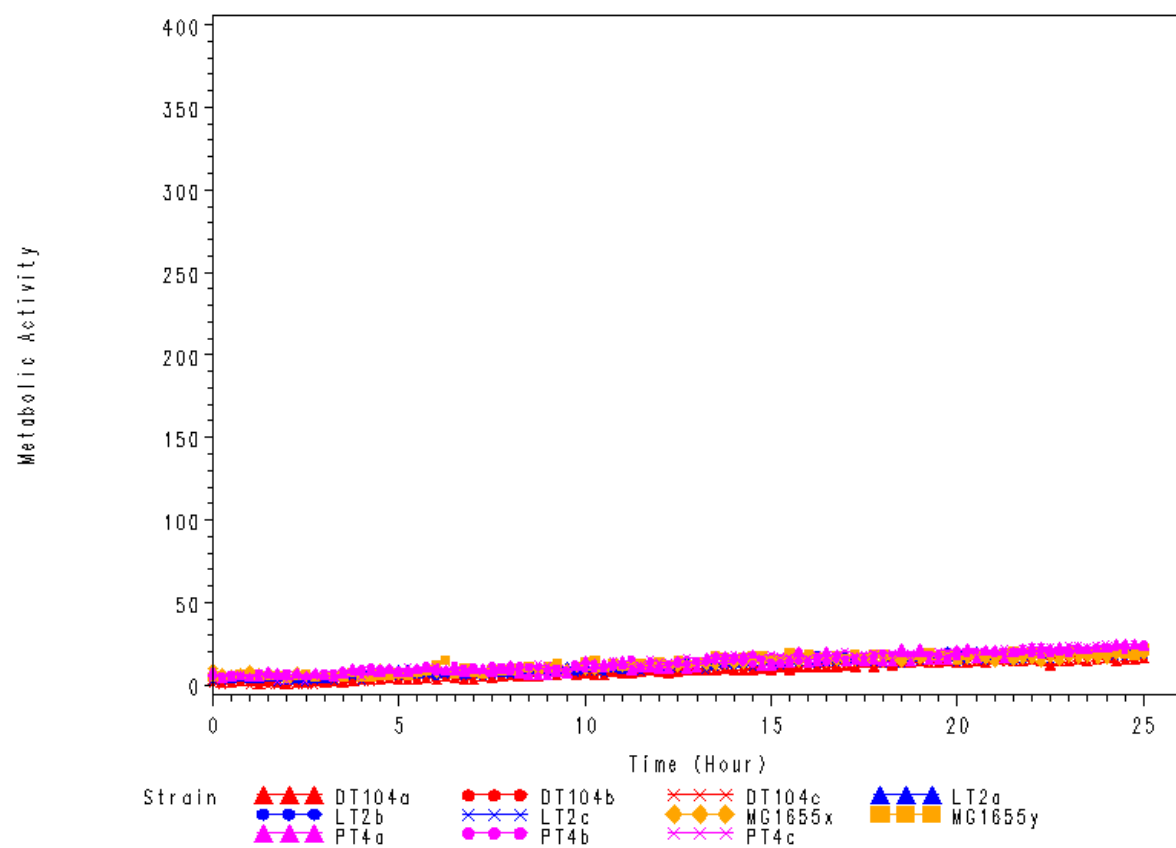

Kinetic Data of Nitrogen Source Utilisation

PM03B, F10 (Uracil)

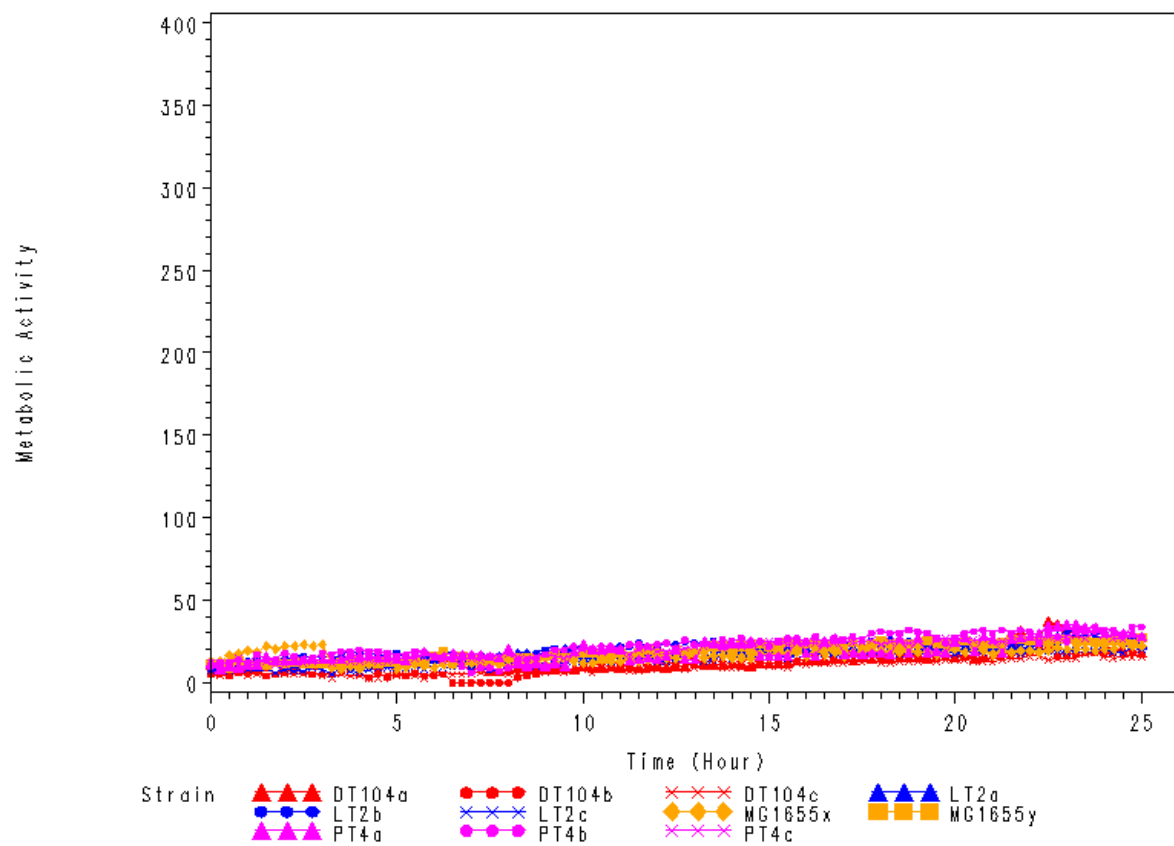

PM03B, F11 (Uridine)

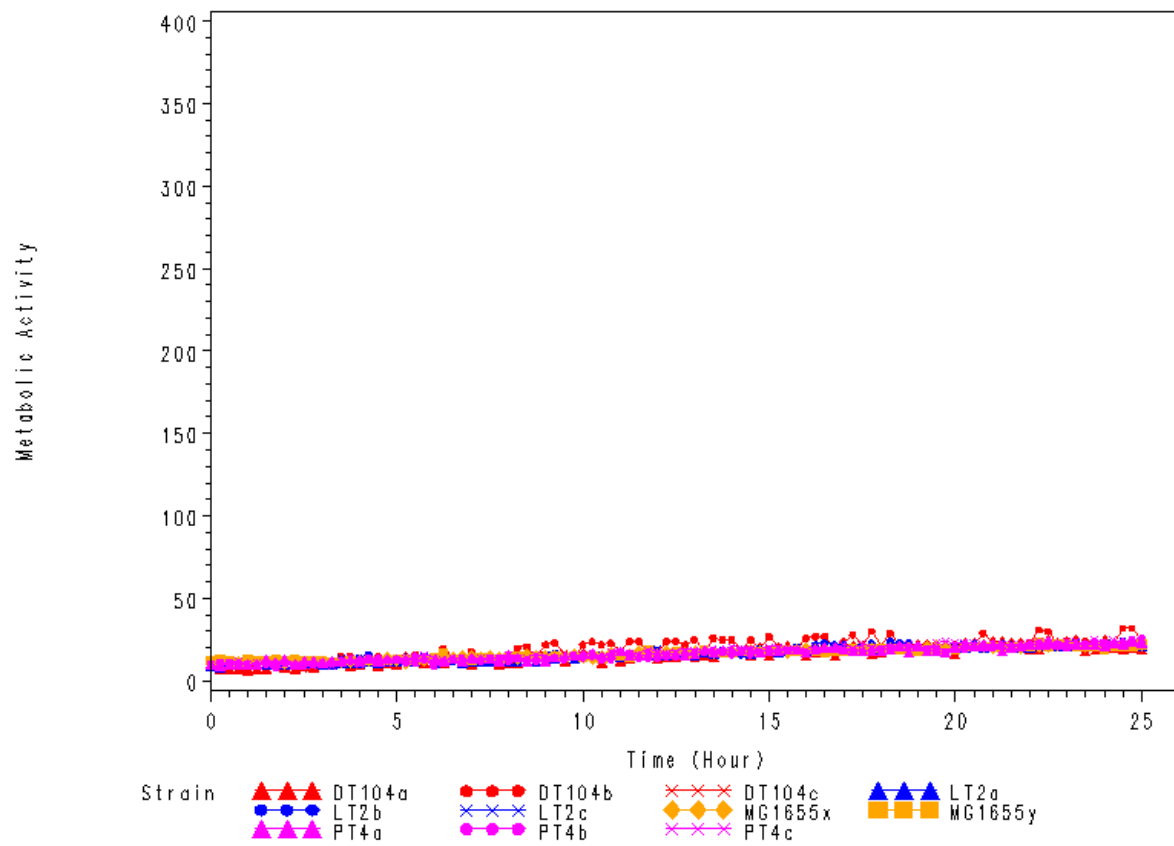

PM03B, F12 (Inosine)

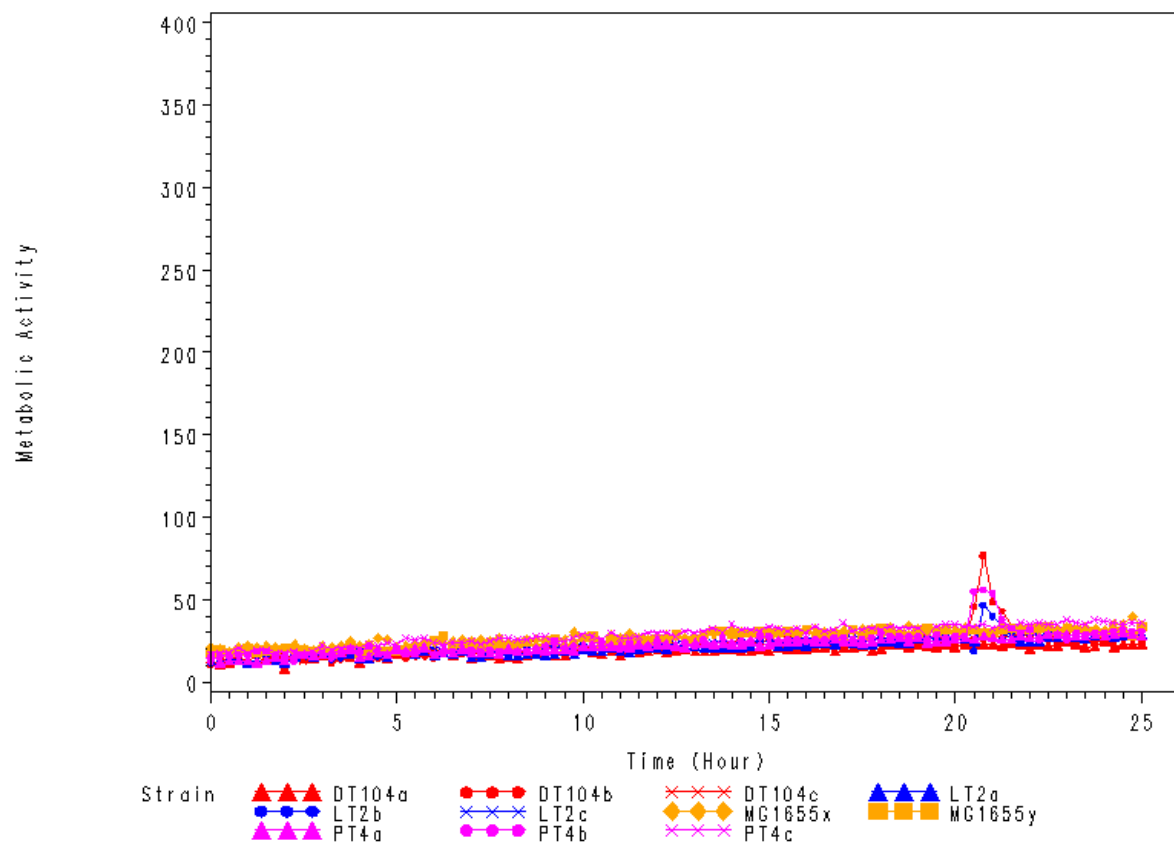



Kinetic Data of Nitrogen Source Utilisation

PM03B, G01 (Xanthine)

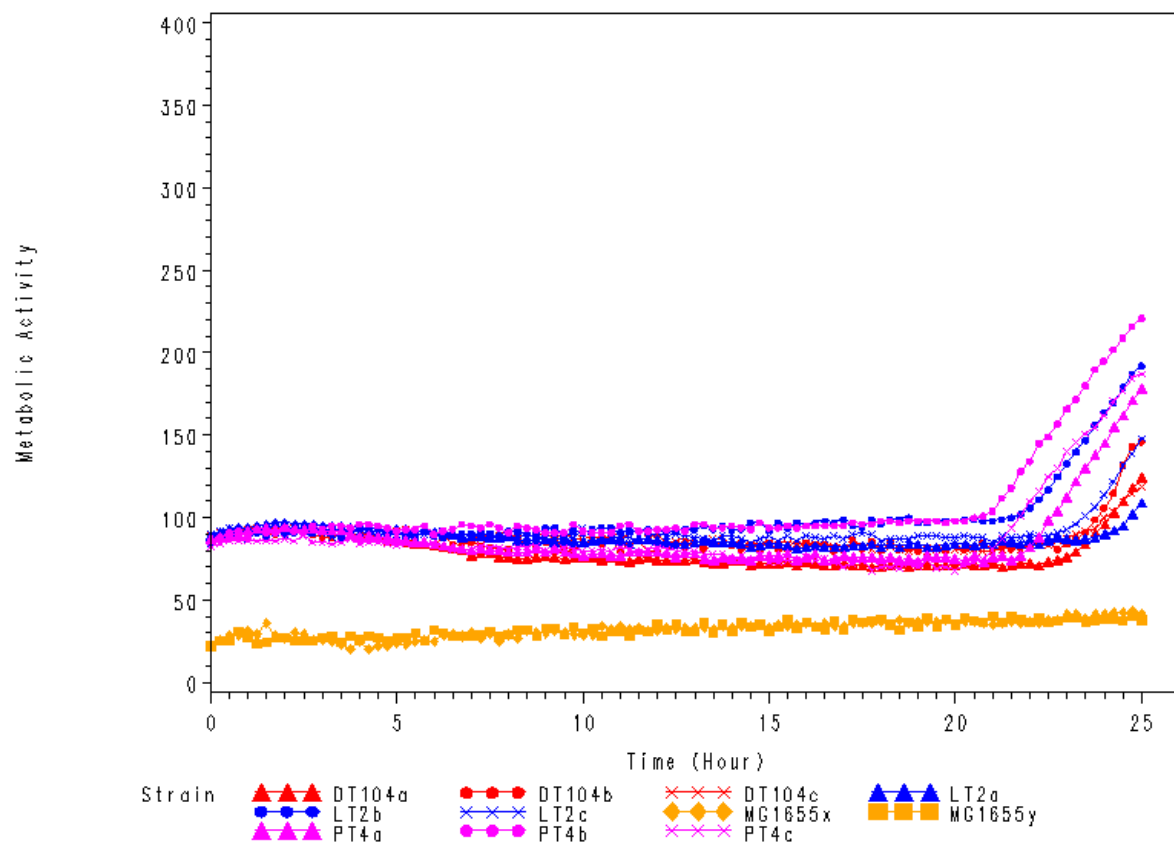

PM03B, G02 (Xanthosine)

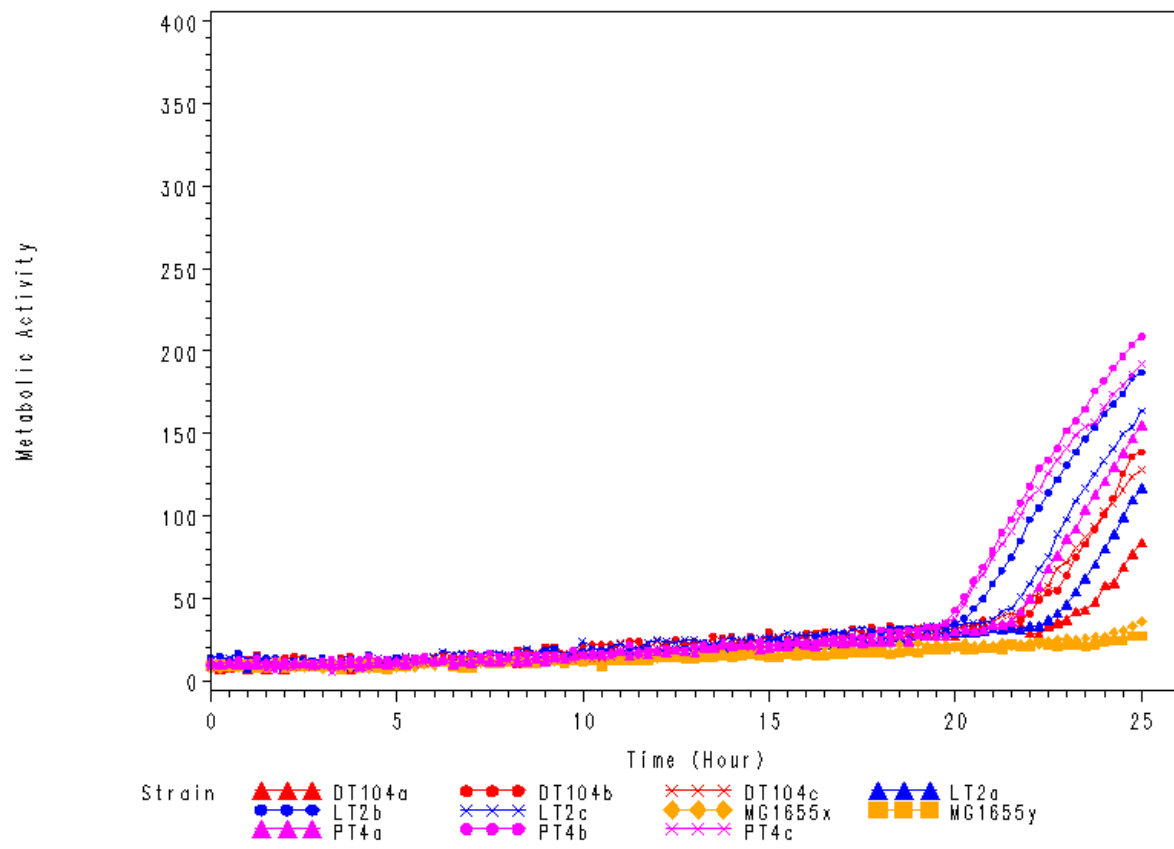

PM03B, G03 (Uric Acid)

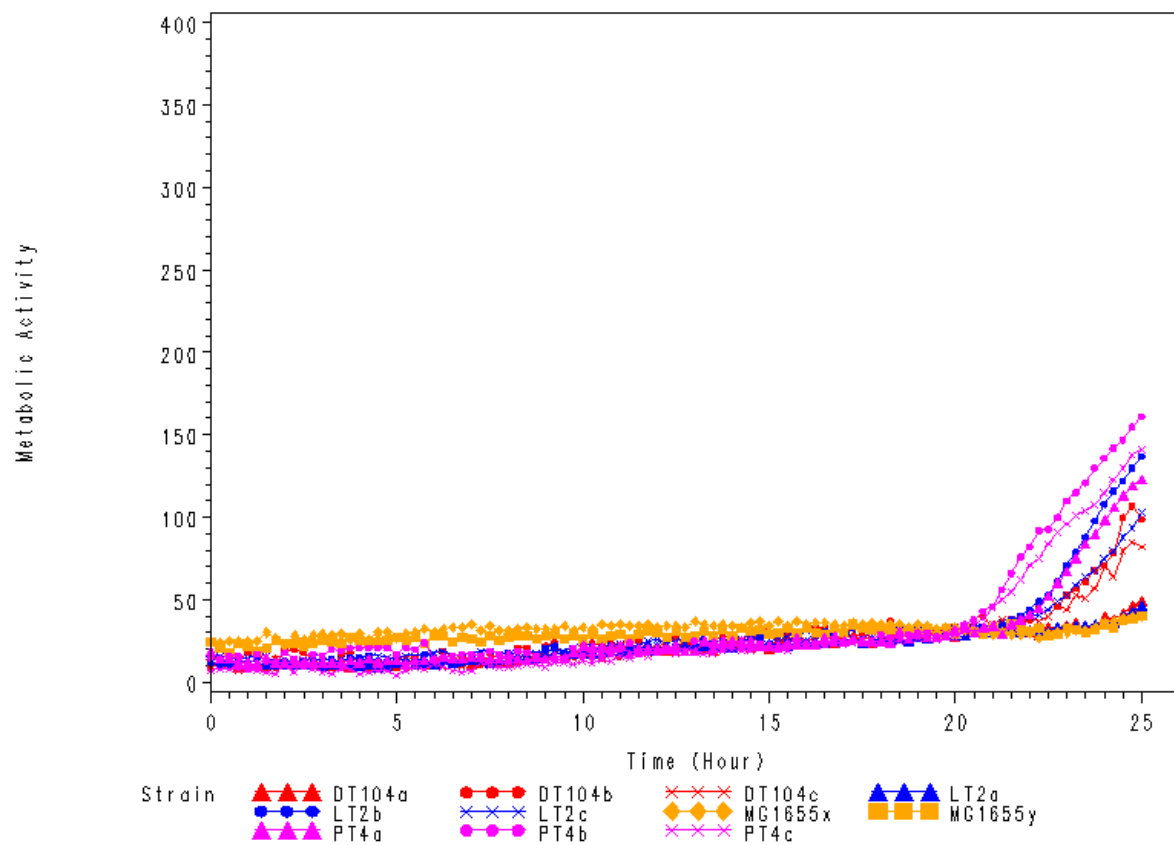

Kinetic Data of Nitrogen Source Utilisation

PM03B, G04 (Alloxan)

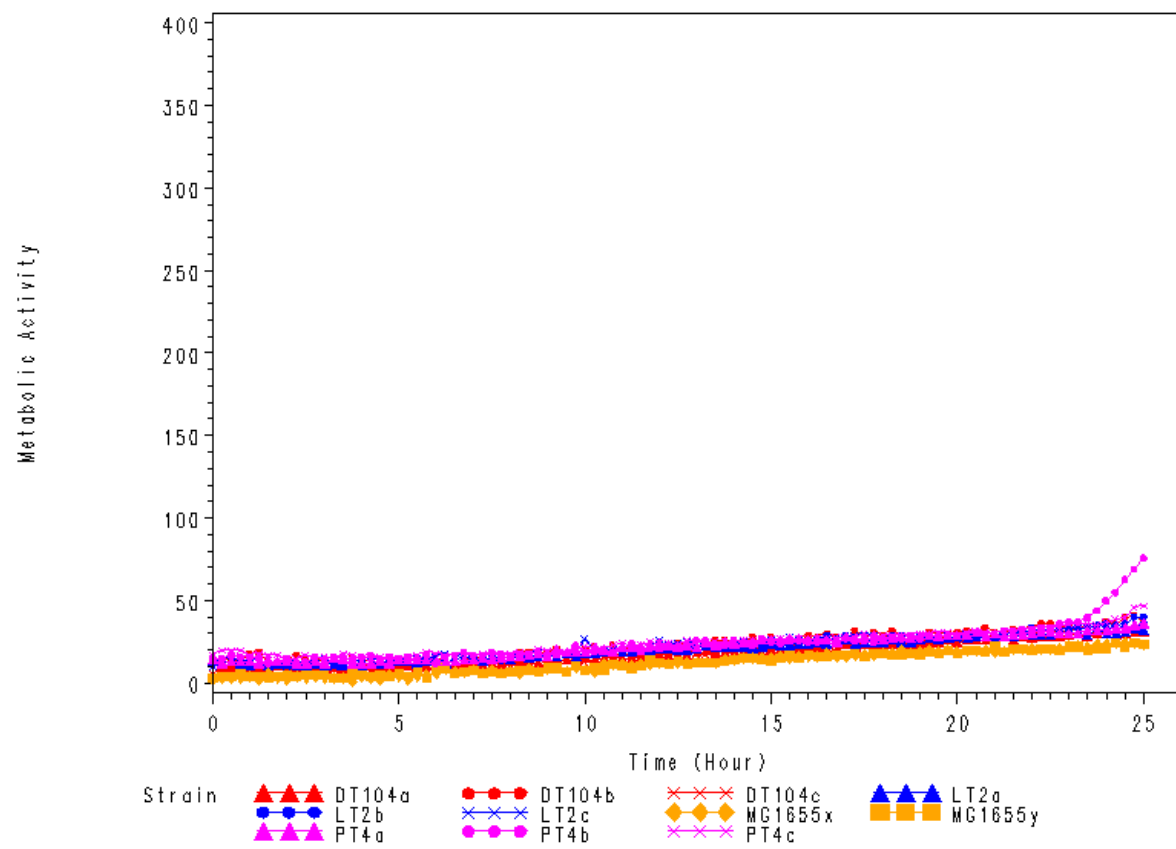

PM03B, G05 (Allantoin)

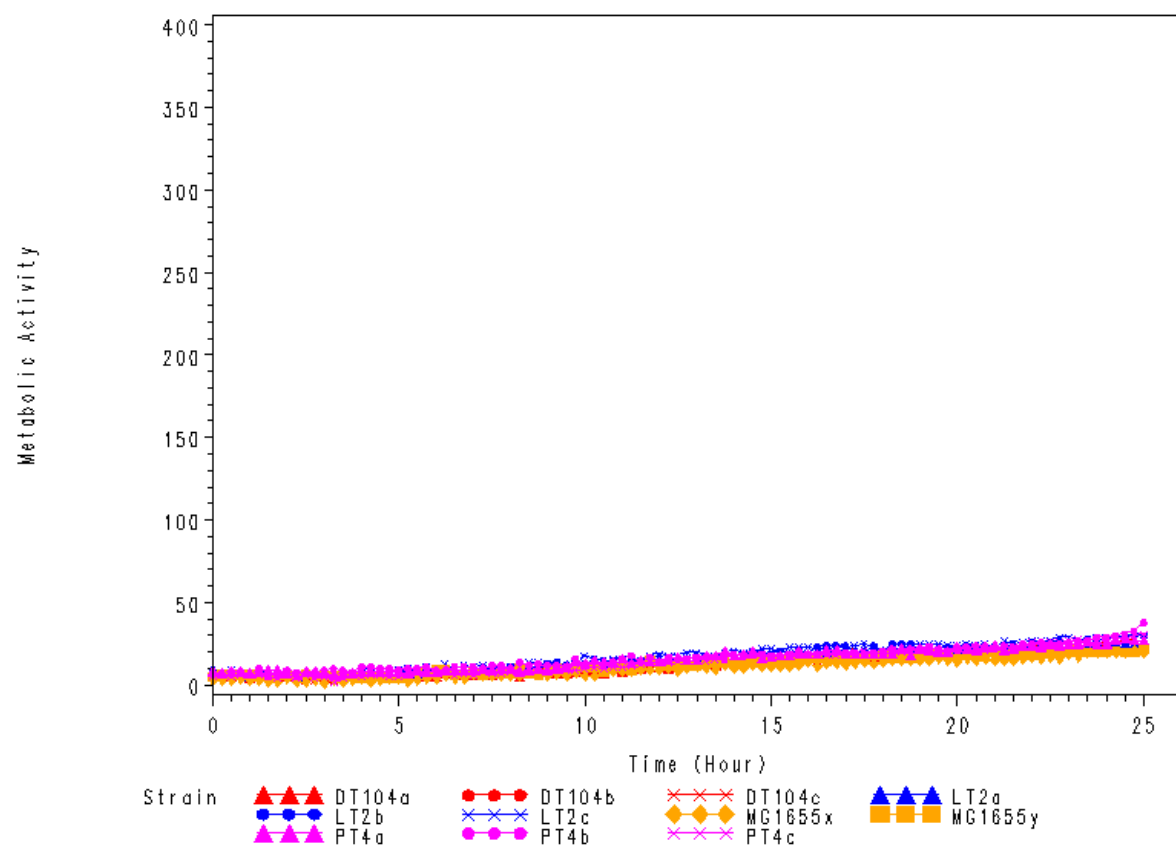

PM03B, G06 (Parabanic Acid)

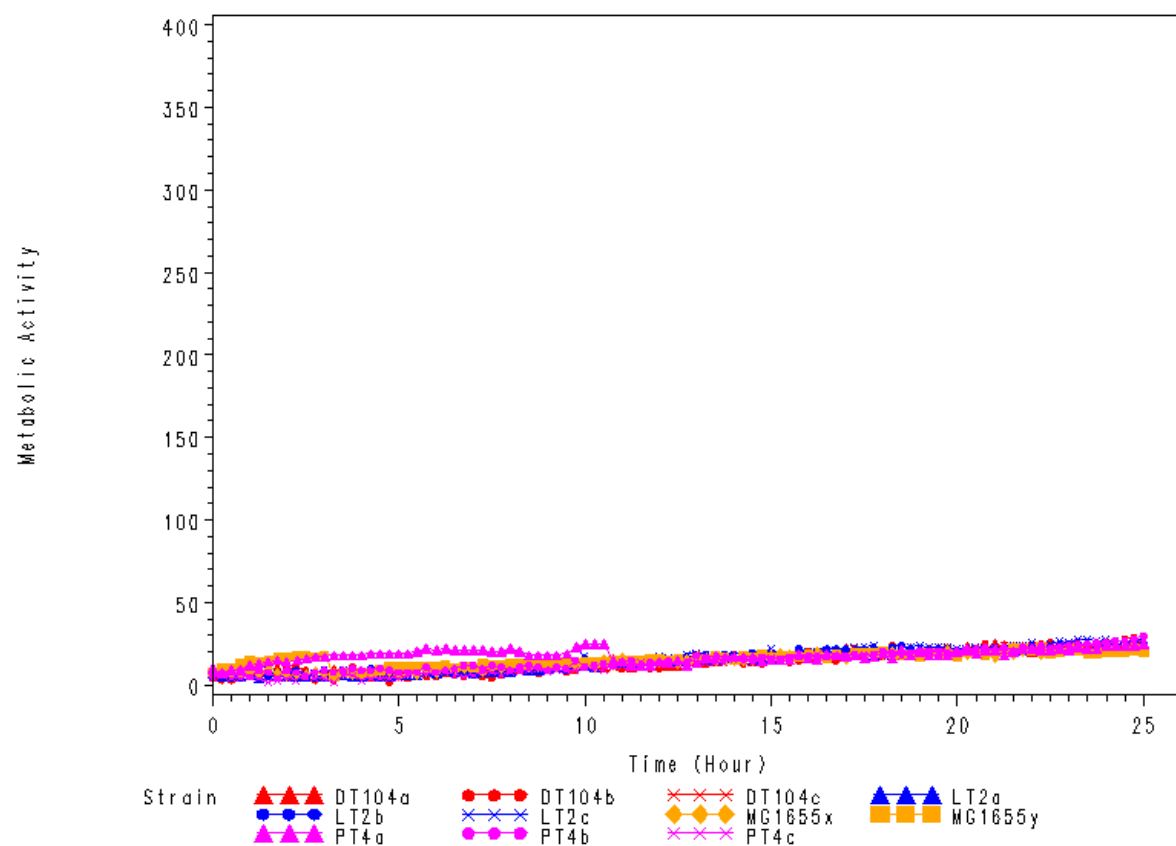

Kinetic Data of Nitrogen Source Utilisation

PM03B, G07 (D,L- $\alpha$ -Amino-N-Butyric Acid)

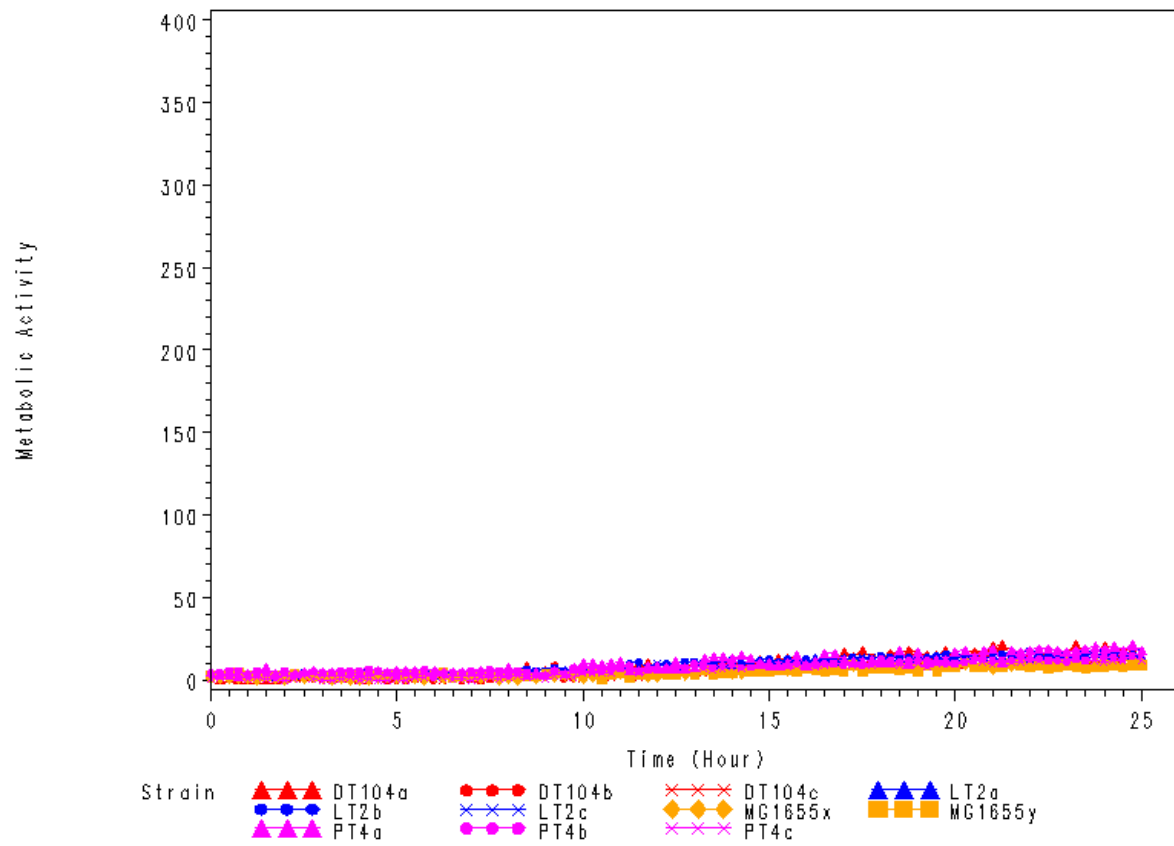

PM03B, G08 (g-Amino-N-Butyric Acid)

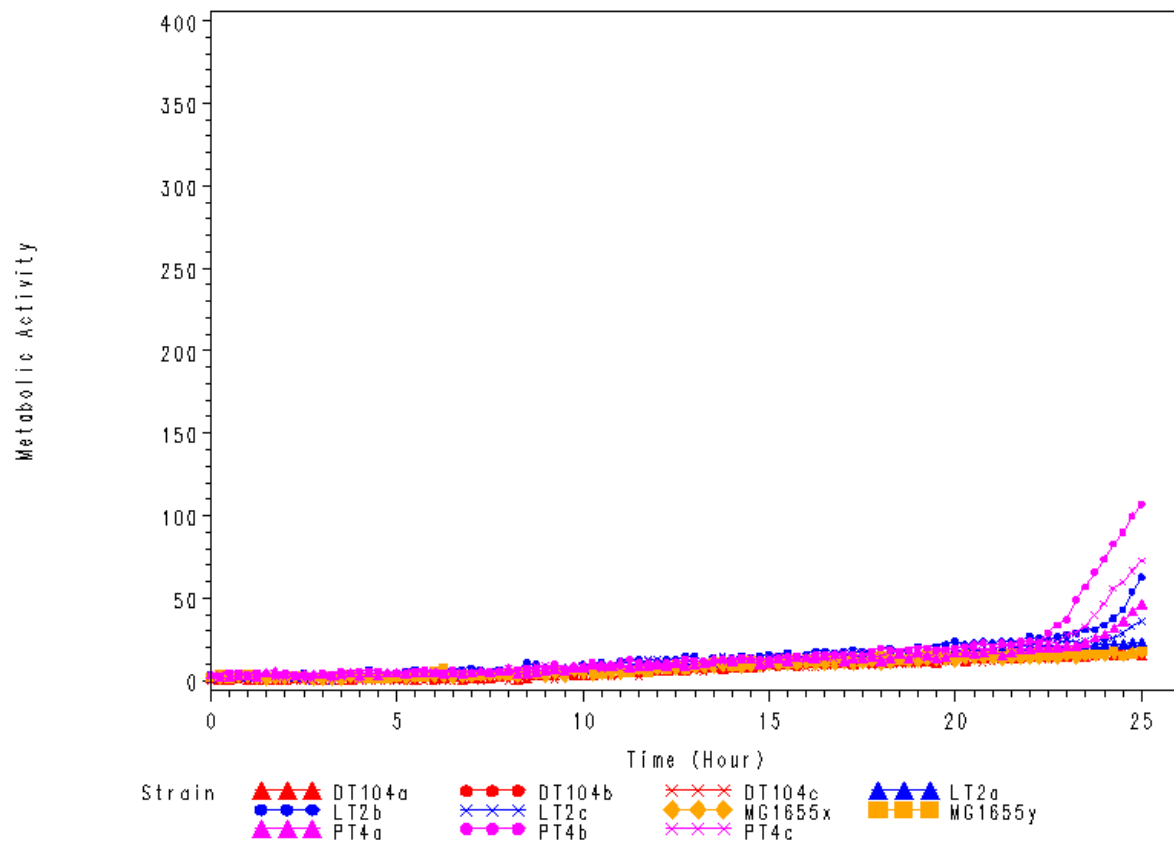

PM03B, G09 (e-Amino-N-Caproic Acid)

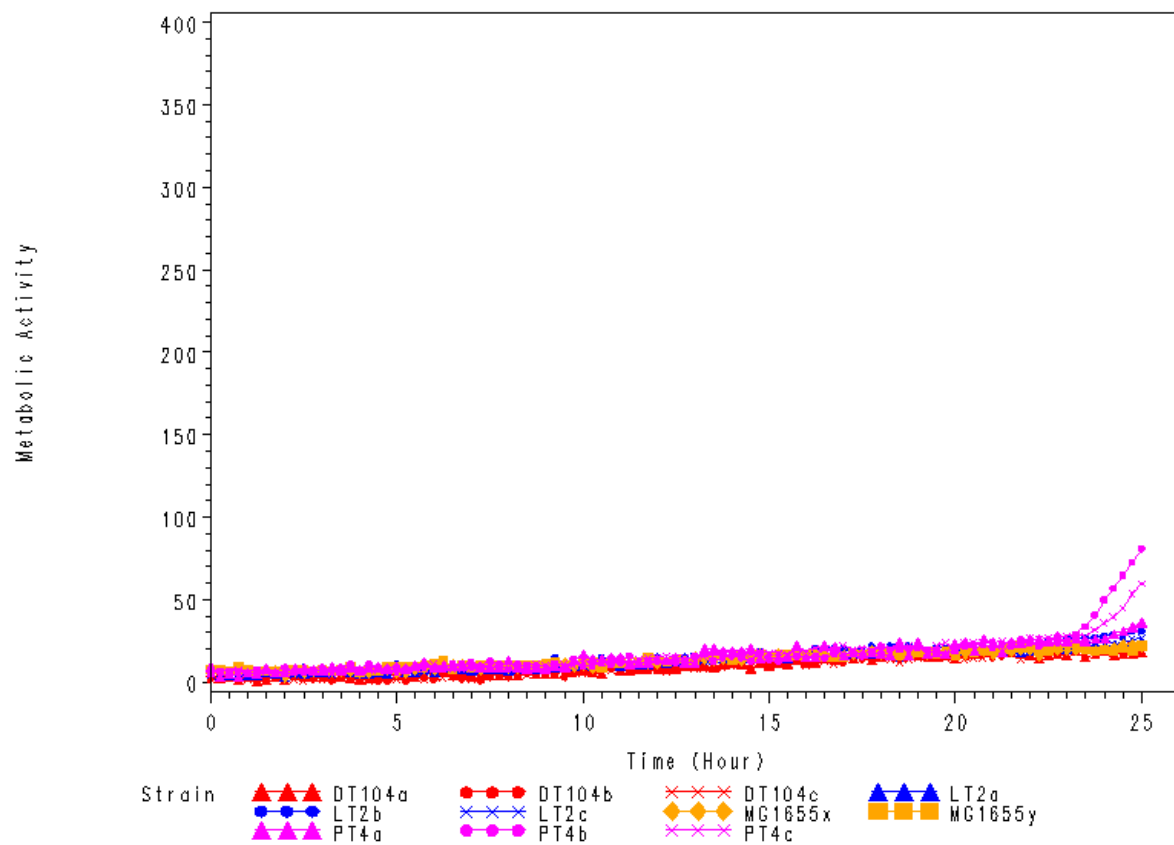

Kinetic Data of Nitrogen Source Utilisation

PM03B, G10 (D,L- $\alpha$ -Amino-Caprylic Acid)

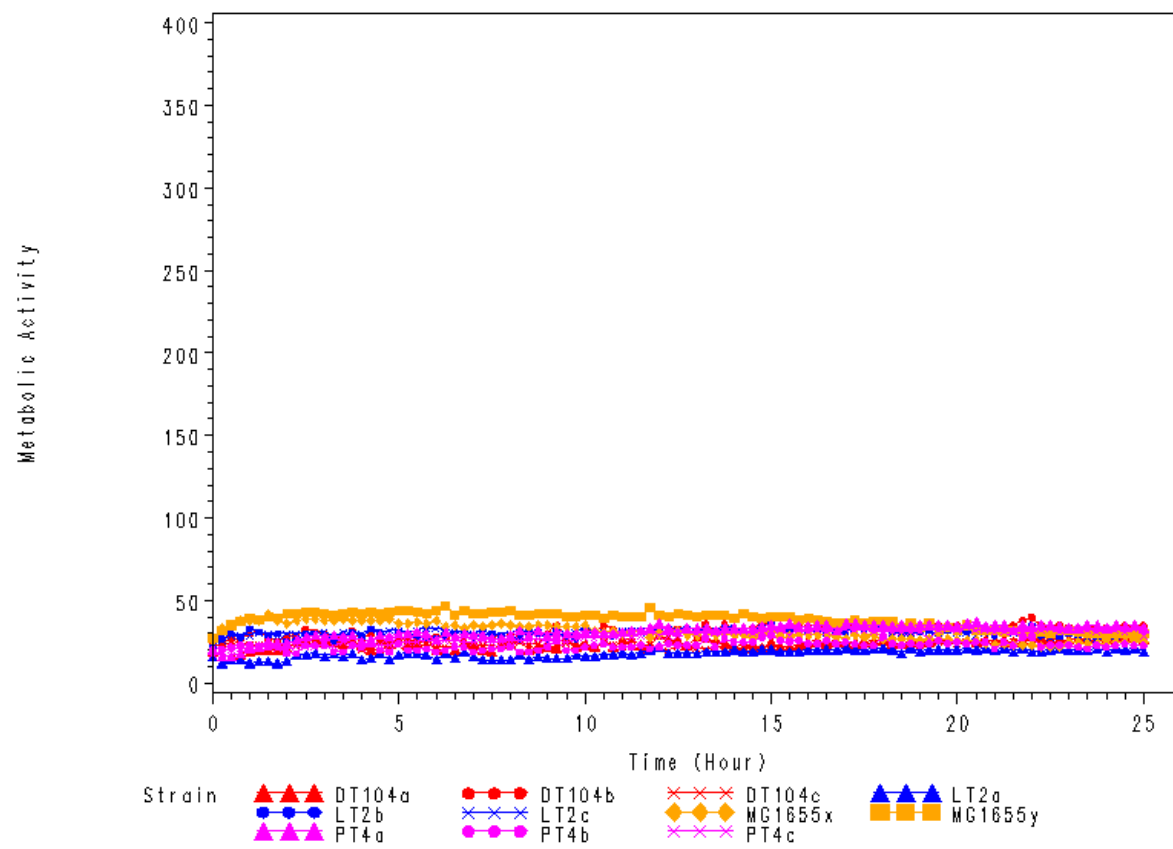

PM03B, G11 (d-Amino-N-Valeric Acid)

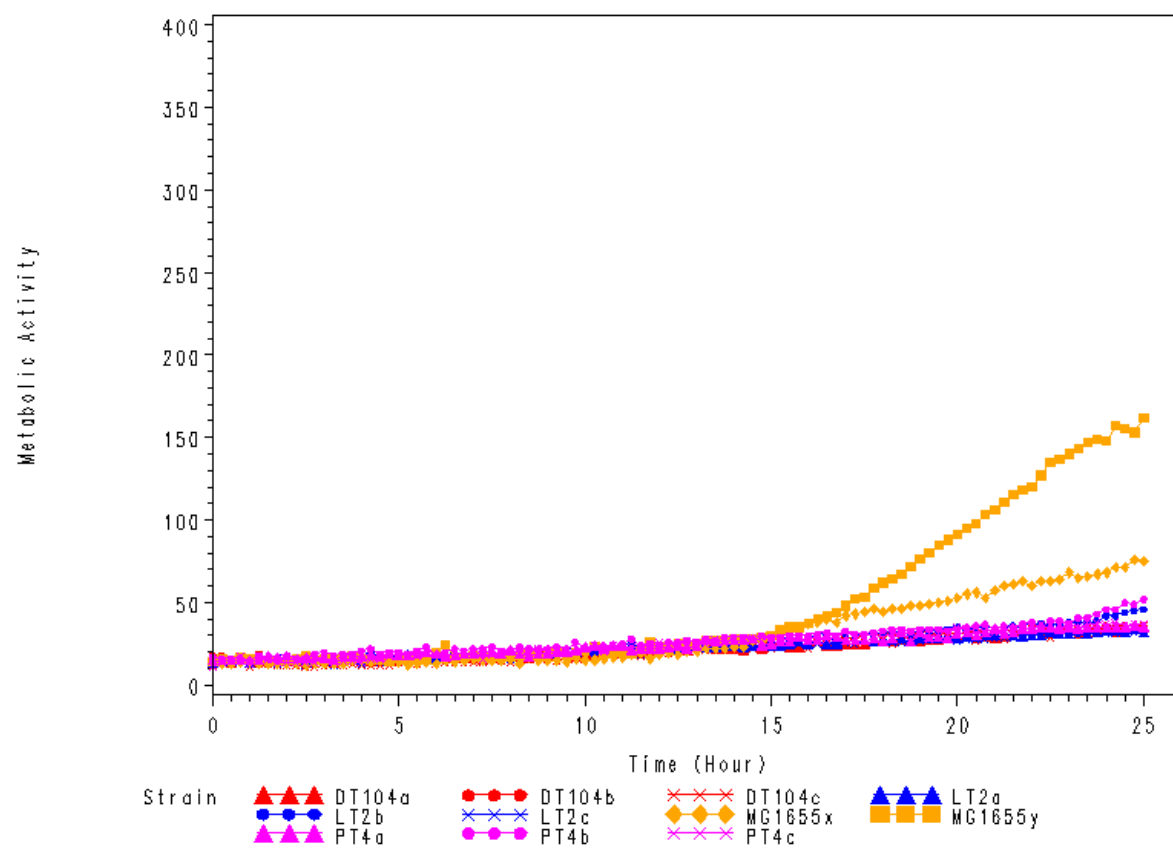

PM03B, G12 ( $\alpha$ -Amino-N-Valeric Acid)

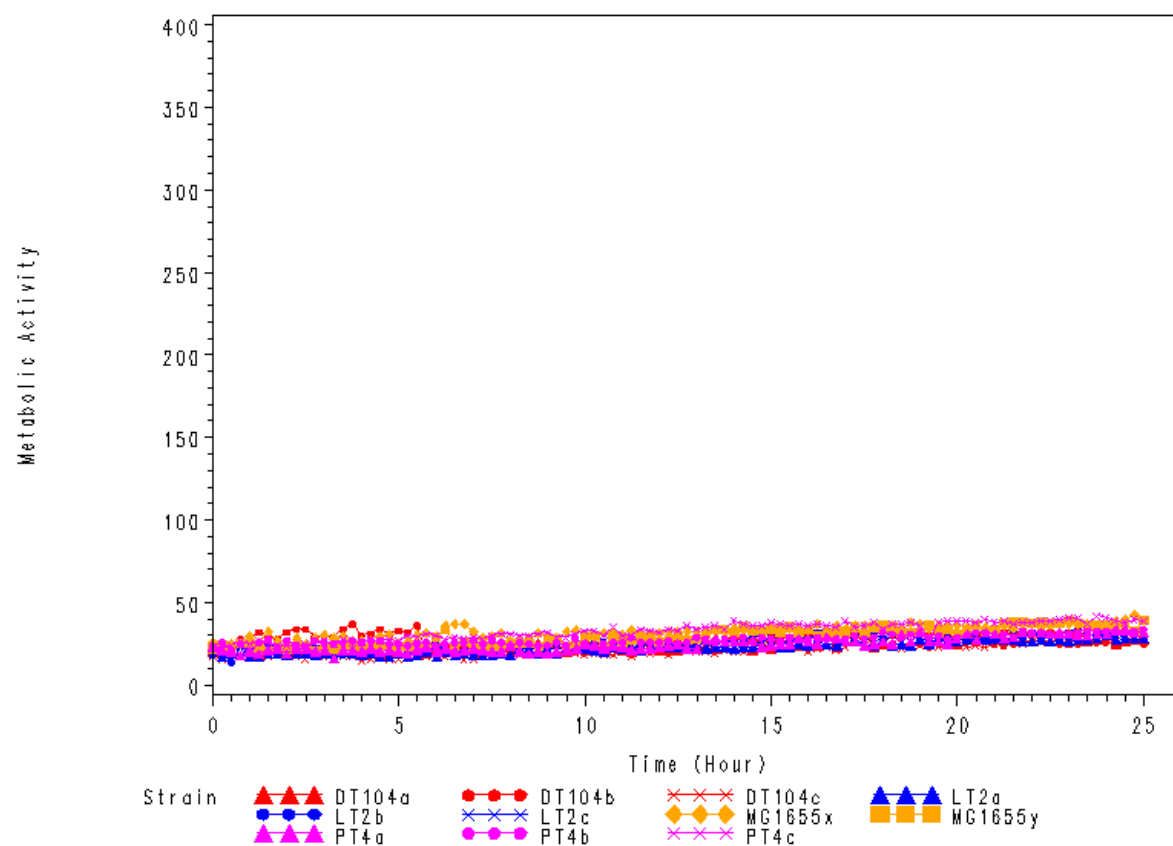

Kinetic Data of Nitrogen Source Utilisation

PM03B, H01 (Ala-Asp)

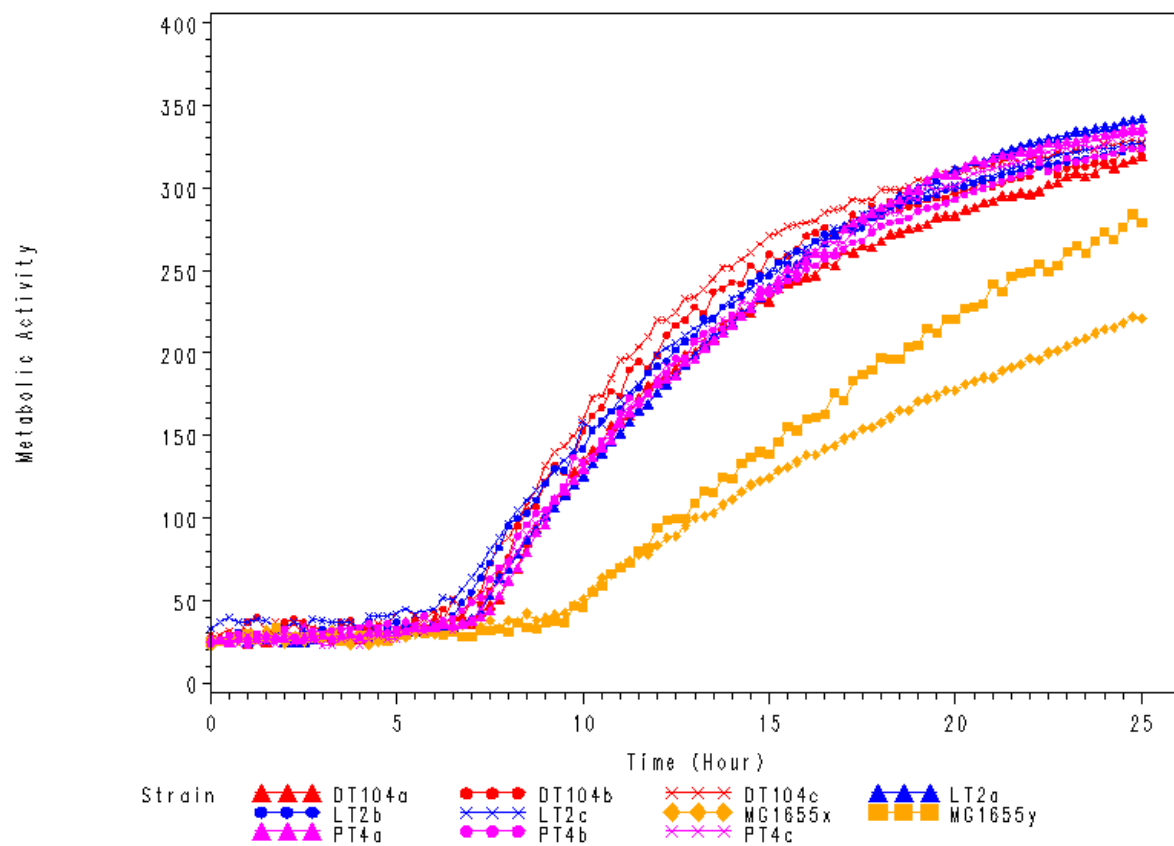

PM03B, H02 (Ala-Gln)

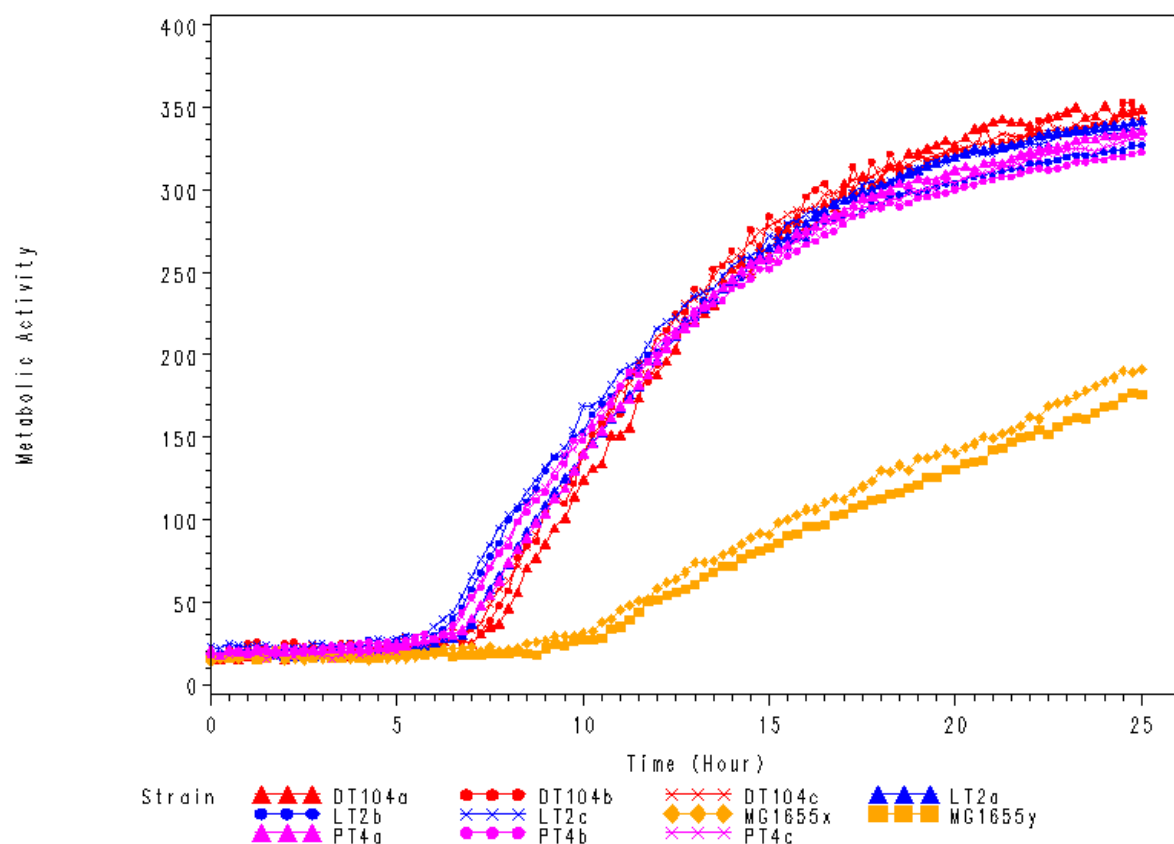

PM03B, H03 (Ala-Glu)

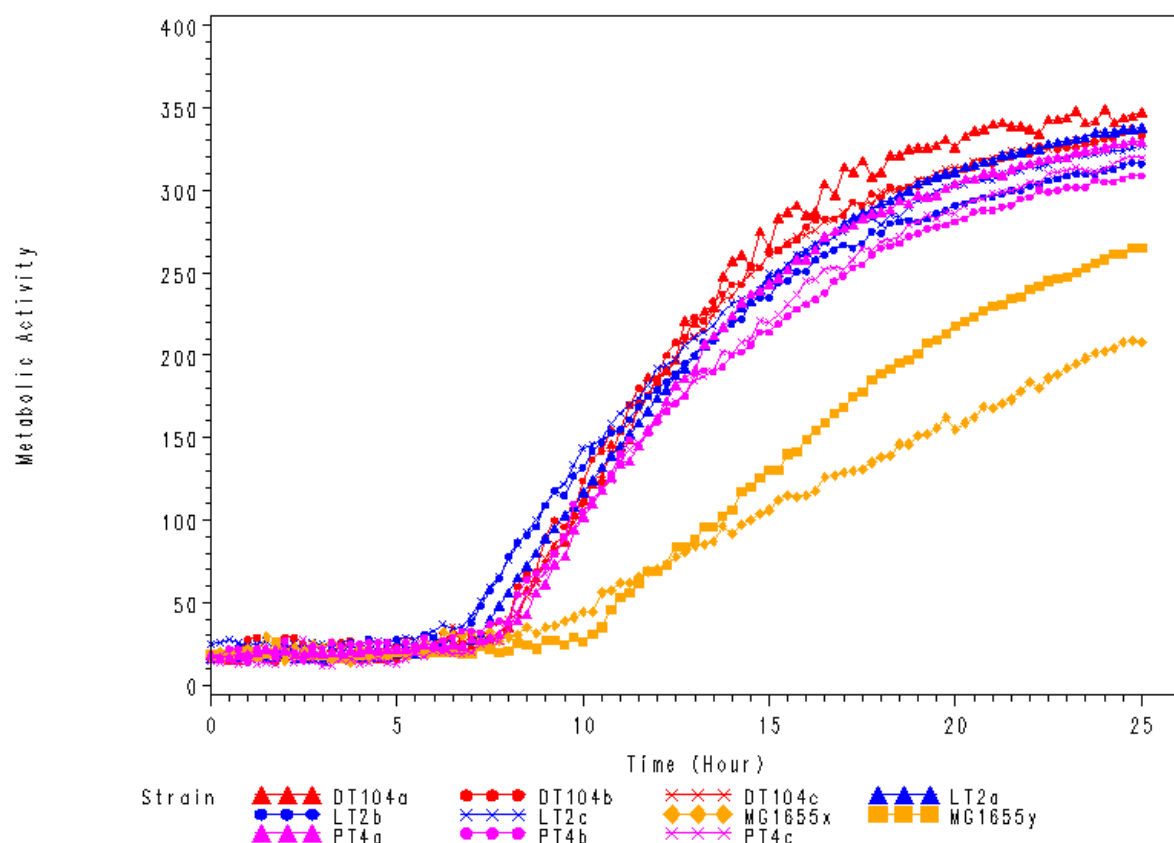

Kinetic Data of Nitrogen Source Utilisation

PM03B, H04 (Ala—Gly)

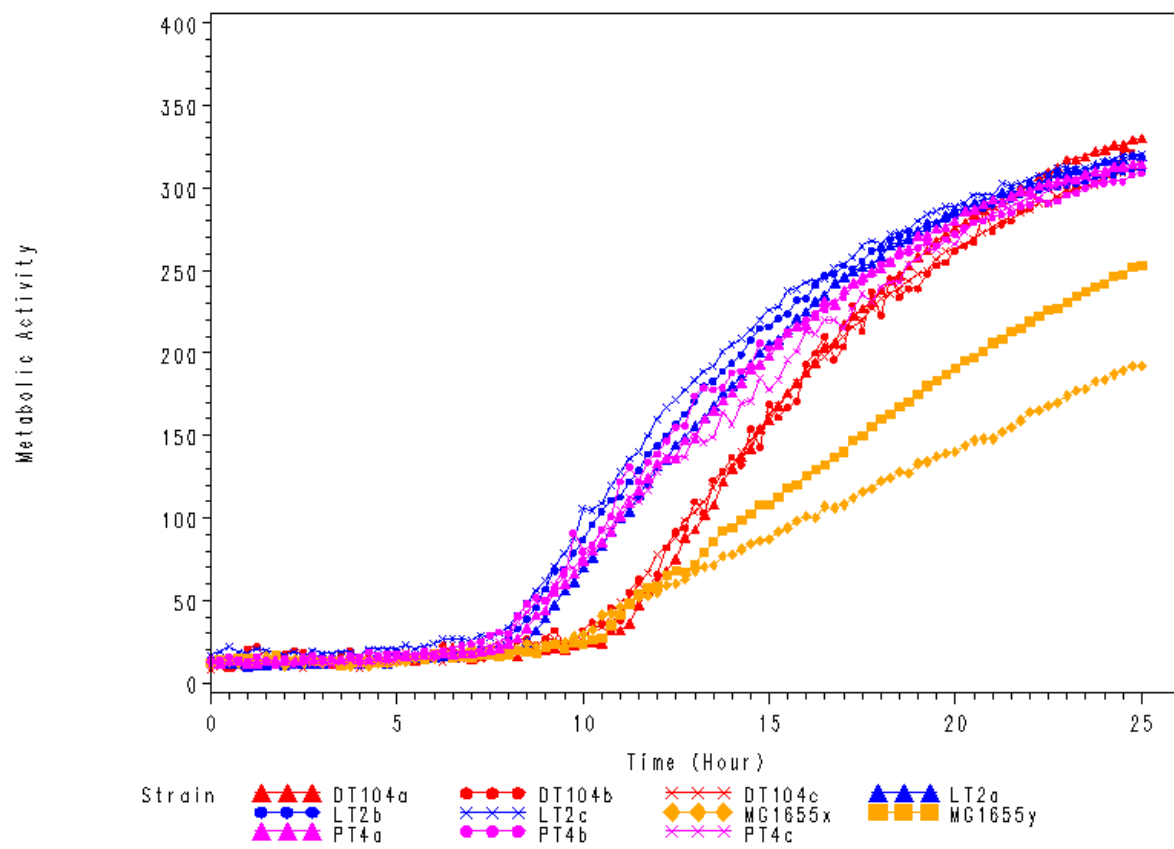

PM03B, H05 (Ala—His)

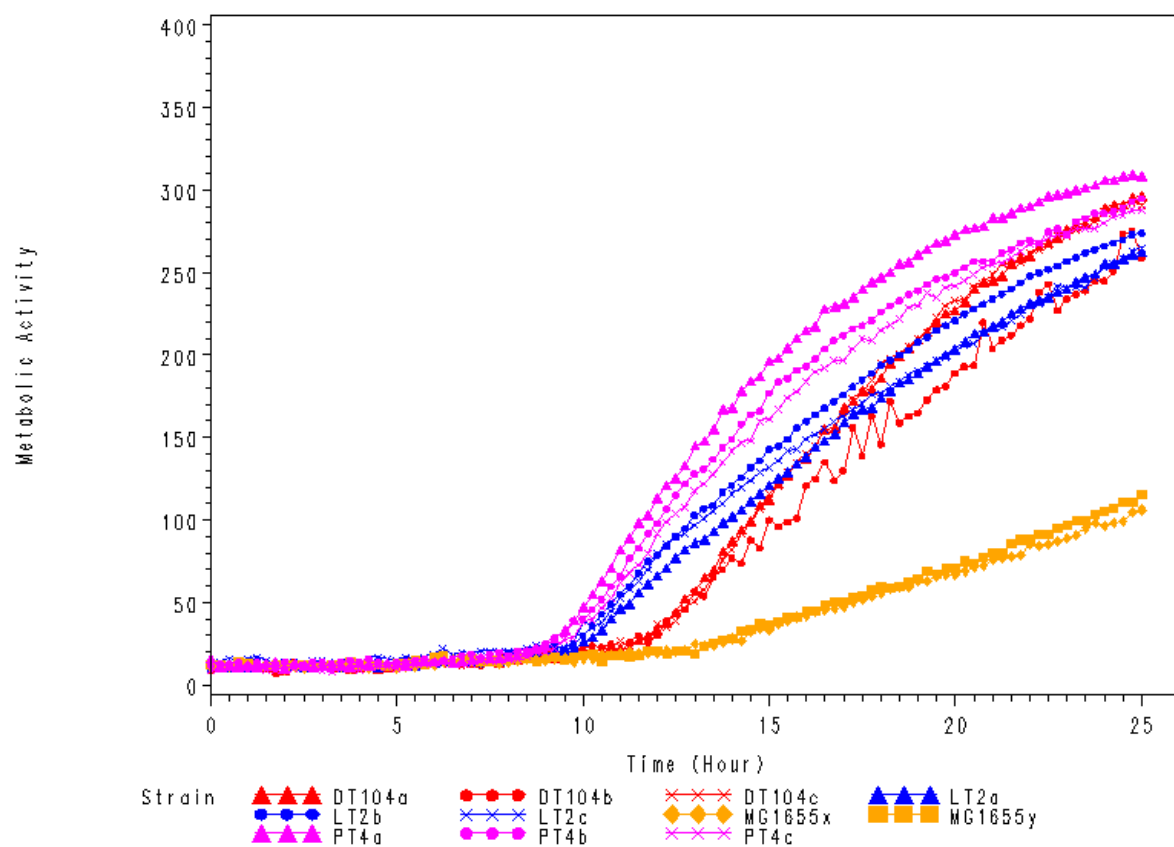

PM03B, H06 (Ala—Leu)

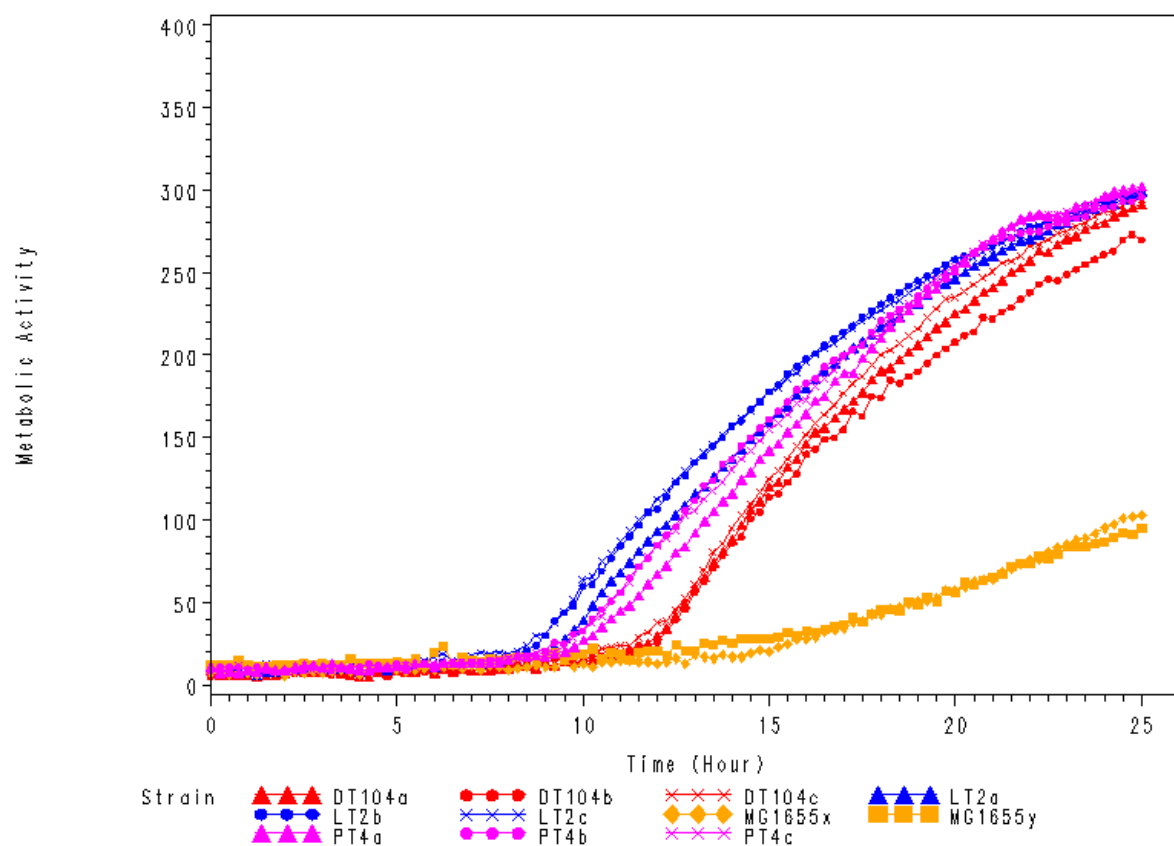

Kinetic Data of Nitrogen Source Utilisation

PM03B, H07 (Ala—Thr)

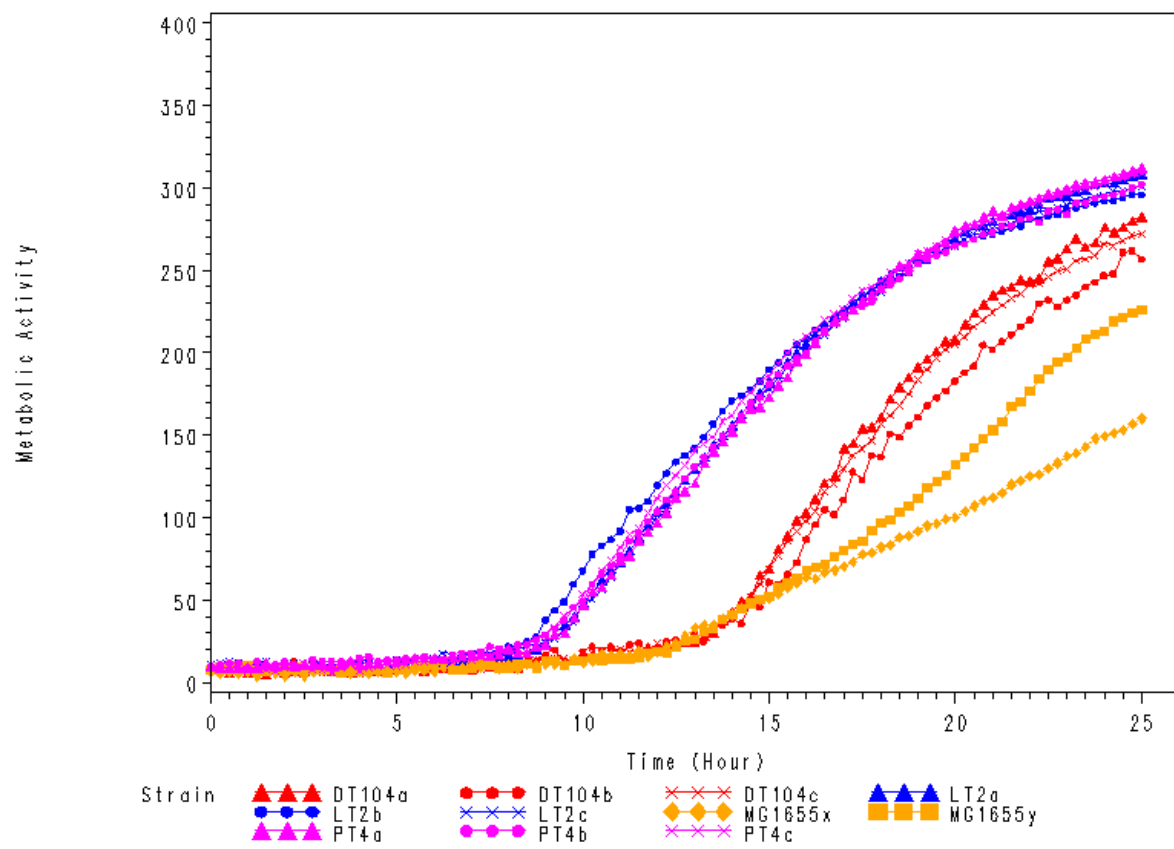

PM03B, H08 (Gly—Asn)

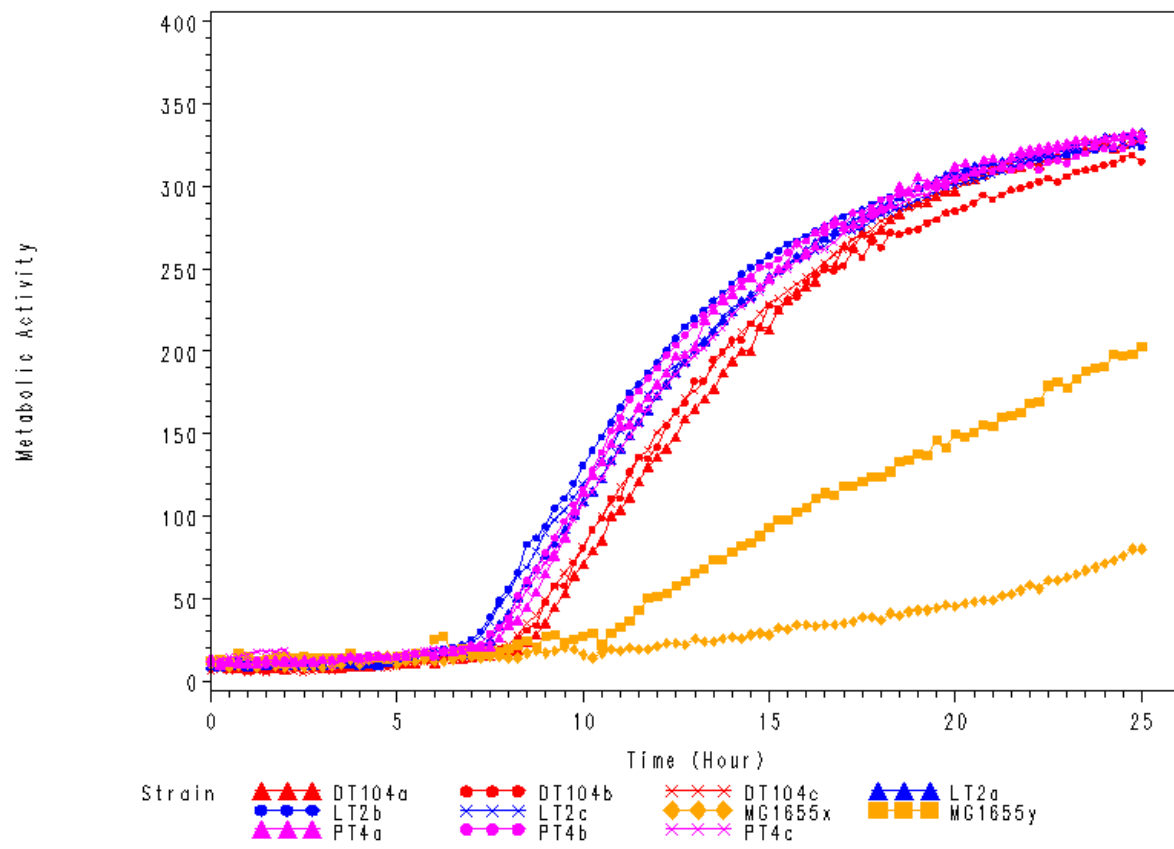

PM03B, H09 (Gly—Gln)

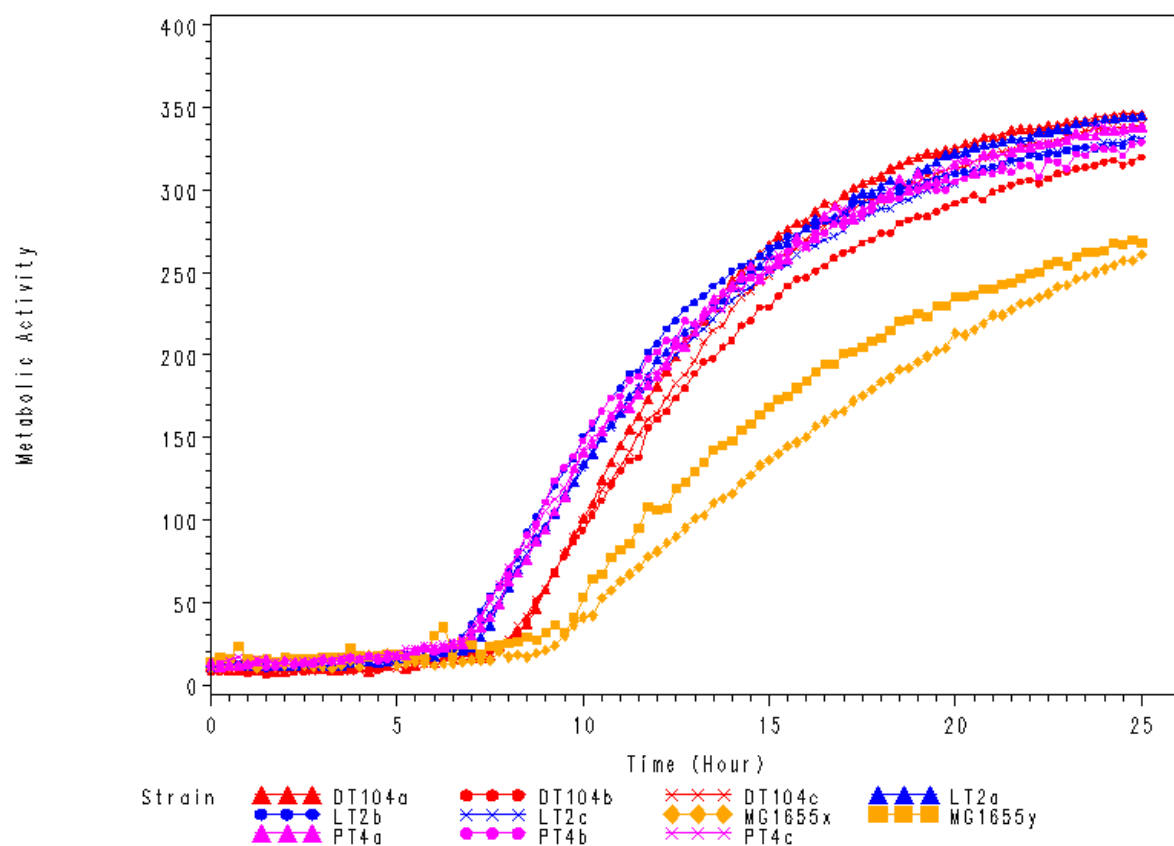

Kinetic Data of Nitrogen Source Utilisation

PM03B, H10 (Gly—Glu)

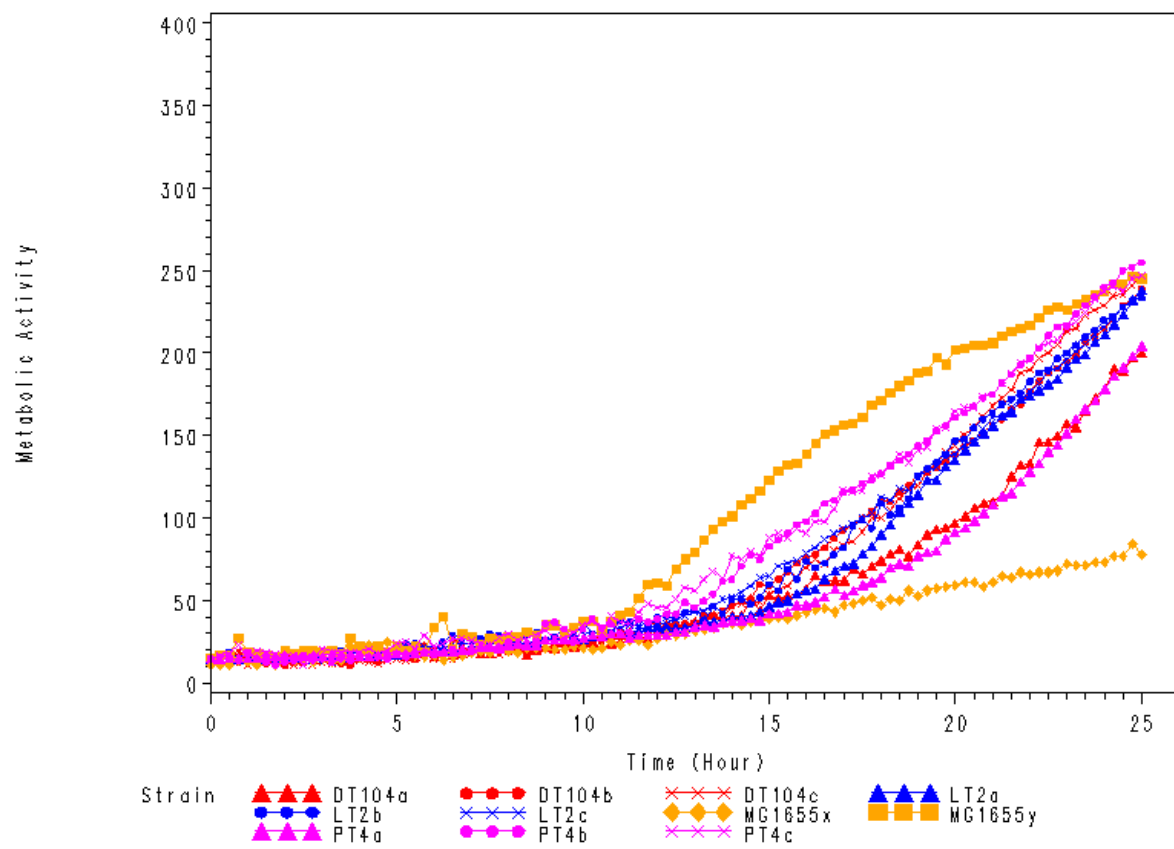

PM03B, H11 (Gly—Met)

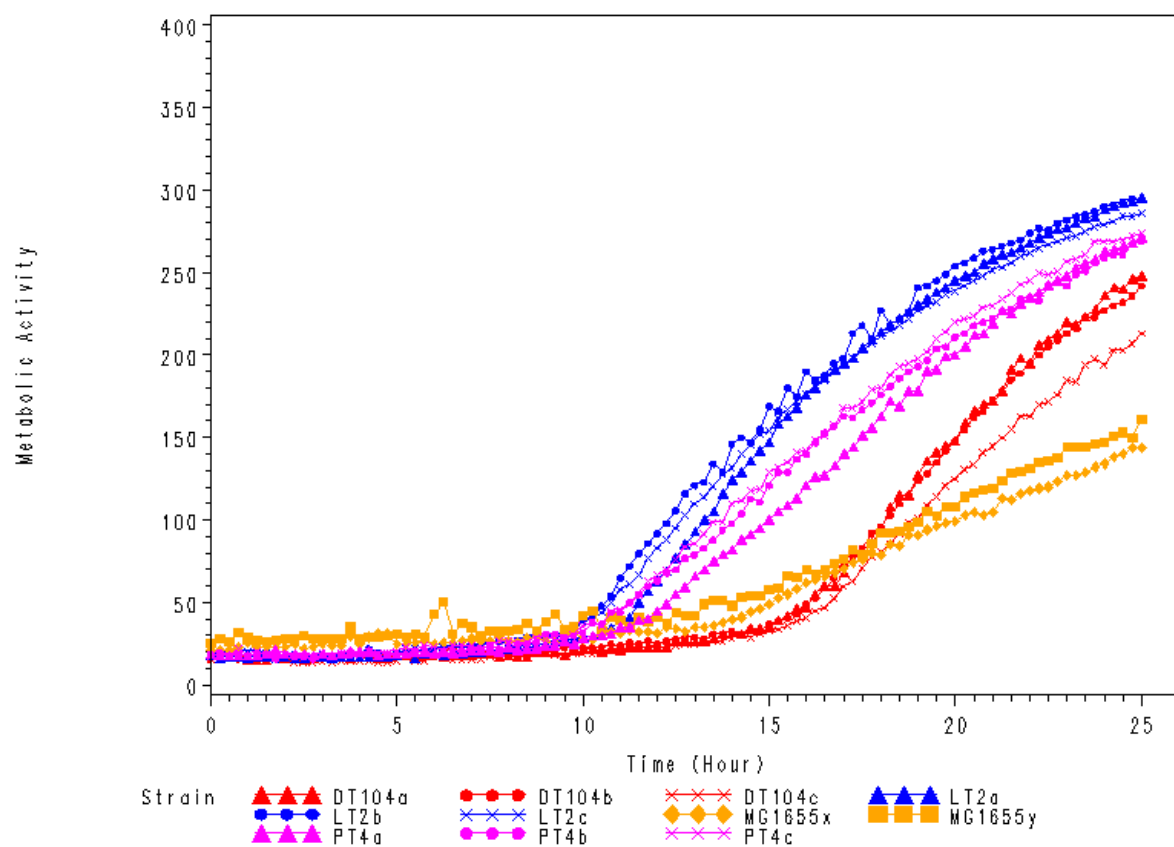

PM03B, H12 (Met—Ala)

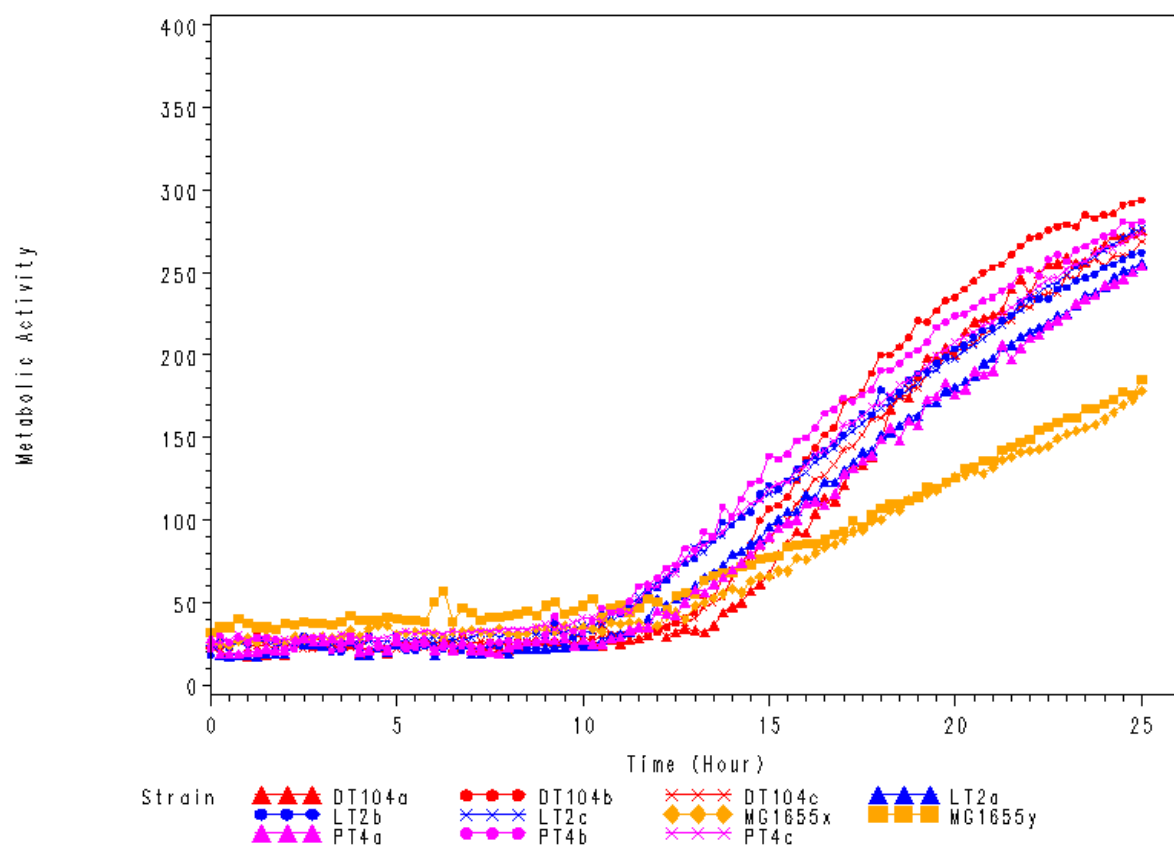

Supplement: supp_M109.005868_jbc.M109.005868-2.pdf [file supp_M109.005868_jbc.M109.005868-2.pdf]
