# Supplementary material
Source: PubMed Central journal article supplement (PMC2785581)

Kinetic Data of Phosphorus Source Utilisation

PM04A, A01 (Negative Control)

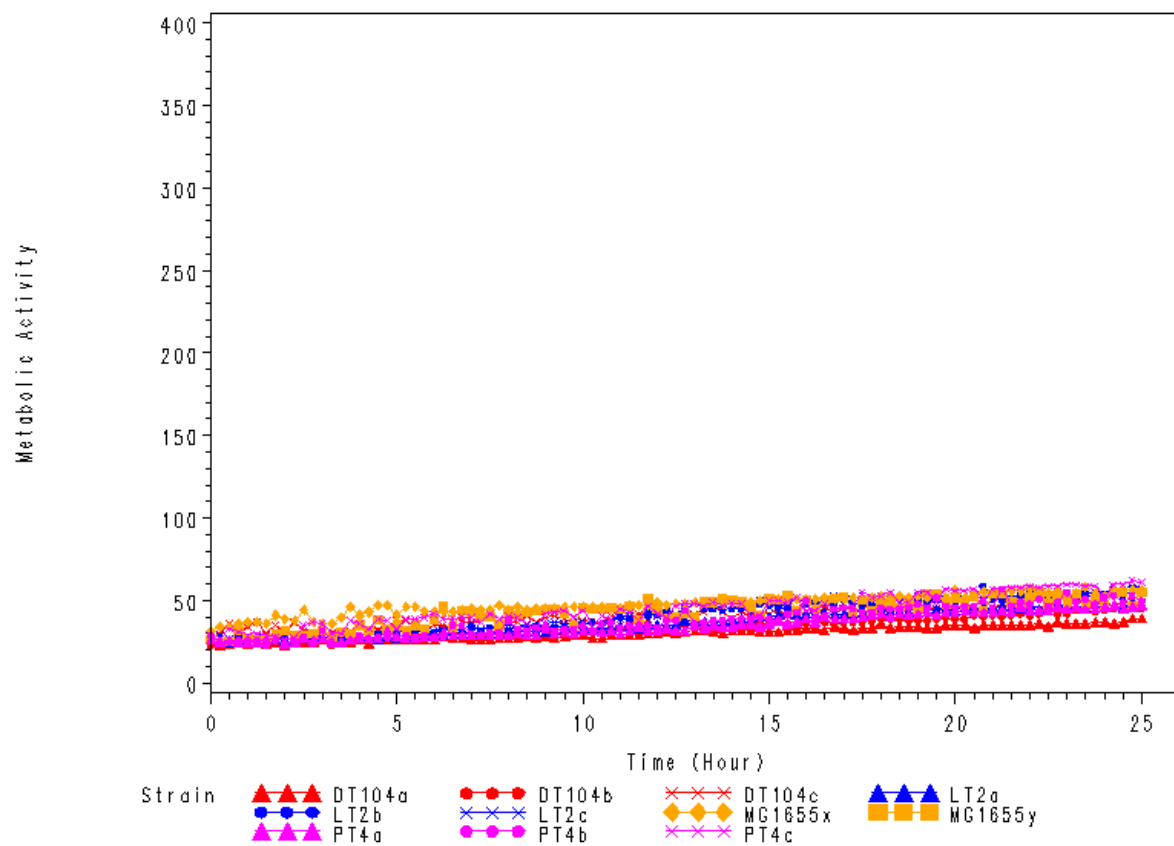

PM04A, A02 (Phosphate)

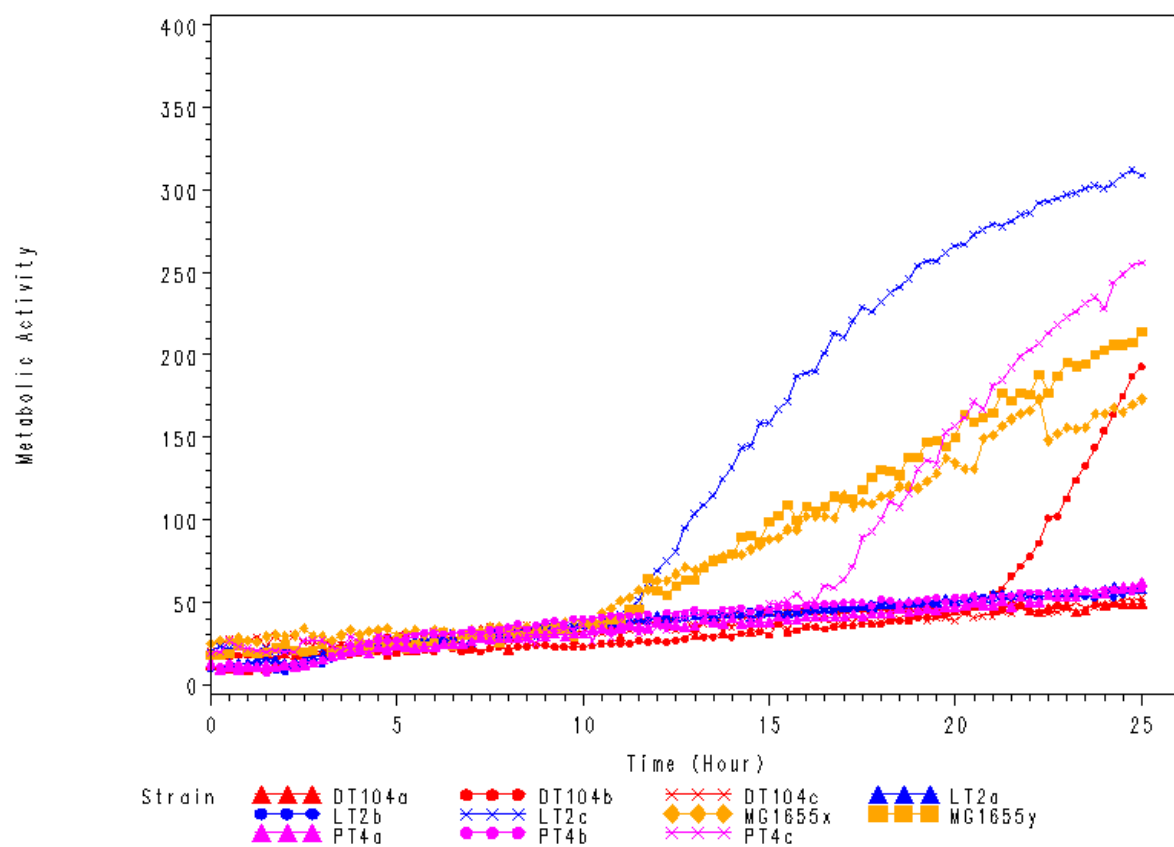

PM04A, A03 (Pyrophosphate)

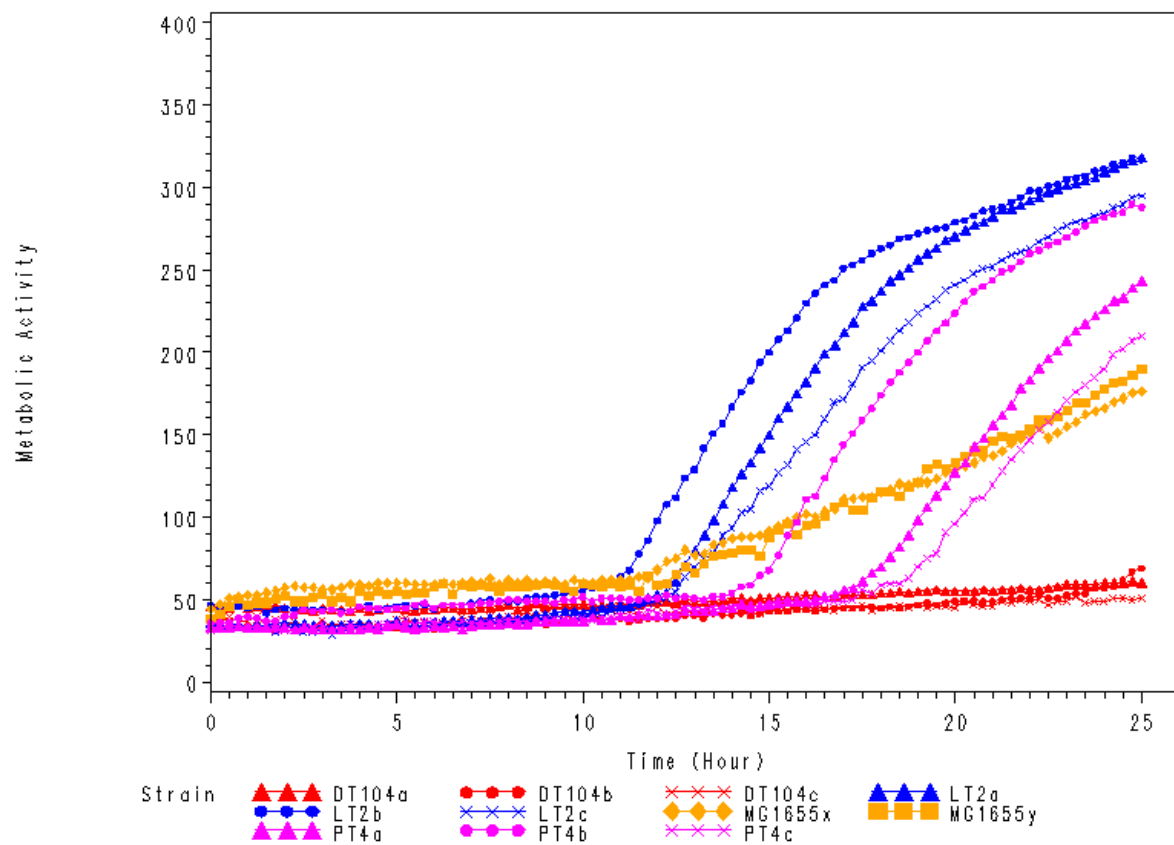

Kinetic Data of Phosphorus Source Utilisation

PM04A, A04 (Trimetaphosphate)

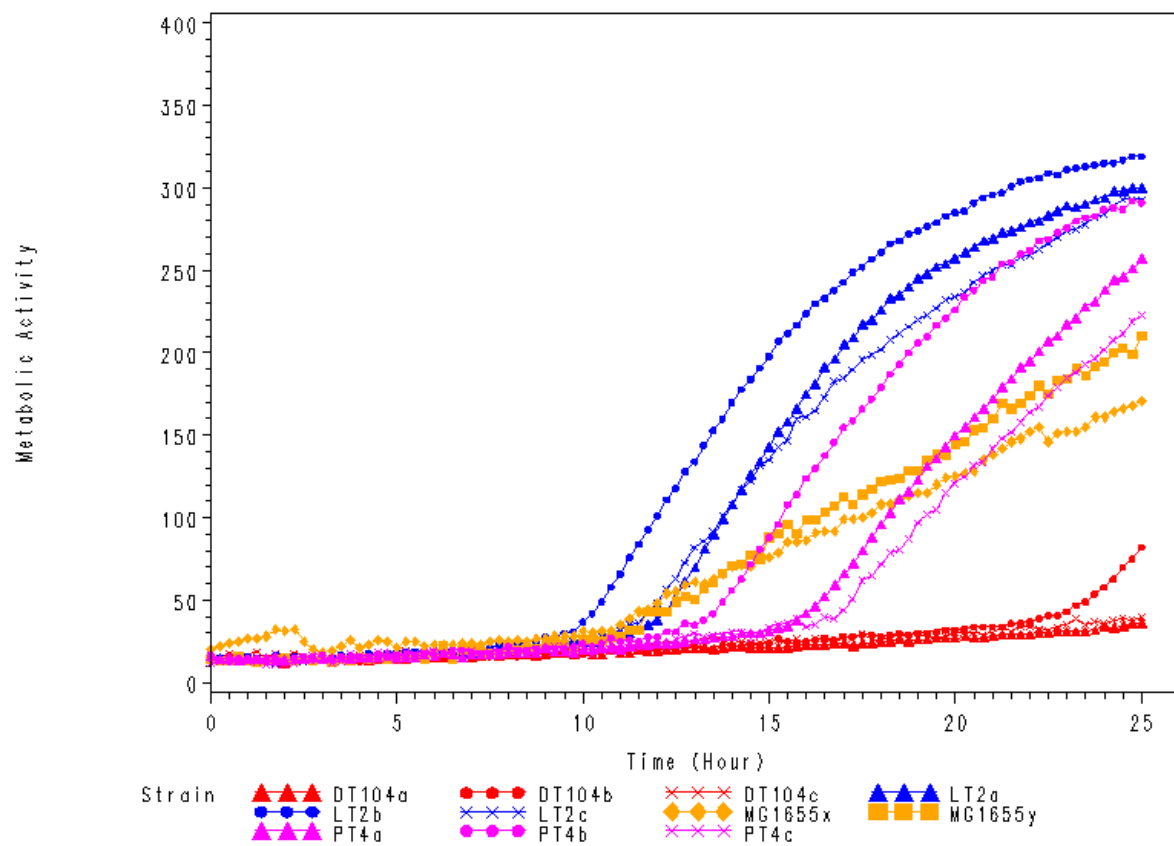

PM04A, A05 (Tripolyphosphate)

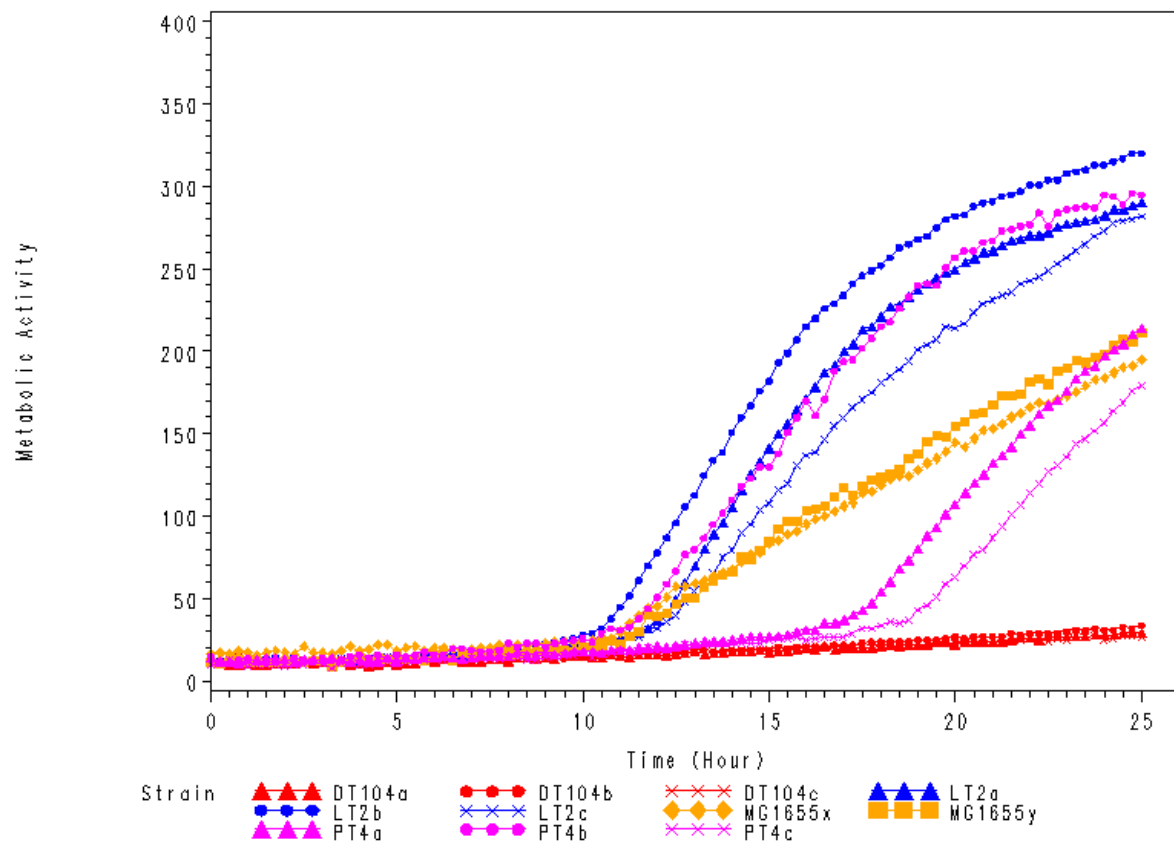

PM04A, A06 (Triethyl Phosphate)

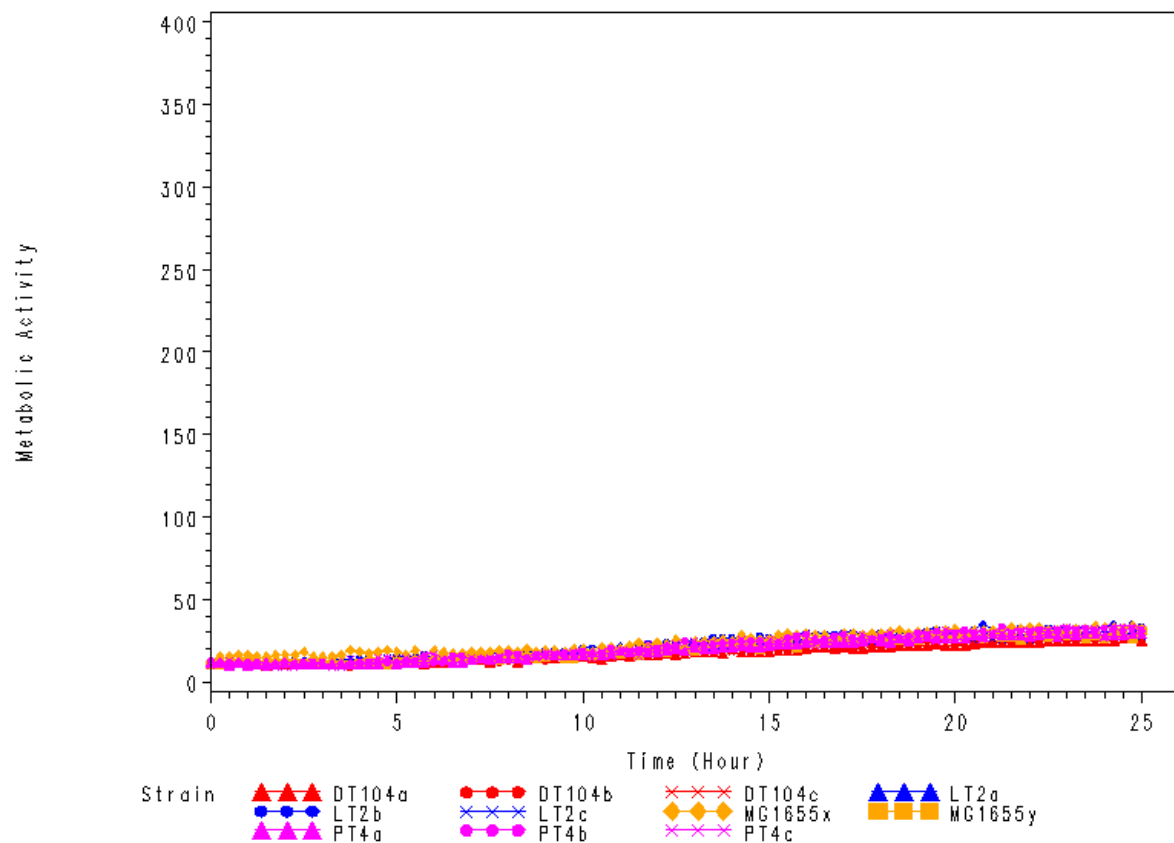

Kinetic Data of Phosphorus Source Utilisation

PM04A, A07 (Hypophosphite)

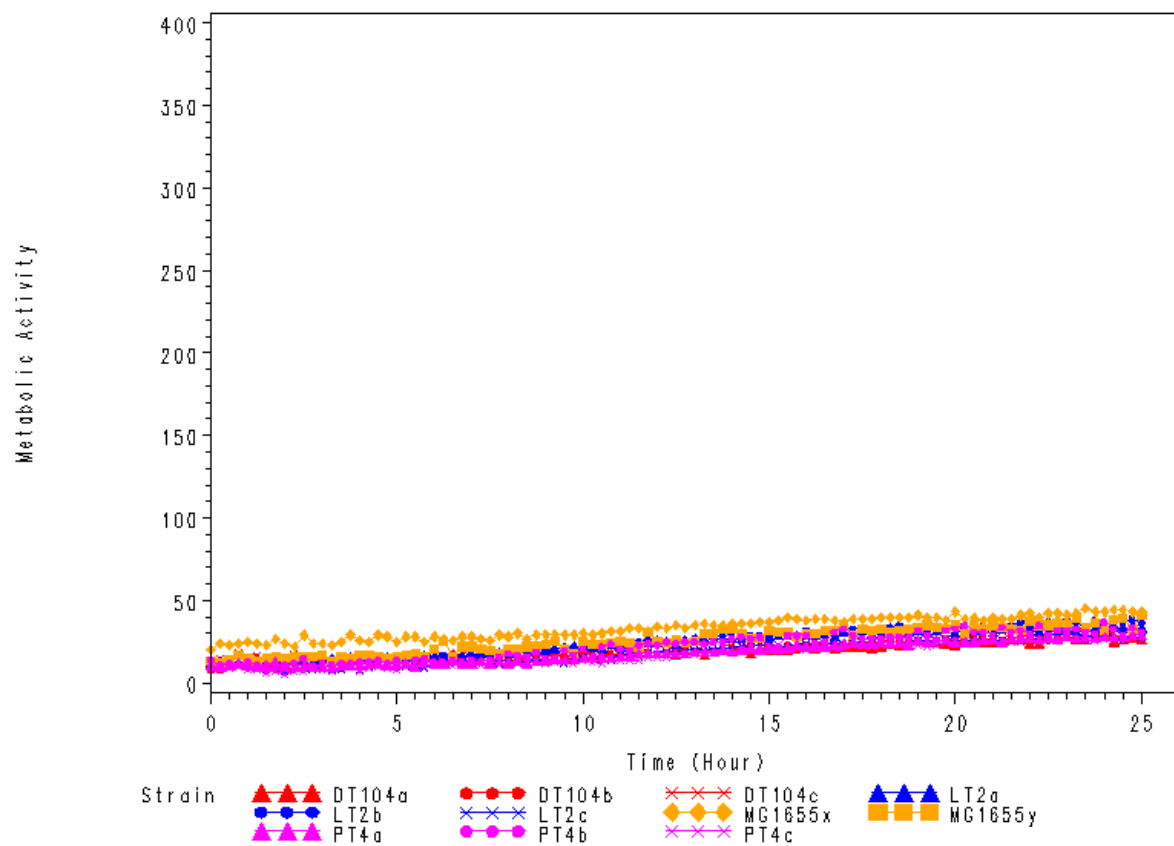

PM04A, A08 (Adenosine-2AE-Monophosphate)

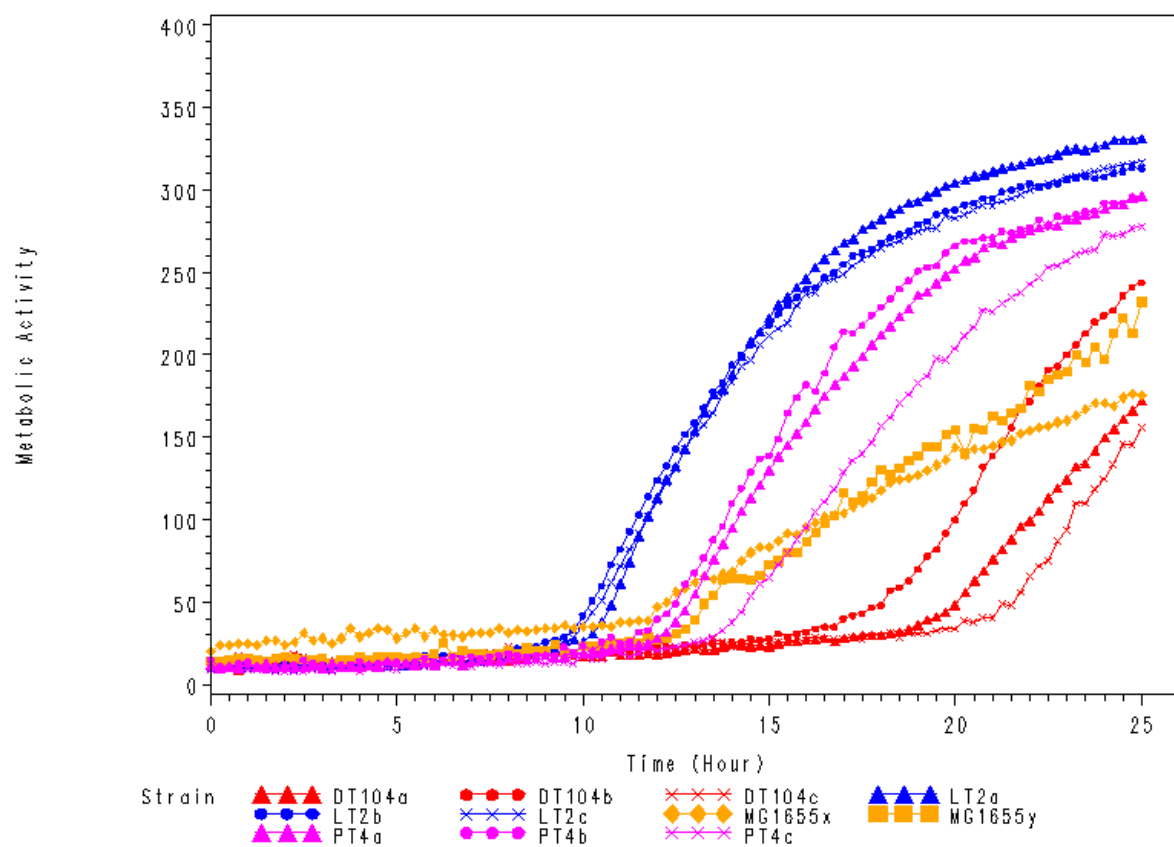

PM04A, A09 (Adenosine-3AE-Monophosphate)

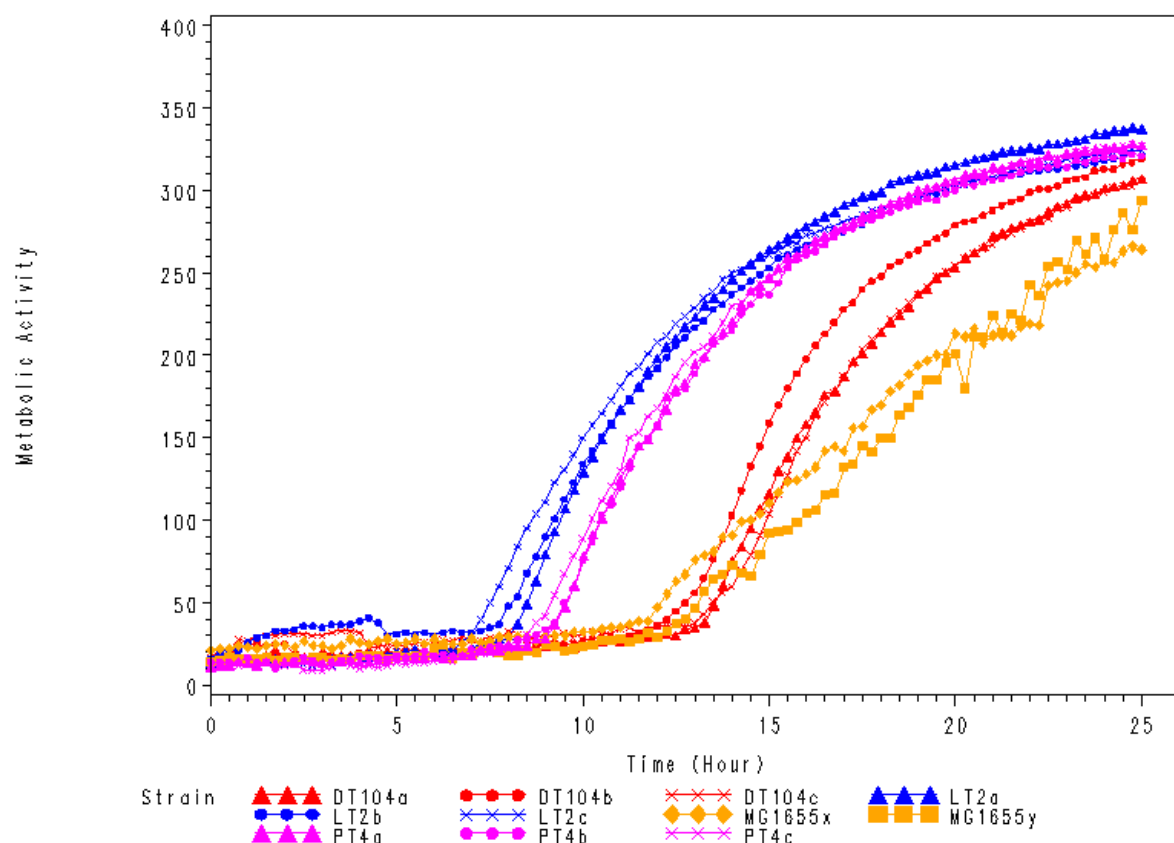

PM04A, A10 (Adenosine – 5' – Monophosphate)

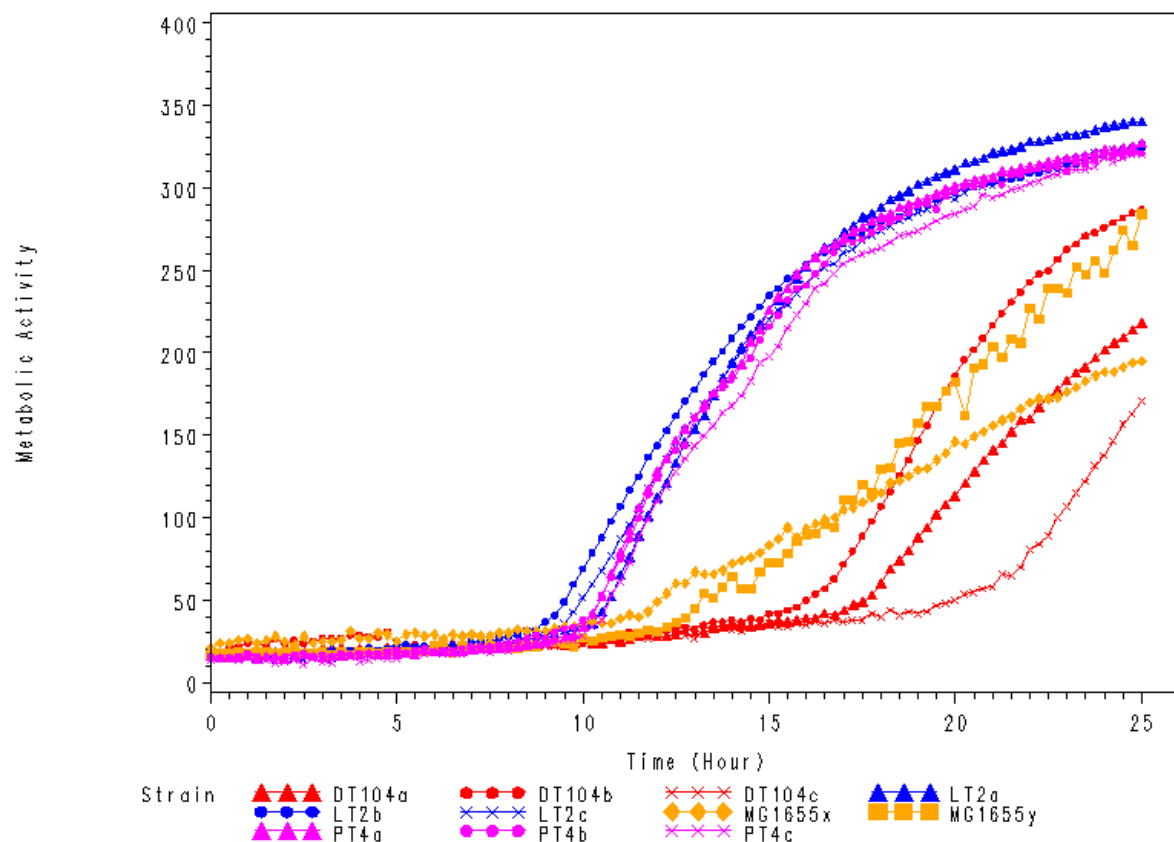

PM04A, A11 (Adenosine – 2',3' – Cyclic Monophosphate)

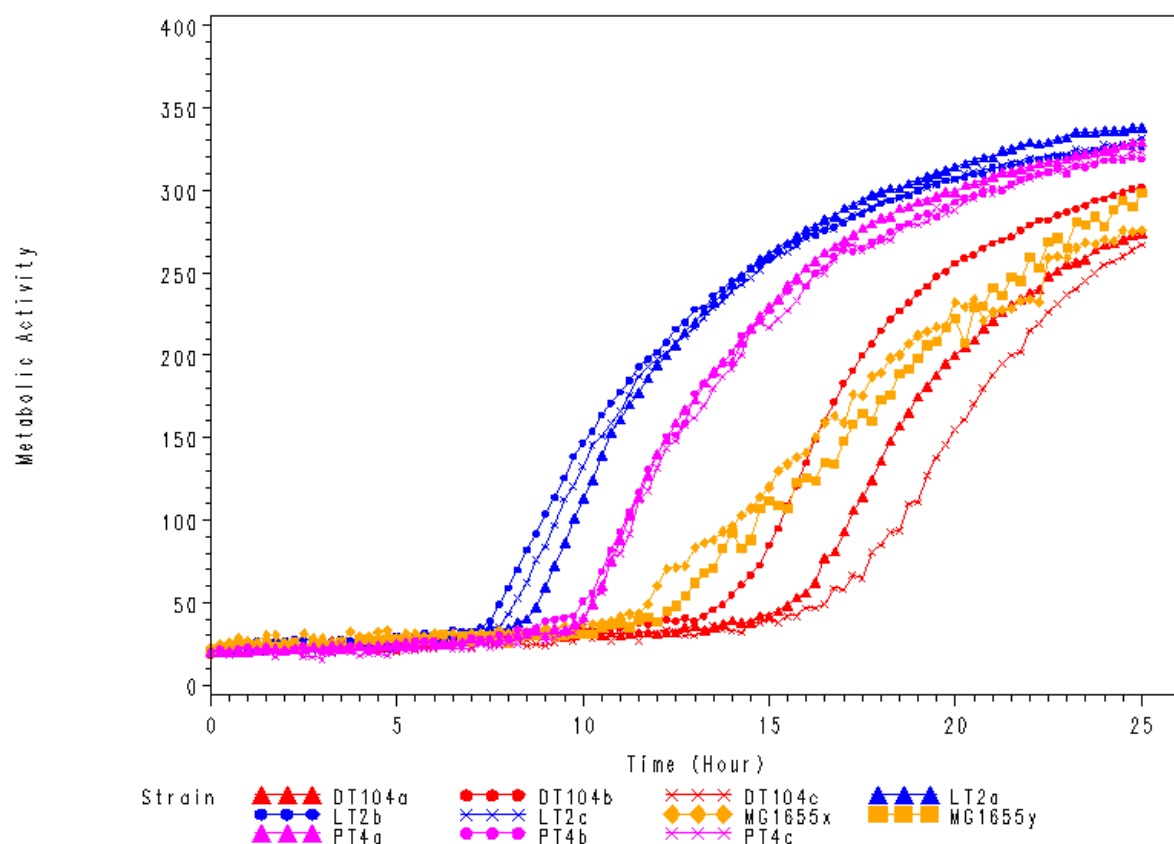

PM04A, A12 (Adenosine – 3',5' – Cyclic Monophosphate)

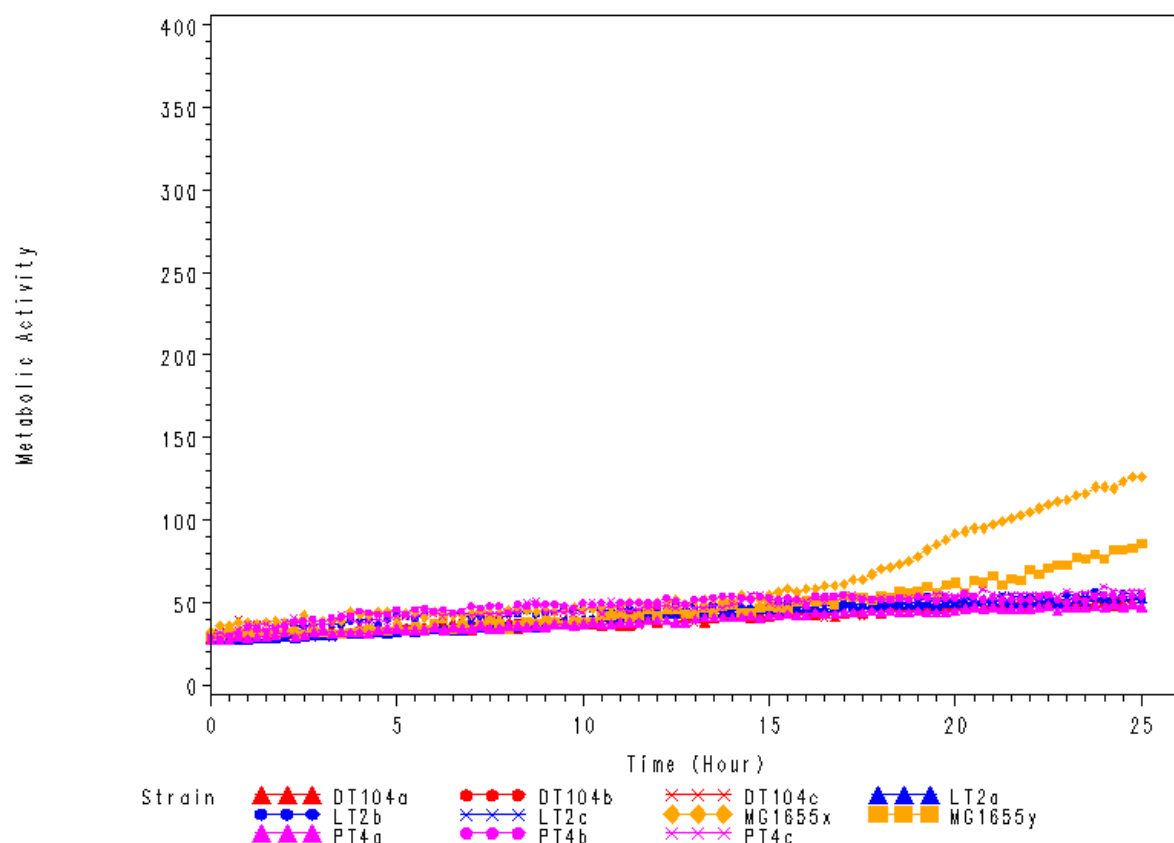

Kinetic Data of Phosphorus Source Utilisation

PM04A, B01 (Thiophosphate)

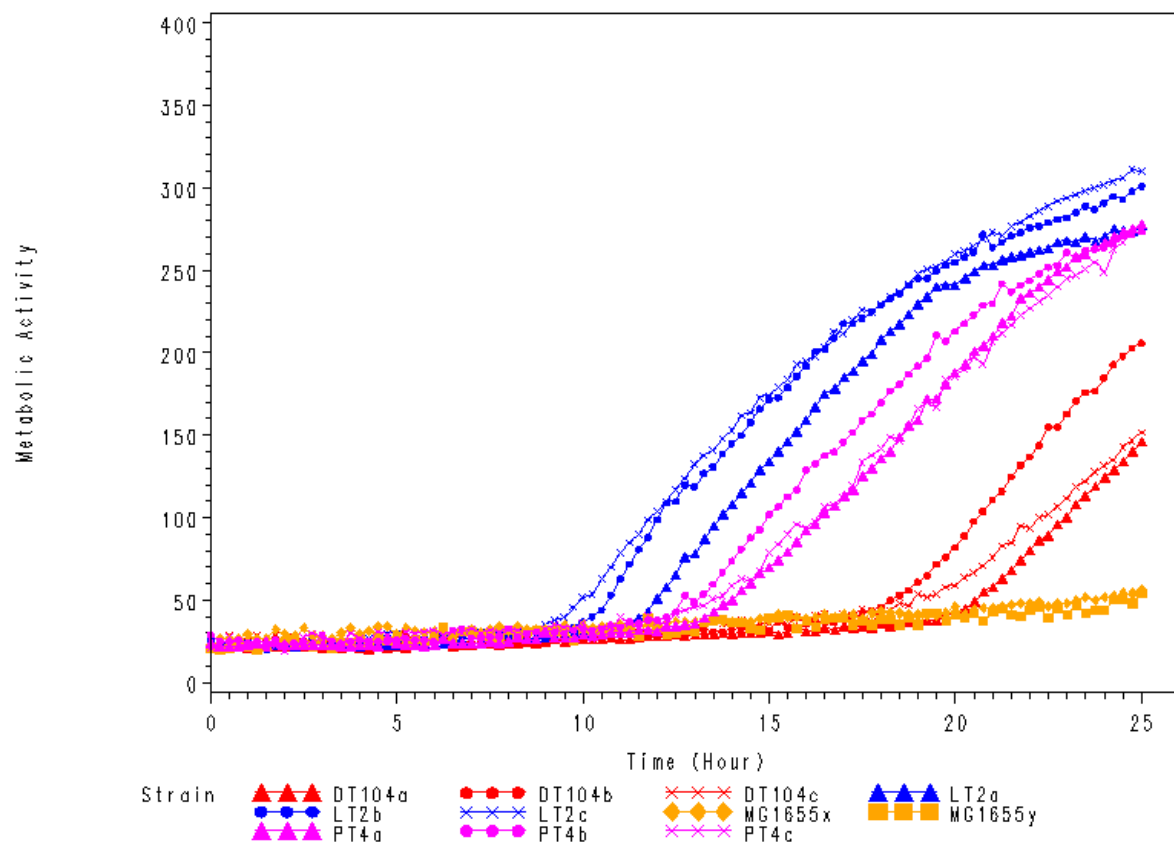

PM04A, B02 (Dithiophosphate)

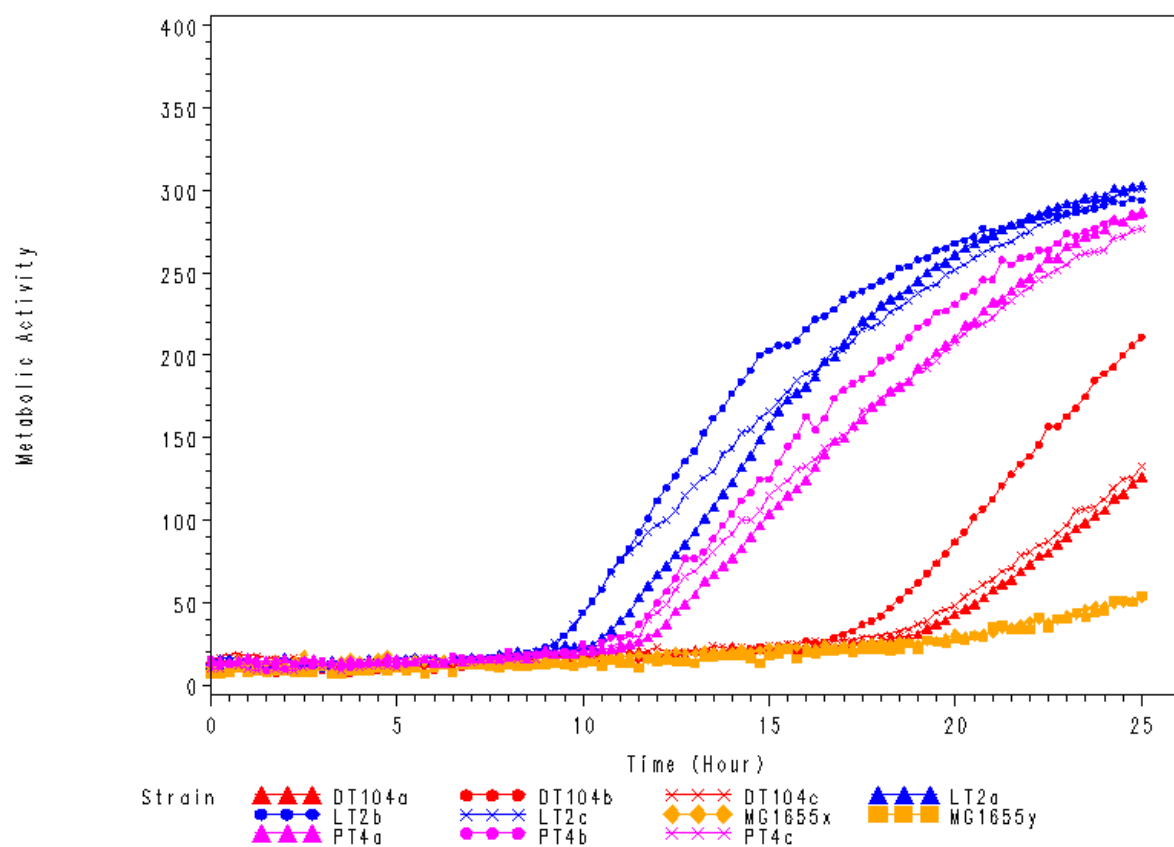

PM04A, B03 (D,L-a-Glycerol Phosphate)

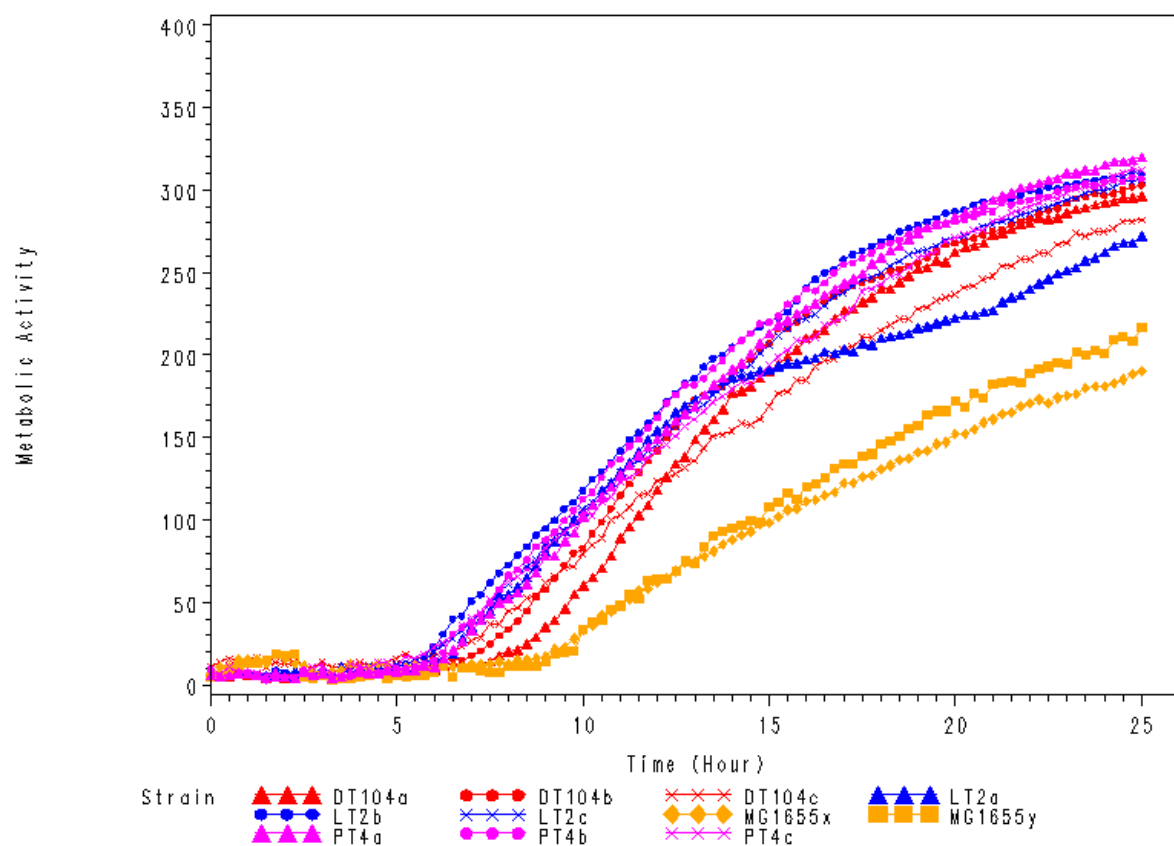

Kinetic Data of Phosphorus Source Utilisation

PM04A, B04 (b-Glycerol Phosphate)

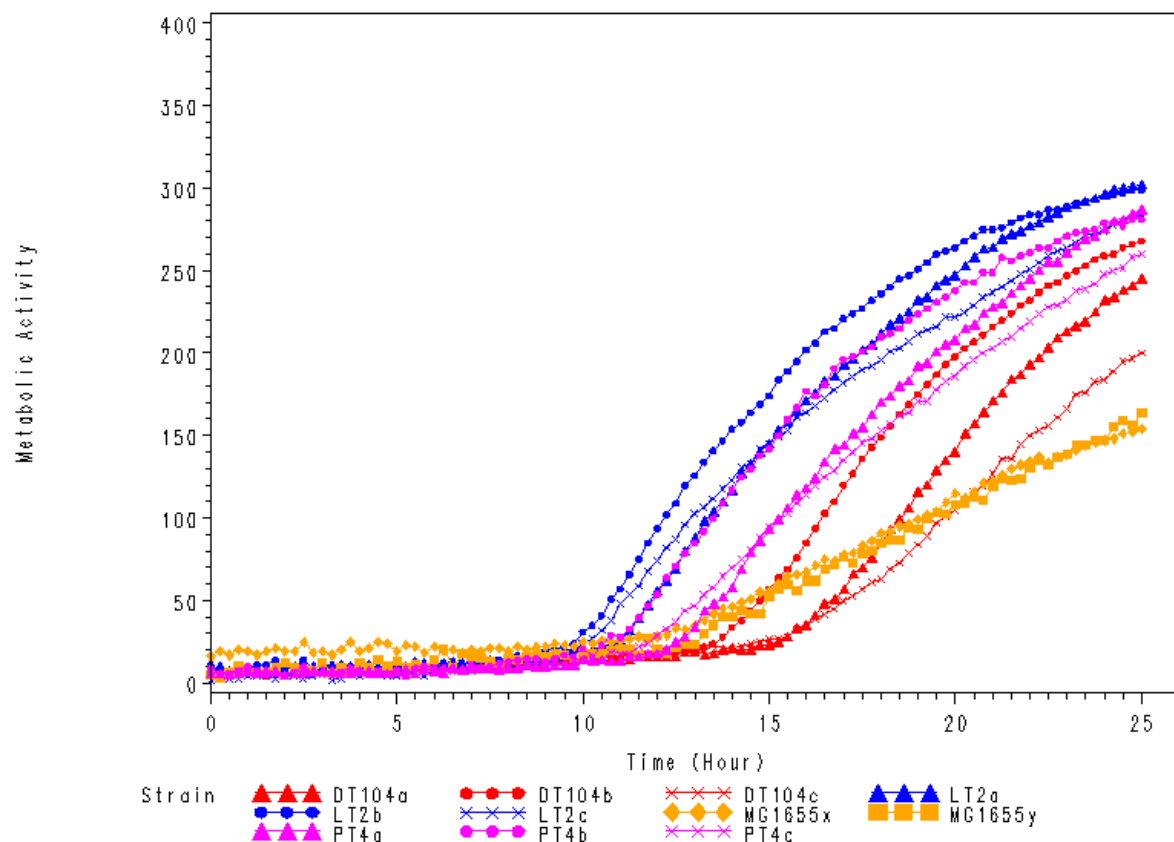

PM04A, B05 (L-a-Phosphatidyl-D,L-Glycerol)

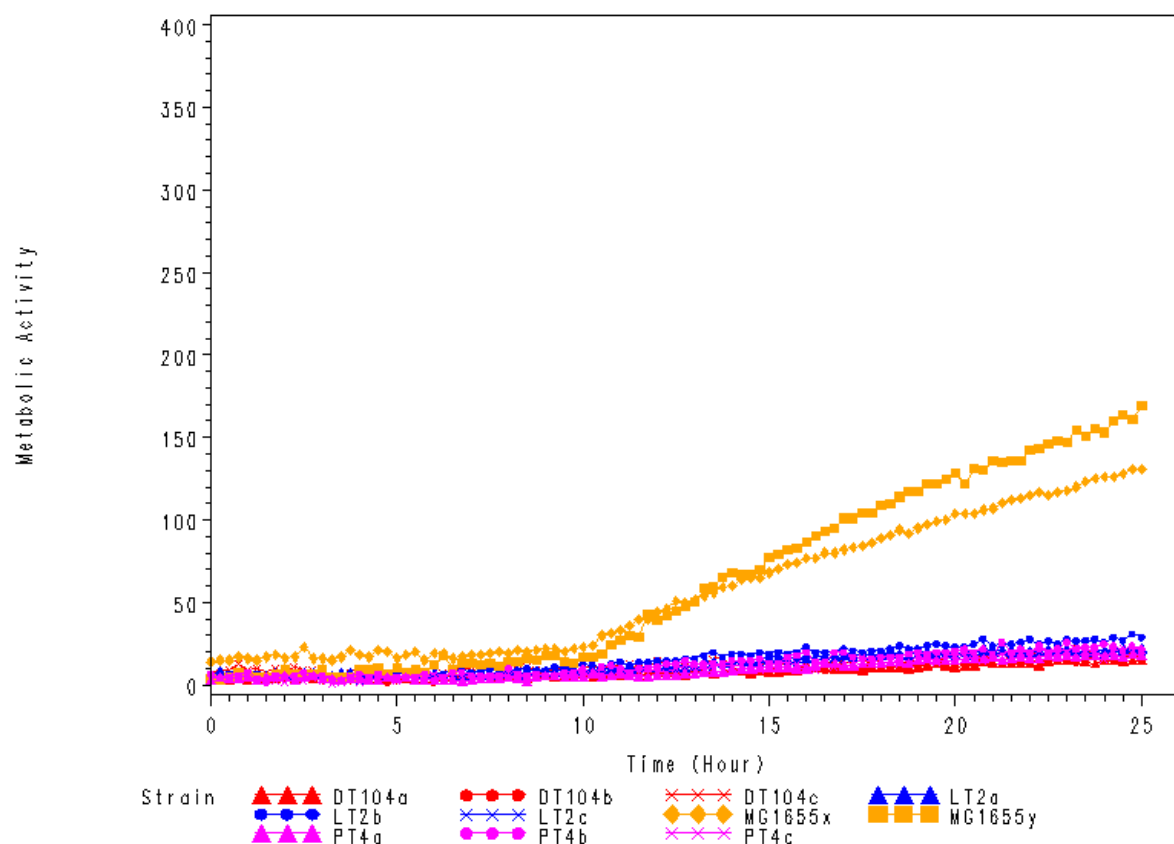

PM04A, B06 (D-2-Phospho-Glyceric Acid)

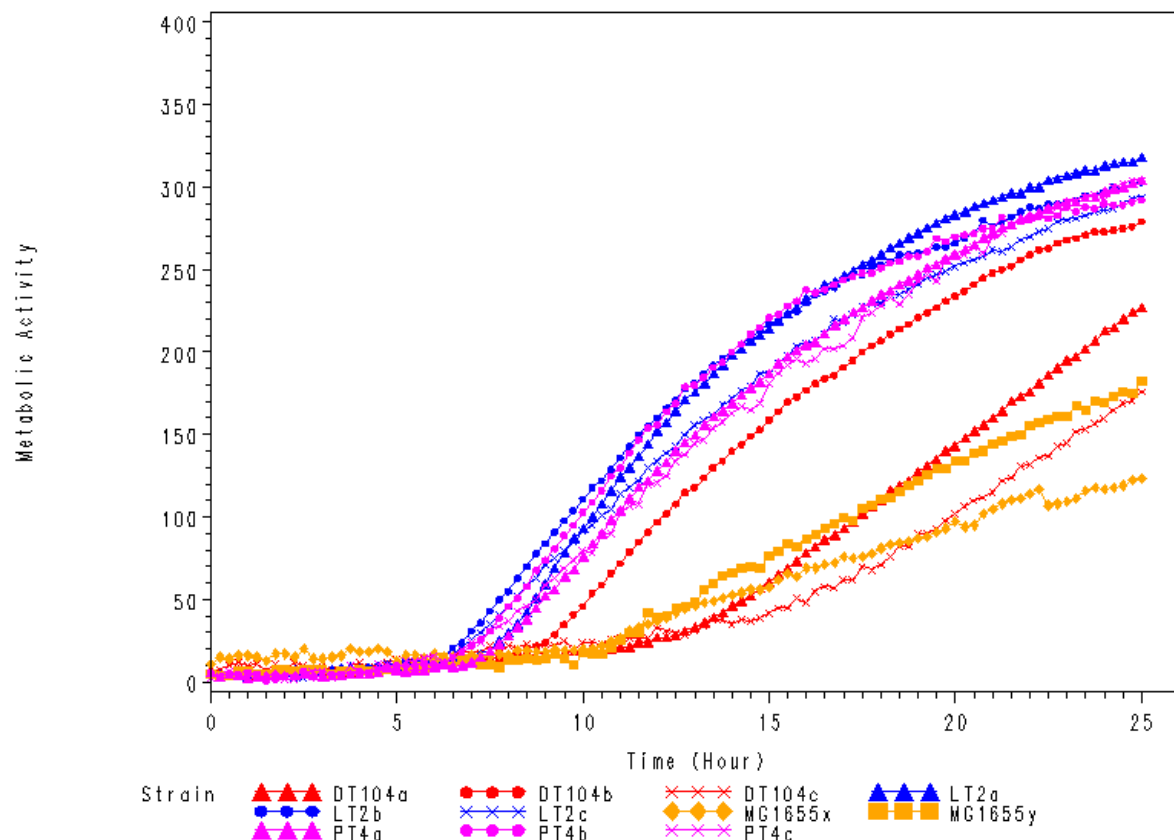

Kinetic Data of Phosphorus Source Utilisation

PM04A, B07 (D-3-Phospho-Glyceric Acid)

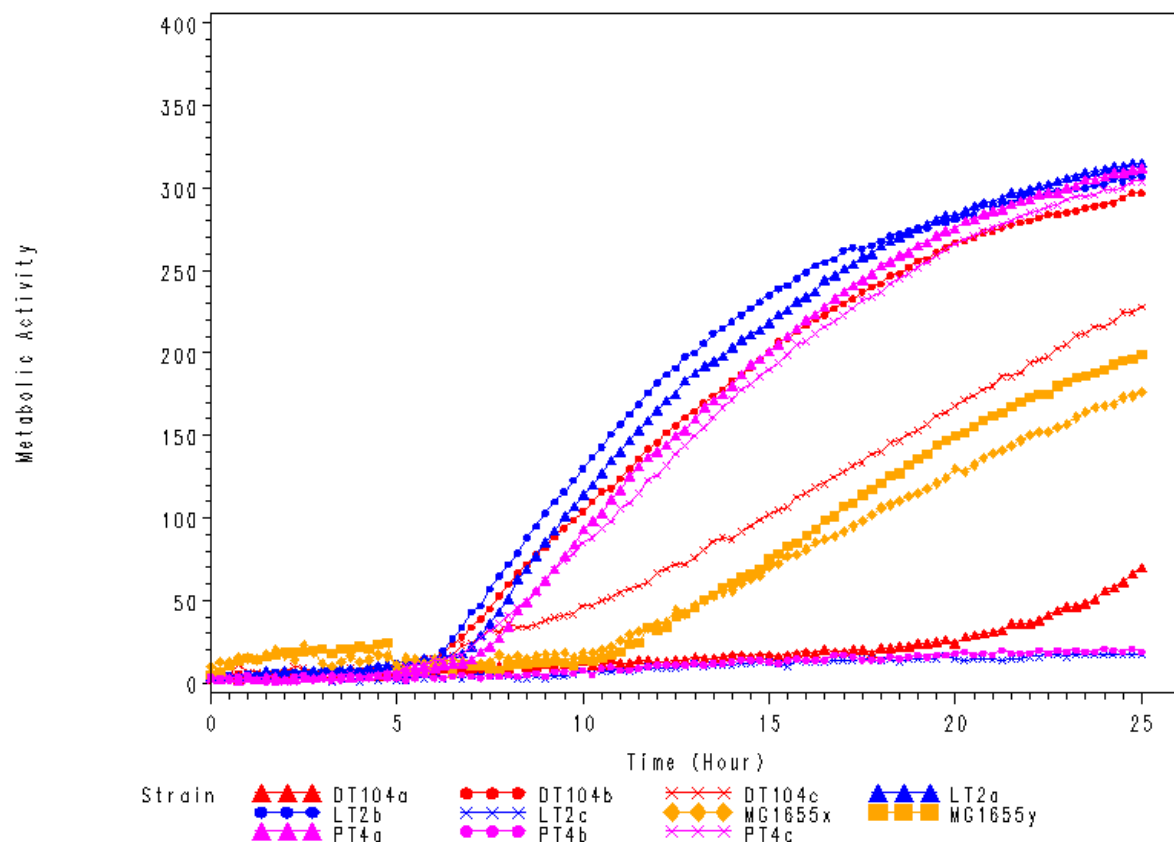

PM04A, B08 (Guanosine- 2Æ-Monophosphate)

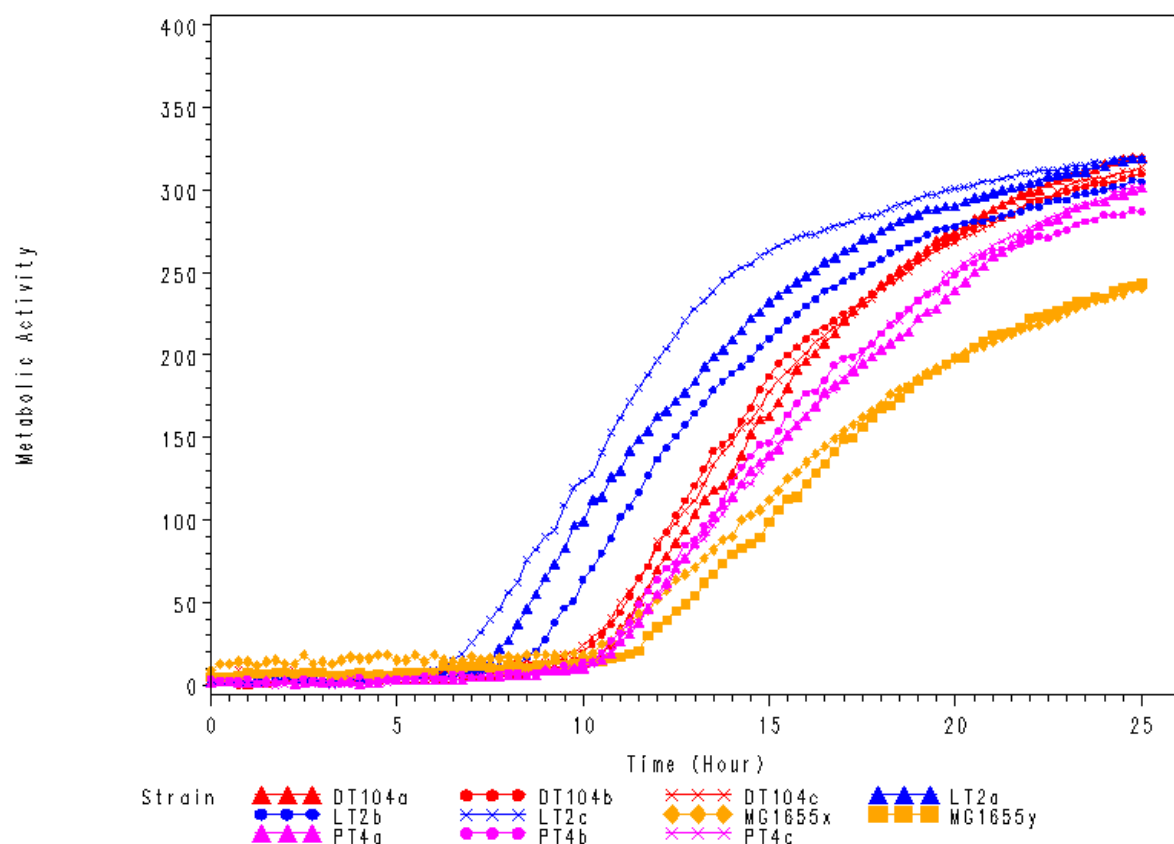

PM04A, B09 (Guanosine- 3Æ-Monophosphate)

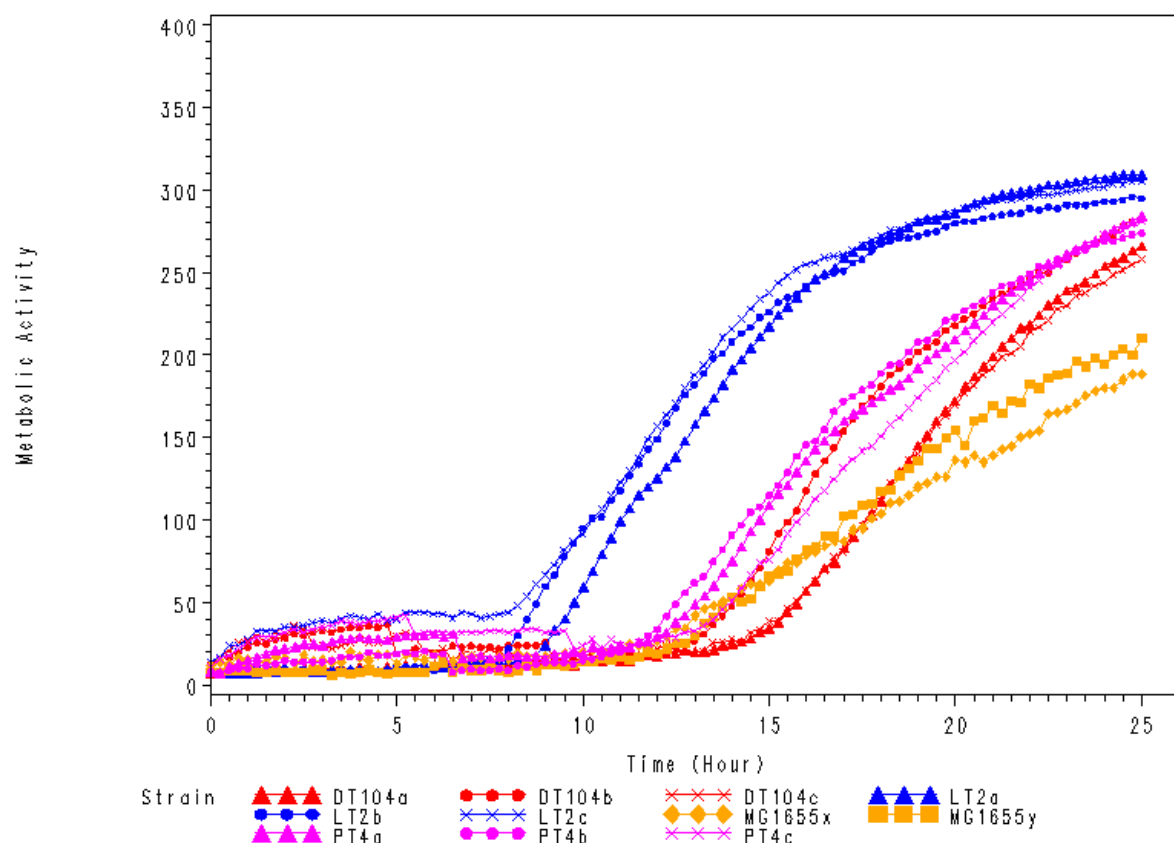

PM04A, B10 (Guanosine-5'-Monophosphate)

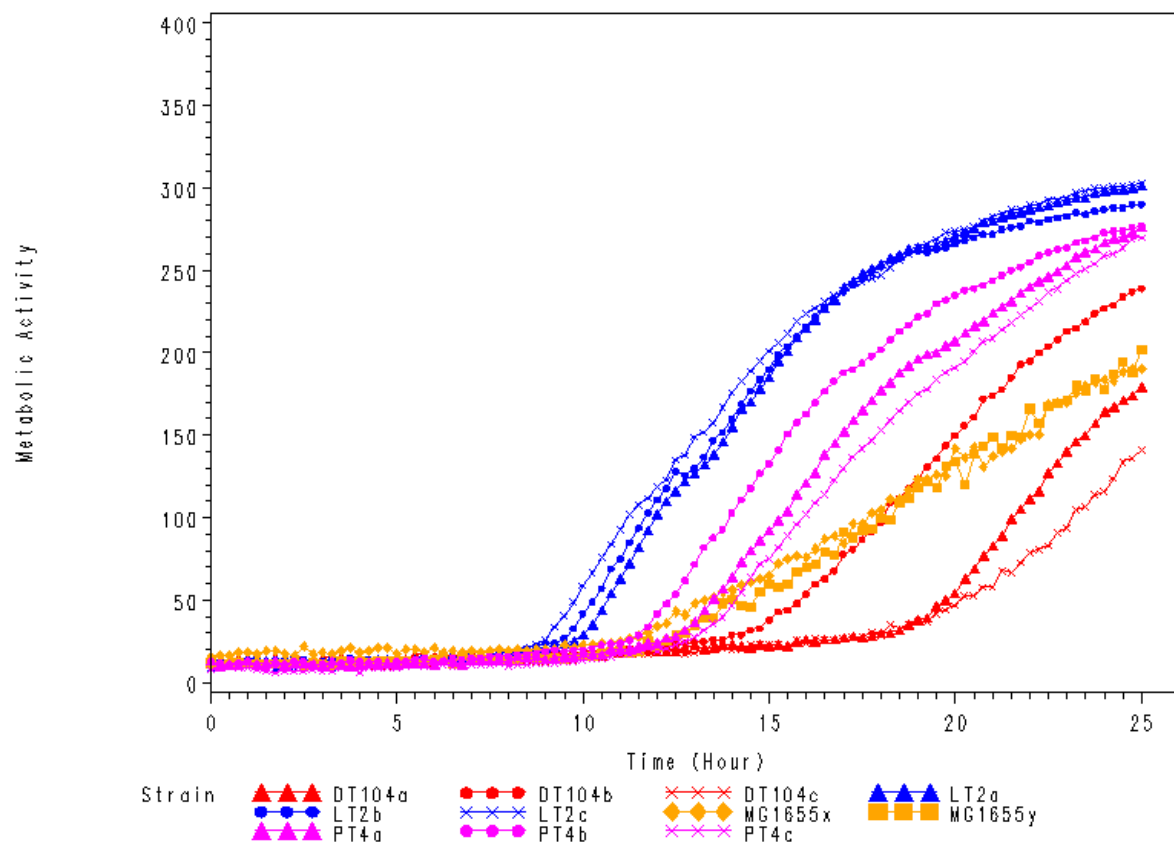

PM04A, B11 (Guanosine-2',3'-Cyclic Monophosphate)

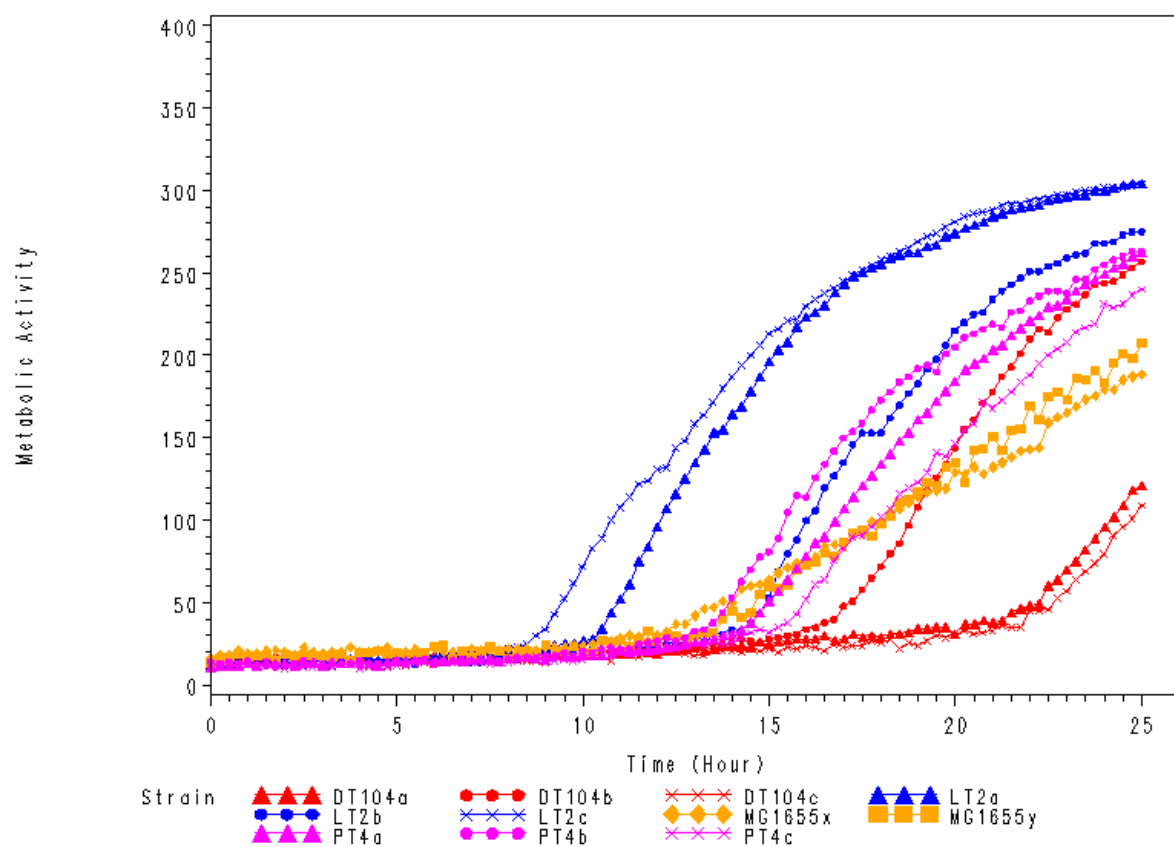

PM04A, B12 (Guanosine-3',5'-Cyclic Monophosphate)

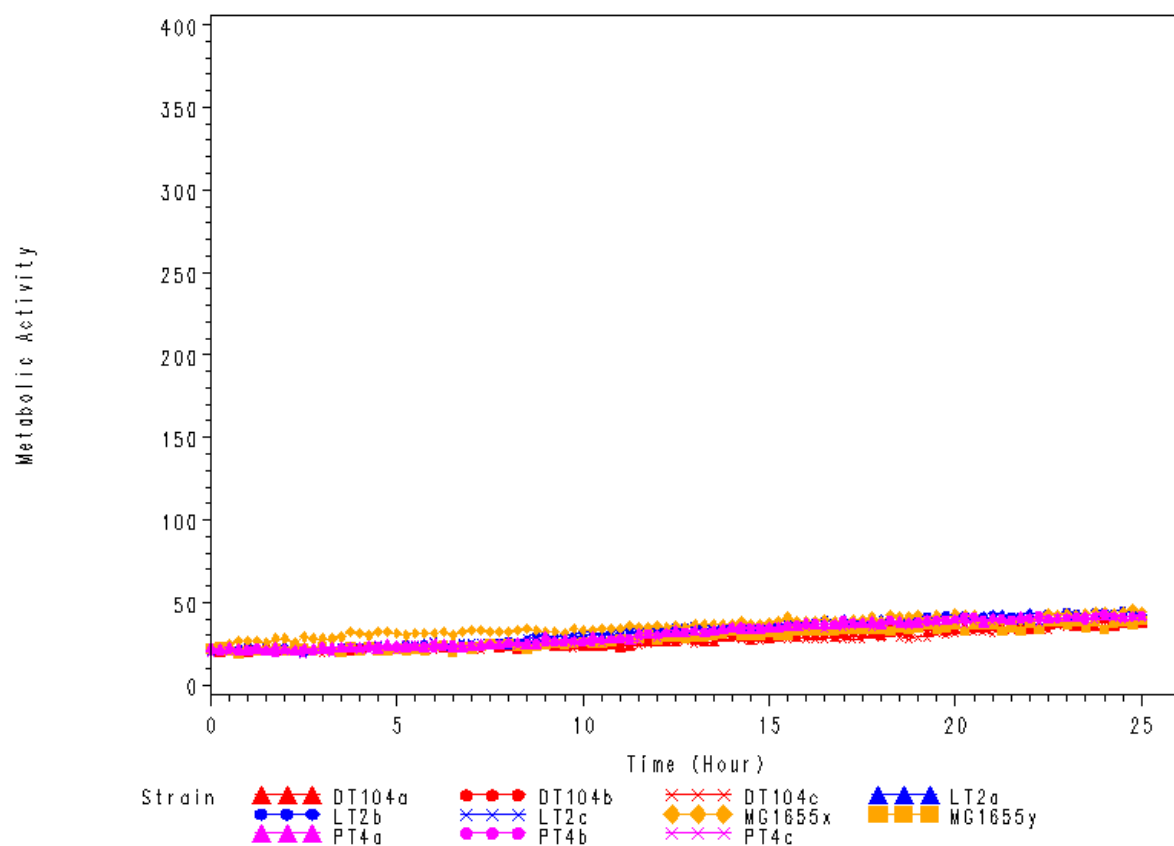



Kinetic Data of Phosphorus Source Utilisation

PM04A, C01 (Phosphoenol Pyruvate)

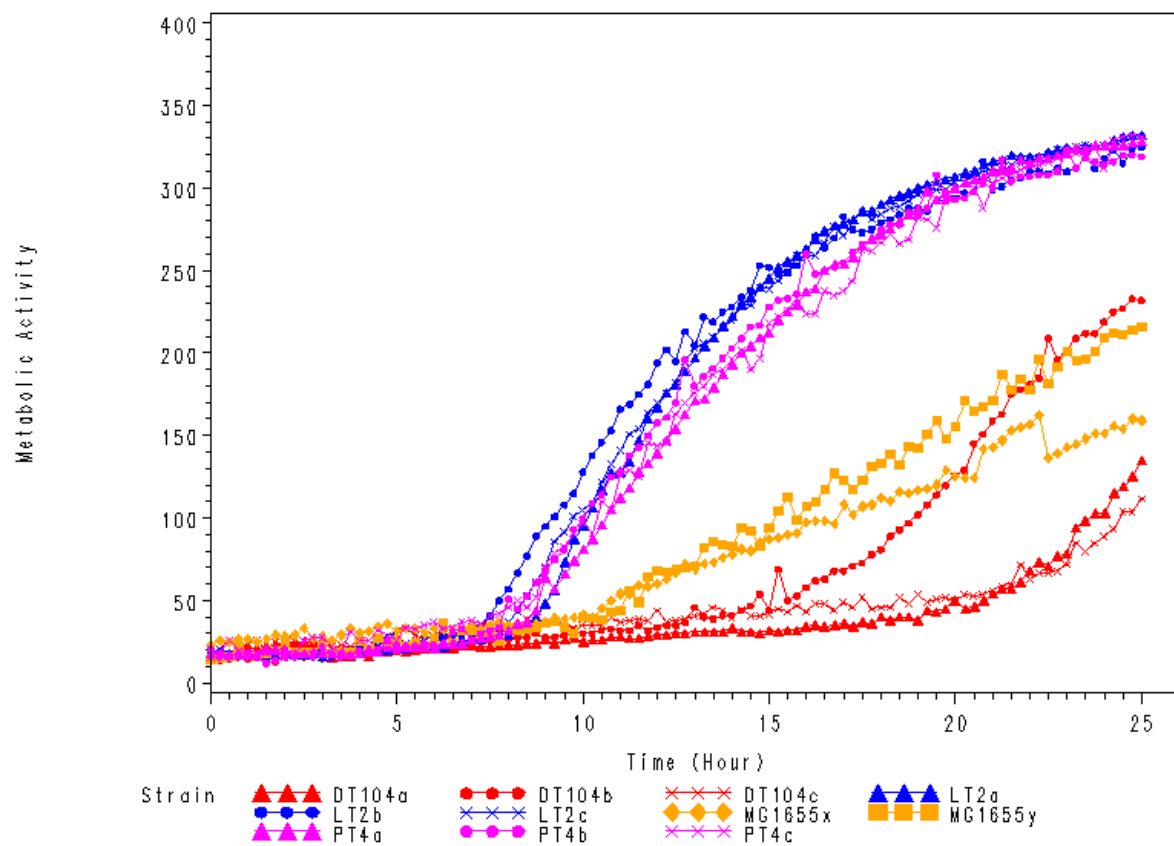

PM04A, C02 (Phospho-Glycolic Acid)

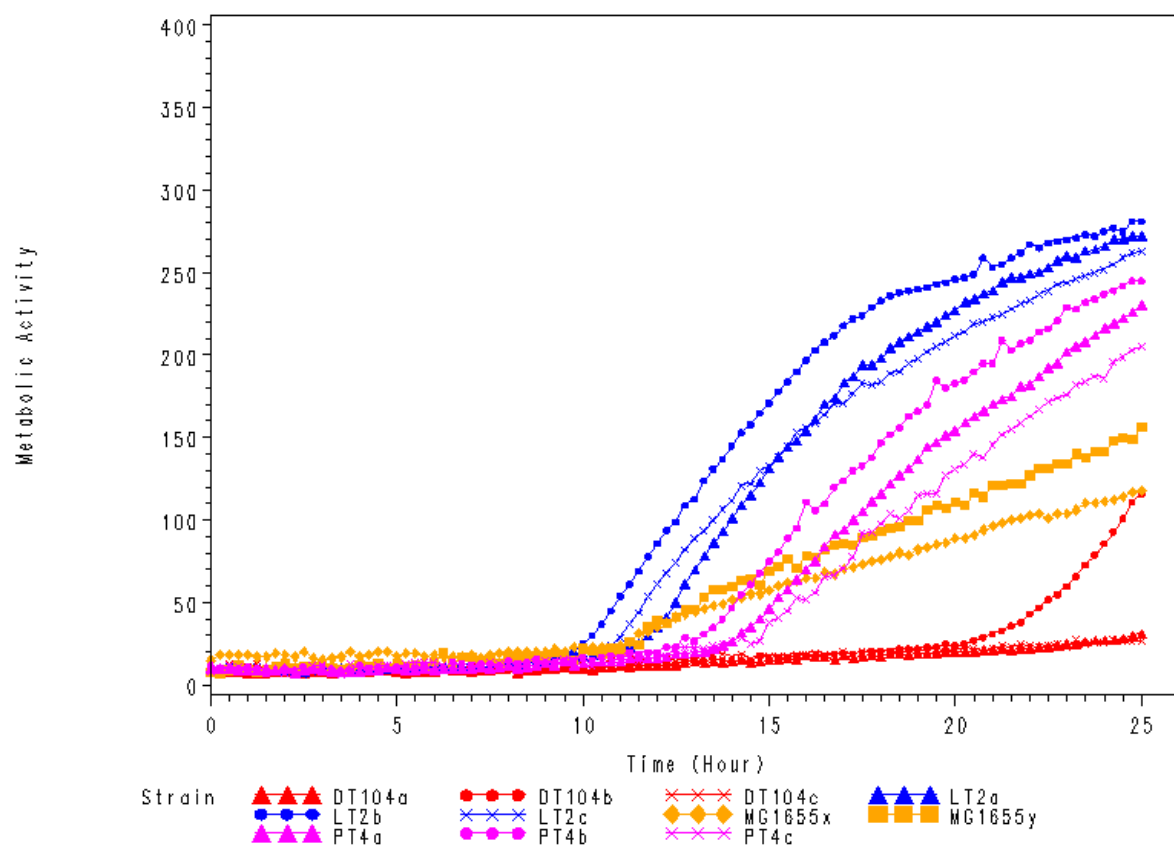

PM04A, C03 (D-Glucose-1-Phosphate)

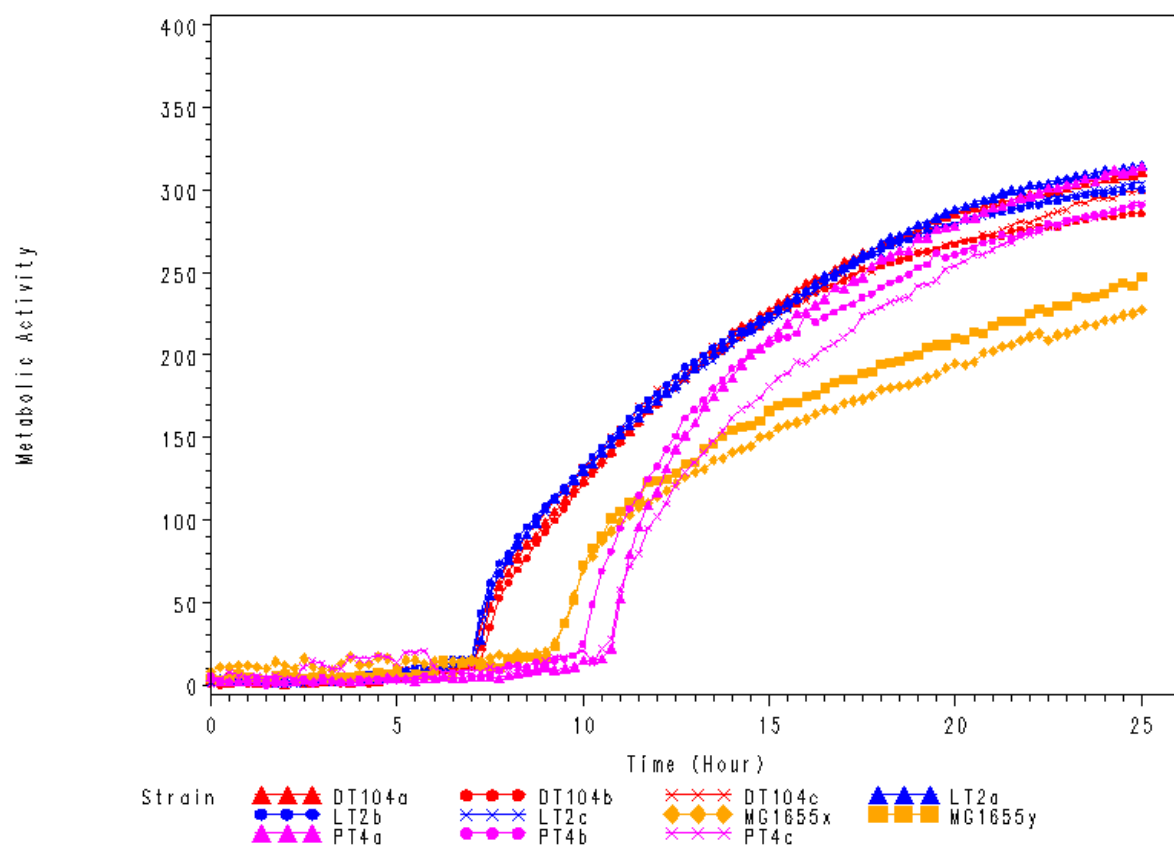

Kinetic Data of Phosphorus Source Utilisation

PM04A, C04 (D-Glucose-6-Phosphate)

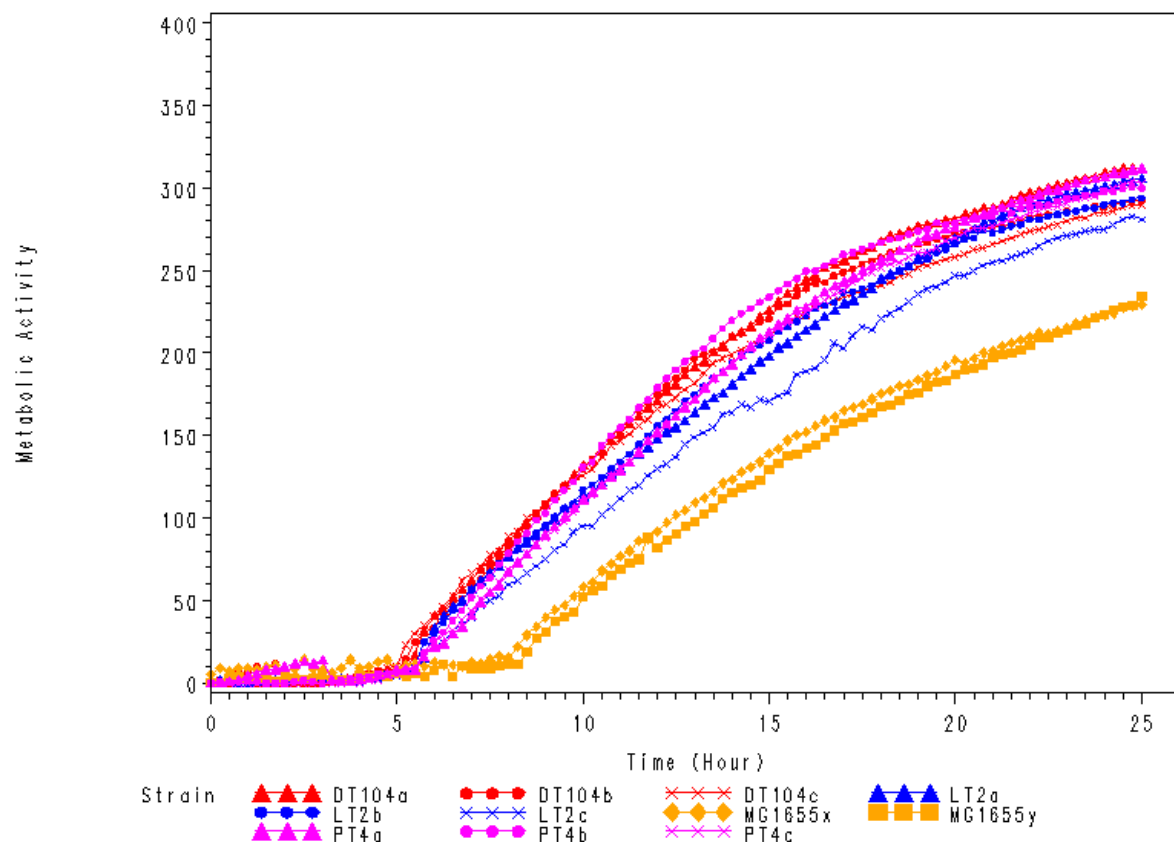

PM04A, C05 (2-Deoxy-D-Glucose 6-Phosphate)

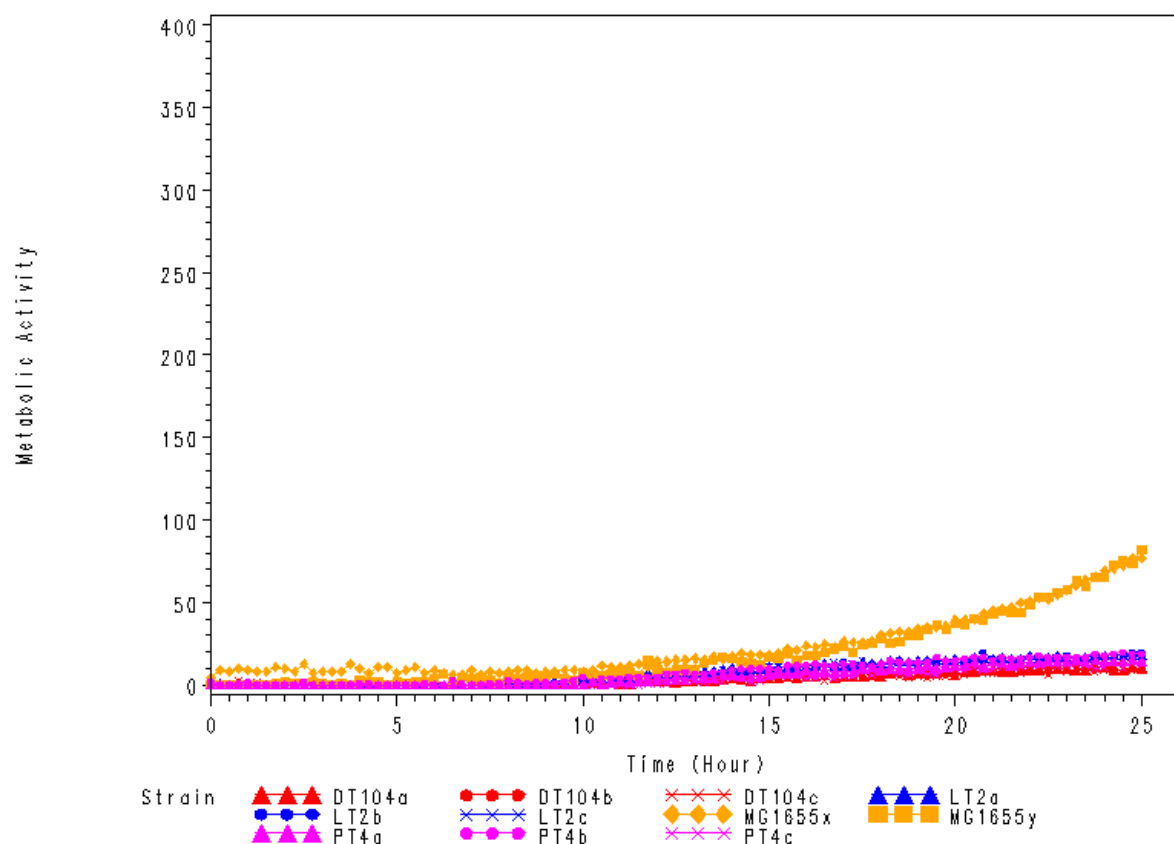

PM04A, C06 (D-Glucosamine-6-Phosphate)

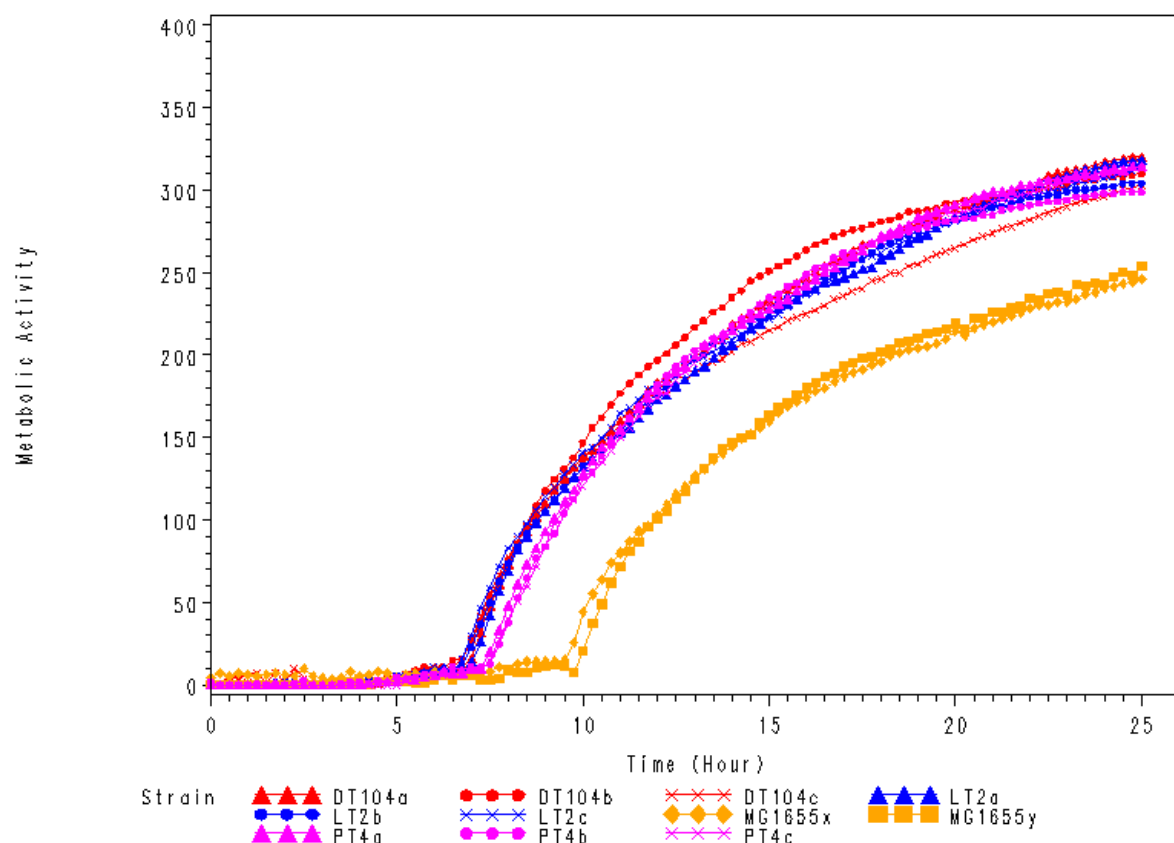

Kinetic Data of Phosphorus Source Utilisation

PM04A, C07 (6-Phospho-Gluconic Acid)

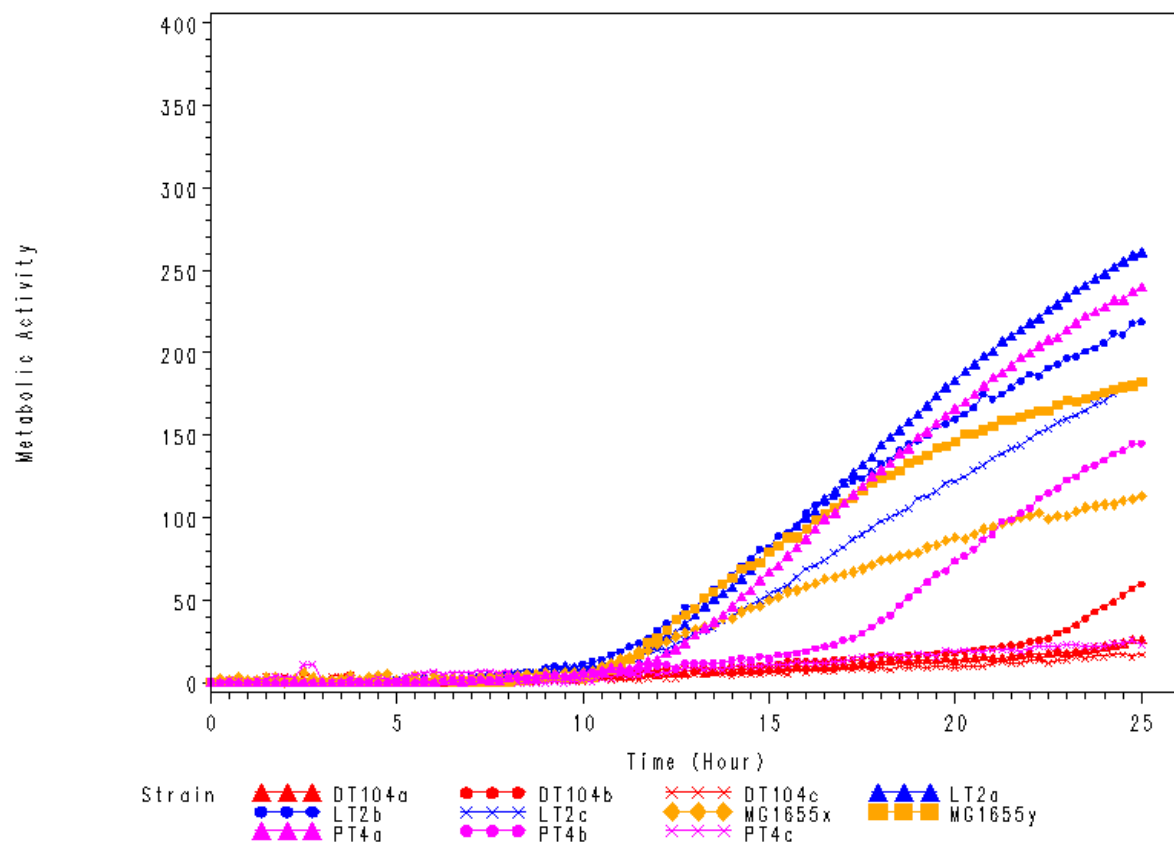

PM04A, C08 (Cytidine-2Æ-Monophosphate)

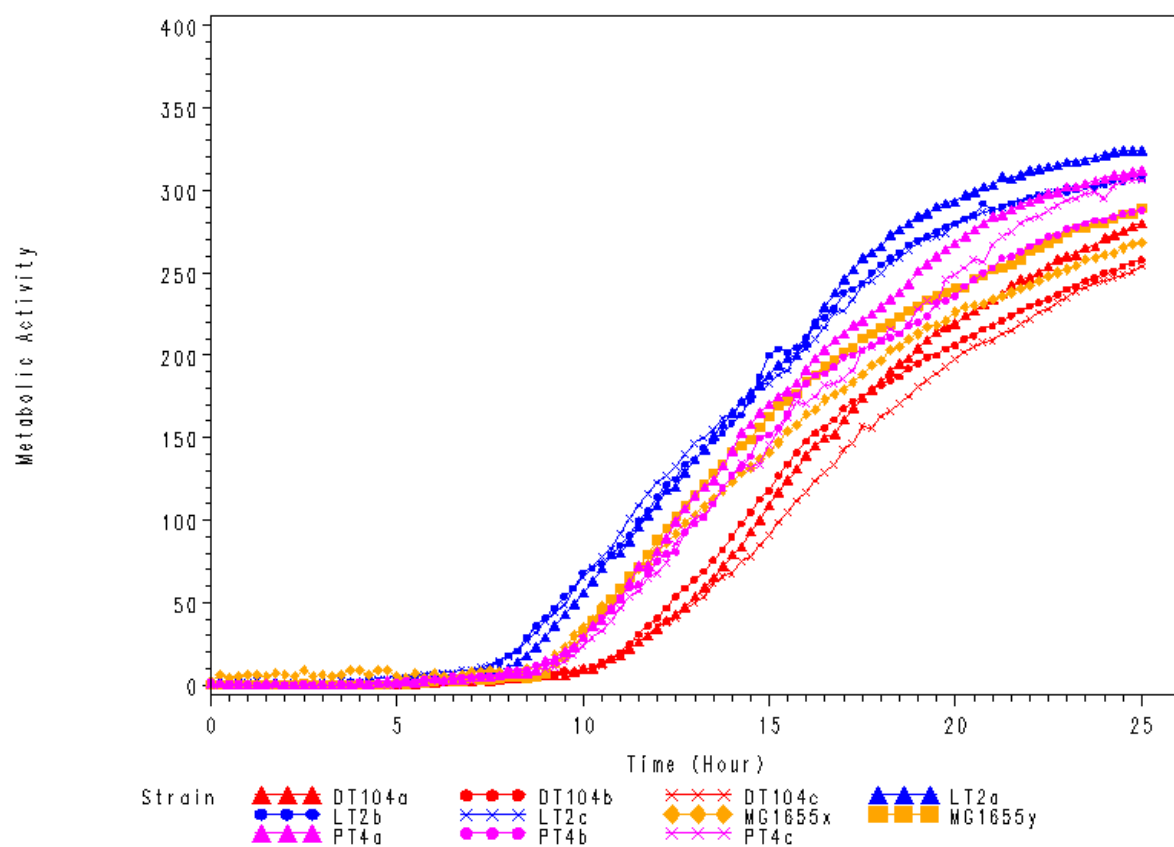

PM04A, C09 (Cytidine-3Æ-Monophosphate)

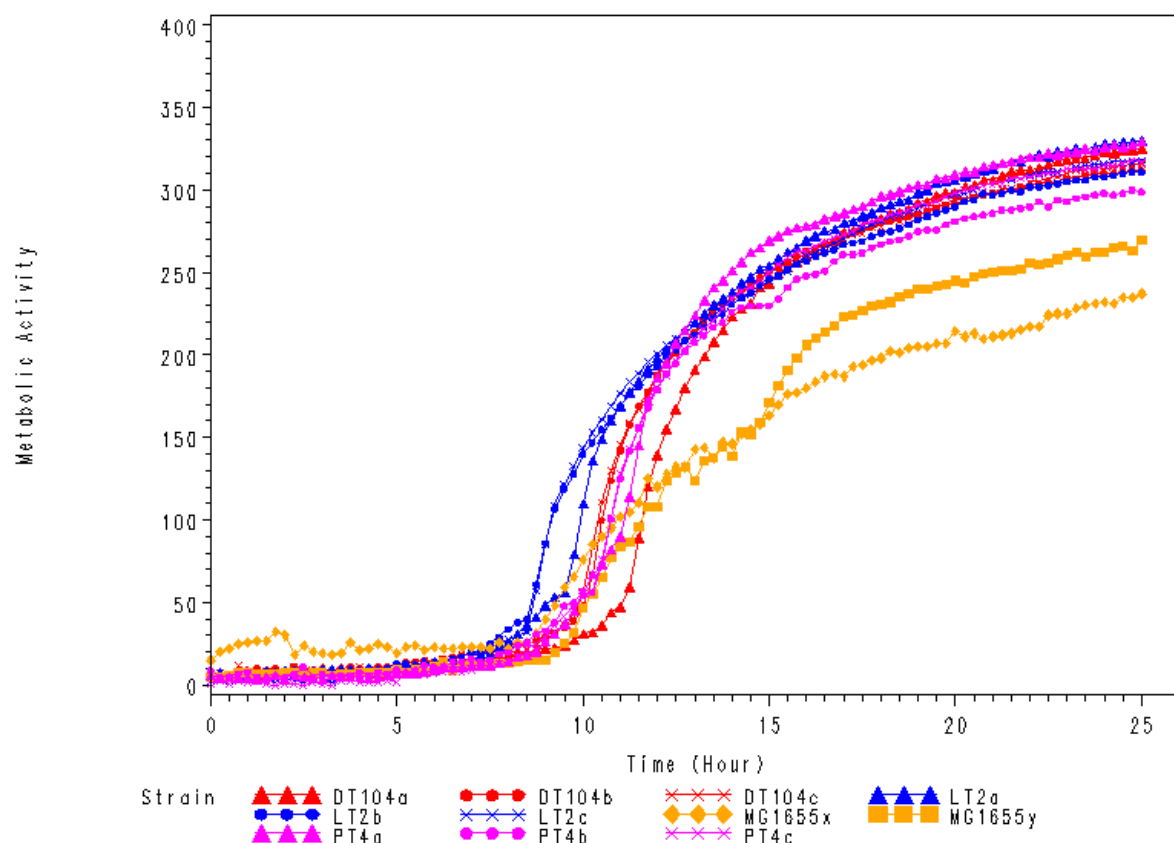

Kinetic Data of Phosphorus Source Utilisation

PM04A, C10 (Cytidine-5'-Monophosphate)

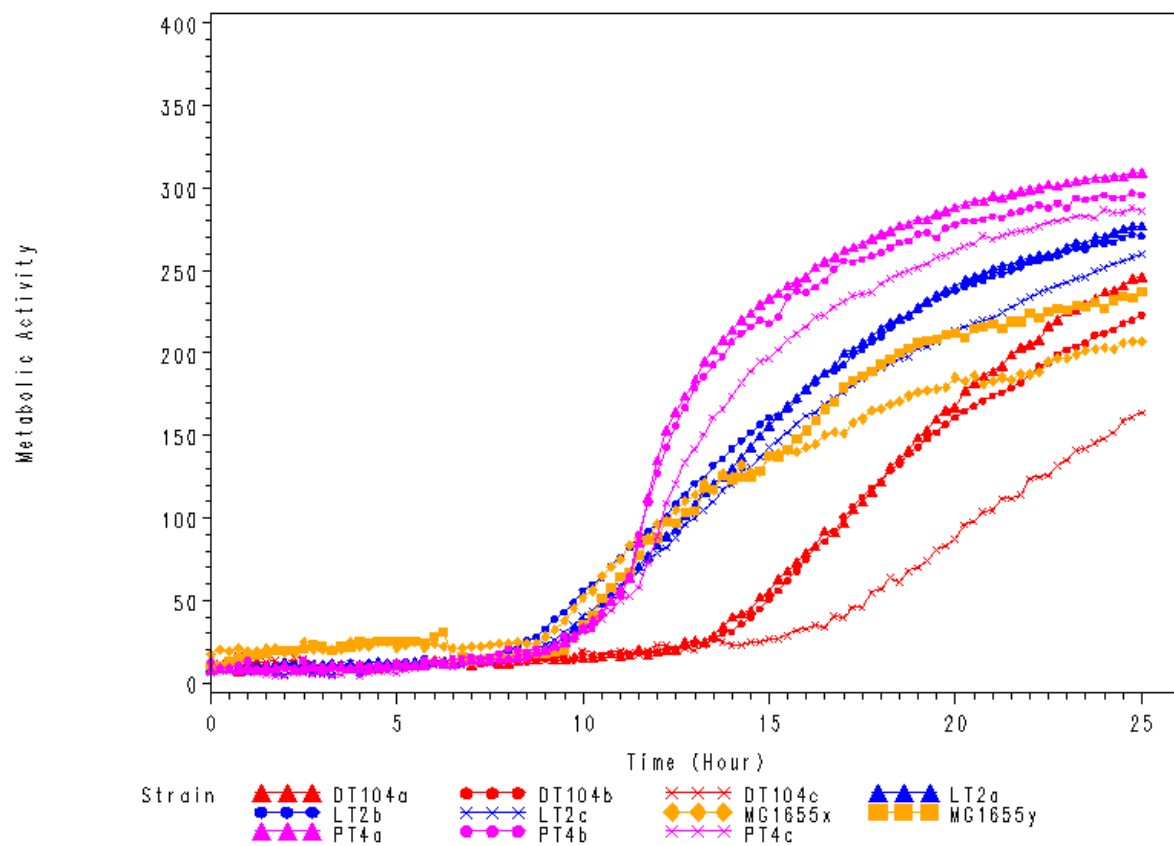

PM04A, C11 (Cytidine-2',3'-Cyclic Monophosphate)

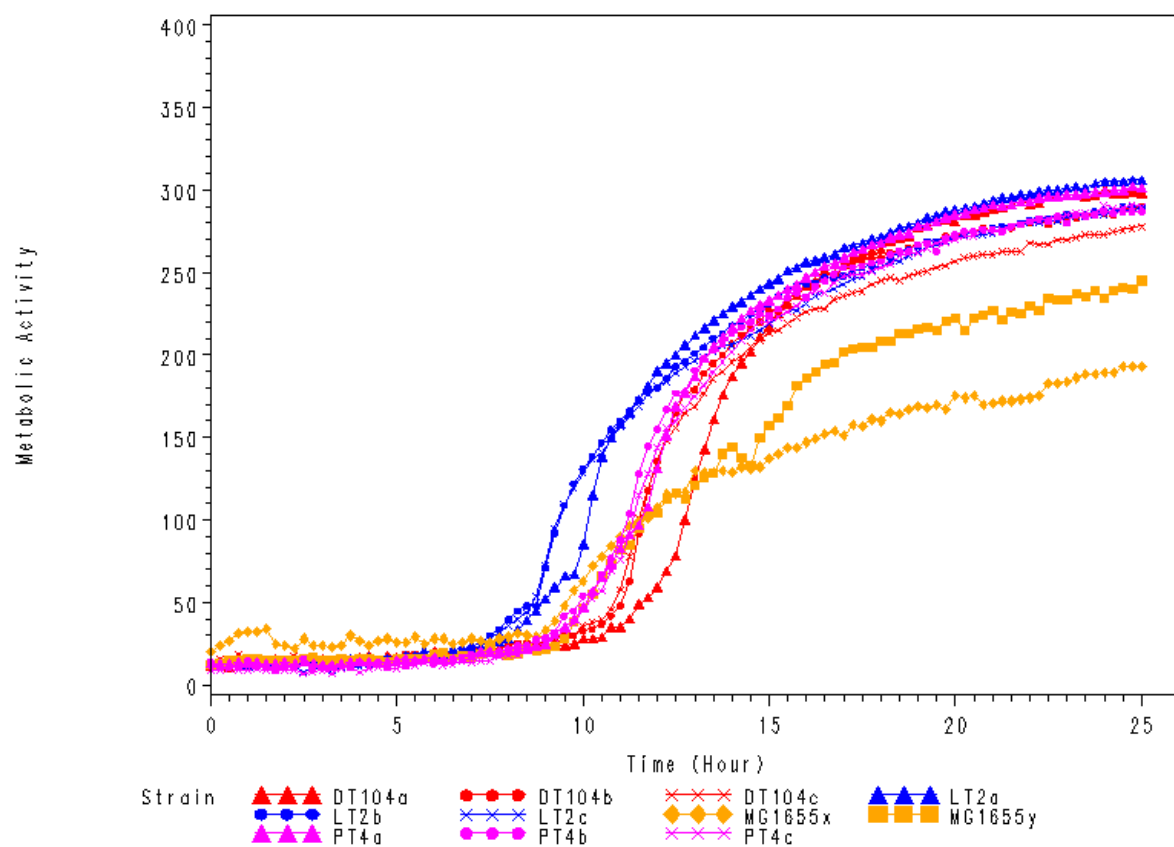

PM04A, C12 (Cytidine-3',5'-Cyclic Monophosphate)

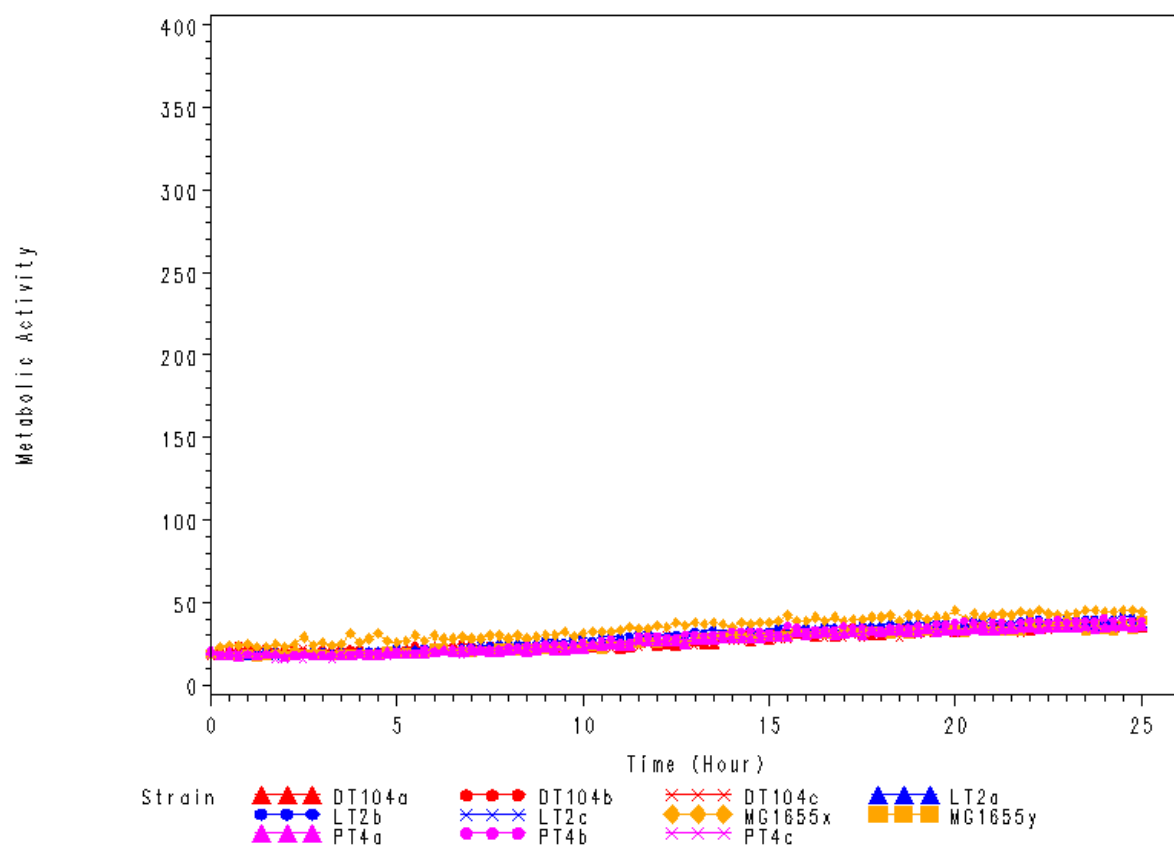

Kinetic Data of Phosphorus Source Utilisation

PM04A, D01 (D-Mannose-1-Phosphate)

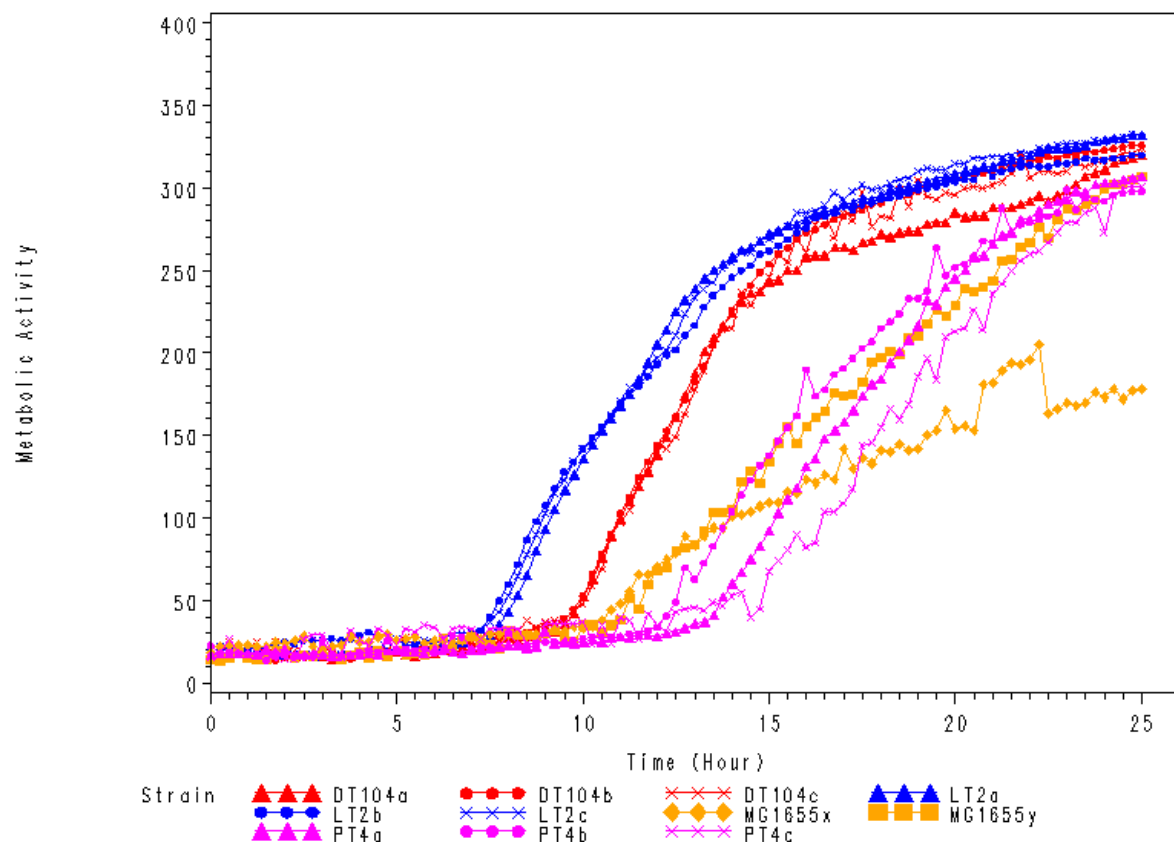

PM04A, D02 (D-Mannose-6-Phosphate)

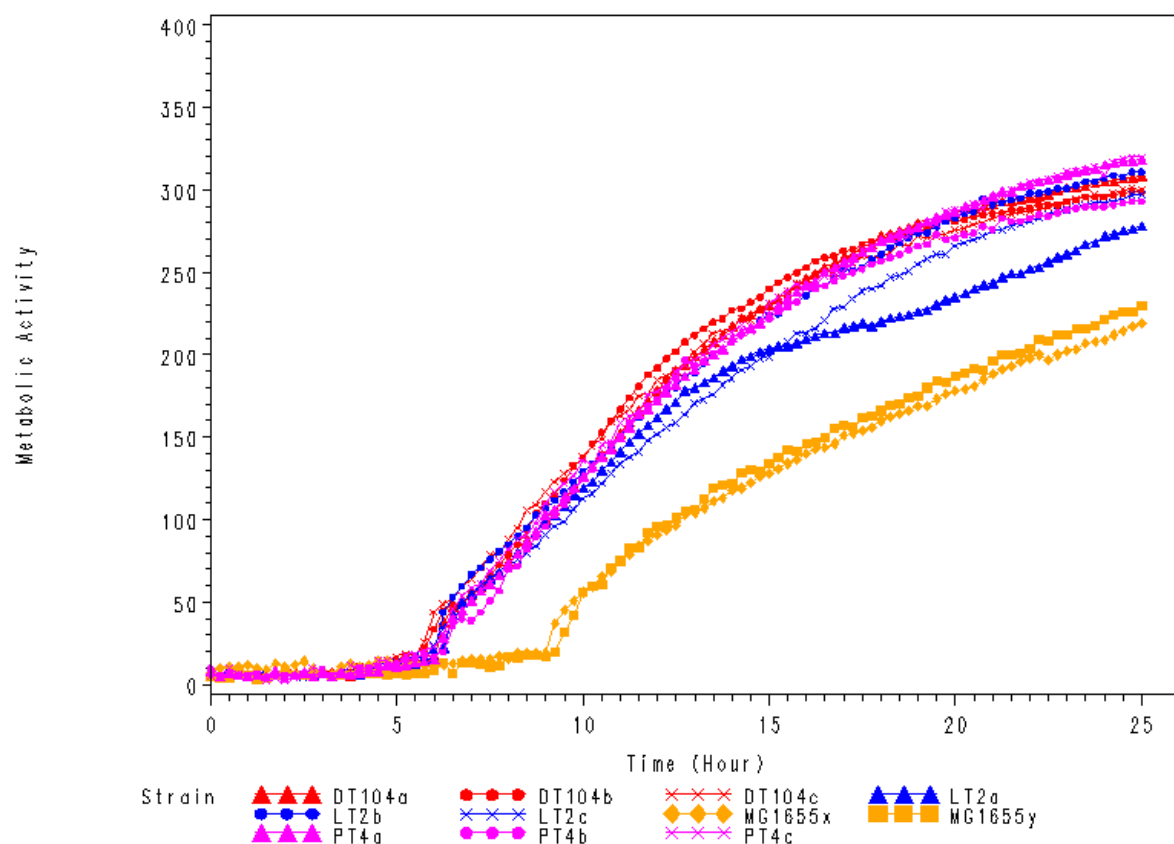

PM04A, D03 (Cysteamine-S-Phosphate)

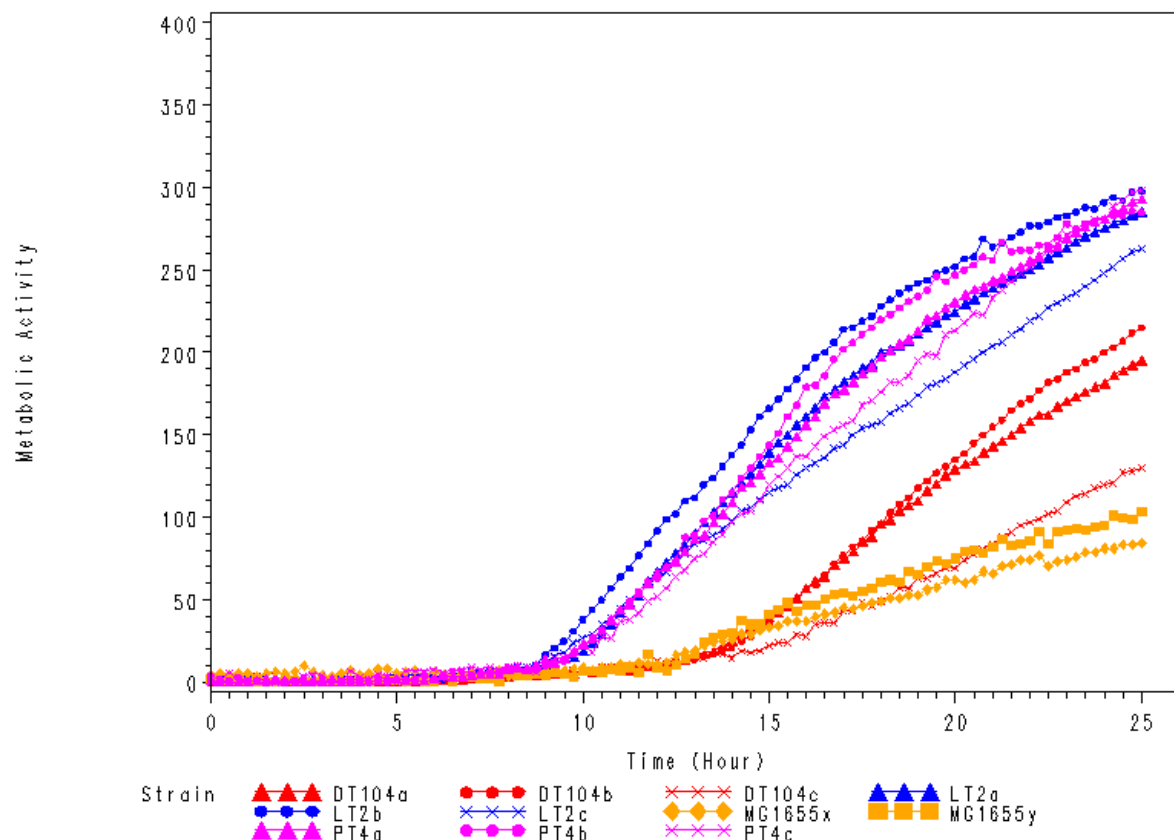

Kinetic Data of Phosphorus Source Utilisation

PM04A, D04 (Phospho-L-Arginine)

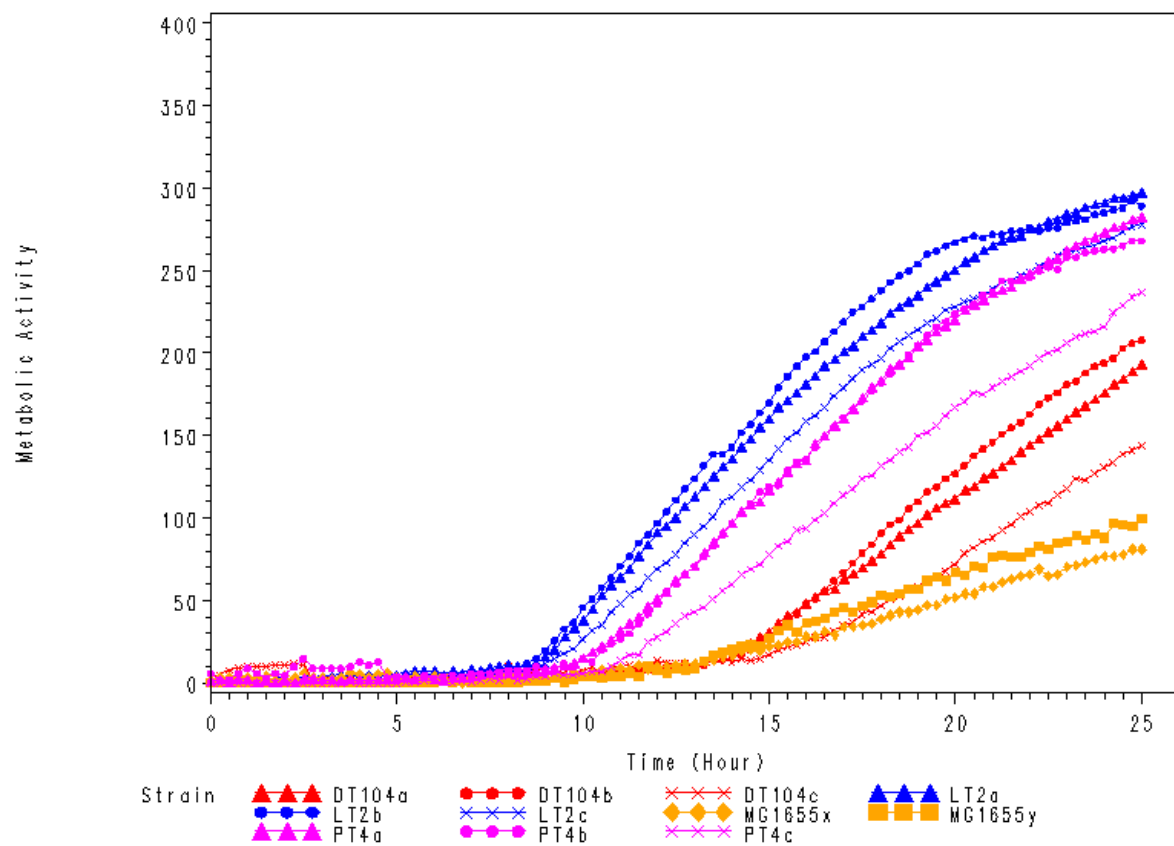

PM04A, D05 (O-Phospho-D-Serine)

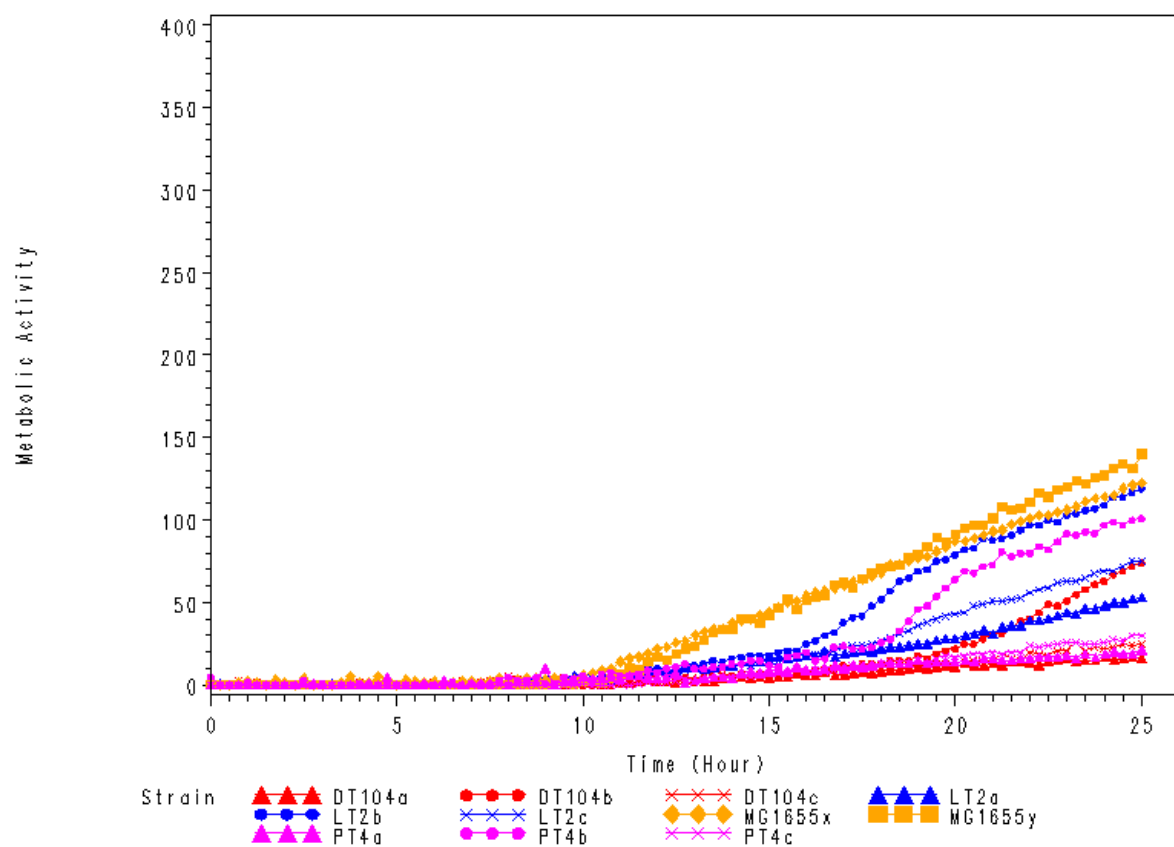

PM04A, D06 (O-Phospho-L-Serine)

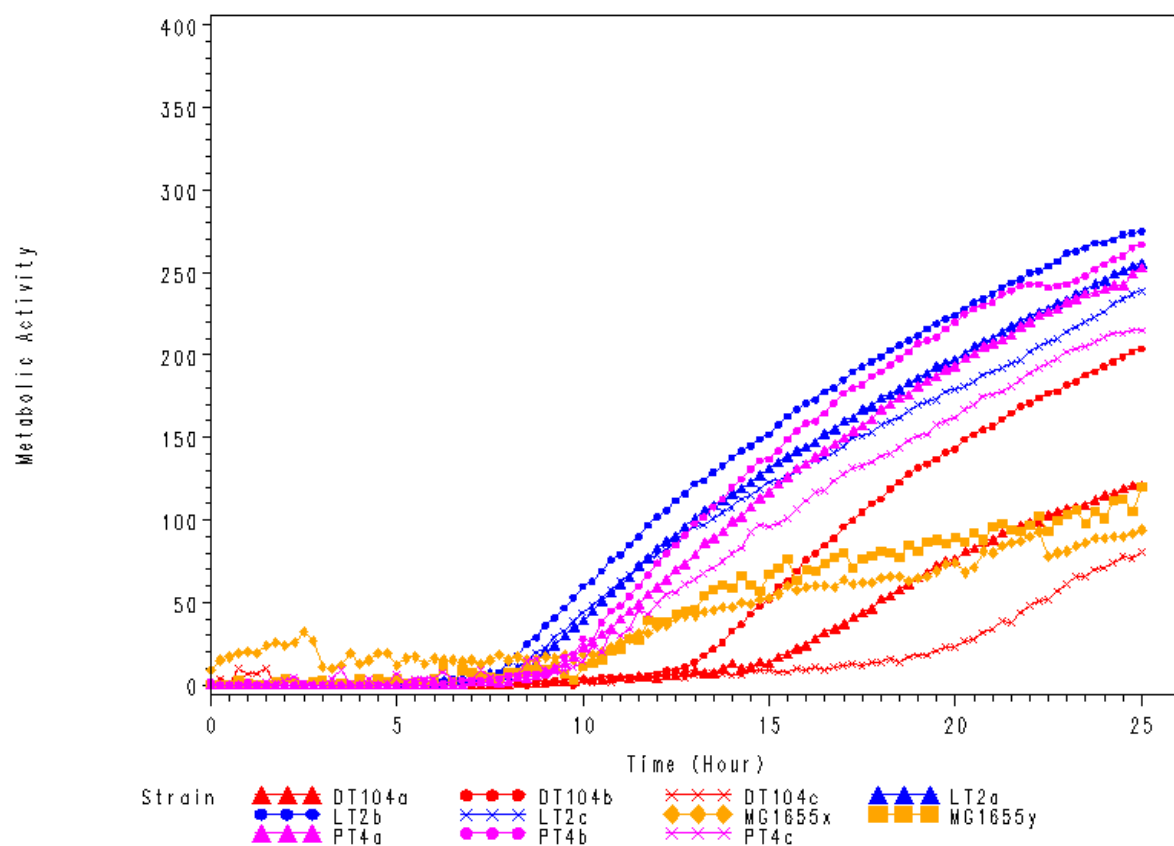

Kinetic Data of Phosphorus Source Utilisation

PM04A, D07 (O-Phospho-L-Threonine)

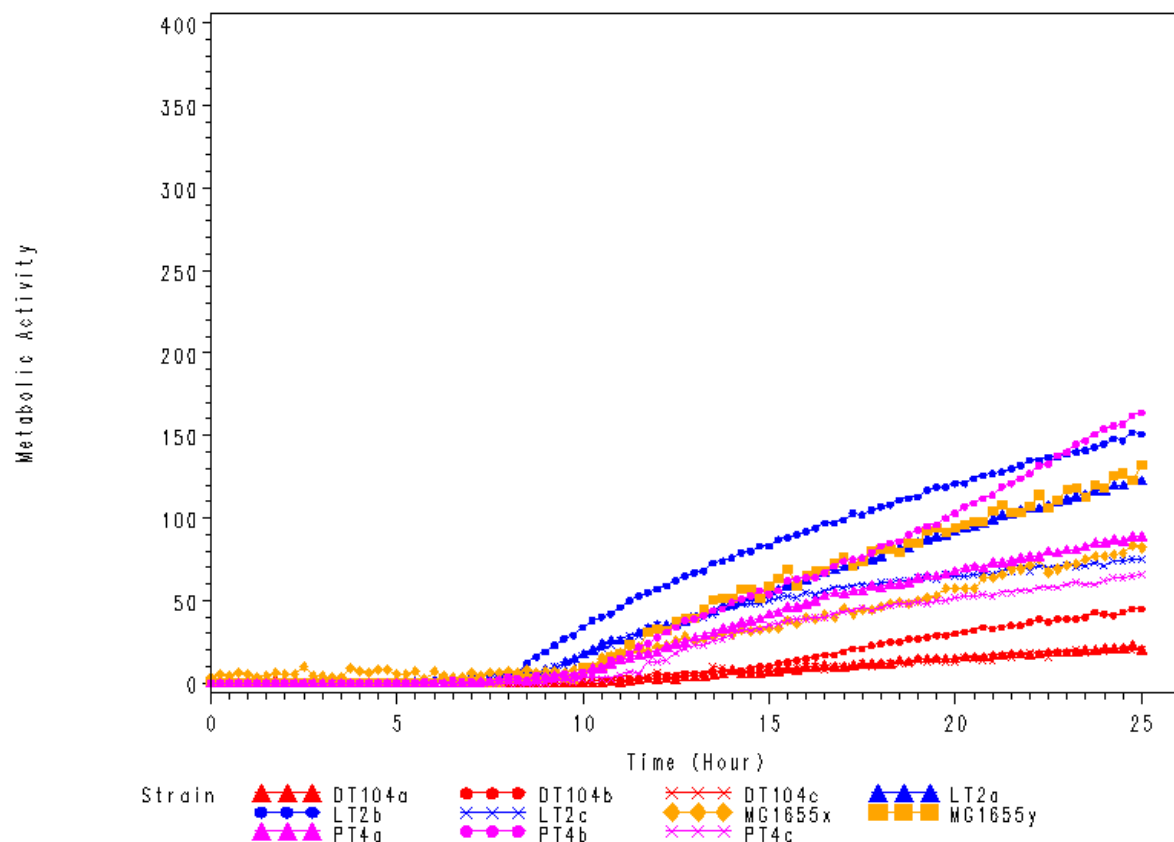

PM04A, D08 (Uridine-2Æ-Monophosphate)

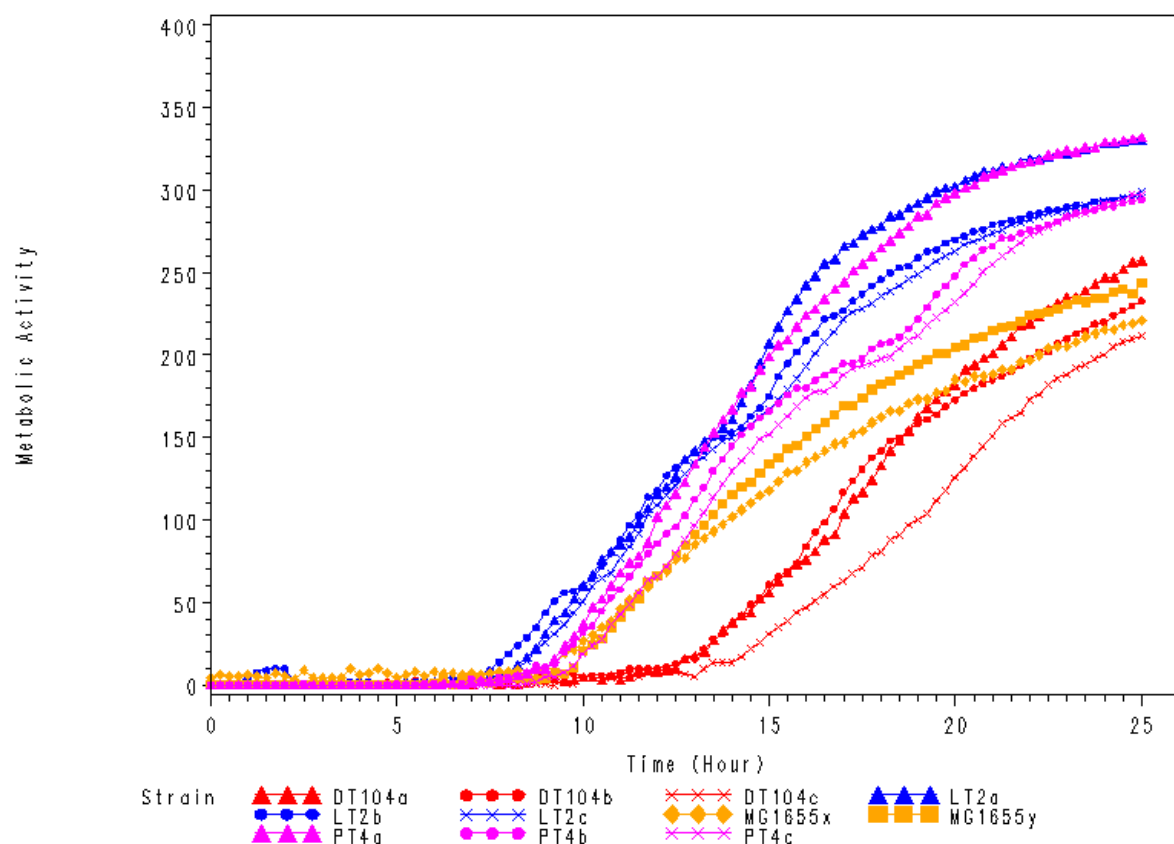

PM04A, D09 (Uridine-3Æ-Monophosphate)

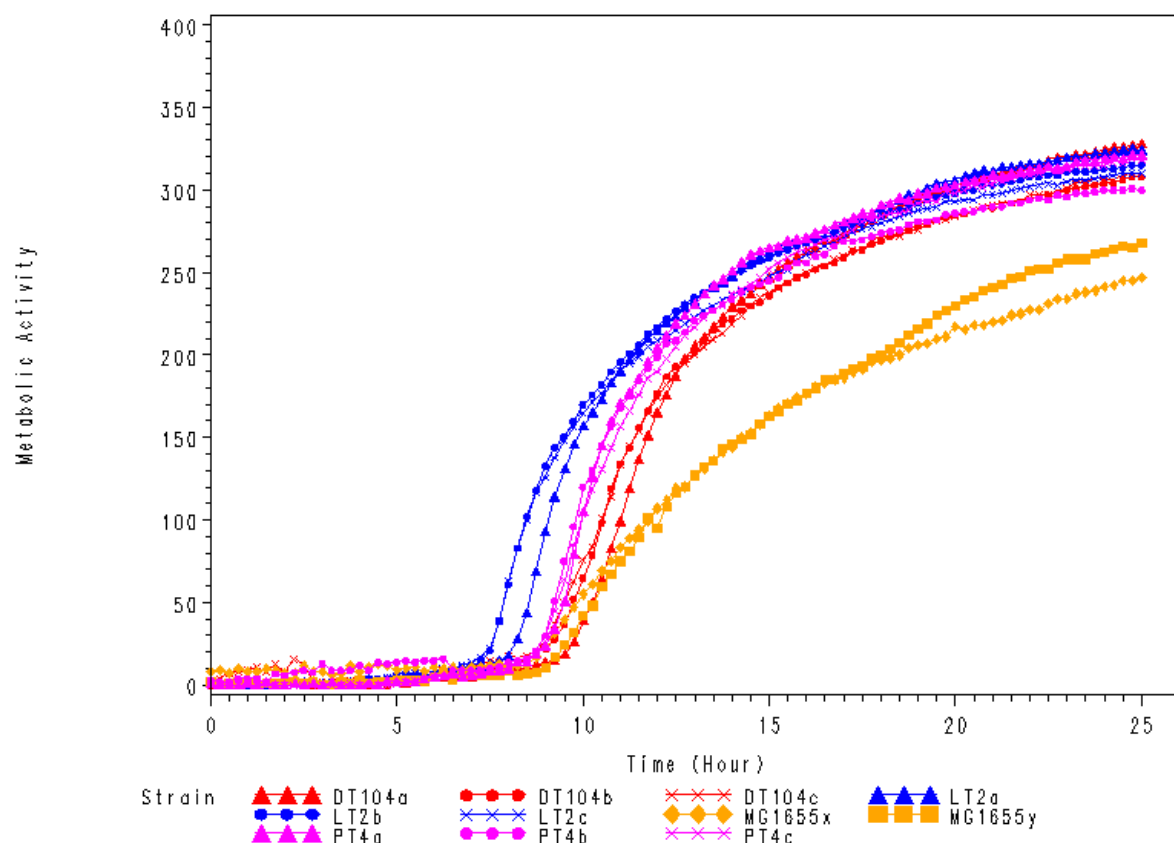

Kinetic Data of Phosphorus Source Utilisation

PM04A, D10 (Uridine- 5'Æ- Monophosphate)

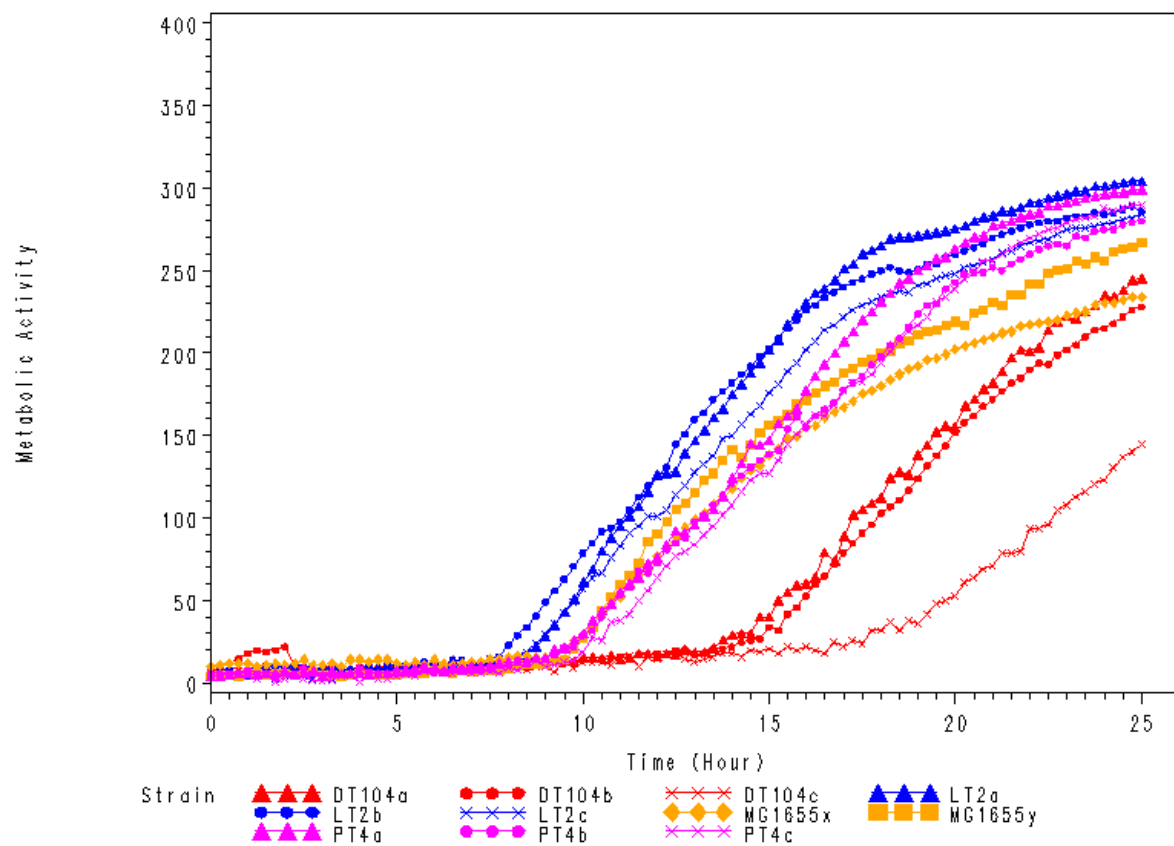

PM04A, D11 (Uridine- 2'Æ,3'Æ- Cyclic Monophosphate)

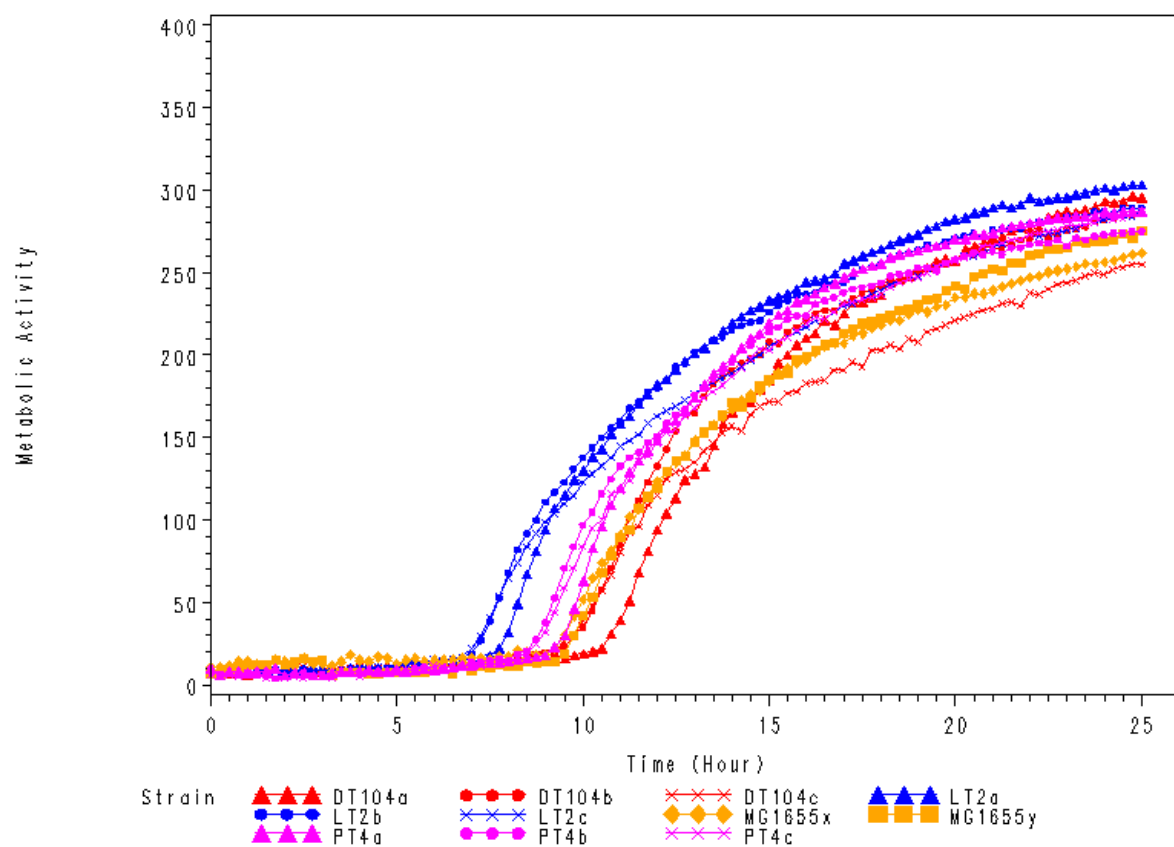

PM04A, D12 (Uridine- 3'Æ,5'Æ- Cyclic Monophosphate)

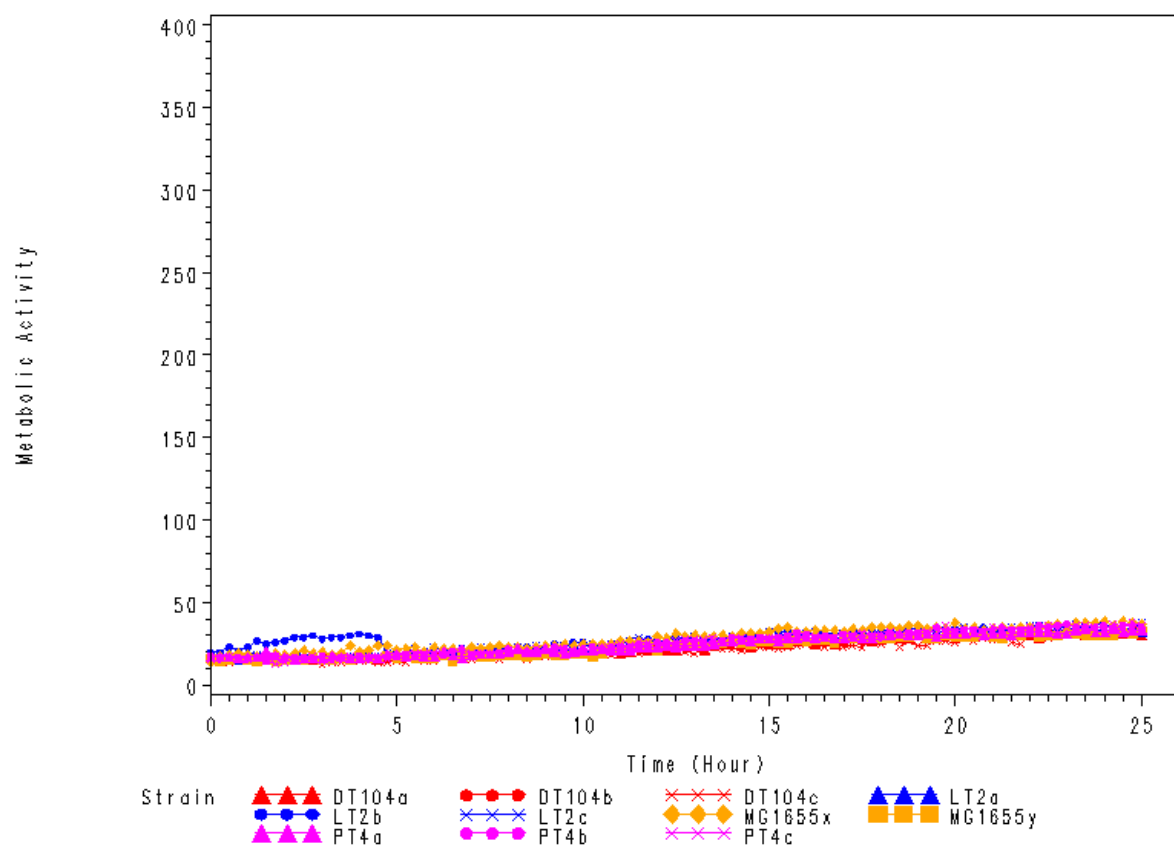



Kinetic Data of Phosphorus Source Utilisation

PM04A, E01 (O-Phospho-D-Tyrosine)

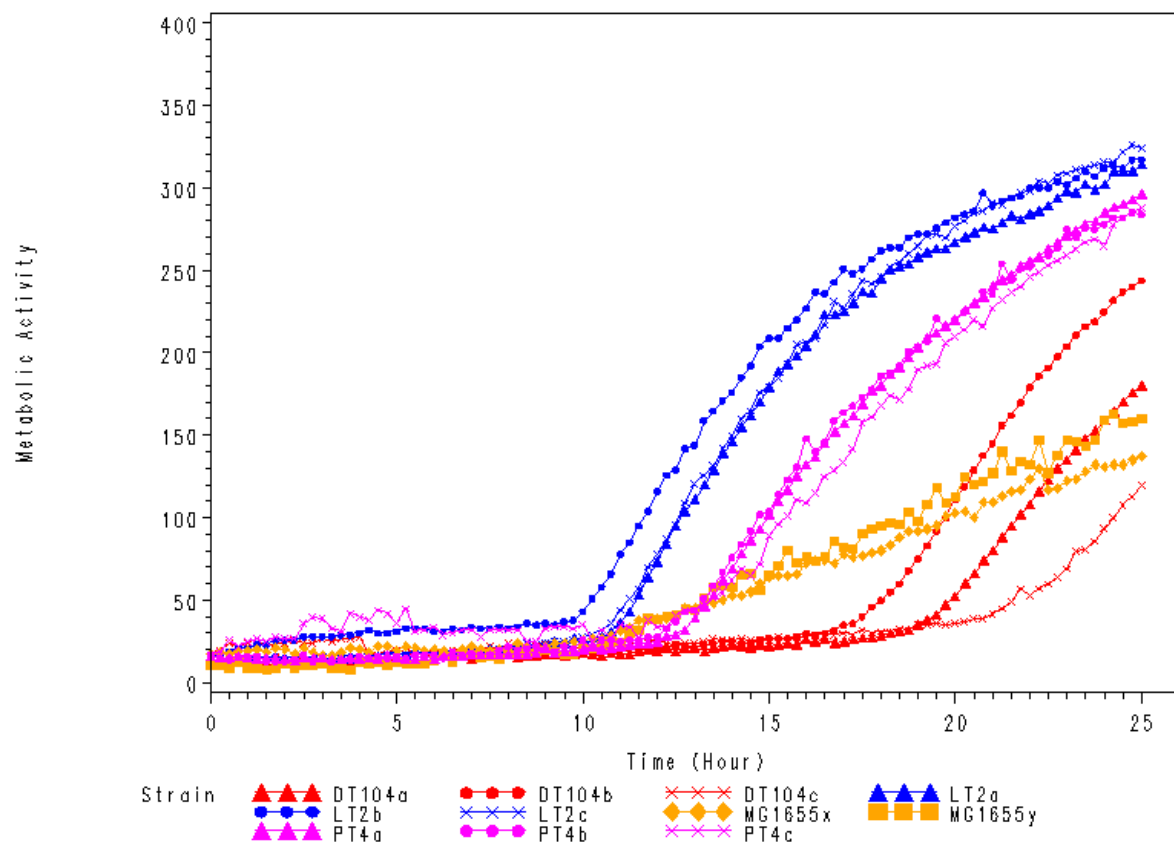

PM04A, E02 (O-Phospho-L-Tyrosine)

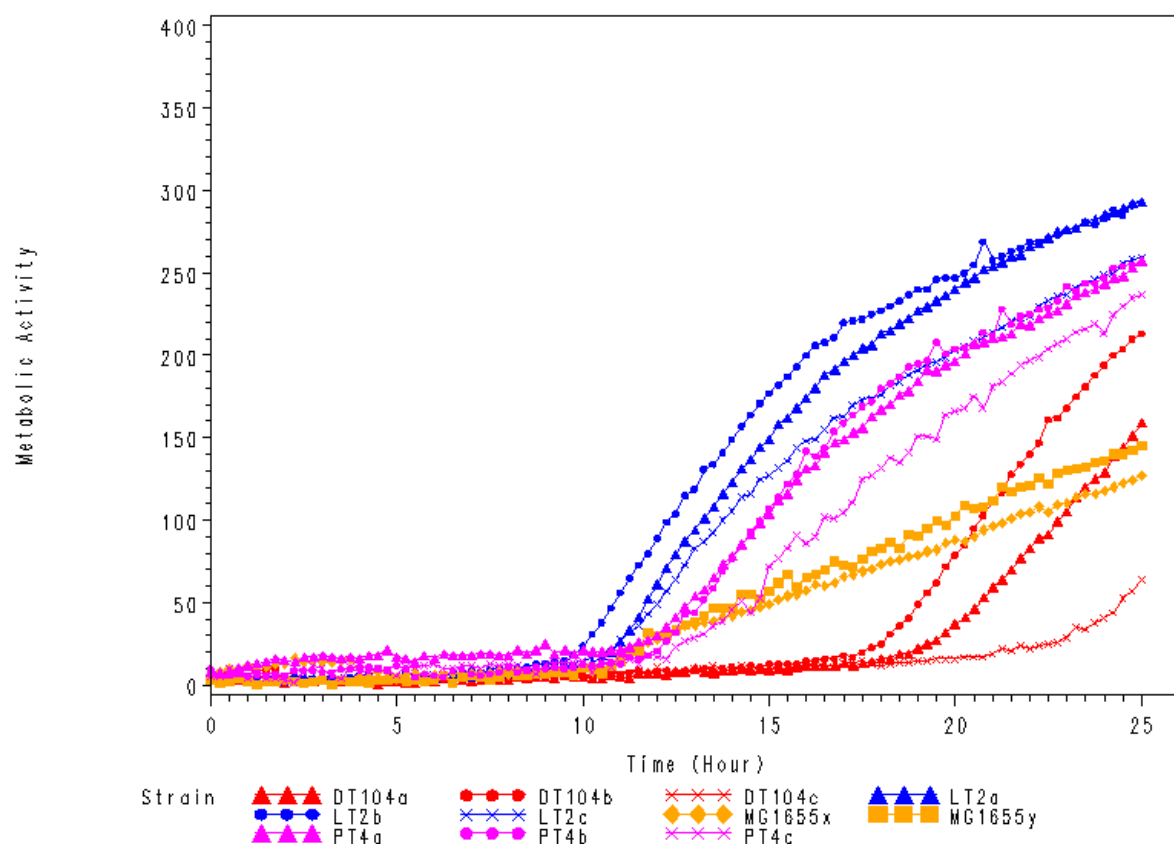

PM04A, E03 (Phosphocreatine)

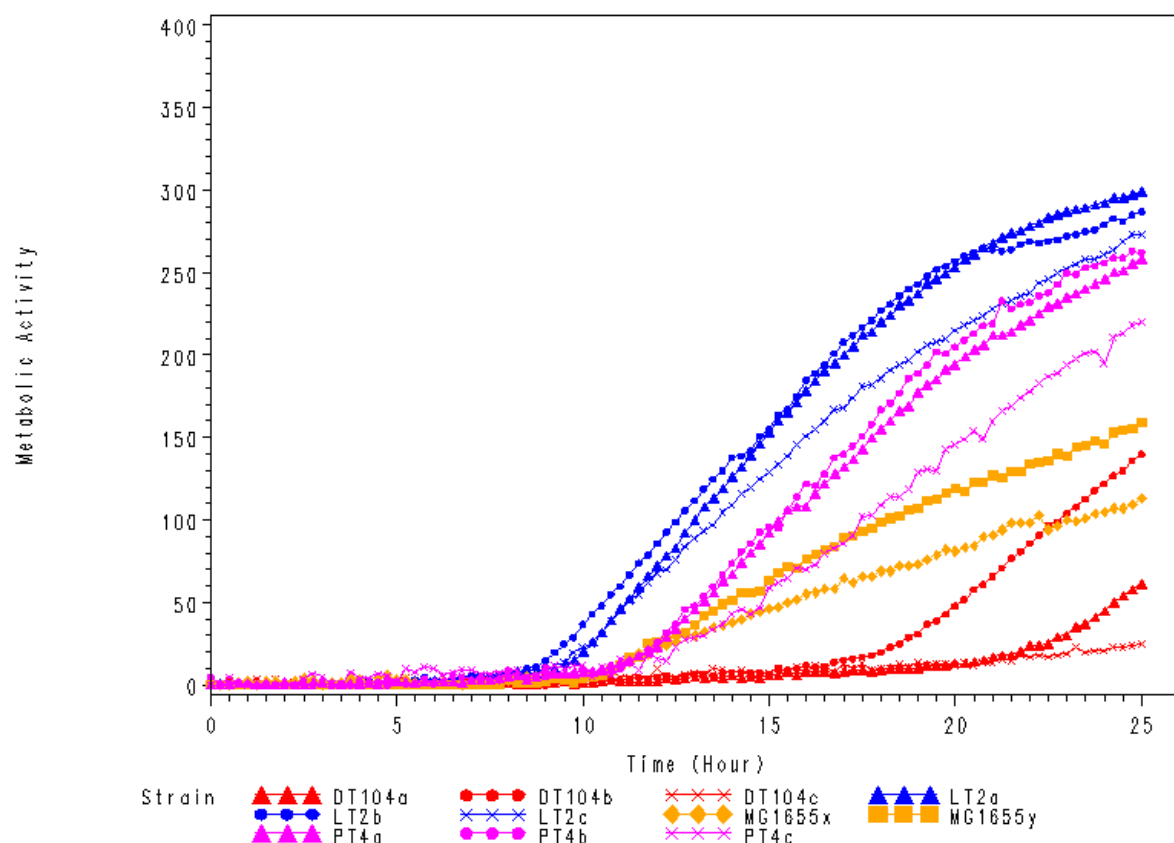

Kinetic Data of Phosphorus Source Utilisation

PM04A, E04 (Phosphoryl Choline)

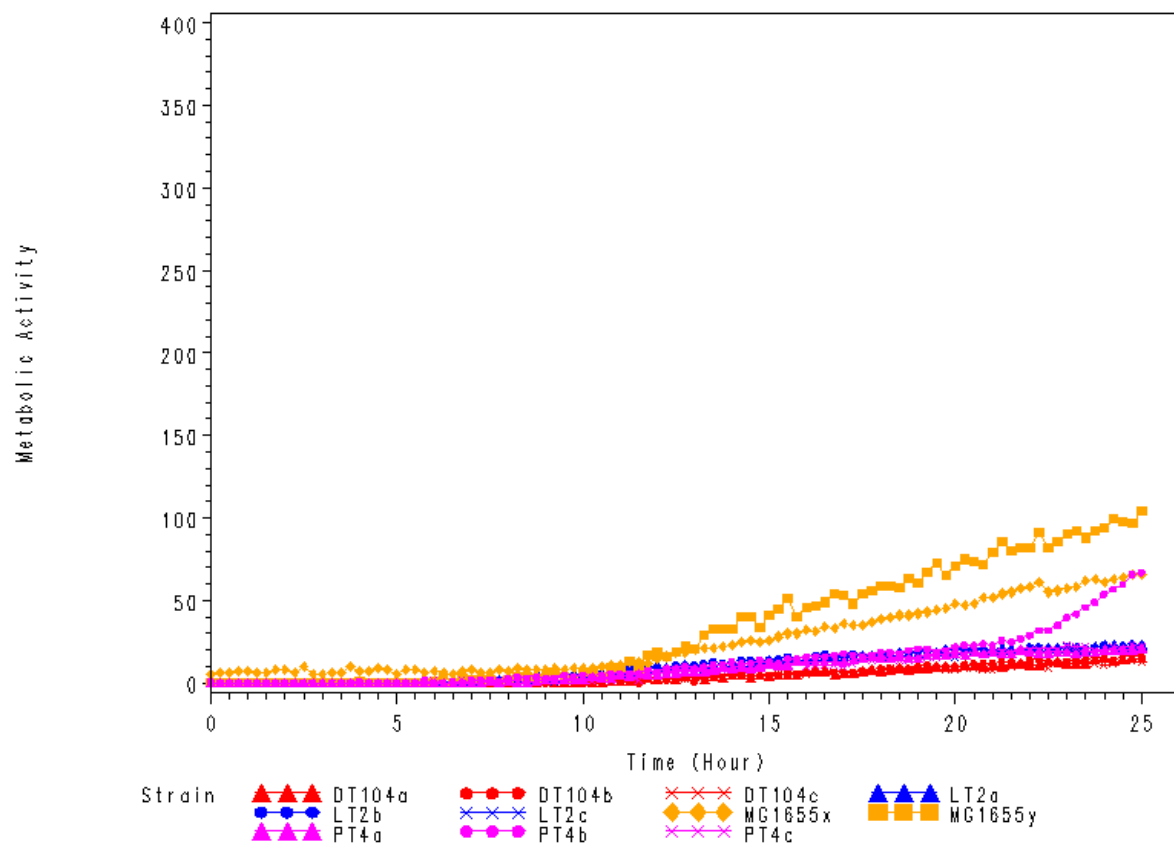

PM04A, E05 (O-Phosphoryl-Ethanolamine)

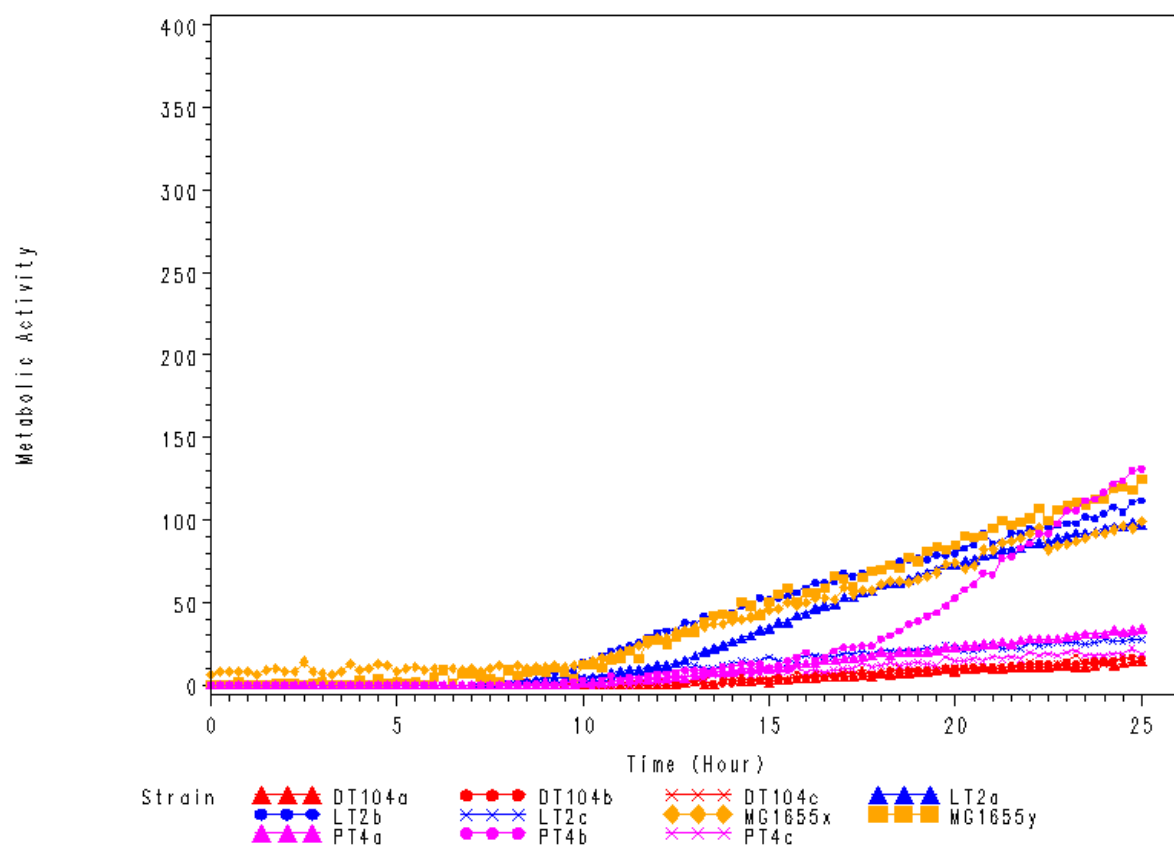

PM04A, E06 (Phosphono Acetic Acid)

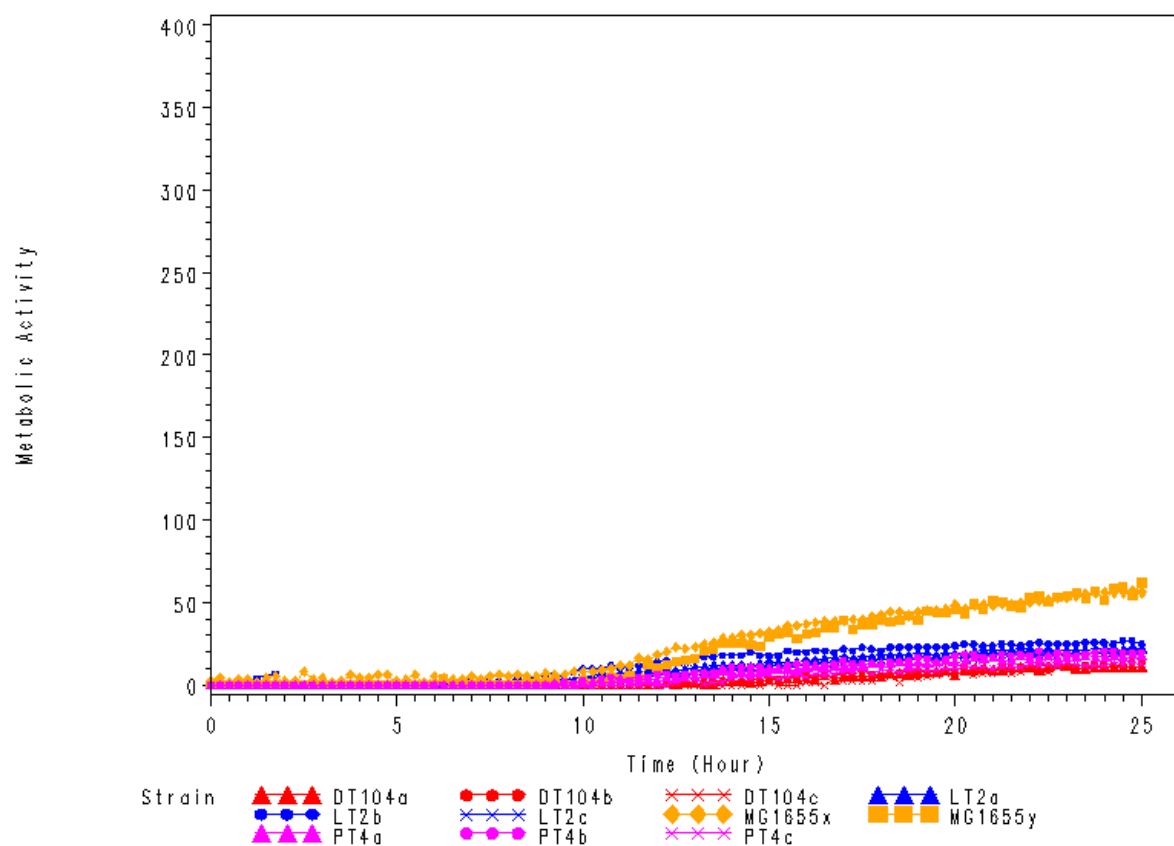

Kinetic Data of Phosphorus Source Utilisation

PM04A, E07 (2-Aminoethyl Phosphonic Acid)

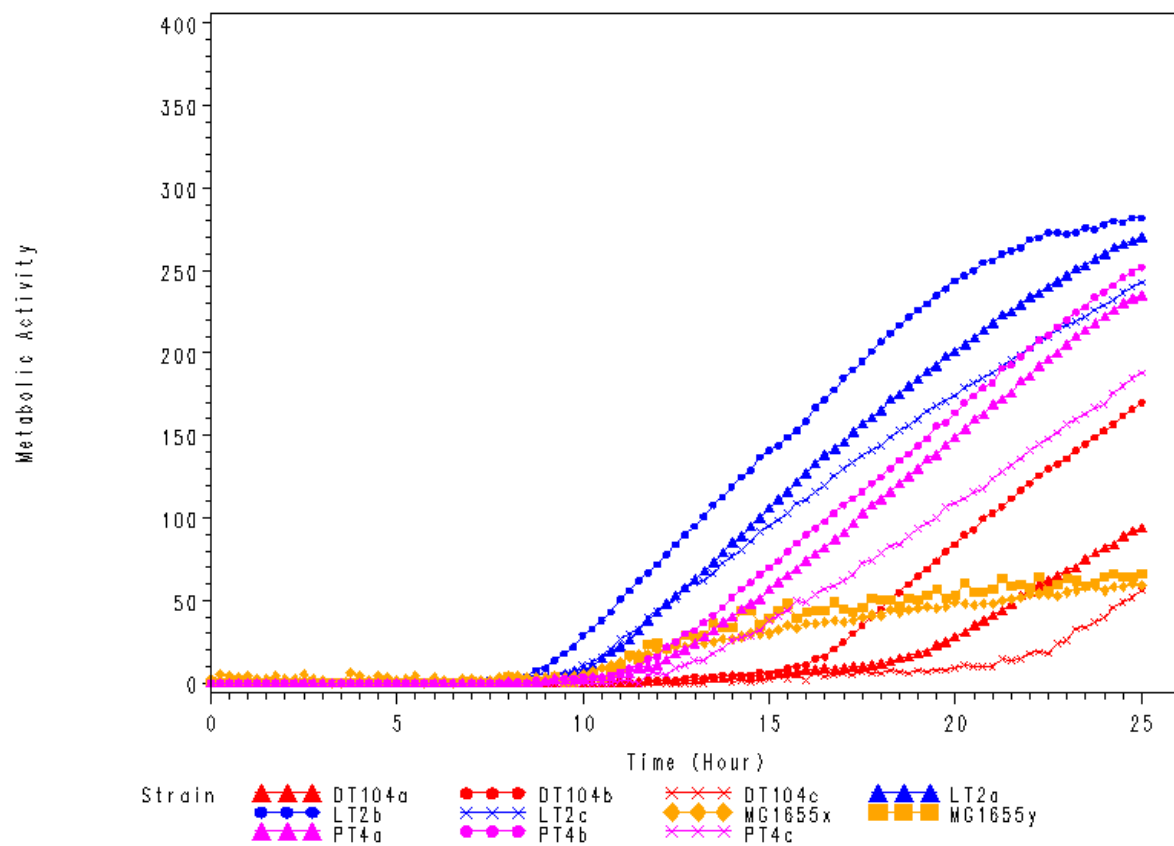

PM04A, E08 (Methylene Diphosphonic Acid)

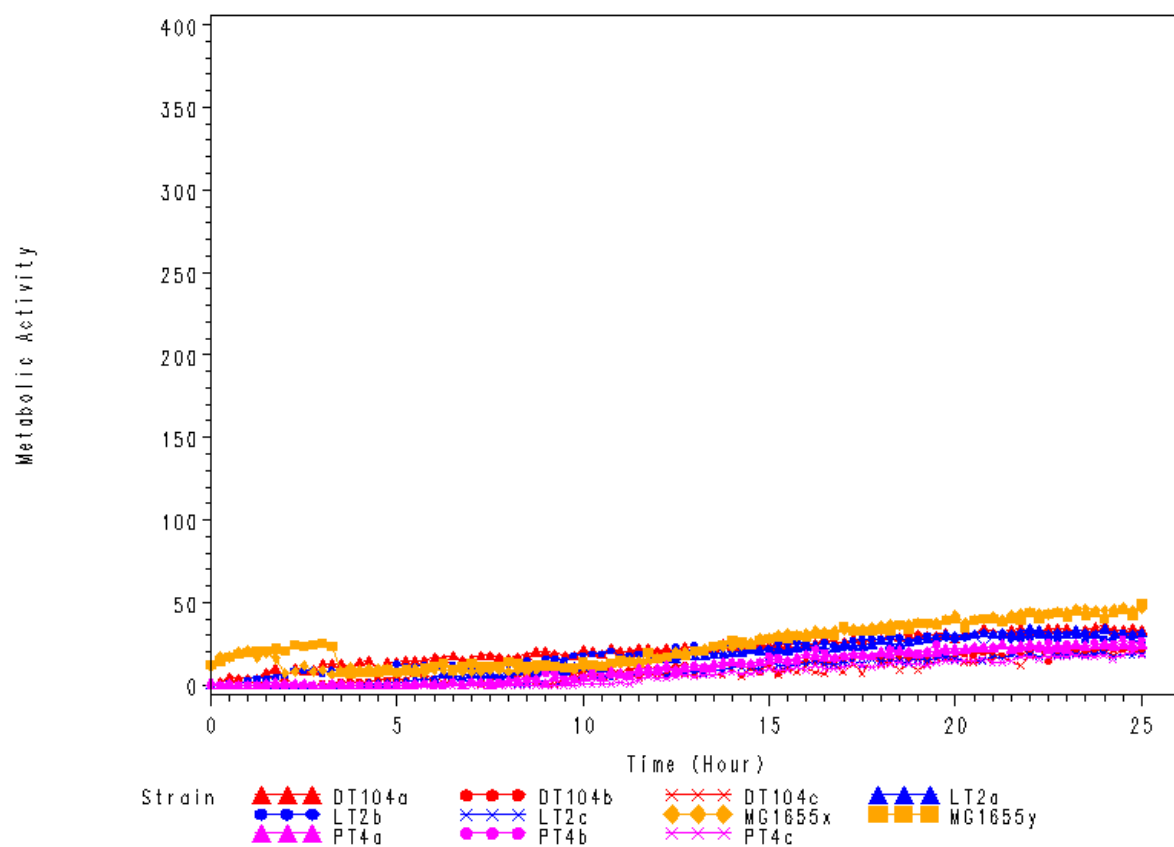

PM04A, E09 (Thymidine-3 $\beta$ -Monophosphate)

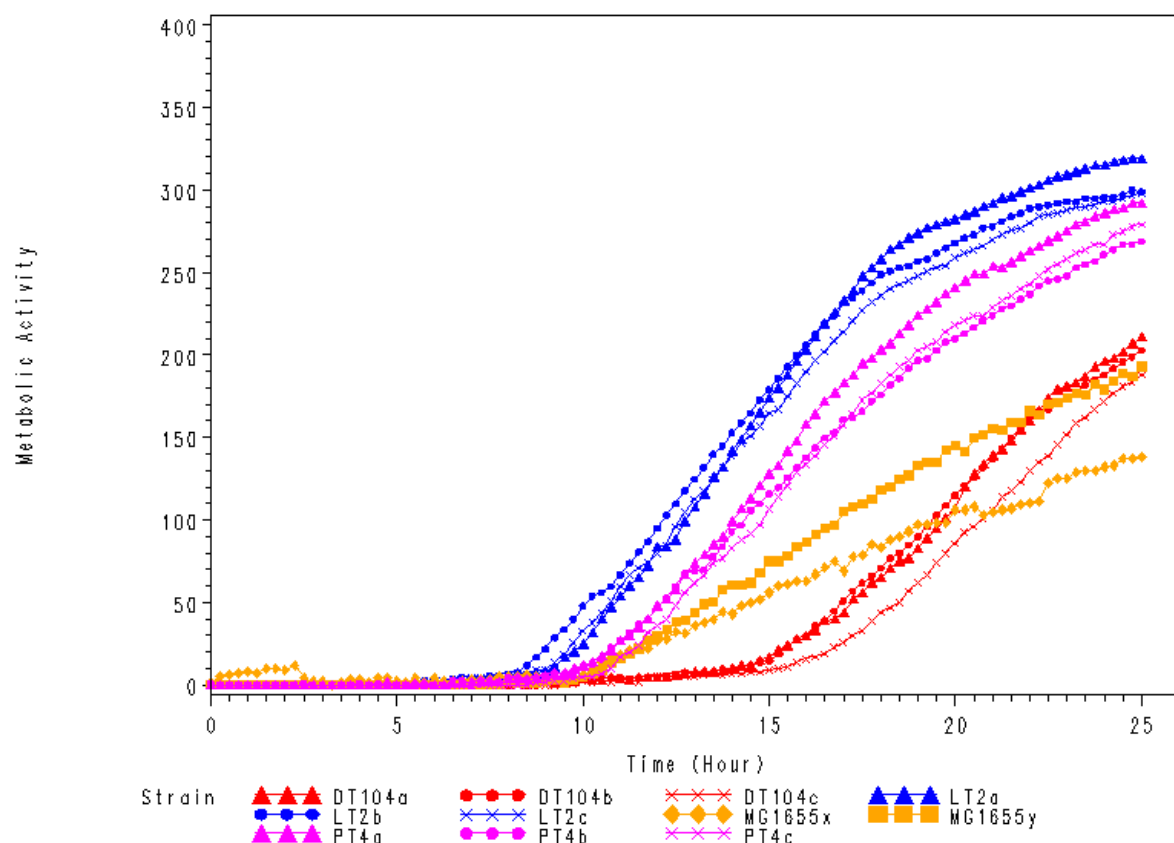

PM04A, E10 (Thymidine- 5' - Monophosphate)

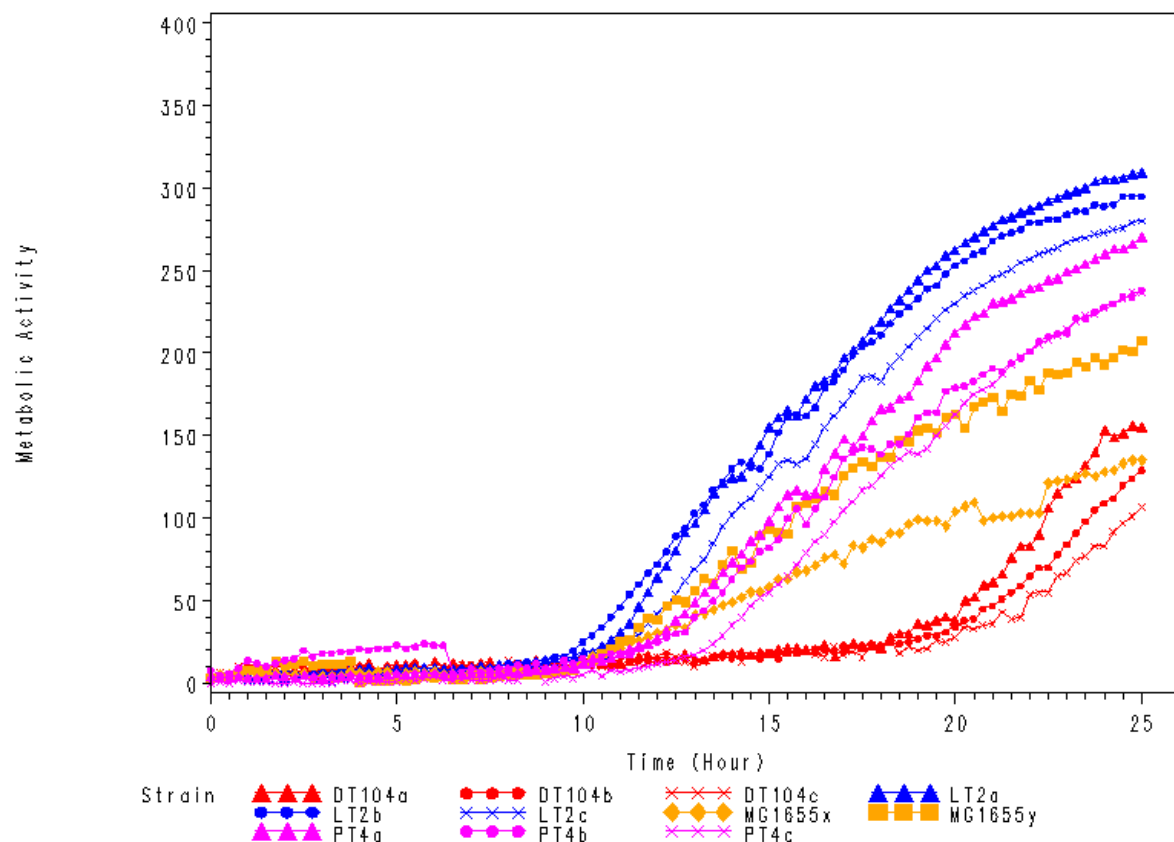

PM04A, E11 (Inositol Hexaphosphate)

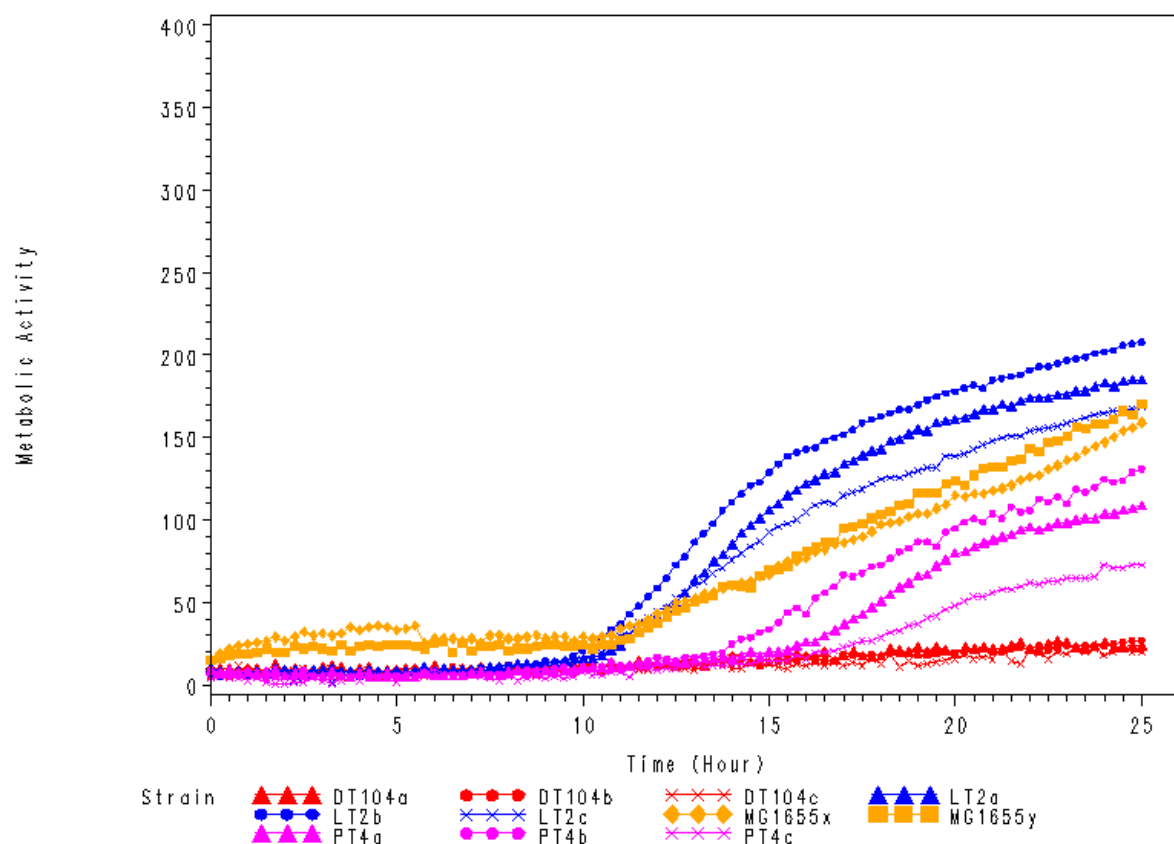

PM04A, E12 (Thymidine 3',5' - Cyclic Monophosphate)

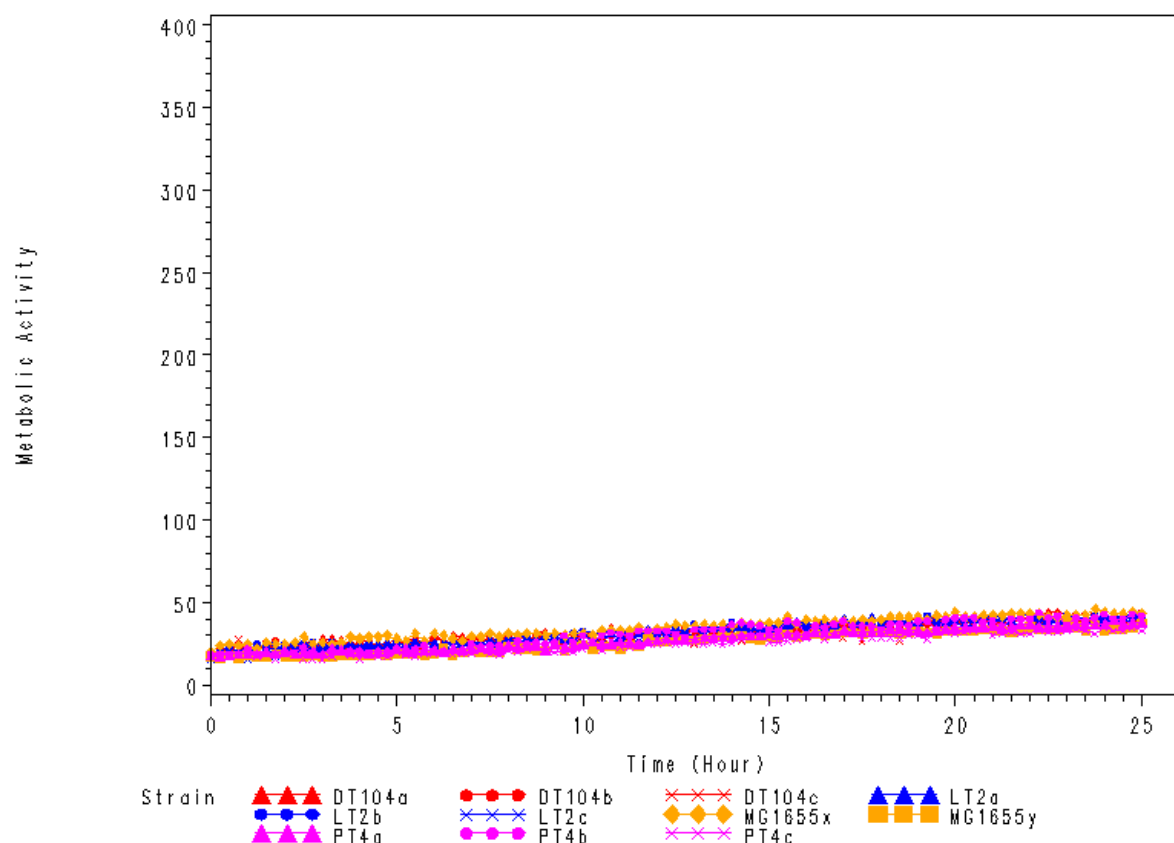

Supplement: supp_M109.005868_jbc.M109.005868-3.pdf [file supp_M109.005868_jbc.M109.005868-3.pdf]
