# Supplementary material
Source: PubMed Central journal article supplement (PMC2785581)

Kinetic Data of Sulphur Source Utilisation

PM04A, F01 (Negative Control)

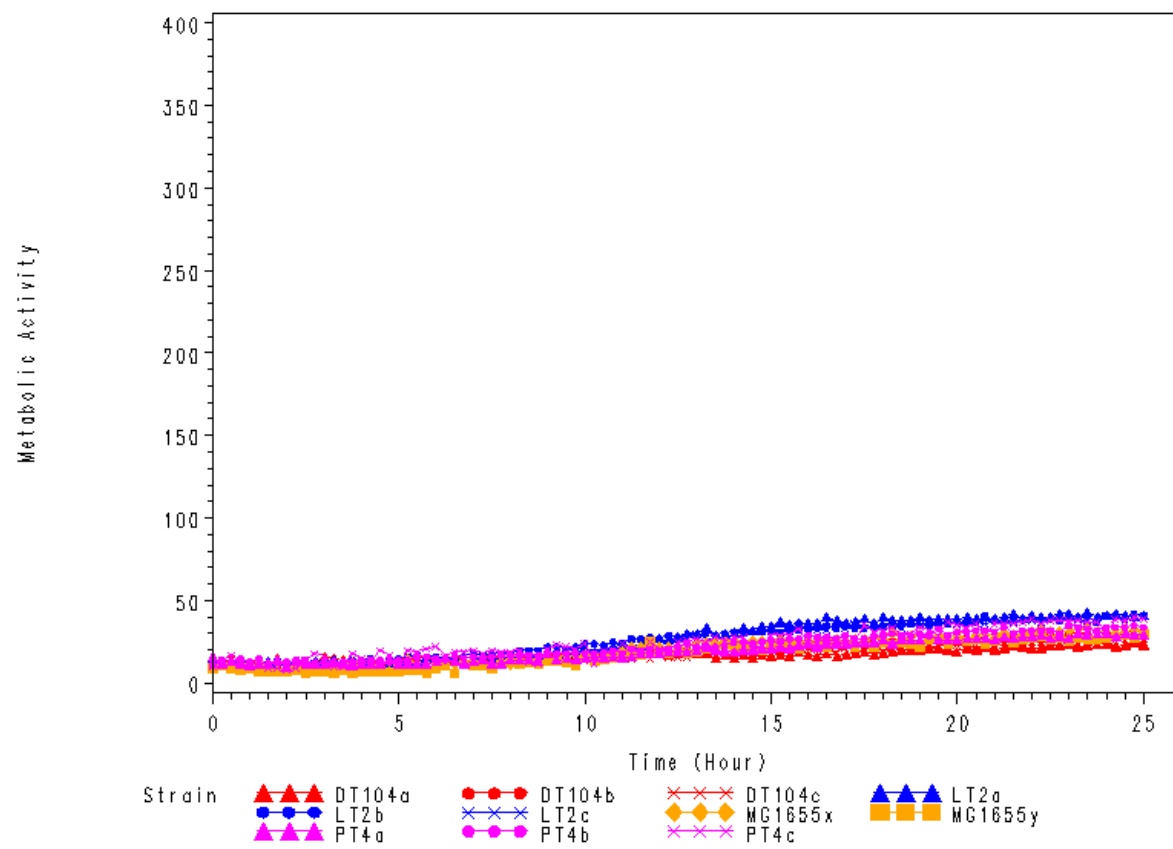

PM04A, F02 (Sulfate)

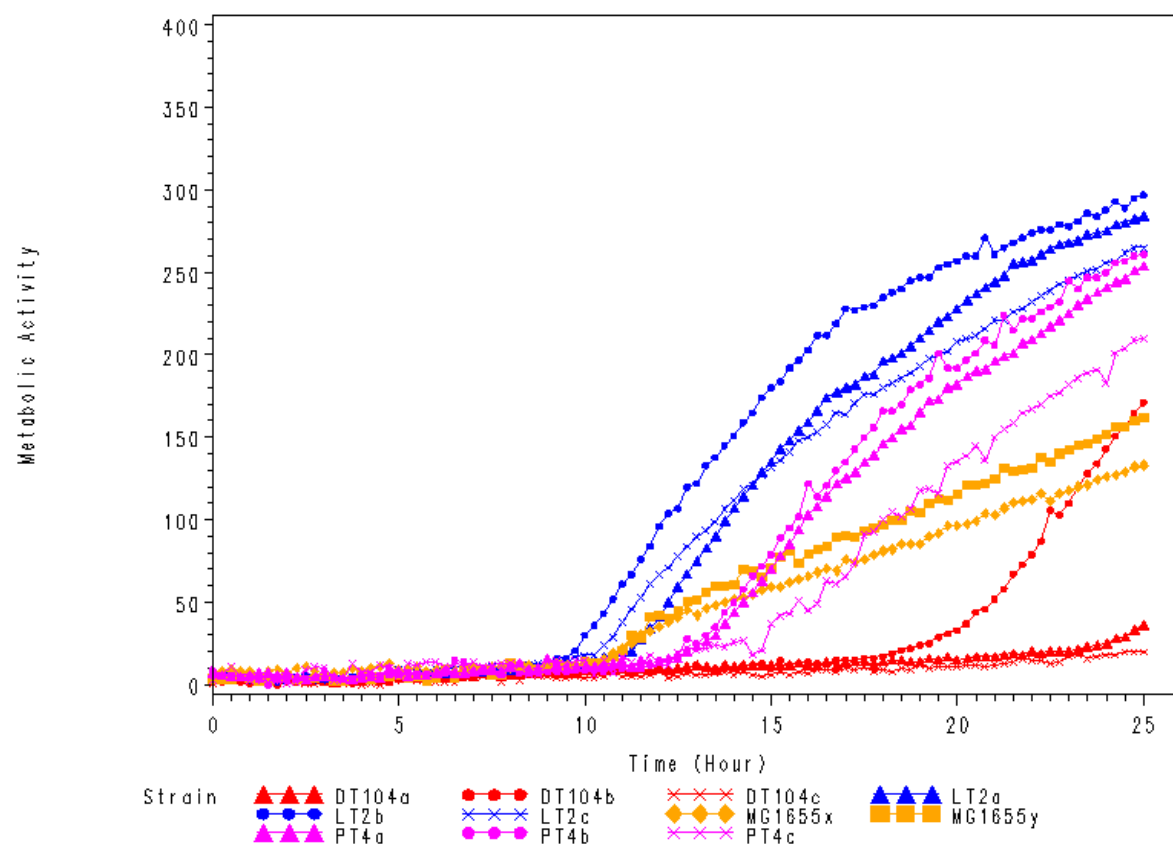

PM04A, F03 (Thiosulfate)

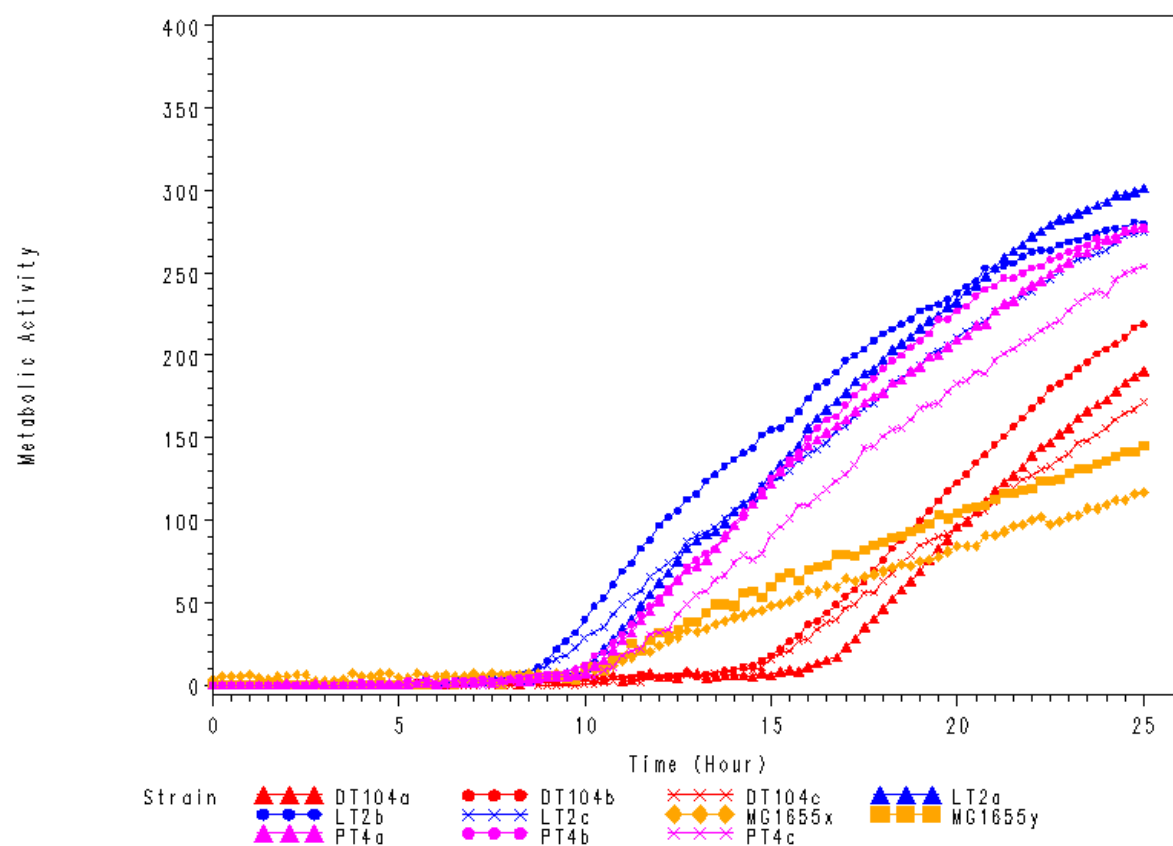

Kinetic Data of Sulphur Source Utilisation

PM04A, F04 (Tetrathionate)

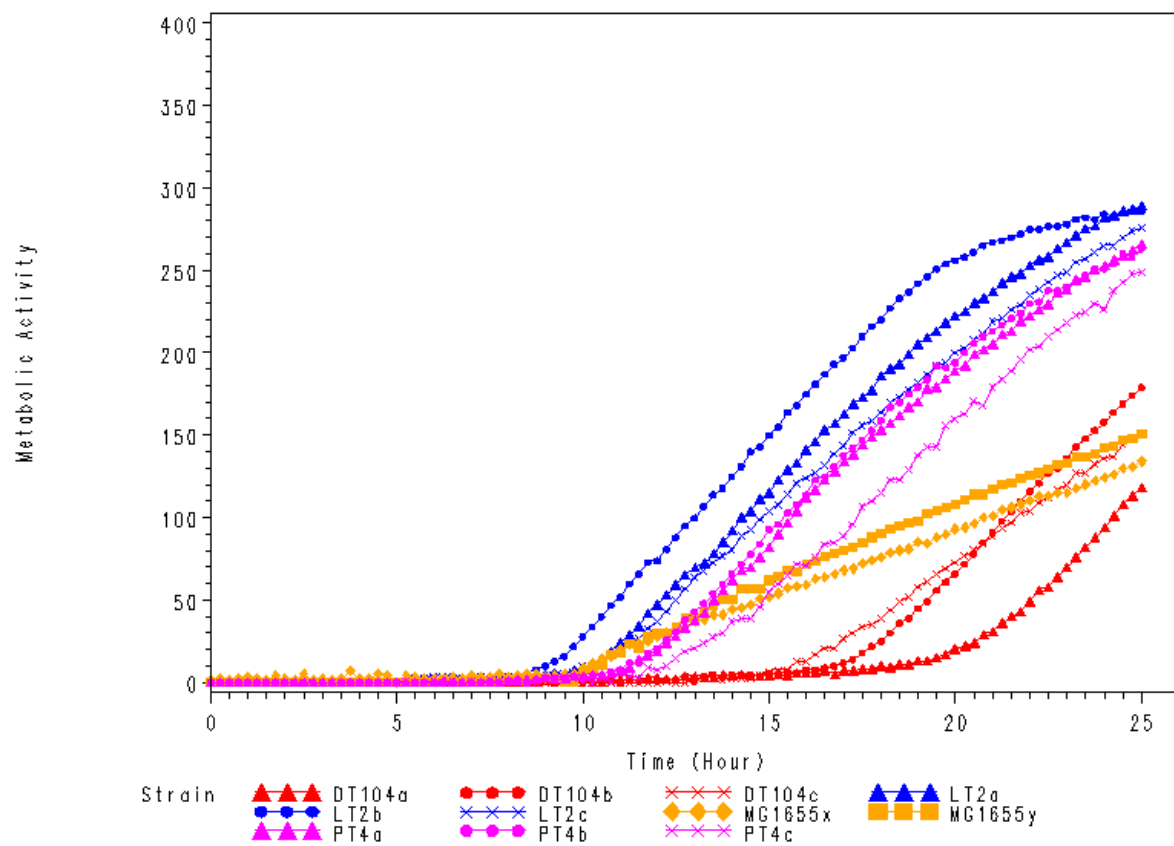

PM04A, F05 (Thiophosphate)

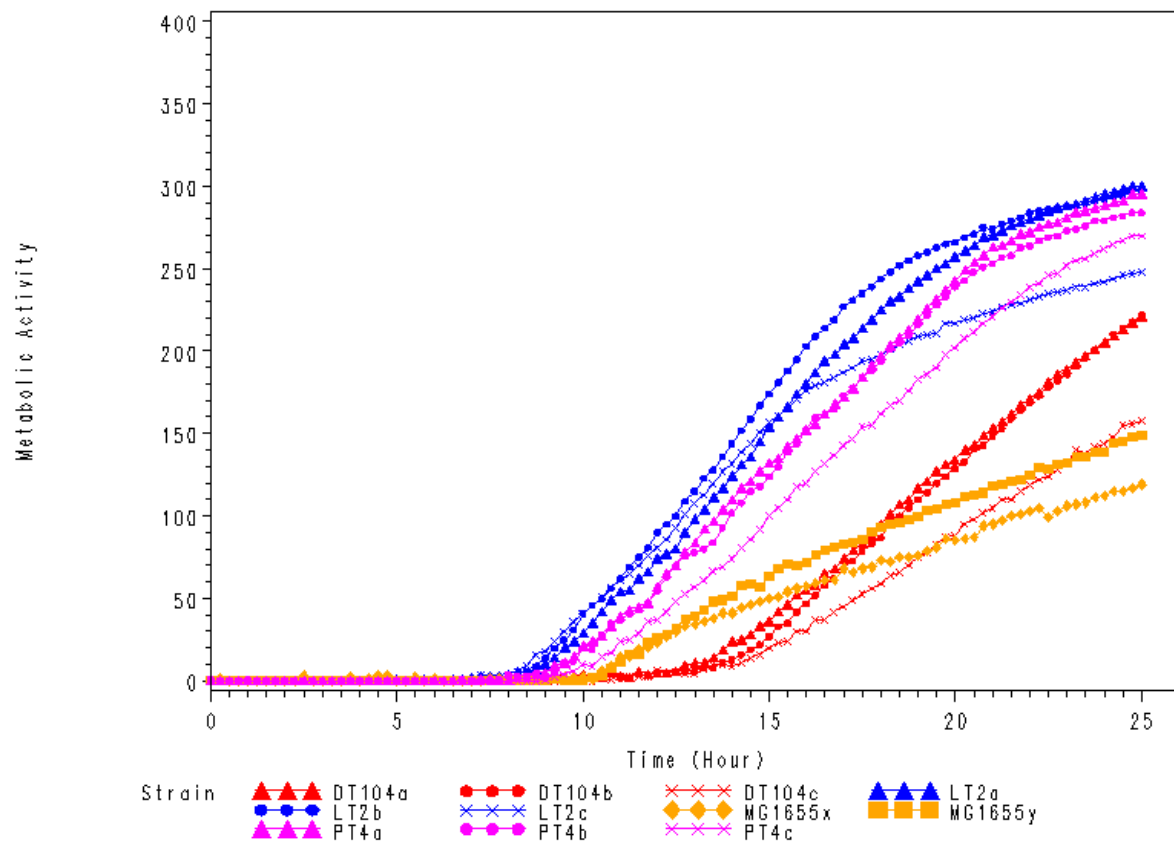

PM04A, F06 (Dithiophosphate)

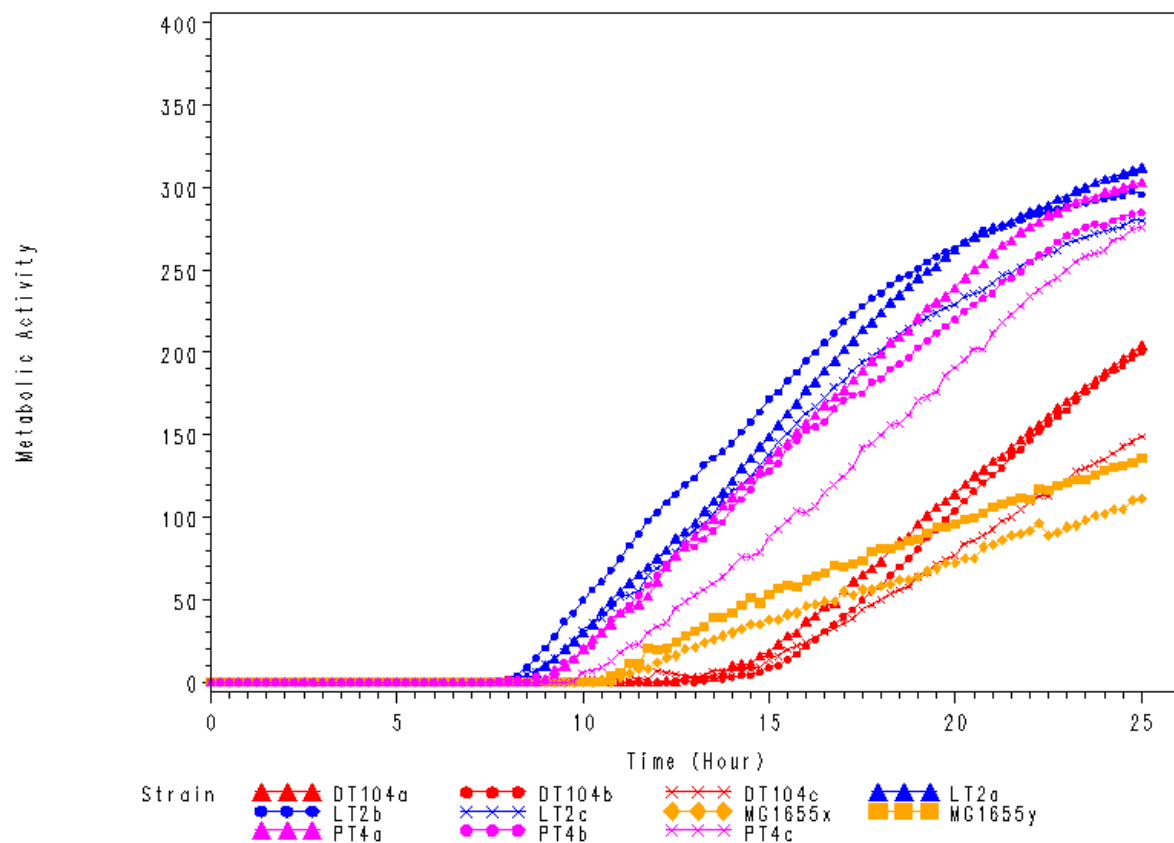

Kinetic Data of Sulphur Source Utilisation

PM04A, F07 (L-Cysteine)

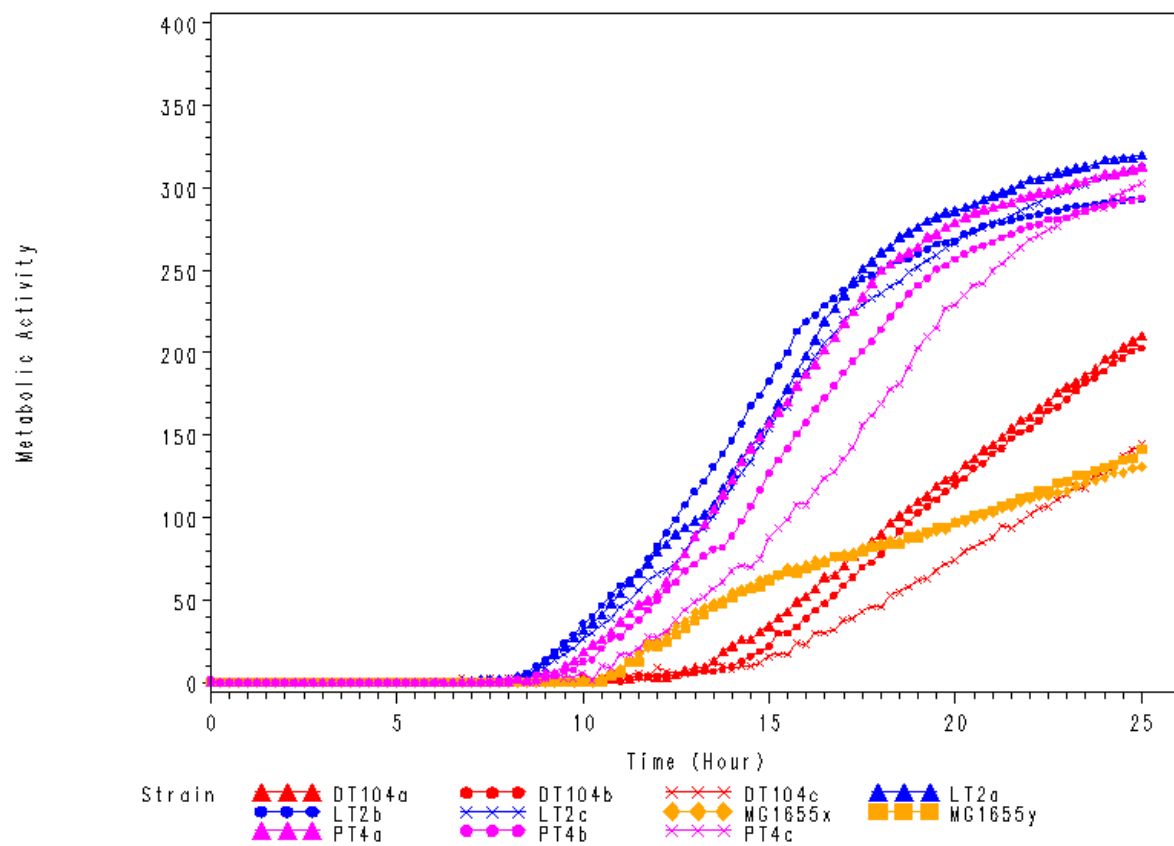

PM04A, F08 (D-Cysteine)

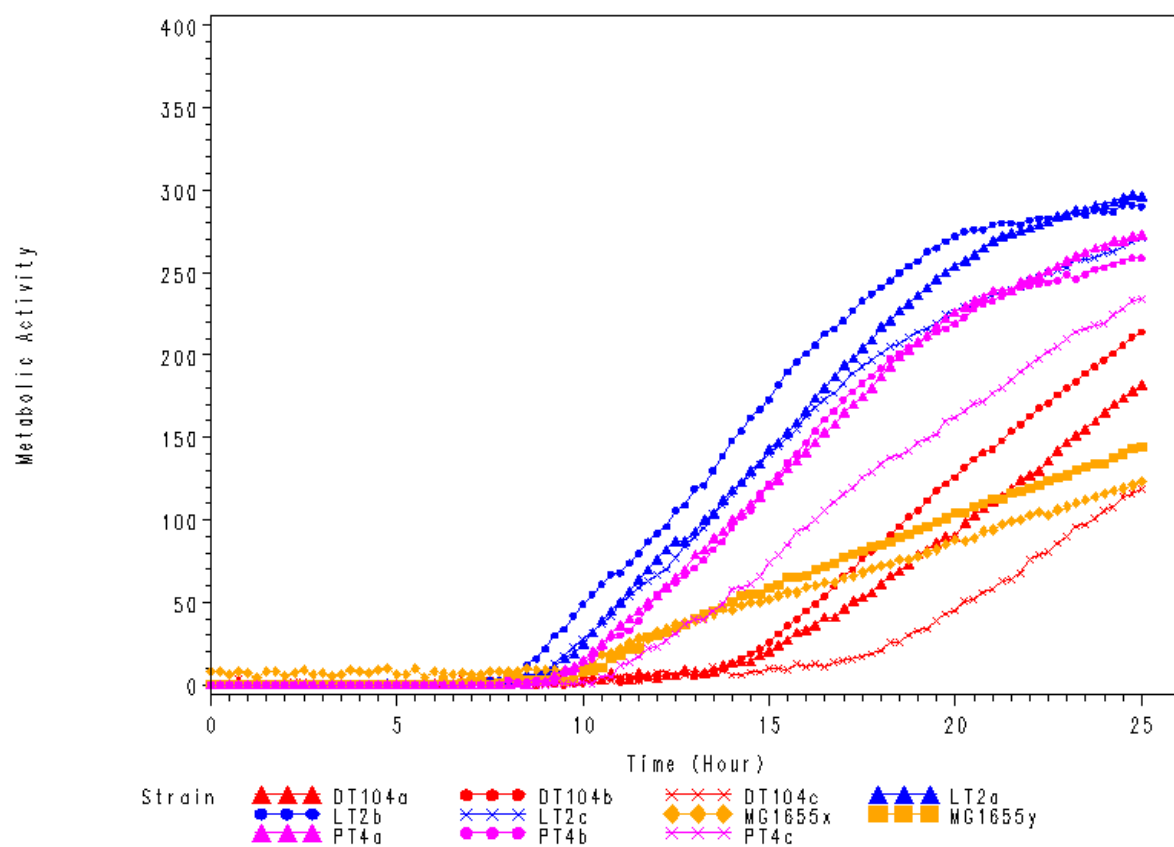

PM04A, F09 (L-Cysteinyl-Glycine)

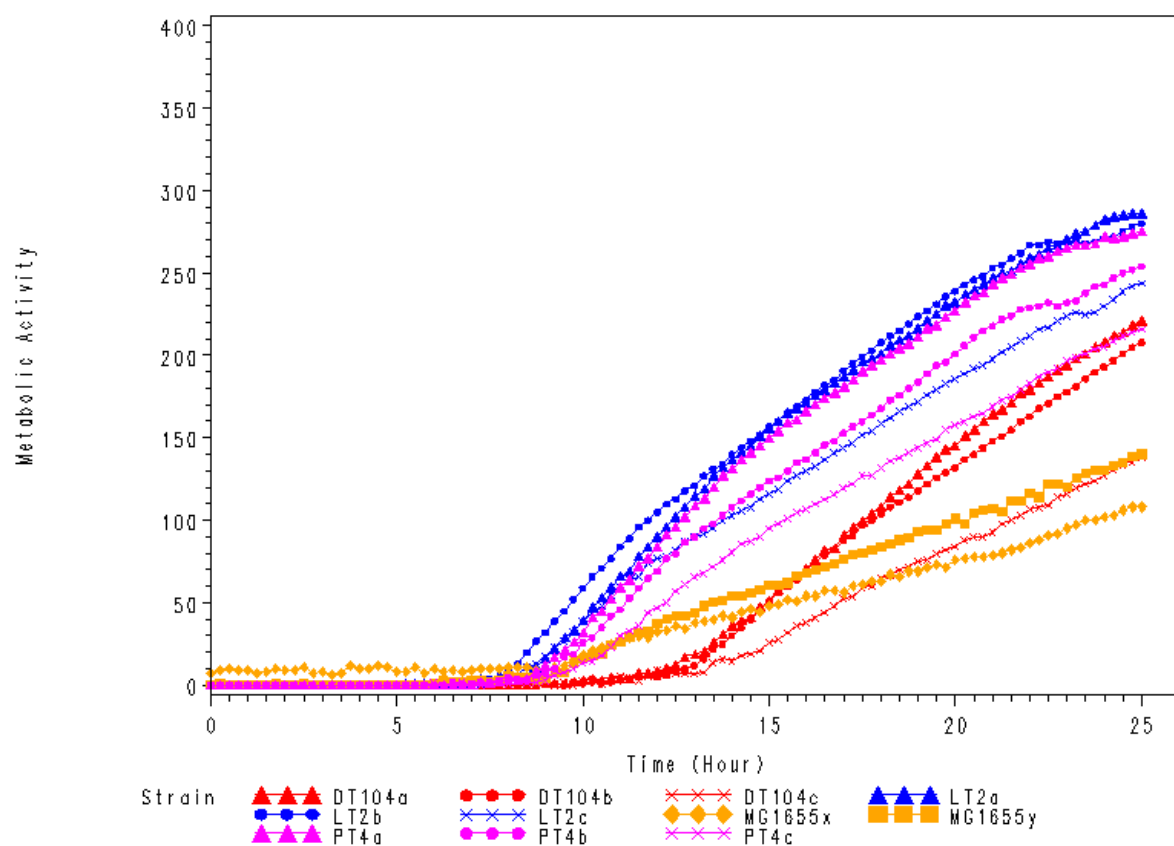

Kinetic Data of Sulphur Source Utilisation

PM04A, F10 (L-Cysteic Acid)

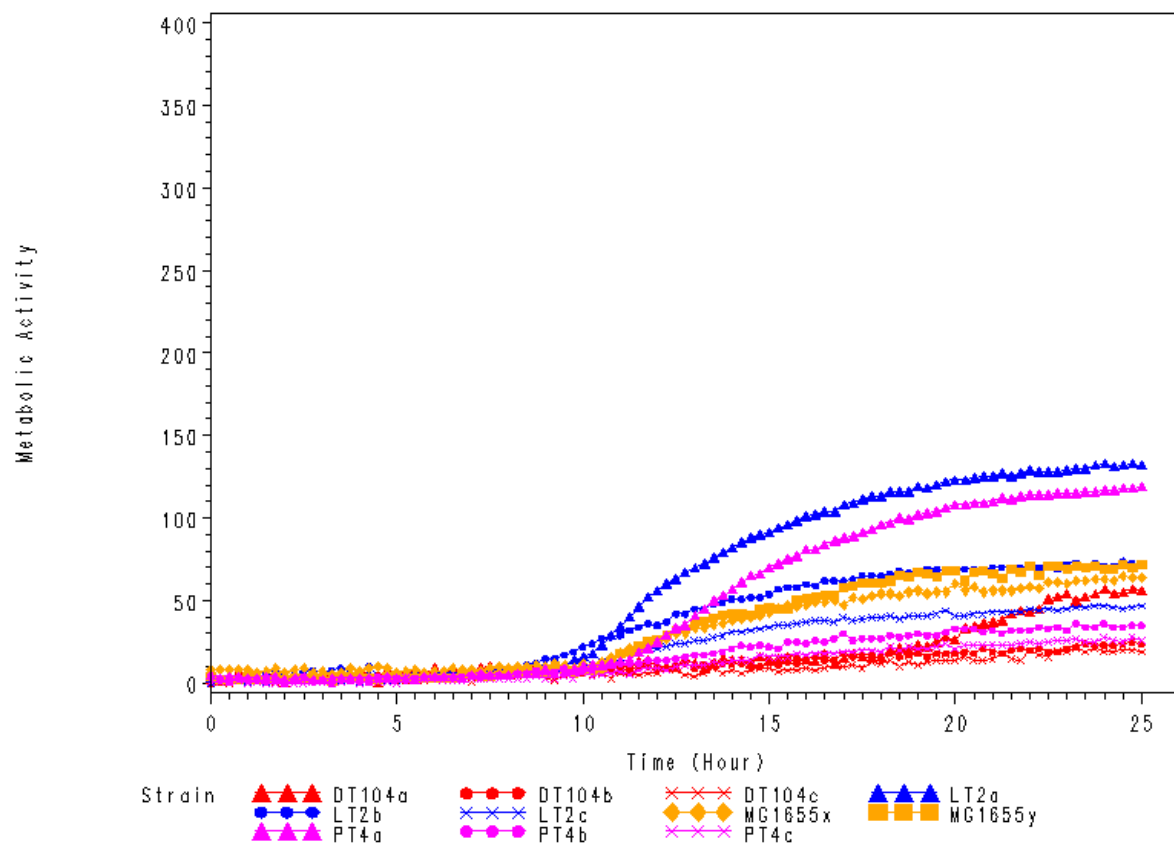

PM04A, F11 (Cysteamine)

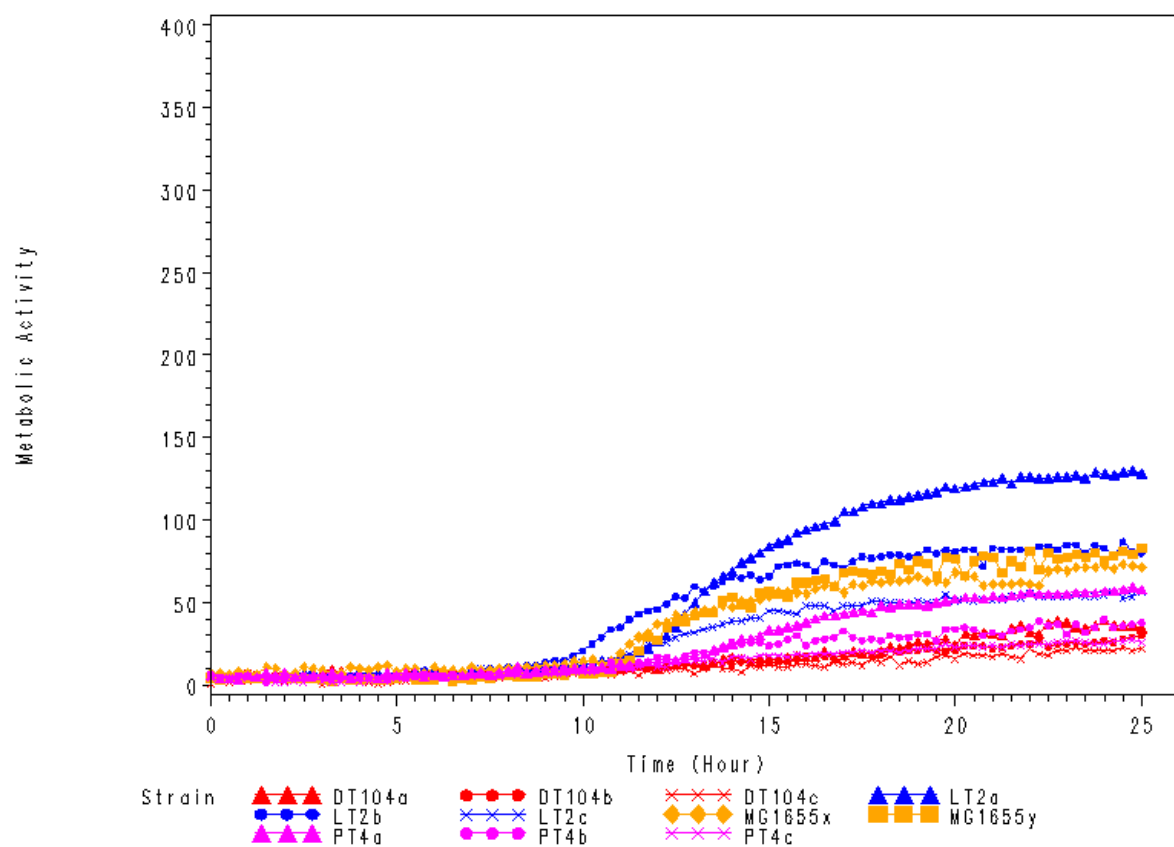

PM04A, F12 (L-Cysteine Sulfinic Acid)

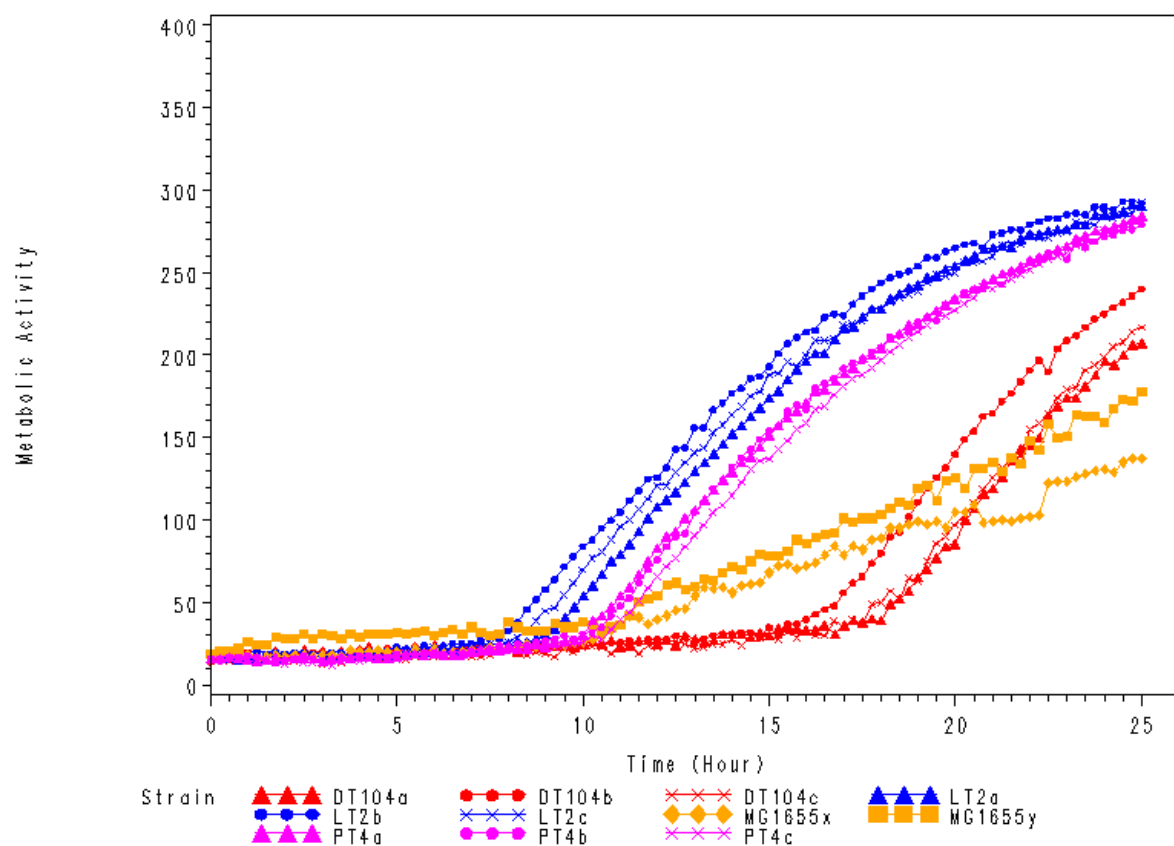

Kinetic Data of Sulphur Source Utilisation

PM04A, G01 (N-Acetyl-L-Cysteine)

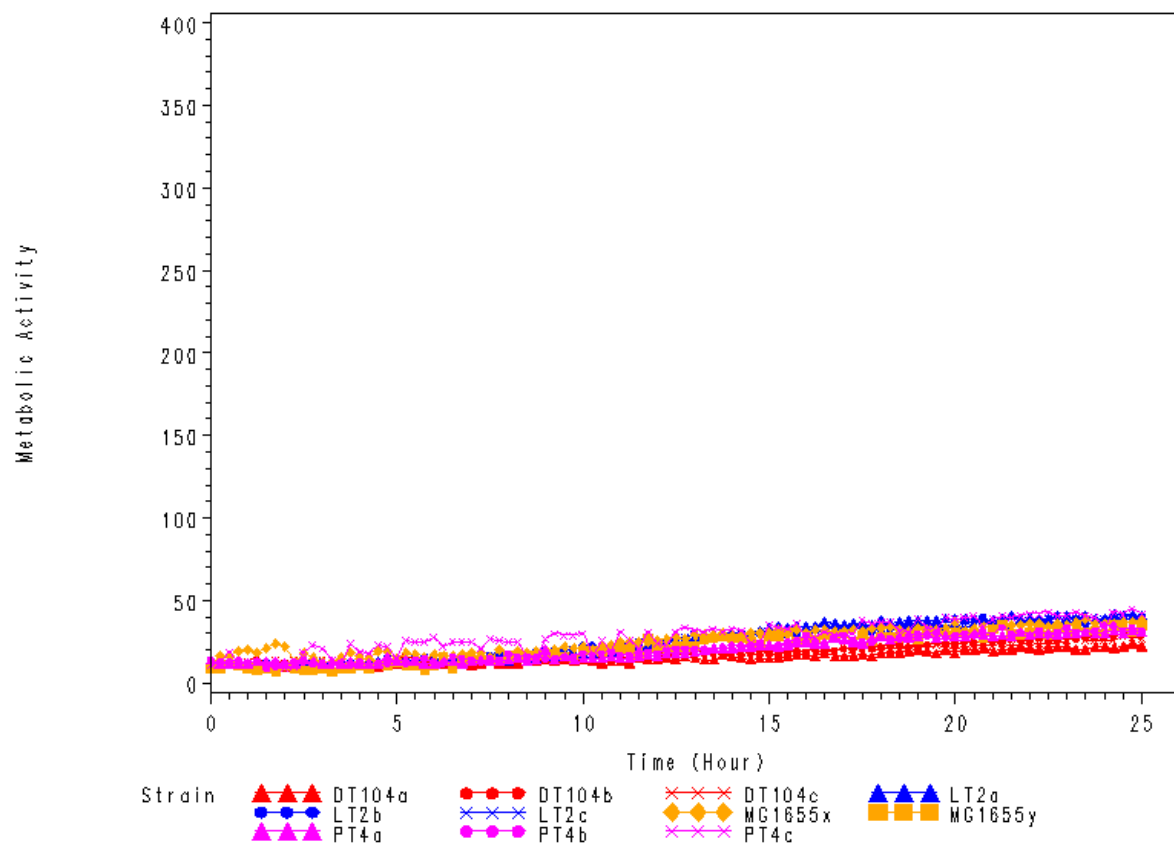

PM04A, G02 (S-Methyl-L-Cysteine)

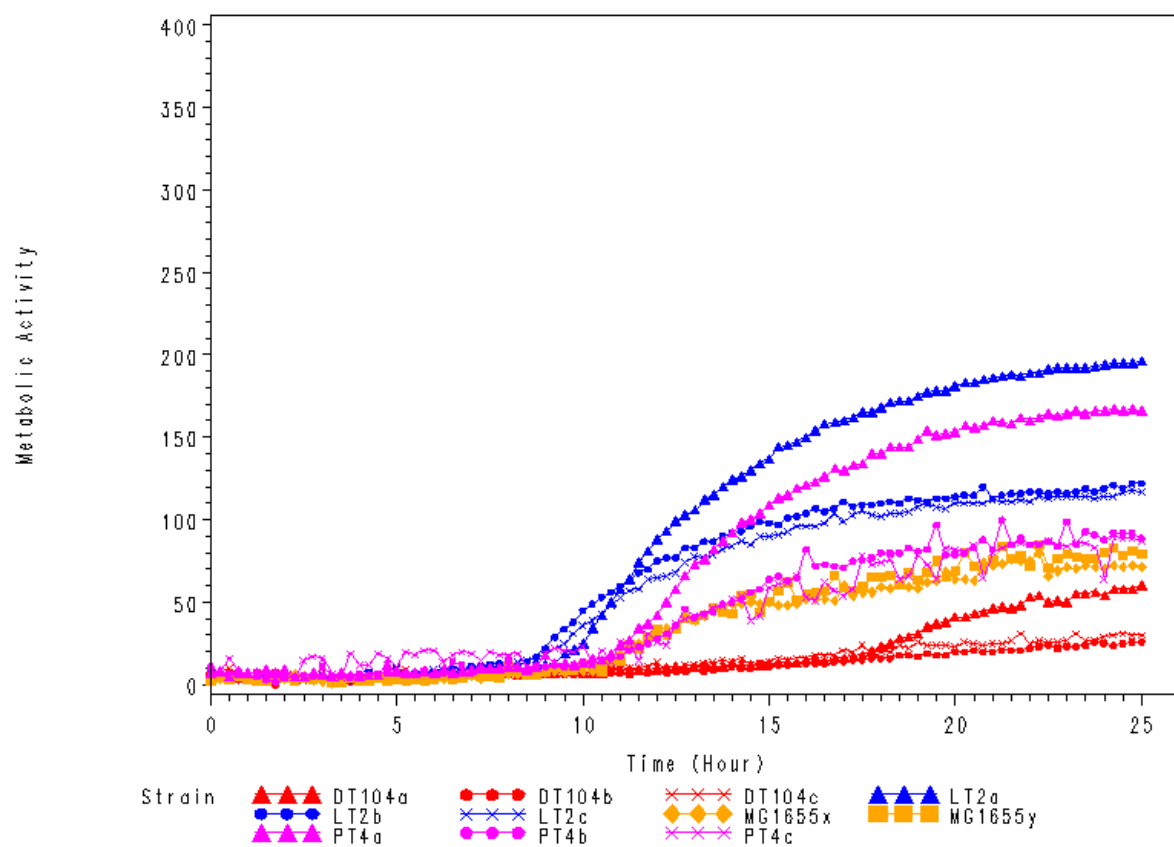

PM04A, G03 (Cystathionine)

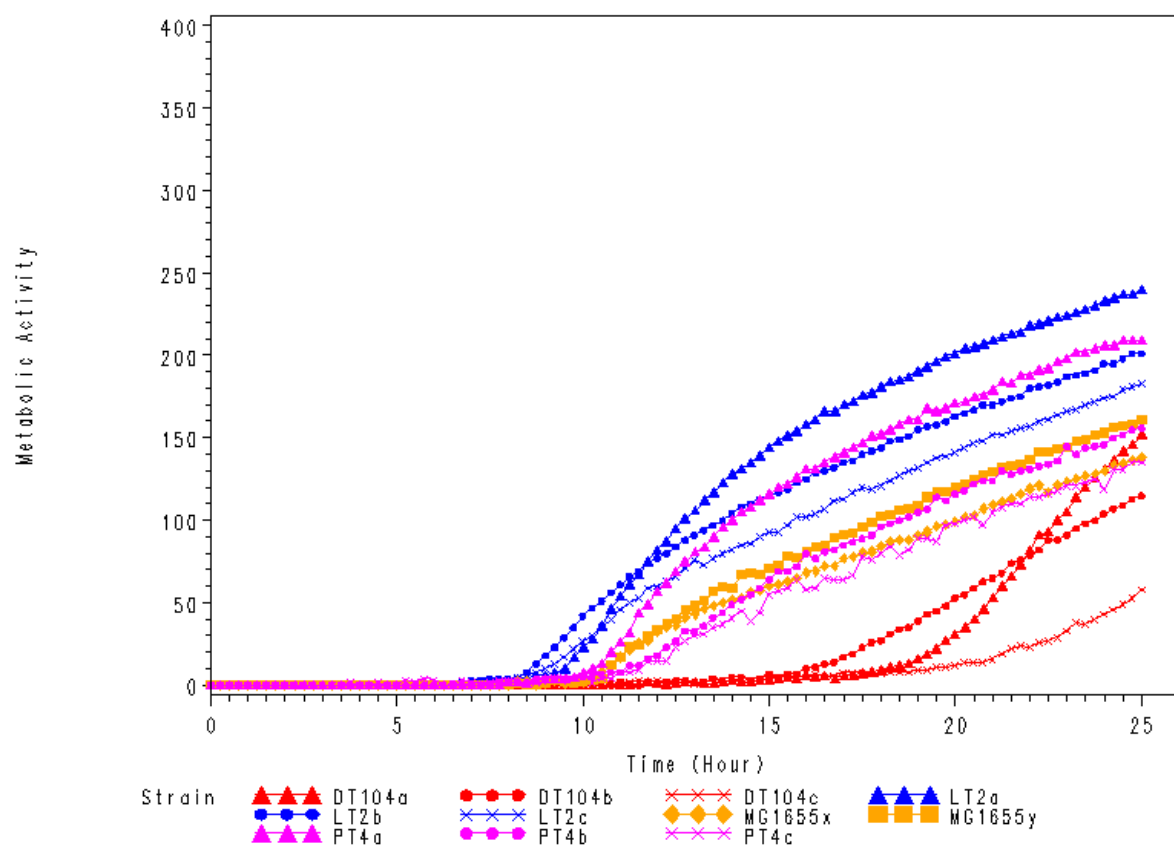

Kinetic Data of Sulphur Source Utilisation

PM04A, G04 (Lanthionine)

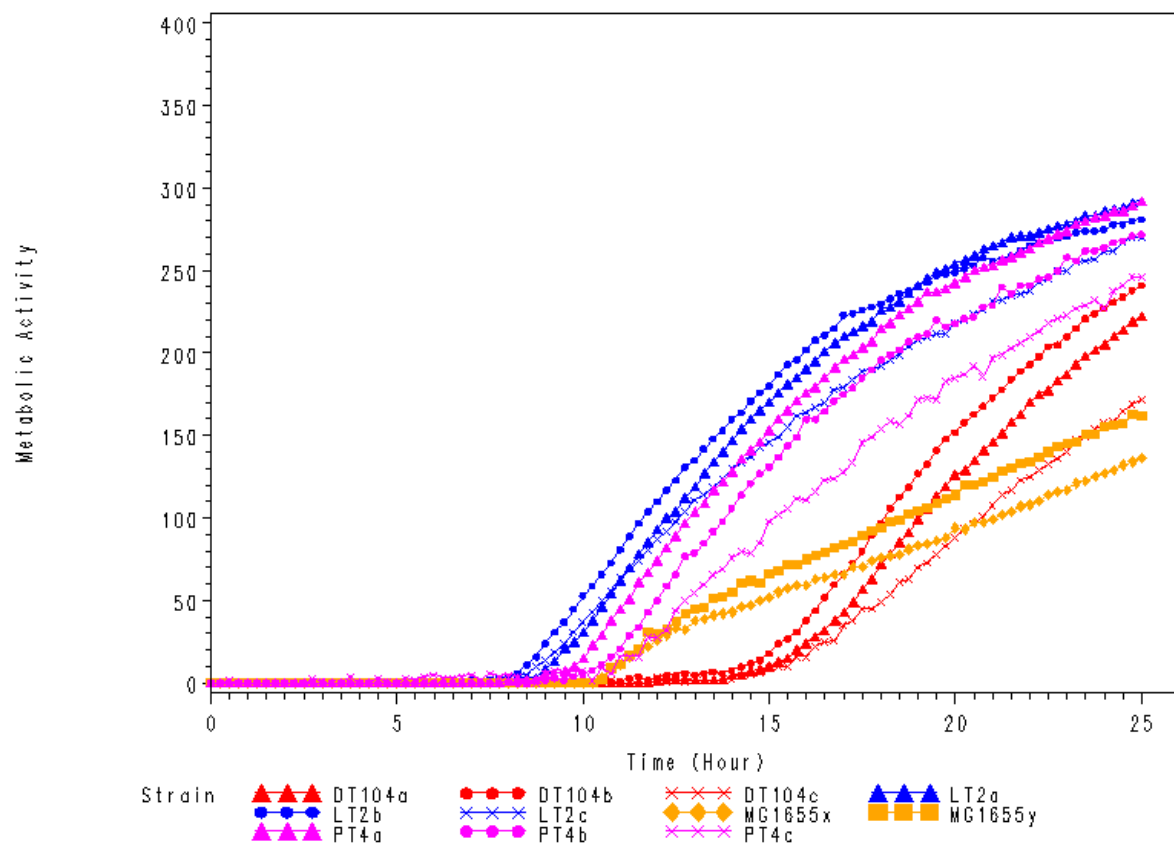

PM04A, G05 (Glutathione)

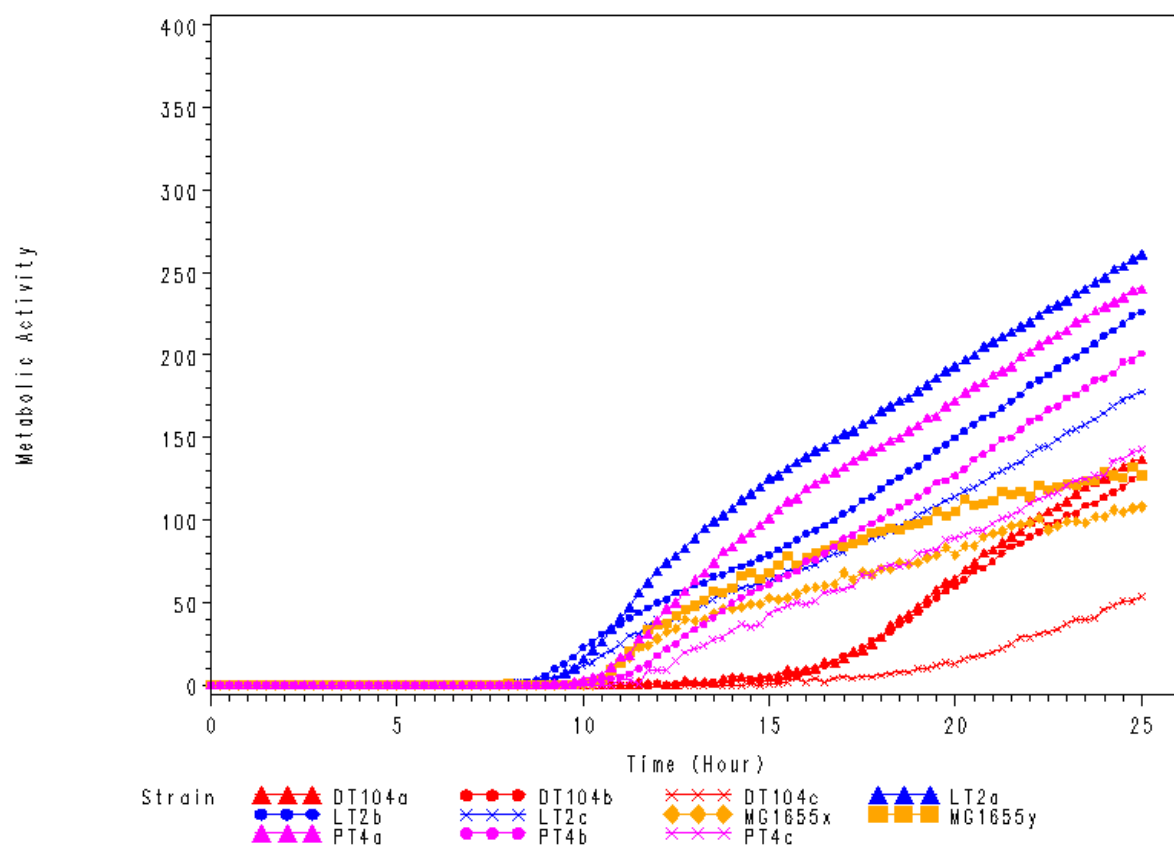

PM04A, G06 (D,L-Ethionine)

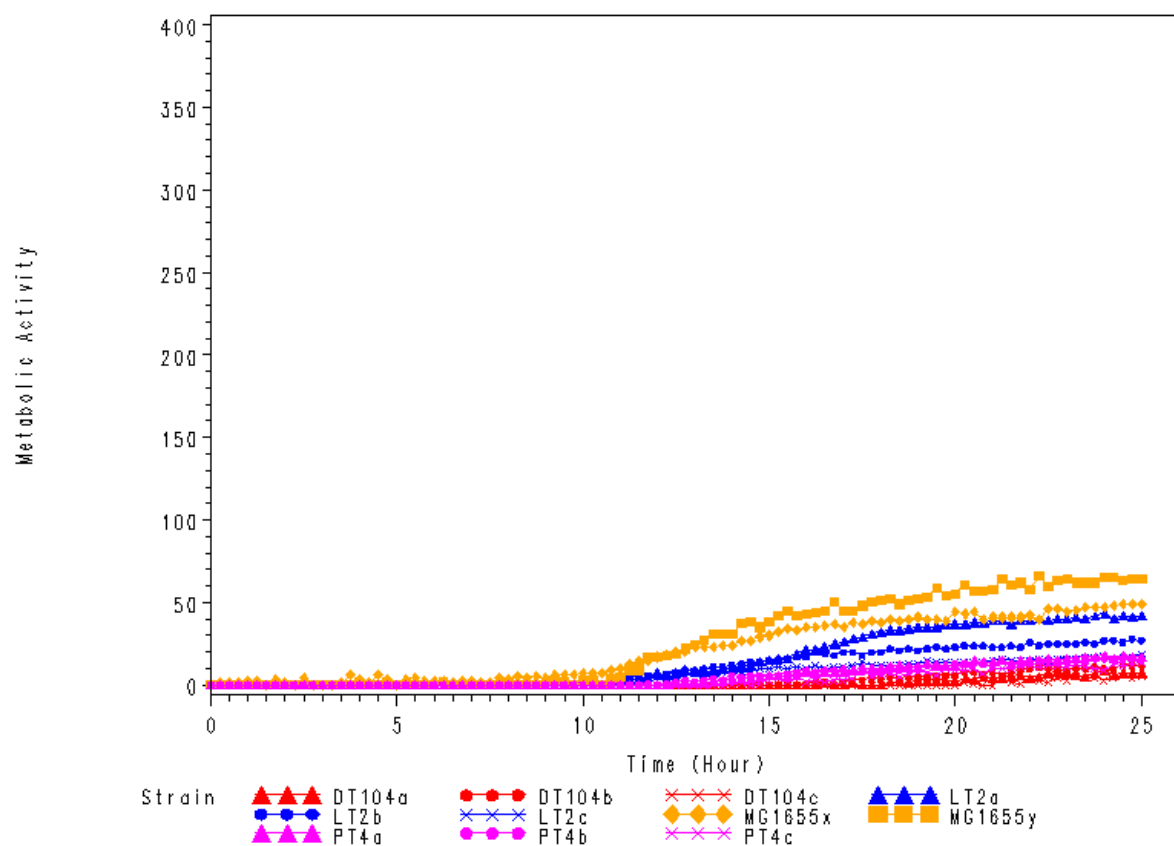

Kinetic Data of Sulphur Source Utilisation

PM04A, G07 (L-Methionine)

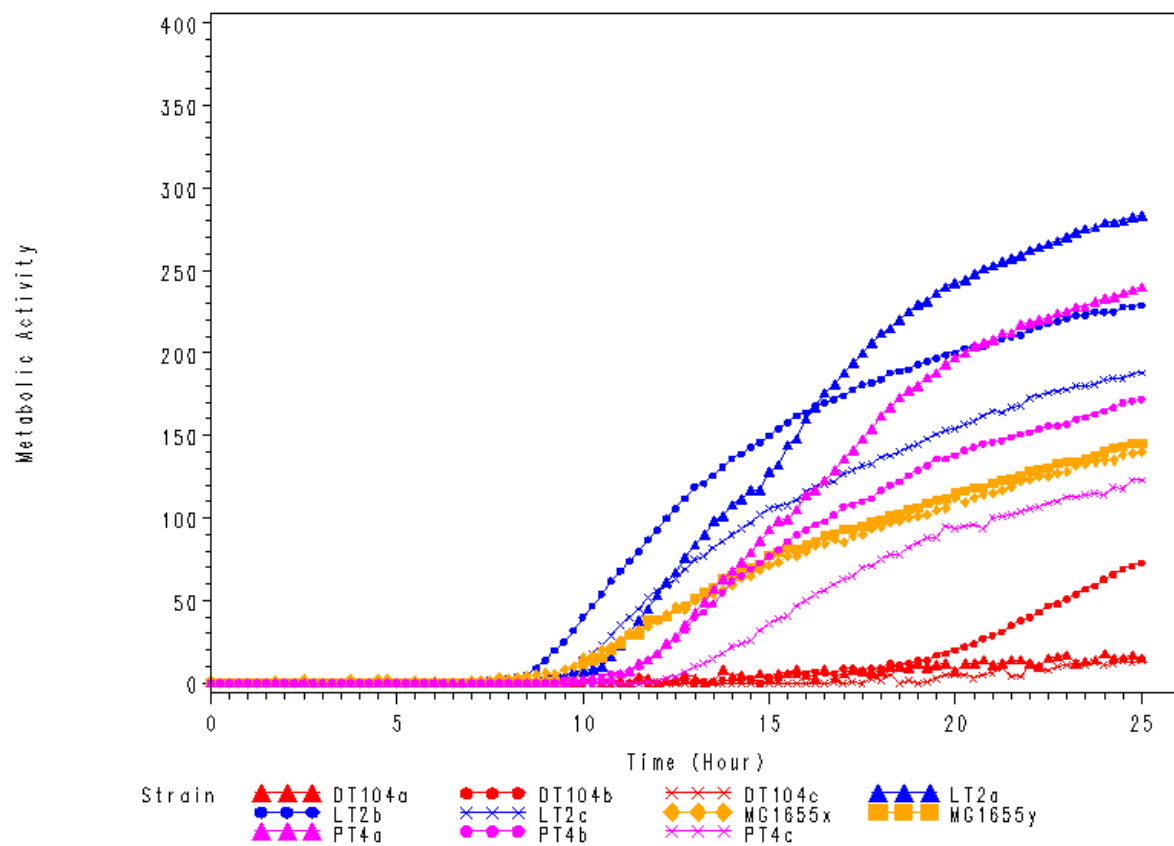

PM04A, G08 (D-Methionine)

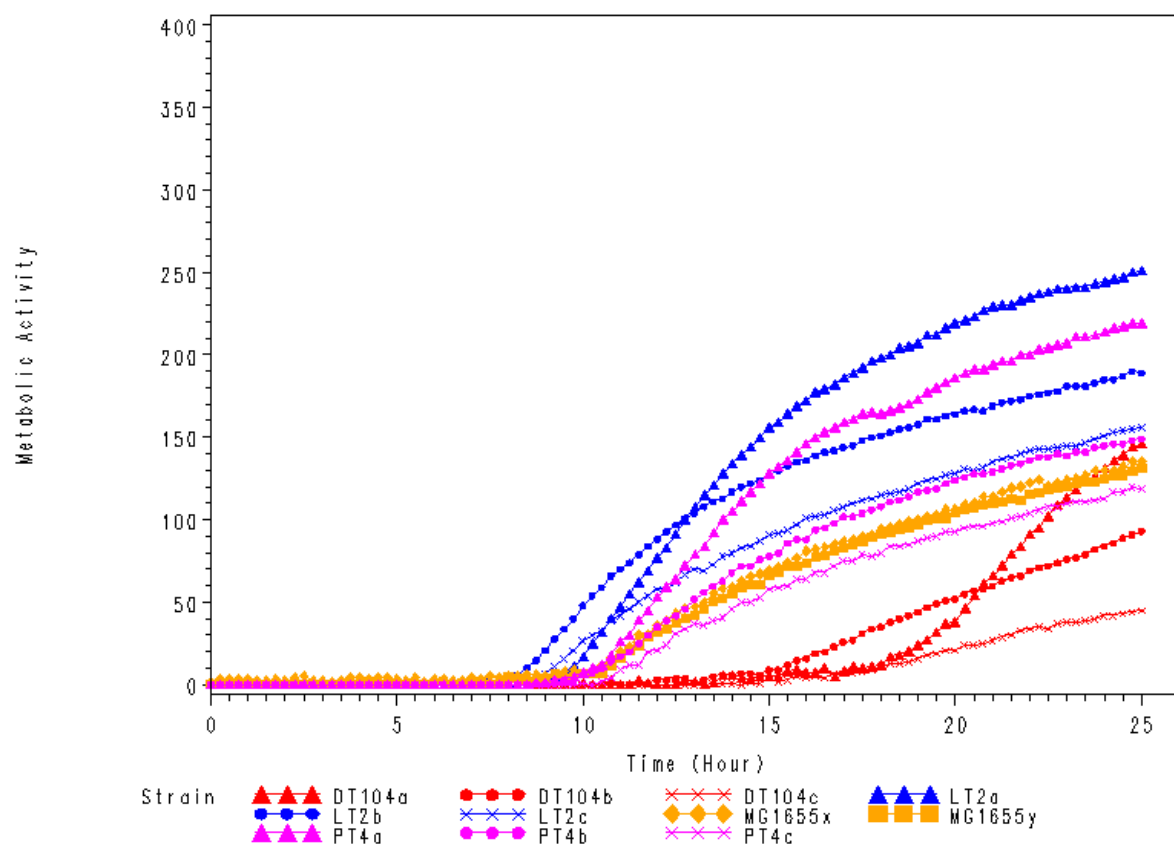

PM04A, G09 (Glycyl-L-Methionine)

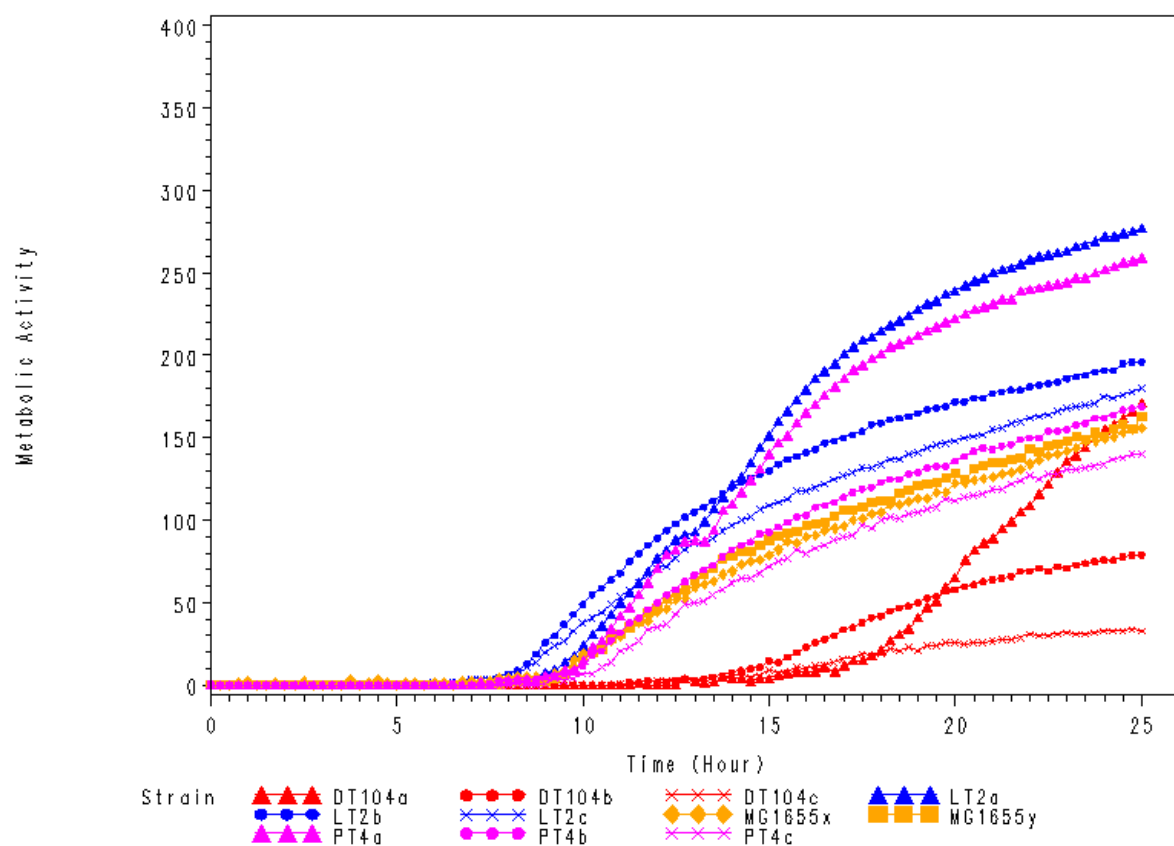

Kinetic Data of Sulphur Source Utilisation

PM04A, G10 (N-Acetyl-D,L-Methionine)

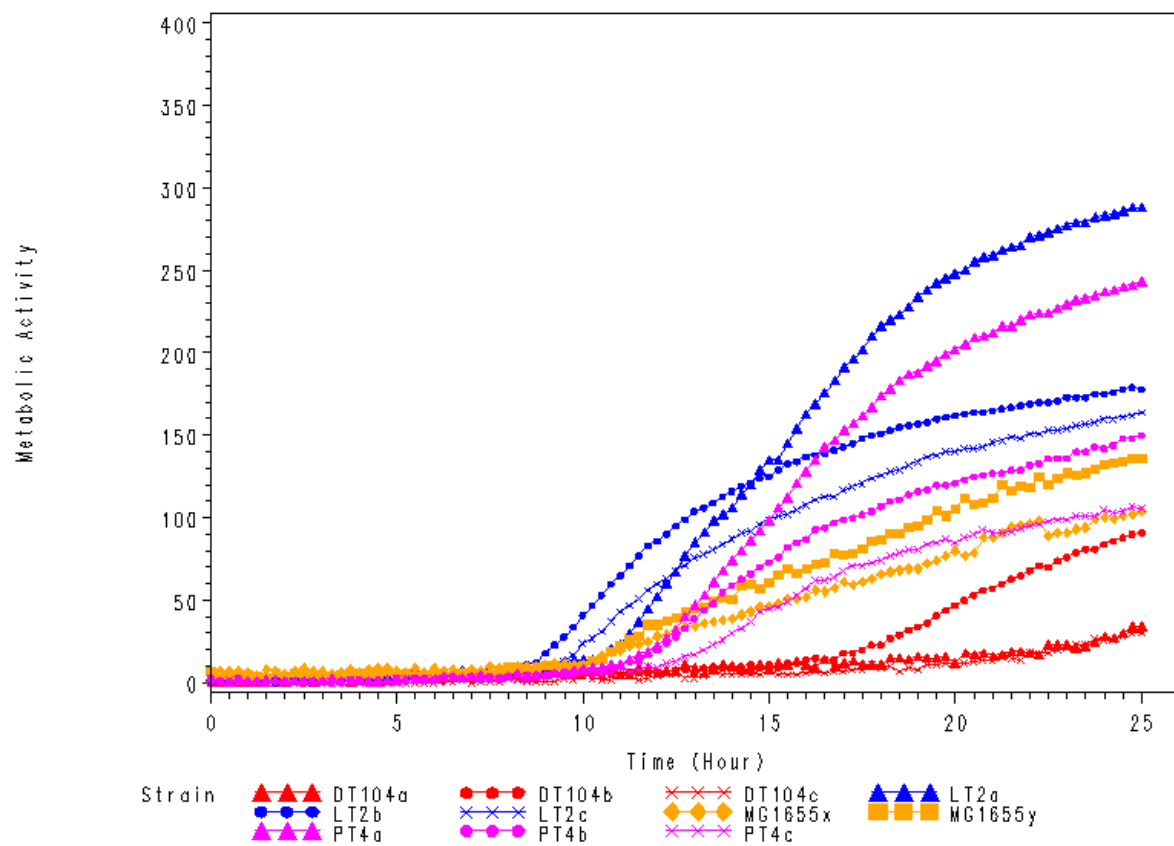

PM04A, G11 (L-Methionine Sulfoxide)

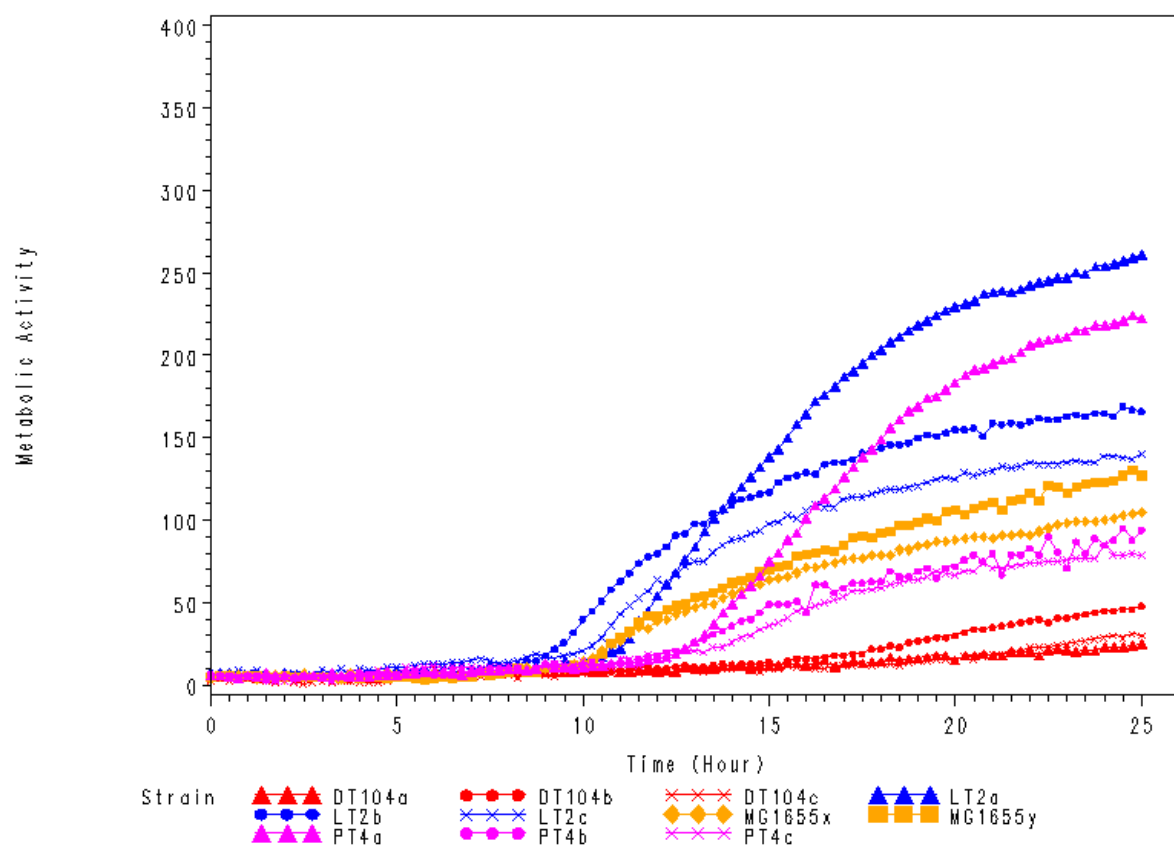

PM04A, G12 (L-Methionine Sulfone)

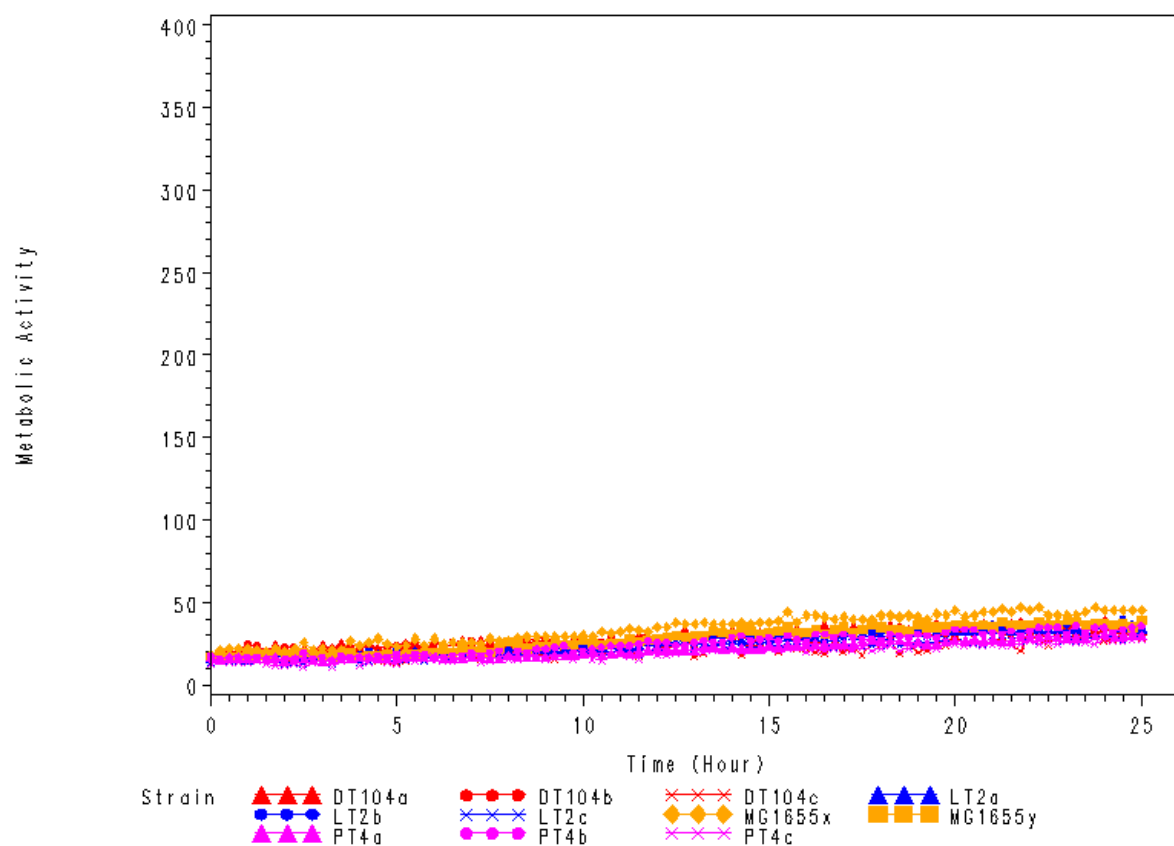



Kinetic Data of Sulphur Source Utilisation

PM04A, H01 (L-Djenkolic Acid)

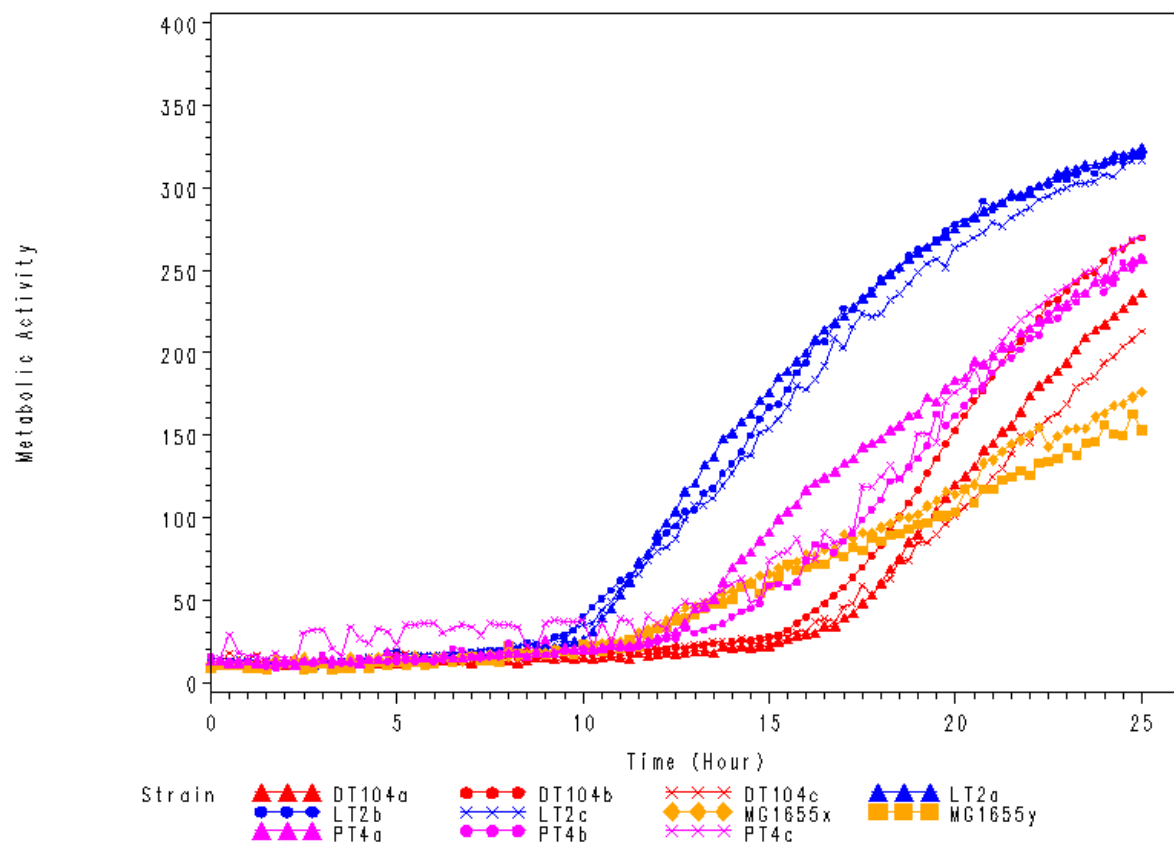

PM04A, H02 (Thiourea)

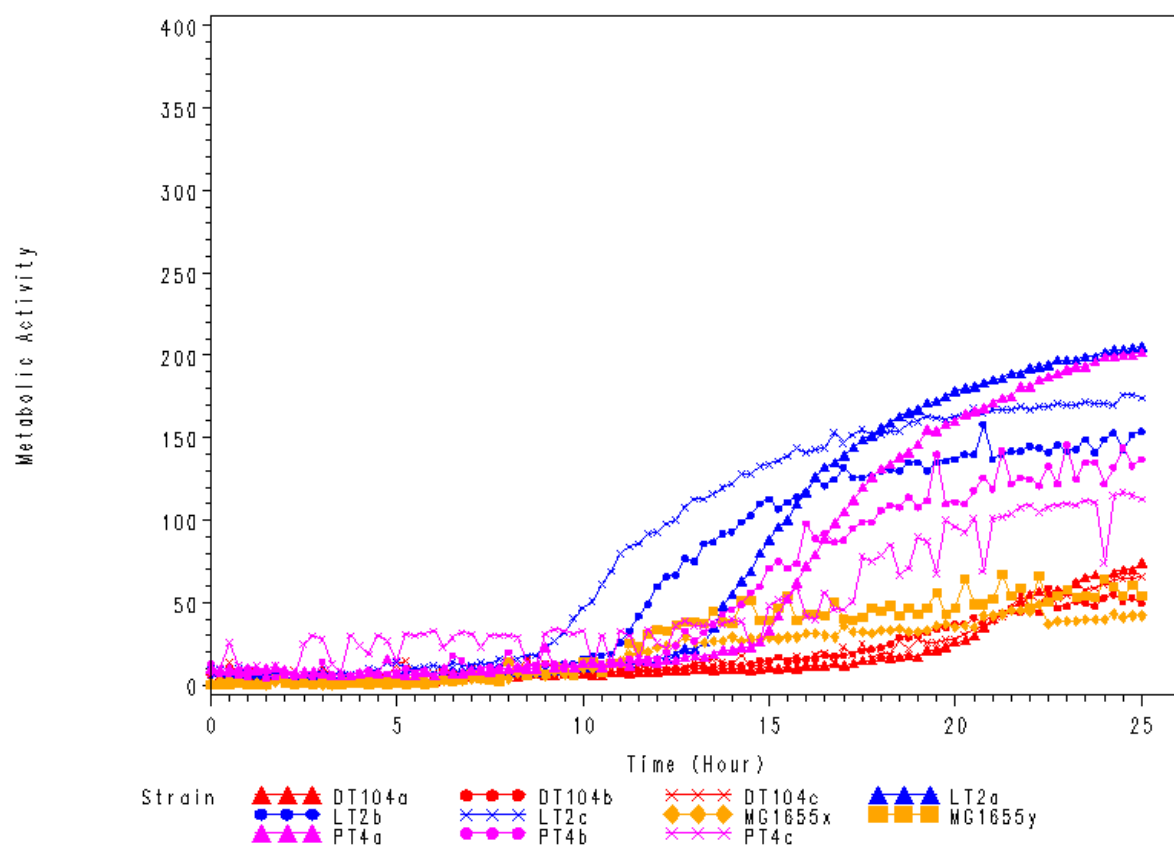

PM04A, H03 (1-Thio-b-D-Glucose)

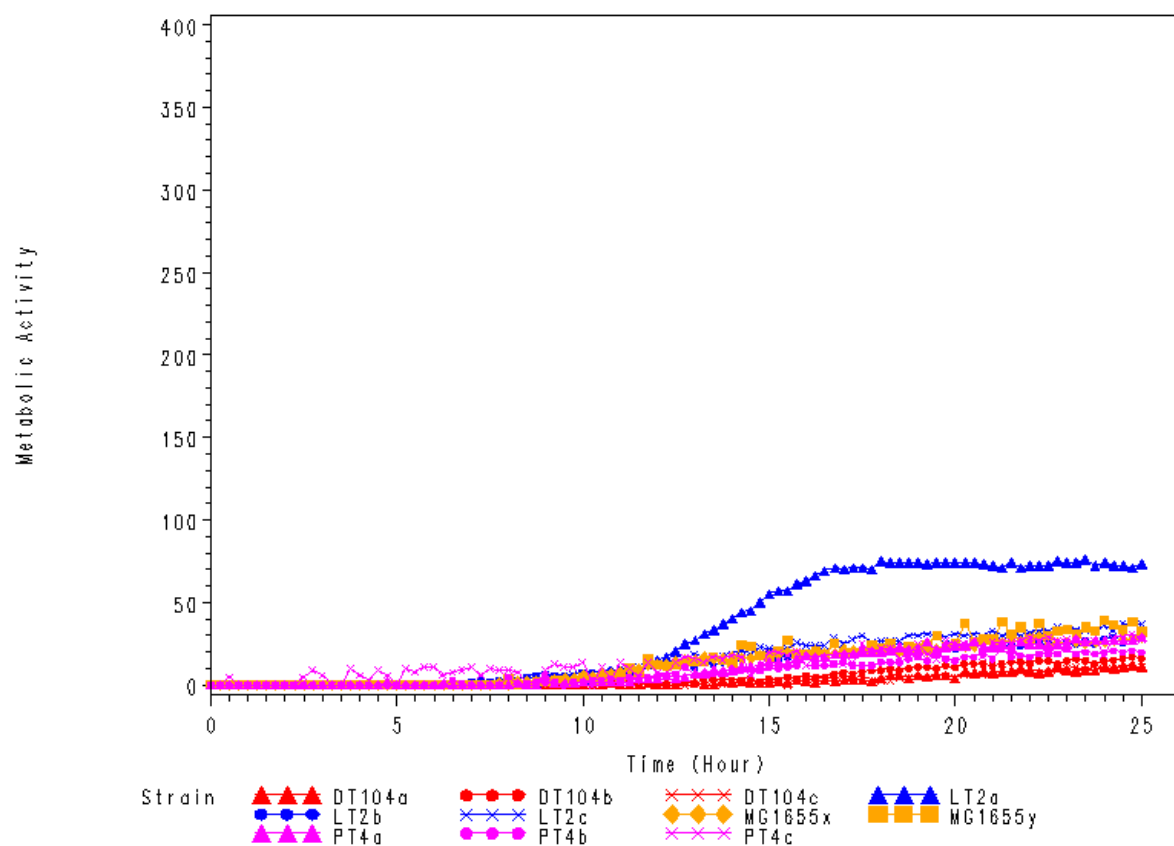

Kinetic Data of Sulphur Source Utilisation

PM04A, H04 (D,L-Lipoamide)

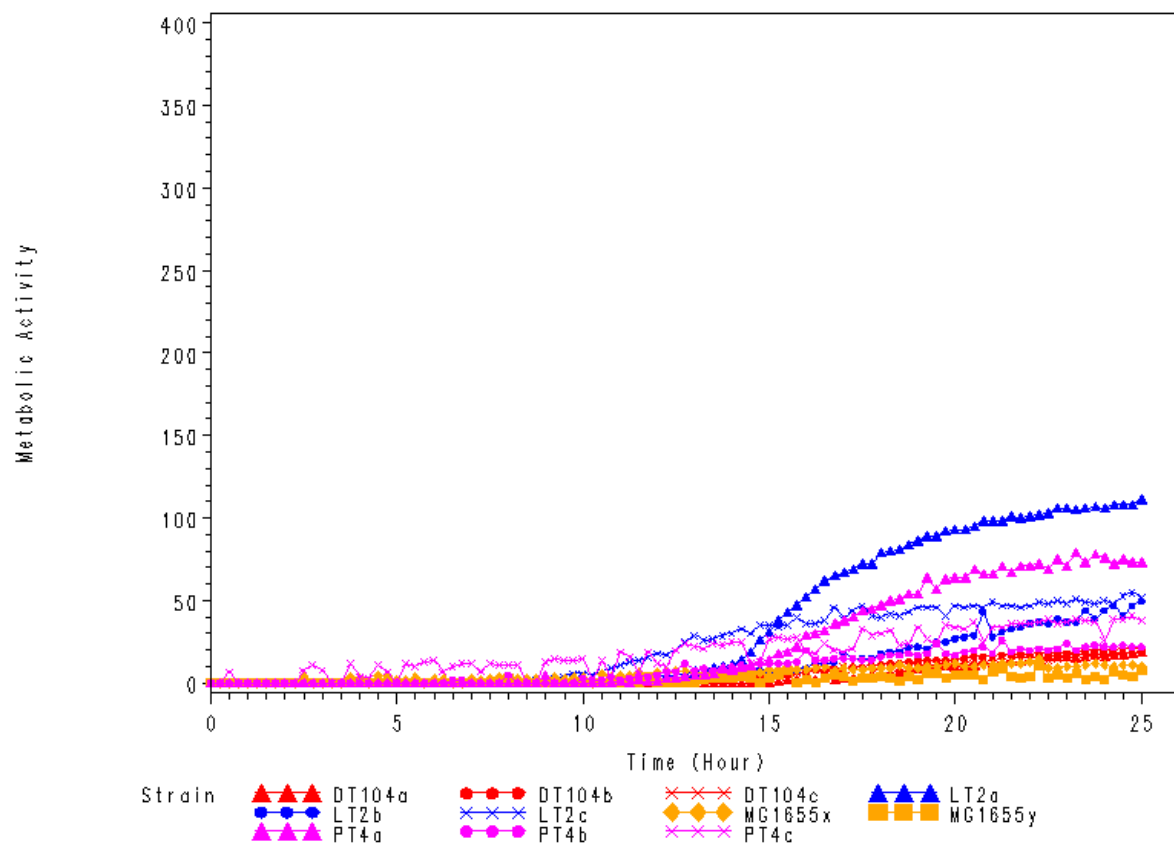

PM04A, H05 (Taurocholic Acid)

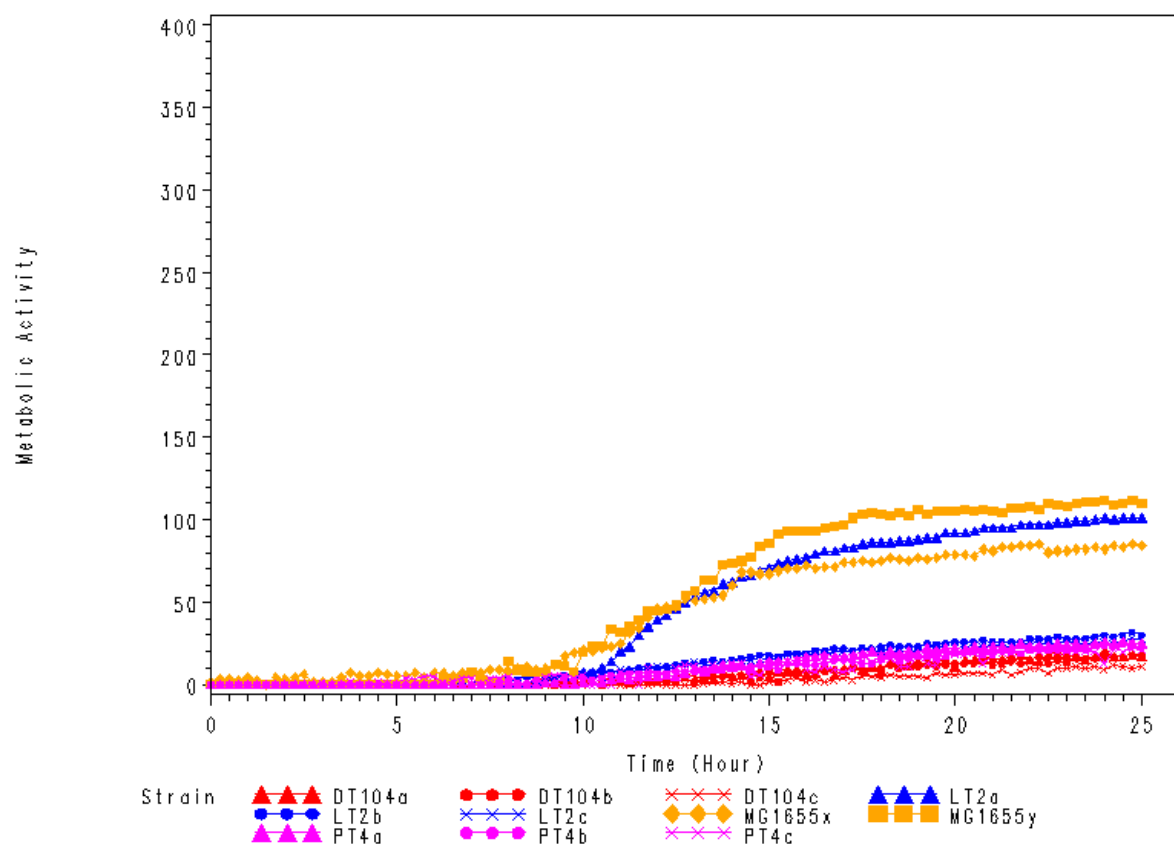

PM04A, H06 (Taurine)

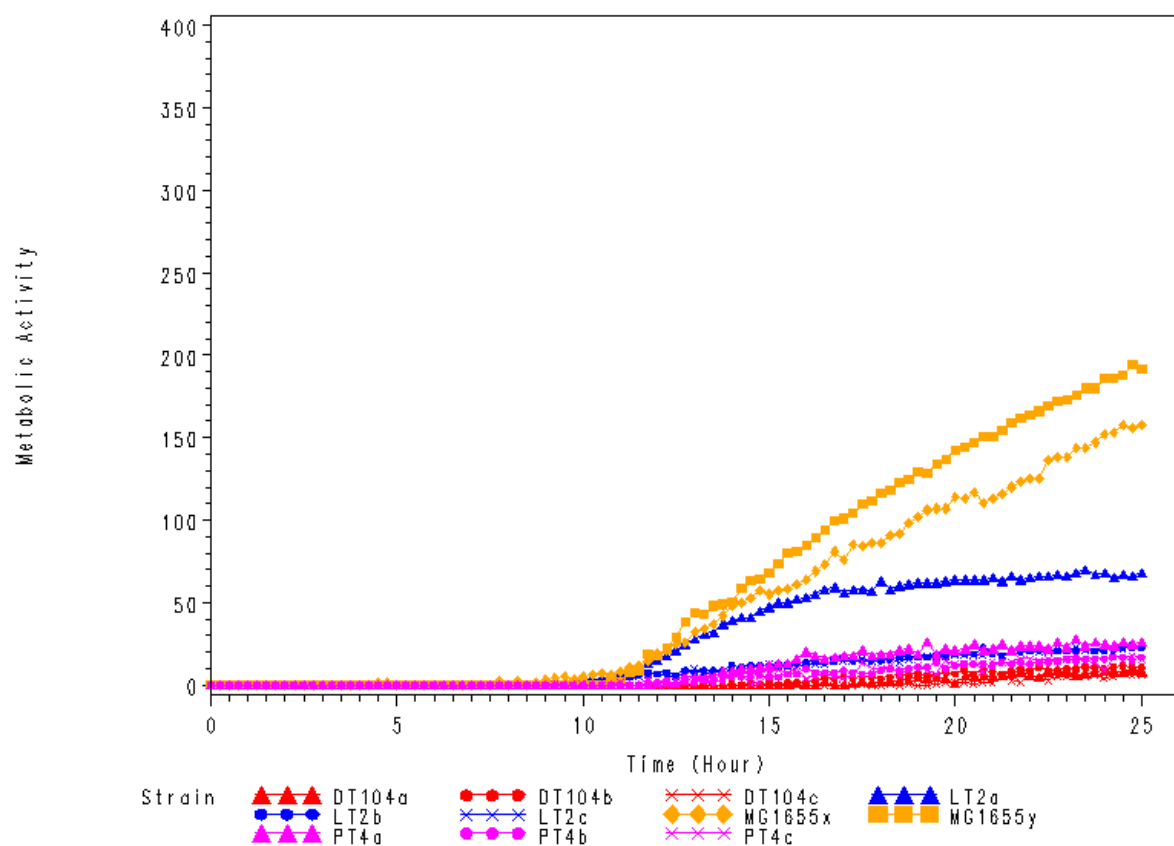

Kinetic Data of Sulphur Source Utilisation

PM04A, H07 (Hypotaurine)

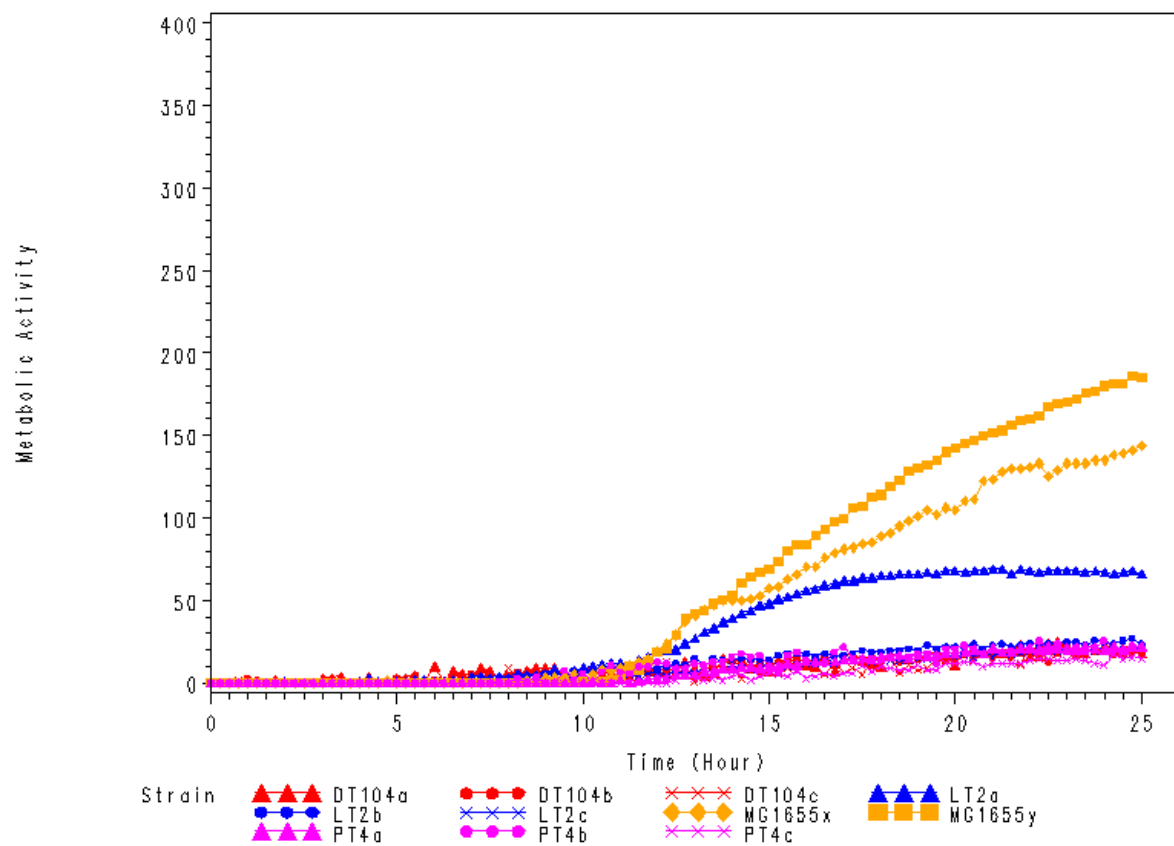

PM04A, H08 (p-Amino Benzene Sulfonic Acid)

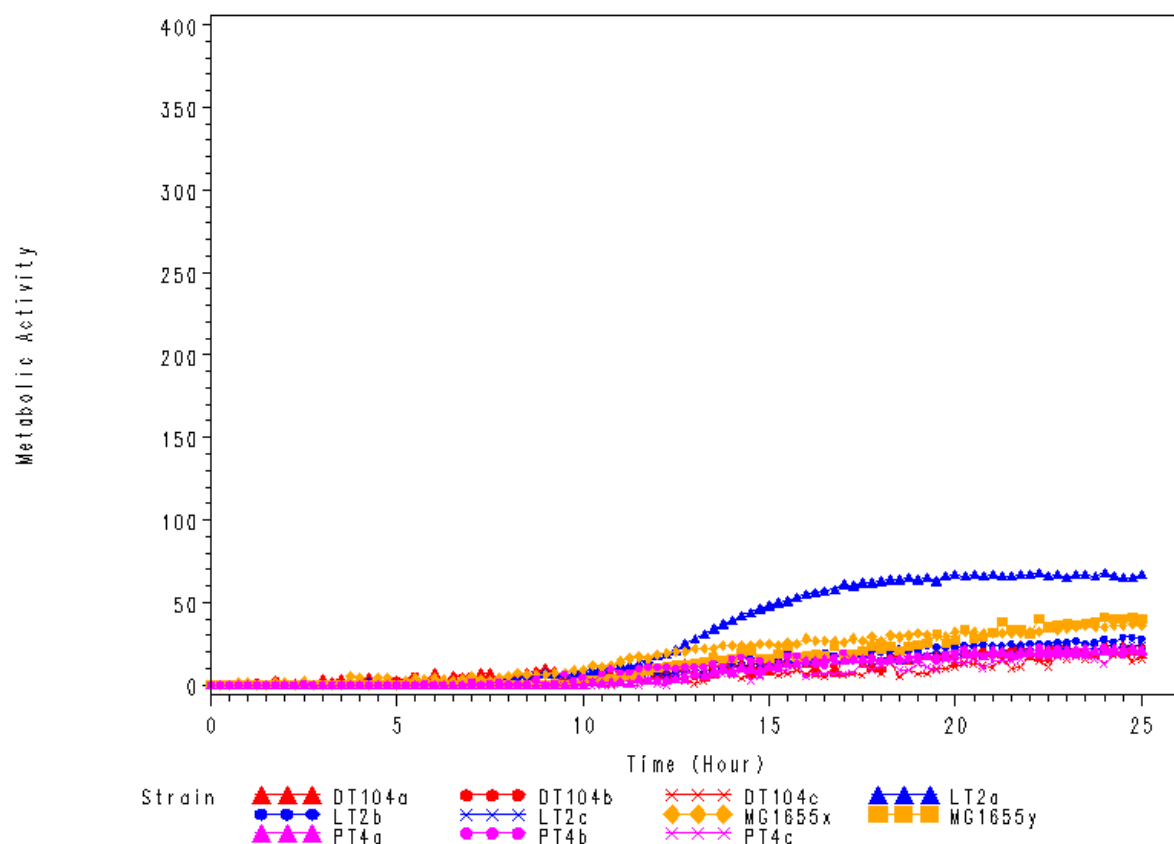

PM04A, H09 (Butane Sulfonic Acid)

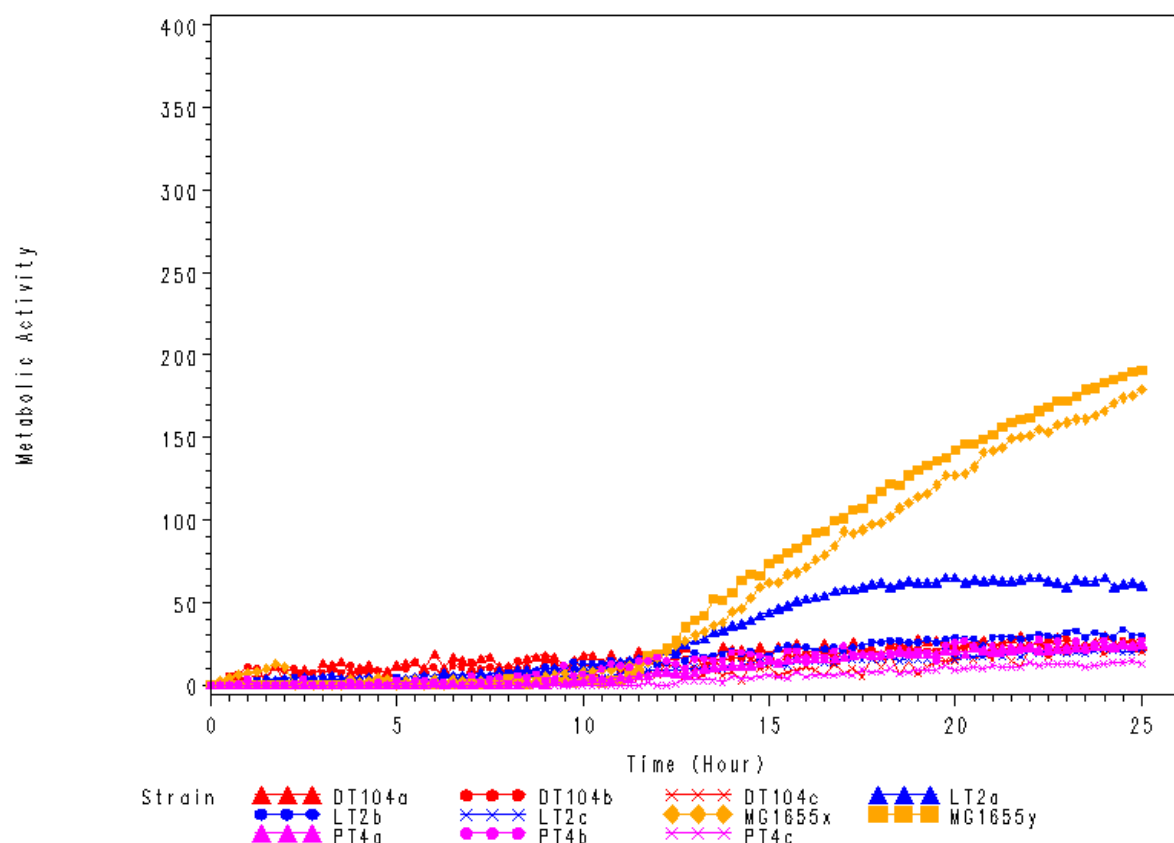

PM04A, H10 (2-Hydroxyethane Sulfonic Acid)

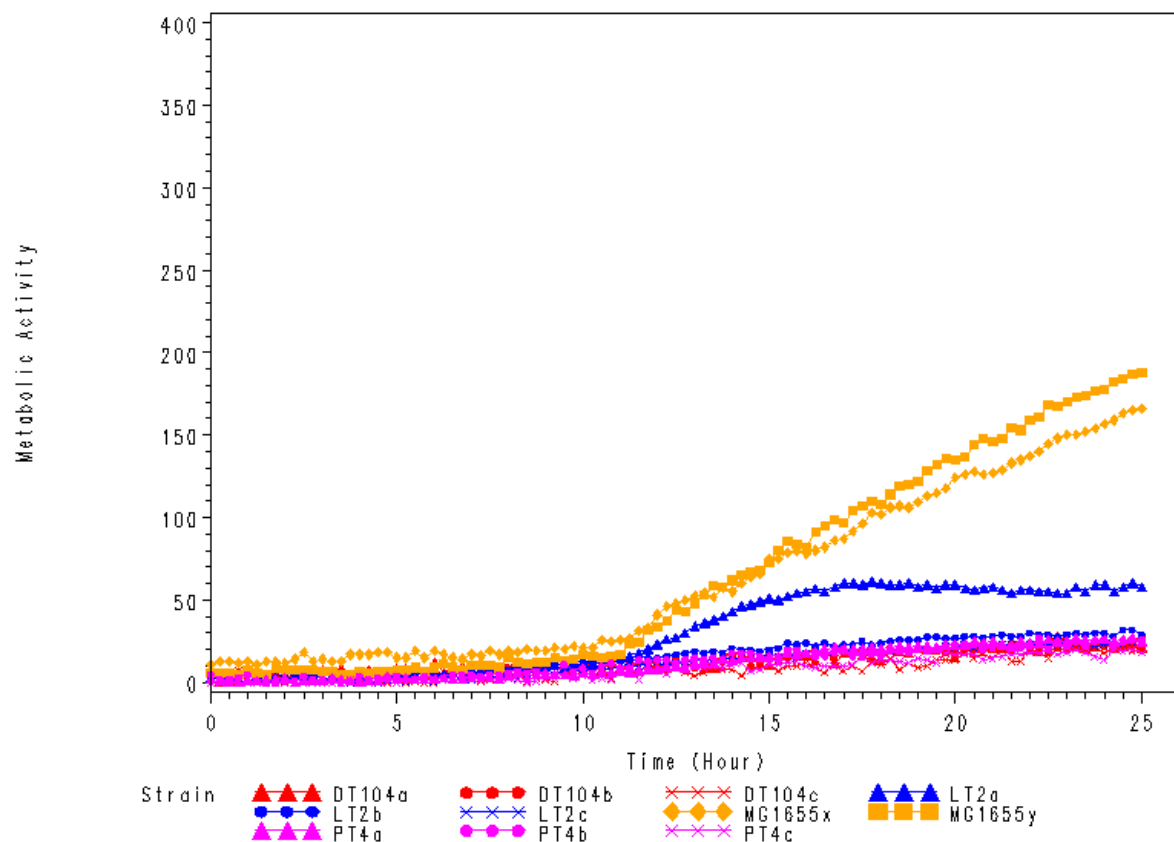

PM04A, H11 (Methane Sulfonic Acid)

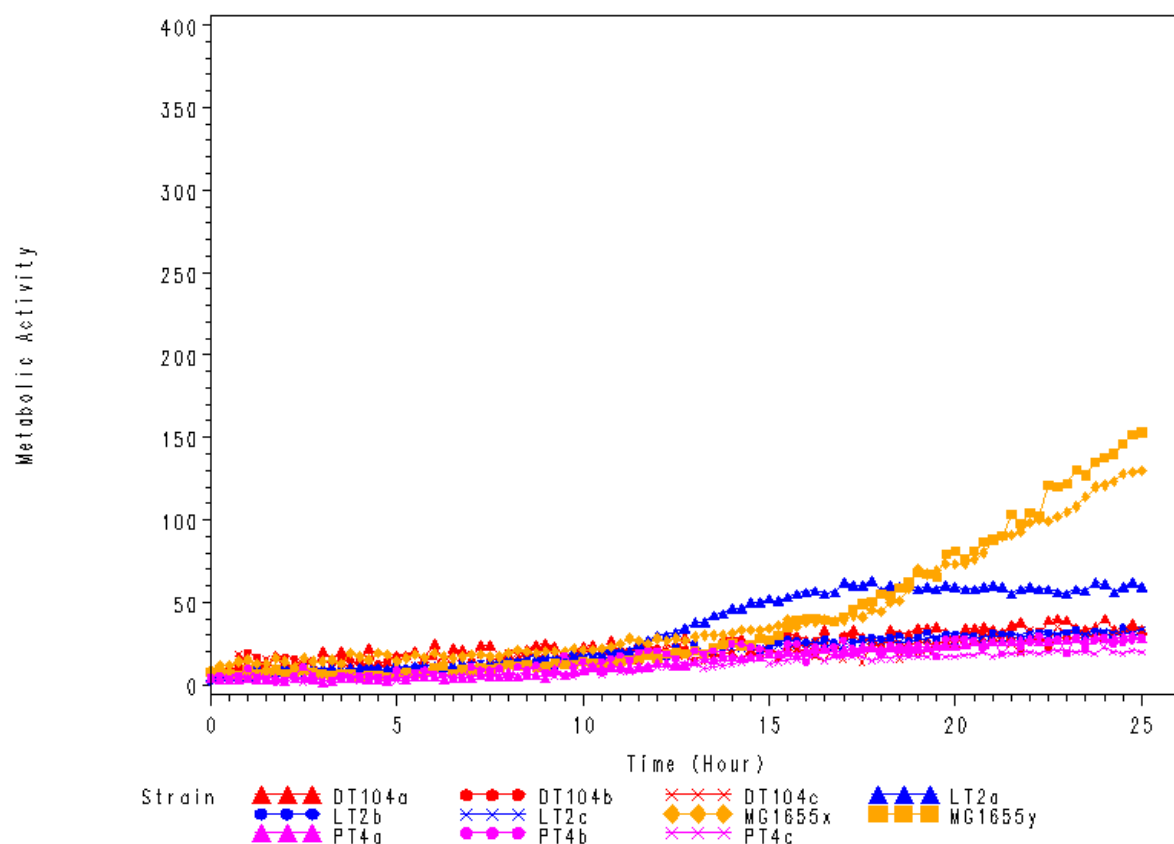

PM04A, H12 (Tetramethylene Sulfone)

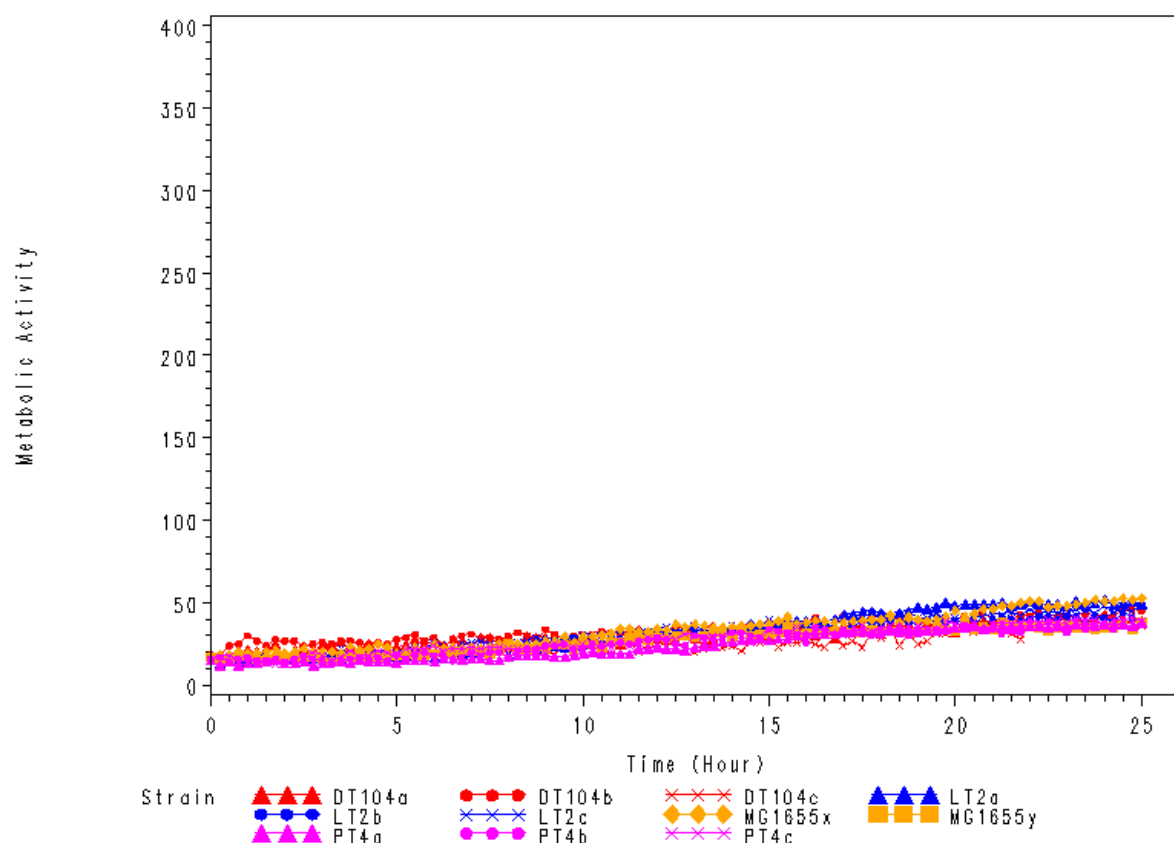

Supplement: supp_M109.005868_jbc.M109.005868-4.pdf [file supp_M109.005868_jbc.M109.005868-4.pdf]
